# Supplementary material
Source: Research Square preprint supplement (doi:10.21203/rs.3.rs-9652440/v1)
Supplement: Supplementary file 1 [file 1897cbabaf7c2017e287589e.xlsx]

## Sheet: siYAP_TAZ (2)
Gene Symbol	siCtrl Average Read Count	siYAP_TAZ Average Read Count	log2 (siYAP_TAZ / siCtrl)	Pvalue(siYAP_TAZ / siCtrl)	Qvalue (siYAP_TAZ / siCtrl)	-log10(q-value)
RFLNA	220.57	1.66	-7.05436	1.08224e-13	1.25021e-10	9.90302
SERPINA9	2083.48	67.27	-4.95296	1.56499e-24	8.43686e-21	20.0738
MYOCD	184.46	5.98	-4.94684	1.05502e-23	4.26573e-20	19.37
ANKRD1	382.58	13.18	-4.85908	4.2289e-12	2.84975e-09	8.54519
KCTD4	53.49	1.97	-4.76556	6.51577e-06	0.000769194	3.11396
ODAPH	237.75	8.96	-4.72938	2.37126e-28	1.91752e-24	23.7173
COL10A1	81.68	3.92	-4.38177	3.12177e-10	1.40125e-07	6.85349
TRPC4	125.23	6.63	-4.23875	2.03754e-12	1.5692e-09	8.80432
KRTAP1-5	23.6	1.32	-4.16095	6.22276e-05	0.00453337	2.34358
SSTR1	38.48	2.33	-4.04606	2.79775e-06	0.000370886	3.43076
CCN2	11278.1	719.61	-3.97017	2.98859e-13	3.0209e-10	9.51986
C5orf46	46.98	3	-3.96879	5.10307e-09	1.5239e-06	5.81704
THBS1	30347.3	1961.41	-3.9516	0.000195845	0.0108846	1.96319
YAP1	2897.14	192.62	-3.91077	4.46695e-19	1.20407e-15	14.9193
DKK1	533.87	39.8	-3.74577	5.14589e-13	4.89556e-10	9.3102
HAS2	3903.7	291.16	-3.74495	0.00013531	0.00821563	2.08536
KRT34	65.97	4.96	-3.73392	1.68545e-10	8.26025e-08	7.08301
KCNH1	102.7	7.96	-3.68864	1.30484e-08	3.34971e-06	5.47499
EDN1	614.46	58.4	-3.39529	1.25733e-09	4.32656e-07	6.36386
AJUBA	544.03	54.23	-3.32646	1.22222e-11	7.32107e-09	8.13543
TAGLN	7487.33	771.38	-3.27893	1.8264e-16	3.28203e-13	12.4839
LMOD1	18.2	1.97	-3.21066	0.000290895	0.0143873	1.84202
CSPG5	232.88	25.51	-3.19049	1.17396e-05	0.00122493	2.91189
TGFB2	469.71	53.09	-3.1453	3.31019e-12	2.32764e-09	8.63308
ANLN	56.68	6.53	-3.11789	2.11025e-06	0.000284409	3.54606
BEX1	178.55	21.17	-3.07596	1.58126e-05	0.00154858	2.81007
DIAPH3	22.09	2.65	-3.0607	0.000635651	0.0258301	1.58787
MARCHF4	258.85	32.53	-2.99245	9.81518e-10	3.45089e-07	6.46207
SLC28A3	20.63	2.67	-2.95085	0.000441462	0.0196752	1.70608
NTM	221.14	28.95	-2.93341	1.11141e-08	2.94669e-06	5.53067
LOC100653049	22.29	2.93	-2.92842	0.00136371	0.0458758	1.33842
CCN1	21105.7	2773.73	-2.92774	9.02382e-14	1.12263e-10	9.94976
GDF6	232.85	31.01	-2.90838	2.99545e-19	9.68907e-16	15.0137
KIF23	54.89	7.91	-2.79552	1.1914e-07	2.40856e-05	4.61824
DLC1	982.18	144.74	-2.76255	1.0095e-12	9.07036e-10	9.04238
ADAMTS1	3625.43	553.25	-2.71215	1.15267e-07	2.35976e-05	4.62713
ENC1	3047.53	470.87	-2.69424	4.04016e-10	1.67543e-07	6.77587
ESM1	1039.86	169.17	-2.61983	1.0871e-16	2.1977e-13	12.658
PDCD1LG2	2220.47	366.88	-2.59749	2.34315e-13	2.52638e-10	9.5975
COL11A1	415.79	69.37	-2.58347	0.000452046	0.0198837	1.7015
BIRC5	35	5.88	-2.57248	0.000135632	0.00821563	2.08536
F2R	82.57	14.27	-2.53245	1.21558e-06	0.000180363	3.74385
NCAPG	39.35	6.88	-2.51582	0.000265453	0.013502	1.8696
KRT7	360.16	64.19	-2.48831	1.07629e-07	2.29987e-05	4.6383
CACNB4	22.18	3.97	-2.48146	0.000465737	0.0202483	1.69361
KRTAP2-3	27.16	4.96	-2.45269	0.000156961	0.00923102	2.03475
TPM1	13468.5	2529.57	-2.41263	1.97771e-15	3.19855e-12	11.495
VGLL3	623.52	117.56	-2.40707	1.67398e-08	4.16512e-06	5.38037
CDC42EP3	306.77	58.81	-2.38307	1.5553e-12	1.25769e-09	8.90042
LMCD1	2564.09	497.73	-2.36501	1.15317e-05	0.00121105	2.91684
APLN	310.69	60.48	-2.36094	9.8614e-05	0.00648327	2.18821
NRG1	1096.06	214.63	-2.35243	1.27181e-05	0.00131012	2.88269
MYB	38.44	7.58	-2.3429	0.000894432	0.0336189	1.47342
NEXN	302.39	60.03	-2.33267	2.82393e-10	1.3049e-07	6.88442
FBN1	15188.8	3042.69	-2.31959	1.29039e-09	4.3403e-07	6.36248
THSD4	192.86	38.83	-2.31232	0.000557951	0.0233776	1.6312
KIRREL3	227.7	47.75	-2.25363	7.62555e-09	2.12634e-06	5.67237
RRM2	101.79	21.64	-2.23397	0.00124146	0.0430098	1.36643
STC2	13602.6	2937.5	-2.21122	1.46343e-11	8.45286e-09	8.073
FMN2	66.69	14.42	-2.20931	0.000189378	0.0106893	1.97105
RAB3B	634.29	137.45	-2.20627	6.7981e-07	0.000108857	3.96314
CCIN	64.29	13.94	-2.2057	6.84451e-06	0.000796376	3.09888
CLDN11	864.15	192.8	-2.16417	1.20631e-08	3.14672e-06	5.50214
LAYN	624.97	140.63	-2.15188	4.41888e-15	6.49696e-12	11.1873
NEDD4	938.44	217.51	-2.10922	3.14362e-05	0.00263429	2.57934
C6orf132	367.07	86.07	-2.09254	5.84445e-08	1.35032e-05	4.86956
ALPK2	543.3	130.35	-2.05937	7.23327e-06	0.000829672	3.08109
MPP4	63.75	15.3	-2.05929	0.000485071	0.0208645	1.68059
CCDC3	90.87	22.11	-2.0391	6.41668e-09	1.82065e-06	5.73977
TPD52	47.71	11.62	-2.03748	0.000116833	0.00743911	2.12848
UHRF1	102.98	25.41	-2.0188	0.000436642	0.0196161	1.70739
FRMD6	7245.34	1809.75	-2.00126	1.75809e-05	0.00167256	2.77662
SLC8A1	411.55	103.35	-1.99356	3.0596e-06	0.0004023	3.39545
BNC1	220.92	55.89	-1.98296	1.98531e-08	4.86491e-06	5.31293
WWC1	133.01	33.77	-1.97759	2.87721e-05	0.00244911	2.61099
ARHGAP18	281.94	71.73	-1.97483	1.50922e-05	0.00148833	2.8273
GREM1	13713.2	3553.65	-1.9482	5.38177e-05	0.00393843	2.40468
LOX	9416.58	2459.47	-1.93685	4.52384e-06	0.00055742	3.25382
PTPRF	903.96	239.41	-1.91679	0.000690891	0.0272531	1.56458
GDNF	855.88	231.52	-1.88626	4.95573e-09	1.51225e-06	5.82038
AMOTL2	2812.76	769.04	-1.87086	5.29805e-10	2.04013e-07	6.69034
CRIM1	3407.8	931.94	-1.87052	1.70363e-05	0.00164004	2.78514
PDZD2	186.96	51.95	-1.84767	0.000279475	0.0139505	1.85541
TGFA	393.65	110.18	-1.83703	0.00030121	0.0148069	1.82954
SEMA7A	2661.34	752.26	-1.82286	0.000987852	0.0364761	1.43799
BMPER	129.54	36.96	-1.8095	2.62042e-05	0.00224233	2.6493
AMIGO2	2232.05	638.56	-1.80547	1.37477e-05	0.001381	2.85981
UBASH3B	358.14	102.62	-1.80318	6.13622e-08	1.39776e-05	4.85457
MICAL2	2120.86	611.75	-1.79363	8.15932e-05	0.00559155	2.25247
CNN2	2690.36	781.48	-1.78351	1.07414e-08	2.89535e-06	5.5383
NTNG1	74.03	21.6	-1.77682	7.53479e-05	0.00523005	2.28149
ARPC5	2719.99	801.01	-1.7637	2.38385e-14	3.21283e-11	10.4931
SEPTIN11	3260.7	963.06	-1.75949	1.61364e-06	0.000229097	3.63998
SERPINE1	87562.6	26183.5	-1.74165	6.88055e-07	0.000109097	3.96219
AOX1	427.17	127.98	-1.7389	7.77342e-12	5.02878e-09	8.29854
WWTR1	1265.87	391.38	-1.69349	3.37708e-07	6.00193e-05	4.22171
STMN1	507.31	156.93	-1.69276	2.40338e-05	0.00208073	2.68178
PCDH9	313.7	97.29	-1.68909	1.45881e-07	2.84257e-05	4.54629
SDC1	3443.55	1068.1	-1.68885	1.62902e-06	0.000229097	3.63998
SH3PXD2A	5057.5	1596.91	-1.66314	1.70624e-06	0.000235854	3.62736
ACTC1	115.51	36.83	-1.64908	0.00066034	0.0265832	1.57539
FLNB	2777.53	887.07	-1.64668	4.55063e-05	0.00356712	2.44768
ABCC1	5549.86	1775.13	-1.64452	5.78438e-09	1.67055e-06	5.77714
E2F1	61.01	19.57	-1.6406	0.000128041	0.00793416	2.1005
KCNQ3	120.48	38.67	-1.63966	9.64121e-05	0.00641305	2.19294
RECK	1032.31	331.52	-1.63872	4.70828e-05	0.00359184	2.44468
FLNC	3230.49	1044.24	-1.6293	6.18601e-07	0.000101057	3.99543
PRKD1	264.29	85.49	-1.62825	2.00416e-05	0.00181914	2.74013
TBC1D2	476.46	154.36	-1.62604	2.27606e-08	5.41333e-06	5.26654
SVEP1	426.07	138.26	-1.62367	4.80684e-05	0.00363276	2.43976
PLCXD1	63.66	21.19	-1.58741	0.000266606	0.0135167	1.86913
UCK2	1576.39	528.49	-1.57668	4.96475e-10	2.00737e-07	6.69737
IRX3	335.89	112.85	-1.57358	1.94012e-07	3.73541e-05	4.42766
LRRC2	53.98	18.15	-1.57234	0.000431343	0.0195534	1.70878
PDZK1IP1	152.92	51.46	-1.57113	0.000171165	0.00988662	2.00495
MFAP3L	247.03	83.16	-1.57072	1.02355e-07	2.23701e-05	4.65033
FILIP1L	906.01	308.46	-1.55445	4.64614e-05	0.00357565	2.44664
FSTL3	7214.07	2468.96	-1.54691	0.000210083	0.0113635	1.94449
AMZ1	83.88	28.89	-1.53776	9.78182e-05	0.0064572	2.18996
RUNX1T1	78.9	27.35	-1.52878	0.000214549	0.0115279	1.93825
TYMS	124.08	43.62	-1.50836	0.000192465	0.0107707	1.96776
SMURF2	2525.72	894.07	-1.49823	2.0722e-05	0.00186187	2.73005
SLC22A2	319.96	113.28	-1.49805	6.74362e-05	0.00482586	2.31642
SLC4A4	65.13	23.06	-1.49786	0.000363138	0.0168765	1.77272
TLN2	289.17	102.53	-1.49591	0.000152861	0.00905577	2.04307
TGFBR2	4667.04	1663.69	-1.48813	3.65433e-07	6.42407e-05	4.19219
ZNF469	375.07	133.87	-1.48628	3.60424e-05	0.00295895	2.52886
CLIC3	528.19	192.33	-1.45746	0.00131901	0.0448649	1.34809
IGFBP3	61327.3	22359.7	-1.45563	7.2545e-07	0.00011391	3.94344
SLIT2	1435.36	525.1	-1.45076	0.000325394	0.0154782	1.81028
DDAH1	976.15	357.28	-1.45007	0.000324745	0.0154782	1.81028
ATP1B1	218.33	80.95	-1.43137	0.000101088	0.00661899	2.17921
FOSB	133.69	49.78	-1.42521	0.000645943	0.0261171	1.58308
CNN3	3344.21	1248.88	-1.42103	3.10447e-07	5.64141e-05	4.24861
RAP1GAP2	61.54	23.02	-1.41854	0.000456303	0.0199454	1.70016
APBB2	1397.17	526.39	-1.4083	0.000107872	0.00695065	2.15797
PLAT	1293.89	488.17	-1.40626	0.000960048	0.0356121	1.4484
RPS6KA2	1910.36	723.81	-1.40016	2.99002e-05	0.00253182	2.59657
CACNA1C	402.96	153.6	-1.39147	0.000279292	0.0139505	1.85541
RNF152	290.2	110.71	-1.39031	3.68229e-06	0.00047643	3.322
TUFT1	734.59	281.95	-1.3815	1.61593e-06	0.000229097	3.63998
FOXM1	198.93	76.62	-1.37654	5.77709e-07	9.53397e-05	4.02073
ABLIM3	3014.02	1172.04	-1.36266	5.14983e-10	2.03142e-07	6.6922
ERCC2	818.35	320.63	-1.35183	2.17072e-10	1.03256e-07	6.98608
P4HA2	9826.27	3857.22	-1.34908	0.00140109	0.0464339	1.33316
DOCK2	68.95	27.1	-1.34743	0.00112288	0.0401779	1.39601
GCNT1	694.95	273.66	-1.34454	5.9798e-06	0.00071638	3.14486
CAP2	376.66	148.62	-1.34168	0.000204429	0.0111697	1.95196
RFLNB	127.71	50.52	-1.3379	0.000102	0.00665178	2.17706
VCAN	6469.2	2570.58	-1.33149	8.25138e-07	0.000127095	3.89587
ERRFI1	631.04	250.88	-1.3307	0.000198436	0.0109175	1.96187
TPX2	96.96	38.76	-1.32276	0.00033911	0.0160363	1.79489
GLI2	78.33	31.52	-1.31318	0.000495266	0.0212465	1.67271
LOXL4	767.78	309.26	-1.31189	1.99025e-05	0.00181855	2.74027
SLC46A3	145.38	58.59	-1.31094	0.000251756	0.0130502	1.88438
EPHA2	164.48	66.47	-1.30722	0.000571401	0.023635	1.62645
NCEH1	949.6	384.3	-1.30509	2.86348e-09	9.0806e-07	6.04189
SLC16A2	1337.72	542.87	-1.3011	4.74708e-05	0.00360444	2.44316
ALDH1A3	2354.47	959.87	-1.2945	2.88794e-07	5.36859e-05	4.27014
FSTL1	47338.5	19547	-1.27606	0.000453188	0.0198837	1.7015
ADAMTSL1	471.84	195.48	-1.27126	1.02528e-05	0.00109091	2.96221
FSCN1	1528.58	634.85	-1.26771	4.1517e-05	0.00335728	2.47401
SULF1	29786.8	12500.7	-1.25266	0.000673489	0.0267895	1.57204
NAV3	406.11	170.71	-1.25035	0.000237078	0.0124086	1.90628
ADGRL4	1068.8	450.67	-1.24585	4.54717e-05	0.00356712	2.44768
C2CD2	407.66	172.76	-1.23856	1.08075e-07	2.29987e-05	4.6383
SLC22A3	1026.57	435.09	-1.23843	1.33968e-05	0.00135416	2.86833
CLDN14	624.76	265.86	-1.23267	0.00107667	0.0386955	1.41234
LHFPL6	3145.72	1343.84	-1.22703	5.03129e-11	2.62487e-08	7.58089
KCTD11	2161.16	925.58	-1.22337	7.32082e-05	0.00510343	2.29214
CCBE1	884.64	379.58	-1.22071	0.000472722	0.0204969	1.68831
TANC2	600.95	258.11	-1.21923	0.000533951	0.0225472	1.64691
POLR1G	201.49	87.22	-1.20793	3.33024e-07	5.98444e-05	4.22298
CPD	1974.04	863.25	-1.1933	9.25612e-06	0.00101836	2.9921
PPP1R13L	1195.38	522.94	-1.19276	4.96363e-05	0.00371957	2.42951
PAQR7	476.31	208.95	-1.18874	2.29913e-05	0.00203956	2.69046
KCTD12	877.59	385.62	-1.18636	0.00118898	0.0419857	1.3769
COTL1	2087.28	918.35	-1.18452	3.31754e-11	1.78848e-08	7.74751
MAP3K7CL	135.53	60.04	-1.17464	0.00103623	0.0378306	1.42216
NUAK1	334.38	149.45	-1.1618	6.82958e-05	0.00484451	2.31475
P3H1	1900.7	852.22	-1.15724	6.44929e-05	0.00465641	2.33195
INPP4B	78.39	35.22	-1.154	0.00117893	0.0417624	1.37921
PALLD	2709.57	1220.58	-1.1505	0.000862509	0.0326683	1.48587
FGD4	97.69	44.16	-1.14546	0.000665261	0.0266319	1.5746
KITLG	164.98	74.61	-1.14489	0.00122201	0.042871	1.36784
DOK5	316.04	144.03	-1.13379	3.06182e-05	0.0025791	2.58853
POU2F2	1507.4	695.34	-1.11627	5.36658e-05	0.00393843	2.40468
SHQ1	174.01	80.4	-1.11387	5.09943e-06	0.000615471	3.21079
CALHM5	347.3	160.53	-1.11335	0.000668346	0.0266893	1.57366
SIPA1L3	591.93	275.26	-1.10461	0.000197875	0.0109175	1.96187
PHLDB2	675.59	315	-1.10078	0.000346495	0.0163378	1.78681
HBEGF	476.54	222.61	-1.09808	0.00020519	0.0111736	1.95181
PODXL	848.9	398.22	-1.09202	0.00136439	0.0458758	1.33842
EBF3	408.34	191.73	-1.09068	0.000563748	0.0234383	1.63007
CREB3L1	1937.64	910.48	-1.0896	0.000126483	0.00792874	2.1008
GATA6	202.49	95.29	-1.08752	0.000398128	0.0182924	1.73773
TES	1403.88	662.62	-1.08316	0.000692744	0.0272597	1.56448
SCRN1	2168.68	1025.17	-1.08096	0.000255252	0.0131471	1.88117
DIPK1A	577.98	273.63	-1.0788	2.18777e-07	4.16269e-05	4.38063
HACD1	355.07	168.29	-1.07719	2.01339e-05	0.00181914	2.74013
ABHD5	1032.16	489.98	-1.07486	9.97036e-07	0.000150701	3.82188
EHD3	237.37	113.5	-1.06447	0.000198464	0.0109175	1.96187
RBMS3	304.95	147.16	-1.05119	0.000718945	0.0282221	1.54941
PYROXD2	155.23	75.41	-1.04166	5.33903e-05	0.00393843	2.40468
MORC4	151.28	73.97	-1.03221	0.000189688	0.0106893	1.97105
SYDE1	1359.65	665.87	-1.02991	0.000227965	0.0120486	1.91906
TMEM35B	669.68	328.9	-1.02584	0.000644708	0.0261171	1.58308
ANKRD13A	865.74	425.34	-1.02531	0.0005631	0.0234383	1.63007
SH3D19	1157.37	569.55	-1.02297	4.66495e-05	0.00357565	2.44664
PHACTR2	504.92	249.37	-1.01777	0.000162484	0.00945271	2.02444
LMO7	969.29	478.88	-1.01728	1.45166e-05	0.00144035	2.84153
DAB2	3921.89	1939.71	-1.0157	0.000188254	0.0106893	1.97105
CTPS1	872.1	431.99	-1.0135	0.000386785	0.0178728	1.74781
WTIP	217.4	107.69	-1.01345	1.44524e-05	0.00144035	2.84153
CDV3	2383.71	1181.38	-1.01273	0.000321431	0.0154258	1.81175
LOC728392	306.19	153.19	-0.999104	0.000539541	0.0226649	1.64465
FHL2	1601.26	805.35	-0.991523	8.07733e-05	0.00555892	2.25501
LOXL1	1824.71	922.02	-0.984801	0.00148802	0.0489142	1.31057
SNX24	303.7	154.51	-0.974962	7.24859e-05	0.00508613	2.29361
GPR176	2728.12	1389.21	-0.97364	1.74756e-05	0.00167239	2.77666
RIN3	273.62	139.42	-0.972756	0.00124771	0.0430261	1.36627
GALNT5	1016.49	518.27	-0.971834	2.40584e-05	0.00208073	2.68178
AMOTL1	925.01	472.6	-0.968857	0.000476175	0.0205914	1.68631
CTIF	1187.68	613.67	-0.95262	3.98984e-06	0.000512124	3.29062
LOXL2	9378.69	4849.56	-0.951532	2.1392e-05	0.00191145	2.71864
GRK5	315.09	163.17	-0.949389	0.00118008	0.0417624	1.37921
HMOX1	22390.1	11614.5	-0.946932	6.77828e-05	0.0048293	2.31612
PTTG1IP	9394.89	4901.77	-0.938573	0.000679251	0.0268595	1.5709
NMT2	177.91	92.87	-0.937873	0.000674168	0.0267895	1.57204
MCM6	157.69	82.32	-0.93784	0.000895921	0.0336189	1.47342
NIPAL3	833.62	435.29	-0.937415	5.11919e-07	8.53533e-05	4.06878
CLTCL1	217.34	113.54	-0.936695	0.000177275	0.0101669	1.99281
RNASE4	241.68	126.61	-0.932723	0.00013068	0.00806674	2.0933
ZHX3	593	312.59	-0.923739	0.000217249	0.0116343	1.93426
CORO1C	3908.95	2064.68	-0.92086	0.000463448	0.0202031	1.69458
RRAS2	1256	666.12	-0.914987	0.000353206	0.0165098	1.78226
STEAP1	1349.25	715.72	-0.914683	4.65656e-05	0.00357565	2.44664
KCNK6	192.47	102.76	-0.905323	0.00022083	0.0117871	1.92859
SNAPC1	711.77	380.42	-0.903819	6.73968e-07	0.000108857	3.96314
RUSC2	2642.02	1436.04	-0.879542	0.000104293	0.006774	2.16915
SINHCAF	131.52	71.52	-0.878941	0.000618403	0.0251928	1.59872
IL12A	316.68	172.78	-0.874127	0.000191907	0.0107707	1.96776
GLIPR1	1579.07	862.65	-0.872236	0.000734384	0.0286889	1.54229
GLIPR2	532.42	291.94	-0.866914	1.66017e-06	0.000231465	3.63552
BLMH	342.37	188.78	-0.858852	1.78101e-05	0.00167647	2.7756
LTBP2	15844.4	8747.44	-0.857037	1.86524e-05	0.00172381	2.76351
USP54	196.56	108.52	-0.857033	0.00121907	0.0428609	1.36794
C12orf75	870.2	489.77	-0.829229	0.00106906	0.0385076	1.41445
EFCAB14	1536.2	866.06	-0.826837	0.000453663	0.0198837	1.7015
STING1	766.25	433.53	-0.821687	1.78293e-05	0.00167647	2.7756
DYNLL2	2192.78	1243.88	-0.81791	1.07979e-06	0.000161698	3.7913
NFASC	1045.89	594.4	-0.815235	0.00134214	0.0453162	1.34375
CALD1	9780.46	5567.32	-0.812919	6.47803e-05	0.00465641	2.33195
VIM	41858	23869.5	-0.810336	0.000664173	0.0266319	1.5746
ALDH1B1	892.02	510.5	-0.805169	0.000406824	0.0185863	1.73081
KIFC3	867.54	503.96	-0.783625	0.00035173	0.0164937	1.78268
ACOX1	1133.57	660.52	-0.779192	0.00104235	0.0379682	1.42058
TP53I3	585.15	340.98	-0.779105	0.000618409	0.0251928	1.59872
CCDC80	11253.9	6561.63	-0.778302	0.000174147	0.0100231	1.999
MPZL1	7608.09	4452.93	-0.772779	0.000270244	0.0136158	1.86596
CACHD1	1152.04	678.09	-0.764636	6.56533e-06	0.000769428	3.11383
ODF2L	417.23	246.27	-0.760632	0.000613149	0.025105	1.60024
RRAD	938.65	554.45	-0.759535	3.43852e-05	0.00285185	2.54487
NEGR1	677.9	403.57	-0.748276	0.00123769	0.0430098	1.36643
HDAC7	1563.41	938.65	-0.736038	0.000316715	0.015336	1.81429
ARHGEF17	1283.51	776.7	-0.724658	0.000257788	0.0132355	1.87826
TRAM2	2708.6	1642.24	-0.721886	0.00100569	0.03705	1.43121
GALNT10	2031.09	1234.77	-0.71801	0.000499789	0.0213838	1.66991
CALM2	7420.53	4512.55	-0.717578	5.14881e-05	0.00383741	2.41596
RCC1	385.23	234.8	-0.714289	0.000294487	0.0145205	1.83802
RHOBTB2	260.85	159.04	-0.713818	0.00092963	0.034803	1.45838
CSF1	23404.9	14295.5	-0.711256	0.000289577	0.014366	1.84266
VOPP1	2250.42	1379.62	-0.705919	0.000132817	0.00813658	2.08956
WFS1	676.45	419.2	-0.690345	0.000188506	0.0106893	1.97105
RAD23B	2818.66	1747.27	-0.689906	0.00124515	0.0430261	1.36627
PFN2	1976.44	1232.52	-0.681299	0.000823157	0.0314726	1.50207
EPB41L1	1052.7	658.6	-0.676616	0.000110965	0.00712159	2.14742
PEA15	10081.2	6351.77	-0.666434	0.000318003	0.0153524	1.81382
CUL4B	1391.47	888.47	-0.647213	0.000116772	0.00743911	2.12848
TPM4	30945	20003.9	-0.629427	4.5128e-06	0.00055742	3.25382
GORASP2	1476.83	958.98	-0.622933	0.000431789	0.0195534	1.70878
FAM180A	1145.81	750.59	-0.610272	0.000677141	0.0268417	1.57119
DCBLD1	3929.41	2589.22	-0.601793	0.000932973	0.0348475	1.45783
PTX3	2783.08	1838.29	-0.598321	0.000337806	0.0160215	1.7953
H2AZ1	944.82	635.05	-0.573173	0.000966282	0.0357613	1.44659
SBDS	1747.3	1243.83	-0.490339	0.00074734	0.0291247	1.53574
UBE2E1	1540.93	2182.82	0.502396	0.000867815	0.0327925	1.48423
RFTN1	970.89	1387.23	0.514823	0.000434036	0.0195534	1.70878
GBP2	12237.6	17673.5	0.530269	0.000955336	0.0355187	1.44954
MARK3	1029.39	1494.01	0.537397	0.000770395	0.0298077	1.52567
PTPN2	650.27	960.18	0.56227	0.000351841	0.0164937	1.78268
CUL1	1466.11	2198.48	0.584518	0.00132556	0.0449439	1.34733
CREM	734.47	1111	0.597089	0.00129794	0.0444736	1.3519
HDAC1	774.08	1171.51	0.597819	0.00124192	0.0430098	1.36643
RHBDF2	1758.79	2673.05	0.603909	0.0012612	0.0433986	1.36252
ATG2A	663.59	1011.52	0.608155	0.000596279	0.0246011	1.60905
DOT1L	602.41	923.45	0.616282	0.00138925	0.0461834	1.33551
CD276	3859.79	6026.16	0.642716	0.000827534	0.0315653	1.50079
DMPK	488.17	762.98	0.644265	0.00124042	0.0430098	1.36643
GSDMD	1071.94	1697.5	0.663186	0.000482469	0.0208079	1.68177
SAT1	9307.22	14765.4	0.665801	0.000145413	0.00877527	2.05674
GDF15	361.57	574.05	0.66692	0.00132045	0.0448649	1.34809
ASAP3	931.86	1482.13	0.669488	0.00131513	0.0448649	1.34809
MOB3A	731.93	1167.27	0.673353	0.000566293	0.0234837	1.62923
NOTCH2NLA	620.3	989.78	0.674128	5.21494e-05	0.00386887	2.41242
PNRC1	3310.93	5311.58	0.681905	0.000303868	0.0148923	1.82704
ARHGEF2	1345.34	2185.87	0.700234	0.000601274	0.024744	1.60653
NFKBIA	3752.06	6125.01	0.707031	1.268e-06	0.000186431	3.72948
RGL1	918.62	1500.35	0.707758	0.00123728	0.0430098	1.36643
COQ8B	300.37	490.68	0.708029	0.00134165	0.0453162	1.34375
TBC1D16	1290.12	2116.74	0.714337	0.00044195	0.0196752	1.70608
NID2	958.11	1588.93	0.729795	0.0015054	0.0493852	1.3064
STK40	564.45	939.58	0.735158	4.56881e-05	0.00356712	2.44768
RNF144B	430.8	720.25	0.741491	0.00130997	0.0447909	1.34881
FAM20C	2638.53	4413.66	0.742239	0.0001511	0.00898433	2.04651
BDKRB2	3070.43	5138.74	0.742976	1.83261e-05	0.00171322	2.76619
DUSP5	1595.03	2682.31	0.749896	1.37116e-06	0.000199781	3.69944
ARHGEF3	205.43	348.53	0.762639	0.000285957	0.0142301	1.84679
TOMM40L	415.72	705.75	0.763548	1.86165e-05	0.00172381	2.76351
DLX4	125.6	214.34	0.771051	0.00083221	0.031599	1.50033
RFFL	302.75	521.83	0.785438	0.00106218	0.0384308	1.41532
IL15RA	5157.13	8950.21	0.795353	1.32722e-05	0.00135001	2.86966
BCL3	792.03	1383.39	0.804576	0.00104946	0.0381413	1.4186
TSPAN14	459.85	807.25	0.811864	0.000806468	0.0310412	1.50806
GK	1626.87	2864.03	0.815943	0.00040513	0.0185614	1.73139
MEIS1	266.81	471.16	0.820405	0.000269211	0.0136061	1.86627
RSPO3	1747.9	3093.05	0.823409	0.000155872	0.00920041	2.03619
GSDME	1086.31	1938.89	0.835791	7.81354e-06	0.000889918	3.05065
HCK	1268.2	2273.14	0.8419	0.000134955	0.00821563	2.08536
IFNGR2	1557.28	2803.52	0.848209	6.15027e-10	2.26064e-07	6.64577
BTBD11	410.97	740.39	0.849246	0.00025482	0.0131471	1.88117
AGRN	4952.31	8982.73	0.859052	0.000126193	0.00792874	2.1008
ARID5A	664.17	1220.24	0.877545	0.000442822	0.0196752	1.70608
FLOT2	1175.46	2177.5	0.889452	0.000222959	0.0118615	1.92586
FBXO33	156.68	293.91	0.907597	0.000170523	0.00988486	2.00503
TNFAIP2	14069	26468.7	0.911769	0.000240671	0.012556	1.90115
SRGN	4709.58	9000.12	0.934347	0.000147009	0.0088228	2.05439
LARGE1	782.09	1502.75	0.942199	3.98066e-07	6.77676e-05	4.16898
SERINC2	351.08	678.58	0.950726	7.25838e-05	0.00508613	2.29361
KLHDC7B	174.32	337.25	0.952131	0.000390436	0.0179901	1.74497
CPT1B	223.68	433.03	0.953057	3.28624e-05	0.00273961	2.56231
STX1A	195.15	382.18	0.969686	0.000224445	0.0119015	1.9244
VAV3	86.08	168.6	0.969854	0.000762229	0.0296335	1.52822
SLC7A5	8827.6	17304.8	0.97108	0.000364336	0.0168837	1.77253
NINJ1	7082.02	13914.2	0.974326	3.97607e-05	0.00324645	2.48859
MAFB	1234.68	2431.18	0.97752	4.9677e-05	0.00371957	2.42951
WHRN	326.31	646.69	0.986822	0.000131448	0.00808332	2.09241
SSTR2	456.99	914.15	1.00027	2.3078e-05	0.00203956	2.69046
CKB	276.85	555.42	1.00448	1.58946e-05	0.00154858	2.81007
CXCL10	40849.3	82019.6	1.00566	2.63136e-07	4.94849e-05	4.30553
BID	435.42	874.27	1.00566	8.65392e-05	0.00588067	2.23057
MICALL2	504.71	1019	1.01362	0.00020611	0.011186	1.95133
TFPI2	31171	63083.9	1.01707	7.82501e-05	0.00540829	2.26694
NMI	1368.19	2776.89	1.0212	9.62561e-06	0.00104793	2.97967
SQOR	3812.52	7814.75	1.03545	4.58765e-05	0.00356712	2.44768
GPC4	397.17	815.79	1.03844	0.000537512	0.0226385	1.64515
GEM	544.36	1120.67	1.04173	0.000509593	0.0217458	1.66262
CH25H	2141.32	4455.83	1.05719	0.00113892	0.0406619	1.39081
TNFAIP6	33740.2	70269.3	1.05843	5.92426e-10	2.22821e-07	6.65204
EIF5A2	44.88	93.63	1.06074	0.000808036	0.0310412	1.50806
HLA-DOB	128.95	269.31	1.06244	0.000562438	0.0234383	1.63007
FAM118A	187.08	392.5	1.06906	0.000261487	0.013383	1.87345
SLC43A2	1642.12	3494.33	1.08946	1.62291e-08	4.10115e-06	5.38709
DGAT2	75.11	159.96	1.09059	0.000147838	0.0088228	2.05439
ALDH1A2	49.27	105.13	1.09343	0.00107998	0.0387284	1.41197
C4B	179.8	386.84	1.10536	0.00019957	0.0109412	1.96094
APOE	104.02	226.1	1.12008	0.000233863	0.0123201	1.90939
MT1M	2171.09	4745.32	1.12809	9.67529e-05	0.00641305	2.19294
CFB	35312.8	77400.4	1.13215	0.00106627	0.038493	1.41462
TWIST1	173.25	380.11	1.13359	1.07954e-05	0.00114114	2.94266
RASSF5	97.83	215.19	1.13728	0.000440214	0.0196752	1.70608
ITGA9	52.59	116.34	1.14544	0.00146336	0.0482997	1.31606
TGFB3	85.9	191.67	1.15792	0.000305224	0.0149136	1.82642
MT1F	1299.25	2937.57	1.17695	0.000127915	0.00793416	2.1005
CTSC	890.82	2016.64	1.17874	0.000818512	0.0313692	1.5035
BCL2A1	57.68	132.07	1.19513	1.2064e-05	0.00125071	2.90284
WDR86	41.84	95.86	1.19611	0.000278028	0.0139505	1.85541
PIM3	953.17	2236.15	1.23021	2.79773e-12	2.05671e-09	8.68683
FGF13	56.66	133.03	1.2314	8.60617e-05	0.0058729	2.23115
CD38	2169.46	5116.18	1.23773	0.00138854	0.0461834	1.33551
ABHD17C	126.48	305.34	1.27146	3.84071e-07	6.67912e-05	4.17528
MMP3	48931.1	118155	1.27186	6.36482e-06	0.000756899	3.12096
WNT9A	45.4	110.63	1.28479	0.000158157	0.00926766	2.03303
HLA-DRA	5135.09	12567.4	1.29123	0.000450602	0.0198837	1.7015
AQP9	178.32	438.95	1.2996	1.60879e-05	0.00155802	2.80743
JMJD7	25.26	63.06	1.31967	0.000725902	0.0284262	1.54628
NYAP1	133.25	332.64	1.31981	6.22897e-08	1.39918e-05	4.85413
RHOU	230.96	578.5	1.32467	1.78956e-06	0.000243215	3.61401
PTGER2	503.91	1270.62	1.33428	0.000952636	0.0354999	1.44977
ARHGAP28	440.8	1111.88	1.3348	9.39048e-05	0.00630175	2.20054
IL18R1	82.39	209.27	1.34482	0.00137613	0.0461747	1.3356
LRFN4	189.86	483.7	1.34919	7.26456e-05	0.00508613	2.29361
MEFV	295.29	760.01	1.3639	4.41223e-05	0.00351522	2.45405
FAM110B	236.75	616.73	1.38127	4.27842e-05	0.00344253	2.46312
NAPRT	52.65	138.28	1.39299	0.00129751	0.0444736	1.3519
SGMS1	521.65	1375.68	1.399	1.28231e-12	1.09152e-09	8.96197
CD300E	116.64	310.38	1.412	0.00139067	0.0461834	1.33551
TCF7	148.02	394.22	1.41316	1.315e-09	4.3403e-07	6.36248
PRDM6	59	157.13	1.41316	1.93514e-05	0.00177824	2.75001
NOD2	1133.27	3126.74	1.46417	4.54952e-06	0.00055742	3.25382
SLC1A2	66.96	185.42	1.46946	0.00021392	0.0115279	1.93825
HLA-DPB1	464.75	1298.26	1.48206	0.000161595	0.00943493	2.02526
PLA2G4A	1002.83	2806.56	1.48473	1.28933e-10	6.51637e-08	7.18599
ALDH2	1309.08	3670.02	1.48724	6.38081e-05	0.00462766	2.33464
SLC35F1	111.37	312.26	1.48738	1.30348e-05	0.00133426	2.87476
PC	174.09	490.75	1.49513	0.00148322	0.0488557	1.31108
PAPLN	50.86	143.63	1.49762	4.30946e-05	0.00345034	2.46214
CDH23	81.42	231.8	1.50948	9.53937e-05	0.00637522	2.19551
RBM47	61.21	175.04	1.51592	0.000419875	0.0191286	1.71832
ELOVL7	543.38	1568.22	1.52909	1.2653e-07	2.52638e-05	4.5975
GRB14	113.83	330.43	1.53742	0.000181752	0.0103869	1.98352
PDE4B	1221.9	3602.25	1.55977	2.48296e-05	0.002136	2.6704
CCRL2	53.58	158	1.56017	0.00102966	0.0376756	1.42394
PCBP3	60.72	183.45	1.59511	0.00012756	0.00793416	2.1005
PPL	196.61	599.07	1.60742	0.00102426	0.0375632	1.42524
EXOC3L4	16.56	50.61	1.61163	0.000452852	0.0198837	1.7015
DUSP8	31.46	96.28	1.61367	4.18728e-06	0.000524968	3.27987
SLC9A9	201.27	626.92	1.63916	0.000265481	0.013502	1.8696
ZNF385A	259.04	807.03	1.63948	0.000147375	0.0088228	2.05439
MT1X	1723.98	5393.71	1.64553	1.42584e-06	0.000205893	3.68636
LOC102723996	55.2	173.43	1.65167	0.000769965	0.0298077	1.52567
GRB7	21.14	66.97	1.6633	0.00151857	0.0497162	1.3035
RHBDL3	56.77	180.7	1.67038	0.00115423	0.0411176	1.38597
STX11	190.79	609.64	1.67596	8.73179e-07	0.000133226	3.87541
LCP2	78.71	256.35	1.70341	7.62383e-08	1.68904e-05	4.77236
FAM43A	138.95	458.41	1.72203	0.000324092	0.0154782	1.81028
CCR7	39.33	129.99	1.72479	4.59091e-06	0.000558262	3.25316
SERPINB7	506.96	1689.7	1.73684	0.00138532	0.0461834	1.33551
ADGRG1	191.7	640.75	1.74093	0.000525457	0.022305	1.6516
SLC6A2	16.9	59.06	1.80506	0.000123362	0.00779351	2.10827
MCAM	199.08	697.2	1.8082	9.65446e-06	0.00104793	2.97967
AKR1C1	5832.31	20524.9	1.81523	0.000319555	0.0153815	1.813
HR	62.81	221.5	1.81815	0.000107837	0.00695065	2.15797
RASD1	471.78	1665.4	1.81968	1.10033e-07	2.31113e-05	4.63618
ROR2	119.44	422.04	1.82108	0.00121345	0.0427562	1.369
MT1H	111.27	404.77	1.86299	8.78464e-05	0.00594452	2.22588
SNX10	143.55	526	1.87349	4.05079e-06	0.000515854	3.28747
TLR2	743.25	2815.38	1.92142	3.92383e-10	1.67e-07	6.77728
SOX5	92.36	350.05	1.92228	1.1407e-07	2.35976e-05	4.62713
RUNX3	59.17	225.33	1.92907	3.88879e-07	6.6908e-05	4.17452
CYP24A1	95.14	365.22	1.94059	0.00102156	0.0375495	1.4254
FER1L6	42.77	170.12	1.99188	0.00105678	0.0383214	1.41656
NEURL3	22.83	91.12	1.99708	9.81205e-06	0.00105093	2.97843
PTGDR	31.94	128.55	2.00909	0.000832324	0.031599	1.50033
TNF	19.35	79.06	2.03039	8.93334e-05	0.00601996	2.22041
KL	17.55	72.27	2.04185	0.000533272	0.0225472	1.64691
TFAP2A	28.8	118.75	2.04391	0.00036056	0.016805	1.77456
RPS6KA1	26.85	113.47	2.0792	1.77152e-06	0.000242804	3.61474
B3GNT5	16.92	72.13	2.09149	0.000120027	0.00761255	2.11847
IRF5	10	42.63	2.09162	0.00138482	0.0461834	1.33551
MT1A	49.06	209.12	2.09176	3.46635e-06	0.000452108	3.34476
TNFRSF18	7.95	34.23	2.10623	0.000193592	0.0107965	1.96672
IL23A	98.73	426.75	2.11188	0.000306363	0.0149241	1.82611
C3orf80	98.04	426.68	2.12175	0.00140734	0.0465459	1.33212
MT1G	1177.32	5225.94	2.15018	2.69222e-09	8.70825e-07	6.06007
RASL12	6.33	28.1	2.15152	0.00117992	0.0417624	1.37921
PDK4	21.7	96.7	2.1555	0.000783144	0.0302286	1.51958
MMP1	19853.6	88953.6	2.16365	1.21398e-11	7.32107e-09	8.13543
TNFRSF9	27.36	122.78	2.16601	4.16276e-06	0.000524968	3.27987
PRLR	79.86	363.41	2.1861	9.05733e-06	0.00100345	2.9985
MMP10	597.87	2840.87	2.24842	1.30578e-07	2.57542e-05	4.58915
NKD1	14.82	71.26	2.26533	8.59905e-06	0.000972535	3.01209
C3AR1	215.53	1041.21	2.27228	2.38596e-06	0.00031891	3.49633
DRD4	56.61	283.47	2.3242	0.000234699	0.012324	1.90925
SLC16A6	110.97	562.02	2.3405	0.000312303	0.0151678	1.81908
IL36RN	251.98	1320.81	2.39004	2.92171e-07	5.36963e-05	4.27006
NOS2	373.99	1988.88	2.41089	3.6007e-05	0.00295895	2.52886
IL24	12.97	72.09	2.47498	0.000877794	0.0330922	1.48027
DLX2	8.3	47.96	2.53094	9.05856e-06	0.00100345	2.9985
GIMAP8	25.09	145.97	2.54025	4.44731e-05	0.0035258	2.45274
GJB2	38.83	244.59	2.65521	2.81433e-08	6.59654e-06	5.18068
NOTUM	24.13	153.57	2.66993	5.18236e-09	1.5239e-06	5.81704
SLAMF7	160.64	1024.32	2.6728	1.04696e-16	2.1977e-13	12.658
KRT75	105.67	684.19	2.69488	1.3793e-31	2.23075e-27	26.6515
TNFSF18	7.58	52.43	2.78932	2.33897e-05	0.00205588	2.687
FZD10	12.8	89.46	2.80486	2.3943e-05	0.00208073	2.68178
WNT7B	4.69	32.84	2.80832	0.00123816	0.0430098	1.36643
SLCO4A1	44.1	317.11	2.84611	3.76169e-09	1.16996e-06	5.93183
PRL	25.01	183.48	2.87521	0.000521033	0.0221754	1.65413
MMP13	1020.53	7513.01	2.88007	7.76526e-07	0.000120757	3.91809
BMP7	5.95	44.81	2.91318	3.99458e-05	0.00324645	2.48859
GALNT9	19.03	156.06	3.03615	9.79343e-06	0.00105093	2.97843
HTR6	8.22	70.87	3.10758	6.98193e-06	0.000806562	3.09336
C2CD4B	22.67	213.73	3.23695	9.07013e-10	3.25981e-07	6.48681
IBSP	41.97	403.87	3.26641	8.92148e-06	0.00100199	2.99914
PLA2G4B	5.96	58.33	3.29137	0.000433077	0.0195534	1.70878
C2CD4A	18.74	200.76	3.42157	3.20572e-10	1.40125e-07	6.85349
IL36G	7	89.81	3.68122	4.49807e-07	7.57784e-05	4.12045
BHLHE22	4.32	65.71	3.92626	1.90673e-11	1.06336e-08	7.97332
IFNG	0.99	20.85	4.40109	0.000248494	0.0129225	1.88865
POU4F1	0.66	17.74	4.74054	0.000603739	0.0247824	1.60586
PPP1R1A	4.63	130.18	4.81375	7.77676e-09	2.13176e-06	5.67126
CLIC5	0.66	21.77	5.04235	0.000660758	0.0265832	1.57539
H2AC19	0	85.38	21.863	2.20994e-08	5.33454e-06	5.2729
SELENBP1	400.29	1011.35	1.33717	0.00153304	0.0500885	1.30026
PROSER2	53.39	23.24	-1.19996	0.00154214	0.0502844	1.29857
ALCAM	1629.47	643.54	-1.34031	0.00155866	0.050619	1.29569
ST13	1512.24	2326.59	0.621527	0.00155712	0.050619	1.29569
KLHL12	419.63	281.07	-0.578168	0.00157886	0.0511125	1.29147
TMEM43	2207.08	1443.43	-0.612637	0.00158018	0.0511125	1.29147
HSPG2	9150.36	5183.58	-0.819879	0.00160273	0.0517385	1.28619
KCND2	46.17	13.32	-1.79303	0.00161844	0.0521415	1.28282
PXN	3785.92	2382.74	-0.668024	0.00162414	0.0522211	1.28215
CASP1	461.32	289.19	-0.673784	0.001642	0.0526907	1.27827
EDNRA	499.27	1458.47	1.54657	0.00165424	0.0529781	1.2759
SEMA6D	47.73	182.15	1.93218	0.00166058	0.0529969	1.27575
AP1G2	194.66	326.17	0.744663	0.00166137	0.0529969	1.27575
EPG5	2261.53	1022.64	-1.145	0.00168028	0.0534944	1.27169
NMNAT2	29.78	9.28	-1.6826	0.00169169	0.0536464	1.27046
CIITA	1612.79	2928.12	0.860417	0.00169157	0.0536464	1.27046
TP53INP2	1502.06	2642.86	0.815161	0.00170669	0.0539106	1.26833
STPG1	157.81	86.93	-0.860202	0.00170406	0.0539106	1.26833
ACADS	88.15	184.33	1.06427	0.00171526	0.0540758	1.267
MYL9	5777.93	3521.94	-0.714182	0.00173231	0.0545071	1.26355
MFSD2A	585.28	990.87	0.759567	0.00176478	0.0554211	1.25633
LAMC3	3.31	18.64	2.49301	0.00177302	0.0554642	1.25599
CAV1	4352.79	2599.53	-0.743691	0.00177155	0.0554642	1.25599
PTPN1	1231.99	1706.69	0.470208	0.00178316	0.0556737	1.25435
NPTXR	390.87	586.51	0.585453	0.00178698	0.0556856	1.25426
AKR1B10	0.99	14.41	3.86242	0.00180468	0.0561291	1.25081
SCHIP1	338.15	189.36	-0.836561	0.00182543	0.0565569	1.24751
MAP1A	2806.7	3956.39	0.49531	0.00182269	0.0565569	1.24751
EHF	173.94	58.19	-1.57981	0.00183224	0.0566594	1.24673
CLSPN	121.35	210.96	0.797863	0.00185744	0.057329	1.24163
FGFR1	7748.01	5089.19	-0.606391	0.00187657	0.057809	1.238
RNF150	111.3	45.25	-1.29839	0.00188302	0.0578975	1.23734
G0S2	506.51	1837.92	1.85942	0.00189056	0.058019	1.23643
HLA-F	3396.34	6030.66	0.828337	0.00190233	0.0582695	1.23456
COL1A1	104288	53108.2	-0.973559	0.00192736	0.058695	1.2314
HMGB2	149.61	83.18	-0.846907	0.00192403	0.058695	1.2314
PPP1R3B	693.4	312.18	-1.15128	0.00192745	0.058695	1.2314
PRC1	92.95	48.15	-0.94892	0.00193073	0.058695	1.2314
KDELR3	339.14	158.93	-1.09355	0.00199468	0.0605254	1.21806
SLC3A2	3618.56	6482.85	0.841212	0.00200585	0.0606718	1.21701
WWC2	765.91	362.21	-1.08034	0.00200701	0.0606718	1.21701
COL12A1	1212.39	403.34	-1.58779	0.00203355	0.0609047	1.21535
DLX1	17.33	59.3	1.77504	0.00203299	0.0609047	1.21535
MARK1	142.28	335.88	1.23927	0.00202288	0.0609047	1.21535
MAP2K3	1624.12	1059.63	-0.616092	0.00202596	0.0609047	1.21535
IRS2	716.01	456.88	-0.64815	0.00203113	0.0609047	1.21535
DLK1	15.23	56.1	1.88072	0.00207646	0.0620751	1.20708
SLC25A29	93.57	171.66	0.8755	0.00212864	0.063407	1.19786
MEOX1	19.64	3.65	-2.4285	0.00212886	0.063407	1.19786
CBR1	895.57	1403.55	0.648196	0.00215533	0.06396	1.19409
WTAP	6449.29	10421.3	0.692317	0.00215179	0.06396	1.19409
ADGRG2	35.95	102.25	1.50815	0.00217285	0.0643617	1.19137
CDKN2A	132.59	269.76	1.02474	0.00218669	0.0644177	1.191
MAMDC4	65.34	142.84	1.12834	0.00218161	0.0644177	1.191
ATG16L2	362.2	576.56	0.670661	0.00218281	0.0644177	1.191
MT1E	7013.12	11896	0.762346	0.00219511	0.0645482	1.19012
XPO6	3201.13	2175.73	-0.55708	0.002201	0.0646041	1.18974
FGF1	107.62	38.93	-1.46714	0.00221292	0.0647454	1.18879
CPED1	1090.37	528.02	-1.04617	0.00221383	0.0647454	1.18879
CNN1	33.03	5.33	-2.63154	0.00222771	0.0650337	1.18686
FBXO32	2629.21	1768.38	-0.572196	0.00223763	0.0652056	1.18571
SRGAP1	1051.68	534.08	-0.977553	0.00224347	0.0652582	1.18536
IL1RN	4755.32	10623	1.15958	0.00225575	0.0654978	1.18377
RALGPS2	494.22	218.3	-1.17886	0.00228069	0.0661033	1.17978
PILRA	493.4	876.61	0.829169	0.00232029	0.0671115	1.1732
TMEM119	4520.62	9310.02	1.04226	0.00232378	0.0671115	1.1732
IRF4	70.88	182.67	1.36571	0.00234035	0.0674542	1.17099
VPS26A	717.39	1005.22	0.486691	0.00234398	0.0674542	1.17099
CTHRC1	3092.28	1340.37	-1.20604	0.00235362	0.0676111	1.16998
MARCKS	4983.92	3182.49	-0.647126	0.00236095	0.0677015	1.1694
DUSP7	456.93	282.87	-0.691845	0.0023669	0.067752	1.16908
BACE1	1610.57	1083.8	-0.571466	0.0023824	0.0680751	1.16701
SULT1C4	3.29	28.76	3.1261	0.00239934	0.0683179	1.16547
MYO1F	17.58	51.36	1.547	0.00239627	0.0683179	1.16547
TTC7A	1165.92	800.41	-0.542652	0.00242145	0.0688263	1.16225
CYTIP	4.27	27.53	2.68874	0.00242791	0.0688888	1.16185
TFEB	26.82	59.45	1.14827	0.00251286	0.0711743	1.14768
PGM2L1	415.95	774.93	0.897644	0.00256848	0.0723694	1.14044
MTFR1L	518.23	350.64	-0.56362	0.00256829	0.0723694	1.14044
YBX3	2337.55	3833.86	0.713801	0.00256506	0.0723694	1.14044
PTGER4	29.45	74.37	1.33632	0.00257648	0.0724247	1.14011
THY1	2514.18	1132.2	-1.15096	0.0025794	0.0724247	1.14011
KCTD9	1138.03	638.21	-0.834422	0.00260143	0.0729167	1.13717
RASGRP1	8.98	0.36	-4.65788	0.00261395	0.0731408	1.13584
KRT80	14.17	1.66	-3.09358	0.00264009	0.0736176	1.13302
HDAC9	65.95	22.28	-1.56598	0.00263905	0.0736176	1.13302
DMD	32.03	3.55	-3.17244	0.0026455	0.0736414	1.13288
NANOS1	22.42	73.47	1.71256	0.00267689	0.0743872	1.1285
FOXD1	303.78	119.8	-1.34244	0.00268992	0.0746212	1.12714
ZWINT	86.37	36.91	-1.22628	0.00269845	0.0747296	1.12651
LRRC61	253.29	113.43	-1.15899	0.0027111	0.0749515	1.12522
PRMT6	275.52	182.26	-0.59615	0.00271647	0.0749717	1.1251
LEF1	31.79	145.55	2.19478	0.00276005	0.0759155	1.11967
ACTB	76637.4	45368.8	-0.756348	0.00275823	0.0759155	1.11967
MBP	71.32	134.41	0.914298	0.00278424	0.0764507	1.11662
ATG9B	20.65	2.66	-2.95644	0.00280643	0.0767992	1.11464
NOX4	327.44	167.46	-0.967414	0.00280316	0.0767992	1.11464
PANX2	155.72	251.53	0.691781	0.00282477	0.0771707	1.11255
GRIA1	14.58	2.31	-2.66044	0.00284326	0.0773256	1.11168
PLOD2	23517.8	12421.3	-0.920936	0.00284478	0.0773256	1.11168
BAG2	575.04	387.05	-0.57115	0.00284426	0.0773256	1.11168
HJURP	20.07	3.34	-2.5878	0.00286594	0.0777699	1.10919
RAB7B	42.87	114.26	1.41439	0.00287787	0.0778323	1.10884
CYTH3	506.23	285.83	-0.824613	0.00287607	0.0778323	1.10884
DNAH5	21.77	4	-2.44556	0.00288407	0.0778699	1.10863
CCDC184	29.98	9.99	-1.58556	0.00293913	0.0788663	1.10311
GINS2	21.64	5.29	-2.03193	0.00293378	0.0788663	1.10311
PIP4K2C	421.92	628.62	0.575217	0.00293017	0.0788663	1.10311
ABCC3	1234.73	1765.73	0.516064	0.00294048	0.0788663	1.10311
RARB	10.45	72.31	2.79044	0.0029462	0.0788889	1.10298
PHACTR1	148.68	242.95	0.708451	0.00299759	0.0801322	1.09619
GPR85	98.37	39.99	-1.29873	0.00301195	0.0803834	1.09483
HLA-DMB	346.76	880.36	1.34416	0.00301723	0.0803915	1.09479
PBK	19.01	3.33	-2.51237	0.00306121	0.0813976	1.08939
IKBKE	536.9	899.49	0.744467	0.00306506	0.0813976	1.08939
LUM	26426.2	41919.9	0.665668	0.00307737	0.0815908	1.08836
LRRC15	8997.44	4237.34	-1.08635	0.00308268	0.0815976	1.08832
TMSB4X	13221.9	9453.87	-0.483949	0.00309393	0.0817615	1.08745
COG2	191.17	321.48	0.749842	0.003107	0.0819732	1.08633
SH3BP1	57.4	104.81	0.868713	0.00314754	0.0829073	1.08141
SHCBP1	22	4.58	-2.26336	0.00315581	0.08299	1.08097
EFNA1	2.99	16.28	2.44502	0.00320056	0.083894	1.07627
INPP5F	370.37	219.14	-0.757117	0.00319617	0.083894	1.07627
ADGRE5	2422.47	3587.03	0.566313	0.00322096	0.0842921	1.07421
SLC25A12	760.87	1257.49	0.724825	0.00327183	0.0854852	1.06811
SPSB4	62.49	19.88	-1.65236	0.00328723	0.085749	1.06677
ACSL4	8443.73	14284.1	0.758458	0.00330966	0.0860565	1.06522
RGMB	1391.37	710.71	-0.969165	0.00330468	0.0860565	1.06522
ERBB2	725.59	500.51	-0.535775	0.00332571	0.0863209	1.06388
RELA	4270.69	6085.68	0.510949	0.00333051	0.0863209	1.06388
VILL	79.92	184.4	1.20617	0.00334732	0.086618	1.06239
PLXNC1	54.88	111.54	1.02302	0.00337609	0.0872229	1.05937
CTF1	220.6	128.4	-0.780809	0.00338238	0.0872459	1.05926
APCDD1	32.13	8.01	-2.0051	0.00339846	0.0875212	1.05789
CDH2	2234.74	1005.02	-1.15288	0.00346067	0.0880026	1.0555
MAPK14	924.88	646.49	-0.516628	0.00345996	0.0880026	1.0555
EPHB4	523.21	345.87	-0.597156	0.00345796	0.0880026	1.0555
ICOSLG	76.53	222.8	1.54169	0.00344566	0.0880026	1.0555
PNKD	508.23	737.91	0.537972	0.00345812	0.0880026	1.0555
IL26	3.28	22.52	2.78007	0.00343015	0.0880026	1.0555
SPSB2	49.13	93.15	0.922902	0.00342972	0.0880026	1.0555
GABBR2	28.95	1.01	-4.84324	0.00346068	0.0880026	1.0555
NCOA7	842.49	1473.78	0.806795	0.00348826	0.0885646	1.05274
LAMA5	324.63	889.18	1.45367	0.00350247	0.088647	1.05234
H2BC12	827.88	1906.31	1.20329	0.00350032	0.088647	1.05234
KCNN3	59.53	9.96	-2.57965	0.00350806	0.0886498	1.05232
BICDL2	16.02	2.67	-2.5848	0.00352209	0.0888656	1.05127
ETS1	2699.64	1145.16	-1.23722	0.00355601	0.0895815	1.04778
PTPRB	11.77	0.36	-5.0465	0.0035906	0.0903124	1.04425
AKAP12	828.78	393.65	-1.07407	0.00360884	0.09063	1.04273
INPP5K	361.01	557.5	0.626962	0.00362078	0.090789	1.04197
PKIA	121.72	66.47	-0.872734	0.00366552	0.0917685	1.03731
MERTK	9.98	49.86	2.321	0.00368647	0.0921504	1.0355
TMEM98	1495.67	1073.67	-0.47825	0.00369553	0.0922342	1.03511
GFRA1	824.57	324.29	-1.34634	0.00373059	0.0929142	1.03192
ARHGAP31	852.44	530.88	-0.683222	0.00373426	0.0929142	1.03192
LPL	2.33	15.12	2.69626	0.00379126	0.0941875	1.02601
WNK4	27.44	5.29	-2.37479	0.00380212	0.0943125	1.02543
CMKLR2	709.5	271.32	-1.38679	0.00381732	0.0943998	1.02503
CSRNP1	1457.33	2037.95	0.483795	0.00381156	0.0943998	1.02503
MICAL3	482.12	288.66	-0.740027	0.00383769	0.0947588	1.02338
CCDC113	47.54	19.77	-1.26542	0.00384948	0.0949049	1.02271
MKNK2	1360.42	2566.25	0.915604	0.00387857	0.0954765	1.0201
ZBTB7B	1305.66	1821.95	0.480703	0.0038849	0.095487	1.02006
HPS5	666.7	417.82	-0.674157	0.00394544	0.0967672	1.01427
KIAA0930	1985.82	3242.66	0.707443	0.00394895	0.0967672	1.01427
HERC5	523.83	1018.73	0.959586	0.00398149	0.097417	1.01137
PSMD2	7789.72	5517.92	-0.497448	0.00402022	0.098068	1.00847
TMEM237	1007.21	630.23	-0.676403	0.0040145	0.098068	1.00847
TSPYL4	388.24	239.22	-0.698577	0.00405037	0.098472	1.00669
STX3	274.54	418.83	0.609332	0.00405505	0.098472	1.00669
NUAK2	487.52	274.03	-0.831103	0.00404945	0.098472	1.00669
FUT8	1076.27	754.6	-0.512255	0.00406616	0.0985937	1.00615
STAP2	100.77	184.6	0.873403	0.00408894	0.0988496	1.00503
VCAM1	2792.99	4667.42	0.740818	0.00408503	0.0988496	1.00503
ATP2B1	2322.72	4528.55	0.963235	0.00410062	0.098984	1.00443
IPO5	6115.4	3015.34	-1.02012	0.00410702	0.0989909	1.0044
TOP2A	93.09	43.72	-1.09049	0.00412231	0.0992115	1.00344
CHRNA3	28.6	138.38	2.27438	0.00416857	0.100176	0.999237
NLRP10	11.67	0.66	-4.1475	0.00420804	0.100825	0.996433
RERE	1216.83	1774.88	0.544593	0.00420735	0.100825	0.996433
OXCT1	391.2	666.08	0.767813	0.00427151	0.102194	0.990575
FOSL2	5208.97	3041.89	-0.776029	0.00432846	0.103099	0.986746
ERC2	12.91	35.3	1.45132	0.00432511	0.103099	0.986746
MEAK7	615.94	357.07	-0.78657	0.00432624	0.103099	0.986746
TMEM64	257.84	131.36	-0.972918	0.00434166	0.10311	0.9867
COL5A3	241.28	727.3	1.59184	0.0043356	0.10311	0.9867
TK1	50.09	12.69	-1.98059	0.00436087	0.103414	0.985421
EPHB1	67.14	19.57	-1.77831	0.00440159	0.104227	0.98202
KCNK2	635.55	295.43	-1.10519	0.00443917	0.10481	0.979598
RSC1A1	37.76	11.51	-1.71374	0.00443449	0.10481	0.979598
ATF5	1919.77	3026.37	0.656657	0.00444877	0.104883	0.979294
CASTOR1	55.03	110.94	1.01151	0.00445797	0.104947	0.979029
RRM1	526.19	303.06	-0.795987	0.00449924	0.105765	0.975658
ZBTB17	401.38	593.78	0.564947	0.00452334	0.106177	0.973969
FMNL1	663.82	1191.74	0.8442	0.00456095	0.106905	0.971003
CLIC2	839.86	1266.48	0.592603	0.00457011	0.106964	0.970761
SSR3	3845.38	2211.81	-0.7979	0.00460101	0.107532	0.968462
CIT	531.39	226.42	-1.23075	0.00462799	0.108007	0.96655
GUCY1A1	9.63	36.67	1.92923	0.00465028	0.10837	0.96509
HLA-DQA1	919.27	2573.34	1.48507	0.00471426	0.109703	0.95978
ANTXR1	5722.34	3631.96	-0.655857	0.00473669	0.110067	0.958344
RNF19B	2503.3	3553.79	0.505527	0.00474863	0.110186	0.957874
BCL2	76.7	36.79	-1.05984	0.00476288	0.110358	0.957195
IFNAR2	959.65	1557.02	0.6982	0.00477055	0.110378	0.957119
PLCE1	73.27	33.47	-1.13048	0.00477876	0.11041	0.956992
ARAP2	47.41	121.56	1.35853	0.00483324	0.110834	0.955329
SYNE1	1761.29	997.13	-0.820772	0.00485581	0.110834	0.955329
HCCS	858.12	620.78	-0.467104	0.00485071	0.110834	0.955329
RHOB	2609.75	1541.27	-0.75979	0.00485878	0.110834	0.955329
L1CAM	43.54	131.13	1.59069	0.00483479	0.110834	0.955329
BICC1	1576.99	953.92	-0.725228	0.00484615	0.110834	0.955329
ABTB1	334.01	541.84	0.697994	0.00483578	0.110834	0.955329
RSAD2	6004.49	8944.88	0.57502	0.00483843	0.110834	0.955329
NREP	2620.43	1414.47	-0.889544	0.00485541	0.110834	0.955329
SH3BP5	583.43	1128.7	0.952033	0.00491475	0.111952	0.950966
CA12	24729.5	35985.6	0.541189	0.00493133	0.112172	0.950115
MYL12A	8156.89	5689.57	-0.519699	0.0049422	0.112262	0.949769
SSH3	131.33	215.52	0.714557	0.00497211	0.112783	0.947758
ARRDC3	1653.85	2591.91	0.648189	0.00498952	0.113019	0.946849
BMF	122.04	231.93	0.926339	0.00505062	0.114243	0.942171
ALAD	474.27	316.23	-0.584732	0.005086	0.114883	0.939746
PGF	194.47	632.92	1.7025	0.00514688	0.116096	0.935184
ADAMTS12	226.37	415.83	0.877293	0.00516794	0.116408	0.934016
OSBPL10	192.01	110.27	-0.800182	0.0051856	0.116644	0.933139
DHRS13	32.13	73.22	1.18836	0.00519511	0.116695	0.932947
HLA-DOA	409.15	918.71	1.16699	0.00520679	0.116795	0.932574
ZCCHC24	1954.68	2698.24	0.465085	0.00522795	0.116883	0.932248
GPR84	208.6	567.88	1.44485	0.00522722	0.116883	0.932248
RBM3	2926.09	1551.99	-0.914859	0.00523239	0.116883	0.932248
DYRK4	320.92	189.97	-0.756465	0.00523994	0.11689	0.932221
EIF1B	799.52	1276.23	0.674695	0.00530311	0.118137	0.927615
TTC26	126.93	74.66	-0.765512	0.00535618	0.119155	0.923888
ERO1A	5796.02	3984.95	-0.5405	0.00540265	0.120023	0.920734
PTPRN	664.2	1809.52	1.44592	0.00544893	0.120886	0.917625
ITGB8	1506.91	3319.65	1.13944	0.00565954	0.125386	0.901751
AKR1C2	3227.25	6877.56	1.09159	0.00573945	0.126809	0.89685
MSH2	228.79	125.03	-0.871745	0.00573585	0.126809	0.89685
MTURN	181.69	116.63	-0.63949	0.00578053	0.127542	0.894346
IKBIP	930.16	568.04	-0.71149	0.00580988	0.127935	0.893011
ZNF687	392.5	565.69	0.527312	0.00581414	0.127935	0.893011
SNED1	960.05	1285.34	0.420976	0.00583255	0.128166	0.892229
MYPN	168.83	104.58	-0.691026	0.00587257	0.12887	0.889849
MGLL	4979.52	3698.15	-0.429203	0.00596266	0.130141	0.885588
CPT1A	820.14	1288.37	0.651606	0.00595335	0.130141	0.885588
TSPAN13	56.46	20.56	-1.4572	0.0059543	0.130141	0.885588
LPXN	2371.27	1531.34	-0.630867	0.0059601	0.130141	0.885588
BCL2L11	174.84	325.52	0.896728	0.00601748	0.130983	0.882784
CERS6	497.4	321.27	-0.630629	0.00600953	0.130983	0.882784
PORCN	478.19	291.82	-0.712522	0.00610929	0.132803	0.876792
SAMD4A	1159.37	561.3	-1.0465	0.00614488	0.133219	0.875435
LGI2	507.6	1064.1	1.06786	0.00613667	0.133219	0.875435
NADK	1054.32	1624.14	0.623354	0.00616409	0.133456	0.874661
SGK1	1533.34	977.17	-0.649995	0.00625986	0.135349	0.868546
PIAS3	752.76	528.36	-0.510667	0.00628655	0.135574	0.867824
RCAN1	5289.83	2825.36	-0.904788	0.00628705	0.135574	0.867824
PCSK1	307.84	697.72	1.18046	0.0063508	0.136584	0.864599
PDK3	255.97	366.46	0.517647	0.0063451	0.136584	0.864599
TYMP	7956.26	17186.5	1.11111	0.0063666	0.136742	0.864097
TGFBR1	3538.02	1851.75	-0.934051	0.00639691	0.137211	0.86261
GADD45B	1421.85	804.1	-0.822317	0.00642363	0.137602	0.861376
RBPJ	5224.09	3202.86	-0.705821	0.00644343	0.137771	0.860843
NCALD	55.79	21.65	-1.36561	0.00644856	0.137771	0.860843
PDGFC	2558.54	1465.24	-0.804177	0.00645971	0.137827	0.860666
DUSP6	418.99	793.39	0.92113	0.00648709	0.138229	0.859401
NOTCH3	423.63	745.5	0.815403	0.00650448	0.138417	0.858811
BHLHE41	249.49	582.3	1.22275	0.00654387	0.139072	0.85676
PPP6R1	1224.01	1820.91	0.573043	0.00655715	0.139172	0.856449
COL5A1	12661.5	5202.05	-1.28329	0.00657153	0.139294	0.856067
STAT5A	777.27	1214.23	0.643561	0.0065802	0.139295	0.856064
NSMF	357.04	542.27	0.602903	0.00658964	0.139313	0.856009
APOL3	11378.4	20759.8	0.867495	0.00666146	0.140647	0.851869
FNDC10	241	147.95	-0.703949	0.00671368	0.141558	0.849066
FDXACB1	18.91	43.75	1.20993	0.00672209	0.141558	0.849066
ZFYVE26	657.64	936.05	0.509287	0.00673342	0.141612	0.8489
ACADVL	3740.69	6050.99	0.693868	0.00674588	0.14169	0.848661
MICB	642.84	1130.38	0.814275	0.00675973	0.141797	0.848334
DHFR	493.4	350.9	-0.491702	0.00679513	0.142354	0.846629
RBM17	626.11	907.52	0.535517	0.00682136	0.142719	0.845518
PPIF	2302.82	3712.3	0.688912	0.00684226	0.142971	0.844751
DDR1	1190.95	2102.52	0.820014	0.00688922	0.143582	0.842901
NTNG2	315.61	525.83	0.736436	0.00688672	0.143582	0.842901
PLCL1	48.88	22.31	-1.13179	0.00692698	0.143841	0.842117
FOCAD	312.03	454.78	0.543484	0.00691495	0.143841	0.842117
TRAF5	208.26	120.83	-0.785393	0.00692835	0.143841	0.842117
LMLN2	0.18	5.12	4.8547	0.00703211	0.145007	0.838611
HMGN1	1952.2	1368.36	-0.512655	0.00703831	0.145007	0.838611
GRAMD1A	2009.71	3281.97	0.707578	0.00703016	0.145007	0.838611
SCARB1	231.3	392.51	0.762956	0.00701012	0.145007	0.838611
ADAMTS2	9610.1	7275.42	-0.40152	0.00700275	0.145007	0.838611
ARHGEF10	334.68	162.7	-1.04051	0.00703061	0.145007	0.838611
CHKB	316.28	552.19	0.803943	0.00706234	0.14528	0.837795
TMEM123	1695.98	2355.24	0.473751	0.00707954	0.14528	0.837795
RBMS2	2089.18	1425.38	-0.551587	0.00708748	0.14528	0.837795
STC1	5616.47	1772.15	-1.66416	0.00707935	0.14528	0.837795
ADCY4	502.41	1004.27	0.999204	0.00712086	0.145779	0.836304
PHLPP1	148.31	88.34	-0.747504	0.00717163	0.1465	0.834162
TMEM233	105.23	264.34	1.32883	0.00717419	0.1465	0.834162
BMP2	6945.73	13120	0.91757	0.00720144	0.146871	0.833064
DNAJB4	681.04	484.45	-0.49139	0.00723207	0.147044	0.832552
ZNF277	175.1	274.85	0.650523	0.00723494	0.147044	0.832552
AGK	202.79	299.07	0.560547	0.00723719	0.147044	0.832552
CENPF	25.88	8.21	-1.65631	0.00727022	0.14716	0.832209
CHKA	123.04	191.09	0.635115	0.00726154	0.14716	0.832209
EMP2	1091.39	667.85	-0.708575	0.00725406	0.14716	0.832209
NAGPA	136.95	255.31	0.898655	0.00731687	0.14792	0.829974
GPRC5C	52.59	182.24	1.79294	0.00734226	0.148063	0.829554
VLDLR	391.2	186.15	-1.07141	0.00733481	0.148063	0.829554
OAS2	6389.48	8826.49	0.46614	0.00735524	0.14814	0.829328
ENGASE	351.79	489.51	0.476604	0.00737692	0.148392	0.82859
SHH	4.29	92.18	4.42573	0.00745389	0.149754	0.824622
ZNF704	28.19	6.34	-2.1533	0.00756538	0.151805	0.818714
WDR18	185.4	364.54	0.975419	0.00761286	0.152569	0.816535
CLDN23	523.25	830.91	0.667187	0.00764924	0.15273	0.816076
GTSE1	17.74	3.99	-2.15236	0.00764518	0.15273	0.816076
PLPP1	2204.02	1346.4	-0.711036	0.00764509	0.15273	0.816076
GPRIN1	152.62	244.25	0.678402	0.00767857	0.153126	0.81495
GNPNAT1	1867.13	1193.53	-0.645592	0.00771437	0.153651	0.813465
FBXW5	1396.57	2463.86	0.819033	0.00781495	0.155463	0.808374
CYB5A	575.16	323.7	-0.829323	0.00787037	0.156301	0.806038
CNTNAP4	2.94	27.13	3.20593	0.00787642	0.156301	0.806038
AKR1B1	19278.1	38784.4	1.00851	0.00789679	0.156322	0.805981
CHST10	111.79	61.43	-0.863759	0.00789521	0.156322	0.805981
DUSP3	2749.84	1762.08	-0.642068	0.00801601	0.158488	0.800004
VAMP1	132.56	251.26	0.922527	0.00803905	0.158555	0.799819
KMO	3	13.9	2.21345	0.00802957	0.158555	0.799819
FAM120AOS	539.3	783.98	0.539725	0.00810437	0.159649	0.796834
CDS1	30.44	8.02	-1.92342	0.00817253	0.160278	0.795127
ANG	60.71	32.2	-0.914603	0.00815677	0.160278	0.795127
EIF4E3	126.02	217.16	0.785126	0.00818582	0.160278	0.795127
INTS11	577.06	837.07	0.536624	0.00817885	0.160278	0.795127
PCED1B	77.67	33.04	-1.2332	0.00816538	0.160278	0.795127
ACP7	46	14.8	-1.63658	0.00821579	0.160282	0.795114
WBP1L	1607.09	2459.7	0.614028	0.00820607	0.160282	0.795114
AIFM2	1240.4	1750.41	0.496887	0.00821263	0.160282	0.795114
SKA2	362.76	251.34	-0.529366	0.00825207	0.160796	0.793725
RBM24	99.89	42.82	-1.22191	0.00828426	0.161229	0.792557
SH3GLB2	381.22	589.84	0.629696	0.00831658	0.161663	0.791388
BAG1	583.02	886.04	0.603829	0.00836436	0.162397	0.789422
ADGRA3	226.13	354.34	0.647984	0.00843876	0.163645	0.786097
SLC39A8	7364.24	12484.3	0.76151	0.0084709	0.164072	0.784966
BAIAP2	81.46	149.43	0.875206	0.0084978	0.164396	0.784109
POLR3B	131.89	77.79	-0.76174	0.00851006	0.164436	0.784002
AP5B1	1848.91	2524.14	0.44912	0.00852722	0.164571	0.783646
MCTP1	13.59	56.94	2.06711	0.00854579	0.164733	0.783219
RMI2	69	35.35	-0.96487	0.00860325	0.164816	0.783001
FOXO1	1010.1	2372.35	1.23182	0.00862142	0.164816	0.783001
SARM1	297.28	419.66	0.497399	0.00861034	0.164816	0.783001
MAFF	3509.16	2228.88	-0.654806	0.00856605	0.164816	0.783001
SH2D4A	1180.26	750.5	-0.653187	0.00858569	0.164816	0.783001
ACTN1	9071.95	5387.08	-0.751909	0.00861806	0.164816	0.783001
H2AW	41.48	19.52	-1.08756	0.00860439	0.164816	0.783001
NAP1L3	53.59	24.26	-1.14363	0.00868362	0.165809	0.780392
SLC1A3	274.23	118.41	-1.21156	0.00882918	0.168389	0.773685
AK1	950.72	1914.49	1.00987	0.00886111	0.168799	0.772629
TPRG1L	1073.85	774.8	-0.470885	0.00890264	0.169192	0.77162
IL4I1	834.54	1430.47	0.777443	0.00889867	0.169192	0.77162
NPHP1	52.36	24.28	-1.10862	0.00893063	0.169434	0.770998
TEK	256.25	87.52	-1.5498	0.00893635	0.169434	0.770998
TENM4	20.98	5.92	-1.82481	0.00896593	0.169796	0.770072
ENPP1	146.13	84.71	-0.786683	0.00899277	0.170105	0.769282
BET1	974.64	1327.39	0.44564	0.00901257	0.170106	0.769281
MEST	71.86	28.45	-1.33688	0.00901846	0.170106	0.769281
PRKAB2	621.53	360.57	-0.785521	0.00902434	0.170106	0.769281
MCFD2	7271.66	4654.1	-0.643783	0.00904824	0.170358	0.768638
STEAP2	1411.73	696.27	-1.01975	0.0090776	0.170712	0.767737
MAP3K8	321.44	510.82	0.668276	0.00911944	0.171101	0.766748
IFIH1	4900.88	6558.5	0.420325	0.00911726	0.171101	0.766748
ACAA2	1459.29	1951.41	0.419258	0.00914372	0.171253	0.766361
LAMC2	633.69	367.36	-0.786572	0.00914875	0.171253	0.766361
SMOX	731.39	1192.11	0.704801	0.00916289	0.17132	0.766193
LAMB3	2208.06	4539.71	1.03982	0.00918528	0.17154	0.765635
HES4	72.6	147.81	1.02566	0.00919589	0.17154	0.765635
VPS16	319.32	454.99	0.510835	0.00921252	0.171639	0.765383
CDK5RAP3	750.55	1078.14	0.522521	0.00922245	0.171639	0.765383
APBB1IP	814.15	1287	0.660633	0.00927419	0.172404	0.763453
MAGED4	515.53	311.35	-0.727516	0.00935197	0.17365	0.760325
TRIM2	170.26	346.88	1.02675	0.00940893	0.174139	0.759104
AK3	1300.61	1852.81	0.510524	0.00940876	0.174139	0.759104
PDLIM2	392.69	250.6	-0.648025	0.00941647	0.174139	0.759104
PITPNM1	701.97	1106.85	0.65699	0.00942136	0.174139	0.759104
CHI3L2	2263.8	3533.69	0.64243	0.00943508	0.174194	0.758968
TMEM164	437.48	620.75	0.504812	0.00944691	0.174213	0.758919
CNST	400.95	217.99	-0.879136	0.00949801	0.174956	0.757072
GASK1B	973.36	365.98	-1.41119	0.00956395	0.17597	0.754561
GXYLT2	137.79	79.96	-0.785065	0.00962511	0.176894	0.752287
A2M	27.14	66.73	1.29793	0.00968521	0.177352	0.751164
STS	674.77	437.38	-0.625497	0.00968077	0.177352	0.751164
TDO2	0.99	8.96	3.17644	0.00969388	0.177352	0.751164
MSC	2426.92	3389.17	0.481802	0.00966671	0.177352	0.751164
SYT7	202.5	388.88	0.941412	0.00974725	0.178127	0.74927
NEK10	40.8	16.4	-1.3149	0.00989002	0.180497	0.74353
ZSWIM6	383.18	201.02	-0.930736	0.00989927	0.180497	0.74353
TAS1R3	5.98	19.15	1.67985	0.00995667	0.181339	0.741508
MAP7D3	153.14	98.95	-0.630127	0.00998	0.18156	0.740981
SLC12A4	2339.07	1748.2	-0.420065	0.00999591	0.181645	0.740777
PSD	27.11	65.51	1.27312	0.0100563	0.182537	0.73865
TGFB1I1	1389.47	865.84	-0.682359	0.0100677	0.182538	0.738646
LIMA1	5718.69	3606.48	-0.665095	0.0101564	0.183941	0.735322
GADD45G	78.22	170.52	1.12442	0.0101821	0.183999	0.735186
HACD2	422.17	222.28	-0.925429	0.0101823	0.183999	0.735186
TUBB6	3502.32	2269.26	-0.626086	0.010223	0.184528	0.733939
RGPD1	12.99	39.28	1.59602	0.0102532	0.184866	0.733143
PLK1	21.92	7.66	-1.51658	0.0102968	0.185446	0.731783
IL6R	48.23	92.01	0.93186	0.0103669	0.1865	0.729321
EML5	5.96	26.3	2.1418	0.0104218	0.186864	0.728474
DPP7	1636.77	2434.5	0.572774	0.0104006	0.186864	0.728474
MYBL2	21.42	4.95	-2.11208	0.010419	0.186864	0.728474
FOXQ1	135.23	333.5	1.30231	0.0104777	0.187659	0.72663
TRIP13	44.34	18.78	-1.23913	0.0105153	0.188124	0.725556
MPRIP	909.15	1276.15	0.489205	0.0105417	0.188388	0.724947
HELLS	31.06	10.54	-1.55943	0.0105841	0.188936	0.723685
TNFSF11	1	11.57	3.53266	0.0106348	0.189633	0.722085
CHEK1	179.16	106.3	-0.75316	0.0106664	0.189778	0.721755
ZPLD1	54.84	12.62	-2.12005	0.0106588	0.189778	0.721755
TICRR	52.31	21.29	-1.29684	0.0106979	0.190129	0.720952
NCK1	748.92	1196.42	0.675837	0.0107617	0.191053	0.718847
SLC22A23	1247.88	2131.51	0.7724	0.0108328	0.192103	0.716465
MGAM	9.28	1	-3.20909	0.0109465	0.193908	0.712404
FN1	400656	240446	-0.736649	0.0109868	0.193984	0.712234
PDE4A	287.61	424.08	0.560227	0.0109836	0.193984	0.712234
JPT2	962.2	578.19	-0.734807	0.0109777	0.193984	0.712234
FRMD5	131.52	52.23	-1.33247	0.0110253	0.194452	0.711188
KCNJ6	33.42	5.16	-2.69405	0.011038	0.194463	0.711162
EOMES	4.62	23.92	2.372	0.0110591	0.194622	0.710807
PPFIBP2	223.19	415.72	0.897326	0.0110799	0.194777	0.710462
ABHD16A	1700.43	2579.56	0.601227	0.0110945	0.194822	0.710362
NEDD9	452.47	220.86	-1.0347	0.0111196	0.19504	0.709876
RRBP1	3721.76	2431.15	-0.614346	0.011131	0.19504	0.709876
AKTIP	178.85	119.76	-0.578665	0.0112082	0.196181	0.707344
N4BP3	53.96	108.76	1.01127	0.0112217	0.196203	0.707294
SCARA3	1991	4355.55	1.12936	0.0112729	0.196887	0.705783
IGSF9B	25.42	61.77	1.28093	0.011381	0.19856	0.702107
MTMR1	455.16	304.04	-0.582134	0.0114112	0.198872	0.701426
NT5E	13903.7	9738.73	-0.513668	0.0114284	0.198957	0.70124
ZFHX3	293.19	159.81	-0.875481	0.0114678	0.199428	0.700213
SCO2	690.7	1533.2	1.15042	0.0115402	0.200472	0.697945
CFAP251	238.73	111.93	-1.09277	0.0115604	0.200608	0.697651
HSPA1B	1127.68	1804.8	0.678482	0.0115973	0.201033	0.696732
FLRT2	2442.61	1411.42	-0.791283	0.0116551	0.201386	0.69597
KRT81	11.59	1.33	-3.12602	0.011654	0.201386	0.69597
ASS1	1247.5	2387.04	0.936176	0.011651	0.201386	0.69597
SPATA6	46.78	82.32	0.815316	0.0116965	0.201678	0.695341
ANXA8L1	19.56	4.3	-2.1839	0.0117037	0.201678	0.695341
EIF2B5	384.08	547.13	0.510476	0.0117094	0.201678	0.695341
FAM171A1	319.94	162.29	-0.979252	0.0117222	0.201685	0.695327
IL10RA	32.57	84.97	1.38338	0.0117443	0.20185	0.694971
ALDH16A1	423.77	846.52	0.998252	0.0117706	0.202087	0.694462
DHDDS	636.04	472.53	-0.428697	0.0117858	0.202134	0.694361
SEMA5A	738.94	342.26	-1.11036	0.0118468	0.202963	0.692582
NCAPH	21.04	4.88	-2.10875	0.0118696	0.20314	0.692204
CKAP4	11400.9	8555.07	-0.414296	0.0119198	0.203568	0.691291
TOP1MT	43.88	87.37	0.993449	0.0119102	0.203568	0.691291
CEP55	17.69	4.64	-1.93227	0.0119593	0.204027	0.690313
SLC7A14	10.29	0.99	-3.37726	0.0120469	0.205306	0.687599
FOXP2	15.31	41.02	1.42169	0.0120689	0.205463	0.687266
SGSM3	461.02	687.63	0.576809	0.0121696	0.20696	0.684114
FBLN7	261.72	135.39	-0.950826	0.0122246	0.207676	0.682613
CLDN1	322.93	116.05	-1.4765	0.0122589	0.20804	0.681852
TENM2	7.89	0.18	-5.46266	0.012309	0.208672	0.680536
EGR2	567.64	238.69	-1.24982	0.012343	0.208802	0.680266
EPDR1	1596.67	1149.34	-0.474252	0.0123554	0.208802	0.680266
FXR1	1022.51	1340.36	0.390502	0.0123298	0.208802	0.680266
USP13	255.17	359.6	0.494922	0.0124299	0.209842	0.678107
IER3IP1	859.47	1116.03	0.37686	0.0124642	0.209926	0.677933
PGM2	285.74	149.65	-0.933131	0.0124738	0.209926	0.677933
RPS6KA3	827.63	1237.43	0.580289	0.0124602	0.209926	0.677933
KHNYN	1054.2	1502.49	0.511202	0.0124987	0.210126	0.677521
CKAP2L	53.16	21.91	-1.27872	0.0125309	0.21035	0.677058
SPOCD1	744.12	432.57	-0.782598	0.012538	0.21035	0.677058
MYH10	141.64	76.45	-0.889592	0.012579	0.210818	0.676091
ST3GAL4	700.3	1242.01	0.826629	0.0126111	0.211139	0.675432
SP140	38.24	83.22	1.12174	0.0127145	0.212649	0.672337
PXDN	11102.2	6593.81	-0.751666	0.0127722	0.213393	0.67082
ANXA6	3748.36	2278.2	-0.718368	0.012791	0.213487	0.670629
HMMR	19.72	5.69	-1.79296	0.012813	0.213488	0.670627
ACTA2	1576.83	1081.47	-0.544037	0.0128175	0.213488	0.670627
SH3BP4	1451.67	968.6	-0.583742	0.0128401	0.213646	0.670306
EVC	1134.59	715.19	-0.665763	0.0128925	0.214076	0.669433
TCEAL9	2038.62	2826.58	0.471463	0.012892	0.214076	0.669433
NKX2-6	5.16	0.18	-4.86489	0.0129148	0.214206	0.669169
BBC3	248.11	351.93	0.504315	0.0129268	0.214206	0.669169
FRMPD4	42.71	12.6	-1.76082	0.0129497	0.214366	0.668845
TLE3	268.68	449.1	0.741153	0.013073	0.216186	0.665172
CITED2	802.81	433.92	-0.887646	0.0131249	0.216823	0.663895
SLC1A4	460.93	809.15	0.811874	0.0131567	0.216905	0.663731
MAGT1	1409.45	918.95	-0.617075	0.0131511	0.216905	0.663731
DLX3	82.86	264.13	1.67247	0.0132511	0.217966	0.66161
RAD9A	110.07	182.59	0.730246	0.0132615	0.217966	0.66161
ZYX	4902.07	3438.06	-0.511797	0.0132468	0.217966	0.66161
IRAK2	956.9	1766.32	0.884305	0.0133017	0.218146	0.661252
SCPEP1	5456.95	7611.16	0.48002	0.0132933	0.218146	0.661252
TCF19	67.06	29.63	-1.17846	0.013313	0.218146	0.661252
UNC5B	400.65	701.3	0.807681	0.0134038	0.21897	0.659615
OR1J2	23.49	4.99	-2.23491	0.0133787	0.21897	0.659615
ZNHIT6	456.35	330.44	-0.465753	0.0133933	0.21897	0.659615
GUCY1A2	24.5	9.59	-1.35336	0.0134594	0.219655	0.658259
HTATIP2	955.14	1511.44	0.662137	0.0134883	0.219737	0.658097
MCRIP2	68.99	143.81	1.05957	0.0134915	0.219737	0.658097
DHX58	932.06	1402.98	0.590004	0.0135421	0.220338	0.65691
SZRD1	4177.35	3232.56	-0.369909	0.0136162	0.220877	0.655849
EHD2	6284.2	4827.9	-0.380332	0.0136118	0.220877	0.655849
NFKB2	2989.84	4294.99	0.522587	0.0136071	0.220877	0.655849
ORC1	23.37	7.98	-1.55007	0.0136783	0.221663	0.654308
TPST2	441.61	603.72	0.451125	0.0137108	0.221967	0.653711
CDCA4	145.3	93.99	-0.628452	0.0137939	0.223089	0.651522
IRF7	695.16	1315.02	0.919677	0.0138734	0.224049	0.649657
TSPAN18	26.97	9.38	-1.52272	0.013881	0.224049	0.649657
ARSG	97.6	228.47	1.22701	0.0139265	0.22456	0.648668
RGMA	36.13	67.26	0.896571	0.0140374	0.226122	0.645656
PARD3B	104.65	62.7	-0.739107	0.0140728	0.226467	0.644996
ST6GALNAC4	520.12	1040.45	1.0003	0.0141154	0.226927	0.644114
MAPRE3	372.96	536.82	0.525406	0.0141868	0.227396	0.643217
FOXP1	1301.58	813.6	-0.677871	0.0141803	0.227396	0.643217
DMRTA1	10.89	29.17	1.42176	0.014181	0.227396	0.643217
PIK3R3	533.02	826.66	0.633085	0.0142062	0.227482	0.643053
GPCPD1	300.93	175.62	-0.776915	0.0142749	0.227905	0.642247
SLC2A9	32.97	12.49	-1.40093	0.0142657	0.227905	0.642247
XG	396.45	247.16	-0.681661	0.0142652	0.227905	0.642247
TXLNA	1660.88	1285.73	-0.369357	0.0144147	0.229683	0.638871
BCAS4	122.06	75.76	-0.688134	0.014409	0.229683	0.638871
ZDHHC14	183.36	283.41	0.628224	0.0144613	0.2302	0.637895
KRT19	6.31	0.35	-4.15365	0.0145211	0.230924	0.636531
DEAF1	453.72	679.05	0.581715	0.0145596	0.231214	0.635985
SMARCA4	882.38	1173.81	0.411733	0.014568	0.231214	0.635985
SMIM20	181.33	304.57	0.748133	0.0145969	0.231446	0.63555
SF3A3	903.26	665.16	-0.441446	0.014636	0.231828	0.634833
LATS2	1174.46	660.25	-0.830908	0.0146496	0.231828	0.634833
HYI	190	101.47	-0.904976	0.0146832	0.232133	0.634263
TSPAN1	31.39	74.26	1.24211	0.0147226	0.232301	0.63395
NR2F1	52.41	24	-1.12661	0.0147135	0.232301	0.63395
CBR3	554.09	1054.72	0.928662	0.014747	0.232459	0.633654
ASF1B	45.7	19.74	-1.21113	0.0147864	0.232626	0.633341
SDCBP	5415.1	8355.83	0.625796	0.014772	0.232626	0.633341
JAM3	842.64	548.08	-0.620536	0.0148513	0.233421	0.63186
TOR3A	174.26	261.82	0.58737	0.0148882	0.233774	0.631205
IQGAP3	21.09	5.66	-1.89829	0.0149222	0.23408	0.630636
CPN2	45.57	13.17	-1.79079	0.0149372	0.234089	0.630619
PCMTD1	798.43	1152.98	0.530128	0.0149821	0.234338	0.630158
BICD1	201.12	124.67	-0.689895	0.0149742	0.234338	0.630158
TIGD2	73.38	42.05	-0.803316	0.0150502	0.234789	0.629323
CITED1	1.32	9.7	2.87883	0.0150545	0.234789	0.629323
SOX12	404	570.43	0.497682	0.015041	0.234789	0.629323
ARHGAP29	442.47	207.13	-1.09509	0.0151158	0.235518	0.627976
DHPS	366.76	548.75	0.581293	0.0151587	0.235905	0.627262
CCDC9B	638.77	328.41	-0.959793	0.0152125	0.235905	0.627262
CTNNBL1	1481.59	2040.9	0.462057	0.0151742	0.235905	0.627262
LMNB2	949.06	685.51	-0.469332	0.0152136	0.235905	0.627262
ZDHHC12	305.2	479.81	0.652717	0.0152078	0.235905	0.627262
KIF6	47.24	23.92	-0.98199	0.0152915	0.236887	0.625459
LPCAT2	208.11	110.15	-0.917856	0.0153091	0.236933	0.625375
OR1J4	11.73	1.99	-2.55849	0.0154035	0.238165	0.623122
RAB4B	692.22	1107.79	0.67837	0.0154343	0.23826	0.62295
RFX5	1388.75	1844.79	0.409665	0.0154391	0.23826	0.62295
SKA1	10.37	1.34	-2.95266	0.0155129	0.239171	0.621291
KLF5	204.48	374.03	0.871147	0.0155415	0.239335	0.620994
HAT1	659.87	899.69	0.447249	0.0155531	0.239335	0.620994
LRRC17	128.74	26.85	-2.26131	0.0156004	0.239834	0.62009
CLIP3	1349.81	939.16	-0.523307	0.0157603	0.242062	0.616073
SEMA4B	771.37	1197.65	0.634705	0.0158915	0.243153	0.61412
CSRP1	7920.17	5814.41	-0.445899	0.0158559	0.243153	0.61412
TRIM47	609.33	1202.08	0.980242	0.0158772	0.243153	0.61412
SPECC1	1530.63	1059.98	-0.530093	0.0158855	0.243153	0.61412
RIPK2	2532.77	3350.26	0.403558	0.0159353	0.243593	0.613335
CDCA5	41.69	18.87	-1.14389	0.0159759	0.243984	0.612639
SCO1	730.62	521.78	-0.485689	0.0160964	0.245591	0.609787
TMEM50A	5779.32	4448.05	-0.377725	0.0161729	0.246512	0.608162
CD48	0.36	5.61	3.97917	0.0161872	0.246512	0.608162
CYP26B1	42.8	90.9	1.08658	0.0162316	0.246955	0.607383
TEAD4	134	212.86	0.667677	0.0162886	0.247358	0.606674
TUBA1A	6914.13	3747.38	-0.883665	0.0162777	0.247358	0.606674
PIK3R5	5.24	21.11	2.01021	0.0163453	0.247753	0.605981
CAVIN1	10202	7244.35	-0.49393	0.01634	0.247753	0.605981
ETFB	449.36	869.18	0.951778	0.016386	0.248137	0.605308
COL18A1	998.48	1445.93	0.534189	0.016589	0.250741	0.600774
ARRDC4	812.69	536.62	-0.598793	0.0165749	0.250741	0.600774
JUP	55.51	27.78	-0.998727	0.0166378	0.251011	0.600308
MET	4305.01	6552.1	0.60594	0.0166348	0.251011	0.600308
SLC9B2	1117.03	1480.27	0.406187	0.0166785	0.251156	0.600056
MYO18A	440.87	675.66	0.615924	0.016666	0.251156	0.600056
ECM2	232.5	100.23	-1.21389	0.0168185	0.253029	0.59683
SGMS2	308.49	184.37	-0.7426	0.0168592	0.253403	0.596188
GNA14	60.64	29.52	-1.03834	0.0168747	0.253403	0.596188
SLC7A1	2717.14	1642.94	-0.725811	0.016892	0.253427	0.596146
KRT17	159.88	59.18	-1.4338	0.0169203	0.253616	0.595824
FLII	1803.83	2444.18	0.438285	0.0169773	0.254235	0.594765
SESN2	777.37	1060.23	0.447696	0.017022	0.254668	0.594026
TTC8	589.32	829.4	0.493007	0.0171323	0.256082	0.591621
CASP7	1295.4	1849.71	0.5139	0.017168	0.256379	0.591118
ARHGAP6	61.46	126.08	1.03651	0.017245	0.256935	0.590177
RHCG	97.27	235.61	1.27642	0.0172402	0.256935	0.590177
AIM2	178.24	523.19	1.55355	0.0172529	0.256935	0.590177
TMEM41A	336.43	240.17	-0.486223	0.0172884	0.257227	0.589684
CACNA1I	25.29	51.96	1.03867	0.0173248	0.257531	0.589171
TGFB1	2795.06	4876	0.80282	0.0173745	0.258032	0.588326
CDKL5	158.81	79.76	-0.993634	0.017418	0.258441	0.587638
NDOR1	373.53	526.96	0.496481	0.017518	0.259449	0.585948
PRTG	24.9	8.98	-1.47113	0.017508	0.259449	0.585948
GSTO2	188.36	111.62	-0.754858	0.0175697	0.259723	0.58549
HPCAL1	645.66	919.96	0.510804	0.0175847	0.259723	0.58549
SOCS1	566.84	942.2	0.733084	0.0175725	0.259723	0.58549
FAM124A	394.85	568.77	0.526546	0.0176844	0.260958	0.58343
PRR16	470.79	293.3	-0.682697	0.0177113	0.261116	0.583167
GOPC	1839.41	1225.77	-0.585549	0.017811	0.262347	0.581123
SLC44A2	1961.67	1344.18	-0.545356	0.0178725	0.263013	0.580022
ANKRD9	513.5	748.96	0.544516	0.0180397	0.264436	0.57768
EME1	8.69	1.33	-2.7032	0.0179945	0.264436	0.57768
DOK1	1440.17	1036.1	-0.475075	0.0180623	0.264436	0.57768
ETS2	398.03	536.23	0.429966	0.0180479	0.264436	0.57768
SCOC	912.74	657.12	-0.474058	0.0180672	0.264436	0.57768
AKAP7	91.3	142.64	0.643662	0.01804	0.264436	0.57768
EFNB2	62.67	12.06	-2.37786	0.0181848	0.265915	0.575257
EMP1	4363.61	2520.71	-0.791688	0.0182272	0.266295	0.574637
TMPO	294.32	190.43	-0.628178	0.0183425	0.267738	0.57229
DUSP14	383.88	246.06	-0.641672	0.0184195	0.268376	0.571256
TMEM128	579.54	422.08	-0.457404	0.0184066	0.268376	0.571256
MBOAT2	971.04	1453.22	0.581653	0.0184777	0.268983	0.570275
TROAP	8.69	1.33	-2.70898	0.0185935	0.270426	0.567952
DPF3	33.61	15.51	-1.11527	0.0186729	0.271335	0.566494
PIK3IP1	575.46	343.16	-0.745827	0.0187019	0.271469	0.566279
RASD2	49.43	18.18	-1.44294	0.0187157	0.271469	0.566279
TMCC3	7	29.29	2.06586	0.0187353	0.27151	0.566213
CD74	19114.7	37261	0.962987	0.0188147	0.272417	0.564766
COL4A1	13692	6130.7	-1.15921	0.018968	0.272756	0.564226
CYLD	3007.32	4009.8	0.415048	0.0189367	0.272756	0.564226
ZNF746	386.08	512.97	0.409973	0.0189404	0.272756	0.564226
GK5	148.39	88.83	-0.740263	0.018948	0.272756	0.564226
MAPKAPK3	429.92	722.79	0.749526	0.0189398	0.272756	0.564226
MTG1	404.76	695.25	0.78045	0.0188918	0.272756	0.564226
SART3	460.32	674.1	0.550321	0.0188933	0.272756	0.564226
TNFSF15	165.32	78.38	-1.07678	0.018973	0.272756	0.564226
RNF31	743.86	1031.73	0.471968	0.0190388	0.273459	0.563108
CCDC25	574.86	427.09	-0.428666	0.0190784	0.273785	0.562591
TENT5B	8.65	1	-3.11318	0.0191069	0.27395	0.562329
MBLAC2	76.52	44.15	-0.793497	0.0191261	0.273983	0.562277
ST20-MTHFS	6.72	0.18	-5.23798	0.0191956	0.274735	0.561086
DRP2	27.68	6.5	-2.091	0.0192901	0.275733	0.559511
KIAA1549L	179.65	102.75	-0.806038	0.0192994	0.275733	0.559511
CCDC69	102.43	192.33	0.909	0.0193407	0.275836	0.559349
LRRC8D	243.83	158.03	-0.625667	0.0193335	0.275836	0.559349
MBD6	458.52	599.09	0.385793	0.0193589	0.275852	0.559324
PGK1	17617.7	11918.3	-0.56385	0.0194388	0.276746	0.557918
STK39	359.23	217.19	-0.725915	0.0196425	0.2794	0.553773
TLCD5	311.28	231.52	-0.427091	0.0197198	0.280201	0.552531
MAN2B1	1442.25	2004.91	0.475221	0.0197334	0.280201	0.552531
LIMK1	5946.69	4503.6	-0.401008	0.019828	0.281297	0.550835
CAPZA1	3259.77	2475	-0.397341	0.0199188	0.282338	0.549231
AKR1A1	1028.22	1587.45	0.626562	0.0199626	0.282464	0.549038
TAF1B	211.04	123.64	-0.771431	0.0199459	0.282464	0.549038
GLRB	211.4	146.2	-0.532047	0.0201189	0.284426	0.546031
RASA2	342.65	173.16	-0.984614	0.0201571	0.284716	0.545588
TSPAN5	547.43	364.47	-0.586871	0.0202237	0.28502	0.545125
POLQ	11.69	2.3	-2.34637	0.0202314	0.28502	0.545125
MAML3	37.76	13.82	-1.45	0.0202155	0.28502	0.545125
ZNF267	712.87	1027.45	0.527344	0.0203082	0.285222	0.544816
LAMA1	1281.47	895.59	-0.516898	0.0203369	0.285222	0.544816
ALDH7A1	280.73	200.03	-0.488965	0.0203516	0.285222	0.544816
PLPPR2	1736.84	1175.99	-0.562581	0.0203501	0.285222	0.544816
ALPK1	474.19	644.49	0.442683	0.020277	0.285222	0.544816
H1-10	1429.08	2479.64	0.79504	0.0203252	0.285222	0.544816
MYEOV	19.52	5.34	-1.86875	0.0203771	0.285332	0.54465
ADCK5	62.72	109.81	0.808064	0.0205933	0.287861	0.540818
ITSN1	457.94	317.32	-0.529206	0.0205931	0.287861	0.540818
PITPNC1	238.57	409.6	0.77979	0.0206287	0.288107	0.540446
MSRB1	504.78	740.67	0.553168	0.0206689	0.288419	0.539976
GYPC	2266.46	4041.88	0.834587	0.0207306	0.289031	0.539056
SYTL2	405.3	196.26	-1.0462	0.0207487	0.289034	0.539051
CEACAM1	37.21	71.6	0.944164	0.0207883	0.289337	0.538596
IER5	990.23	706.7	-0.48667	0.0208696	0.289969	0.537648
SNAI2	1335.11	752.15	-0.827863	0.0208617	0.289969	0.537648
MKI67	25.92	7.09	-1.86972	0.0210395	0.291974	0.534656
ENOSF1	404.05	666.64	0.722371	0.02105	0.291974	0.534656
PNPLA4	105.72	63.86	-0.72731	0.0210717	0.292024	0.534581
EXT1	4879.04	3123.73	-0.643326	0.0210906	0.292036	0.534564
ZNF385D	51.37	108.15	1.07402	0.0211233	0.292239	0.534262
RNF114	4791.2	6440.96	0.42689	0.0211774	0.292736	0.533523
GPX8	1813.36	1282.91	-0.499243	0.021237	0.29331	0.532673
SLC19A1	56.32	26.06	-1.11186	0.0213145	0.294129	0.531462
SLC26A9	3.98	14.36	1.8524	0.0214551	0.295675	0.529186
ELMO2	1887.74	2432.5	0.365781	0.0214631	0.295675	0.529186
IGFL4	17.32	5.26	-1.71857	0.0214907	0.295804	0.528997
SMIM32	0.18	4.46	4.6624	0.0215195	0.295948	0.528785
SH3RF1	280.61	158.89	-0.820527	0.0215872	0.296375	0.528159
XYLT1	2188.87	1130.02	-0.953839	0.0215769	0.296375	0.528159
MKX	39.45	15.14	-1.38146	0.0216758	0.29734	0.526747
NOTCH2NLB	359.59	492.83	0.454746	0.0217613	0.297853	0.525998
MEX3B	52.97	23.83	-1.15218	0.0217539	0.297853	0.525998
CCNG1	907.62	666.48	-0.445524	0.0217685	0.297853	0.525998
ZC3H3	562.09	763.64	0.442098	0.0219387	0.299927	0.522984
GPC1	702.7	1319.74	0.909264	0.022043	0.300845	0.521657
PDZRN4	12.8	0.68	-4.23813	0.0220374	0.300845	0.521657
KCTD10	1834	1351.52	-0.440405	0.0221197	0.301638	0.520514
MGAT4B	3055.61	4822.23	0.65824	0.0222264	0.302639	0.519075
SRF	1430.24	1063.04	-0.428056	0.0222306	0.302639	0.519075
FCER1G	149.88	283.37	0.918843	0.0222922	0.303223	0.518238
EZH2	141.98	277.38	0.966204	0.0223887	0.303776	0.517447
ISG20	1748.25	3275.26	0.905696	0.0223892	0.303776	0.517447
BLVRA	640.19	928.19	0.535926	0.0223716	0.303776	0.517447
ZC3H7B	2322	1477.32	-0.652383	0.022458	0.304199	0.516842
LRRN1	12.55	2.95	-2.08964	0.0224449	0.304199	0.516842
IRF2BPL	827.57	1152.77	0.478147	0.0225142	0.304705	0.516121
TEX261	1706.78	1323.66	-0.366743	0.0226179	0.305852	0.514488
AGPAT5	302.75	167.84	-0.851011	0.0226875	0.306281	0.513879
C1orf54	129.86	197	0.601219	0.0226732	0.306281	0.513879
FAM131B	27.85	12.89	-1.11178	0.0227443	0.306792	0.513156
CEBPB	5145.32	7047.74	0.4539	0.0228412	0.307843	0.511671
MYADM	3638.01	2240.14	-0.69956	0.0229125	0.308546	0.51068
FICD	281.94	165.62	-0.767519	0.0229484	0.308576	0.510637
PCLAF	22.31	7.91	-1.49619	0.0229529	0.308576	0.510637
ENOX1	121.57	61.71	-0.978223	0.0230973	0.31026	0.508274
SH3BP5L	1069.13	770.63	-0.472319	0.0231505	0.310716	0.507637
SH3KBP1	1110.95	1479.34	0.413156	0.023269	0.312047	0.50578
C8orf58	268.57	158.06	-0.764818	0.023351	0.312452	0.505216
SLC41A3	368.49	257.26	-0.518428	0.023335	0.312452	0.505216
GPANK1	473.18	692.49	0.549401	0.0233571	0.312452	0.505216
MSI2	118.49	190.11	0.682152	0.0234318	0.312676	0.504906
CDCA8	22.3	8.23	-1.4381	0.0234303	0.312676	0.504906
CCL8	12715.5	23104.3	0.861575	0.0234249	0.312676	0.504906
CTTNBP2NL	1244.12	900.9	-0.46569	0.0234729	0.312708	0.504861
TPST1	3346.7	2521.72	-0.408333	0.0234566	0.312708	0.504861
NQO2	376.27	852.47	1.1799	0.023497	0.312771	0.504773
NDUFV2	1122.62	1727.37	0.62171	0.0235587	0.313335	0.503991
LBP	659.26	1599.88	1.27904	0.0235994	0.313618	0.503599
FBXO27	115.26	69.36	-0.732733	0.0236299	0.313766	0.503395
BCAR3	913.65	531.43	-0.781757	0.0236804	0.314178	0.502824
GJC1	307.06	146.07	-1.07188	0.0238263	0.314247	0.502728
SLC16A8	17.69	5.68	-1.63808	0.0237601	0.314247	0.502728
PHGDH	315.39	190.41	-0.728046	0.0238238	0.314247	0.502728
BEX3	2111.83	3393.88	0.68444	0.0237883	0.314247	0.502728
MT1B	0.17	3.78	4.43153	0.0237724	0.314247	0.502728
OAS3	8648.99	11202.6	0.373234	0.0237504	0.314247	0.502728
RTN4	10925.8	8633.43	-0.339734	0.0238411	0.314247	0.502728
PRPF3	728.8	980.94	0.428649	0.0238167	0.314247	0.502728
ETFRF1	81.94	126.39	0.625154	0.0239193	0.314777	0.501997
HDGFL3	1346.27	934.04	-0.527407	0.0239202	0.314777	0.501997
CYRIB	160.22	227.19	0.503832	0.0240889	0.316577	0.49952
PSG1	70.13	22.47	-1.64203	0.0240961	0.316577	0.49952
NAXD	476.72	619.47	0.377907	0.0242577	0.318442	0.49697
COL4A4	16.64	4.23	-1.97526	0.0243871	0.318846	0.496419
CLDN4	1050.89	725.44	-0.53469	0.0243489	0.318846	0.496419
NECTIN2	2487.27	3374.27	0.440009	0.0243437	0.318846	0.496419
INTS14	273.79	434.49	0.666257	0.0243868	0.318846	0.496419
SNN	338.34	496.68	0.553865	0.0243106	0.318846	0.496419
XDH	19.06	5.66	-1.75308	0.0244836	0.31985	0.495054
NRBF2	774.18	481.9	-0.683947	0.0245287	0.319922	0.494956
WNK2	3.63	13.52	1.89724	0.0245107	0.319922	0.494956
ERCC6L	6.69	0.66	-3.34422	0.0245611	0.320087	0.494733
PSMA6	4417.64	5928.92	0.424493	0.0245936	0.320251	0.494509
FIGNL1	93.03	52.29	-0.831113	0.0246968	0.321337	0.49304
MTCH1	5192.76	3965.27	-0.389083	0.0247224	0.321411	0.492939
DAZL	4.53	0.18	-4.68437	0.0247614	0.32166	0.492603
NME1-NME2	12.93	29.76	1.20309	0.0248472	0.321998	0.492147
LMLN	86.17	191.53	1.15237	0.0248283	0.321998	0.492147
SPATA2	346.89	245.84	-0.496754	0.02482	0.321998	0.492147
RSRC1	260.21	372.12	0.516097	0.0248965	0.322379	0.491634
CETN3	201.49	130.94	-0.621821	0.0249857	0.323275	0.490428
SYNGR3	26.96	57.55	1.09431	0.0251387	0.324994	0.488124
OVOL1	2.96	13.43	2.18003	0.0252412	0.326059	0.486704
TUBA1B	9982.9	6562.96	-0.605112	0.0252683	0.326149	0.486584
SCN8A	277.52	109.58	-1.34065	0.0253642	0.327126	0.485285
PPA1	2291.22	3567.57	0.638829	0.0254138	0.327429	0.484883
CDT1	15.03	3.6	-2.06278	0.0254282	0.327429	0.484883
SMC2	334.53	197.34	-0.761449	0.0255178	0.328321	0.483701
GTDC1	346.89	255.99	-0.438391	0.0255388	0.32833	0.48369
SELENOW	485.46	770.81	0.66701	0.0255595	0.328335	0.483683
HERPUD1	1298.78	859.32	-0.595886	0.025628	0.328953	0.482866
SERTAD2	1633	1043.28	-0.646395	0.0256488	0.32896	0.482857
FAH	201.51	347.05	0.784263	0.0258521	0.331229	0.479871
MGST1	5019.1	8776.04	0.806142	0.0258667	0.331229	0.479871
QRSL1	216.33	298.96	0.466753	0.025954	0.332084	0.478752
OPCML	9.02	1.65	-2.44953	0.0260628	0.333213	0.477279
LNPK	481.78	312.84	-0.622955	0.0261887	0.334557	0.47553
PPIC	860.02	1200.88	0.481642	0.0262191	0.334682	0.475368
QSOX1	49818.3	32635.8	-0.610221	0.0262516	0.334832	0.475173
BTG2	880.14	1690.23	0.941416	0.0263848	0.336266	0.473317
TIAF1	173.15	337.55	0.96307	0.0264971	0.337432	0.471814
NR4A3	268.88	543.43	1.01509	0.0265261	0.337535	0.471681
IGSF8	1211.49	2021.99	0.738994	0.0265869	0.338042	0.471029
NEB	7.26	0.98	-2.8894	0.0266453	0.338519	0.470417
F3	379.73	177.5	-1.09713	0.0266835	0.338738	0.470136
CTSA	10604.1	15329.3	0.531666	0.0267304	0.338848	0.469996
SLC39A10	56.69	25.39	-1.15893	0.0267347	0.338848	0.469996
LRP11	677.45	488.41	-0.472021	0.026755	0.338848	0.469996
ATG4D	215.94	331.67	0.61908	0.0268198	0.33932	0.469391
PHYKPL	337.69	450.82	0.416848	0.0268342	0.33932	0.469391
TRPC3	0.18	3.79	4.43518	0.0270288	0.341513	0.466593
SLC25A17	273.45	372.05	0.444236	0.0271059	0.34222	0.465694
NGFR	5.65	20.69	1.87232	0.0271428	0.342418	0.465444
RGS10	89.37	146.03	0.708348	0.0272175	0.342969	0.464745
SPHK1	3066.37	2128.38	-0.526777	0.0272288	0.342969	0.464745
ZNF316	461.67	602.02	0.382937	0.0272972	0.343562	0.463994
OSGIN2	1029.04	1787.92	0.796986	0.0274157	0.344785	0.462451
MTRF1	77.5	119.34	0.622891	0.0275059	0.345651	0.461362
BCL2L14	4.32	13.6	1.65529	0.02754	0.345811	0.461161
N4BP2L1	172.27	251.56	0.546246	0.0277075	0.347644	0.458865
ZNF672	393.48	569.03	0.532243	0.0277496	0.347903	0.458542
GDF10	8.21	1	-3.0392	0.0277896	0.348134	0.458253
AMBRA1	635.16	853.69	0.426588	0.0279477	0.349843	0.456127
TC2N	3.31	15.4	2.21625	0.0280092	0.350343	0.455507
KIF20A	14.36	4.32	-1.73333	0.0280781	0.350662	0.455111
VSNL1	0.67	8.29	3.63741	0.0280699	0.350662	0.455111
ZNF367	29.08	7.43	-1.96918	0.0281365	0.35112	0.454544
ISCA2	189.39	309.41	0.708178	0.0283136	0.352514	0.452824
ZNF335	288.85	401.66	0.47565	0.0282851	0.352514	0.452824
CENPK	47.56	22.36	-1.08878	0.0282947	0.352514	0.452824
PITRM1	1596.92	2205.16	0.465589	0.0285119	0.353081	0.452126
CLUH	831.13	1124.77	0.436485	0.0283934	0.353081	0.452126
DNAJB2	1388.86	1105.94	-0.328621	0.0284494	0.353081	0.452126
RETREG1	233.63	380.29	0.702864	0.02849	0.353081	0.452126
METTL4	221.95	307.79	0.471724	0.0284989	0.353081	0.452126
APOO	162.7	277.71	0.771343	0.0284942	0.353081	0.452126
NTN1	3301.62	4886.06	0.5655	0.0284242	0.353081	0.452126
CMTM8	1	6.6	2.7296	0.0286214	0.353552	0.451547
SIGLEC15	96.5	41.6	-1.21399	0.0286461	0.353552	0.451547
PIPOX	7.34	0.99	-2.88914	0.0286593	0.353552	0.451547
SALL1	0.36	5.76	4.01454	0.0286056	0.353552	0.451547
HAVCR2	21.73	58.66	1.43254	0.0286359	0.353552	0.451547
CHRNA1	27.67	9.81	-1.49522	0.0287369	0.35424	0.450703
GMPR	346.1	622.08	0.845912	0.0289716	0.356318	0.448162
ZFAND4	112.04	179.46	0.679629	0.0289379	0.356318	0.448162
RAB9A	487.1	690.12	0.502631	0.0289656	0.356318	0.448162
C18orf25	712.11	447.8	-0.669237	0.0290285	0.356746	0.447641
CTSD	21575.7	36188.8	0.746134	0.0291545	0.358023	0.446089
C3orf14	145.54	226.01	0.634914	0.0292425	0.35856	0.445438
L2HGDH	119.18	179.69	0.592392	0.0292426	0.35856	0.445438
PLAU	12588	5903.75	-1.09234	0.0293356	0.359427	0.444389
NADSYN1	389.69	589.27	0.596594	0.0293927	0.359854	0.443873
INAFM2	340.9	224.63	-0.601816	0.0294559	0.360083	0.443597
P3H2	1568.48	936.08	-0.74467	0.0294542	0.360083	0.443597
SCN2A	35.7	13.85	-1.36642	0.0294926	0.360259	0.443385
MCM2	124.74	75	-0.733949	0.0295775	0.361024	0.442464
COX17	244.71	351.84	0.52384	0.0297034	0.361559	0.44182
NR2F6	462.07	301.84	-0.614321	0.0296635	0.361559	0.44182
ETAA1	171.55	251.77	0.553463	0.0296875	0.361559	0.44182
FNBP1L	311.19	210.22	-0.565881	0.0297168	0.361559	0.44182
LONP1	1284.03	1666.17	0.375859	0.0297331	0.361559	0.44182
RGS17	39.61	90.01	1.18403	0.0298237	0.362116	0.441152
PRRG4	268.51	439.48	0.710837	0.0298101	0.362116	0.441152
CENPN	140.94	91.56	-0.622261	0.0299269	0.362825	0.440303
MEX3A	94.3	57.55	-0.712291	0.0299083	0.362825	0.440303
TRAM1	5340.4	3500.25	-0.609493	0.030001	0.363451	0.439554
SEMA3E	79.98	32.81	-1.28554	0.0300543	0.363824	0.439109
MKRN1	1704.01	2316.5	0.44301	0.0300948	0.364039	0.438852
SNX21	474.94	749.06	0.657338	0.0301171	0.364039	0.438852
DNAL4	352.64	254.93	-0.468136	0.0302119	0.364218	0.438638
NECAP1	876.96	1149.33	0.390216	0.0301907	0.364218	0.438638
FAM171A2	34.61	14.17	-1.28892	0.0301995	0.364218	0.438638
UBE2Q1	1341.13	979.72	-0.453008	0.030244	0.364218	0.438638
ADGRG6	15.09	3.27	-2.20656	0.0302446	0.364218	0.438638
ARHGAP11A	86.49	49.66	-0.800399	0.0303373	0.365063	0.437632
CDC25B	2430.32	4183.88	0.783696	0.0304462	0.366101	0.436399
SLC2A6	1277.3	1837.75	0.52484	0.0304858	0.36612	0.436376
FAS	2407.62	3139.82	0.383074	0.0305157	0.36612	0.436376
SH3D21	116.43	58.32	-0.997361	0.0305049	0.36612	0.436376
GLT8D2	173	84.68	-1.03076	0.0305586	0.366363	0.436088
CLCN7	2567.26	3416.72	0.412382	0.0308821	0.367114	0.435199
VWA8	979.26	513.41	-0.931586	0.030885	0.367114	0.435199
FOS	40.7	110.89	1.44619	0.0308902	0.367114	0.435199
RAPGEF1	929.12	1218.61	0.39129	0.0306552	0.367114	0.435199
TBC1D3C	6.5	0.18	-5.19023	0.0306757	0.367114	0.435199
ANKRD16	46.47	79.04	0.766174	0.0307659	0.367114	0.435199
SPDL1	185.38	126.22	-0.554561	0.0307585	0.367114	0.435199
AUP1	1362.51	2042.51	0.58408	0.0308668	0.367114	0.435199
APPL2	439.2	325.57	-0.431896	0.0307331	0.367114	0.435199
GOLGA6L10	8.07	0.67	-3.59585	0.0307798	0.367114	0.435199
TAC1	5.61	16.16	1.5262	0.0308936	0.367114	0.435199
HS3ST3A1	321.31	190.86	-0.75144	0.0307959	0.367114	0.435199
DDX23	1413.96	1756.84	0.313246	0.0309779	0.367845	0.434335
SLC9A1	1415.72	1032.22	-0.455779	0.0310006	0.367846	0.434334
BIN1	965.67	1507.37	0.642424	0.0310784	0.368497	0.433566
ITGB6	29.29	10.94	-1.42036	0.0312309	0.369196	0.432743
RAB23	1141.63	812.03	-0.491487	0.0311789	0.369196	0.432743
CHCHD3	458.94	666.55	0.538418	0.0312175	0.369196	0.432743
MCM10	16.74	3.9	-2.10242	0.0312514	0.369196	0.432743
RILP	128.87	219.63	0.769238	0.0312495	0.369196	0.432743
VPS26B	446.34	616.56	0.466104	0.0312936	0.369424	0.432475
ATP6V1D	627.75	889.38	0.502599	0.0313415	0.36972	0.432127
NUDT11	52.8	25.41	-1.05512	0.0313969	0.370104	0.431676
PILRB	128.84	229.87	0.835272	0.0314573	0.370545	0.431159
SEC61B	1732.08	1375.84	-0.332194	0.0316962	0.372236	0.429182
SLCO2B1	13.88	29.68	1.09704	0.031709	0.372236	0.429182
TRIM32	799.98	553.46	-0.531476	0.0317159	0.372236	0.429182
CPAMD8	21.59	41.96	0.958522	0.0316648	0.372236	0.429182
CCS	187.08	326.75	0.804475	0.0316631	0.372236	0.429182
MMP25	94.21	146.05	0.632447	0.0318019	0.372434	0.42895
RAD54L	16.06	4.32	-1.89444	0.0317679	0.372434	0.42895
PLXDC2	546.07	326.06	-0.743944	0.0317974	0.372434	0.42895
PRXL2B	314.17	201.39	-0.641535	0.0318635	0.372886	0.428424
ARHGAP24	401.66	271.13	-0.566972	0.031977	0.373944	0.427193
ODF3B	393.26	685.92	0.802565	0.0320703	0.374764	0.426242
NPFFR2	0.36	5.71	4.00471	0.032162	0.375293	0.42563
NPIPB3	178.41	275.97	0.62926	0.0321485	0.375293	0.42563
ABR	2086.28	2898.64	0.474444	0.0324243	0.378081	0.422415
GAS6	6842.28	4886.47	-0.485686	0.0325962	0.379251	0.421073
RPS15	795.57	1314.42	0.724363	0.0326185	0.379251	0.421073
SORT1	333.3	181.15	-0.879579	0.0325886	0.379251	0.421073
CDCA7	8.72	0.98	-3.1558	0.0325964	0.379251	0.421073
GALK2	231.9	318.59	0.458206	0.0327104	0.380047	0.420163
STT3A	4149.16	3270.17	-0.34345	0.0328195	0.381041	0.419029
POU4F2	5.01	25.68	2.35629	0.0328638	0.381282	0.418754
BCKDHA	585.91	899.64	0.618657	0.0330004	0.382592	0.417264
SOX9	203.37	122.37	-0.732861	0.0330277	0.382634	0.417217
MYOF	3857.17	2538.67	-0.603473	0.033074	0.382895	0.41692
ARL6IP5	1761.43	2467.21	0.486135	0.0331221	0.383026	0.416772
PPARG	24.45	55.3	1.17742	0.0331326	0.383026	0.416772
ETV6	500.73	661.76	0.402266	0.033339	0.385058	0.414473
LYPD3	307.76	797.63	1.37393	0.033356	0.385058	0.414473
CKS2	329.8	213.72	-0.625877	0.0334398	0.385432	0.414052
ASTN2	60.53	31.66	-0.935108	0.0334837	0.385432	0.414052
FAM234A	2955.56	3825.32	0.372147	0.0334719	0.385432	0.414052
SYT12	19.72	61.77	1.6472	0.0334549	0.385432	0.414052
MRPL45	243.71	337.12	0.468089	0.0335091	0.38545	0.414032
TMEM59L	134.63	237.51	0.81895	0.0335727	0.385633	0.413826
HEXD	232.7	360.92	0.633183	0.0335571	0.385633	0.413826
ASCL2	221.34	135.05	-0.712786	0.0336271	0.385984	0.41343
PBLD	94.4	59.82	-0.658227	0.0337384	0.386987	0.412304
DNAAF11	47.19	26.09	-0.854923	0.0337944	0.387354	0.411892
PGRMC2	2136.42	1385.81	-0.624463	0.0339071	0.387637	0.411575
PNKP	239.5	359.67	0.586683	0.0340544	0.387637	0.411575
NLRP1	408.63	268.74	-0.604589	0.0339165	0.387637	0.411575
GPR153	105.1	191.39	0.864775	0.0339514	0.387637	0.411575
RHOJ	66.37	31.28	-1.08548	0.0340587	0.387637	0.411575
H3C4	4.64	15.31	1.72126	0.0340572	0.387637	0.411575
SPNS1	1659.68	2366.06	0.511582	0.0340481	0.387637	0.411575
NUMBL	470.77	324.51	-0.536762	0.0338701	0.387637	0.411575
SYTL4	60.4	93.74	0.634207	0.0339756	0.387637	0.411575
CDC20	22.33	8.25	-1.43662	0.0339276	0.387637	0.411575
CLBA1	129.71	90.22	-0.523662	0.034127	0.388078	0.411082
SH3GL3	5.3	0.36	-3.89859	0.0341454	0.388078	0.411082
VPS53	591.89	455.26	-0.378635	0.0341859	0.388264	0.410873
CENPU	20.72	7.26	-1.51345	0.0342456	0.38867	0.410419
APEH	807.32	1178.25	0.545421	0.0342777	0.388761	0.410318
NECAP2	1569.14	1980.3	0.335749	0.034329	0.389071	0.409972
GPR160	32.6	15.01	-1.11911	0.0344033	0.389639	0.409337
ABCF1	1182.13	1476.26	0.320559	0.0345277	0.389772	0.40919
PRKCA	655.43	456.58	-0.521589	0.0345017	0.389772	0.40919
ACTG1	37784.8	25073.2	-0.59166	0.034527	0.389772	0.40919
UGCG	1442.85	890.42	-0.696358	0.0345845	0.389772	0.40919
OGFOD3	524.06	727.81	0.473831	0.0345872	0.389772	0.40919
CCNA1	1.67	11.27	2.75156	0.034575	0.389772	0.40919
PDIA4	3744.54	2913.34	-0.362111	0.0346078	0.389772	0.40919
PPP1R26	174.14	248.89	0.515237	0.0344615	0.389772	0.40919
ERLIN1	1198.21	1531.87	0.354405	0.0346447	0.389916	0.409029
UBE2T	55.84	33.55	-0.735125	0.0346775	0.390013	0.408921
EFHD1	1.99	10.43	2.38839	0.0347762	0.390851	0.407989
CACNB2	4.31	13.35	1.63174	0.0348678	0.391609	0.407147
HTRA4	21.6	6.3	-1.77738	0.034894	0.391631	0.407123
HLA-DMA	931.72	1641.62	0.817151	0.0349439	0.391919	0.406803
FEZ1	307.74	207.46	-0.568861	0.0349948	0.392218	0.406473
ART3	60.6	99.98	0.722499	0.0352216	0.394487	0.403967
PLSCR3	1315.1	964.8	-0.44688	0.0352833	0.394904	0.403508
ITPRIPL2	2175.7	1460.81	-0.57471	0.0353994	0.39593	0.402382
MUCL1	0.17	3.53	4.33642	0.0354716	0.396463	0.401798
CCNB2	19.34	7.31	-1.40392	0.0355001	0.396508	0.401748
LPAR4	5.63	0.66	-3.09919	0.0357592	0.399126	0.398889
CDH4	23.53	5.03	-2.22699	0.0358985	0.400128	0.397801
PSG5	490.91	209.15	-1.23091	0.0358967	0.400128	0.397801
CDK5R1	60.48	32.15	-0.91145	0.0359866	0.400834	0.397035
TNC	55883.3	32534.8	-0.780436	0.0360328	0.401072	0.396778
MSRB3	640.55	341.35	-0.908036	0.0361002	0.40127	0.396563
FAM8A1	1248.12	1718.54	0.46142	0.0360949	0.40127	0.396563
TLCD1	187.68	310.17	0.724774	0.0361665	0.401456	0.396362
SLC17A9	243.86	167.7	-0.540162	0.036153	0.401456	0.396362
ANKRD13D	316.03	462.4	0.549094	0.0362101	0.401664	0.396137
PARP15	258.81	146.26	-0.823331	0.0362952	0.402056	0.395713
MLF1	54.04	31.24	-0.790424	0.036281	0.402056	0.395713
RASSF9	6.94	0.65	-3.42501	0.0363244	0.402104	0.395661
GPRASP2	106.94	72.32	-0.564277	0.0363754	0.402393	0.395349
PRKAR2B	81.4	159.23	0.967933	0.0365446	0.403438	0.394224
PYCR1	126.5	83.61	-0.597284	0.0365427	0.403438	0.394224
GPR89A	259.76	181.07	-0.520653	0.0365082	0.403438	0.394224
DMXL2	255.99	457.23	0.836842	0.0366255	0.403509	0.394147
FBXW4	499.55	706.3	0.499652	0.0366259	0.403509	0.394147
TBCK	359.59	274.79	-0.388006	0.0365991	0.403509	0.394147
DTL	57.53	16.02	-1.84487	0.0366509	0.40351	0.394146
KIAA0319L	1409.73	1861.2	0.400815	0.0367092	0.403876	0.393752
SLC46A1	151.02	88.46	-0.771708	0.037098	0.407876	0.389472
KDELR1	3356.32	2715.86	-0.30547	0.0371628	0.408311	0.389009
NME7	253.11	181	-0.483789	0.037245	0.408936	0.388345
HNRNPA3	4422.82	3499.6	-0.337777	0.0373928	0.410002	0.387214
ADGRF4	21.95	59.68	1.44295	0.0373745	0.410002	0.387214
PLXNA2	202.82	136.57	-0.570573	0.0374796	0.410676	0.3865
MITF	54.44	32.72	-0.734743	0.0378428	0.414375	0.382606
STEAP1B	190.95	106.94	-0.836336	0.0383265	0.419103	0.377679
ADGRD1	451.59	79.76	-2.50127	0.0383065	0.419103	0.377679
CA13	85.74	172.43	1.00789	0.0385753	0.421255	0.375455
TFPI	419.77	296.93	-0.499486	0.0385632	0.421255	0.375455
ST3GAL5	180.84	385.11	1.09057	0.0386412	0.42169	0.375007
TUBGCP2	683.89	920.74	0.429028	0.0387337	0.422129	0.374555
POLR1F	262.87	383.01	0.543003	0.0387172	0.422129	0.374555
DDX39A	343.37	522.74	0.606342	0.0389133	0.423213	0.373441
DAAM2	370.31	184.48	-1.00522	0.0389253	0.423213	0.373441
OSTF1	354.18	236.06	-0.585335	0.038885	0.423213	0.373441
SIRT7	200.13	309.97	0.631216	0.038964	0.423213	0.373441
GAS7	270.98	381.18	0.492255	0.0389425	0.423213	0.373441
SLC30A4	156.11	94.78	-0.719909	0.0390473	0.423833	0.372805
SLC37A1	196.28	295.57	0.5906	0.0390914	0.424027	0.372606
PDCD5	640.49	967.65	0.595314	0.0391206	0.42406	0.372573
LPCAT3	450.02	622.46	0.467984	0.0394717	0.424153	0.372477
TRIM38	1142.52	1428.67	0.322449	0.039423	0.424153	0.372477
DTNB	84.43	121.97	0.530693	0.039508	0.424153	0.372477
AFF2	70.2	151.66	1.11131	0.0394578	0.424153	0.372477
DENND2A	38.23	16.74	-1.19173	0.0394982	0.424153	0.372477
GATC	411.38	314.69	-0.386537	0.0394877	0.424153	0.372477
CAVIN4	34.56	17.46	-0.98543	0.039514	0.424153	0.372477
NAGLU	1794.46	2569.45	0.51791	0.0394623	0.424153	0.372477
DDIT4	4663.23	6659.32	0.514044	0.0394448	0.424153	0.372477
ACSM5	21.45	42.83	0.997353	0.0393188	0.424153	0.372477
MICAL1	563.36	805.69	0.51618	0.0394647	0.424153	0.372477
SKP2	188.01	127.41	-0.561305	0.0393404	0.424153	0.372477
KLHL15	119.78	175.67	0.5525	0.0393866	0.424153	0.372477
TRADD	397.76	578.41	0.54021	0.0395226	0.424153	0.372477
MVB12B	371.25	518.97	0.483264	0.0393746	0.424153	0.372477
RAB31	3625.9	4670.19	0.365139	0.0396393	0.425124	0.371485
RFX2	110.99	71.25	-0.639527	0.039672	0.425192	0.371415
FZD2	759.06	497.68	-0.609005	0.0397721	0.425983	0.370608
TMEM263	1951.47	1345.72	-0.536188	0.0398349	0.426373	0.37021
TCIRG1	2075.01	2952.23	0.508688	0.0399625	0.427069	0.369502
KLRD1	51.83	100.34	0.953006	0.0399791	0.427069	0.369502
SMAD3	431.85	269.09	-0.682432	0.0399772	0.427069	0.369502
NXNL2	53.74	28.47	-0.916577	0.0400812	0.427876	0.368682
BRD7	736.94	927.86	0.332356	0.0403024	0.429307	0.367232
H3-3A	1265.49	1710.79	0.434967	0.0403214	0.429307	0.367232
IL1B	1646.84	3133.14	0.927905	0.0402632	0.429307	0.367232
OASL	2180.11	3537.72	0.698415	0.040272	0.429307	0.367232
EPN2	579.1	450.41	-0.36257	0.0404302	0.430183	0.366347
IMPACT	536.39	376.16	-0.511934	0.040509	0.430276	0.366253
SPTAN1	3736.39	4992.27	0.41805	0.0405242	0.430276	0.366253
AKR7A2	324.31	507.93	0.647257	0.0405454	0.430276	0.366253
DSEL	724.89	1057.1	0.544273	0.0404676	0.430276	0.366253
TPM2	2759.91	1823.22	-0.598138	0.0406613	0.431223	0.365298
TRIM34	162.06	225.97	0.479609	0.0407577	0.431963	0.364554
ICA1	18.37	6.99	-1.39353	0.0408225	0.432161	0.364354
PIGV	675.32	514.07	-0.393621	0.0408299	0.432161	0.364354
PHKA1	89.05	139.89	0.651657	0.0408798	0.432196	0.364319
ADAM15	1727.79	2533.02	0.551936	0.0408866	0.432196	0.364319
CSNK1D	1857.8	2340.48	0.333208	0.0411752	0.434962	0.361548
GJC2	40.79	22.33	-0.869096	0.0412627	0.435601	0.360911
RAB7A	3664.75	4622.14	0.334845	0.0412942	0.43565	0.360862
CRYBG1	312.15	461.65	0.56457	0.041331	0.435753	0.360759
KLHL23	0.18	6.13	5.10776	0.0414267	0.436478	0.360038
LEPROT	2491.29	1878.39	-0.407396	0.0414608	0.436554	0.359963
NQO1	3059.91	4791.82	0.647085	0.0415766	0.437203	0.359317
EYA2	92.59	57.54	-0.686185	0.0415552	0.437203	0.359317
ELL2	4260.44	2843.78	-0.583191	0.0417066	0.437958	0.358567
KMT5A	455.36	328.69	-0.470276	0.0417036	0.437958	0.358567
IFITM10	299.83	500.81	0.74009	0.0417297	0.437958	0.358567
APCDD1L	4624.71	5809.78	0.329121	0.0418629	0.438517	0.358013
EIF4EBP1	315.32	223.41	-0.49714	0.0418914	0.438517	0.358013
DOCK5	275.55	186.91	-0.559934	0.041877	0.438517	0.358013
EIF2B2	308.04	473.52	0.620313	0.0418824	0.438517	0.358013
C15orf61	75.78	46.26	-0.712147	0.0420066	0.43927	0.357269
STX10	166.5	271.31	0.704399	0.0420176	0.43927	0.357269
ADAMTS7	1601.25	2247.88	0.489365	0.0420626	0.439456	0.357084
SNX20	0.67	5.97	3.16124	0.0421955	0.440561	0.355994
PIK3R1	450.67	322.31	-0.483624	0.0423194	0.441569	0.355002
CREBL2	841.02	657.46	-0.35523	0.0423651	0.441761	0.354813
TMEM38B	325.16	457.82	0.493625	0.0424011	0.441851	0.354724
CDKN2B	547.6	849.18	0.632954	0.042539	0.442717	0.353874
MAP3K3	726.21	524.29	-0.470015	0.0425175	0.442717	0.353874
MYLK	1946.38	1081.08	-0.848315	0.0426225	0.443301	0.353301
HES1	39.43	125.25	1.66766	0.0427536	0.444379	0.352246
IFI30	12411.1	16917.9	0.446922	0.0429398	0.445837	0.350824
ASPM	16.26	5.2	-1.64386	0.042949	0.445837	0.350824
SIM2	432.85	228.57	-0.92123	0.0431343	0.447473	0.349233
ELF4	849.6	1113.71	0.390523	0.043236	0.447524	0.349183
RNF165	16.8	3.66	-2.19913	0.0431863	0.447524	0.349183
MFSD13A	33.5	55.23	0.72133	0.0432499	0.447524	0.349183
PEX11G	49.55	28.22	-0.812082	0.0432279	0.447524	0.349183
TBC1D17	660.37	956.96	0.535188	0.0433748	0.447957	0.348763
CFAP69	79.07	41.91	-0.915842	0.0433741	0.447957	0.348763
FZD8	958.15	679.11	-0.496594	0.0433546	0.447957	0.348763
PGBD5	265.21	453.72	0.774643	0.0435529	0.449394	0.347373
RTL8C	3412.3	2656.91	-0.360998	0.0435695	0.449394	0.347373
CPT2	386.71	494.44	0.354524	0.0436307	0.449738	0.34704
TMEM14B	556.16	426.87	-0.381695	0.0436615	0.449769	0.34701
SGCE	1200.29	810.08	-0.567239	0.0436944	0.449821	0.34696
RNF2	180.09	119.18	-0.595506	0.0437499	0.450106	0.346685
HIC1	419.91	252.28	-0.73503	0.0439166	0.451534	0.34531
KLF2	114.7	70.53	-0.701451	0.0440731	0.451708	0.345143
FAM216A	58.57	31.16	-0.910344	0.0439967	0.451708	0.345143
GALNT18	138.51	84.72	-0.709233	0.0440693	0.451708	0.345143
UBC	23251.2	31112.5	0.42019	0.0439736	0.451708	0.345143
CD47	4014.1	5719.81	0.510889	0.0440485	0.451708	0.345143
NEK2	5.32	0.66	-3.00693	0.0441228	0.45193	0.344928
NAXE	231.66	348.38	0.588636	0.0441903	0.452335	0.34454
LPCAT4	167.09	114.7	-0.542782	0.0442241	0.452395	0.344482
ERFE	92.47	141.25	0.611309	0.0443354	0.453247	0.343665
STEAP3	2120.94	2696.64	0.346454	0.0445147	0.454793	0.342187
SLC26A2	252.86	146.36	-0.788837	0.0445974	0.455062	0.341929
BBS7	315.97	201.94	-0.645887	0.0445711	0.455062	0.341929
FKBP9	4784.82	3852.14	-0.312803	0.0447605	0.455999	0.341036
PI3	274.21	561.4	1.03373	0.0447188	0.455999	0.341036
TUBGCP6	422.47	542.33	0.360308	0.0447738	0.455999	0.341036
SNX15	345.76	458.83	0.408193	0.0449293	0.457295	0.339803
ARF6	2367.95	1895.44	-0.321107	0.0450038	0.457512	0.339597
SHOX	110.39	65.93	-0.743512	0.0450072	0.457512	0.339597
NUDC	799.15	1194.11	0.579395	0.0451348	0.458233	0.338913
RABGGTA	466.5	643.2	0.463384	0.0451265	0.458233	0.338913
MAX	2200.61	1695	-0.376623	0.0452418	0.459031	0.338158
STX4	762.27	1063.65	0.48065	0.0454228	0.460578	0.336697
ASB1	566.52	393.46	-0.525886	0.0455185	0.46126	0.336055
UBQLN2	1506.85	1080.64	-0.479649	0.0455551	0.461342	0.335977
SLC12A2	129.57	84.33	-0.619578	0.0456494	0.462007	0.335351
CD2AP	884.52	465.74	-0.925355	0.0456789	0.462016	0.335343
PAQR5	83.1	191.86	1.20703	0.0458338	0.463004	0.334415
SCN1B	666.64	946.71	0.506009	0.0458058	0.463004	0.334415
LRRC38	8	21.37	1.41786	0.0461038	0.463784	0.333685
SGO2	49.85	27.25	-0.871016	0.0460697	0.463784	0.333685
ARHGAP27	239.08	332.24	0.474689	0.0461642	0.463784	0.333685
PHF19	211.99	152.98	-0.470579	0.0461555	0.463784	0.333685
KY	50.11	26.38	-0.925674	0.0460055	0.463784	0.333685
GPAM	272.54	136.72	-0.995244	0.0461224	0.463784	0.333685
PTPRD	19.18	52.49	1.45211	0.0460021	0.463784	0.333685
NR2F2	319.34	563.8	0.820097	0.0461977	0.463784	0.333685
EIF4EBP3	114.21	194.13	0.765341	0.0461379	0.463784	0.333685
MFHAS1	443.33	608.35	0.456518	0.0461782	0.463784	0.333685
DYRK1B	317.63	453.7	0.514415	0.0462462	0.463982	0.333499
CPM	695.4	377.53	-0.881233	0.0463496	0.464731	0.332798
TGFBR3	591.58	351.16	-0.752451	0.0464117	0.465066	0.332486
SLC26A6	471.29	680.71	0.530442	0.0465017	0.465103	0.332451
RNASEH2C	387.5	640.62	0.725272	0.0464463	0.465103	0.332451
SQSTM1	26121.4	41961.3	0.683825	0.0464735	0.465103	0.332451
SUN2	2190.28	1784.36	-0.295711	0.0465459	0.465258	0.332306
MAOB	312.31	1226.41	1.97337	0.0466408	0.465918	0.33169
HOXA7	112.07	176.23	0.653023	0.0466779	0.466002	0.331613
CCDC12	135.58	199.03	0.553858	0.0468641	0.466397	0.331244
KCNMB4	11.35	3.34	-1.76688	0.0467562	0.466397	0.331244
HHEX	2.66	9.54	1.84279	0.0468946	0.466397	0.331244
S1PR5	6.7	1.01	-2.7273	0.0468044	0.466397	0.331244
PPAT	161.22	103.71	-0.636541	0.0468568	0.466397	0.331244
TNFRSF1B	1962.14	2516.83	0.35918	0.0469195	0.466397	0.331244
CHAC1	279.02	183.39	-0.605416	0.04686	0.466397	0.331244
MSX2	394.97	259.95	-0.603524	0.0470317	0.467226	0.330473
ZNF775	63.66	101.81	0.677379	0.0470991	0.467321	0.330385
CCL4	14.67	56.07	1.93456	0.0470716	0.467321	0.330385
KLF15	1.34	7.74	2.53403	0.0471847	0.467597	0.330128
TKT	2513.44	3902.75	0.634825	0.0471578	0.467597	0.330128
CPSF4	237.66	324.82	0.450741	0.0472581	0.468038	0.329719
FARP1	783.33	553.76	-0.500353	0.0474851	0.468464	0.329324
CES4A	80.1	51.94	-0.624839	0.0475313	0.468464	0.329324
IL12RB2	0.35	6.38	4.16984	0.0474239	0.468464	0.329324
RPS27L	2872.23	2044.27	-0.490589	0.0475798	0.468464	0.329324
SELENOT	1238.44	986.33	-0.328377	0.0475908	0.468464	0.329324
MCOLN1	484.51	693.42	0.517202	0.0474046	0.468464	0.329324
PTGS2	18964.8	36320.7	0.937465	0.0475745	0.468464	0.329324
PGAP6	1588.88	2087.43	0.393717	0.0475051	0.468464	0.329324
TBC1D15	490.58	666.62	0.442376	0.0475267	0.468464	0.329324
CDC45	17.02	4.89	-1.80026	0.0474578	0.468464	0.329324
RTL8B	557.69	420.58	-0.40709	0.0476824	0.468826	0.328989
PEAK1	1378.93	882.45	-0.643968	0.0476856	0.468826	0.328989
PLD1	1123.94	1649.75	0.553674	0.0477938	0.469605	0.328267
C11orf98	267.54	422.43	0.658972	0.0479933	0.470421	0.327513
BTN2A1	2624.19	1870.72	-0.48828	0.0479651	0.470421	0.327513
IGF1	179.42	700.57	1.96519	0.0479454	0.470421	0.327513
SMCO4	123.64	172.92	0.483929	0.0479681	0.470421	0.327513
LGALS3	3729.02	5551.46	0.574069	0.0481979	0.471628	0.326401
TRPV4	85.84	128.51	0.582208	0.048201	0.471628	0.326401
CAV2	1215.57	929.74	-0.386742	0.0482038	0.471628	0.326401
RGS3	1564.41	1143.66	-0.451951	0.0482572	0.471864	0.326183
TMEM130	32.54	17.85	-0.866538	0.0484745	0.473703	0.324494
TTC39C	255.16	366.65	0.523037	0.0485819	0.474466	0.323795
SPRYD4	143.43	227.85	0.667703	0.0486596	0.474938	0.323363
KLF10	1905.14	1385.66	-0.459325	0.0487623	0.475653	0.32271
AXIN2	33.83	57.42	0.762997	0.0490942	0.478602	0.320025
MDGA1	927.46	1335.88	0.52643	0.0491321	0.478683	0.319952
CPZ	186.99	271.55	0.538298	0.0491873	0.478932	0.319726
IL27RA	17.28	6.58	-1.3934	0.0492961	0.479703	0.319028
PLEKHH3	142.57	194.91	0.451115	0.0494198	0.480618	0.3182
SLC25A28	1732.33	2593.03	0.581925	0.049535	0.481448	0.31745
POLR3G	37.14	21.22	-0.807438	0.0496627	0.48237	0.31662
CNTN3	72.43	38.1	-0.926905	0.0497499	0.48237	0.31662
JCAD	1523.94	951.11	-0.680122	0.0497843	0.48237	0.31662
RGS16	90.58	158.99	0.811764	0.0498088	0.48237	0.31662
MAGED1	2959.88	2151.39	-0.460274	0.0497711	0.48237	0.31662
DOCK4	444.61	843.73	0.924248	0.0497439	0.48237	0.31662
ECE1	2285.35	3044.1	0.413603	0.0498761	0.482733	0.316293
MRPL38	366.81	608.95	0.731269	0.0499762	0.483123	0.315943
MLX	615.08	836.44	0.443486	0.0499542	0.483123	0.315943
PRSS23	6721.35	4149.63	-0.695768	0.0500679	0.48372	0.315406
GGT5	882.33	1288.69	0.546514	0.0501679	0.484108	0.315058
LRRC4C	4.3	15.49	1.84923	0.0501627	0.484108	0.315058
UBE2D4	99.05	158.66	0.679618	0.0502258	0.484378	0.314816
NIPAL1	4.01	12.84	1.67896	0.0503773	0.484971	0.314284
ZNF586	80.3	120.05	0.580197	0.0503496	0.484971	0.314284
PTPN14	702.55	412.5	-0.768218	0.0503182	0.484971	0.314284
LRPAP1	1497.15	2074.25	0.47037	0.050456	0.48544	0.313864
ANO1	5	18.46	1.88373	0.0504905	0.485483	0.313826
HSPH1	1359.65	1868.45	0.458603	0.0505847	0.485767	0.313572
CNDP2	2827.99	3781.56	0.419204	0.0506101	0.485767	0.313572
PLEKHF1	207.65	330.62	0.671036	0.0505517	0.485767	0.313572
SGO1	3.17	0.17	-4.1911	0.0506433	0.485798	0.313545
FAM111B	22.12	5.16	-2.09916	0.0506802	0.485863	0.313486
ENO1	36641.6	27319.3	-0.423559	0.0508208	0.486346	0.313054
TESK1	876.7	1242.97	0.503639	0.0507877	0.486346	0.313054
STARD13	1413.49	890.34	-0.666838	0.0508061	0.486346	0.313054
EBI3	147.91	222.16	0.586957	0.0508869	0.486691	0.312747
PTPRU	200.31	280.19	0.48418	0.0510992	0.48793	0.311642
C1QTNF1	12010.2	14747.5	0.296211	0.0512096	0.48793	0.311642
BACE2	577.28	844.2	0.548317	0.0511341	0.48793	0.311642
VDR	2278.85	1698.9	-0.4237	0.0512277	0.48793	0.311642
TXNDC5	4636.51	3835.12	-0.273766	0.0512209	0.48793	0.311642
DISP2	18.58	6.5	-1.51463	0.0512183	0.48793	0.311642
NRP1	3675.12	2089.54	-0.814603	0.0511238	0.48793	0.311642
OR2A7	45.98	23.2	-0.986837	0.0513343	0.488472	0.31116
FNDC1	13325.1	8914.46	-0.579926	0.051345	0.488472	0.31116
BIVM-ERCC5	35.41	0.18	-7.60393	0.0517615	0.489841	0.309945
CD82	11654.5	16081.2	0.464491	0.0516855	0.489841	0.309945
AGMO	12.55	3.99	-1.65287	0.0517086	0.489841	0.309945
MAN1A1	5734.04	9560.37	0.737515	0.0517543	0.489841	0.309945
PRDX1	4291.13	5977.16	0.478102	0.0516316	0.489841	0.309945
DEPDC1	9.61	2.3	-2.06407	0.0515575	0.489841	0.309945
OSTC	2964.46	2379.49	-0.317121	0.0516117	0.489841	0.309945
EIF4H	7509.25	5943.56	-0.337343	0.0515753	0.489841	0.309945
SLF1	43.8	25.46	-0.783015	0.0517067	0.489841	0.309945
AOC2	43.81	66.99	0.61286	0.0518104	0.490018	0.309788
RBMXL1	304.53	413.58	0.441617	0.0518732	0.490038	0.30977
P2RX7	136	245.29	0.850845	0.0518438	0.490038	0.30977
STK17A	1547.35	2090.61	0.434117	0.0519165	0.49016	0.309662
BTN2A2	631.24	802.34	0.346022	0.0520098	0.490755	0.309135
KCNS3	111.73	43.31	-1.36735	0.0521139	0.491194	0.308747
TCEA3	64.59	104.28	0.691083	0.0521171	0.491194	0.308747
CLMP	7736.85	5840.11	-0.405751	0.0522138	0.49182	0.308194
SPRY2	274.59	205.09	-0.420978	0.0522865	0.492052	0.307989
ESCO2	9.36	1.34	-2.8076	0.0523297	0.492052	0.307989
SERTAD4	48.59	10.89	-2.15823	0.0523148	0.492052	0.307989
LDOC1	260.07	169.94	-0.613873	0.0523832	0.492268	0.307798
SMPD2	116.11	185	0.67209	0.052432	0.492441	0.307646
SBF1	1746.3	2129.37	0.28613	0.0525798	0.49297	0.307179
STAT3	3634.07	4582.02	0.334397	0.0525653	0.49297	0.307179
CDK1	28.21	13.1	-1.10638	0.0525203	0.49297	0.307179
AP3B2	14.92	29.22	0.969518	0.0526144	0.493009	0.307145
CXCL8	61253.8	101789	0.732711	0.0528091	0.494504	0.30583
ADAM12	11074.9	6482.21	-0.772736	0.0528351	0.494504	0.30583
MTF1	711.37	1165.53	0.712324	0.052912	0.494867	0.305512
NFIA	127.44	72.63	-0.811233	0.052944	0.494867	0.305512
MEGF11	2.65	10.36	1.96455	0.0529657	0.494867	0.305512
SPRYD7	243.54	176.94	-0.460938	0.053015	0.495041	0.305359
PMCH	1.33	8.18	2.62448	0.0530629	0.495202	0.305217
BRAT1	429.55	631.22	0.555313	0.0531696	0.495395	0.305049
SLC41A1	1795	1325.04	-0.437946	0.0531754	0.495395	0.305049
MACC1	2.97	11.35	1.93322	0.0531307	0.495395	0.305049
HGH1	218.99	324.5	0.567371	0.0532436	0.495745	0.304742
FSIP1	28.6	14.48	-0.981683	0.0532791	0.49579	0.304702
CABLES2	98.94	137.24	0.472014	0.0533398	0.496069	0.304458
TNFRSF19	259.18	150.21	-0.786993	0.0533864	0.496217	0.304328
TXNIP	8775.33	5697.54	-0.623114	0.0535997	0.497914	0.302846
UGDH	2187.47	1622.13	-0.431372	0.0536419	0.498019	0.302754
ZFPM2	30.83	60.43	0.970583	0.0537241	0.498211	0.302587
NRCAM	71.55	110.56	0.627788	0.0537054	0.498211	0.302587
KCNJ8	18.94	7.53	-1.32996	0.0538568	0.498687	0.302172
TRIT1	200.21	143.76	-0.477815	0.05387	0.498687	0.302172
FBH1	1160.62	1490.52	0.36092	0.0538987	0.498687	0.302172
DPP9	1499.09	1092.82	-0.456032	0.0538464	0.498687	0.302172
TMOD2	136.25	71.49	-0.93039	0.0539301	0.498692	0.302168
MAD2L2	343.52	576.9	0.747922	0.054084	0.499333	0.30161
CDC26	445.18	603.81	0.439725	0.0541282	0.499333	0.30161
H1-2	188.92	406.55	1.10567	0.0541538	0.499333	0.30161
TMEM45A	1845.49	1107.4	-0.736828	0.0541019	0.499333	0.30161
SLC49A4	359.33	477.28	0.409523	0.0540668	0.499333	0.30161
OSR2	45.83	88.31	0.946244	0.0544009	0.500393	0.300689
TEPSIN	256.4	342.73	0.418658	0.0543167	0.500393	0.300689
KCTD1	133.67	88.92	-0.588129	0.0543661	0.500393	0.300689
MIIP	151.7	222.86	0.554887	0.0543952	0.500393	0.300689
IFT22	263.66	201.52	-0.387775	0.0544235	0.500393	0.300689
GNPTG	1558.48	2201.54	0.498376	0.0545432	0.501208	0.299982
STRADA	324.49	453.11	0.481659	0.054594	0.501391	0.299824
RCSD1	143.7	82.34	-0.803324	0.0547678	0.502701	0.29869
KIAA0825	18.31	7.95	-1.20398	0.0547991	0.502704	0.298688
CCL28	225.52	114.49	-0.97804	0.0548761	0.503124	0.298325
CNGA3	15.22	4.93	-1.62715	0.0549618	0.503339	0.298139
DEPDC7	65.24	40.56	-0.685534	0.0549594	0.503339	0.298139
TBC1D3K	36.83	16.64	-1.14613	0.0550479	0.503467	0.298029
SAV1	587.29	787.87	0.423879	0.0550692	0.503467	0.298029
UAP1L1	552.02	771.4	0.48276	0.0550373	0.503467	0.298029
ANKLE1	3.99	11.53	1.53039	0.055143	0.503857	0.297692
RCHY1	377.79	293.78	-0.362829	0.0551765	0.503879	0.297674
GAS1	951.42	670.76	-0.504279	0.0552501	0.504267	0.29734
NGLY1	299.04	378.6	0.340299	0.0552959	0.5044	0.297225
DAPK2	214.56	150.88	-0.507998	0.0554438	0.504968	0.296736
TAP1	33433.4	42345.5	0.340918	0.0554248	0.504968	0.296736
BUB1	22.64	7.78	-1.54004	0.0554519	0.504968	0.296736
SUGCT	50.06	28.22	-0.827017	0.0555432	0.505515	0.296266
MAGEH1	222.85	457.63	1.0381	0.0556175	0.505623	0.296174
GPR89B	56.96	35.78	-0.670899	0.0555933	0.505623	0.296174
HMX1	0.36	5.73	4.01172	0.0556912	0.506008	0.295843
BTN3A1	2196.25	3141.09	0.516221	0.0558403	0.506509	0.295413
FAM174C	219.44	395.71	0.850592	0.0558299	0.506509	0.295413
SDHA	2630.11	4189	0.67148	0.0558286	0.506509	0.295413
ZBED3	17.66	6.32	-1.48282	0.0560767	0.508368	0.293822
POSTN	1241.05	535.59	-1.21237	0.0561592	0.508445	0.293756
OSCAR	27.74	12.09	-1.19759	0.0562109	0.508445	0.293756
GABRE	41.04	19.82	-1.04982	0.0561913	0.508445	0.293756
ZFHX2	39.2	19.78	-0.986968	0.0561623	0.508445	0.293756
ZNF827	464.88	318.35	-0.546252	0.0563166	0.509116	0.293183
SMAGP	72.34	32.83	-1.1399	0.0563736	0.509134	0.293168
SENP2	573.85	429.62	-0.417619	0.0563816	0.509134	0.293168
PSRC1	39.87	21.97	-0.859852	0.0564195	0.509192	0.293118
ZNF552	96.45	55.81	-0.789112	0.0565666	0.509951	0.292472
RPS6KA5	53.59	103.94	0.955727	0.056562	0.509951	0.292472
GCH1	3921.76	5830	0.571994	0.0568316	0.510904	0.29166
ADAMTSL5	73.45	41.27	-0.831533	0.0568593	0.510904	0.29166
LZTFL1	164.09	112.87	-0.539818	0.0568014	0.510904	0.29166
SERPINA6	8.26	27.47	1.73387	0.0568025	0.510904	0.29166
SFXN1	866.75	682.53	-0.344718	0.0568619	0.510904	0.29166
ARHGEF11	1253.06	1697.78	0.438191	0.056795	0.510904	0.29166
MT2A	57721.8	84014.9	0.54153	0.0569168	0.511114	0.291483
USE1	47.73	78.75	0.722407	0.0570111	0.511676	0.291005
CRYGN	0.99	6.36	2.68157	0.0571331	0.512088	0.290655
CENPX	212.62	365.37	0.781052	0.0571035	0.512088	0.290655
NF2	703.92	527.39	-0.416549	0.057152	0.512088	0.290655
SPSB1	1015.04	1328.67	0.388449	0.0572175	0.512392	0.290398
RAD51	31.61	14.75	-1.09993	0.0573006	0.512852	0.290008
FGFRL1	531.59	763.84	0.522956	0.0575108	0.514448	0.288658
LRIG1	6201.89	3435.36	-0.852247	0.057651	0.515252	0.28798
SHOX2	338.77	502.24	0.568094	0.0576644	0.515252	0.28798
NEU1	1246.56	1649.03	0.403664	0.0577028	0.51531	0.287931
FZD5	70	133.44	0.930833	0.0578112	0.515752	0.287559
CCNA2	63.25	36.52	-0.792382	0.057816	0.515752	0.287559
UBE2C	22.93	7.73	-1.56951	0.0578704	0.515809	0.287511
PXDC1	1025.79	709.16	-0.532567	0.0578862	0.515809	0.287511
MMAA	369.94	478.68	0.371766	0.0579267	0.515885	0.287447
STXBP2	68.3	116.93	0.775665	0.0580891	0.516677	0.286781
KCNAB1	17.34	5.59	-1.63292	0.0581114	0.516677	0.286781
FZD4	540.42	725.13	0.424181	0.0580866	0.516677	0.286781
RNF115	663.46	522.22	-0.345335	0.058179	0.516994	0.286514
SLC25A42	112.85	76.62	-0.558666	0.0582247	0.517116	0.286412
BBS12	142.51	192.32	0.432498	0.0584694	0.517251	0.286298
EFEMP1	6453.91	3523.58	-0.873134	0.0583952	0.517251	0.286298
SLC66A1	553.59	685.04	0.307364	0.0583335	0.517251	0.286298
DNAJC17	52.47	85.22	0.699581	0.0583562	0.517251	0.286298
PPP2R2D	291.21	405.55	0.477844	0.0584162	0.517251	0.286298
KCNQ5	60.22	17.69	-1.76728	0.0584334	0.517251	0.286298
CCL13	192.51	108.67	-0.824967	0.0584958	0.517251	0.286298
WIPF3	6	15.28	1.34826	0.0583397	0.517251	0.286298
CHAMP1	398.51	227.63	-0.807888	0.0585918	0.517628	0.285983
ADAMTS4	7590.42	12794.7	0.753297	0.0586024	0.517628	0.285983
DIS3L	169.85	226.08	0.412523	0.0588091	0.518712	0.285073
HERC6	2913.85	3791.91	0.380001	0.0587842	0.518712	0.285073
UBE2O	865.46	1147.93	0.407502	0.0588423	0.518712	0.285073
BUB1B	13.69	4.61	-1.57129	0.0588535	0.518712	0.285073
ANXA4	1671.18	1319.64	-0.340728	0.0589252	0.519062	0.284781
RNF180	18.6	8.26	-1.17164	0.0590452	0.519273	0.284604
PCDH19	10.86	3.01	-1.85155	0.0590455	0.519273	0.284604
MTFR1	264.52	198.5	-0.41422	0.0589925	0.519273	0.284604
PGD	3676.1	4891.9	0.412221	0.0591841	0.520209	0.283822
FRK	21.96	10.22	-1.10416	0.0593116	0.520481	0.283595
PHKG2	156.79	245.57	0.64734	0.0592771	0.520481	0.283595
LIMD2	331.55	205.46	-0.690378	0.0592803	0.520481	0.283595
LSM4	378.66	569.91	0.589813	0.0593655	0.520671	0.283436
SCG5	157.4	71.91	-1.13028	0.0594242	0.520903	0.283243
C1orf198	634.15	945.4	0.576103	0.0594982	0.52127	0.282937
SMIM29	353.88	494.14	0.481655	0.0595352	0.521312	0.282902
ASPSCR1	172.93	278.85	0.689322	0.0596124	0.521705	0.282575
TEAD2	490.23	626.93	0.35484	0.0597128	0.521775	0.282517
COL27A1	757.86	346	-1.13113	0.0596991	0.521775	0.282517
STBD1	773.42	1091.7	0.497264	0.0597172	0.521775	0.282517
SORBS1	14.94	5.28	-1.50081	0.0598614	0.522753	0.281704
ITIH4	11.89	29.57	1.31439	0.0599469	0.523217	0.281318
DRGX	15.27	5.7	-1.42029	0.0599944	0.523349	0.281208
HMGA2	1145.1	616.62	-0.893022	0.0601504	0.524428	0.280315
BTBD3	121.71	76.56	-0.668803	0.0602413	0.524937	0.279893
LOC102724250	323.53	247.49	-0.386527	0.0606189	0.525555	0.279382
DERPC	419.7	629.85	0.585634	0.0605283	0.525555	0.279382
SRXN1	1644.3	2306.75	0.488393	0.0603854	0.525555	0.279382
VSTM4	501.31	738.64	0.559165	0.060665	0.525555	0.279382
CDIP1	884.55	681.33	-0.376601	0.0605529	0.525555	0.279382
IMPA2	556.94	818.17	0.55487	0.0604906	0.525555	0.279382
LIF	9011.9	6540.52	-0.462426	0.0606697	0.525555	0.279382
TARBP2	209.08	306	0.549489	0.0603595	0.525555	0.279382
ZNRF1	656.15	929.22	0.501983	0.0605727	0.525555	0.279382
DCAF5	1392.01	1077.6	-0.369344	0.060419	0.525555	0.279382
LRBA	463.32	338.09	-0.454629	0.0605424	0.525555	0.279382
SUCNR1	3.97	0.35	-3.48998	0.0607403	0.525761	0.279212
FHIP1A	14.94	35.09	1.23167	0.0607585	0.525761	0.279212
CLASRP	185.11	247.41	0.418504	0.0609607	0.526824	0.278334
CISH	25.7	48.43	0.914398	0.0610262	0.526824	0.278334
OR1Q1	2.83	0.17	-4.03515	0.0609799	0.526824	0.278334
PLPP4	104.09	48.55	-1.10043	0.0610442	0.526824	0.278334
SSPN	371.02	543.91	0.551859	0.0609172	0.526824	0.278334
NEMP1	615.79	926.83	0.589859	0.061131	0.527291	0.277949
SULT4A1	4.01	13.19	1.71654	0.0611689	0.527338	0.277911
ATP6V1G1	1615.93	2023.37	0.324391	0.0612208	0.527504	0.277774
SCX	30.57	59.6	0.963322	0.0613809	0.52832	0.277103
EMC2	776.42	1083.97	0.481421	0.0613486	0.52832	0.277103
NUTF2	803.57	633.36	-0.343401	0.0615028	0.528525	0.276934
FKBP2	337.25	562.78	0.738768	0.0614725	0.528525	0.276934
CTXN1	70.29	42.91	-0.71191	0.0614541	0.528525	0.276934
SLC6A15	462.18	721.82	0.643177	0.0615728	0.528688	0.2768
LGR4	2344.93	1354.12	-0.792192	0.0615871	0.528688	0.2768
SLC9A7	643.29	370.97	-0.79419	0.0616526	0.52897	0.276569
CLUAP1	273.63	213.06	-0.360928	0.0617799	0.52898	0.276561
TM4SF1	1385.85	843.77	-0.715851	0.0617105	0.52898	0.276561
STK32B	19.51	8.58	-1.18471	0.0618477	0.52898	0.276561
ZCCHC8	263.23	194.89	-0.433634	0.0618992	0.52898	0.276561
RARG	1563.21	2097.01	0.423822	0.0618837	0.52898	0.276561
FOSL1	2398.37	1754.99	-0.450596	0.0619069	0.52898	0.276561
MAK16	424.97	332.99	-0.351884	0.0618994	0.52898	0.276561
COG1	385.72	498.75	0.370768	0.0619154	0.52898	0.276561
SPAAR	3.91	0.35	-3.47064	0.0620347	0.529448	0.276176
PPAN-P2RY11	122.92	78.25	-0.651699	0.0620358	0.529448	0.276176
DAXX	1717.88	2437.03	0.504498	0.0626319	0.530425	0.275376
RNF168	434.45	554.19	0.351204	0.0629575	0.530425	0.275376
COL22A1	365.86	566.01	0.629551	0.0628558	0.530425	0.275376
ENKUR	14.79	5	-1.56469	0.0626254	0.530425	0.275376
ETHE1	300.87	438.02	0.541847	0.0630686	0.530425	0.275376
ABHD12	845.77	1178.95	0.479167	0.0623191	0.530425	0.275376
GNB1	9190.24	7246.86	-0.342747	0.0630323	0.530425	0.275376
B4GALNT3	71.93	204.97	1.51072	0.0627953	0.530425	0.275376
ID4	203.88	323.13	0.664346	0.0627717	0.530425	0.275376
METTL9	1954.92	2378.94	0.283205	0.0623721	0.530425	0.275376
PHYH	266.52	205.19	-0.377329	0.0627788	0.530425	0.275376
RHBDL2	164.09	105.43	-0.638249	0.0628641	0.530425	0.275376
ABITRAM	265.97	207.52	-0.357958	0.0625939	0.530425	0.275376
TRIM36	33.32	57.85	0.796041	0.0622448	0.530425	0.275376
PSMA2	2173.5	2942.25	0.436899	0.0624124	0.530425	0.275376
PMEPA1	3169.24	2494.29	-0.345508	0.0624819	0.530425	0.275376
RNPEPL1	610.59	894.53	0.55091	0.0624679	0.530425	0.275376
STAT2	8587.77	11025.2	0.360449	0.0628421	0.530425	0.275376
TPMT	309.63	427.97	0.466936	0.0627132	0.530425	0.275376
VASP	889.9	687.66	-0.371962	0.0629981	0.530425	0.275376
RNASEH2B	213.13	304.23	0.513388	0.0630147	0.530425	0.275376
TRIM45	21.18	38.09	0.846532	0.0627576	0.530425	0.275376
CASP9	150.65	222.67	0.56369	0.0627245	0.530425	0.275376
STK24	1697.32	2105.43	0.310858	0.0622841	0.530425	0.275376
PKMYT1	21.75	5.5	-1.98419	0.0628935	0.530425	0.275376
SLC16A4	936.68	1321.31	0.496343	0.0624496	0.530425	0.275376
PPM1F	643.82	495.19	-0.37867	0.0630613	0.530425	0.275376
USP6NL	324.93	238.92	-0.44362	0.0622041	0.530425	0.275376
MOK	112.78	77.8	-0.535641	0.063152	0.530575	0.275253
HDAC10	140.81	215.43	0.613438	0.0631444	0.530575	0.275253
ISM1	27.91	59.84	1.10042	0.0632006	0.530614	0.275221
MVB12A	430.09	646.97	0.589078	0.0632222	0.530614	0.275221
KCNS2	3.3	10.61	1.68618	0.0633554	0.53118	0.274758
BTG1	2925.23	3661	0.32369	0.0633423	0.53118	0.274758
POP1	170.53	114.74	-0.571643	0.0633901	0.531196	0.274746
LIME1	25.89	43.99	0.764604	0.063458	0.531489	0.274505
CAD	404.37	290.25	-0.478376	0.063505	0.531608	0.274409
BCAT1	2248.25	1416.93	-0.666034	0.0635696	0.531874	0.274191
KIAA0895	26.66	13.65	-0.96618	0.063653	0.532296	0.273847
GTF2H3	416.1	295.59	-0.49332	0.0637227	0.532351	0.273802
RHOH	1.99	7.91	1.98869	0.0637583	0.532351	0.273802
JPH2	285.36	70.73	-2.01234	0.0637508	0.532351	0.273802
FAM156B	271.18	164.98	-0.716916	0.0638313	0.532599	0.2736
PTGES	23178.8	37347.6	0.688207	0.0638539	0.532599	0.2736
ACOD1	184.42	38.82	-2.24811	0.0639208	0.532736	0.273488
ARID5B	2790.72	1988.39	-0.489039	0.0639363	0.532736	0.273488
LYPD1	15.94	35.55	1.15684	0.0641027	0.533007	0.273267
ETV1	148.12	214.98	0.537445	0.0641994	0.533007	0.273267
LSM8	231.87	303.88	0.390185	0.0641752	0.533007	0.273267
UQCRC1	1380.07	1895.88	0.458129	0.0640696	0.533007	0.273267
BTBD10	391.04	302.72	-0.369341	0.0641318	0.533007	0.273267
RIN1	184.28	283.01	0.618957	0.0641635	0.533007	0.273267
MED24	726.79	900.63	0.30938	0.0641244	0.533007	0.273267
MMS22L	37.98	19.17	-0.986888	0.064535	0.534604	0.271968
ANKRD36	18.62	6.55	-1.50662	0.0644891	0.534604	0.271968
LASP1	7338.31	5636.66	-0.380607	0.0645454	0.534604	0.271968
ANKRD36B	17.57	6.95	-1.33833	0.064557	0.534604	0.271968
PINK1	2558.37	2006.9	-0.350258	0.0644878	0.534604	0.271968
COL4A2	14454.8	10159.1	-0.508769	0.0646187	0.534634	0.271943
TAF9B	39.77	87.82	1.14282	0.0646268	0.534634	0.271943
SMPD4	813.91	638.35	-0.350528	0.0647102	0.53505	0.271606
CYP1B1	9077.18	15770	0.796865	0.0649188	0.535699	0.271079
MCC	988.27	1450.06	0.55314	0.0648804	0.535699	0.271079
PSAP	47334.1	61316	0.373384	0.0648225	0.535699	0.271079
C11orf52	20.58	38.88	0.918142	0.0649211	0.535699	0.271079
SLC7A11	1300.91	2280.87	0.810057	0.0649982	0.535788	0.271007
VMAC	33.1	54.51	0.719906	0.0649712	0.535788	0.271007
DHRS2	17.61	5.39	-1.70647	0.0650966	0.536326	0.270571
LRRC45	36.85	58.96	0.67828	0.0652945	0.536787	0.270198
AMFR	1990.68	2403.53	0.271896	0.0652898	0.536787	0.270198
BLM	12.08	2.25	-2.42099	0.065236	0.536787	0.270198
PDHX	686.86	873.28	0.346419	0.0653517	0.536787	0.270198
C19orf12	1415.77	1833.06	0.372675	0.0653504	0.536787	0.270198
TM2D2	1553.96	1253.98	-0.309436	0.0652667	0.536787	0.270198
AXIN1	305.74	410.75	0.425985	0.0654169	0.53705	0.269985
LINGO2	0.17	3.04	4.13827	0.0655514	0.53788	0.269314
MLLT3	235.61	318.48	0.434821	0.0656805	0.538121	0.26912
CYBRD1	3329.05	2569.5	-0.373621	0.0656767	0.538121	0.26912
GLP2R	10.56	3.29	-1.68368	0.065677	0.538121	0.26912
C4orf3	6396.47	5011.01	-0.352175	0.0658745	0.539437	0.268059
LSM6	187.3	290.72	0.634293	0.0660158	0.539502	0.268007
CES3	5.29	0.99	-2.41283	0.06595	0.539502	0.268007
CEP78	63.87	37.15	-0.781641	0.0659197	0.539502	0.268007
ZNF670	48.44	28.62	-0.75946	0.0659903	0.539502	0.268007
MARCHF9	30.2	49.96	0.726143	0.0661209	0.540087	0.267536
ANO4	6.64	1.3	-2.35419	0.0661887	0.540369	0.26731
SYCE1L	0.67	5.06	2.91754	0.0662324	0.540418	0.26727
DNAJB9	770.61	1156.4	0.585572	0.0662616	0.540418	0.26727
GIT1	412.48	528.59	0.357805	0.0663808	0.541117	0.266709
IGSF21	1.67	8.32	2.31599	0.066479	0.541644	0.266286
SPAG5	29.89	16.14	-0.889418	0.0665236	0.541735	0.266213
WDR62	14.32	5.61	-1.35233	0.0665996	0.542081	0.265936
EPHA5	21.53	6.89	-1.64475	0.0666774	0.542441	0.265647
GRAMD2B	593.05	393.32	-0.592467	0.0668342	0.543444	0.264845
NBPF14	1947.36	2507.15	0.364533	0.0670944	0.543919	0.264466
FBXL6	88.04	130.33	0.565836	0.0670148	0.543919	0.264466
PNP	790.58	556.38	-0.506845	0.0670713	0.543919	0.264466
CPA4	39.77	8.61	-2.20777	0.067094	0.543919	0.264466
LSG1	334.33	428.49	0.357997	0.0670111	0.543919	0.264466
KYNU	3294.15	5053.18	0.617285	0.0670232	0.543919	0.264466
HLA-DPA1	1712.45	3160.25	0.883983	0.0672643	0.544865	0.263711
GBA2	790.75	996.85	0.334153	0.0672785	0.544865	0.263711
CRABP1	3.96	14.34	1.85639	0.0674159	0.544901	0.263683
GRIK2	3.65	0.35	-3.36152	0.0674037	0.544901	0.263683
[truncated: 14,174 more rows]

## Sheet: KEGG DOWN
Category	Term	Genes	Count	List Total	Pop Hits	Pop Total	P-Value	-log10(p)	Benjamini	Fold Enrichment	Bonferroni	FDR	Fisher Exact
KEGG_PATHWAY	Hippo signaling pathway	0.0605	13	109	157	9496	1.94e-07	6.7122	3.93e-05	7.21	3.93e-05	3.83e-05	2.49e-08
KEGG_PATHWAY	Cytoskeleton in muscle cells	0.0651	14	109	233	9496	2.18e-06	5.66154	0.000221	5.23	0.000441	0.000215	3.93e-07
KEGG_PATHWAY	Hippo signaling pathway - multiple species	0.0279	6	109	29	9496	1.66e-05	4.77989	0.00112	18.02	0.00334	0.00109	7.63e-07
KEGG_PATHWAY	TGF-beta signaling pathway	0.0372	8	109	110	9496	0.000246	3.60906	0.0124	6.34	0.0485	0.0121	3.62e-05
KEGG_PATHWAY	Hypertrophic cardiomyopathy	0.0326	7	109	99	9496	0.000896	3.04769	0.0362	6.16	0.166	0.0353	0.000135
KEGG_PATHWAY	Cardiac muscle contraction	0.0279	6	109	87	9496	0.00306	2.51428	0.103	6.01	0.461	0.1	0.000473
KEGG_PATHWAY	Dilated cardiomyopathy	0.0279	6	109	105	9496	0.00681	2.16685	0.178	4.98	0.748	0.174	0.00128
KEGG_PATHWAY	MAPK signaling pathway	0.0465	10	109	300	9496	0.00705	2.15181	0.178	2.9	0.761	0.174	0.0023
KEGG_PATHWAY	Adrenergic signaling in cardiomyocytes	0.0326	7	109	154	9496	0.00813	2.08991	0.182	3.96	0.808	0.178	0.00193
KEGG_PATHWAY	Cell adhesion molecules	0.0326	7	109	160	9496	0.00972	2.01233	0.19	3.81	0.861	0.186	0.00239
KEGG_PATHWAY	p53 signaling pathway	0.0233	5	109	75	9496	0.0104	1.98297	0.19	5.81	0.878	0.186	0.00166
KEGG_PATHWAY	Pyrimidine metabolism	0.0186	4	109	58	9496	0.0281	1.55129	0.453	6.01	0.997	0.442	0.00433
KEGG_PATHWAY	MicroRNAs in cancer	0.0419	9	109	320	9496	0.0292	1.53462	0.453	2.45	0.997	0.442	0.0112
KEGG_PATHWAY	Cellular senescence	0.0279	6	109	157	9496	0.0332	1.47886	0.454	3.33	0.999	0.443	0.00929
KEGG_PATHWAY	Rap1 signaling pathway	0.0326	7	109	212	9496	0.0337	1.47237	0.454	2.88	0.999	0.443	0.0109
KEGG_PATHWAY	Tight junction	0.0279	6	109	170	9496	0.0443	1.3536	0.559	3.07	1	0.545	0.0134
KEGG_PATHWAY	Pancreatic cancer	0.0186	4	109	77	9496	0.0572	1.2426	0.656	4.53	1	0.64	0.0117
KEGG_PATHWAY	Axon guidance	0.0279	6	109	184	9496	0.0585	1.23284	0.656	2.84	1	0.64	0.0191
KEGG_PATHWAY	Nucleotide metabolism	0.0186	4	109	85	9496	0.0724	1.14026	0.693	4.1	1	0.676	0.0163
KEGG_PATHWAY	Estrogen signaling pathway	0.0233	5	109	139	9496	0.0737	1.13253	0.693	3.13	1	0.676	0.0217
KEGG_PATHWAY	Apelin signaling pathway	0.0233	5	109	140	9496	0.0752	1.12378	0.693	3.11	1	0.676	0.0223
KEGG_PATHWAY	Colorectal cancer	0.0186	4	109	87	9496	0.0765	1.11634	0.693	4.01	1	0.676	0.0177
KEGG_PATHWAY	Bladder cancer	0.014	3	109	41	9496	0.0789	1.10292	0.693	6.37	1	0.676	0.0114
KEGG_PATHWAY	Adherens junction	0.0186	4	109	93	9496	0.0893	1.04915	0.711	3.75	1	0.694	0.022

## Sheet: KEGG UP
Category	Term	Genes	Count	List Total	Pop Hits	Pop Total	P-Value	-log10(p)	Benjamini	Fold Enrichment	Bonferroni	FDR	Fisher Exact
KEGG_PATHWAY	Inflammatory bowel disease	0.068	10	96	66	9496	1.58e-08	7.80134	3.5e-06	14.99	3.5e-06	3.1e-06	9.15e-10
KEGG_PATHWAY	Cytokine-cytokine receptor interaction	0.1088	16	96	298	9496	2.28e-07	6.64207	2.51e-05	5.31	5.03e-05	2.23e-05	4.07e-08
KEGG_PATHWAY	Rheumatoid arthritis	0.068	10	96	95	9496	3.96e-07	6.4023	2.92e-05	10.41	8.75e-05	2.59e-05	3.45e-08
KEGG_PATHWAY	Tuberculosis	0.0748	11	96	182	9496	1.29e-05	4.88941	0.000572	5.98	0.00285	0.000507	2.03e-06
KEGG_PATHWAY	Leishmaniasis	0.0544	8	96	79	9496	1.29e-05	4.88941	0.000572	10.02	0.00285	0.000507	1.18e-06
KEGG_PATHWAY	Toxoplasmosis	0.0544	8	96	112	9496	0.000124	3.90658	0.00456	7.07	0.027	0.00404	1.63e-05
KEGG_PATHWAY	Mineral absorption	0.0408	6	96	61	9496	0.000345	3.46218	0.0109	9.73	0.0733	0.00965	3.23e-05
KEGG_PATHWAY	Allograft rejection	0.034	5	96	39	9496	0.000591	3.22841	0.0163	12.68	0.123	0.0145	4.17e-05
KEGG_PATHWAY	Type I diabetes mellitus	0.034	5	96	44	9496	0.000939	3.02733	0.0226	11.24	0.188	0.0201	7.56e-05
KEGG_PATHWAY	Graft-versus-host disease	0.034	5	96	45	9496	0.00102	2.9914	0.0226	10.99	0.202	0.0201	8.44e-05
KEGG_PATHWAY	Wnt signaling pathway	0.0544	8	96	174	9496	0.00175	2.75696	0.0352	4.55	0.321	0.0312	0.000364
KEGG_PATHWAY	IL-17 signaling pathway	0.0408	6	96	95	9496	0.00257	2.59007	0.0473	6.25	0.434	0.042	0.000384
KEGG_PATHWAY	Systemic lupus erythematosus	0.0476	7	96	144	9496	0.00315	2.50169	0.0535	4.81	0.502	0.0475	0.000617
KEGG_PATHWAY	Staphylococcus aureus infection	0.0408	6	96	102	9496	0.0035	2.45593	0.0552	5.82	0.539	0.049	0.000563
KEGG_PATHWAY	Asthma	0.0272	4	96	32	9496	0.0039	2.40894	0.0574	12.36	0.578	0.051	0.000284
KEGG_PATHWAY	Epstein-Barr virus infection	0.0544	8	96	205	9496	0.00438	2.35853	0.0606	3.86	0.621	0.0537	0.00107
KEGG_PATHWAY	Hippo signaling pathway	0.0476	7	96	157	9496	0.00481	2.31785	0.0626	4.41	0.656	0.0555	0.00103
KEGG_PATHWAY	Influenza A	0.0476	7	96	173	9496	0.00766	2.11577	0.094	4	0.817	0.0834	0.0018
KEGG_PATHWAY	Antigen processing and presentation	0.034	5	96	82	9496	0.00907	2.04239	0.105	6.03	0.867	0.0929	0.0014
KEGG_PATHWAY	Coronavirus disease - COVID-19	0.0544	8	96	238	9496	0.0097	2.01323	0.105	3.32	0.884	0.0929	0.00275
KEGG_PATHWAY	Herpes simplex virus 1 infection	0.0476	7	96	183	9496	0.00996	2.00174	0.105	3.78	0.89	0.0929	0.00248
KEGG_PATHWAY	Intestinal immune network for IgA production	0.0272	4	96	50	9496	0.0135	1.86967	0.128	7.91	0.951	0.114	0.00158
KEGG_PATHWAY	Malaria	0.0272	4	96	50	9496	0.0135	1.86967	0.128	7.91	0.951	0.114	0.00158
KEGG_PATHWAY	Th1 and Th2 cell differentiation	0.034	5	96	93	9496	0.0139	1.85699	0.128	5.32	0.955	0.114	0.00245
KEGG_PATHWAY	Pathways in cancer	0.0816	12	96	533	9496	0.0171	1.767	0.145	2.23	0.978	0.129	0.00724
KEGG_PATHWAY	Hematopoietic cell lineage	0.034	5	96	100	9496	0.0178	1.74958	0.145	4.95	0.981	0.129	0.00336
KEGG_PATHWAY	Viral protein interaction with cytokine and cytokine receptor	0.034	5	96	100	9496	0.0178	1.74958	0.145	4.95	0.981	0.129	0.00336
KEGG_PATHWAY	Amoebiasis	0.034	5	96	103	9496	0.0196	1.70774	0.149	4.8	0.987	0.132	0.00382
KEGG_PATHWAY	Chagas disease	0.034	5	96	103	9496	0.0196	1.70774	0.149	4.8	0.987	0.132	0.00382
KEGG_PATHWAY	Necroptosis	0.0408	6	96	159	9496	0.0214	1.66959	0.158	3.73	0.992	0.14	0.00538
KEGG_PATHWAY	Th17 cell differentiation	0.034	5	96	109	9496	0.0236	1.62709	0.168	4.54	0.995	0.149	0.00486
KEGG_PATHWAY	Basal cell carcinoma	0.0272	4	96	63	9496	0.025	1.60206	0.173	6.28	0.996	0.153	0.0037
KEGG_PATHWAY	TNF signaling pathway	0.034	5	96	119	9496	0.0312	1.50585	0.206	4.16	0.999	0.182	0.00702
KEGG_PATHWAY	Fc epsilon RI signaling pathway	0.0272	4	96	69	9496	0.0316	1.50031	0.206	5.73	0.999	0.182	0.00513
KEGG_PATHWAY	Viral myocarditis	0.0272	4	96	70	9496	0.0328	1.48413	0.207	5.65	0.999	0.184	0.0054
KEGG_PATHWAY	Pertussis	0.0272	4	96	78	9496	0.0431	1.36552	0.264	5.07	1	0.235	0.00791
KEGG_PATHWAY	Proteoglycans in cancer	0.0408	6	96	204	9496	0.0535	1.27165	0.32	2.91	1	0.283	0.0171
KEGG_PATHWAY	Alcoholic liver disease	0.034	5	96	144	9496	0.0561	1.25104	0.326	3.43	1	0.289	0.0152
KEGG_PATHWAY	Gastric cancer	0.034	5	96	150	9496	0.0633	1.1986	0.359	3.3	1	0.318	0.0178
KEGG_PATHWAY	Cushing syndrome	0.034	5	96	155	9496	0.0696	1.15739	0.385	3.19	1	0.341	0.0202
KEGG_PATHWAY	mTOR signaling pathway	0.034	5	96	158	9496	0.0736	1.13312	0.395	3.13	1	0.351	0.0218
KEGG_PATHWAY	Cell adhesion molecules	0.034	5	96	160	9496	0.0763	1.11748	0.395	3.09	1	0.351	0.0229
KEGG_PATHWAY	Neuroactive ligand-receptor interaction	0.0544	8	96	370	9496	0.0769	1.11407	0.395	2.14	1	0.351	0.0333
KEGG_PATHWAY	Melanogenesis	0.0272	4	96	101	9496	0.0803	1.09528	0.403	3.92	1	0.358	0.019
KEGG_PATHWAY	JAK-STAT signaling pathway	0.034	5	96	168	9496	0.0876	1.0575	0.426	2.94	1	0.378	0.0275
KEGG_PATHWAY	Arginine and proline metabolism	0.0204	3	96	50	9496	0.0891	1.05012	0.426	5.93	1	0.378	0.0139
KEGG_PATHWAY	Hepatocellular carcinoma	0.034	5	96	170	9496	0.0905	1.04335	0.426	2.91	1	0.378	0.0287
KEGG_PATHWAY	Toll-like receptor signaling pathway	0.0272	4	96	109	9496	0.0957	1.01909	0.441	3.63	1	0.391	0.0244
KEGG_PATHWAY	TGF-beta signaling pathway	0.0272	4	96	110	9496	0.0977	1.01011	0.441	3.6	1	0.391	0.0251
