# Supplementary material
Source: Research Square preprint supplement (doi:10.21203/rs.3.rs-9652440/v1)
Supplement: Supplementary file 1 [file d2fb5b37fe7d7bd19cf8b87a.docx]

**Supplementary Fig. 1** **DIA-MS and RNA-seq analysis of RASFs following 4mix stimulation.** **a** Volcano plot of transcription factor proteins differentially expressed in nuclear extracts of RASFs treated with 4mix (TNF-α, IL-1β, IFN-γ, and TGF-β1) compared with vehicle (n = 3, |log2FC| > 0.65, p < 0.05). **b** Volcano plot of DEGs in RASFs following 4mix stimulation compared with vehicle (n = 3, |log2FC| > 1.0, q < 0.05). **c** KEGG pathway enrichment analysis of DEGs. Top 10 pathways (q < 0.05) are shown.

**Supplementary Fig. 2 STAT1 binding to the TEAD4 promoter. ChIP-seq data from ChIP-Atlas showing STAT1 binding at the TEAD4 promoter in IFN-γ–stimulated cells (Set-2, HeLa, and HuH-7).**

**Supplementary Fig. 3 Transcriptomic and signaling analyses of RASFs following TEAD or YAP/TAZ knockdown.** **a,b** KEGG pathway enrichment analysis of differentially expressed genes (DEGs) in 4mix-stimulated RASFs transfected with siTEAD1/3/4 (**a**) or siYAP/TAZ (**b**) compared with siControl. The top enriched pathways (p < 0.05) are shown.

**Supplementary Fig. 4 Histological and therapeutic evaluation of CIA treated with pan-TEAD inhibitor K975 and TNF blockade. a** Higher-magnification H&E images corresponding to Figure 5C, used for assessment of inflammation and bone erosion scores. **b** Representative Safranin O staining of articular cartilage. **c** Immunohistochemical staining for fibroblast activation protein (FAP) in hind paws. FAP staining intensity was scored as 0 (none), 1 (weak), or 2 (strong) using anti-FAP antibodies. n = 6 per group. Data are shown as mean ± SEM; one-way ANOVA with Dunnett’s test. *P < 0.05. **d** Therapeutic CIA model. Treatment was initiated on day 31 after disease onset with K975 (300 mg/kg) with or without etanercept (ETN, 3 mg/kg, intraperitoneally on days 31, 34, 37, and 40). n = 8 per group. Data are shown as mean ± SEM; two-way ANOVA with Bonferroni’s test. ****P < 0.0001.

**Supplementary Table 1 Clinical information of RA and OA patients for synovial tissue samples included in this study.** Anti-citrullinated protein/peptide antibody (ACPA), Biological disease-modifying antirheumatic drug (bDMARD), C-reactive protein (CRP), Conventional synthetic disease-modifying antirheumatic drug (csDMARD), Rheumatoid factor (RF).

**Supplementary Table 2 Primer sequences used for qPCR analysis.**

**Supplementary Table 3 DIA-MS data of transcription factors up- or downregulated by 4mix in nuclear extracts of RASFs (|log2FC| < 1.0 and P < 0.05).**

**Supplementary Table 4 RNA-seq data of RASFs treated with Veh or 4mix for 24 hours.** DEGs, KEGG pathway enrichment analysis, and wPGSA are included.

**Supplementary Table 5 wPGSA analysis of scRNA-seq data from synovial fibroblasts of patients with active or remission-phase RA.** T-scores and q-values are listed.

**Supplementary Table 6 RNA-seq data of RASFs pre-treated with siCtrl or siTEAD4 for 72 hours and treated with 4mix for 24 hours.** DEGs, KEGG pathway enrichment analysis, and gene module analysis are included.

**Supplementary Table 7 RNA-seq data of RASFs pre-treated with siCtrl or siTEAD1/3/4 for 72 hours and treated with 4mix for 24 hours.** DEGs, KEGG pathway enrichment analysis, and gene module analysis are included.

**Supplementary Table 8 RNA-seq data of RASFs pre-treated with siCtrl or siYAP/TAZ for 72 hours and treated with 4mix for 24 hours.** DEGs, KEGG pathway enrichment analysis, and gene module analysis are included.
