# Supplementary material
Source: Research Square preprint supplement (doi:10.21203/rs.3.rs-9652440/v1)
Supplement: Supplementary file 2 [file 334f5dcf7b1d6e1db795cd59.xlsx]

## Sheet: Sheet1
Supplementary Table 2.Primers used in qPCR.
Gene	Forward	Reverse
Human GAPDH	5’-GTCTCCTCTGACTTCAACAGCG-3’	5’-ACCACCCTGTTGCTGTAGCCAA-3’
Human TEAD1	5’-ATGCCAACCATTCTTACAGTGAC-3’	5’-ACAGTTCCTTTAAGCCACCTTTC-3’
Human TEAD3	5’-TGGACCCTCTCAGGACATCAA-3’	5’-CCAGGGGCTCATAACTGCTG-3’
Human TEAD4	5’-GGACACTACTCTTACCGCATCC-3’	5’-TCAAAGACATAGGCAATGCACA-3’
Human IRF1	5’-GCAGCTACACAGTTCCAGG-3’	5’-GTCCTCAGGTAATTTCCCTTCCT-3’
Human IL6	5’-TCGACGGCATCTCAGCCCTGAG-3’	5’-AGGTTGTTTTCTGCCAGTGCCTCTT-3’
Human CCL2	5’-ATCACCAGCAGCAAGTGTC-3’	5’-AGGTGGTCCATGGAATCCTG-3’
Human ANKRD1	5’-AGCGCCCGAGATAAGTTGCT-3’	5’-CACCAGATCCATCGGCGTCT-3’
Human CCN1	5’-AGCCTCGCATCCTATACAACC-3’	5’-TTCTTTCACAAGGCGGCACTC-3’
Human CTGF	5’-GCAGGCTAGAGAAGCAGAGC-3’	5’-ATGTCTTCATGCTGGTGCAG-3’
Human COMP	5’- GCAGACAAGGTGGTAGACAAGA-3’	5’-GCCTGGGTCGCTGTTCATT-3’
Human PRELP	5’-CAGCCAACAAGACGACCAAGA-3’	5’-CAGTCAGGGAAGATAGATGGAGG-3’
Human TGFBR2	5’-ACCACTGGGAGTTGCCATATCT-3’	5’-TCCCAGGTTGAACTCAGCTTCT-3’
Human IL1R1	5’-AGAGGAAAACAAACCCACAAGG-3’	5’- CTGGCCGGTGACATTACAGAT-3’
