# Supplementary material
Source: Research Square preprint supplement (doi:10.21203/rs.3.rs-9652440/v1)
Supplement: Supplementary file 2 [file fbcd4e7bd412541ee61f8c67.pdf]

# Supplementary Fig. 1

**a**

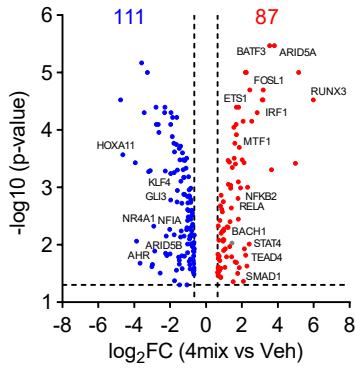

**b**

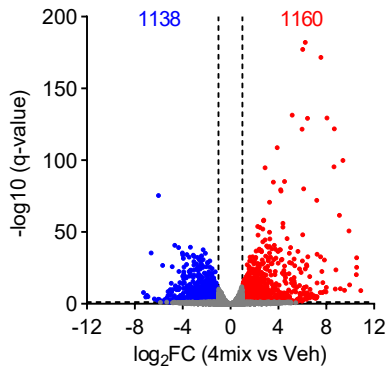

**c**

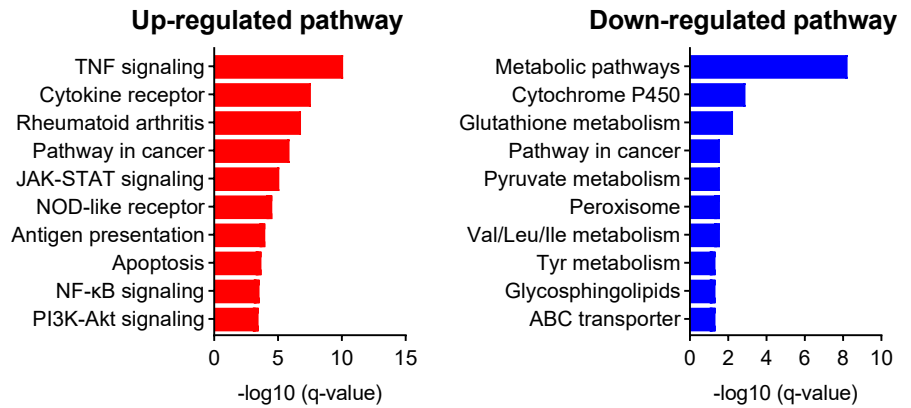

**Supplementary Fig. 1 DIA-MS and RNA-seq analysis of RASFs following 4mix stimulation. a** Volcano plot of transcription factor proteins differentially expressed in nuclear extracts of RASFs treated with 4mix (TNF- $\alpha$ , IL-1 $\beta$ , IFN- $\gamma$ , and TGF- $\beta$ 1) compared with vehicle (n = 3,  $|\log_2FC| > 0.65$ ,  $p < 0.05$ ). **b** Volcano plot of DEGs in RASFs following 4mix stimulation compared with vehicle (n = 3,  $|\log_2FC| > 1.0$ ,  $q < 0.05$ ). **c** KEGG pathway enrichment analysis of DEGs. Top 10 pathways ( $q < 0.05$ ) are shown.

# Supplementary Fig. 2

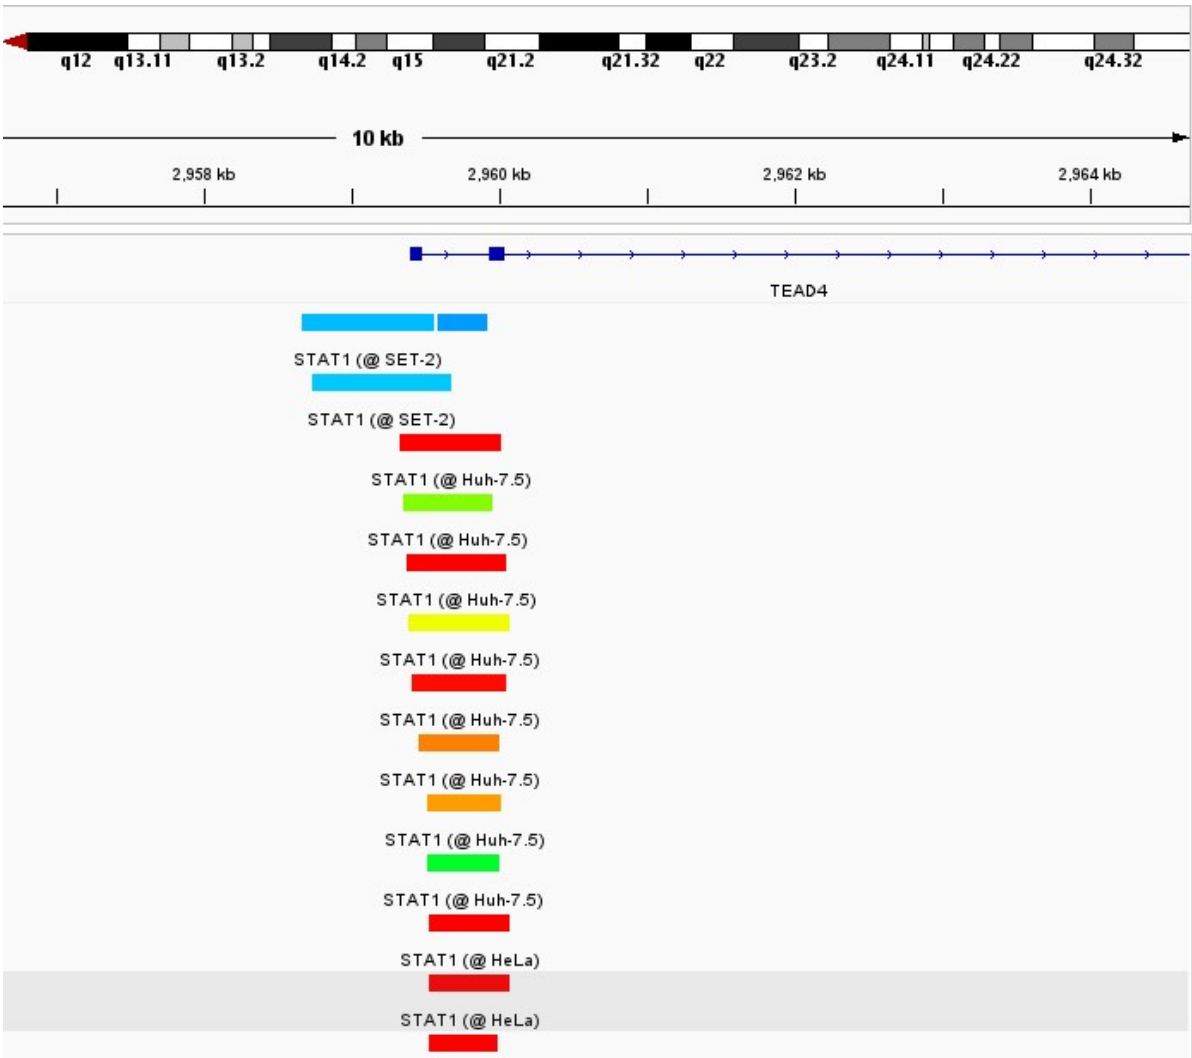

**Supplementary Fig. 2** STAT1 binding to the TEAD4 promoter. ChIP-seq data from ChIP-Atlas showing STAT1 binding at the TEAD4 promoter in IFN- $\gamma$ -stimulated cells (Set-2, HeLa, and HuH-7).

# Supplementary Fig. 3

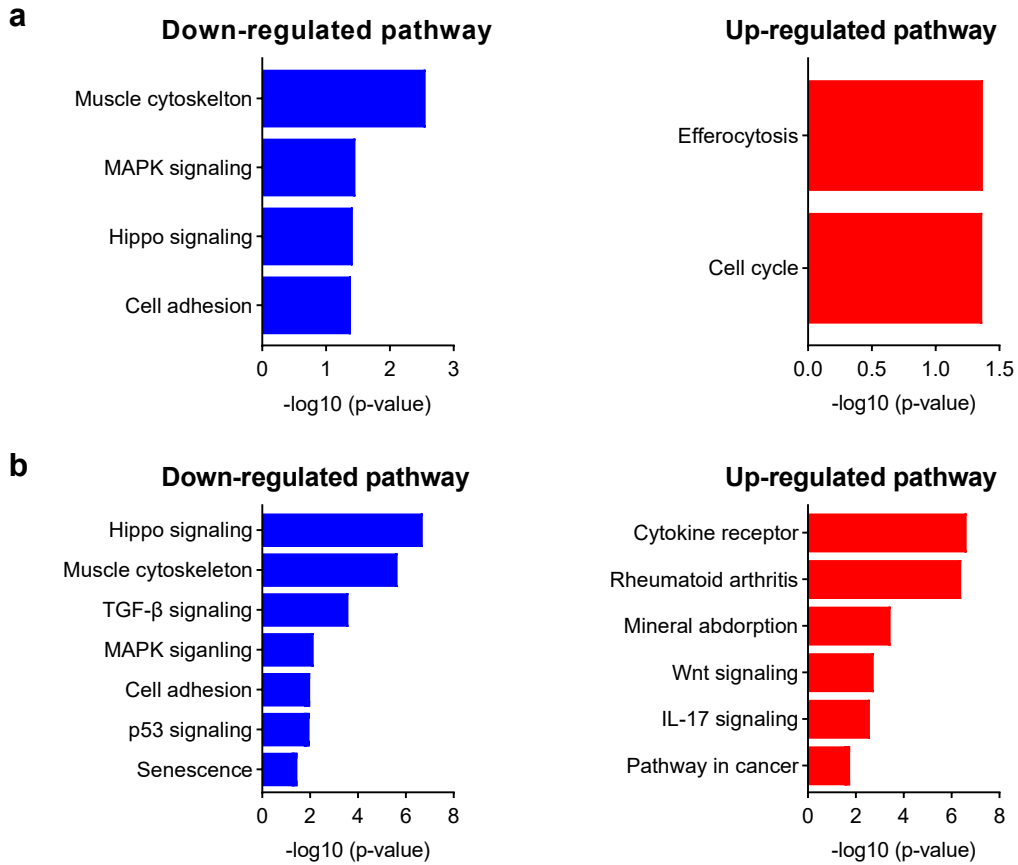

**Supplementary Fig. 3** Transcriptomic and signaling analyses of RASFs following TEAD or YAP/TAZ knockdown. **a,b** KEGG pathway enrichment analysis of differentially expressed genes (DEGs) in 4mix-stimulated RASFs transfected with siTEAD1/3/4 (**a**) or siYAP/TAZ (**b**) compared with siControl. The top enriched pathways ( $p < 0.05$ ) are shown.

# Supplementary Fig. 4

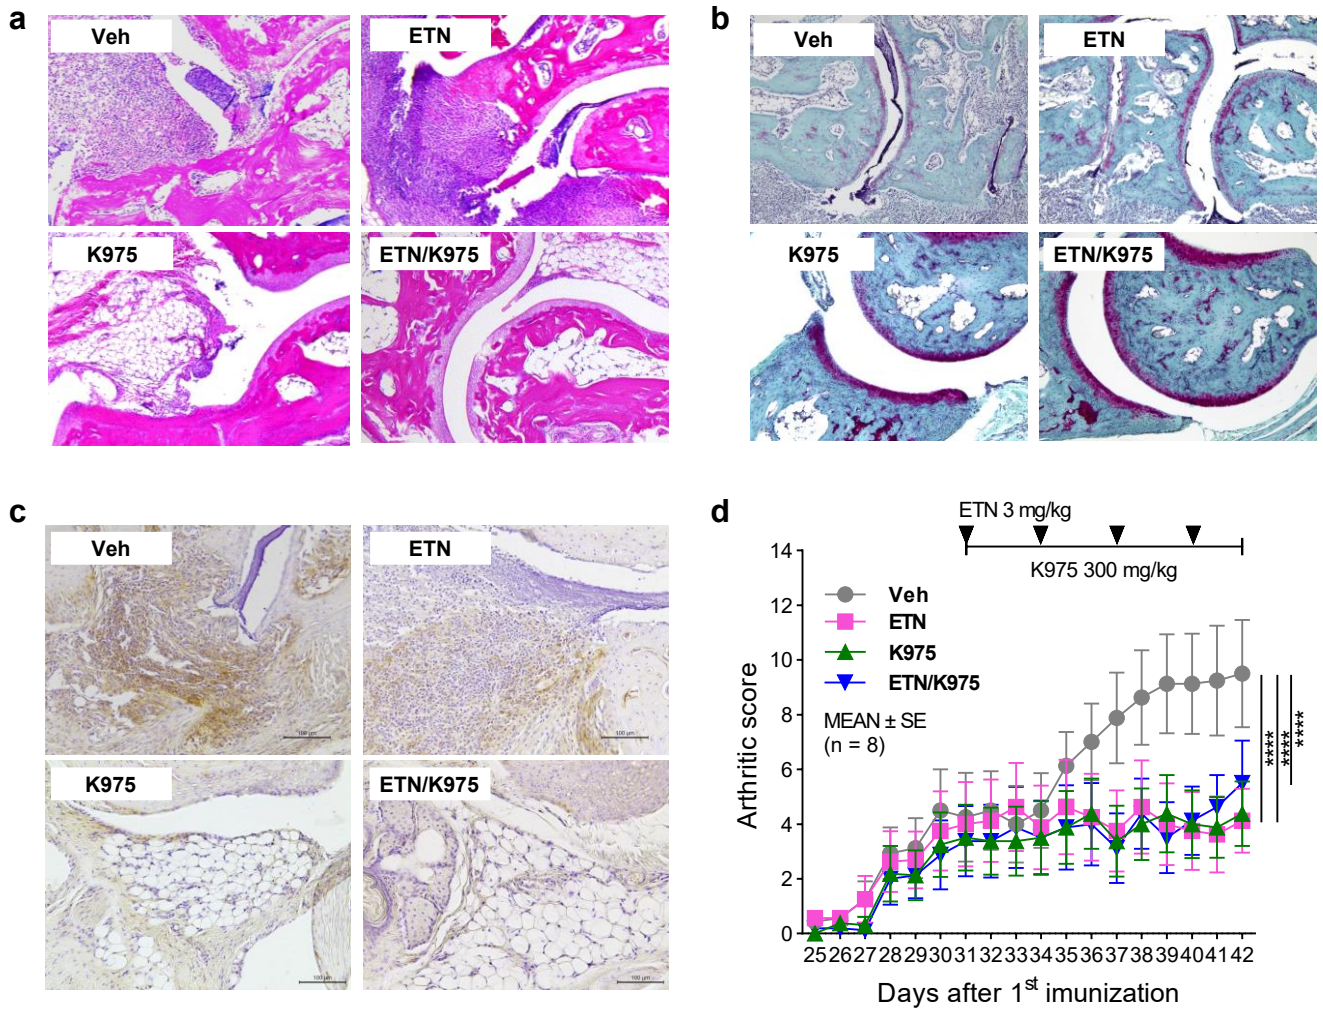

**Supplementary Fig. 4 Histological and therapeutic evaluation of CIA treated with pan-TEAD inhibitor K975 and TNF blockade.** **a** Higher-magnification H&E images corresponding to Figure 5C, used for assessment of inflammation and bone erosion scores. **b** Representative Safranin O staining of articular cartilage. **c** Immunohistochemical staining for fibroblast activation protein (FAP) in hind paws. FAP staining intensity was scored as 0 (none), 1 (weak), or 2 (strong) using anti-FAP antibodies.  $n = 6$  per group. Data are shown as mean  $\pm$  SEM; one-way ANOVA with Dunnett's test.  $*P < 0.05$ . **d** Therapeutic CIA model. Treatment was initiated on day 31 after disease onset with K975 (300 mg/kg) with or without etanercept (ETN, 3 mg/kg, intraperitoneally on days 31, 34, 37, and 40).  $n = 8$  per group. Data are shown as mean  $\pm$  SEM; two-way ANOVA with Bonferroni's test.  $****P < 0.0001$ .
