# Supplementary material
Source: Research Square preprint supplement (doi:10.21203/rs.3.rs-9652440/v1)
Supplement: Supplementary file 3 [file 6cebc9ad3de6a95d83245d5b.xlsx]

## Sheet: siTEAD1_3_4 (2)
Gene Symbol	siCtrl Average Read Count	siTEAD1_3_4 Average Read Count	log2 (siTEAD1_3_4 / siCtrl)	Pvalue(siTEAD1_3_4 / siCtrl)	Qvalue (siTEAD1_3_4 / siCtrl)	-log10(q-valure)
NLRP10	12	0.17	-6.11367	0.000271561	0.0159409	1.79749
MYOCD	192.52	7.05	-4.77127	4.54061e-29	7.30312e-25	24.1365
ANKRD1	399.15	22.31	-4.16144	0.000197654	0.0128188	1.89215
SSTR1	40.17	3.84	-3.38759	2.7335e-06	0.000477887	3.32067
KRT34	68.77	7.59	-3.17957	2.24658e-09	1.2905e-06	5.88924
SERPINA9	2173.99	252.58	-3.10554	0.000293101	0.0165994	1.77991
DKK1	556.61	65.04	-3.09728	2.49555e-09	1.38408e-06	5.85884
P2RY1	29.63	3.55	-3.06198	0.000196236	0.0128065	1.89257
TRPC4	130.76	15.87	-3.04233	3.173e-07	8.36632e-05	4.07747
GRIA1	15.22	1.91	-2.99431	0.00107488	0.0412608	1.38446
CCN2	11771.5	1527.8	-2.94576	4.19208e-12	7.49172e-09	8.12542
HAS2	4072.4	578.15	-2.81636	0.000693535	0.0299861	1.52308
KRTAP2-3	28.33	4.13	-2.77731	5.13815e-05	0.00456585	2.34048
IGF2	108.15	17.11	-2.66048	1.57565e-06	0.000305173	3.51545
KCNJ8	19.8	3.2	-2.62998	0.000750623	0.0318549	1.49682
RIPOR3	154.31	26.55	-2.53901	1.14803e-09	7.6937e-07	6.11386
KCNC3	49.72	8.71	-2.5134	7.98345e-06	0.00116733	2.93281
BMPER	135.28	23.92	-2.49962	3.68518e-07	9.40833e-05	4.02649
TEAD4	139.8	25.1	-2.47786	1.76157e-10	1.66665e-07	6.77816
TEAD3	1110.41	203.56	-2.44755	1.04618e-15	5.60891e-12	11.2511
REEP2	36.14	6.67	-2.4377	0.000505339	0.0241183	1.61765
MYB	40.09	7.82	-2.35777	0.00132287	0.0483679	1.31544
CHCHD10	54.1	11.37	-2.25066	0.000298095	0.0166532	1.7785
RAB3B	661.87	139.26	-2.24876	2.69768e-11	3.09925e-08	7.50874
TGFA	410.56	92.04	-2.15727	1.0208e-06	0.000218915	3.65972
SH3RF3	38.32	8.77	-2.12787	0.00094957	0.0377108	1.42353
NTM	230.63	53.05	-2.12014	6.0226e-10	5.09829e-07	6.29258
BEST3	40.9	9.55	-2.09843	1.78617e-05	0.00216933	2.66367
COL10A1	85.29	20.73	-2.04074	1.83295e-06	0.000335012	3.47494
KCNH1	107.12	26.25	-2.02888	0.000290555	0.0165719	1.78063
TLN1	7174.52	1760.85	-2.02661	3.86306e-09	2.00431e-06	5.69804
PABPC4	876.88	216.33	-2.01915	1.29592e-17	1.04218e-13	12.9821
ACLY	8199.01	2090.54	-1.97158	3.9302e-06	0.000638518	3.19483
PDZK1IP1	159.57	41.35	-1.94842	1.69586e-05	0.00208215	2.68149
AMZ1	87.5	23.27	-1.91105	1.53052e-06	0.000300205	3.52258
EVI5L	229.3	61.4	-1.9009	1.49414e-08	6.49505e-06	5.18742
TNFSF15	172.36	46.85	-1.87947	0.000303938	0.0167991	1.77471
PTPRF	943.33	261.9	-1.84873	5.22483e-05	0.00461737	2.33561
SDC3	822.96	232.54	-1.82332	1.97527e-10	1.76501e-07	6.75325
TAGLN	7810.42	2236.7	-1.80403	1.55058e-05	0.00196374	2.70692
ATP2C1	2566.96	736.1	-1.80208	1.24843e-12	3.34662e-09	8.47539
GPRC5B	77.57	22.31	-1.79798	7.86039e-05	0.00638518	2.19483
UBASH3B	373.4	108.21	-1.78685	1.83803e-08	7.58022e-06	5.12032
ALDH1A2	51.37	15.28	-1.74881	0.000222854	0.0140564	1.85212
DSP	470.04	142.84	-1.71832	0.000183954	0.0122769	1.91091
SLC22A2	333.67	101.42	-1.7181	9.2403e-05	0.00728534	2.13755
FLNC	3370.73	1027.51	-1.7139	7.3781e-08	2.6371e-05	4.57887
CCDC3	94.87	29.03	-1.70845	1.86088e-07	5.64724e-05	4.24816
TPD52	49.76	15.27	-1.70428	0.000573559	0.0263575	1.5791
LOXL4	800.72	247.59	-1.69335	2.71353e-06	0.000477887	3.32067
HSPB6	340.98	105.73	-1.68931	8.21356e-11	8.80712e-08	7.05517
CCN3	77.21	24.3	-1.66784	7.55912e-06	0.00111542	2.95256
LRP6	438.69	139	-1.6581	1.46464e-08	6.49505e-06	5.18742
LY6K	156.1	50.12	-1.63888	0.000245817	0.0148726	1.82761
TGM2	29899.3	9722.95	-1.62064	3.49693e-07	9.07171e-05	4.04231
LCLAT1	191.08	62.88	-1.60363	1.7175e-10	1.66665e-07	6.77816
HOXA4	75.85	25.11	-1.59472	0.000250074	0.0150608	1.82215
MAP3K7CL	141.44	46.94	-1.59147	9.98796e-06	0.00138511	2.85851
SNTB1	436.85	148.81	-1.55367	3.54412e-05	0.00351875	2.45361
SELPLG	283.96	96.74	-1.55351	4.60947e-09	2.31684e-06	5.6351
DUSP3	2868.38	986.88	-1.53928	2.10319e-11	2.60213e-08	7.58467
FGD4	101.91	35.25	-1.53168	6.72218e-05	0.00560205	2.25165
LRRN3	158.98	55.53	-1.51761	0.000251887	0.0150608	1.82215
ATP13A2	830.49	290.93	-1.51328	1.67974e-09	1.00063e-06	5.99973
SLC22A3	1070.43	375.58	-1.51102	4.12113e-06	0.00065628	3.18291
KIRREL3	237.57	84.74	-1.48727	3.83074e-06	0.000628711	3.20155
MBP	74.45	26.97	-1.4647	0.000401839	0.0203886	1.69061
C5orf46	49.02	17.95	-1.44966	0.000839896	0.0344615	1.46267
PHYHD1	136.73	50.09	-1.44868	1.79384e-05	0.00216933	2.66367
BATF3	168.71	62.06	-1.44277	1.87411e-05	0.00223283	2.65115
CRIM1	3555.16	1314.06	-1.43588	7.11882e-07	0.00016357	3.7863
IL1R1	3163.55	1171.08	-1.4337	3.65246e-08	1.46865e-05	4.83308
PRKAA2	54.88	20.38	-1.42894	0.000941646	0.0375817	1.42502
DLC1	1024.64	381.44	-1.42559	5.86381e-06	0.000898224	3.04662
PLCB4	393.84	147.18	-1.42004	3.85405e-08	1.51191e-05	4.82047
RETREG1	243.72	91.08	-1.41999	0.000282592	0.0163243	1.78716
AMIGO2	2328.45	884.64	-1.39621	0.000567319	0.0261455	1.5826
KLF2	119.65	45.48	-1.39539	9.53905e-05	0.00741189	2.13007
MGLL	5194.86	1982	-1.39013	1.2047e-08	5.69894e-06	5.24421
SEMA5A	771.38	296.77	-1.37811	0.000298192	0.0166532	1.7785
RNASE4	252.23	97.19	-1.37588	5.54419e-05	0.0048207	2.31689
FAM167B	215.6	84.09	-1.35827	1.33725e-06	0.000268854	3.57048
DEPP1	441.96	173.41	-1.34975	0.000676099	0.0296305	1.52826
SMURF2	2634.65	1034.89	-1.34813	4.02705e-06	0.000647711	3.18862
ETV4	164.99	66.17	-1.31809	3.62708e-05	0.00353564	2.45153
LOX	9826.3	3941.36	-1.31796	0.000227066	0.0141491	1.84927
PDCD1LG2	2316.55	932.77	-1.31238	0.00106411	0.0410641	1.38654
PNMA8A	125.44	51.23	-1.29198	0.00106516	0.0410641	1.38654
AKAP12	864.47	354.13	-1.28753	4.19348e-05	0.00394432	2.40403
ENC1	3179.83	1304.55	-1.2854	6.01926e-05	0.00512243	2.29052
SLC8A1	429.43	177.19	-1.27714	0.000127684	0.00933484	2.02989
CITED2	837.41	346.05	-1.27495	4.05792e-05	0.00388497	2.41061
CCDC106	250.97	104.62	-1.26229	1.21445e-05	0.00161432	2.79201
SEPTIN11	3402.41	1426.72	-1.25386	5.6436e-06	0.000872805	3.05908
PPDPF	796.72	334.15	-1.25358	0.000338491	0.0178545	1.74825
ZNF580	254.03	107.24	-1.24413	0.000172459	0.0117535	1.92983
GDNF	893.07	377.59	-1.24194	1.68653e-07	5.45531e-05	4.26318
ZNF469	391.34	167.11	-1.22765	2.32365e-07	6.3345e-05	4.19829
EHF	181.4	77.51	-1.22663	0.00135331	0.0489137	1.31057
CCDC8	210.36	90.27	-1.2205	0.000687665	0.0298124	1.5256
UCK2	1644.63	706.51	-1.21898	8.06244e-10	5.6381e-07	6.24887
MFAP3L	257.64	110.68	-1.21895	7.33407e-07	0.000166143	3.77952
RTN3	2628.38	1129.19	-1.21888	3.44892e-12	6.93406e-09	8.15901
TEAD1	1710.82	736.96	-1.21503	5.20414e-07	0.000126823	3.8968
HDHD5	531.44	229.83	-1.20935	2.509e-05	0.00274523	2.56142
LIMS2	397.3	171.86	-1.20897	8.31854e-06	0.00120536	2.91888
PRXL2B	327.66	143.53	-1.19088	2.11765e-05	0.00243288	2.61388
CPED1	1138.01	502.38	-1.17966	0.000665382	0.0293205	1.53283
CDC42EP3	320.01	141.34	-1.17901	2.11155e-05	0.00243288	2.61388
MUC1	1988.49	879.25	-1.17732	0.000680193	0.0296821	1.52751
PLXND1	1502.03	669.05	-1.16674	0.00134906	0.0488701	1.31096
ENPP1	152.47	68.14	-1.16196	0.000125063	0.00922712	2.03493
RECK	1077.46	481.77	-1.1612	0.000316035	0.017126	1.76634
ASAH1	1656.23	744.54	-1.15349	4.69792e-15	1.88903e-11	10.7238
XYLT1	2283.98	1027.81	-1.15197	0.000361438	0.0188746	1.72412
IGF1R	1562.96	704.66	-1.14928	3.54046e-06	0.000589325	3.22965
FBXO41	103.53	46.94	-1.14109	0.000316242	0.017126	1.76634
SLC25A23	270.86	122.9	-1.14006	1.97491e-07	5.77536e-05	4.23842
SORT1	347.87	158.41	-1.13484	0.00117865	0.044501	1.35163
CD9	631.5	288.06	-1.13241	1.69182e-05	0.00208215	2.68149
LRRC32	3038.49	1386.62	-1.13178	1.97428e-06	0.00035679	3.44759
PLPP1	2298.63	1054.56	-1.12413	1.14225e-05	0.00154387	2.81139
MYL9	6027.76	2770.02	-1.12173	6.70175e-10	5.1329e-07	6.28964
PFKFB3	8562.29	3936.05	-1.12125	0.000765964	0.0324204	1.48918
RASSF4	247.03	113.68	-1.11973	0.000186545	0.0123473	1.90843
ANG	63.3	29.24	-1.11398	0.00132317	0.0483679	1.31544
TMED7	3259.99	1506.41	-1.11376	7.25304e-10	5.30263e-07	6.27551
VGLL3	650.67	302.01	-1.10733	0.000480635	0.0235687	1.62766
CLDN4	1096.08	509.04	-1.10649	4.73358e-07	0.000117131	3.93133
LIF	9402.17	4377.81	-1.10279	1.65332e-09	1.00063e-06	5.99973
GATA6	211.17	98.39	-1.1018	8.18047e-05	0.00657698	2.18197
CASTOR2	450.06	210.74	-1.09463	3.62007e-05	0.00353564	2.45153
NEXN	315.43	148.41	-1.08774	0.00090049	0.036174	1.4416
MKNK1	365.55	175.22	-1.06091	9.28213e-07	0.000201748	3.69519
EPHA4	203.53	97.91	-1.05569	0.000799836	0.0334024	1.47622
GLUL	4416.53	2125.2	-1.05531	9.98523e-08	3.44815e-05	4.46241
ERRFI1	658.29	318.03	-1.04955	0.000482732	0.0235996	1.6271
CCL7	9132.11	4422.85	-1.04597	5.47691e-05	0.00481369	2.31752
EPN2	604.28	292.92	-1.04474	8.4026e-09	4.09538e-06	5.38771
GDF6	242.81	118.12	-1.03955	0.001357	0.0489373	1.31036
NID2	999.41	486.48	-1.0387	0.000232799	0.0143461	1.84326
NRBP2	628.76	312.79	-1.00731	9.80694e-05	0.00754712	2.12222
YIF1A	1207.29	602.73	-1.00219	0.000287185	0.016438	1.78415
PYROXD2	161.98	81.45	-0.991796	0.000235514	0.0144581	1.83989
PTEN	1463.21	735.78	-0.991793	4.23533e-05	0.00396053	2.40225
RASSF8	1959.73	985.65	-0.991503	4.16022e-05	0.00394432	2.40403
WTIP	226.86	114.2	-0.990296	7.34379e-05	0.00605731	2.21772
EXOSC1	251.21	126.97	-0.984425	9.98962e-06	0.00138511	2.85851
DCHS1	307.67	155.76	-0.982056	0.000794841	0.0332923	1.47766
SELENON	2534.63	1283.75	-0.981408	4.43057e-08	1.6967e-05	4.7704
POU2F2	1573	799.7	-0.975985	0.000292618	0.0165994	1.77991
FOXO3	1761.65	912.3	-0.949352	0.000377786	0.0194131	1.7119
EBAG9	298.98	154.94	-0.948351	5.12082e-05	0.00456585	2.34048
ADAM9	3379.68	1758.21	-0.94278	4.18403e-05	0.00394432	2.40403
ELK3	1912.39	998.06	-0.938172	2.8037e-09	1.50316e-06	5.823
IRX3	350.4	183.4	-0.934003	7.23698e-05	0.00599998	2.22185
IGFBP3	63968.1	33550.9	-0.931003	2.87111e-06	0.000496547	3.30404
DIPK1A	603.12	316.84	-0.928677	1.82618e-07	5.64724e-05	4.24816
DHRS3	1153.23	606.56	-0.926955	8.48308e-05	0.00675455	2.1704
IRS1	3545.73	1865.65	-0.926403	0.000309502	0.017048	1.76833
DPP4	11882.2	6253.65	-0.926038	0.000362762	0.0188824	1.72394
NSA2	726.55	382.8	-0.924462	3.82568e-07	9.61441e-05	4.01708
NIPAL3	869.81	458.65	-0.9233	8.92565e-07	0.000196658	3.70629
UQCRFS1	1092.5	585.32	-0.900342	2.56833e-05	0.00277242	2.55714
PLA2G15	895.43	479.94	-0.89973	2.82272e-07	7.56678e-05	4.12109
DNMT3A	262.12	142.31	-0.881202	0.000377689	0.0194131	1.7119
MARCKS	5199.16	2836.42	-0.874206	1.12808e-05	0.00153763	2.81315
CHST3	2570.94	1404.23	-0.872516	2.46626e-05	0.00271694	2.56592
LOC728392	319.43	174.58	-0.871658	0.000204454	0.0131013	1.88268
CNN3	3488.78	1906.94	-0.871466	0.000218333	0.0138254	1.85932
CLIP3	1408.05	785.12	-0.842703	5.82643e-07	0.000139869	3.85428
PHLDB2	704.85	393.06	-0.842564	0.00011949	0.00893894	2.04871
PPP4R4	205.1	114.61	-0.839516	0.000391356	0.0199195	1.70072
GALNT5	1060.63	592.89	-0.839081	6.66465e-07	0.000155354	3.80868
RARRES1	3176.01	1777.55	-0.837324	8.21918e-05	0.00657698	2.18197
RBPJ	5449.88	3053.76	-0.835639	1.4703e-05	0.00189187	2.72311
ANKRD13A	903.32	508.86	-0.827981	9.38597e-05	0.00732835	2.13499
CPD	2059.46	1163.73	-0.823515	1.0076e-07	3.44815e-05	4.46241
SLC43A3	8582.57	4871.64	-0.817003	0.00139383	0.0495981	1.30454
MYPN	176.27	100.11	-0.816166	0.000794659	0.0332923	1.47766
ZDHHC21	311.16	177.04	-0.813565	1.91225e-05	0.002245	2.64878
AOPEP	1736.64	988.28	-0.813309	2.3876e-05	0.00268065	2.57176
NPDC1	690.32	394.39	-0.80763	2.89111e-05	0.00298081	2.52567
HMOX1	23360.6	13362.5	-0.805887	0.00112156	0.0427469	1.3691
GANAB	11889.9	6801.23	-0.805873	2.32094e-05	0.00262887	2.58023
ABI3BP	13866	7934.01	-0.805426	0.000333447	0.0178545	1.74825
FKBP9	4991.76	2861.98	-0.802535	2.74943e-05	0.00288602	2.5397
PAQR7	496.86	284.92	-0.802292	0.000196667	0.0128065	1.89257
U2SURP	823.59	472.47	-0.801712	1.21366e-06	0.000250264	3.6016
PXYLP1	149.12	85.62	-0.800501	0.00117533	0.0444798	1.35184
NEDD4L	412.59	236.97	-0.800037	0.000273528	0.0159727	1.79662
TRMT112	839.92	482.9	-0.798541	1.82551e-05	0.00219116	2.65933
TTC28	430.27	248.22	-0.79362	0.00058443	0.0267266	1.57306
FARP1	817.24	471.95	-0.792108	0.000826486	0.0339979	1.46855
CLIP2	2067.38	1197.68	-0.787557	0.000890016	0.036058	1.443
GSTM2	159.71	92.68	-0.785052	0.000928728	0.0371584	1.42994
FHOD3	931.11	540.44	-0.784811	0.00129276	0.0477996	1.32058
HAGH	534.73	310.82	-0.782743	0.000971843	0.0383752	1.41595
RNPEPL1	636.82	371.76	-0.776523	0.000244742	0.0148726	1.82761
EIF4EBP2	1572.56	918.94	-0.775065	3.51016e-06	0.000589325	3.22965
LRP11	706.62	414.03	-0.77122	0.000251295	0.0150608	1.82215
BTN2A1	2737.59	1604.27	-0.770984	3.1462e-05	0.00320275	2.49448
SH2D4A	1231.07	723.92	-0.766019	0.000518714	0.0244382	1.61193
DAG1	2331.38	1375.86	-0.760849	5.68533e-05	0.00491628	2.30836
SLC6A8	883.55	522.08	-0.75905	0.000277054	0.0160871	1.79352
NTAN1	749.83	443.49	-0.757673	7.83966e-05	0.00638518	2.19483
KLHL42	933.35	552.95	-0.755276	7.98712e-07	0.000178423	3.74855
MYH9	16423.6	9734.9	-0.75453	0.000195865	0.0128065	1.89257
ZHX3	618.78	368.24	-0.748788	0.00103438	0.0402532	1.3952
CHD6	763.7	455.25	-0.74636	0.000164709	0.0113213	1.9461
ABHD5	1076.59	641.84	-0.746187	0.000449915	0.0224038	1.64968
VOPP1	2347.72	1400.78	-0.745031	3.55412e-06	0.000589325	3.22965
LAMA1	1336.69	797.69	-0.744761	0.000129278	0.00937798	2.02789
SLC25A4	256.75	153.42	-0.742897	0.000265887	0.0156749	1.80479
SMARCD1	990.23	591.95	-0.742302	2.79519e-05	0.00290051	2.53753
SLC35E3	309.06	185.44	-0.736961	4.2707e-05	0.00397052	2.40115
FAM180A	1195.22	717.9	-0.735419	8.57466e-06	0.00122049	2.91347
PRR14	277.11	166.47	-0.735193	0.000808962	0.0335344	1.47451
CYTH3	528.2	317.47	-0.734482	0.00130246	0.0480475	1.31833
PDPK1	1074	646.06	-0.733241	0.000558939	0.0258465	1.5876
SLC41A1	1872.8	1130.31	-0.728479	0.00065674	0.0290992	1.53612
IPO9	1196.46	722.43	-0.727837	0.00042617	0.0212873	1.67188
TPM1	14052.8	8492.37	-0.726614	0.000741296	0.031626	1.49996
FGFR1	8082.73	4900.97	-0.721776	0.000202786	0.0130464	1.88451
EXT1	5089.85	3086.39	-0.721701	0.000299814	0.0166858	1.77765
GNPDA1	688.52	418.49	-0.718299	0.00095881	0.037984	1.4204
SLC1A1	529.92	324.38	-0.708095	0.00134366	0.0487843	1.31172
GTF2A1	947.37	582.01	-0.702894	0.000142761	0.01016	1.99311
FAM222B	494.98	304.12	-0.702744	0.000294362	0.0166123	1.77957
ERP29	1622.11	997.6	-0.701338	0.000497689	0.023895	1.62169
CD99L2	1856.4	1142.08	-0.700842	4.36158e-06	0.000687761	3.16256
DLAT	777.09	478.53	-0.699463	0.000171456	0.0117349	1.93052
DNAJC16	562.73	346.74	-0.698575	1.48947e-06	0.000295762	3.52906
ADCY7	1026.04	632.46	-0.698042	2.67493e-05	0.00285247	2.54478
ST3GAL1	8024.87	4959.19	-0.694373	0.000315448	0.017126	1.76634
NFASC	1091.35	676.53	-0.689889	0.00138038	0.0494652	1.3057
LPGAT1	889.46	551.57	-0.689378	0.000494397	0.0238795	1.62197
KIAA1191	3648.41	2268.17	-0.685738	0.000732525	0.0313349	1.50397
DVL2	785.09	488.82	-0.683536	0.000284184	0.0163243	1.78716
AHNAK2	739.49	460.51	-0.683295	1.24899e-05	0.00164661	2.78341
GM2A	794.34	495.51	-0.680853	0.000547713	0.0255345	1.59287
FGF2	17213.8	10744.1	-0.680016	4.62392e-05	0.00424977	2.37163
TSPAN6	682.1	426.93	-0.675986	0.000369131	0.0190904	1.71919
ITGB3	3905.67	2448.93	-0.673421	0.000465393	0.023032	1.63767
GPR176	2846.14	1785.28	-0.672857	0.00097823	0.0383752	1.41595
HIPK1	780.46	489.82	-0.672082	0.000123181	0.00913018	2.03952
PSEN2	531.02	333.76	-0.669958	0.000159557	0.0110617	1.95618
DAB2	4091.91	2573.03	-0.669306	0.000338573	0.0178545	1.74825
IL12A	330.24	208.28	-0.664987	0.00126789	0.0470965	1.32701
CYB5R3	10991.6	6944.68	-0.662424	2.18998e-05	0.00249814	2.60238
FLOT1	967.25	612.77	-0.658551	0.000192881	0.0127143	1.89571
AGPAT3	2685.54	1705.31	-0.655177	1.11782e-05	0.00153667	2.81342
USP3	359.49	228.84	-0.651609	0.000224388	0.0140979	1.85085
GAREM2	587.36	375.14	-0.646807	4.81482e-05	0.00440009	2.35654
TMEM123	1769.32	1130.17	-0.646662	9.81186e-06	0.00138433	2.85876
ZNF358	696.35	444.94	-0.646199	0.000534742	0.0250023	1.60202
RAB35	1431.94	920.27	-0.63784	0.000153816	0.0107564	1.96833
C2CD2	425.16	273.48	-0.636547	0.000521157	0.0244382	1.61193
PPP3CA	1010.17	651.26	-0.633298	0.000783523	0.0330766	1.48048
MFSD10	1206.17	786.73	-0.616498	2.44649e-05	0.00271375	2.56643
TLCD5	324.7	212.66	-0.610571	0.000314467	0.017126	1.76634
ADM	9593.11	6285.57	-0.609954	0.000346294	0.0181426	1.7413
KIAA0232	440.2	288.92	-0.607485	0.00036558	0.0189677	1.72198
KXD1	1103.66	725.65	-0.604965	0.000214658	0.0136465	1.86498
WDR11	1188.31	782.45	-0.602828	2.67796e-05	0.00285247	2.54478
MAT2A	4462.13	2947.17	-0.598403	0.000521047	0.0244382	1.61193
SLC44A2	2046.45	1353.41	-0.596522	0.00138087	0.0494652	1.3057
ATP6V0C	2867.36	1899.39	-0.594188	0.000158434	0.0110314	1.95737
DNAJB6	2075.35	1380.99	-0.587651	2.71208e-05	0.00286981	2.54215
CDS2	931.56	619.97	-0.587457	8.02208e-05	0.00648378	2.18817
PURA	488.06	326.62	-0.57946	0.00107974	0.041349	1.38354
EVC	1183.6	793.53	-0.576823	0.000976535	0.0383752	1.41595
FXYD5	1892.36	1271.37	-0.573807	0.000647157	0.0288334	1.5401
TLE5	5525.35	3725.74	-0.568537	0.000425215	0.0212873	1.67188
CRKL	1799.04	1213.69	-0.567822	0.000639559	0.0285741	1.54403
DENND10	979.61	661.17	-0.567185	0.00133825	0.0486979	1.31249
MAX	2295.66	1550.91	-0.565796	0.000559225	0.0258465	1.5876
PRNP	1518.31	1026.54	-0.564683	0.000514644	0.0244175	1.6123
TRIM8	1805.53	1227.52	-0.55667	0.000649	0.0288357	1.54007
ARPC5	2837.4	1931.78	-0.554642	0.00112856	0.0429121	1.36742
GNAI2	5697.16	3922.48	-0.538477	0.000141927	0.0101455	1.99372
ARHGEF17	1339.11	923.33	-0.536357	0.00120842	0.0454117	1.34283
TBC1D20	1705.53	1204.5	-0.501782	0.00118521	0.0446439	1.35024
AP3S1	2160.57	1537.58	-0.490751	0.00116392	0.044152	1.35505
SEC61A1	12645.6	9050.61	-0.482546	0.000328966	0.017696	1.75213
CKAP4	11892.1	8531.49	-0.479133	0.000478466	0.0235341	1.6283
KLHL24	592.92	427.3	-0.472576	0.000976085	0.0383752	1.41595
RYBP	1296.86	947.48	-0.452853	0.000819952	0.0339026	1.46977
GOLM2	1879.43	1374.33	-0.451562	0.000318834	0.0172085	1.76426
CAPNS1	5721.79	4216.93	-0.440273	0.000663942	0.0293205	1.53283
S100A6	9862.12	7284.53	-0.437063	0.00062592	0.0281209	1.55097
SBDS	1822.75	1353.68	-0.429235	0.000803123	0.0334024	1.47622
DRAM1	13918	10592.8	-0.393859	0.000889137	0.036058	1.443
VCAM1	2913.51	3814.88	0.388878	0.000618379	0.02786	1.55502
H3-3B	6238.23	8417.49	0.432255	0.000225427	0.0141081	1.85053
RPL37	2723.21	3675.88	0.43278	0.000266057	0.0156749	1.80479
STAT3	3791.3	5157.14	0.443877	0.000489157	0.0237692	1.62399
WWP2	681.65	938.51	0.46133	0.000719044	0.0308403	1.51088
RELA	4454.64	6142.77	0.46358	0.000274089	0.0159727	1.79662
NBPF14	2031.41	2819.56	0.47299	0.000682846	0.0296835	1.52748
SLC16A1	2223.62	3087.82	0.473674	0.000709612	0.0305171	1.51546
IER3IP1	896.54	1250.94	0.480569	0.000609634	0.0275431	1.55999
SELENOW	506.3	712.87	0.493645	0.00131546	0.0483317	1.31577
RAB7A	3823.18	5396.01	0.49712	0.000415965	0.020973	1.67834
RMDN3	1414.71	2002.63	0.501388	0.000748134	0.0318333	1.49712
FXR1	1066.69	1517.98	0.509008	0.000199737	0.0129019	1.88935
POLE3	514.44	733.41	0.51161	0.000484639	0.023621	1.6267
GTPBP2	1809.03	2591.98	0.518838	0.00123965	0.0464767	1.33276
SMARCA4	920.41	1320.4	0.520631	0.000588644	0.0268208	1.57153
CDK5RAP3	782.92	1123.37	0.520892	7.44973e-05	0.00611334	2.21372
MICALL1	1280.81	1840.67	0.523181	0.000790928	0.0332923	1.47766
SF3A2	383	550.97	0.52461	0.000493109	0.0238795	1.62197
HYOU1	3123.14	4493	0.524682	0.000101369	0.00769066	2.11404
RFTN1	1012.96	1457.4	0.524819	0.0012874	0.047711	1.32138
CBR1	934.17	1344.47	0.525289	0.000178849	0.0120761	1.91807
SYPL1	1487.09	2141.47	0.526112	0.000160287	0.0110646	1.95606
PCMTD1	832.95	1201.35	0.528354	0.000336544	0.0178545	1.74825
SELENOK	513.81	742.23	0.530646	0.0010672	0.0410641	1.38654
PNPT1	580.37	838.46	0.53076	0.0008037	0.0334024	1.47622
MED24	758.05	1097.3	0.533602	0.000149916	0.0105294	1.97759
CDC42EP1	720	1052.38	0.547584	0.000550898	0.0256088	1.59161
TBC1D16	1346.01	1971.96	0.550939	5.75563e-05	0.00495046	2.30535
NUDC	833.47	1221.61	0.551576	0.0013353	0.0486979	1.31249
PARP10	2117.34	3117.12	0.557962	4.32811e-05	0.00400077	2.39786
PSMA1	1594.64	2358.26	0.564494	0.000503313	0.0240931	1.61811
NECAP2	1636.71	2422.95	0.565962	9.63326e-05	0.0074491	2.1279
ZBTB7A	648.26	960.04	0.566526	0.000901875	0.036174	1.4416
ST13	1577.68	2344.38	0.571398	0.000680967	0.0296821	1.52751
BLZF1	819.62	1221.61	0.575763	9.90836e-05	0.00758886	2.11982
PIM3	994.28	1485.43	0.579157	4.92687e-05	0.0044519	2.35145
NFKB2	3118.74	4674.12	0.583733	2.54131e-05	0.00276178	2.55881
AFDN	370.77	555.93	0.584375	0.000584915	0.0267266	1.57306
ZNF335	301.19	453.22	0.589514	0.00067326	0.0295866	1.5289
MAN2B1	1504.57	2280.48	0.599986	0.000245966	0.0148726	1.82761
RNF168	453.15	687.31	0.600984	0.000822915	0.0339379	1.46932
ATP6V1D	654.83	997.76	0.607578	0.000944442	0.0376	1.42481
RHBDF1	857.4	1309.17	0.610605	0.000901823	0.036174	1.4416
STK40	588.65	908.5	0.626079	4.04229e-05	0.00388497	2.41061
HLA-F	3542.92	5492.96	0.632645	3.11149e-05	0.00318759	2.49654
TRIM5	799.34	1239.5	0.632873	1.21252e-06	0.000250264	3.6016
B3GALT6	485.87	754.79	0.635508	0.000345524	0.0181426	1.7413
METTL4	231.5	359.7	0.635791	0.00124476	0.04656	1.33199
LURAP1L	617.27	959.23	0.635989	4.89291e-05	0.00444619	2.35201
CXCL11	17380.3	27066.2	0.639035	1.90916e-05	0.002245	2.64878
MAPRE3	389.02	608.82	0.646173	8.51617e-06	0.00122049	2.91347
ZBTB5	212.76	333.18	0.64706	0.00101943	0.0397975	1.40014
DCP2	286.94	450.07	0.649407	0.000594061	0.0269912	1.56878
C17orf49	772.59	1212.66	0.650396	1.46835e-05	0.00189187	2.72311
STAT5A	810.79	1274.34	0.652346	0.00049684	0.023895	1.62169
COQ8B	313.33	492.73	0.653121	0.000295486	0.0166175	1.77943
RAP2B	276.42	435.51	0.655861	0.00106289	0.0410641	1.38654
COLGALT1	2602.85	4134.77	0.667717	2.24043e-07	6.21293e-05	4.2067
TCEAL8	646.62	1029	0.670253	0.000456224	0.0226479	1.64497
ELOVL7	566.94	905.02	0.674752	5.97008e-06	0.000905875	3.04293
GZF1	295.24	472.23	0.677612	0.000254126	0.0151384	1.81992
MED6	312.77	500.71	0.67887	0.00018634	0.0123473	1.90843
KHNYN	1099.74	1761.02	0.679242	3.68289e-05	0.00356841	2.44753
MRPL45	254.11	407.06	0.679772	0.000337831	0.0178545	1.74825
STEAP3	2212.26	3545.5	0.68047	1.53762e-05	0.00196278	2.70713
SART3	480.22	771.34	0.683681	0.000511876	0.024358	1.61336
SH3KBP1	1158.7	1869.5	0.690148	0.000229198	0.0141786	1.84837
SLC9B2	1165.18	1883.89	0.693164	3.32608e-05	0.00334354	2.47579
HAPLN3	6921.8	11206.4	0.695102	1.65924e-05	0.00206878	2.68429
AGTR1	112.48	182.37	0.697233	0.000850927	0.0347368	1.45921
CPT1A	855.41	1396.87	0.707507	0.000148368	0.0104665	1.9802
MTG1	422.11	698.67	0.726997	0.00138455	0.049487	1.30551
MANF	817.13	1364.99	0.740254	5.9592e-05	0.00509829	2.29258
PPM1K	219.57	367.32	0.742377	0.000600564	0.0272098	1.56527
ZFYVE16	699.11	1171.8	0.745129	0.00103611	0.0402532	1.3952
PLGRKT	553.81	928.49	0.745498	0.000174198	0.011822	1.92731
STX1A	203.52	341.61	0.747216	0.000179445	0.0120761	1.91807
SMIM20	189.11	318.06	0.750088	0.0013761	0.0494652	1.3057
COL8A2	729.14	1231.15	0.755737	0.000864294	0.0351932	1.45354
ARHGEF2	1403.71	2428.52	0.790835	0.0001004	0.00765326	2.11615
AARS2	152.32	263.81	0.792451	9.32892e-05	0.00731933	2.13553
RAB27A	251.8	437.65	0.797531	0.000116663	0.00876827	2.05709
NAGPA	142.79	248.6	0.799993	0.000517063	0.0244382	1.61193
DPH2	232.93	408.36	0.809952	0.000410906	0.0207831	1.68229
CCL5	17184.9	30624.4	0.833539	6.40537e-07	0.000151506	3.81957
SSTR2	476.79	850.4	0.83479	1.97575e-05	0.00230275	2.63775
SLC31A2	1969.02	3513.82	0.835562	1.23184e-09	7.92518e-07	6.10099
CHKB	329.92	588.83	0.835725	4.86054e-06	0.000758999	3.11976
PRUNE1	166.8	299.63	0.845077	1.58415e-05	0.00199058	2.70102
ZNF586	83.73	151.43	0.85491	0.000227843	0.0141491	1.84927
TPMT	322.91	584.64	0.856391	0.00139044	0.0495871	1.30463
UBE2D1	438.16	794.81	0.859136	1.28485e-07	4.30533e-05	4.36599
NXPH4	282.69	516.71	0.870128	0.000896837	0.036174	1.4416
GEM	567.99	1043.04	0.876863	0.000993859	0.0388935	1.41012
TMEM54	337.49	624.26	0.887313	1.60039e-06	0.000305173	3.51545
INTS14	285.61	531.85	0.896979	0.000382681	0.0196019	1.7077
SDF2L1	103	192.11	0.899288	0.000122303	0.00910701	2.04062
ZNF697	358.8	671.67	0.904556	0.000110499	0.008344	2.07863
MXD1	252.91	473.75	0.905506	3.37198e-05	0.00336863	2.47255
NOTCH3	441.96	829.53	0.908392	1.24065e-08	5.70133e-06	5.24402
BTBD11	428.66	807.73	0.914054	0.000257705	0.0152949	1.81545
TOMM40L	433.55	820.24	0.919849	1.79917e-07	5.64724e-05	4.24816
CLSPN	126.64	239.64	0.920171	2.39998e-05	0.00268065	2.57176
SQOR	3976.89	7545.32	0.923942	1.61917e-08	6.85336e-06	5.1641
GXYLT2	143.65	275.52	0.939567	0.000630863	0.0282641	1.54877
SLC45A3	49.81	96.12	0.948362	0.00131617	0.0483317	1.31577
STK3	121	233.76	0.949979	0.000383898	0.0196019	1.7077
GLI3	211.66	409.92	0.953632	0.000301197	0.016705	1.77715
PLEKHG4	93.63	182.68	0.964355	0.00125986	0.0469063	1.32877
RUNX2	727.16	1425.58	0.971209	0.000139475	0.0100148	1.99936
CXCL10	42609.3	83859.7	0.976809	1.68228e-11	2.25482e-08	7.64689
SMC4	200.19	402.22	1.00662	6.6758e-05	0.00560205	2.25165
WNT5A	8676.63	17449.5	1.00798	0.000143493	0.0101671	1.9928
AGRN	5166.85	10537.4	1.02816	3.1574e-12	6.93406e-09	8.15901
MPRIP	948.43	1942.01	1.03394	6.45764e-10	5.1329e-07	6.28964
UAP1L1	575.92	1180.53	1.0355	1.18045e-05	0.0015822	2.80074
KIAA0408	76.44	157.85	1.0462	6.19382e-05	0.00524323	2.2804
RNF144B	449.42	941.79	1.06733	1.42743e-14	4.59177e-11	10.338
PCLO	96.6	202.7	1.06927	0.000284005	0.0163243	1.78716
DRAXIN	2180.79	4580.68	1.07071	1.19945e-06	0.000250264	3.6016
SNX10	149.74	318.05	1.08683	0.000126234	0.00927103	2.03287
MAD2L2	358.37	780.15	1.12229	7.14685e-06	0.00106435	2.97292
SNAI1	531.14	1159.03	1.12576	1.63174e-06	0.000305173	3.51545
PCYOX1L	48.24	106.45	1.14177	0.000849952	0.0347368	1.45921
BCL2A1	60.15	133.24	1.14736	0.000334589	0.0178545	1.74825
TGFB3	89.63	201.56	1.16917	3.61903e-05	0.00353564	2.45153
EIF5A2	46.8	105.57	1.17369	0.000699405	0.0301588	1.52059
WDR18	193.41	438.55	1.18109	1.6211e-06	0.000305173	3.51545
IRF4	73.98	168.16	1.18465	9.22905e-05	0.00728534	2.13755
HDAC1	807.45	1838.94	1.18743	9.78331e-12	1.4305e-08	7.84451
JDP2	255.05	581.92	1.19006	0.000212239	0.0135462	1.86818
CYRIB	167.1	383.24	1.19752	2.03331e-07	5.83995e-05	4.23359
TNIP3	116.54	268.75	1.20539	6.69802e-05	0.00560205	2.25165
TSPAN15	52.23	121.34	1.21614	6.91525e-06	0.00103948	2.98318
CTSC	929.54	2221.81	1.25714	0.000182517	0.0122317	1.91251
FGF13	59.14	141.64	1.25999	3.28982e-06	0.000562909	3.24956
TNFRSF19	270.35	653.23	1.27276	0.000134957	0.00973387	2.01171
STAP2	105.01	257.8	1.29568	5.54482e-05	0.0048207	2.31689
SLC35F2	87.26	218.53	1.32442	0.000425439	0.0212873	1.67188
MLLT11	541.38	1388.81	1.35914	0.00012944	0.00937798	2.02789
PTGER4	30.7	83.68	1.44665	0.00110832	0.0423427	1.37322
P2RY6	130.04	356.98	1.4569	1.81349e-06	0.000335012	3.47494
H2BC12	863.65	2379.42	1.46208	1.93981e-07	5.77536e-05	4.23842
FIGN	32.2	94.28	1.54985	5.11605e-05	0.00456585	2.34048
GPAT3	64.86	193.04	1.57351	0.000238484	0.0145847	1.8361
ADGRG1	199.85	598.35	1.58204	0.00124795	0.046571	1.33188
LMLN	89.91	275.54	1.61573	2.76328e-05	0.00288602	2.5397
GINS3	69.12	217	1.65046	2.2118e-07	6.21293e-05	4.2067
GPR84	217.65	698.66	1.68259	0.000474934	0.023432	1.63019
PLEK2	148.31	476.66	1.68434	1.30988e-06	0.000266684	3.574
TYRO3	101.8	382.44	1.90948	5.33061e-08	1.96739e-05	4.70611
DRD4	59.03	321.43	2.44498	5.38206e-08	1.96739e-05	4.70611
KLRD1	54.04	302.87	2.4865	1.69588e-07	5.45531e-05	4.26318
RASL12	6.6	41.33	2.64662	0.00031523	0.017126	1.76634
NEURL3	23.8	156.17	2.71417	2.25979e-06	0.000403849	3.39378
NYAP2	6.25	44.18	2.82168	1.34036e-05	0.00175271	2.75629
KMO	3.12	28.69	3.19885	3.31842e-05	0.00334354	2.47579
U2AF1L5	6.56	91.71	3.80458	9.66863e-12	1.4305e-08	7.84451
ITGA11	4140.04	2713.48	-0.609504	0.00142623	0.0504996	1.29671
PRXL2C	190.7	103.99	-0.874883	0.00142711	0.0504996	1.29671
CILK1	220.5	126.54	-0.801143	0.00142858	0.0504996	1.29671
EIF2B5	400.56	610.22	0.607298	0.00144009	0.0507947	1.29418
CES4A	83.59	37.89	-1.14159	0.00146061	0.0514057	1.28899
KLF11	391.62	244.72	-0.67836	0.00146429	0.0514143	1.28892
RASD2	51.6	15.63	-1.72323	0.00146724	0.0514143	1.28892
CHST11	1611.01	1140.32	-0.498519	0.00147892	0.0517108	1.28642
PDLIM2	409.71	248.47	-0.721486	0.00150216	0.0524047	1.28063
CX3CL1	196.24	625.53	1.67244	0.00150528	0.0524047	1.28063
RAI14	3995.01	2408.25	-0.730216	0.00151824	0.0526697	1.27844
PANX2	162.35	294.43	0.858815	0.00151944	0.0526697	1.27844
PPP1R14C	503.4	292.62	-0.782669	0.00152418	0.0527204	1.27802
UBTF	879.42	1240.85	0.4967	0.00154117	0.0531936	1.27414
NGFR	5.89	24.91	2.08006	0.00157889	0.0543788	1.26457
SIDT2	1167.5	1560.71	0.418776	0.0015886	0.0545963	1.26284
MPHOSPH10	361.49	526.49	0.542458	0.00159372	0.0546555	1.26237
NUP62	1583.8	2120.22	0.420821	0.00160327	0.0548661	1.2607
ESM1	1084.39	618.22	-0.810696	0.0016143	0.0550453	1.25928
TGOLN2	3968.35	2696	-0.557716	0.00161535	0.0550453	1.25928
LAMA3	302.73	163.3	-0.890495	0.00164071	0.0557912	1.25343
INPP4B	81.8	42.54	-0.943259	0.00165056	0.055889	1.25267
PIK3C2A	558.52	345.79	-0.691706	0.00165085	0.055889	1.25267
ATP5IF1	588.74	392.57	-0.584671	0.00165401	0.055889	1.25267
ERO1A	6045.91	4175.99	-0.533842	0.00166156	0.0559111	1.2525
DIPK2A	326.19	170.01	-0.940067	0.00166162	0.0559111	1.2525
CMTM4	194.16	114.57	-0.76104	0.00168965	0.0566987	1.24643
DCAF12	879.45	622.1	-0.499448	0.00169208	0.0566987	1.24643
VLDLR	408.02	170.28	-1.2607	0.00169692	0.0567427	1.24609
HBEGF	497.01	322.69	-0.623133	0.0017177	0.0573185	1.24171
RGP1	1016.63	718.17	-0.501398	0.00172652	0.0574936	1.24038
ATF2	606.2	384.13	-0.658195	0.00174915	0.0580097	1.2365
ZNF680	119.84	189.02	0.657449	0.00174924	0.0580097	1.2365
ZFP36	797.78	498.54	-0.678267	0.0018267	0.060454	1.21857
SPSB4	65.22	17.96	-1.86028	0.00183838	0.0607157	1.2167
RBBP7	1337.54	1812.2	0.438163	0.0018461	0.0608457	1.21577
PON2	1475.46	2032.34	0.461978	0.00185335	0.060895	1.21542
MCM6	164.5	301.37	0.87339	0.00185517	0.060895	1.21542
MSANTD3	1109.28	1541.54	0.474751	0.00189833	0.0620772	1.20707
NEMP1	642.16	1296.04	1.0131	0.00190034	0.0620772	1.20707
RFX7	279.23	173.27	-0.688482	0.00190276	0.0620772	1.20707
FAM124A	411.79	254.92	-0.691844	0.00192489	0.062672	1.20293
RGS3	1632.17	1056.76	-0.627143	0.00194314	0.0631383	1.19971
VARS1	856.59	1358	0.664809	0.00196848	0.0638006	1.19517
FBXO3	219.58	320.57	0.545903	0.00197357	0.0638006	1.19517
RUSC2	2756.47	1859.19	-0.568146	0.00197542	0.0638006	1.19517
RPS6KA2	1992.44	1110.67	-0.843104	0.00198955	0.064128	1.19295
NAPA	2954.85	3754.41	0.345503	0.00199387	0.0641387	1.19288
BDKRB2	3203.19	1978.23	-0.695303	0.00200801	0.0643394	1.19152
CFAP251	249.16	138.6	-0.846148	0.00200811	0.0643394	1.19152
DUSP14	400.38	231.51	-0.790314	0.00201517	0.0644374	1.19086
MLX	641.62	946.72	0.561214	0.00202913	0.0647551	1.18873
GBP1	72878.4	48249	-0.59499	0.00204507	0.065111	1.18635
LSM7	118.62	195.17	0.718458	0.0020515	0.065111	1.18635
MT1X	1799.45	3792.08	1.07544	0.00205243	0.065111	1.18635
INTS11	601.91	838.98	0.479087	0.0020711	0.0654436	1.18413
PDLIM7	3102.92	4081.87	0.395602	0.0020718	0.0654436	1.18413
TUBGCP3	164.05	260.33	0.666176	0.00207512	0.0654436	1.18413
COL12A1	1265.25	700.06	-0.853878	0.0020847	0.0656172	1.18298
N4BP1	1388.03	1801.67	0.376297	0.00209269	0.0657102	1.18237
PCSK7	1033.64	1468.79	0.506888	0.00209583	0.0657102	1.18237
AKT3	1742.41	1211.69	-0.524058	0.00215203	0.0672526	1.17229
ANK2	448.66	753.86	0.748678	0.00215539	0.0672526	1.17229
SH3PXD2A	5277.89	2607.83	-1.01711	0.00215757	0.0672526	1.17229
MRGPRF	446.45	162.03	-1.46222	0.00219791	0.0683775	1.16509
DCBLD1	4098.26	6490.82	0.663391	0.00221224	0.0686906	1.1631
G3BP2	2425.96	3416.18	0.493827	0.00221769	0.0687271	1.16287
PRMT1	1396.88	1937.11	0.471696	0.00224641	0.0694686	1.15821
LGI2	529.69	1002.57	0.920478	0.00225026	0.0694686	1.15821
NME4	546.88	343.73	-0.669956	0.00226034	0.0695379	1.15778
TGFBR2	4868.16	2506.37	-0.957778	0.00226115	0.0695379	1.15778
USP13	266.15	398.98	0.584064	0.0022865	0.0701348	1.15407
PRDX1	4475.89	7000.29	0.64524	0.0022908	0.0701348	1.15407
TRAM2	2825.73	1953.93	-0.532242	0.00229566	0.0701348	1.15407
CLOCK	547.4	382.29	-0.517909	0.00230234	0.0701348	1.15407
DAB2IP	908.23	1273.86	0.488078	0.00230236	0.0701348	1.15407
FAM13A	399.38	241.56	-0.725376	0.00231657	0.0704344	1.15222
PAQR3	343.13	569.17	0.7301	0.00233253	0.0707857	1.15005
ZNF746	402.73	562.38	0.481754	0.00233714	0.0707919	1.15002
BMT2	840.73	513.26	-0.711948	0.00234505	0.070898	1.14937
USP18	1917.18	2759.21	0.52527	0.00234993	0.0709123	1.14928
SOD2	119977	92836.8	-0.369984	0.00242621	0.0730167	1.13658
PDCD10	1169.86	856.99	-0.448982	0.00242967	0.0730167	1.13658
DENND2A	39.93	7.57	-2.40012	0.00243328	0.0730167	1.13658
RNF185	1007.81	771.1	-0.386231	0.00246589	0.0737267	1.13237
SFRP1	1738.18	841.52	-1.0465	0.00246611	0.0737267	1.13237
ZPLD1	57.22	12.27	-2.22142	0.0024713	0.0737448	1.13227
OAS2	6665.19	8902.45	0.417556	0.00248363	0.0738987	1.13136
ZDHHC16	1110.55	837.55	-0.40702	0.00248565	0.0738987	1.13136
SPIN3	127.84	73.8	-0.792715	0.00252826	0.0750267	1.12478
MAMLD1	332.42	203.96	-0.704751	0.00254163	0.0752847	1.12329
GRAMD1A	2097.2	3606.98	0.782331	0.00255696	0.0755996	1.12148
RNF152	302.91	161.45	-0.907825	0.00257092	0.0756555	1.12116
WWC1	138.79	66.09	-1.07026	0.00257205	0.0756555	1.12116
CCDC80	11739	7756.18	-0.59789	0.00257296	0.0756555	1.12116
PPFIBP1	1611.71	1010.94	-0.672889	0.00260483	0.0764526	1.11661
SNAPC1	742.67	508.95	-0.545192	0.00261064	0.0764835	1.11643
PRPF3	760.15	1036.42	0.447261	0.00263764	0.0771341	1.11275
CSE1L	716.2	1036.75	0.533636	0.00264646	0.0771815	1.11249
B9D1	149.27	75.88	-0.976187	0.00264886	0.0771815	1.11249
RBM15B	1186.66	1541.74	0.377647	0.00266659	0.0775577	1.11038
ARL4D	422.32	302.31	-0.482305	0.00270643	0.0785743	1.10472
DBNDD1	18.77	2.19	-3.10122	0.00272308	0.07884	1.10325
RARA	670.61	481.35	-0.478396	0.00272538	0.07884	1.10325
RTL8A	761.26	545.32	-0.481278	0.00273413	0.0788645	1.10312
EML1	1194.91	684.64	-0.803485	0.00273604	0.0788645	1.10312
TBC1D2	497.07	289.86	-0.778085	0.00274673	0.0790312	1.1022
TPM2	2878.55	1881.65	-0.613343	0.0027752	0.0797077	1.0985
ARIH1	1533.56	1165.17	-0.39634	0.00281411	0.0804881	1.09427
LEF1	33.21	155.4	2.2264	0.00281812	0.0804881	1.09427
HAGHL	30.45	69.29	1.18619	0.00281925	0.0804881	1.09427
SCX	31.89	70.53	1.1454	0.00282239	0.0804881	1.09427
ASAP2	826.17	600.79	-0.459569	0.00284372	0.0809528	1.09177
FEN1	192.34	360.45	0.906104	0.00286911	0.081507	1.08881
NTN1	3444.42	2130.17	-0.693289	0.00288061	0.081507	1.08881
SLC28A3	21.46	3.41	-2.65282	0.00288278	0.081507	1.08881
CDH2	2332	1330.35	-0.809762	0.00288593	0.081507	1.08881
ADCK2	159.69	90.7	-0.816081	0.00288852	0.081507	1.08881
TSPAN17	921.18	660.36	-0.480227	0.00289865	0.0815603	1.08852
MGAT5	464.83	276.91	-0.747254	0.00290225	0.0815603	1.08852
BICC1	1645.26	1185.71	-0.472568	0.00291058	0.0815603	1.08852
MOSPD1	260.4	154.33	-0.754712	0.00291069	0.0815603	1.08852
RHBDD2	1682.06	1083.82	-0.634104	0.00292574	0.0818394	1.08704
NECAP1	914.86	617.6	-0.566875	0.00294574	0.0822556	1.08483
GNAL	13.41	42.45	1.6621	0.0029781	0.0829646	1.08111
ALPK1	494.64	689.8	0.479799	0.00298504	0.0829646	1.08111
GPANK1	493.65	745.98	0.595639	0.0029866	0.0829646	1.08111
SGK1	1599.24	983.91	-0.700786	0.00300789	0.083347	1.07911
ASF1A	611.11	890.09	0.542532	0.00301418	0.083347	1.07911
CARM1	1058.91	771.44	-0.456951	0.00301591	0.083347	1.07911
MT1G	1228.62	2436.65	0.987863	0.00302838	0.0835479	1.07806
BACE1	1680.37	1151.41	-0.545378	0.00303674	0.0836353	1.07761
NIPAL4	10.39	0.64	-4.02643	0.00304453	0.0837063	1.07724
EVI2A	31.83	86.93	1.44971	0.00305816	0.0839378	1.07604
MBD6	478.35	648.72	0.439531	0.00308784	0.0846078	1.07259
TVP23C-CDRT4	256.81	161.51	-0.669091	0.0031228	0.0854202	1.06844
TRIM14	657.79	988.11	0.587034	0.00313136	0.0855089	1.06799
GFUS	326.72	546.07	0.74103	0.00314681	0.0856642	1.0672
ELL2	4444.75	3128.79	-0.506496	0.0031477	0.0856642	1.0672
FAM43A	144.98	363.55	1.32632	0.00316423	0.0859687	1.06566
ARHGEF37	46.23	16.24	-1.50904	0.00317306	0.0860633	1.06518
CABIN1	718.62	513.55	-0.484735	0.003213	0.0869999	1.06048
KRR1	445.95	626.94	0.491459	0.00321966	0.0870338	1.06031
VILL	83.34	159.15	0.933275	0.00323781	0.0872908	1.05903
SMARCA5	1613.06	2202.78	0.449527	0.00324003	0.0872908	1.05903
RPS29	717.08	1118.89	0.641858	0.00327161	0.0877837	1.05659
RDH10	138.24	65.4	-1.07977	0.0032727	0.0877837	1.05659
CEACAM1	38.79	88.37	1.18771	0.0032747	0.0877837	1.05659
NFKB1	1512.42	2049.14	0.438162	0.00333537	0.0892614	1.04934
VPS37A	1074.1	775.79	-0.469383	0.00334359	0.0892784	1.04925
GFPT2	10017.2	6048.86	-0.727741	0.00335986	0.0892784	1.04925
FDXACB1	19.68	51.72	1.39414	0.00336165	0.0892784	1.04925
COX15	310.46	477	0.619562	0.00336271	0.0892784	1.04925
SPRN	27.44	6.76	-2.02214	0.00336376	0.0892784	1.04925
KCNE4	568.55	1187.33	1.06235	0.00340981	0.0903514	1.04406
TMOD2	142.16	66.97	-1.08589	0.00342473	0.0905976	1.04288
HTATIP2	996.19	1469.11	0.560447	0.00346673	0.0915534	1.03833
COL5A3	251.94	723.75	1.52239	0.00347224	0.0915534	1.03833
RBMS2	2179.35	1508.53	-0.530752	0.00348008	0.0916099	1.03806
TYMP	8296.55	13914.9	0.746044	0.00349048	0.0916248	1.03799
SYT7	211.45	83.13	-1.34689	0.00349204	0.0916248	1.03799
KRTAP1-5	24.58	3.41	-2.85117	0.00350186	0.0916731	1.03776
TMSB4X	13793.4	10433.1	-0.40282	0.00350528	0.0916731	1.03776
LACC1	1233.44	1888.82	0.6148	0.00352589	0.0919843	1.03629
FJX1	145.64	256.06	0.814072	0.00352862	0.0919843	1.03629
FADS1	1728.86	861.14	-1.00551	0.0035501	0.0923944	1.03435
PTPN18	448.17	277.28	-0.692687	0.00358929	0.0932635	1.03029
RAC2	169.05	311.77	0.883057	0.00367352	0.0952982	1.02092
ARL10	637.77	328.17	-0.958587	0.00369241	0.0956341	1.01939
ADIRF	133.45	63.82	-1.06416	0.00372369	0.0962669	1.01652
GSE1	317.66	435.77	0.456091	0.00372882	0.0962669	1.01652
RNF208	72.15	28.23	-1.35382	0.00378407	0.0972516	1.0121
ARMC9	1241.79	863.49	-0.524168	0.00378489	0.0972516	1.0121
SLIT2	1497.01	805.77	-0.893644	0.0037851	0.0972516	1.0121
ARRDC4	847.83	600.78	-0.496947	0.00382553	0.0980617	1.0085
GCNT1	725.26	412.2	-0.815176	0.00383084	0.0980617	1.0085
COQ2	211.55	334.35	0.660402	0.00383664	0.0980617	1.0085
ABCC6	31.6	8	-1.98205	0.00384102	0.0980617	1.0085
ADCY3	1525.49	916.03	-0.735813	0.00386002	0.0983907	1.00705
KIFAP3	1429.03	2072.99	0.536681	0.00387905	0.0987193	1.0056
BBC3	258.73	399.06	0.625193	0.00391246	0.0993758	1.00272
RNASEH2A	63.13	118.92	0.913575	0.0039172	0.0993758	1.00272
PEX12	151.51	229.58	0.599553	0.00392631	0.0994501	1.00239
DNAJB2	1448.89	1035.54	-0.484566	0.00393495	0.0995122	1.00212
PEG10	85.04	24.36	-1.80382	0.00398836	0.100704	0.996951
ATG9B	21.59	4.55	-2.24538	0.00400524	0.100755	0.996734
MAGED4	537.88	289.4	-0.894212	0.00401365	0.100755	0.996734
SCN8A	289.6	119.87	-1.27264	0.00401985	0.100755	0.996734
PLOD2	24535.4	16225	-0.596644	0.00402127	0.100755	0.996734
FGL2	364.28	150.24	-1.27781	0.00402944	0.100755	0.996734
RNF220	926.32	636.36	-0.541664	0.00403391	0.100755	0.996734
CCL13	200.87	96.91	-1.05156	0.0040342	0.100755	0.996734
TGFB2	489.98	294.33	-0.735296	0.00405175	0.101036	0.995523
NAA20	1308.99	1720.01	0.393955	0.00406398	0.101184	0.994886
CTSZ	4394.08	2996.97	-0.552057	0.00413161	0.102709	0.988391
SEMA3E	83.38	26.25	-1.66748	0.00417138	0.103538	0.984902
KLF13	2564.69	1761.77	-0.541762	0.00418304	0.103667	0.984358
GAS6	7136.66	4748.95	-0.587641	0.00419552	0.103817	0.983733
LAYN	651.75	377.75	-0.786893	0.00420229	0.103824	0.983701
BASP1	5922.84	4402.92	-0.427828	0.00422987	0.104345	0.981526
LIMD1	660.1	442.29	-0.577694	0.00425772	0.104872	0.979342
SLC1A3	286.27	133.75	-1.0978	0.00426832	0.104972	0.978927
MAZ	1412.24	1790.28	0.3422	0.00430131	0.105622	0.976246
YBX3	2438.62	1345.97	-0.857417	0.00435143	0.106646	0.972055
KCTD9	1187.14	859.22	-0.466388	0.00435628	0.106646	0.972055
THBS2	1580.33	956.22	-0.724816	0.00438252	0.107046	0.970431
MAML3	39.43	11.13	-1.82509	0.00439002	0.107046	0.970431
GRB7	22.04	63.33	1.52303	0.00439972	0.107046	0.970431
PBX3	276.78	408.57	0.561848	0.00440667	0.107046	0.970431
NRIP3	904.26	1400.91	0.631549	0.00440685	0.107046	0.970431
RAB3IP	101.53	54.71	-0.892006	0.00441254	0.107046	0.970431
CACNB2	4.49	19.23	2.09785	0.00442177	0.107108	0.970178
HIF1A	25896.7	16991.9	-0.607924	0.00443745	0.107199	0.969808
PCDHGC3	1376.54	984.54	-0.483514	0.00443887	0.107199	0.969808
AMER1	189.16	125.48	-0.592148	0.00447922	0.107897	0.966989
CYP27B1	26.76	67.68	1.33874	0.00448787	0.107897	0.966989
FBN1	15846.6	8013.32	-0.983703	0.0044879	0.107897	0.966989
SLC2A11	64.26	31.31	-1.03734	0.00451308	0.108341	0.965208
PSD4	1110.34	742.05	-0.581416	0.00452485	0.108462	0.964724
SNTA1	390.04	191.39	-1.02712	0.00453339	0.108504	0.964552
PLPBP	282.51	186.37	-0.600086	0.00458057	0.109454	0.960766
STEAP4	40.7	9.37	-2.11839	0.00459096	0.109454	0.960766
CDIP1	922.79	670.64	-0.460463	0.0045935	0.109454	0.960766
JAZF1	195.44	305.63	0.645086	0.00460528	0.109573	0.960297
H2AW	43.31	19.17	-1.17549	0.00466471	0.110823	0.95537
FSTL1	49391.4	28844.9	-0.775945	0.00467763	0.110966	0.954809
MCU	487.23	333.44	-0.547197	0.00472132	0.111838	0.951412
LDOC1	271.18	191.95	-0.498502	0.00474039	0.112124	0.950301
KIAA0754	42.41	9.85	-2.1062	0.00475738	0.112213	0.949956
POLA2	149.13	243.37	0.706523	0.00475811	0.112213	0.949956
PFKP	5389.62	3797.69	-0.50506	0.00479686	0.11296	0.947076
IL1A	401.71	1098.63	1.45149	0.00480659	0.11296	0.947076
ALDH1A3	2456.18	1719.69	-0.51427	0.00481083	0.11296	0.947076
GIMAP2	140.16	238.26	0.765474	0.00482711	0.113177	0.946243
CUL4B	1451.35	1062.08	-0.450499	0.00485633	0.113696	0.944255
ARID5B	2911.63	1915.41	-0.604176	0.00487252	0.113838	0.943712
POLR2B	1131.38	1474.68	0.382324	0.00488268	0.113838	0.943712
FAM102A	688.52	469.85	-0.551296	0.00488703	0.113838	0.943712
DPF3	35.06	13.61	-1.36536	0.00489196	0.113838	0.943712
CAPN5	506.83	329.24	-0.622359	0.00489798	0.113838	0.943712
PLTP	2322.09	1136.44	-1.0309	0.00490487	0.113838	0.943712
NUP54	229.7	345.1	0.587267	0.00491774	0.113973	0.9432
TIMELESS	168.48	250.14	0.570167	0.00496097	0.114809	0.940024
OSGIN1	66.52	214.3	1.68776	0.00497591	0.114987	0.93935
SNRPE	229.45	347.26	0.597864	0.00498298	0.114987	0.93935
OTULIN	411.44	593.71	0.529084	0.00499635	0.115131	0.938809
ARHGAP27	249.4	403.58	0.694387	0.00500676	0.115206	0.938527
NUAK1	348.84	232.89	-0.582899	0.00503038	0.115352	0.937976
EMILIN1	5494.21	6717.1	0.289925	0.00503413	0.115352	0.937976
RARB	10.89	63.34	2.54016	0.00503463	0.115352	0.937976
ZNF267	743.55	1130.89	0.604964	0.00506513	0.115886	0.935971
NAA40	449.34	326.73	-0.459709	0.00507537	0.115955	0.935711
RNF150	116.14	61.21	-0.923991	0.00509111	0.116149	0.934983
PIGZ	69.72	34.51	-1.01452	0.0051221	0.116691	0.932963
MFAP5	626.46	429.46	-0.544693	0.00513872	0.116904	0.932171
SNX18	363.99	262.75	-0.470215	0.00516601	0.117359	0.930484
KDM5A	881.9	665.52	-0.406132	0.00518131	0.11754	0.929813
RNF40	1715.58	1254.32	-0.451784	0.00519787	0.11775	0.929039
PCDHGB7	366.22	200.04	-0.872415	0.00524785	0.118715	0.925494
GRB14	118.66	314.3	1.40535	0.00525648	0.118743	0.925391
OR1J4	12.28	0.97	-3.65452	0.00528998	0.11925	0.923542
FZD4	563.69	1006.46	0.836307	0.00529374	0.11925	0.923542
RPA2	534.85	707.64	0.403865	0.00532178	0.119386	0.923045
NXNL2	56	27.67	-1.01694	0.0053263	0.119386	0.923045
QSOX2	491.25	353.61	-0.474321	0.00532661	0.119386	0.923045
SMPD4	849.01	1114.67	0.392759	0.00532949	0.119386	0.923045
PRKAR1B	240.77	140	-0.782274	0.00535116	0.119705	0.921887
MCUB	739.78	1020.72	0.464409	0.00537014	0.119963	0.920953
CYP27A1	321.88	537.56	0.739914	0.00541397	0.120709	0.918261
CADPS2	195.99	302.18	0.624654	0.00541854	0.120709	0.918261
EGR3	28.94	7.35	-1.97813	0.00543449	0.120764	0.918063
PPIH	137.9	223.92	0.69933	0.00543603	0.120764	0.918063
CACNB4	23.17	6.73	-1.7841	0.00545951	0.121118	0.91679
ADO	769.45	570.05	-0.432746	0.00551162	0.122004	0.913625
POLD3	235.89	325.39	0.464084	0.00551461	0.122004	0.913625
FUT4	399.24	560.26	0.488822	0.00553667	0.122324	0.912488
TMEM63A	801.02	1152.72	0.525123	0.00554706	0.122385	0.91227
SLC46A1	157.66	79.06	-0.99567	0.00557934	0.122485	0.911918
BCL2L1	2539.06	1841.98	-0.463036	0.00559711	0.122485	0.911918
CDRT4	10.17	0.17	-5.87957	0.00559989	0.122485	0.911918
CEBPZ	519.63	691.98	0.413252	0.00560607	0.122485	0.911918
TNFRSF21	981.64	1983.4	1.01471	0.00560708	0.122485	0.911918
PLXDC2	569.49	273.33	-1.059	0.00560904	0.122485	0.911918
SAMD8	953.97	718.38	-0.409195	0.00561599	0.122485	0.911918
SIPA1L2	203.35	87.68	-1.21364	0.00561637	0.122485	0.911918
SORBS3	772.58	576.66	-0.421949	0.0056201	0.122485	0.911918
APRT	417.89	590.25	0.4982	0.00564774	0.122921	0.910376
ISCA1	497.64	338.81	-0.554649	0.00566078	0.123038	0.909961
PCNA	682.02	922.17	0.435235	0.00575702	0.124826	0.903694
FAXDC2	159.33	82.22	-0.954439	0.00576281	0.124826	0.903694
ARL17B	37.78	70.11	0.892044	0.00577233	0.124826	0.903694
CAB39	1262.27	978.56	-0.367293	0.0057741	0.124826	0.903694
GOLGA8Q	11.07	31.43	1.50569	0.00581587	0.12556	0.901147
SLAMF8	1943.49	951.58	-1.03026	0.00584182	0.12588	0.900042
FCER1G	156.39	79.81	-0.970523	0.00584635	0.12588	0.900042
DAXX	1791.6	2817.37	0.653101	0.00585591	0.125918	0.899913
ZCCHC3	269.61	378.34	0.488782	0.00587697	0.126202	0.898934
CLDN12	1466.15	971.29	-0.594065	0.00589182	0.12622	0.898873
SAA1	32.92	8.9	-1.88773	0.0058935	0.12622	0.898873
MIB1	448.4	328.75	-0.447781	0.00590507	0.126299	0.898599
BACE2	602.32	993.58	0.722099	0.00595091	0.127111	0.895817
LSM4	394.83	622.46	0.656746	0.00600479	0.128092	0.892479
DENND4B	922.21	637.56	-0.532528	0.00602111	0.12827	0.891877
SGMS1	544.28	846.13	0.636539	0.00606511	0.129029	0.889314
PKIA	126.96	72.57	-0.806903	0.00607418	0.129029	0.889314
ARHGEF11	1307.15	1645.39	0.332005	0.0060833	0.129029	0.889314
CNNM4	861.37	622.01	-0.469697	0.00609287	0.129029	0.889314
PLEKHA5	262.85	493.06	0.907528	0.00610727	0.129029	0.889314
ZNF853	11.08	1.59	-2.79683	0.00610823	0.129029	0.889314
SYNM	183.35	76	-1.27047	0.00611289	0.129029	0.889314
SYT11	1184.51	845.79	-0.485918	0.00612348	0.129083	0.889132
OCRL	810.28	581.2	-0.479385	0.00613821	0.129224	0.888658
KDM4A	736.35	566.36	-0.378673	0.00616575	0.129382	0.888127
CCL28	235.42	103.83	-1.18108	0.00616764	0.129382	0.888127
RASSF5	102.03	176.52	0.790867	0.00617099	0.129382	0.888127
NOTUM	25.16	81.36	1.69339	0.00617789	0.129382	0.888127
GIPC1	872.57	1201.46	0.461446	0.00619477	0.129566	0.887507
EPHA2	171.56	315.47	0.878774	0.00621597	0.129763	0.88685
ATP8B1	150.1	71.79	-1.06402	0.00622028	0.129763	0.88685
S1PR3	3487.34	1836.58	-0.9251	0.00626738	0.130576	0.884137
GOLT1B	1177.61	1604.39	0.446166	0.00632042	0.131511	0.881039
AK3	1356.67	1792.61	0.401988	0.00633991	0.131746	0.880264
ZNF48	184.9	105.2	-0.813591	0.00639668	0.13251	0.877752
EDN1	641.19	328.99	-0.962694	0.00640113	0.13251	0.877752
AGFG1	1176.94	914.34	-0.364233	0.00640319	0.13251	0.877752
LEP	23.72	4.9	-2.27599	0.00641017	0.13251	0.877752
KCNK6	200.65	134.12	-0.581142	0.00642428	0.13251	0.877752
SEMA4G	25.91	8.36	-1.63234	0.00642734	0.13251	0.877752
CNN1	34.52	10.38	-1.73326	0.00643435	0.13251	0.877752
IL13RA1	2051.72	2684.31	0.387714	0.00647759	0.133085	0.87587
FUOM	49.43	22.14	-1.15854	0.00648646	0.133085	0.87587
EPAS1	3196.86	2137.09	-0.581007	0.00648712	0.133085	0.87587
SLC16A8	18.44	4.77	-1.94963	0.0064962	0.133102	0.875816
ELFN1	41.73	11.36	-1.87684	0.00651297	0.133276	0.875249
C6orf120	789.89	1106.42	0.486184	0.00654859	0.133746	0.873719
GLMP	2715.81	2034.96	-0.416385	0.00655259	0.133746	0.873719
NOLC1	804.35	1171.97	0.543036	0.00663711	0.135299	0.868704
EFEMP1	6733.05	3108.08	-1.11524	0.00668041	0.135898	0.866788
TWSG1	1486.53	1126.08	-0.400634	0.00668336	0.135898	0.866788
PF4V1	101.24	37.96	-1.41535	0.00669527	0.135968	0.866563
EBF3	426.18	249.71	-0.771235	0.0067327	0.136556	0.86469
RFC5	41.59	78.04	0.908029	0.00682422	0.138238	0.859374
ATP6V0A1	1155.95	854.07	-0.436661	0.00683828	0.138348	0.859026
DYNLT1	3398.48	4292.44	0.336909	0.00686018	0.13845	0.858707
FNDC3A	1632.24	1125.51	-0.53628	0.00686369	0.13845	0.858707
MRPS10	602.54	826.45	0.455861	0.00686914	0.13845	0.858707
ARSB	928.64	591.17	-0.651537	0.00688685	0.138524	0.858475
DLX2	8.64	29.31	1.76262	0.00690668	0.138524	0.858475
ADD3	4826.42	2629.99	-0.875897	0.00691138	0.138524	0.858475
PECAM1	69.41	20.75	-1.74215	0.00691564	0.138524	0.858475
FANCG	69.73	120.44	0.788455	0.00691586	0.138524	0.858475
CARS2	391.59	591.43	0.594872	0.00693636	0.138662	0.858043
RALGDS	375.95	225.33	-0.738496	0.00693999	0.138662	0.858043
TAF1C	450.08	616.65	0.454275	0.0069777	0.139242	0.856229
SPOCD1	776.16	415.61	-0.901118	0.00699851	0.139342	0.855917
MRPS27	398.28	528.93	0.409307	0.00700003	0.139342	0.855917
UBD	6872.26	12555.6	0.869471	0.0070095	0.139358	0.855867
ITGB6	30.58	9.89	-1.62824	0.00702526	0.139499	0.855429
NUCKS1	1793.54	2401.4	0.421063	0.00705464	0.13991	0.854152
PPHLN1	485.12	633.41	0.38481	0.00712391	0.14111	0.850443
DUSP22	446.5	696.97	0.642442	0.00719811	0.142395	0.846506
MARCHF2	343.99	225.28	-0.61062	0.00720651	0.142395	0.846506
KMT5A	475.02	326.59	-0.540511	0.00721565	0.142401	0.846488
SRXN1	1715.06	3042.37	0.826938	0.00726742	0.143124	0.844287
SRRM2	6066.11	4124.52	-0.556545	0.00727011	0.143124	0.844287
LOXL2	9784.7	6753.63	-0.534864	0.00734484	0.14427	0.840824
AK5	38.5	14.56	-1.40261	0.00734626	0.14427	0.840824
NAP1L5	147.72	227.6	0.623656	0.00741268	0.145315	0.837689
SFXN3	901.52	692.4	-0.380741	0.00741755	0.145315	0.837689
TCEAL1	259.51	177.59	-0.547249	0.00744396	0.145655	0.836674
S100A4	2614.82	1896.01	-0.463748	0.00747181	0.146023	0.83558
TRIM47	635.32	1198.3	0.915441	0.00750057	0.146156	0.835183
PLA2G4B	6.21	31.11	2.32466	0.00750679	0.146156	0.835183
EHD3	247.67	147.48	-0.74785	0.00750761	0.146156	0.835183
TCF7	154.51	247.13	0.677584	0.00751498	0.146156	0.835183
SLC6A6	2311.69	3584.14	0.632677	0.00753011	0.146273	0.834835
NUP85	209.42	314.53	0.586763	0.00755083	0.146333	0.834659
CAB39L	216.26	319.86	0.564692	0.00755136	0.146333	0.834659
GOPC	1918.86	2672.76	0.478082	0.00757265	0.146569	0.833959
NRXN2	722.72	517.4	-0.482151	0.00759744	0.146872	0.833062
NICN1	269.63	183.5	-0.555183	0.00763099	0.147218	0.832038
ZNF629	706.78	524.43	-0.430515	0.00763368	0.147218	0.832038
KIAA1671	189.33	108.53	-0.802782	0.00765157	0.147387	0.831542
POM121	1660.61	1111.2	-0.579598	0.00766575	0.147483	0.831258
PTDSS1	898.63	663.02	-0.438686	0.00767492	0.147483	0.831258
TOR3A	181.79	264.72	0.542209	0.00769755	0.147719	0.830564
NBPF1	188.19	107.49	-0.808066	0.00770964	0.147719	0.830564
OR1J2	24.56	4.57	-2.42718	0.00771475	0.147719	0.830564
ATG16L2	377.88	578.26	0.613784	0.00775297	0.148274	0.828934
RCC2	2742.17	3549.68	0.372371	0.00785564	0.150031	0.823819
CAND2	62.44	29.64	-1.075	0.00786348	0.150031	0.823819
CALCOCO1	2688.99	1786.73	-0.589741	0.0078836	0.150061	0.823733
CDK10	361.72	504.04	0.478662	0.0078837	0.150061	0.823733
SLC16A2	1395.44	834.51	-0.74172	0.00791895	0.150554	0.822309
H6PD	3842.01	2565.76	-0.582476	0.00798933	0.151712	0.818979
EMP1	4553.49	2924.44	-0.638813	0.00800495	0.15183	0.818643
APOL6	5476.38	4306.05	-0.346859	0.00803368	0.152195	0.817599
FNTA	495.96	676.06	0.446939	0.00806139	0.152541	0.816615
SLC12A6	328.95	218.18	-0.592342	0.00811469	0.153289	0.81449
RFC4	45.1	80.87	0.842572	0.00811999	0.153289	0.81449
HYI	198.13	109.16	-0.859906	0.00813187	0.153333	0.814364
ARHGAP10	375.58	266.42	-0.495421	0.00815252	0.153514	0.813852
FAHD2A	222.02	146.41	-0.600676	0.00816057	0.153514	0.813852
AGK	211.5	311.41	0.558164	0.00817455	0.153598	0.813616
ADAMTS2	10024.9	13666.1	0.447011	0.00818553	0.153624	0.81354
VPS26B	465.62	675.14	0.536045	0.00820491	0.153733	0.813234
LAPTM5	140.71	71.37	-0.979264	0.00821383	0.153733	0.813234
CAST	2704.4	1949.35	-0.472318	0.00821998	0.153733	0.813234
MRGPRX3	56.6	154.52	1.44902	0.00825206	0.154153	0.812047
ROBO4	30.6	75.04	1.29429	0.00829527	0.154781	0.810282
IL27RA	18.03	4.75	-1.92309	0.00831704	0.155007	0.809648
LRP10	17315.9	13645.1	-0.343714	0.00832944	0.155059	0.809504
ZNF23	300.33	499.81	0.734823	0.00834114	0.155092	0.809409
RIN1	192.21	274.27	0.512882	0.00835054	0.155092	0.809409
ZNF254	116.71	179.37	0.619918	0.00838492	0.155551	0.808126
PER3	83.55	151.5	0.858647	0.00841206	0.155633	0.807899
POLR3H	638.68	439.22	-0.540141	0.00841815	0.155633	0.807899
ABCF1	1233.04	1628.05	0.400926	0.00841833	0.155633	0.807899
MMP13	1064.07	2451.99	1.20436	0.00854788	0.157846	0.801766
ZNF143	223.87	320.67	0.518443	0.0085744	0.158111	0.801037
ITPR1	194.63	298.13	0.615238	0.0085819	0.158111	0.801037
SMIM30	308.2	447.28	0.537314	0.00859289	0.158133	0.800978
PSMD11	1429.25	1873.13	0.390192	0.00863231	0.158677	0.799487
KIAA1549L	187.5	103.96	-0.850884	0.00865242	0.158861	0.798983
ADORA1	392.12	207.55	-0.917798	0.00866208	0.158861	0.798983
RPS6KA1	27.98	69	1.30239	0.00871543	0.159657	0.796812
RUNX1T1	82.39	44.05	-0.903407	0.00883679	0.161696	0.7913
CASP1	481.05	702.39	0.546107	0.00885921	0.161922	0.790694
HAUS5	49.19	86.59	0.815828	0.00889728	0.162433	0.789324
PTGIS	3002.77	1839.11	-0.707288	0.00895484	0.163299	0.787017
PNRC2	1872.14	1456.44	-0.362241	0.00900673	0.164059	0.784999
LSM3	283.3	417.96	0.56102	0.00902739	0.164249	0.784496
OPHN1	78.12	44.46	-0.812989	0.00906017	0.16466	0.783413
PSMB5	1654.57	2114.6	0.353924	0.00913994	0.165922	0.780097
RAB3D	96.31	49.86	-0.949746	0.00917253	0.166326	0.779041
ENO1	38221.9	28165.9	-0.440448	0.00925372	0.16754	0.775881
NR1H3	131.79	70.39	-0.904682	0.00926034	0.16754	0.775881
ARFIP2	833.07	633.7	-0.394625	0.00931551	0.167818	0.775161
STAMBPL1	639.78	404.86	-0.660167	0.00931812	0.167818	0.775161
CRELD2	407.3	547.71	0.427331	0.00931865	0.167818	0.775161
TP53I3	610.18	902.88	0.565302	0.00932346	0.167818	0.775161
CHST7	59.24	31.29	-0.920792	0.00932787	0.167818	0.775161
LTBP2	16527.8	12255.5	-0.43146	0.00936352	0.168108	0.774411
MLXIP	2468.15	1902.57	-0.375483	0.00936489	0.168108	0.774411
AFF1	875.66	625.37	-0.485655	0.00938456	0.168273	0.773984
PTPN1	1285.01	1674.97	0.382358	0.00942605	0.168829	0.772553
RNF182	163.58	97.3	-0.749515	0.00948635	0.16972	0.770266
BPNT2	3970.91	2965.72	-0.421089	0.00951157	0.169831	0.769983
SEMA3A	53.46	134.56	1.33162	0.00951365	0.169831	0.769983
SOGA1	570.59	418.18	-0.448312	0.00957503	0.170395	0.768544
RNASEH2B	222.27	328.01	0.561427	0.00957736	0.170395	0.768544
SRRM1	1041.07	789.15	-0.399705	0.00958514	0.170395	0.768544
FZD2	792.08	444.59	-0.833191	0.00958761	0.170395	0.768544
RBCK1	3998.85	2955.95	-0.435963	0.00962197	0.170816	0.76747
SLC30A6	707.57	553.23	-0.354994	0.00966859	0.171414	0.765954
DIRAS3	118.99	40.83	-1.54319	0.00967693	0.171414	0.765954
QTRT1	146.57	213.63	0.543538	0.00972012	0.171989	0.764498
IER2	1111.84	1455.63	0.388686	0.00975427	0.172404	0.763453
GRAMD2B	618.66	378.25	-0.709808	0.0097675	0.172448	0.763341
SGSM2	581.58	401.59	-0.534246	0.00981941	0.173167	0.761535
GAMT	112.98	58.06	-0.960408	0.00983895	0.173167	0.761535
CERS1	18.46	4.43	-2.05922	0.0098405	0.173167	0.761535
APCDD1	33.54	10.54	-1.67021	0.00988159	0.173378	0.761006
CA12	25797.5	15921.9	-0.696218	0.00988188	0.173378	0.761006
SC5D	949.01	614.98	-0.625903	0.00988484	0.173378	0.761006
TANC2	627	403.05	-0.637506	0.0099604	0.174513	0.758172
RELB	1375.23	1787.19	0.37802	0.00998746	0.174646	0.757841
GAR1	268.28	386.68	0.527388	0.0099897	0.174646	0.757841
ACADVL	3902.5	5526.58	0.501989	0.0100302	0.174974	0.757028
CHRNA3	29.83	122.41	2.03687	0.0100493	0.174974	0.757028
ETHE1	313.78	431.66	0.460138	0.0100506	0.174974	0.757028
UBA7	1373.94	2180.57	0.666386	0.010052	0.174974	0.757028
AACS	400.8	551.36	0.46012	0.0101116	0.175822	0.754926
RNASEL	171.35	282.13	0.719456	0.0101354	0.176045	0.754376
IFITM10	312.66	476.15	0.60681	0.0101711	0.176475	0.753317
ZBTB17	418.66	571.28	0.448437	0.0101973	0.176658	0.752866
ILRUN	2471.33	1874.77	-0.398571	0.0102036	0.176658	0.752866
ACTR3	4988.66	3288.36	-0.601282	0.0102362	0.177032	0.751949
BCL3	826.12	1205.06	0.544684	0.0102989	0.177924	0.749765
SNX9	4118.3	3107.84	-0.406136	0.0103572	0.178739	0.74778
SVEP1	444.67	250.29	-0.829118	0.0104065	0.179397	0.746185
OSBP2	34.64	13.56	-1.35306	0.0104188	0.179418	0.746133
ZNF687	409.44	557.7	0.445825	0.0104587	0.179912	0.74494
SNAPC3	921.38	673.91	-0.451249	0.010477	0.180033	0.744647
CSRNP2	1252.47	934.41	-0.422647	0.0105823	0.181649	0.740767
UBE2R2	1576.66	1233.9	-0.353647	0.0106314	0.181878	0.740221
PTPN12	3949.49	2541.58	-0.635938	0.0106332	0.181878	0.740221
MPI	749.14	510.83	-0.552388	0.0106383	0.181878	0.740221
SCN1B	695.63	1155.59	0.732244	0.0106544	0.181878	0.740221
ZNF682	10.71	31.81	1.57109	0.0106556	0.181878	0.740221
FBXO38	536.71	396	-0.438625	0.0106634	0.181878	0.740221
THSD4	201.28	74	-1.4436	0.0106978	0.182237	0.739363
FNDC10	251.46	133.12	-0.917607	0.0107072	0.182237	0.739363
ARNT2	140.65	89.14	-0.658021	0.0107847	0.183039	0.737455
FANCI	75.52	141.41	0.904891	0.0107848	0.183039	0.737455
CNOT6	644.45	465.09	-0.470556	0.0107884	0.183039	0.737455
SYDE1	1418.41	922.46	-0.620727	0.0108036	0.183104	0.737303
TACSTD2	182.94	96.7	-0.919706	0.0108364	0.183366	0.736681
GREM1	14312.4	7488.35	-0.934548	0.0108446	0.183366	0.736681
TAOK1	1459.32	1032.22	-0.499543	0.010863	0.183366	0.736681
OTUD6B	173.47	112.44	-0.625575	0.0108647	0.183366	0.736681
VSIR	1027.16	544.84	-0.914751	0.0109176	0.184065	0.735028
MDFI	15.77	67.75	2.1032	0.0109578	0.18455	0.733886
DPY30	320.77	227.91	-0.493123	0.0109937	0.18492	0.733015
KIF3C	784.69	535.77	-0.550518	0.0110028	0.18492	0.733015
JOSD2	186.59	268.5	0.524987	0.0110448	0.185212	0.732332
ARHGAP1	2743.41	2231.52	-0.29794	0.0110489	0.185212	0.732332
CHP1	1049.78	822.73	-0.351595	0.0110729	0.185212	0.732332
TSPAN2	2364.65	4588.17	0.956289	0.0110729	0.185212	0.732332
SLC66A3	178.56	123.19	-0.535577	0.0110777	0.185212	0.732332
TARS2	345.52	502.61	0.540674	0.0111014	0.185416	0.731853
ACSS1	44.25	20.87	-1.08395	0.0111153	0.185454	0.731763
ATL3	1699.79	1264.88	-0.426365	0.0111351	0.185593	0.731439
EGR2	592.55	263.67	-1.16819	0.0111515	0.185647	0.731311
FAM234A	3083.09	2225.55	-0.470216	0.011188	0.185647	0.731311
FANCC	62.45	102.84	0.719587	0.0111891	0.185647	0.731311
MICAL2	2213.02	1193.01	-0.891408	0.0111916	0.185647	0.731311
MCFD2	7585.57	5747.02	-0.400444	0.0111961	0.185647	0.731311
SLC4A4	67.9	30.06	-1.17569	0.0112083	0.185659	0.731285
MPP2	308.81	135.84	-1.18482	0.0113571	0.18793	0.726003
USP37	151.34	230.61	0.607638	0.0113959	0.188266	0.725227
KIF13B	215.71	127.91	-0.753937	0.0114021	0.188266	0.725227
SESN2	810.84	1290.29	0.670202	0.0114363	0.188266	0.725227
DDX60	1511.75	2105.82	0.478164	0.0114615	0.188266	0.725227
SLC7A1	2835.14	2016.76	-0.491376	0.0114621	0.188266	0.725227
SELENOM	2561.4	3985.58	0.637853	0.0114703	0.188266	0.725227
LVRN	86.48	18.8	-2.20167	0.0114719	0.188266	0.725227
ATP6V1G1	1685.61	2084.26	0.306262	0.0114746	0.188266	0.725227
SH3BGRL	1688.51	1249.66	-0.434214	0.0114854	0.188266	0.725227
PPP1R3B	723.51	458.7	-0.65746	0.0114945	0.188266	0.725227
MYADM	3795.15	2568.11	-0.563452	0.0116013	0.189649	0.722048
MED29	802.84	574.04	-0.483979	0.0116025	0.189649	0.722048
CDC42SE2	771.49	479.89	-0.684944	0.0116239	0.189806	0.721691
CXCL12	5849.08	2959.77	-0.982726	0.0116449	0.189956	0.721348
RNF181	1011.25	1294.71	0.356498	0.0117155	0.190761	0.719511
SIPA1L3	617.65	420.52	-0.554593	0.0117371	0.190761	0.719511
CDC5L	788.33	613.3	-0.362207	0.0117384	0.190761	0.719511
TDG	361.52	542.39	0.585239	0.0117417	0.190761	0.719511
TEX261	1780.56	1432.81	-0.313481	0.0117602	0.190869	0.719264
PPARG	25.5	54.5	1.09563	0.0117996	0.191315	0.718252
ABCA5	81.64	152.09	0.897506	0.0118208	0.191465	0.71791
XPO6	3339.37	2620.33	-0.349824	0.0118626	0.191863	0.717008
SCLT1	62.92	117.31	0.89881	0.0118805	0.191863	0.717008
SPOCK1	8272.86	5855.82	-0.498516	0.0118811	0.191863	0.717008
MARCHF4	270.02	100.69	-1.42311	0.0119174	0.191865	0.717004
C6orf132	383.01	198.15	-0.950772	0.0119196	0.191865	0.717004
IRF7	724.98	1073.15	0.565836	0.011925	0.191865	0.717004
MAP1LC3B	1691.16	1235.78	-0.45259	0.0119289	0.191865	0.717004
ALG10	57.91	101.21	0.805529	0.0120423	0.193344	0.71367
MAU2	1076.64	803.65	-0.421896	0.0120449	0.193344	0.71367
FBXL7	447.96	299.3	-0.581791	0.0121175	0.194315	0.711494
SNX22	61.62	28.18	-1.12857	0.0122019	0.195473	0.708913
FPGT	123.31	181.42	0.557048	0.0122186	0.195532	0.708783
SUGCT	52.2	27.03	-0.949699	0.0122312	0.195532	0.708783
RPL11	2853.67	3604.55	0.337001	0.0122515	0.195532	0.708783
CALM3	4033.96	3052.15	-0.402369	0.0122542	0.195532	0.708783
LCP1	25.14	112.67	2.16407	0.0122776	0.195712	0.708382
DHX58	972.16	1363.61	0.488165	0.0123579	0.196537	0.706557
PGGT1B	202.97	278.78	0.457881	0.0123671	0.196537	0.706557
DGAT2	78.37	130.31	0.733604	0.0123771	0.196537	0.706557
KIF4A	43.53	85.45	0.972985	0.0123855	0.196537	0.706557
BEST1	987.37	593.48	-0.734397	0.0123923	0.196537	0.706557
SASS6	18.42	45.87	1.31606	0.0124027	0.196537	0.706557
GUCY1A2	25.54	8.21	-1.63669	0.012503	0.197931	0.703487
NCOA7	878.61	1354.01	0.623942	0.0125557	0.19857	0.702086
LRIG3	433.35	764.78	0.819513	0.0126493	0.199854	0.699287
KCTD15	146.35	75.81	-0.948945	0.0126711	0.199865	0.699263
STEAP1	1407.65	1017.1	-0.468828	0.0126749	0.199865	0.699263
ICE2	227.43	321.55	0.49963	0.0126873	0.199865	0.699263
SERPINE1	91372.2	58146.9	-0.652053	0.0127447	0.200325	0.698265
ANTXR1	5970.32	4077.52	-0.550116	0.0127583	0.200325	0.698265
MTCL1	281.77	195.18	-0.529737	0.0127616	0.200325	0.698265
ZNF775	66.4	105.08	0.662231	0.0127672	0.200325	0.698265
PLXNA3	1351.85	873.48	-0.630093	0.0127788	0.200325	0.698265
BOP1	291.24	401.25	0.462289	0.0128063	0.200416	0.698068
SYNGR2	233.21	135.3	-0.785453	0.0128214	0.200416	0.698068
FAM174C	228.82	356.62	0.640138	0.0128219	0.200416	0.698068
ERGIC2	449.91	648.83	0.528193	0.0128739	0.201034	0.696731
LARP6	2274.29	1548.73	-0.554331	0.0129061	0.20131	0.696135
GLCCI1	95.46	51.1	-0.901572	0.0129167	0.20131	0.696135
MAP2K3	1694.34	1273.82	-0.411562	0.0129788	0.201991	0.694668
FOSL2	5434.38	4044.65	-0.426102	0.0129855	0.201991	0.694668
ECHDC1	1085.66	1473.94	0.44111	0.0130742	0.203107	0.692276
RSRC1	271.4	384.81	0.503727	0.0130825	0.203107	0.692276
FOXD1	316.75	138.86	-1.18973	0.0131028	0.203227	0.69202
RAD51AP1	26.09	55.82	1.09711	0.0131994	0.204527	0.689249
TUT7	746.17	565.68	-0.399508	0.0132462	0.204977	0.688294
LRRC49	118.16	187.33	0.664838	0.0132929	0.204977	0.688294
C3	20782.3	13979.6	-0.572028	0.0132985	0.204977	0.688294
CERS6	518.95	392.82	-0.401744	0.0133095	0.204977	0.688294
UNC93B1	1063.68	1419.31	0.416125	0.0133111	0.204977	0.688294
CASKIN2	165.06	102.47	-0.687771	0.0133165	0.204977	0.688294
RAB32	1203.51	1559.86	0.374162	0.0133177	0.204977	0.688294
DGAT1	314.5	445.7	0.503019	0.0134658	0.20706	0.683904
ITGA2	1615.11	886.78	-0.864982	0.0134849	0.207156	0.683703
MTF1	742.38	1136.22	0.614013	0.0135157	0.207372	0.683249
CCDC9B	666.58	351.08	-0.924972	0.0135259	0.207372	0.683249
UBXN1	657.13	861.91	0.391348	0.0135377	0.207372	0.683249
RPL35	2140.68	2686.12	0.327457	0.0135853	0.207903	0.68214
KLF5	213.27	312.26	0.550103	0.013603	0.207976	0.681987
MMP15	130.05	80.33	-0.695142	0.0136196	0.208031	0.681871
XRCC3	24.55	51.73	1.07512	0.0136651	0.208528	0.680835
KMT2E	955.41	683.78	-0.482585	0.0137383	0.209448	0.678925
NDUFB9	728.86	941.17	0.368802	0.0138054	0.2101	0.677574
ESYT1	1645.14	1148.84	-0.518036	0.0138373	0.2101	0.677574
PEAK1	1438.84	1007.98	-0.513432	0.0138439	0.2101	0.677574
FBXL6	91.86	145.73	0.665865	0.0138607	0.2101	0.677574
CTAGE4	54.32	93.07	0.776708	0.0138689	0.2101	0.677574
TUBB3	837.08	1536.93	0.876606	0.013871	0.2101	0.677574
FMN2	69.55	28.2	-1.30223	0.0138823	0.2101	0.677574
GEMIN2	77.89	117.69	0.59557	0.0138856	0.2101	0.677574
CPSF4	247.84	339.15	0.452485	0.0139297	0.210569	0.676606
RGS2	90.55	171.76	0.92368	0.0139559	0.210766	0.676199
PPM1H	84.73	153.11	0.853687	0.0139987	0.21088	0.675965
CHAF1A	99.81	168.36	0.754327	0.0140298	0.21088	0.675965
PINK1	2668.67	2044.26	-0.38454	0.0140346	0.21088	0.675965
G2E3	106.63	182.22	0.773135	0.0140367	0.21088	0.675965
WDHD1	105.11	162.84	0.631551	0.0140414	0.21088	0.675965
EDEM1	1150.13	750.4	-0.616071	0.0140424	0.21088	0.675965
DHDDS	663.45	490.77	-0.434946	0.0140603	0.21088	0.675965
CTXN1	73.32	37.29	-0.9755	0.0140752	0.21088	0.675965
NDST1	7347.55	5597.05	-0.392596	0.0140814	0.21088	0.675965
RBPMS	1297.45	1006.54	-0.366279	0.0141087	0.211093	0.675526
NEK10	42.58	19.35	-1.13786	0.0141399	0.211363	0.674971
FAM117B	161.7	102.1	-0.66341	0.0141842	0.211828	0.674016
POLA1	45.04	77.16	0.776593	0.0141995	0.21186	0.67395
PLSCR1	4883.56	5955.62	0.286319	0.0142214	0.21199	0.673684
ATMIN	824.18	598.56	-0.461472	0.0142532	0.211992	0.67368
KCNK2	662.88	345.14	-0.941557	0.0142566	0.211992	0.67368
CDC6	94.82	162.88	0.780463	0.0142611	0.211992	0.67368
GARRE1	300.91	204.85	-0.554777	0.0142857	0.212163	0.673331
HAUS8	28.35	57.65	1.02398	0.0143008	0.212191	0.673274
FBXO44	394.97	258.06	-0.614038	0.0143558	0.21281	0.672008
CRYBG1	325.57	500.02	0.619015	0.0144347	0.213565	0.670469
TUBD1	62.56	99.95	0.675872	0.0144372	0.213565	0.670469
PJA1	352.84	484.36	0.457061	0.0144466	0.213565	0.670469
TAPBP	14832.3	19678.5	0.407875	0.0145004	0.214164	0.669254
SLC6A2	17.65	3.92	-2.16934	0.014551	0.214563	0.668445
TPTEP2-CSNK1E	19.97	2.53	-2.98184	0.0145541	0.214563	0.668445
DACT1	3653.56	2004.21	-0.866272	0.0146113	0.215209	0.667139
TRAFD1	2715.48	3325.42	0.292333	0.0146567	0.215645	0.666261
KYNU	3434.92	5852.88	0.768869	0.0146677	0.215645	0.666261
THBS1	31678.7	8814.43	-1.84558	0.0147573	0.216764	0.664013
TMEM150A	345.98	262.3	-0.399475	0.0147799	0.216898	0.663745
CENPX	221.71	362.38	0.708782	0.0148163	0.216937	0.663666
NEFH	20.68	6.71	-1.62454	0.0148229	0.216937	0.663666
PITX3	3.12	13.65	2.12842	0.014833	0.216937	0.663666
NFKBIE	402.86	687.04	0.770113	0.0148426	0.216937	0.663666
CAMK1D	284.59	209	-0.44537	0.01485	0.216937	0.663666
NPEPL1	491.4	343.15	-0.518072	0.0148661	0.216975	0.66359
STK19	241.44	327.31	0.438969	0.0148847	0.217049	0.663442
PHACTR1	155.08	220.16	0.505515	0.0149213	0.217386	0.662768
PSMB10	3307.6	4023.97	0.282832	0.0150054	0.218372	0.660802
MAML2	781.2	540.54	-0.531276	0.0150162	0.218372	0.660802
SOS2	613.45	459.77	-0.416038	0.0150383	0.218451	0.660645
PUS3	139.56	200.64	0.523706	0.0150708	0.218451	0.660645
EFNA3	46.58	16.37	-1.50876	0.015076	0.218451	0.660645
KCNJ2	81.14	38.15	-1.08887	0.015081	0.218451	0.660645
CYCS	1913.87	1421.01	-0.429578	0.0150895	0.218451	0.660645
TIMM17B	352.03	488.93	0.47394	0.015123	0.21874	0.660072
WBP1L	1676.44	2371.65	0.500487	0.0151394	0.21878	0.659992
CKS1B	161.76	228.52	0.498492	0.0152157	0.219685	0.6582
IKBKE	559.95	775.1	0.469079	0.0152464	0.219892	0.657791
SPTLC3	280.79	409.83	0.545531	0.0152593	0.219892	0.657791
MIS12	240.72	325.03	0.433251	0.0152733	0.219892	0.657791
TEX2	492.78	344.66	-0.515762	0.0153017	0.219892	0.657791
RAD9A	114.82	173	0.591334	0.0153129	0.219892	0.657791
ASB1	591.24	388.01	-0.60764	0.0153288	0.219892	0.657791
NUP205	531.26	723.97	0.446504	0.0153439	0.219892	0.657791
ARHGAP19	58.75	97.81	0.735478	0.0153459	0.219892	0.657791
PTPRA	2004.94	1432.96	-0.484558	0.0153531	0.219892	0.657791
PPFIBP2	232.81	395.17	0.763323	0.015423	0.220545	0.656502
GINM1	1584.52	1037.07	-0.611533	0.0154261	0.220545	0.656502
BLVRA	667.79	872.24	0.385336	0.0154604	0.22084	0.655922
DPM3	130.66	83.46	-0.646697	0.0154988	0.221	0.655608
APBA3	270.46	359.69	0.411348	0.0155029	0.221	0.655608
NQO1	3190.81	5590.99	0.809184	0.0155256	0.221	0.655608
OXA1L	1289.2	1589.91	0.302473	0.0155438	0.221	0.655608
XBP1	3091.85	4027.95	0.381572	0.0155516	0.221	0.655608
BTN3A1	2291.36	3413.81	0.575181	0.0155613	0.221	0.655608
TSPAN13	58.89	24.38	-1.27205	0.01558	0.221	0.655608
QPRT	118.41	46.21	-1.35752	0.0155886	0.221	0.655608
RPS15	829.79	1150.91	0.47197	0.0155953	0.221	0.655608
C4B	187.56	294.88	0.652768	0.0156417	0.221462	0.654701
VPS28	446.41	604.13	0.436473	0.0159225	0.225225	0.647384
HSPB2	331.61	172.77	-0.940581	0.0159361	0.225225	0.647384
CLSTN1	4861.2	3286.84	-0.564609	0.0159789	0.225225	0.647384
ZWILCH	86.28	148.95	0.787712	0.0159866	0.225225	0.647384
GAB1	151.51	95.95	-0.659082	0.0160021	0.225225	0.647384
ZNF230	69.55	109.93	0.660362	0.0160115	0.225225	0.647384
LMOD1	19.06	5.52	-1.78755	0.0160142	0.225225	0.647384
UPK3BL1	129.85	212.74	0.712269	0.0160195	0.225225	0.647384
EML2	459.64	610.95	0.41055	0.0160395	0.225309	0.647221
RAB11FIP3	443.88	321.87	-0.463684	0.0160578	0.22537	0.647103
MEF2A	816.89	602.32	-0.439618	0.0160724	0.225378	0.647088
SLC35F1	116.18	48.22	-1.26857	0.016115	0.225778	0.646319
STAU2	309.9	199.29	-0.636974	0.0161621	0.226241	0.645428
KANK4	89.74	157.17	0.808537	0.0162354	0.227012	0.643951
TSPAN10	34.34	14.53	-1.24107	0.0162511	0.227012	0.643951
IFIH1	5112.39	6592.31	0.366786	0.0162599	0.227012	0.643951
KCND2	48.14	17.03	-1.49928	0.0162818	0.227012	0.643951
SCRN1	2262.64	1613.06	-0.488211	0.0162877	0.227012	0.643951
SLC3A2	3774.58	5061.95	0.423376	0.0163043	0.227047	0.643885
MALL	47.6	19.19	-1.31034	0.0163408	0.227327	0.643349
HNRNPAB	1387.5	1778.89	0.358488	0.0163567	0.227327	0.643349
MPV17	809.56	1072.58	0.405879	0.0163708	0.227327	0.643349
TMEM230	1804.79	2273.6	0.333147	0.016381	0.227327	0.643349
SESTD1	1007.35	1333.38	0.404521	0.0164677	0.228333	0.641431
TFAM	395.45	540.66	0.451246	0.0165288	0.228623	0.640881
NACC2	1386.07	801.19	-0.790788	0.0165311	0.228623	0.640881
NDOR1	389.59	499.18	0.35763	0.0165312	0.228623	0.640881
CBLL1	493.82	369.05	-0.420182	0.0165563	0.228773	0.640596
CKB	288.76	427.44	0.565834	0.0165866	0.228995	0.640175
SEMA3B	131.28	60.99	-1.10603	0.0166431	0.229577	0.639071
PORCN	498.92	309.69	-0.687984	0.0167152	0.230186	0.637921
STAT1	36588.7	29032	-0.333756	0.0167158	0.230186	0.637921
COQ10A	198.89	132.94	-0.581178	0.0167449	0.230379	0.637557
BAALC	32	83.51	1.38402	0.0167588	0.230379	0.637557
TPBGL	10.04	1.92	-2.38687	0.0167728	0.230379	0.637557
IL23A	103.08	273.22	1.40622	0.0168035	0.230469	0.637388
SCG5	164.33	71.03	-1.21011	0.016808	0.230469	0.637388
SLC38A9	384.76	529.62	0.460996	0.0168275	0.230539	0.637255
CARHSP1	689.06	438.27	-0.652817	0.0168888	0.231182	0.636046
CTF1	230.18	122.18	-0.913801	0.0169855	0.232165	0.634204
IFT43	249.4	341.04	0.451447	0.0169894	0.232165	0.634204
CCDC12	141.37	202.68	0.519728	0.0170316	0.232544	0.633496
FAM234B	208.22	304.02	0.546052	0.0170577	0.232702	0.633199
PLD3	5972.68	4489.53	-0.411814	0.0171103	0.233222	0.632231
MPP7	4.33	0.17	-4.67916	0.0171299	0.233292	0.6321
HOXD8	246.82	168.13	-0.553902	0.0172463	0.234584	0.629702
RFFL	315.74	477.43	0.59658	0.0172539	0.234584	0.629702
ASXL1	1465.35	1167.39	-0.327959	0.0172817	0.234763	0.62937
RHOF	55.64	29.92	-0.894896	0.0173248	0.234913	0.629093
NBPF10	1757.85	2186.41	0.314757	0.017343	0.234913	0.629093
ZNF395	1648.54	953.06	-0.790557	0.017358	0.234913	0.629093
ITFG1	2242.5	1590.49	-0.49564	0.0173646	0.234913	0.629093
GOLPH3	1364.33	1070.57	-0.349811	0.0173822	0.234913	0.629093
NDUFS2	2021.46	2464.56	0.285935	0.0173891	0.234913	0.629093
HMGXB4	497.08	632.14	0.346767	0.0174009	0.234913	0.629093
WDR37	448.35	571.42	0.349948	0.0174096	0.234913	0.629093
CDK1	29.44	65.78	1.15977	0.0174856	0.23574	0.627566
WNK4	28.61	8.14	-1.81271	0.0175307	0.23615	0.626811
NUP37	200.58	275.26	0.456618	0.0175949	0.236619	0.625951
SHC3	213.81	86.38	-1.30757	0.0175975	0.236619	0.625951
RRAS	1859.16	2307.61	0.311754	0.0176096	0.236619	0.625951
TRABD2A	21.26	5.07	-2.06661	0.0176652	0.237168	0.624944
PLXNA4	81.27	39.64	-1.0358	0.0177611	0.238102	0.623238
HSPG2	9547.25	7063.8	-0.43464	0.0177663	0.238102	0.623238
ATOX1	822.84	1164.25	0.500721	0.0177792	0.238102	0.623238
OGFR	2224.51	2764.06	0.313302	0.0178255	0.238524	0.622468
ARG2	28.03	52.19	0.896647	0.0179078	0.239227	0.62119
CREBL2	877.39	705.74	-0.314085	0.0179268	0.239227	0.62119
SGCE	1252.42	873.53	-0.519788	0.0179535	0.239227	0.62119
ANKRD28	706.34	444.1	-0.669495	0.0179692	0.239227	0.62119
ZBED5	323.6	436.26	0.430955	0.0179747	0.239227	0.62119
PLIN2	3238.71	2192.97	-0.562532	0.0179787	0.239227	0.62119
TLCD2	129.43	239.43	0.887448	0.0179852	0.239227	0.62119
AUP1	1421.29	1927.95	0.439872	0.0179971	0.239227	0.62119
MIIP	158.2	225.22	0.509592	0.0180551	0.2398	0.620151
SYNJ2	1928.8	1416.22	-0.445658	0.0181236	0.240511	0.618865
STC1	5860.72	1206.96	-2.27971	0.0181412	0.240547	0.6188
IL34	40.17	106.95	1.41282	0.0181953	0.240811	0.618324
SEPTIN8	523.67	796.51	0.605034	0.0181982	0.240811	0.618324
ANTXR2	4273.51	5632.75	0.398418	0.018206	0.240811	0.618324
RPS21	594.16	781.21	0.394853	0.0182992	0.241845	0.616463
RDH5	39.23	12.67	-1.63078	0.0183245	0.241979	0.616222
AKAP7	95.23	140.09	0.556876	0.0183552	0.242027	0.616136
TRAPPC6B	484.65	373.15	-0.377156	0.0183608	0.242027	0.616136
FN1	418006	314547	-0.410248	0.0183733	0.242027	0.616136
RCAN1	5519.19	3491.94	-0.660429	0.0184163	0.242396	0.615475
MTCH1	5416.7	4291.39	-0.335971	0.0184519	0.242666	0.614991
TADA2B	449.32	339.47	-0.404487	0.0185518	0.243781	0.613001
GPATCH4	146.48	241.52	0.721395	0.0185998	0.244112	0.61241
CORO2B	351.37	218.94	-0.682416	0.0186202	0.244112	0.61241
PCDHGC5	88.62	34.69	-1.35294	0.0186426	0.244112	0.61241
AGPS	802.31	1067.67	0.412232	0.0186573	0.244112	0.61241
HIVEP3	53.62	25.69	-1.06143	0.0186771	0.244112	0.61241
GPR68	3804.42	5211.68	0.454074	0.0186772	0.244112	0.61241
CDT1	15.67	43.12	1.46078	0.0187066	0.244112	0.61241
PFDN2	496.99	682.35	0.457299	0.0187312	0.244112	0.61241
GPC1	732.73	1148.59	0.648523	0.0187372	0.244112	0.61241
ADAT1	334.56	483.69	0.531809	0.0187412	0.244112	0.61241
DNAJB9	804.23	1240.18	0.624872	0.018744	0.244112	0.61241
QSOX1	51968.9	33668.7	-0.626242	0.0188073	0.244738	0.611298
NBPF19	1748.03	2315.26	0.405441	0.0190071	0.247138	0.607061
GDF10	8.55	0.63	-3.7549	0.0190634	0.24767	0.606127
CSNK1G3	649.38	507.66	-0.355207	0.0191403	0.248468	0.604729
PSMC2	1603.12	1957.18	0.287897	0.0191819	0.248808	0.604135
MTMR1	474.84	340.54	-0.479611	0.0192679	0.249466	0.602989
ATP6V1G2	9.71	1.59	-2.6064	0.0192736	0.249466	0.602989
MYO1E	1881.37	1430.3	-0.395463	0.0192792	0.249466	0.602989
RALGPS2	515.59	327.75	-0.653614	0.0193365	0.249864	0.602297
C5orf34	18.11	41.81	1.20731	0.019341	0.249864	0.602297
NDRG1	9095.15	5618.05	-0.695027	0.0193679	0.249884	0.602261
ZC3HC1	337.22	472.32	0.486051	0.0193811	0.249884	0.602261
SON	1718.17	2335.4	0.442803	0.0193892	0.249884	0.602261
MALSU1	239.75	320.99	0.421021	0.0194172	0.250044	0.601983
PRIMPOL	97.99	145.93	0.574471	0.0194563	0.250297	0.601544
MROH8	29.74	12.23	-1.28172	0.0194864	0.250297	0.601544
RNFT1	155.09	226.48	0.546331	0.0194973	0.250297	0.601544
DUSP6	436.87	267.83	-0.705881	0.0195006	0.250297	0.601544
ROS1	96.45	248.34	1.36445	0.0195264	0.250297	0.601544
NUP107	261	389.04	0.575895	0.0195301	0.250297	0.601544
RASL11B	37.01	119.65	1.69297	0.0195695	0.250602	0.601016
MCM5	153.65	303.18	0.98055	0.0197	0.251933	0.598715
ETFB	468.69	689.69	0.557293	0.0197048	0.251933	0.598715
ATP1B2	16.69	4.43	-1.91354	0.0197254	0.251996	0.598606
AGMO	13.07	33.57	1.36058	0.0197573	0.252203	0.598249
THRA	926.16	603.33	-0.618314	0.0197853	0.252216	0.598227
CD59	17026.9	14038.9	-0.278382	0.0197897	0.252216	0.598227
COL7A1	6401.66	11762.1	0.877625	0.0198972	0.253386	0.596217
CTC1	152.09	104.69	-0.53884	0.0199584	0.25391	0.59532
PBLD	98.46	63.71	-0.62812	0.0199773	0.25391	0.59532
CNST	418.31	295.87	-0.499612	0.0199857	0.25391	0.59532
PI4K2A	2877.87	2297.85	-0.324715	0.0200197	0.253952	0.595249
SLC7A8	315.06	170.5	-0.885816	0.0200539	0.253952	0.595249
RBFOX2	2582.97	2059.92	-0.32644	0.0200643	0.253952	0.595249
HNRNPDL	2092.14	1652.14	-0.340645	0.0200935	0.253952	0.595249
NDUFAF4	172.84	320.61	0.891379	0.0200938	0.253952	0.595249
HIPK2	951.33	588.01	-0.694104	0.020104	0.253952	0.595249
DRAP1	1360.45	1752.8	0.365582	0.0201107	0.253952	0.595249
YOD1	216.76	326.66	0.591646	0.0201153	0.253952	0.595249
IVNS1ABP	2080.65	1281.01	-0.69975	0.0201714	0.254265	0.594714
ZDHHC9	2460.9	3215.17	0.385708	0.0201951	0.254265	0.594714
KCNJ15	821.01	1210.5	0.560138	0.020199	0.254265	0.594714
TMEM101	470.45	650.61	0.467745	0.0202033	0.254265	0.594714
DUSP7	476.52	332.04	-0.521155	0.0202202	0.254278	0.594691
NUSAP1	21.16	47.53	1.16728	0.0203128	0.255242	0.593047
IFI44	2573.45	3424.45	0.412171	0.0203759	0.255719	0.592237
TXLNG	331.07	500.34	0.595748	0.0203825	0.255719	0.592237
POLR3D	668.46	950.02	0.507106	0.0204479	0.256339	0.591185
SAT1	9708.14	7379.24	-0.395724	0.0204705	0.256386	0.591106
CCDC32	281.45	376.71	0.420574	0.0204834	0.256386	0.591106
BCDIN3D	118.18	171.47	0.536975	0.0205078	0.256456	0.590987
APBB1	803.16	551.21	-0.543078	0.0205284	0.256456	0.590987
MEGF6	2068.26	1657.36	-0.319534	0.0205419	0.256456	0.590987
TLCD4	21.89	8.01	-1.44983	0.0205529	0.256456	0.590987
ZNF266	152.88	234.24	0.61559	0.0205904	0.256726	0.590531
RTKN	632.88	1063.76	0.749165	0.0206621	0.257337	0.589498
FRA10AC1	126.37	190.66	0.593381	0.0206714	0.257337	0.589498
HMGXB3	1465.78	1837.71	0.326239	0.0207141	0.25751	0.589206
ZNF362	481.14	291.67	-0.722122	0.0207318	0.25751	0.589206
PLXNA2	211.56	144.64	-0.548605	0.0207334	0.25751	0.589206
FHIP1A	15.58	44.1	1.50116	0.0207495	0.257511	0.589204
CMC4	92.44	45.42	-1.02517	0.0208118	0.258086	0.588236
SLC38A3	2.06	15.71	2.92819	0.0209112	0.259119	0.586501
CBWD2	376.57	280.08	-0.42705	0.0210228	0.260301	0.584525
PCNP	1695.22	1344.85	-0.334025	0.0210701	0.260685	0.583884
KIAA1522	854.13	1212.14	0.505018	0.021095	0.260794	0.583703
IRF2	819.53	1082.75	0.401827	0.021128	0.261001	0.583359
STAT2	8959.3	11646.4	0.378431	0.0212282	0.262037	0.581638
WNT3	59.44	32.35	-0.877396	0.0212717	0.26232	0.581168
NOL11	407.04	540.27	0.408522	0.0212838	0.26232	0.581168
LASP1	7654.96	5773.23	-0.407015	0.0213333	0.26261	0.58069
MT3	43.85	13.77	-1.67164	0.0213399	0.26261	0.58069
REEP3	1080.31	845.08	-0.354284	0.0214755	0.264076	0.578271
TMEM239	27.14	10.41	-1.38258	0.02151	0.264184	0.578093
IFI27L1	400.63	283.62	-0.498327	0.0215305	0.264184	0.578093
HDAC11	208.43	142.05	-0.553235	0.0215335	0.264184	0.578093
GABARAP	4666.11	3674.23	-0.34478	0.0215841	0.264413	0.577717
ELOVL4	112.29	64.08	-0.809251	0.0215851	0.264413	0.577717
PSMA2	2266.92	2925.84	0.368118	0.0216019	0.264418	0.577709
DDX23	1474.93	1783.59	0.274136	0.0216631	0.264965	0.576812
NTNG1	77.21	39.79	-0.956513	0.0217106	0.265129	0.576543
ASF1B	47.69	99.28	1.05796	0.0217253	0.265129	0.576543
DSN1	121.23	174.06	0.521882	0.0217259	0.265129	0.576543
MGME1	330.2	243.11	-0.441708	0.0217732	0.265177	0.576465
TRMT1	290.65	400.35	0.461987	0.0217888	0.265177	0.576465
GCNT4	30.2	61.75	1.03207	0.0218104	0.265177	0.576465
ODAPH	248.18	137.72	-0.849667	0.0218239	0.265177	0.576465
PRDM4	934.19	1234.34	0.401949	0.021827	0.265177	0.576465
ASCC2	687.84	524.42	-0.391343	0.0218288	0.265177	0.576465
TCEANC2	140.38	214.32	0.610466	0.021868	0.265453	0.576013
PTDSS2	597.9	455.92	-0.391105	0.0218957	0.265588	0.575791
CCDC126	62.93	103.76	0.721353	0.0219724	0.266253	0.574705
ARL6IP4	510.23	672.04	0.397384	0.0219956	0.266253	0.574705
ATP7B	42.6	22.54	-0.9186	0.0220001	0.266253	0.574705
PRR14L	564.71	744.76	0.399257	0.0220268	0.266375	0.574506
MCRIP2	71.94	110.96	0.625159	0.0220679	0.266672	0.574023
CSNK1A1	2931.4	3633.49	0.309768	0.0221015	0.266877	0.573689
C19orf38	50.94	23.7	-1.10392	0.0221713	0.267519	0.572646
TLNRD1	533.25	695.38	0.382982	0.0222085	0.267768	0.572242
SNX33	2120.97	1543.22	-0.458784	0.022403	0.269749	0.56904
PHKG2	163.55	249.11	0.607104	0.0224064	0.269749	0.56904
RTL8C	3559.58	2737.83	-0.378677	0.0224401	0.269952	0.568713
TONSL	46.75	82.77	0.824263	0.0224949	0.270409	0.567978
SIX4	123.75	194.88	0.655117	0.0225308	0.270437	0.567933
IL1RL1	41.66	11.39	-1.87153	0.0225308	0.270437	0.567933
PACS1	1167.16	882.53	-0.403291	0.0225679	0.27068	0.567544
RPRD2	660.73	498.07	-0.407716	0.0225995	0.270857	0.56726
SP6	490.28	1088.03	1.15004	0.0227103	0.271982	0.56546
APBB2	1457.71	1047.94	-0.476148	0.0227613	0.272391	0.564808
KLF10	1987.64	1594.02	-0.318393	0.0227827	0.272443	0.564724
RNF187	2224.26	1594.32	-0.480379	0.0228466	0.273005	0.56383
SMPD2	121.01	194.45	0.684296	0.0229572	0.274053	0.562166
KLHL23	0.19	7.39	5.31153	0.0229786	0.274053	0.562166
SEMA4B	804.4	1173.28	0.544564	0.0229965	0.274053	0.562166
SPATA5	52.47	86.02	0.713168	0.0230024	0.274053	0.562166
ETV6	522.47	677.76	0.375421	0.0230492	0.274282	0.561802
ALDH1B1	930.48	1448.74	0.638755	0.0230558	0.274282	0.561802
COL6A3	15790.8	10502.9	-0.588296	0.0230745	0.274302	0.561771
HIRA	819.99	1032.88	0.332987	0.0231324	0.274787	0.561004
XRCC1	371.47	520.38	0.486334	0.0232352	0.275804	0.559399
GLG1	5148.53	3694.89	-0.478627	0.0233491	0.276206	0.558766
IPO5	6381.54	4023.12	-0.665588	0.0233594	0.276206	0.558766
CYP2E1	39.52	18.09	-1.12724	0.0233708	0.276206	0.558766
DNAJB11	1294.58	1677.57	0.373893	0.0233755	0.276206	0.558766
CEP57	149.95	210.35	0.488317	0.0233981	0.276206	0.558766
INSYN2B	95.2	23.26	-2.03286	0.023402	0.276206	0.558766
SNX4	355.74	486.23	0.450845	0.0234021	0.276206	0.558766
THOC1	137.44	190.19	0.468618	0.0234065	0.276206	0.558766
KLHDC7B	181.91	86.83	-1.06704	0.0234764	0.276828	0.557789
SHOX	115.15	69.53	-0.72781	0.0235046	0.276958	0.557585
SLC22A18	221.9	157.29	-0.496489	0.0235239	0.276983	0.557547
ATP2A3	394.69	192.68	-1.03448	0.023699	0.278826	0.554667
TRIM16L	196.25	443.34	1.17573	0.0237151	0.278826	0.554667
ZNF318	378.1	284.06	-0.412556	0.0237399	0.278914	0.55453
ZSCAN5A	32.14	55.69	0.792878	0.0237729	0.278918	0.554523
EPS15	1307.1	1021.12	-0.356213	0.0237942	0.278918	0.554523
HIP1	535.06	367.02	-0.543849	0.0237955	0.278918	0.554523
STUM	4	0.17	-4.56678	0.0238097	0.278918	0.554523
CYP4V2	702	1036.22	0.561789	0.0238639	0.279288	0.553948
ACTL6A	412.63	544	0.398757	0.023889	0.279288	0.553948
EIF4H	7833.31	6195.31	-0.338446	0.0239096	0.279288	0.553948
TATDN1	156.49	245.32	0.648609	0.0239107	0.279288	0.553948
PDZD4	15.35	4.22	-1.86402	0.0240352	0.280189	0.552548
CUL1	1529.37	1887.35	0.30342	0.0240506	0.280189	0.552548
CFLAR	2958.32	2290.09	-0.369375	0.0240571	0.280189	0.552548
CHCHD7	263.73	194.94	-0.436029	0.0240575	0.280189	0.552548
TIMM44	152.19	218.19	0.519682	0.024135	0.280856	0.551516
RXFP1	23.66	8.1	-1.54639	0.0241497	0.280856	0.551516
DNAJC5	2461.5	1979.69	-0.314263	0.0241829	0.281039	0.551233
FAM104A	461.92	618.76	0.421745	0.0242024	0.281062	0.551198
TTC14	410.4	273.91	-0.583313	0.0242666	0.281426	0.550636
CWF19L2	119.02	170.09	0.515119	0.0242687	0.281426	0.550636
CYC1	1064.26	1419.48	0.415518	0.0244985	0.283886	0.546856
QKI	1947.31	2468.83	0.342346	0.0245474	0.284248	0.546302
DSE	2651.64	3830.09	0.530495	0.0245812	0.284435	0.546018
RPS27L	2995.87	2332.61	-0.361027	0.0246753	0.285194	0.544859
EMC2	809.74	1143.37	0.497754	0.0246932	0.285194	0.544859
ELF4	886.4	1160.37	0.388555	0.0247273	0.285194	0.544859
AFAP1L1	94.11	49.22	-0.935071	0.0247281	0.285194	0.544859
MGAM	9.66	1.9	-2.3494	0.0247484	0.285194	0.544859
PTPN23	658.79	816.21	0.309124	0.0247533	0.285194	0.544859
TMEM25	164.85	91.89	-0.843226	0.0248402	0.285493	0.544405
PALLD	2827.18	1948.85	-0.536743	0.0248568	0.285493	0.544405
MICAL3	503.08	373.71	-0.428876	0.0248603	0.285493	0.544405
RASA3	1451.76	1099.12	-0.401464	0.0248664	0.285493	0.544405
OARD1	156.61	226.94	0.53515	0.0248679	0.285493	0.544405
MCHR1	17.03	4.21	-2.0165	0.0249284	0.285984	0.543659
LAT2	24.9	10.18	-1.29026	0.0249763	0.286147	0.54341
PANK2	491.04	610.17	0.313356	0.0249783	0.286147	0.54341
NR2C1	321.39	242.22	-0.408009	0.0250228	0.286453	0.542946
LYN	454.22	250.24	-0.860068	0.0250761	0.286672	0.542615
SPINDOC	419.4	299.61	-0.485259	0.0250877	0.286672	0.542615
NR2C2AP	43.02	80.6	0.905887	0.0250954	0.286672	0.542615
WFDC3	51.75	18.36	-1.49475	0.0251735	0.287314	0.541643
AHCYL2	209.88	137.68	-0.608297	0.0252153	0.287314	0.541643
INIP	275.11	372.25	0.436251	0.0252164	0.287314	0.541643
PROSER2	55.61	31.26	-0.831205	0.0252421	0.287314	0.541643
SNX30	343.73	470.24	0.452114	0.0252479	0.287314	0.541643
FKBP15	762.34	928.89	0.285073	0.0252588	0.287314	0.541643
CPAMD8	22.59	8.11	-1.47834	0.0253046	0.287632	0.541162
TOB2	987.29	723.84	-0.447803	0.0253718	0.288187	0.540325
CDK6	586.92	958.7	0.707918	0.0253893	0.288187	0.540325
NUCB2	2326.22	1644.37	-0.500451	0.0255346	0.289632	0.538154
PACSIN3	136.59	82.32	-0.73055	0.0256469	0.290701	0.536553
NUDT19	240.09	161.7	-0.570283	0.0257281	0.291356	0.535576
RAD1	260.19	345.35	0.408471	0.0257409	0.291356	0.535576
PRMT9	132.3	183.45	0.471593	0.0257782	0.291573	0.535253
NREP	2734.31	3785.31	0.469231	0.0259138	0.292891	0.533293
RCSD1	149.91	103.22	-0.538403	0.0259325	0.292891	0.533293
TRUB1	235.62	322.56	0.4531	0.0259692	0.292891	0.533293
ZNF675	26.72	50.59	0.920752	0.025974	0.292891	0.533293
HSPBAP1	79.58	119.51	0.586544	0.0259858	0.292891	0.533293
OVOL1	3.09	13.22	2.09616	0.0260068	0.292923	0.533247
VPS4B	1489.81	1126.96	-0.402693	0.0260575	0.293288	0.532705
DDX49	412.56	554.36	0.426209	0.0261367	0.29337	0.532585
LOXL1	1903.93	1210.13	-0.65382	0.0261407	0.29337	0.532585
BRIP1	147.57	237.97	0.689371	0.0261565	0.29337	0.532585
UBE2M	914.77	654.78	-0.482407	0.0262051	0.29337	0.532585
CA13	89.42	200.04	1.16155	0.0262263	0.29337	0.532585
CEBPD	1161.21	742.17	-0.645814	0.0262498	0.29337	0.532585
CHCHD3	478.67	626.29	0.387802	0.0262501	0.29337	0.532585
ZFAND2B	171.81	232.61	0.4371	0.0262659	0.29337	0.532585
RAB8B	1213.27	840.48	-0.529612	0.0262691	0.29337	0.532585
ADI1	844.99	1103.38	0.384925	0.0262712	0.29337	0.532585
SLC7A7	252.59	153.9	-0.714749	0.0262741	0.29337	0.532585
IL4I1	870.83	1292.7	0.569918	0.0262941	0.29337	0.532585
ETNK1	514.6	709.12	0.462581	0.0263019	0.29337	0.532585
BNC1	230.5	165.5	-0.477956	0.0263566	0.293633	0.532195
PCYOX1	1117.39	842.56	-0.407279	0.0263669	0.293633	0.532195
PCOLCE	5002.13	6347.43	0.34363	0.0263802	0.293633	0.532195
TAF9B	41.44	120.64	1.54167	0.0264033	0.293687	0.532116
EXOSC6	232.74	385.95	0.729703	0.0264388	0.293688	0.532113
RIMBP3B	10.62	1.87	-2.50607	0.0264419	0.293688	0.532113
TTC9	56.83	23.88	-1.25112	0.0264689	0.293688	0.532113
TLR3	790.21	1181.38	0.580153	0.0264765	0.293688	0.532113
CAMTA2	933.04	706.92	-0.400393	0.026617	0.295019	0.530151
SGMS2	321.87	217.15	-0.567784	0.0266331	0.295019	0.530151
CTIF	1239.21	905.3	-0.452951	0.0266914	0.29544	0.529531
PRKD1	275.68	156.45	-0.817298	0.0267371	0.29544	0.529531
ARFGAP1	2073.43	2462.45	0.248076	0.0267383	0.29544	0.529531
GFRA1	860.71	489.76	-0.813464	0.0267446	0.29544	0.529531
FAM72C	11	1.93	-2.51268	0.0267661	0.295475	0.52948
FMNL3	1092.28	1394.18	0.352065	0.0268311	0.295989	0.528725
SUN2	2284.67	2896.33	0.342245	0.0268538	0.296036	0.528655
TIFA	426.19	656.82	0.623989	0.0269037	0.296383	0.528147
NDUFA10	532.9	668.3	0.326637	0.0269739	0.296719	0.527654
GALNT15	283.3	110.87	-1.35349	0.0269886	0.296719	0.527654
STX3	286.38	428.8	0.582377	0.0270052	0.296719	0.527654
TM2D3	540.32	674.74	0.320519	0.0270149	0.296719	0.527654
INPP5A	137.84	94.74	-0.540937	0.0270265	0.296719	0.527654
PTK7	944.72	569.87	-0.729271	0.0271567	0.297402	0.526656
H3-3A	1319.91	1668.16	0.337819	0.027158	0.297402	0.526656
METTL9	2039.24	1596.21	-0.353386	0.0271596	0.297402	0.526656
OAZ3	20	55.22	1.46518	0.0271627	0.297402	0.526656
FAS	2511.2	3186.36	0.343531	0.0272178	0.297671	0.526263
C1QTNF6	239.99	445.81	0.893456	0.0272359	0.297671	0.526263
TMEM126A	246.9	335.39	0.441929	0.0272428	0.297671	0.526263
CHTF18	28.52	57.1	1.00134	0.0272703	0.29777	0.526119
PRPSAP1	484.95	378.21	-0.358657	0.0273809	0.298673	0.524803
CXCL6	52250.6	32935.5	-0.665804	0.0273991	0.298673	0.524803
PPFIA4	485.36	237.55	-1.0308	0.0274087	0.298673	0.524803
APH1B	928.86	651.06	-0.512657	0.0275083	0.299467	0.523652
IP6K1	1677.25	1301.13	-0.366336	0.0275187	0.299467	0.523652
MEFV	307.95	519.53	0.754525	0.0275448	0.299548	0.523534
TNXB	703.5	354.53	-0.988626	0.0275908	0.29965	0.523386
PRKX	136.18	91.52	-0.573388	0.0275996	0.29965	0.523386
GTF2H2C	147.79	239.98	0.699358	0.0276101	0.29965	0.523386
SLC37A1	204.7	125.95	-0.700683	0.0276708	0.300106	0.522725
DENND1A	674.67	507.29	-0.411381	0.0277006	0.300227	0.52255
EI24	1634.18	1349.89	-0.275733	0.027771	0.300787	0.52174
ADAMTS10	831.26	1394.37	0.746254	0.0278104	0.301011	0.521418
TMEM129	927.39	537	-0.788251	0.027858	0.301324	0.520967
PPP6R1	1276.96	1625.59	0.34825	0.0278998	0.301573	0.520608
PRKCA	683.58	408.41	-0.743104	0.0279717	0.302147	0.519781
SUN1	833.86	667.97	-0.320015	0.0281743	0.304131	0.516939
MSRB1	526.47	750.25	0.511012	0.028345	0.305769	0.514607
RNF31	775.81	980.71	0.338129	0.028364	0.305769	0.514607
POLRMT	312.65	420.71	0.428271	0.0284762	0.306626	0.513391
ITPK1	406.69	304.73	-0.416418	0.028489	0.306626	0.513391
TNFAIP6	35197.8	43254.6	0.297368	0.0285069	0.306626	0.513391
LGALS9	1391.68	2120.95	0.607884	0.0285198	0.306626	0.513391
CUL2	763.17	1003.57	0.395068	0.0285851	0.307123	0.512687
FGGY	114.1	165.32	0.535014	0.0286243	0.307199	0.512581
LRRC1	22.49	46.96	1.06238	0.0286304	0.307199	0.512581
LATS2	1225.33	843.4	-0.538878	0.0287176	0.307929	0.51155
IDH3A	635.34	506.68	-0.326457	0.0287533	0.308107	0.511299
NAPRT	54.92	116.81	1.08867	0.0287896	0.308162	0.51122
CPNE1	1137.87	1479.7	0.378978	0.0287968	0.308162	0.51122
VBP1	504.58	395.46	-0.351551	0.0288213	0.30822	0.51114
GPC4	414.55	246.21	-0.751676	0.0289649	0.309549	0.50927
CEP290	101.37	157.82	0.638608	0.0291219	0.310931	0.507336
GCLM	1650.22	2505.05	0.602179	0.029159	0.310931	0.507336
RPL31	1467.35	1956.64	0.415173	0.0291675	0.310931	0.507336
RPS27A	2649.15	3467.02	0.388169	0.0291715	0.310931	0.507336
FBXW4	520.98	675.43	0.37459	0.0292335	0.311385	0.506702
FRY	169	62.29	-1.43996	0.029284	0.311716	0.50624
KIAA1755	788.58	525.06	-0.586765	0.0293095	0.311782	0.506149
INAFM2	355.67	227.7	-0.643389	0.0293583	0.312039	0.505791
ENDOV	122.93	173.62	0.498167	0.0293725	0.312039	0.505791
EHD2	6555.22	5328.89	-0.298808	0.0294076	0.312205	0.505559
KLHL12	437.69	580.6	0.407644	0.0294579	0.312533	0.505104
NR2F1	54.68	29.08	-0.911053	0.0297135	0.315037	0.501638
EPB41L2	1252.9	940.09	-0.414405	0.029781	0.315211	0.501399
LSM5	122	173.1	0.504628	0.0298041	0.315211	0.501399
POLG	388.45	526.02	0.437367	0.0298047	0.315211	0.501399
LENG8	2296.21	1580.34	-0.539014	0.0298082	0.315211	0.501399
STARD9	142.9	90.09	-0.665625	0.0298933	0.315849	0.50052
SLC35E1	1714.57	1316.66	-0.380965	0.0299079	0.315849	0.50052
QTRT2	337.15	453.62	0.428097	0.0299408	0.31599	0.500327
NFKBIA	3914.15	4929.74	0.332814	0.0300126	0.316359	0.49982
SPATA20	542.61	703.42	0.374487	0.0300151	0.316359	0.49982
LSM11	43.76	76.91	0.813684	0.0300808	0.316843	0.499155
NOB1	493.52	628.52	0.348855	0.030202	0.317815	0.497826
WDR89	135.62	196.48	0.534841	0.0302557	0.317815	0.497826
YARS2	224.78	300.7	0.419793	0.0302613	0.317815	0.497826
PDHA1	463.93	582.11	0.327386	0.03027	0.317815	0.497826
TET2	223.44	155.49	-0.523067	0.0302718	0.317815	0.497826
TNF	20.23	46.61	1.20396	0.0303638	0.318365	0.497075
SLC30A7	1169.34	1551.8	0.408241	0.0303638	0.318365	0.497075
RSAD2	6263.86	8101.45	0.371127	0.0303934	0.318467	0.496935
MRPL9	473.15	636.42	0.427686	0.0304164	0.318501	0.496889
HROB	58.93	90.59	0.620299	0.0304916	0.319081	0.4961
TRPS1	1138.99	1530.46	0.426209	0.0306806	0.32085	0.493698
KLHL21	4680.95	5719.11	0.288987	0.0307202	0.321055	0.493421
MTREX	527.98	690.37	0.386907	0.0307506	0.321164	0.493273
FOXRED1	214.68	306.04	0.511572	0.0308466	0.321531	0.492777
IL32	21398.7	31407.1	0.553568	0.0308518	0.321531	0.492777
LOXL3	2337.4	3667.6	0.649931	0.0308638	0.321531	0.492777
SYT17	8.36	1.31	-2.67492	0.0308657	0.321531	0.492777
GBA	6972.02	5455.92	-0.353756	0.0309133	0.321793	0.492423
SUV39H2	50.28	86.05	0.775076	0.0309405	0.321793	0.492423
ZFC3H1	417.65	284.76	-0.552544	0.0309509	0.321793	0.492423
ATE1	215.99	156.98	-0.460437	0.0310002	0.321951	0.49221
FMR1	780.48	987.3	0.339128	0.0310161	0.321951	0.49221
HGSNAT	1933.71	1560.11	-0.309721	0.0310261	0.321951	0.49221
C1QL2	23.68	8.13	-1.54208	0.0311075	0.3224	0.491605
PTCH1	44.77	24.58	-0.86508	0.0311105	0.3224	0.491605
FSIP1	29.88	14.03	-1.09051	0.0311495	0.3224	0.491605
SLC12A4	2440.25	2012.66	-0.277928	0.0311644	0.3224	0.491605
ZFPM1	107.84	71.03	-0.602516	0.0311696	0.3224	0.491605
MRPL38	382.57	509.28	0.412718	0.0312624	0.323152	0.490593
SAA2	19.59	5.81	-1.75283	0.0313251	0.323262	0.490446
RABAC1	2256.85	1736.02	-0.378525	0.0313258	0.323262	0.490446
RAB12	844.67	1073.02	0.345216	0.0313333	0.323262	0.490446
GPR160	34.03	14.83	-1.19852	0.0314094	0.323617	0.489969
GOLGA8F	30.47	9.49	-1.68299	0.0314458	0.323617	0.489969
SMC2	349.04	246.02	-0.504587	0.0314726	0.323617	0.489969
ACY1	183.61	263.58	0.521616	0.0314845	0.323617	0.489969
RAP2A	762.48	554.58	-0.459305	0.0314965	0.323617	0.489969
CAVIN1	10643.6	7971.78	-0.417009	0.0315203	0.323617	0.489969
SH3BP5L	1115.53	819.42	-0.445056	0.03153	0.323617	0.489969
CCDC14	262.45	447.91	0.771191	0.0315415	0.323617	0.489969
CNNM3	295.79	220.43	-0.424234	0.0315618	0.323617	0.489969
ORAI3	817.38	572.62	-0.513414	0.0316008	0.323617	0.489969
CDR2L	715.58	516.8	-0.469511	0.0316071	0.323617	0.489969
GRIN3B	10.41	1.91	-2.44444	0.0316092	0.323617	0.489969
ERBB2	756.95	607.27	-0.31786	0.0316442	0.32377	0.489764
CDCP1	3887.59	2009.19	-0.952259	0.0317215	0.324354	0.488981
CEP250	253.16	189.43	-0.418369	0.0317521	0.324411	0.488904
WFS1	705.74	520.61	-0.438941	0.0317712	0.324411	0.488904
POLR2H	643.66	804.47	0.321738	0.0317876	0.324411	0.488904
PTPRB	12.31	1.9	-2.69213	0.0318233	0.32457	0.488692
HVCN1	22.12	9.51	-1.21755	0.0319195	0.325233	0.487805
INAVA	5.56	17.8	1.67835	0.0319288	0.325233	0.487805
PCBD1	175.62	125.03	-0.490158	0.0320885	0.326653	0.485913
RPL36	1200.04	1524.45	0.345208	0.0321576	0.326999	0.485453
RORA	638.17	429.43	-0.571507	0.0321632	0.326999	0.485453
ANOS1	11.4	2.87	-1.99164	0.0322135	0.327005	0.485446
MACROH2A1	1008.33	769.51	-0.389947	0.0322314	0.327005	0.485446
PTPRE	771.01	526.89	-0.54925	0.0322349	0.327005	0.485446
CLIC3	550.88	278.12	-0.986054	0.0322451	0.327005	0.485446
RFC3	44.74	80.12	0.840542	0.032272	0.327072	0.485357
UBOX5	276.12	212.29	-0.379249	0.0323822	0.32791	0.484245
RPL10A	1984.7	2825.59	0.50963	0.0323955	0.32791	0.484245
IFRD2	489.9	654.29	0.41744	0.0324418	0.328173	0.483898
DCTPP1	166.49	256.38	0.622805	0.0324795	0.328347	0.483667
SUDS3	610.66	473.89	-0.365801	0.032503	0.328378	0.483626
SLC7A11	1356.39	2603.68	0.94078	0.0326074	0.3288	0.483068
HCK	1323.37	665.32	-0.992102	0.0326081	0.3288	0.483068
NCAPH2	219.07	292.16	0.415347	0.032626	0.3288	0.483068
H1-10	1490.51	1978.75	0.408783	0.0326265	0.3288	0.483068
MLPH	202.51	118.12	-0.777693	0.0326851	0.329122	0.482643
ABT1	293.18	373.74	0.350282	0.0326994	0.329122	0.482643
THOC5	476.27	368.42	-0.370441	0.0327728	0.329307	0.482399
SLC25A28	1806.91	2245.74	0.313663	0.0327743	0.329307	0.482399
MGST1	5234.43	8340.79	0.672151	0.0327792	0.329307	0.482399
NUP160	582.84	765.2	0.392719	0.0328408	0.32972	0.481855
EIF3E	1956.4	2550.97	0.382848	0.0328875	0.329983	0.481508
TALDO1	1819.55	2576.51	0.501836	0.0329484	0.330388	0.480976
SLC39A14	24153.3	17562.7	-0.459709	0.0329919	0.330405	0.480954
RFLNB	133.2	85.54	-0.638947	0.0330028	0.330405	0.480954
RPL23	1868.7	2508.11	0.424559	0.033013	0.330405	0.480954
DTYMK	114.82	173.19	0.59298	0.0330476	0.330405	0.480954
GSDMD	1118.2	1542.8	0.464368	0.0330528	0.330405	0.480954
COTL1	2176.96	1684.94	-0.369619	0.0331142	0.330813	0.480417
CUL3	900.85	735.8	-0.291971	0.0331963	0.331427	0.479612
GALNT9	19.86	73.68	1.8915	0.0332434	0.331692	0.479265
CALM2	7740.46	5961.42	-0.376764	0.0333171	0.332221	0.478572
HIC2	90.85	59.11	-0.620143	0.0333733	0.332575	0.47811
PRDM6	61.62	106.46	0.788918	0.0334169	0.332597	0.478082
YJU2B	208.73	292.44	0.486518	0.03342	0.332597	0.478082
GALK2	241.86	320.99	0.408364	0.0334375	0.332597	0.478082
RNF130	424.46	305.76	-0.473216	0.0335347	0.333357	0.47709
NTRK1	68.03	168.06	1.30468	0.0335849	0.333447	0.476974
ATL2	359.46	476.02	0.405209	0.0335851	0.333447	0.476974
WIZ	1029.4	819.7	-0.328638	0.0336258	0.333644	0.476717
FTH1	399054	308376	-0.371896	0.0337943	0.335109	0.474813
RAB10	3555.68	2761.84	-0.364499	0.0338453	0.335409	0.474425
TRIM62	154.31	107.79	-0.517657	0.0338744	0.33549	0.474321
F3	395.97	201.12	-0.977341	0.0338972	0.335509	0.474295
FOXK2	841.21	664.86	-0.339412	0.0339311	0.335552	0.47424
MBOAT7	1301.95	1015.12	-0.359022	0.0339433	0.335552	0.47424
CDC25A	61.51	111.93	0.863767	0.0340579	0.336478	0.473043
FBXO27	120.36	75.91	-0.665029	0.0341137	0.336823	0.472598
NRCAM	74.78	40.71	-0.877317	0.0342995	0.33845	0.470506
ELL	914.63	674.6	-0.439155	0.0343587	0.338826	0.470023
INTS7	179.54	263.91	0.555796	0.0344043	0.339068	0.469713
CSMD2	37.9	13.7	-1.46756	0.0344469	0.33928	0.469442
NECTIN3	718.74	556.5	-0.369087	0.0345618	0.340172	0.468301
SCARF1	41.65	84.42	1.01906	0.0345798	0.340172	0.468301
GRB2	1809.22	1522.07	-0.249332	0.0347053	0.341198	0.466994
HBP1	2841.63	2162.96	-0.393713	0.0348167	0.341899	0.466102
BTG3	1159.18	1436.51	0.309462	0.034824	0.341899	0.466102
KLHDC3	1096.2	1362.63	0.313891	0.0348404	0.341899	0.466102
VKORC1L1	437.73	566.12	0.371045	0.0348909	0.342152	0.465781
TRMT61B	121.6	175.01	0.525267	0.0349144	0.342152	0.465781
PTRH2	263.11	343.82	0.385979	0.0349299	0.342152	0.465781
CPQ	1185.9	1426	0.265991	0.0349617	0.342254	0.465651
USP6NL	338.9	254.85	-0.411204	0.0350551	0.342759	0.465011
IFNGR2	1624.5	1924.87	0.244763	0.0350558	0.342759	0.465011
ZFP37	22.78	44.86	0.977529	0.0350822	0.342808	0.464949
WDSUB1	103	70.24	-0.552189	0.0351122	0.342893	0.464841
SIMC1	113.38	78.63	-0.528035	0.0352551	0.343702	0.463818
FBXW11	1046.48	840.2	-0.316737	0.0352563	0.343702	0.463818
CHI3L2	2361.92	1428.75	-0.725201	0.0352658	0.343702	0.463818
SLC1A2	69.85	29.48	-1.24464	0.0353062	0.343702	0.463818
PSMC3IP	32.59	67	1.03982	0.0353215	0.343702	0.463818
AGPAT2	615.4	449.96	-0.451717	0.0353233	0.343702	0.463818
SMO	69.96	37.3	-0.907559	0.035446	0.344687	0.462574
GSTA4	76.24	145.44	0.931817	0.0355258	0.345025	0.46215
PNRC1	3453.56	4510.32	0.385145	0.0355268	0.345025	0.46215
ZNF93	31.47	56.06	0.833007	0.0355498	0.345025	0.46215
PDHX	716.57	876.3	0.290309	0.0356144	0.345025	0.46215
SPINK13	155.32	60.8	-1.35315	0.0356151	0.345025	0.46215
RAP1GAP2	64.23	34.61	-0.892275	0.0356156	0.345025	0.46215
HAT1	688.39	843.41	0.292997	0.0356308	0.345025	0.46215
RPS7	1992.8	2610.52	0.389543	0.0356738	0.345233	0.461888
HELLS	32.39	69.16	1.09453	0.0357479	0.345742	0.461248
KCTD1	139.46	95.26	-0.549925	0.0358337	0.346364	0.460468
PPIF	2401.83	3304	0.460083	0.0358715	0.346521	0.46027
C15orf61	79.1	47.78	-0.727164	0.0359519	0.346842	0.459869
PPT1	1222.1	1605.83	0.393962	0.0359693	0.346842	0.459869
SEC31A	2422.18	3206.78	0.404817	0.0359867	0.346842	0.459869
ANAPC15	140	94.83	-0.562011	0.035991	0.346842	0.459869
KDELR1	3501.41	2902.89	-0.270446	0.0360534	0.347235	0.459376
PAXX	47.83	83.9	0.810611	0.0360932	0.347411	0.459157
MCM2	130.08	218.68	0.749481	0.0361402	0.347655	0.458852
NACA	2522.44	3116.44	0.305078	0.036194	0.347964	0.458466
PIDD1	145.47	199.07	0.452569	0.0362525	0.348319	0.458023
RBBP5	244.27	326.79	0.419908	0.03633	0.348693	0.457557
WTAP	6726.28	5215.6	-0.366977	0.0363348	0.348693	0.457557
CCIN	67.08	34.34	-0.965866	0.0364024	0.348855	0.457356
DTD1	340.58	251.68	-0.436385	0.0364078	0.348855	0.457356
GSTO2	196.6	124.07	-0.664037	0.0364167	0.348855	0.457356
TMEM185A	470.65	356.94	-0.398948	0.0364631	0.349091	0.457062
PLAT	1349.99	463.52	-1.54225	0.0364959	0.349181	0.456949
COLGALT2	14.92	33.05	1.14732	0.0365311	0.349181	0.456949
ADAMTSL1	492.08	324.23	-0.601873	0.0365726	0.349181	0.456949
IL36B	246.24	101.87	-1.27335	0.036576	0.349181	0.456949
ATG2A	692.25	881.76	0.349088	0.0366181	0.349181	0.456949
NKAPD1	508.93	394.59	-0.367128	0.0366181	0.349181	0.456949
PDCD5	668.01	851.89	0.350788	0.0366245	0.349181	0.456949
ZNF273	32.93	56.76	0.785487	0.0366541	0.349256	0.456856
WBP11	788.78	1002.23	0.345522	0.0366899	0.34939	0.456689
DDIAS	12.88	29.95	1.21727	0.0367285	0.349551	0.456489
PNPLA2	1586.02	1166.53	-0.443188	0.0368996	0.350971	0.454728
RHOH	2.07	10.52	2.34236	0.0369567	0.351307	0.454313
HEXIM1	1756.59	1164.65	-0.592886	0.0371409	0.35285	0.45241
GIN1	77.14	110.62	0.520151	0.0372002	0.353078	0.452129
GADD45GIP1	274.13	357.19	0.381855	0.0372089	0.353078	0.452129
LMLN2	0.18	3.59	4.30479	0.0372498	0.353258	0.451908
GPM6B	15.59	4.23	-1.88367	0.0373215	0.35373	0.451329
USP30	182.03	243.09	0.417263	0.0375142	0.355346	0.449348
TOR1AIP1	1524.52	1827.14	0.261231	0.0375537	0.355511	0.449147
EBPL	124.78	83.85	-0.573461	0.0376006	0.355746	0.44886
ARHGEF4	44.18	21.87	-1.01477	0.037681	0.355878	0.448699
RASSF7	26.91	11.34	-1.24679	0.0376987	0.355878	0.448699
MOB3A	763.44	1001.31	0.391302	0.0377002	0.355878	0.448699
GCA	161.72	259.31	0.68116	0.0377031	0.355878	0.448699
ACAD11	323.07	239.62	-0.431076	0.0377685	0.356287	0.4482
PDK2	613.9	432.46	-0.505441	0.0378613	0.356952	0.44739
SLC35B2	2544.93	1982.64	-0.360203	0.0379366	0.357453	0.446781
PIK3R2	919.37	756.29	-0.281706	0.0379985	0.357827	0.446327
ORC2	283.27	366.44	0.37138	0.0380876	0.358455	0.445565
LDLR	2285.59	1407.47	-0.699467	0.0381721	0.358786	0.445165
BICD1	209.85	153.89	-0.447442	0.0381808	0.358786	0.445165
BNIP3L	4682.41	3429.89	-0.449089	0.0381896	0.358786	0.445165
ALDH2	1365.06	2288.22	0.745266	0.0383558	0.359981	0.443721
TMEM9	932.43	734.72	-0.343805	0.0383615	0.359981	0.443721
ABCC4	606.45	308.56	-0.974832	0.0384784	0.360867	0.442653
CCDC159	32.4	57.85	0.836244	0.0385473	0.361303	0.442129
IFT88	143.77	199.45	0.472277	0.0386439	0.361911	0.441399
PCSK1	321.22	617.51	0.942896	0.0386888	0.361911	0.441399
ZNF385D	53.55	103.25	0.947314	0.0387156	0.361911	0.441399
UST	563.28	421.05	-0.41987	0.0387231	0.361911	0.441399
COLEC12	107.87	38.2	-1.49748	0.0387435	0.361911	0.441399
IL1RAP	410.86	288.62	-0.509499	0.0387472	0.361911	0.441399
CAPN7	553.58	672.17	0.28003	0.0388568	0.362549	0.440633
RPUSD1	306.48	229.14	-0.41957	0.0388607	0.362549	0.440633
PGM2L1	433.82	617.39	0.509079	0.0388855	0.362558	0.440623
CHTF8	1882.59	1422.55	-0.404237	0.0389335	0.362558	0.440623
UTP23	281.6	362.34	0.363656	0.0389511	0.362558	0.440623
CLK2	317.72	422.69	0.411877	0.0389567	0.362558	0.440623
CAVIN3	282.8	184.31	-0.617652	0.0390012	0.362558	0.440623
TRIM46	128.97	77.59	-0.733173	0.0390139	0.362558	0.440623
COX17	255.18	342.06	0.422715	0.0390305	0.362558	0.440623
SLC25A13	443.12	632.37	0.513074	0.0390528	0.362558	0.440623
KLHL15	124.94	175.15	0.487365	0.0390697	0.362558	0.440623
ARHGAP24	419.02	325.3	-0.365267	0.0390965	0.362558	0.440623
RAP2C	790.75	971.46	0.29694	0.0391095	0.362558	0.440623
GTF2B	568.91	693.56	0.285818	0.0392235	0.363405	0.439609
MCM8	47.75	83.23	0.801668	0.0392535	0.363474	0.439527
ALKBH5	1816.79	2367.91	0.382226	0.039355	0.363634	0.439336
SATB1	190.07	132.18	-0.523997	0.0393638	0.363634	0.439336
FAM149B1	394.62	313.96	-0.329891	0.0393795	0.363634	0.439336
TTYH3	2176.05	1758.44	-0.307417	0.0393871	0.363634	0.439336
CRLF1	9577.56	14855.4	0.633259	0.0393872	0.363634	0.439336
SLC26A11	473.7	600.69	0.342656	0.0394065	0.363634	0.439336
TINF2	1027.85	1228.6	0.257375	0.0394798	0.364094	0.438786
SAYSD1	207.75	280.28	0.43204	0.0395016	0.364094	0.438786
CFH	12695.8	10312.8	-0.299923	0.0395766	0.364576	0.438211
HDGFL3	1404.33	1776.38	0.339057	0.0396973	0.365369	0.437268
FBLN7	273.17	154.25	-0.82453	0.0397165	0.365369	0.437268
CD248	4088.41	1089.05	-1.90847	0.0397308	0.365369	0.437268
CHFR	353	461.28	0.386006	0.039791	0.365713	0.436859
NHLH1	19.77	7.75	-1.35156	0.0398442	0.365993	0.436527
FKBP8	3826.8	2984.64	-0.358583	0.03987	0.366021	0.436494
ZNF302	355.79	500.04	0.491029	0.0400496	0.367165	0.435139
MAP3K3	757.74	566.85	-0.418735	0.0400767	0.367165	0.435139
ATF5	2002.71	2663.17	0.411195	0.0400907	0.367165	0.435139
MT1M	2265.4	3436.39	0.601127	0.0401025	0.367165	0.435139
C1orf54	135.5	196.76	0.538185	0.0401497	0.367165	0.435139
ZDHHC3	1096.38	897.98	-0.28799	0.0401691	0.367165	0.435139
NMD3	469.87	649.42	0.466899	0.0401695	0.367165	0.435139
DHX16	869.63	714.86	-0.282733	0.0401772	0.367165	0.435139
CUX1	1378.23	1101.05	-0.32393	0.0402178	0.367327	0.434947
ERGIC1	2648.28	2051.98	-0.368042	0.0403032	0.367716	0.434487
C2orf72	35.23	13.71	-1.36137	0.0403061	0.367716	0.434487
RNPS1	1093.85	1337.95	0.290612	0.0404019	0.368381	0.433703
NLRP1	426.44	302.67	-0.494607	0.0404675	0.36877	0.433244
RUNDC1	404.04	322.9	-0.323404	0.0405922	0.369697	0.432155
RBM10	579	702.25	0.278426	0.0406771	0.370128	0.431648
ETV5	769.94	602.52	-0.353723	0.0407078	0.370128	0.431648
MRPS31	130.25	181.72	0.48046	0.0407085	0.370128	0.431648
TRABD2B	65.78	183.04	1.4765	0.0409254	0.371889	0.429586
MAGOHB	208.21	277.67	0.415312	0.0409644	0.372034	0.429417
HIC1	438.13	645.09	0.558127	0.0410122	0.372257	0.429157
CLN6	295.38	426.78	0.530912	0.0410651	0.372267	0.429145
UCHL1	3313.01	2284.37	-0.536346	0.0410685	0.372267	0.429145
DPP7	1707.53	2124.44	0.315176	0.0410827	0.372267	0.429145
ABHD14A	218.59	127.6	-0.776597	0.0411496	0.372513	0.428858
NUP188	1047.55	863.34	-0.279015	0.0411562	0.372513	0.428858
IFNG	1.02	8.84	3.10955	0.0411798	0.372518	0.428853
CTSB	44485.2	32285.6	-0.462436	0.0412086	0.372568	0.428794
BVES	760.17	1038.98	0.450778	0.0412556	0.372784	0.428543
IFT74	171.17	233.1	0.445501	0.0413174	0.373045	0.428238
TBL2	960.51	743.79	-0.368916	0.0413607	0.373045	0.428238
HACL1	206.81	312.77	0.596807	0.0413699	0.373045	0.428238
POMT1	426.06	320.03	-0.412851	0.0414067	0.373045	0.428238
AS3MT	29.98	13.63	-1.13663	0.0414397	0.373045	0.428238
CWC27	306.87	410.2	0.418699	0.0414414	0.373045	0.428238
ZNF652	242.94	337.96	0.47626	0.0414469	0.373045	0.428238
QARS1	1253.14	1521.45	0.279895	0.0414962	0.373075	0.428204
ZNF462	356.74	475.59	0.41484	0.0415112	0.373075	0.428204
PRKAA1	729.73	926.55	0.34449	0.0415198	0.373075	0.428204
ITGBL1	1580.36	1212.98	-0.381701	0.0415504	0.373141	0.428127
DONSON	132.32	188.02	0.506876	0.0416198	0.373557	0.427643
MCOLN1	505.43	672.74	0.412538	0.0417308	0.374158	0.426944
FBXW7	211.44	277.72	0.393392	0.0417334	0.374158	0.426944
RPL24	1916.55	2408.68	0.329729	0.0417727	0.374206	0.426889
ATP6V0E1	5581.78	4474.69	-0.318938	0.0417893	0.374206	0.426889
AHI1	555.93	396.89	-0.486148	0.0418085	0.374206	0.426889
ARF6	2470.07	2046.21	-0.271596	0.0418397	0.374256	0.426831
NOL4L	409.3	590.28	0.528231	0.041915	0.374256	0.426831
PYGM	210.45	84.99	-1.30817	0.04193	0.374256	0.426831
PFN2	2061.6	1686.93	-0.289365	0.0419694	0.374256	0.426831
CRIP1	85.87	53.16	-0.691614	0.0419854	0.374256	0.426831
NOX4	341.4	200.6	-0.767151	0.042009	0.374256	0.426831
ACVRL1	456.45	628.72	0.461966	0.0420192	0.374256	0.426831
TP53INP2	1566.74	2232.33	0.510784	0.0420366	0.374256	0.426831
NME1-NME2	13.51	30.84	1.19041	0.0420842	0.374256	0.426831
DNAJC8	1160.93	1454.21	0.324951	0.0421587	0.374256	0.426831
SNRNP25	75.85	47.77	-0.666998	0.0421588	0.374256	0.426831
SNX24	316.83	229.49	-0.465243	0.0421612	0.374256	0.426831
DENND6A	283.26	387.54	0.452207	0.0421722	0.374256	0.426831
SUV39H1	50.15	76.38	0.607053	0.0421859	0.374256	0.426831
TAF5	58.17	86.59	0.573825	0.0421943	0.374256	0.426831
COQ4	319.41	427.86	0.421755	0.0421992	0.374256	0.426831
MPP3	63.1	105.71	0.744369	0.0422097	0.374256	0.426831
TMEM71	11.7	3.2	-1.87144	0.042339	0.375195	0.425742
DDX11	116.28	162.37	0.481732	0.0424019	0.375547	0.425336
CNEP1R1	330.52	422.76	0.355086	0.0424749	0.375796	0.425048
CTAGE15	4.5	14.18	1.65574	0.0424768	0.375796	0.425048
RPL21	1484.91	1943.8	0.388507	0.0425012	0.375805	0.425038
DIMT1	244.01	339.35	0.475834	0.0425253	0.375812	0.42503
POLD2	792.71	1033.83	0.38313	0.0425576	0.37589	0.424939
CLIC2	876.2	1159.97	0.404752	0.042631	0.375908	0.424918
COG2	199.33	272.78	0.4526	0.042654	0.375908	0.424918
DLX5	11.35	28.49	1.32746	0.0426833	0.375908	0.424918
ZNF277	182.64	248.92	0.446647	0.0426903	0.375908	0.424918
ATP6V0E2	134.69	79.64	-0.758166	0.042696	0.375908	0.424918
KRT81	12.07	40.22	1.73583	0.0426998	0.375908	0.424918
TMX4	973.09	719.8	-0.434975	0.0427938	0.37653	0.424201
ZNF684	10.43	24.53	1.2343	0.042892	0.377187	0.423443
KCTD6	103.43	68.51	-0.594142	0.0429157	0.377189	0.423441
NYAP1	139.12	213.63	0.618786	0.0429693	0.377454	0.423136
ACTC1	120.57	50.18	-1.26458	0.0430197	0.37769	0.422864
LYRM4	387.08	537.21	0.472846	0.0430535	0.377758	0.422786
OSBPL9	935.29	720.31	-0.376793	0.0430744	0.377758	0.422786
SPPL2A	2963.38	3575.15	0.270763	0.0431528	0.37824	0.422233
TDP2	1240.5	1755.25	0.500761	0.0431986	0.378405	0.422044
PMEPA1	3305.86	4003.35	0.276181	0.0432187	0.378405	0.422044
KDM1A	1033.5	1268.99	0.296145	0.043329	0.37904	0.421314
TICAM2	249.86	355.27	0.507826	0.0433399	0.37904	0.421314
MTFR1L	540.59	420.91	-0.361041	0.043362	0.37904	0.421314
JMJD7	26.36	46.47	0.817874	0.0434161	0.379136	0.421204
PHACTR2	526.9	389.25	-0.436825	0.0434201	0.379136	0.421204
THAP8	96.47	65.84	-0.55114	0.0434795	0.379449	0.420847
TMEM41A	350.86	272.67	-0.363744	0.0435862	0.37993	0.420296
COG4	701.79	853.46	0.282292	0.0435992	0.37993	0.420296
SIPA1	590.14	437.67	-0.431201	0.0436055	0.37993	0.420296
ESYT2	1815.9	1375.16	-0.401088	0.0436763	0.380237	0.419946
ZNF704	29.34	8.08	-1.85954	0.043688	0.380237	0.419946
SMAD1	260.12	338.12	0.378394	0.0437642	0.380694	0.419424
DISP2	19.42	7.02	-1.46717	0.0438284	0.380924	0.419161
DTX2	961.05	1319.11	0.456881	0.0438589	0.380924	0.419161
IGFBP2	28.75	5.97	-2.26799	0.0438678	0.380924	0.419161
EOMES	4.79	0.34	-3.81611	0.0438854	0.380924	0.419161
ZBTB21	727.87	513.68	-0.502809	0.0439695	0.381417	0.418599
ALYREF	400.8	499.47	0.317517	0.0439896	0.381417	0.418599
TRO	197.46	142.76	-0.467998	0.0440422	0.381522	0.41848
SNRNP40	374.3	487.02	0.379797	0.0440492	0.381522	0.41848
CACNA1C	420.57	286.26	-0.555034	0.0441025	0.381662	0.418321
RNF227	47.21	24.85	-0.92587	0.0441128	0.381662	0.418321
DPH5	172.15	239.79	0.478088	0.0441952	0.382169	0.417744
FSTL3	7526.41	5043.06	-0.577663	0.0443656	0.383437	0.416306
TPM3	3437.15	4602.15	0.421094	0.0444388	0.383863	0.415824
RWDD2B	344.2	252.04	-0.449567	0.0445531	0.38417	0.415477
TMBIM1	8924.06	6911.74	-0.368652	0.044591	0.38417	0.415477
DDX39A	358.04	521.88	0.543582	0.0445984	0.38417	0.415477
NSMAF	620.82	493.23	-0.331905	0.0445984	0.38417	0.415477
EED	254.1	343.23	0.433822	0.0446172	0.38417	0.415477
PPIL1	304.2	404.27	0.410282	0.0446176	0.38417	0.415477
CDO1	80.53	31.35	-1.36112	0.0446452	0.384202	0.41544
PCLAF	23.26	49.99	1.10371	0.0447178	0.384541	0.415057
PPIP5K1	120.33	174.91	0.539652	0.044742	0.384541	0.415057
DUSP16	479.54	639.65	0.41563	0.0447563	0.384541	0.415057
LRRC4C	4.48	16.02	1.83756	0.0448111	0.384806	0.414758
MAD2L1	60.35	95.63	0.66428	0.0448617	0.385035	0.4145
XG	413.59	281.99	-0.552546	0.0449314	0.385416	0.41407
CREB3L1	2021.79	1474.55	-0.455363	0.0449713	0.385416	0.41407
MYLK4	18.05	7.38	-1.29008	0.044978	0.385416	0.41407
GNG2	67.09	157.51	1.23126	0.0451391	0.386591	0.412748
SGTB	327.77	198.29	-0.725052	0.0452706	0.387511	0.411716
APLP1	144.4	80.49	-0.843101	0.0453122	0.38766	0.411548
UQCRC1	1439.54	1727.75	0.263294	0.0454003	0.388207	0.410936
KCNMB4	11.85	3.54	-1.74418	0.0454966	0.38874	0.410341
PCDHGA12	579.31	413.86	-0.485201	0.0455217	0.38874	0.410341
CD226	29	14.9	-0.961389	0.0455366	0.38874	0.410341
OPRL1	23.88	9.88	-1.27264	0.0455816	0.38874	0.410341
LRATD1	34.16	11.37	-1.5867	0.0455891	0.38874	0.410341
RIN3	285.2	212.67	-0.423385	0.0456354	0.38874	0.410341
H2AZ2	689.56	831.6	0.270219	0.0456418	0.38874	0.410341
CD300E	121.63	249.52	1.03673	0.0456559	0.38874	0.410341
MRPL42	551.16	681.12	0.305439	0.0458448	0.389994	0.408942
TSPYL4	404.96	315.97	-0.357996	0.0458517	0.389994	0.408942
MYO9B	3510.5	2924.01	-0.263728	0.0459436	0.390569	0.408302
BBLN	226.15	158.53	-0.512564	0.0459945	0.390795	0.408051
ZNF668	434.12	332.93	-0.38288	0.0460874	0.391248	0.407548
HTR2A	110.24	51.42	-1.10026	0.0460964	0.391248	0.407548
EDC3	757.98	619.57	-0.290885	0.0461832	0.391634	0.40712
KANK2	3010.09	2310.07	-0.381874	0.0461906	0.391634	0.40712
RPS20	3623.67	4677.83	0.368388	0.046264	0.391973	0.406743
RITA1	200.27	145.34	-0.462532	0.0462794	0.391973	0.406743
KCNQ3	125.72	79.11	-0.668391	0.0463622	0.392056	0.406652
FANCA	38.09	73.56	0.949412	0.0463625	0.392056	0.406652
MTO1	198.78	260.9	0.392341	0.0463654	0.392056	0.406652
PRPF19	976.59	1213.77	0.313674	0.0463866	0.392056	0.406652
PIGP	258.09	173.25	-0.575047	0.0464373	0.392095	0.406609
DDX58	3700.66	4725.84	0.352788	0.0464608	0.392095	0.406609
CD163L1	35.9	16.84	-1.09218	0.0464643	0.392095	0.406609
EIF1AD	321.06	405.04	0.335206	0.046562	0.392189	0.406504
ITGB1	49122.6	36752.3	-0.418552	0.0466161	0.392189	0.406504
IGSF11	13.9	29.75	1.09841	0.0466318	0.392189	0.406504
ADGRG6	15.77	3.17	-2.31318	0.0466357	0.392189	0.406504
KCNG1	111.51	43.22	-1.3676	0.046641	0.392189	0.406504
GJB2	40.47	87.62	1.11437	0.0466414	0.392189	0.406504
NCKIPSD	384.19	282.39	-0.444152	0.0466462	0.392189	0.406504
MPZL1	7936.88	9582.1	0.27177	0.0466852	0.392312	0.406368
TBC1D15	511.91	636.31	0.313848	0.0467606	0.392494	0.406167
EPDR1	1665.63	1360	-0.292459	0.0467843	0.392494	0.406167
HOXA9	224.06	310.72	0.471749	0.0467874	0.392494	0.406167
TSPAN4	2415.2	2023.17	-0.255523	0.0468045	0.392494	0.406167
CCR7	41.02	18.49	-1.1498	0.0469787	0.393749	0.40478
MRPS7	644.01	835.64	0.375812	0.0470329	0.393999	0.404505
MRPL3	746.76	959.04	0.360943	0.0470738	0.394136	0.404354
C15orf48	22426.9	15379.5	-0.54422	0.0471573	0.394257	0.404221
EHD4	529.06	758.41	0.519544	0.0471924	0.394257	0.404221
NLGN1	7.59	1.25	-2.60391	0.0472022	0.394257	0.404221
RNF169	255.65	175.96	-0.538876	0.0472042	0.394257	0.404221
ERFE	96.53	164.26	0.766977	0.0472108	0.394257	0.404221
R3HCC1L	216.75	281.29	0.376048	0.0472735	0.394576	0.40387
TMEM45A	1925.92	1184.71	-0.701012	0.0473145	0.394713	0.403719
VIPAS39	375.14	469.47	0.323618	0.047365	0.39493	0.40348
SF3B3	2078.75	2513.36	0.273897	0.0475293	0.396094	0.402201
CHMP5	2353.94	2911.13	0.306499	0.0475584	0.396131	0.402161
ALOX15B	7.35	0.66	-3.47478	0.0475994	0.396267	0.402012
COL4A2	15083.2	10421.5	-0.533385	0.0476735	0.396679	0.401561
HAUS3	109.49	158.07	0.529795	0.0477575	0.397036	0.40117
INSR	266.58	190.78	-0.482638	0.0477782	0.397036	0.40117
PI15	2.78	13.8	2.31218	0.0477905	0.397036	0.40117
AASDHPPT	588.88	708.62	0.267041	0.0478293	0.397154	0.401041
MERTK	10.42	1.92	-2.43859	0.0478726	0.397308	0.400873
LAMA2	149.71	97.2	-0.623214	0.0479189	0.397443	0.400725
CACNA1A	313.69	213.74	-0.553494	0.0479383	0.397443	0.400725
RPS3	3741.41	4706.6	0.331101	0.0479998	0.397748	0.400392
NUDT16L1	299.47	396.01	0.403121	0.0480978	0.398355	0.39973
TPM4	32280.8	27719.6	-0.21977	0.0481737	0.398582	0.399483
KCNS1	6.19	0.94	-2.71707	0.0481748	0.398582	0.399483
MAPKAPK3	448.37	324.6	-0.466026	0.0482055	0.398631	0.399429
NAP1L1	1750.93	2327.41	0.410604	0.0483546	0.399659	0.398311
CTSO	1560.79	1178.04	-0.405887	0.0485065	0.40051	0.397386
RPS9	2626.27	3219.86	0.293983	0.0485075	0.40051	0.397386
PMF1	237.54	323.21	0.444348	0.048594	0.400906	0.396957
MARK3	1073.74	1329.8	0.308563	0.0486053	0.400906	0.396957
SCARF2	169.63	117.62	-0.528238	0.0488365	0.402432	0.395307
TLCD1	195.87	317.85	0.698474	0.0489011	0.402432	0.395307
FOXL1	130.76	201.39	0.623096	0.0489047	0.402432	0.395307
ELF2	255.21	321.07	0.33118	0.0489061	0.402432	0.395307
INHBB	4.11	0.34	-3.59704	0.048917	0.402432	0.395307
SNRPA1	273.84	367.63	0.424921	0.0489404	0.402432	0.395307
KIF13A	1087.2	866.49	-0.327353	0.0490549	0.402991	0.394705
PRDM8	359.1	508.97	0.503223	0.0490585	0.402991	0.394705
RNF10	2561.02	2102.53	-0.284592	0.049156	0.403586	0.394064
COL4A4	17.37	6.62	-1.39183	0.0491904	0.403662	0.393982
MRPS23	396.6	491.47	0.30942	0.0492536	0.403975	0.393646
RANBP6	330.25	433.33	0.391886	0.0493107	0.404201	0.393402
RHOBTB2	272.15	211.62	-0.362916	0.0493315	0.404201	0.393402
MMP24OS	845.55	517.53	-0.708244	0.0493844	0.404429	0.393158
DNASE1	81.07	114.38	0.496623	0.0494412	0.40459	0.392985
ZNF394	269.65	204.7	-0.397533	0.0494544	0.40459	0.392985
GEMIN4	209.24	269.9	0.367238	0.0496316	0.405716	0.391778
MCM4	415.28	568.6	0.453317	0.0496604	0.405716	0.391778
SRD5A3	379.98	294.5	-0.367669	0.0496677	0.405716	0.391778
CASC3	1537.91	1290.59	-0.252945	0.0497121	0.405873	0.39161
NUDT12	130.44	179.85	0.463444	0.0497515	0.405988	0.391487
NCEH1	990.47	720.93	-0.458257	0.0497868	0.40607	0.391399
LMNB1	42.41	92.58	1.12621	0.0498256	0.406181	0.391281
PCGF5	1093.84	1309.9	0.260057	0.0499398	0.406906	0.390506
KRT19	6.62	0.95	-2.80223	0.0500511	0.407493	0.38988
CSRNP1	1520.49	1903.04	0.323772	0.0500626	0.407493	0.38988
SEC16B	19.81	49.63	1.32476	0.0501319	0.407686	0.389674
RBM22	645.44	773.09	0.260356	0.0501485	0.407686	0.389674
NPTX1	160.73	62.58	-1.36086	0.0501739	0.407686	0.389674
SEMA4C	1421.39	1772.86	0.318776	0.0501876	0.407686	0.389674
IL4R	2026.06	1660.38	-0.287165	0.050224	0.407775	0.389579
LRP5	621.24	434.23	-0.516683	0.0503837	0.408555	0.38875
PGRMC2	2228.75	1675.61	-0.411548	0.0503921	0.408555	0.38875
CCBE1	922.78	594.28	-0.63483	0.0503962	0.408555	0.38875
CDC42EP4	723.94	1032.57	0.512306	0.0504464	0.408693	0.388603
C3orf62	56.74	83.92	0.564688	0.0504863	0.408693	0.388603
APEH	842.14	1061.94	0.334573	0.0504895	0.408693	0.388603
PCDH19	11.3	2.53	-2.15695	0.0505932	0.409327	0.38793
GALNT7	530.73	688.4	0.375273	0.050728	0.409884	0.387339
C1orf52	382.9	474.85	0.310493	0.0507704	0.409884	0.387339
STARD10	276.35	457.61	0.72762	0.0508008	0.409884	0.387339
STAT5B	479.41	357.93	-0.421554	0.0508031	0.409884	0.387339
SLC25A11	827.72	624.68	-0.406026	0.050804	0.409884	0.387339
FADS3	1896.51	1553.44	-0.287882	0.050815	0.409884	0.387339
IER3	21224.4	14955.3	-0.505069	0.0508818	0.410198	0.387006
RHOB	2722.7	1953.9	-0.47868	0.050905	0.410198	0.387006
STEAP2	1472.92	1045.07	-0.495069	0.0510472	0.410772	0.386399
PGK1	18378.5	13340.9	-0.462167	0.0510479	0.410772	0.386399
TMEM178A	15.33	5.44	-1.49624	0.051089	0.410772	0.386399
[truncated: 14,085 more rows]

## Sheet: KEGG DOWN
Category	Term	Genes	Count	List Total	Pop Hits	Pop Total	P-Value	-log10(p)	Benjamini	Fold Enrichment	Bonferroni	FDR	Fisher Exact
KEGG_PATHWAY	Hippo signaling pathway - multiple species	0.028	4	78	29	9496	0.00161	2.79317	0.25	16.79	0.255	0.25	8.56e-05
KEGG_PATHWAY	Cytoskeleton in muscle cells	0.0559	8	78	233	9496	0.00274	2.56225	0.25	4.18	0.394	0.25	0.000622
KEGG_PATHWAY	Apelin signaling pathway	0.035	5	78	140	9496	0.0268	1.57187	1	4.35	0.993	1	0.00578
KEGG_PATHWAY	MAPK signaling pathway	0.049	7	78	300	9496	0.0345	1.46218	1	2.84	0.998	1	0.0114
KEGG_PATHWAY	Hippo signaling pathway	0.035	5	78	157	9496	0.0384	1.41567	1	3.88	0.999	1	0.00929
KEGG_PATHWAY	Adherens junction	0.028	4	78	93	9496	0.0396	1.4023	1	5.24	0.999	1	0.00708
KEGG_PATHWAY	Cell adhesion molecules	0.035	5	78	160	9496	0.0407	1.39041	1	3.8	1	1	0.01
KEGG_PATHWAY	Long-term depression	0.021	3	78	60	9496	0.085	1.07058	1	6.09	1	1	0.013
KEGG_PATHWAY	FoxO signaling pathway	0.028	4	78	133	9496	0.0932	1.03058	1	3.66	1	1	0.0237
KEGG_PATHWAY	Glycerolipid metabolism	0.021	3	78	65	9496	0.0974	1.01144	1	5.62	1	1	0.0162

## Sheet: KEGG UP
Category	Term	Genes	Count	List Total	Pop Hits	Pop Total	P-Value	-log10(p)	Benjamini	Fold Enrichment	Bonferroni	FDR	Fisher Exact
KEGG_PATHWAY	Efferocytosis	0.0652	3	21	157	9496	0.0425	1.37161	1	8.64	0.977	1	0.00474
KEGG_PATHWAY	Cell cycle	0.0652	3	21	158	9496	0.043	1.36653	1	8.59	0.978	1	0.00482
KEGG_PATHWAY	Pathways in cancer	0.087	4	21	533	9496	0.0986	1.00612	1	3.39	1	1	0.0274
