# Supplementary material
Source: Research Square preprint supplement (doi:10.21203/rs.3.rs-9652440/v1)
Supplement: Supplementary file 4 [file 92614104200d6b5ae3b15f5a.xlsx]

## Sheet: siTEAD4 vs siCtrl 4mix RNA-seq
Gene ID	Gene Symbol	siCtrl_4mix Average Read Count	siTEAD4_4mix Average Read Count	log2 (siTEAD4_4mix / siCtrl_4mix)	Pvalue(siTEAD4_4mix / siCtrl_4mix)	Qvalue (siTEAD4_4mix / siCtrl_4mix)	-log10 (q)
83953	FCAMR	26.67	0.18	-7.21089	5.42272e-06	0.000251387	3.59966
30009	TBX21	16.99	0.18	-6.56678	1.19016e-05	0.000478995	3.31967
140767	NRSN1	16.2	0.18	-6.49989	1.12228e-05	0.000455071	3.34192
100526740	ATP5MF-PTCD1	14.74	0.18	-6.36369	0.103868	0.330088	0.48137
222553	SLC35F1	265.89	5.97	-5.47631	1.0472e-18	8.91718e-16	15.0498
1591	CYP24A1	70.35	1.64	-5.42451	1.35254e-09	1.80849e-07	6.74268
8320	EOMES	13.59	0.35	-5.26796	0.00254702	0.0286367	1.54308
152330	CNTN4	6.26	0.18	-5.15085	0.00493051	0.0457663	1.33945
5458	POU4F2	5.97	0.18	-5.08176	0.00836059	0.0653775	1.18457
114108587	ATF7-NPFF	5.37	0.18	-4.93484	0.0827679	0.286868	0.542317
375057	STUM	19.7	0.65	-4.92849	0.00151345	0.0193413	1.71351
100529257	SYNJ2BP-COX16	5.25	0.18	-4.9031	0.00994259	0.0730191	1.13656
55959	SULF2	487.98	16.73	-4.86643	2.74294e-26	6.33972e-23	22.1979
56670	SUCNR1	9.73	0.35	-4.78776	0.00207221	0.0244379	1.61194
27233	SULT1C4	4.53	0.17	-4.69851	0.0246983	0.132711	0.877091
10319	LAMC3	8.85	0.35	-4.64848	0.00490409	0.0455996	1.34104
150221	RIMBP3C	4.25	0.17	-4.60909	0.0590645	0.230236	0.637828
963	CD53	8.39	0.35	-4.57617	0.00555034	0.049476	1.30561
9729	KIAA0408	44.59	1.97	-4.50012	1.77328e-05	0.000659539	3.18076
51179	HAO2	3.88	0.17	-4.48251	0.0430317	0.189033	0.723461
26206	SPAG8	3.87	0.17	-4.48139	0.0276909	0.142136	0.847297
8128	ST8SIA2	3.84	0.17	-4.47088	0.0720213	0.26107	0.583244
11249	NXPH2	21.22	1	-4.41239	0.000155872	0.00358727	2.44524
53632	PRKAG3	7.47	0.35	-4.40691	0.0313781	0.1544	0.811353
399694	SHC4	7.47	0.35	-4.40393	0.00799824	0.0635265	1.19705
3061	HCRTR1	3.59	0.17	-4.37499	0.051727	0.212571	0.672496
7004	TEAD4	176.7	8.54	-4.37105	3.8324e-26	7.75055e-23	22.1107
342346	C16orf96	3.53	0.17	-4.35262	0.0380394	0.17504	0.756864
5222	PGA5	3.47	0.17	-4.32983	0.090651	0.30305	0.518485
80243	PREX2	7	0.35	-4.31352	0.0317206	0.15547	0.808352
51760	SYT17	32.52	1.65	-4.29778	1.11307e-06	6.40867e-05	4.19323
6331	SCN5A	12.81	0.65	-4.29716	0.0056478	0.0500854	1.30029
1137	CHRNA4	3.28	0.17	-4.24956	0.1094	0.341433	0.466694
54753	ZNF853	12.33	0.66	-4.23357	0.00220892	0.0256739	1.59051
80000	GREB1L	3.18	0.17	-4.21004	0.110256	0.342716	0.465066
5148	PDE6G	3.18	0.17	-4.20909	0.0550131	0.220078	0.657423
4703	NEB	12.14	0.66	-4.20129	0.00185774	0.0224637	1.64852
2829	XCR1	6.43	0.35	-4.19481	0.0177124	0.106698	0.971842
1949	EFNB3	6.38	0.35	-4.18075	0.0153944	0.0977493	1.00989
3484	IGFBP1	35.11	1.98	-4.15214	4.40384e-06	0.000212053	3.67356
3362	HTR6	6.13	0.35	-4.11897	0.0191494	0.112335	0.949486
6318	SERPINB4	301.23	17.63	-4.09459	0.0256322	0.135482	0.868118
375593	TRIM73	2.91	0.17	-4.08685	0.128202	0.376251	0.424522
27123	DKK2	2.9	0.17	-4.08357	0.130621	0.380641	0.419485
2978	GUCA1A	10.9	0.67	-4.0335	0.00549301	0.0491731	1.30827
5502	PPP1R1A	32.63	2	-4.02973	0.000210123	0.00447903	2.34882
51268	PIPOX	5.73	0.35	-4.029	0.0205644	0.11767	0.929334
222865	TMEM130	9.98	0.65	-3.94809	0.00898108	0.0683787	1.16508
6658	SOX3	5.41	0.35	-3.94574	0.038954	0.177282	0.751335
2307	FOXS1	5.34	0.35	-3.93028	0.0255068	0.135126	0.869261
127733	UBXN10	2.54	0.17	-3.90441	0.106447	0.335421	0.47441
644186	SYCE3	2.54	0.17	-3.90172	0.0948058	0.311888	0.506002
80303	EFHD1	9.87	0.66	-3.89951	0.00708734	0.0586655	1.23162
11280	SCN11A	5.05	0.35	-3.84202	0.0360499	0.16896	0.772216
9173	IL1RL1	199.69	14.1	-3.82406	6.8091e-11	1.25187e-08	7.90244
10218	ANGPTL7	4.94	0.35	-3.81427	0.0748537	0.267511	0.572658
29951	PDZRN4	23.04	1.66	-3.79818	0.000895218	0.0132611	1.87742
1880	GPR183	4.8	0.35	-3.76596	0.0799457	0.280228	0.552489
942	CD86	2.25	0.17	-3.7365	0.211189	0.50725	0.294778
10716	TBR1	2.24	0.17	-3.72793	0.199426	0.491815	0.308198
1824	DSC2	104.18	7.88	-3.72435	0.0113645	0.0794923	1.09967
3684	ITGAM	2.23	0.17	-3.72423	0.146155	0.40746	0.389915
8839	CCN5	6724.27	508.96	-3.72376	3.54189e-39	2.86521e-35	34.5428
254528	MEIOB	2.21	0.17	-3.71592	0.135117	0.388161	0.410988
777	CACNA1E	2.21	0.17	-3.71532	0.215567	0.512842	0.290017
5697	PYY	2.21	0.17	-3.71186	0.138316	0.393636	0.404905
1310	COL19A1	2.2	0.17	-3.70779	0.148962	0.411974	0.38513
1235	CCR6	2.19	0.17	-3.70179	0.13746	0.39234	0.406337
9001	HAP1	8.55	0.66	-3.69063	0.0150734	0.0965067	1.01544
2254	FGF9	2.13	0.17	-3.67055	0.224979	0.524435	0.280308
84620	ST6GAL2	49.94	3.95	-3.66115	3.39473e-05	0.00109627	2.96008
5155	PDGFB	20.79	1.65	-3.65837	0.000597704	0.00989791	2.00446
140738	TMEM37	4.37	0.35	-3.63557	0.048423	0.203373	0.691706
9547	CXCL14	4.35	0.35	-3.63241	0.0619574	0.237189	0.624906
27164	SALL3	4.33	0.35	-3.62224	0.0536196	0.216932	0.663676
8817	FGF18	44.46	3.61	-3.62118	7.94166e-07	4.72658e-05	4.32545
10216	PRG4	1635.54	133.78	-3.61184	0.000267069	0.00538405	2.26889
2321	FLT1	4.09	0.35	-3.53706	0.0724136	0.261579	0.582397
6337	SCNN1A	4.02	0.35	-3.52188	0.0621048	0.237431	0.624462
27032	ATP2C1	3253.29	283.4	-3.52101	2.12289e-34	1.14487e-30	29.9412
28513	CDH19	1.89	0.17	-3.50482	0.262631	0.57081	0.243508
8581	LY6D	1.89	0.17	-3.50482	0.262631	0.57081	0.243508
7094	TLN1	13075.3	1153.53	-3.50272	1.3666e-27	5.52754e-24	23.2575
53405	CLIC5	1.89	0.17	-3.49918	0.189726	0.477532	0.320997
128312	H2BU1	1.88	0.17	-3.49434	0.181551	0.464538	0.332979
2894	GRID1	1.88	0.17	-3.49434	0.181551	0.464538	0.332979
29942	PURG	3.94	0.35	-3.49158	0.0874147	0.296898	0.527393
6540	SLC6A13	1.86	0.17	-3.48138	0.177223	0.458546	0.338617
100310812	SPDYE2B	1.85	0.17	-3.47661	0.185107	0.470097	0.327813
10205	MPZL2	1.84	0.17	-3.47312	0.185806	0.471259	0.32674
1674	DES	22	1.99	-3.46405	0.00036196	0.00685731	2.16385
1600	DAB1	50.58	4.58	-3.46369	2.37792e-05	0.000831619	3.08008
5042	PABPC3	1.82	0.17	-3.45986	0.197728	0.489226	0.31049
6530	SLC6A2	10.88	0.99	-3.45706	0.00701076	0.0582873	1.23443
57823	SLAMF7	496.19	46.65	-3.41091	0.000707622	0.011126	1.95366
9890	PLPPR4	273.54	25.75	-3.40908	0.00074681	0.0116179	1.93487
1233	CCR4	3.7	0.35	-3.39595	0.0811042	0.283226	0.547867
4137	MAPT	3.7	0.35	-3.39462	0.0997848	0.32269	0.491214
2675	GFRA2	6.79	0.65	-3.37942	0.0289122	0.146111	0.835318
1618	DAZL	30.85	2.97	-3.37474	3.39326e-05	0.00109627	2.96008
47	ACLY	8563.56	838.77	-3.35186	3.5515e-20	3.83065e-17	16.4167
57124	CD248	2771.54	273.42	-3.34152	9.3504e-06	0.000390905	3.40793
8761	PABPC4	1269.01	126.29	-3.32887	4.09361e-57	6.62306e-53	52.1789
2824	GPM6B	86.11	8.72	-3.30332	0.000111303	0.00276191	2.55879
1364	CLDN4	1070.53	109.02	-3.29568	6.65058e-05	0.00186159	2.73012
1588	CYP19A1	6.48	0.66	-3.29003	0.0382931	0.175578	0.755531
1901	S1PR1	9.51	0.97	-3.2882	0.0225149	0.125265	0.902172
4647	MYO7A	3.37	0.35	-3.26897	0.160552	0.431131	0.365391
286749	STON1-GTF2A1L	1.57	0.16	-3.25602	0.410749	0.725036	0.139641
55806	HR	22.28	2.33	-3.25512	0.00228162	0.0262548	1.58079
407738	TAFA1	3.34	0.35	-3.25034	0.112181	0.345973	0.460958
2277	VEGFD	1.55	0.16	-3.24319	0.319011	0.636332	0.196316
5132	PDC	1.55	0.16	-3.23901	0.327579	0.64431	0.190905
242	ALOX12B	1.55	0.16	-3.23732	0.320499	0.637797	0.195317
338	APOB	1.54	0.16	-3.2325	0.250204	0.555488	0.255325
7288	TULP2	1.54	0.16	-3.2325	0.250204	0.555488	0.255325
79025	FNDC11	1.54	0.16	-3.2325	0.250204	0.555488	0.255325
1731	SEPTIN1	1.53	0.16	-3.22574	0.415242	0.728616	0.137501
869	CBLN1	1.53	0.16	-3.22574	0.415242	0.728616	0.137501
50511	SYCP3	1.53	0.16	-3.22287	0.324167	0.641553	0.192768
56124	PCDHB12	1.53	0.16	-3.22287	0.324167	0.641553	0.192768
204962	SLC44A5	9.25	0.99	-3.21959	0.0290881	0.146747	0.833432
116842	LEAP2	1.52	0.16	-3.21696	0.247188	0.552163	0.257933
28954	REM1	1.52	0.16	-3.21696	0.247188	0.552163	0.257933
140894	CNBD2	1.51	0.16	-3.21125	0.248543	0.553534	0.256856
23779	ARHGAP8	1.51	0.16	-3.21125	0.248543	0.553534	0.256856
256158	HMCN2	1.51	0.16	-3.21125	0.248543	0.553534	0.256856
9254	CACNA2D2	1.51	0.16	-3.21125	0.248543	0.553534	0.256856
10786	SLC17A3	1.51	0.16	-3.20663	0.328319	0.645272	0.190257
125	ADH1B	1.51	0.16	-3.20663	0.328319	0.645272	0.190257
150084	IGSF5	1.51	0.16	-3.20663	0.328319	0.645272	0.190257
57338	JPH3	1.51	0.16	-3.20663	0.328319	0.645272	0.190257
30812	SOX8	1.51	0.16	-3.20498	0.32875	0.645413	0.190162
6779	STATH	1.51	0.16	-3.20498	0.32875	0.645413	0.190162
327657	SERPINA9	2439.36	266.7	-3.19322	1.95623e-13	6.08652e-11	10.2156
284111	SLC13A5	1.49	0.16	-3.19013	0.340138	0.656928	0.182482
4360	MRC1	1.49	0.16	-3.19013	0.340138	0.656928	0.182482
9077	DIRAS3	96.7	10.63	-3.18568	4.96841e-07	3.16472e-05	4.49966
222611	ADGRF2	1.48	0.16	-3.18404	0.341688	0.658467	0.181466
26047	CNTNAP2	1.47	0.16	-3.17226	0.42325	0.734029	0.134287
346389	MACC1	17.58	1.96	-3.16682	0.00200641	0.0237815	1.62376
3752	KCND3	240.92	27.54	-3.12876	3.06969e-12	7.88327e-10	9.10329
225689	MAPK15	3.08	0.35	-3.12788	0.152422	0.417617	0.379222
653641	GOLGA6C	5.73	0.66	-3.12465	0.1207	0.363312	0.43972
57687	VAT1L	3.05	0.35	-3.12454	0.141553	0.399457	0.39853
1365	CLDN3	8.54	0.98	-3.12244	0.0284457	0.144588	0.839869
340547	VSIG1	5.81	0.67	-3.11804	0.0675295	0.250365	0.601427
26219	OR1J4	3.03	0.35	-3.11595	0.130952	0.381193	0.418855
135138	PACRG	3.02	0.35	-3.11284	0.126863	0.373985	0.427146
2153	F5	3.03	0.35	-3.11071	0.138073	0.393288	0.405289
66000	TMEM108	3.04	0.35	-3.11071	0.137759	0.392809	0.405818
118932	ANKRD22	11.53	1.34	-3.10567	0.0166685	0.102906	0.987559
8875	VNN2	11.4	1.32	-3.10463	0.0135124	0.0895856	1.04776
80731	THSD7B	3	0.35	-3.10453	0.125098	0.370428	0.431296
7062	TCHH	3.02	0.35	-3.10148	0.127915	0.375665	0.425199
203190	LGI3	3.01	0.35	-3.09924	0.128243	0.376286	0.424482
7056	THBD	642.77	75.9	-3.08214	0.00468675	0.044114	1.35542
2814	GP5	5.44	0.66	-3.04988	0.078875	0.27778	0.5563
9241	NOG	8.15	0.99	-3.04761	0.0234689	0.128553	0.890918
113177	IZUMO4	5.41	0.66	-3.04151	0.062094	0.237431	0.624462
115704	EVI5L	258.48	31.5	-3.03649	4.13251e-24	7.42888e-21	20.1291
5731	PTGER1	8.11	0.99	-3.03175	0.0433337	0.189742	0.721837
286133	SCARA5	206.59	25.29	-3.03016	0.0107856	0.0773554	1.11151
7087	ICAM5	5.41	0.67	-3.01772	0.0746503	0.267085	0.57335
79057	PRRG3	2.75	0.35	-2.96323	0.227247	0.527395	0.277864
644943	RASSF10	2.71	0.35	-2.95262	0.173293	0.452064	0.3448
5745	PTH1R	2.71	0.35	-2.94889	0.230711	0.531196	0.274745
728441	GGT2	2.69	0.35	-2.94309	0.162784	0.435104	0.361406
26279	PLA2G2D	2.7	0.35	-2.93888	0.187332	0.473874	0.324337
347454	SOWAHD	2.67	0.35	-2.93722	0.171446	0.448984	0.347769
200132	DYNLT5	2.68	0.35	-2.93721	0.171054	0.448394	0.34834
440738	MAP1LC3C	2.68	0.35	-2.93627	0.163985	0.436376	0.360139
100130519	TMEM221	2.69	0.35	-2.93627	0.163596	0.435907	0.360606
478	ATP1A3	2.69	0.35	-2.93627	0.163596	0.435907	0.360606
353500	BMP8A	5.07	0.66	-2.93561	0.0649094	0.244169	0.61231
2662	GDF10	5.01	0.66	-2.93418	0.121827	0.365412	0.437217
100528017	SAA2-SAA4	1.23	0.16	-2.93358	0.460073	0.76336	0.117271
284451	ODF3L2	1.23	0.16	-2.93358	0.460073	0.76336	0.117271
340307	CTAGE6	1.23	0.16	-2.93358	0.460073	0.76336	0.117271
360200	TMPRSS9	2.68	0.35	-2.93283	0.176111	0.456545	0.340516
1050	CEBPA	5.05	0.66	-2.93163	0.0694337	0.255195	0.593128
146395	GSG1L	1.22	0.16	-2.92558	0.410142	0.724757	0.139808
170392	OIT3	1.22	0.16	-2.92558	0.410142	0.724757	0.139808
105376722	LOC105376722	1.21	0.16	-2.91824	0.40717	0.722479	0.141175
2134	EXTL1	1.21	0.16	-2.91824	0.40717	0.722479	0.141175
2779	GNAT1	1.21	0.16	-2.91824	0.40717	0.722479	0.141175
285051	STPG4	1.21	0.16	-2.91298	0.413515	0.727043	0.13844
3270	HRC	1.21	0.16	-2.91298	0.413515	0.727043	0.13844
5153	PDE1B	1.21	0.16	-2.91298	0.413515	0.727043	0.13844
94137	RP1L1	1.21	0.16	-2.91298	0.413515	0.727043	0.13844
23349	PHF24	1.2	0.16	-2.91096	0.414019	0.727157	0.138372
51473	DCDC2	1.2	0.16	-2.91096	0.414019	0.727157	0.138372
1187	CLCNKA	1.2	0.16	-2.90521	0.33559	0.652586	0.185362
55911	APOBR	1.2	0.16	-2.90521	0.33559	0.652586	0.185362
1118	CHIT1	1.2	0.16	-2.90372	0.464803	0.767659	0.114832
107181291	PYDC5	1.19	0.16	-2.89814	0.337477	0.654073	0.184374
25833	POU2F3	1.19	0.16	-2.89814	0.337477	0.654073	0.184374
84966	IGSF21	1.19	0.16	-2.89814	0.337477	0.654073	0.184374
105180390	SPDYE13	1.19	0.16	-2.89286	0.414029	0.727157	0.138372
124535	HSF5	1.19	0.16	-2.89286	0.414029	0.727157	0.138372
2571	GAD1	1.19	0.16	-2.89286	0.414029	0.727157	0.138372
776	CACNA1D	1.19	0.16	-2.89286	0.414029	0.727157	0.138372
83882	TSPAN10	21.88	2.95	-2.88897	0.000531142	0.00911278	2.04035
100533952	RBAK-RBAKDN	1.18	0.16	-2.88583	0.34076	0.657502	0.182103
5522	PPP2R2C	1.18	0.16	-2.88583	0.34076	0.657502	0.182103
7069	THRSP	1.18	0.16	-2.88583	0.34076	0.657502	0.182103
25837	RAB26	1.17	0.16	-2.87794	0.418083	0.730397	0.136441
3780	KCNN1	1.17	0.16	-2.87794	0.418083	0.730397	0.136441
57586	SYT13	1.17	0.16	-2.87245	0.424266	0.734316	0.134117
94122	SYTL5	1.17	0.16	-2.87245	0.424266	0.734316	0.134117
4319	MMP10	887.16	121.32	-2.87042	1.81074e-10	3.011e-08	7.52129
54626	HES2	1.16	0.16	-2.8649	0.426305	0.735702	0.133298
23544	SEZ6L	1.15	0.16	-2.85099	0.47322	0.77281	0.111927
51704	GPRC5B	81.53	11.36	-2.84387	0.000887985	0.0132168	1.87887
7481	WNT11	21.02	2.96	-2.82927	0.000578757	0.00965237	2.01537
57578	UNC79	18.64	2.63	-2.82321	0.000835107	0.0126391	1.89828
4582	MUC1	1368.27	193.87	-2.81918	0.00432912	0.0419379	1.37739
3748	KCNC3	101.46	14.6	-2.79728	1.95783e-05	0.000707047	3.15055
57468	SLC12A5	6.84	0.99	-2.78479	0.0590012	0.230075	0.638131
23007	PLCH1	285.91	41.59	-2.78134	9.15158e-07	5.38413e-05	4.26888
65268	WNK2	6.8	0.99	-2.77661	0.0483368	0.203334	0.69179
27254	CSDC2	15.48	2.27	-2.76838	0.00452336	0.0430745	1.36578
222967	RSPH10B	2.38	0.35	-2.76525	0.269005	0.57937	0.237044
81494	CFHR5	2.39	0.35	-2.76158	0.224881	0.524334	0.280392
158038	LINGO2	2.36	0.35	-2.76119	0.27051	0.580448	0.236237
59350	RXFP1	48.71	7.19	-2.75945	2.24896e-06	0.000116996	3.93183
388588	SMIM1	2.37	0.35	-2.75716	0.275236	0.584932	0.232895
23284	ADGRL3	2.35	0.35	-2.75531	0.276224	0.585981	0.232117
29944	PNMA3	2.35	0.35	-2.75355	0.212516	0.509225	0.29309
170689	ADAMTS15	2.37	0.35	-2.75315	0.287526	0.598932	0.222623
8456	FOXN1	2.37	0.35	-2.75073	0.215264	0.51282	0.290035
6542	SLC7A2	6345.69	943.13	-2.75025	0.000278167	0.00554927	2.25576
158297	SAXO1	2.36	0.35	-2.74968	0.215487	0.512842	0.290017
7225	TRPC6	2.36	0.35	-2.74926	0.359435	0.674863	0.170785
1825	DSC3	8.77	1.31	-2.74736	0.0408035	0.182516	0.738699
7477	WNT7B	4.46	0.66	-2.7453	0.155768	0.423283	0.373369
7447	VSNL1	2.33	0.35	-2.74411	0.274467	0.584642	0.23311
1830	DSG3	2.35	0.35	-2.7441	0.273306	0.583389	0.234042
728392	LOC728392	222.12	33.24	-2.74053	6.03301e-15	2.4402e-12	11.6126
3683	ITGAL	2.34	0.35	-2.73899	0.21772	0.515586	0.287699
414152	C10orf105	2.34	0.35	-2.73618	0.207467	0.502515	0.298851
25802	LMOD1	4.37	0.66	-2.73417	0.0984711	0.319819	0.495096
116	ADCYAP1	2.33	0.35	-2.7293	0.219754	0.517861	0.285786
5608	MAP2K6	2.33	0.35	-2.7293	0.219754	0.517861	0.285786
10149	ADGRG2	81.3	12.27	-2.72827	6.0133e-06	0.000274054	3.56216
10461	MERTK	8.78	1.33	-2.7272	0.025026	0.133806	0.873526
402665	IGLON5	26.34	3.99	-2.72111	0.00676098	0.0567649	1.24592
5744	PTHLH	1988.22	301.99	-2.7189	3.13167e-11	6.10449e-09	8.21435
9099	USP2	6.45	0.98	-2.71847	0.0579911	0.2273	0.643401
2170	FABP3	256.74	39.04	-2.71742	5.36105e-11	1.00856e-08	7.9963
159963	SLC5A12	10.77	1.64	-2.71397	0.0232531	0.128007	0.892767
400916	CHCHD10	55.43	8.48	-2.70876	3.11741e-07	2.15541e-05	4.66647
10268	RAMP3	8.42	1.3	-2.69538	0.0386088	0.176356	0.753611
4843	NOS2	486.59	75.41	-2.68984	0.0161099	0.100712	0.99692
100133941	CD24	639.63	99.18	-2.68913	0.00212868	0.0249927	1.60219
129293	TRABD2A	6.42	1	-2.68672	0.0575073	0.226322	0.645272
3751	KCND2	174.22	27.15	-2.68183	5.26052e-07	3.31167e-05	4.47995
8483	CILP	52.34	8.17	-2.6803	2.6361e-05	0.000897397	3.04702
165257	C1QL2	10.55	1.65	-2.67716	0.0160506	0.100474	0.997948
1952	CELSR2	22.9	3.61	-2.66498	0.000644412	0.0104155	1.98232
64881	PCDH20	4.1	0.66	-2.64027	0.164136	0.436545	0.359971
283987	HID1	4.07	0.66	-2.63065	0.138042	0.393269	0.40531
26049	FAM169A	4.07	0.66	-2.62989	0.118126	0.35822	0.445851
50507	NOX4	324.15	52.58	-2.62399	3.89687e-07	2.59454e-05	4.58594
2890	GRIA1	8.18	1.33	-2.62271	0.0510776	0.210974	0.675772
10446	LRRN2	4.04	0.66	-2.62159	0.119291	0.360614	0.442958
83643	CCDC3	110.6	18	-2.61942	1.05515e-06	6.11876e-05	4.21334
4481	MSR1	24.19	3.94	-2.61904	0.000307988	0.00607651	2.21635
10044	SH2D3C	4.13	0.67	-2.61637	0.224142	0.523364	0.281196
203447	NRK	831.96	136.02	-2.61265	9.75693e-08	8.30828e-06	5.08049
59353	TMEM35A	4.06	0.66	-2.61184	0.152648	0.418025	0.378798
28959	TMEM176B	6.06	0.99	-2.61158	0.102764	0.328307	0.48372
56603	CYP26B1	150.06	24.57	-2.61071	6.51543e-09	7.75097e-07	6.11064
3055	HCK	2478.38	406	-2.60985	0.00125288	0.0168394	1.77367
80237	ELL3	4	0.66	-2.60883	0.160354	0.431009	0.365514
542767	PCOTH	5.99	0.98	-2.60709	0.0662038	0.247512	0.606404
368	ABCC6	30.27	4.98	-2.60225	0.00403952	0.0400458	1.39744
57419	SLC24A3	108.32	17.89	-2.59832	0.0635636	0.241124	0.617759
6404	SELPLG	234.92	38.88	-2.59513	1.88932e-15	8.73352e-13	12.0588
1638	DCT	4.04	0.67	-2.59458	0.150466	0.414434	0.382544
646962	HRCT1	6.07	1.01	-2.593	0.0980764	0.319079	0.496102
1960	EGR3	33.4	5.56	-2.58697	0.000326205	0.00632814	2.19872
4629	MYH11	33.67	5.64	-2.57742	0.000539289	0.00921554	2.03548
130733	TMEM178A	9.75	1.65	-2.56495	0.019586	0.113939	0.943327
3753	KCNE1	25.53	4.32	-2.56374	0.00245111	0.0277707	1.55641
84898	PLXDC2	849.94	144.11	-2.56015	6.97344e-09	8.09024e-07	6.09204
2203	FBP1	7.7	1.31	-2.55987	0.0424789	0.187522	0.726949
132014	IL17RE	23.39	3.97	-2.55761	0.00418354	0.040972	1.38751
80183	RUBCNL	102.94	17.53	-2.5542	6.33217e-08	5.53774e-06	5.25667
127495	LRRC39	2.03	0.35	-2.54541	0.329691	0.646218	0.189621
84249	PSD2	5.76	0.99	-2.53874	0.0806915	0.282333	0.549238
137835	TMEM71	13.38	2.3	-2.5385	0.0153606	0.0976997	1.01011
3861	KRT14	3.73	0.64	-2.53771	0.194087	0.484025	0.315132
136227	COL26A1	2.04	0.35	-2.53652	0.278197	0.587899	0.230697
80144	FRAS1	317.1	54.66	-2.53637	5.20152e-08	4.83651e-06	5.31547
3884	KRT33B	2.03	0.35	-2.53598	0.331403	0.64821	0.188284
285596	FAM153A	2.03	0.35	-2.53185	0.268801	0.579008	0.237315
9514	GAL3ST1	2.02	0.35	-2.53134	0.343379	0.659956	0.180485
102723796	TLE7	2.03	0.35	-2.53134	0.342727	0.659645	0.180689
3480	IGF1R	1890.6	327.39	-2.52975	1.05825e-15	5.14006e-13	12.289
3788	KCNS2	9.43	1.63	-2.52857	0.0358581	0.168364	0.773751
8537	BCAS1	2.02	0.35	-2.52682	0.415705	0.728678	0.137464
6578	SLCO2A1	2	0.35	-2.52407	0.27183	0.581968	0.235101
57540	DISP3	2	0.35	-2.51955	0.264524	0.573691	0.241322
80725	SRCIN1	2.01	0.35	-2.51955	0.263926	0.572702	0.242072
10663	CXCR6	0.89	0.15	-2.51772	0.528285	0.814632	0.0890383
140597	TCEAL2	0.89	0.15	-2.51772	0.528285	0.814632	0.0890383
27232	GNMT	0.89	0.15	-2.51772	0.528285	0.814632	0.0890383
342527	SMTNL2	0.89	0.15	-2.51772	0.528285	0.814632	0.0890383
492	ATP2B3	0.89	0.15	-2.51772	0.528285	0.814632	0.0890383
50801	KCNK4	0.89	0.15	-2.51772	0.528285	0.814632	0.0890383
5988	RFPL1	0.89	0.15	-2.51772	0.528285	0.814632	0.0890383
6262	RYR2	0.89	0.15	-2.51772	0.528285	0.814632	0.0890383
6703	SPRR2D	3.71	0.65	-2.51327	0.158475	0.427778	0.368782
3782	KCNN3	373.87	65.53	-2.5123	5.23754e-18	3.68427e-15	14.4336
65055	REEP1	2	0.35	-2.51171	0.273604	0.583604	0.233882
26154	ABCA12	1.98	0.35	-2.51171	0.274802	0.58479	0.233
5174	PDZK1	5.63	0.99	-2.50859	0.1145	0.350652	0.455124
117166	WFIKKN1	0.88	0.15	-2.50795	0.523151	0.81294	0.0899415
26683	OR4F3	0.88	0.15	-2.50795	0.523151	0.81294	0.0899415
3821	KLRC1	0.88	0.15	-2.50795	0.523151	0.81294	0.0899415
4146	MATN1	0.88	0.15	-2.50795	0.523151	0.81294	0.0899415
5680	PSG11	0.88	0.15	-2.50795	0.523151	0.81294	0.0899415
6345	SRL	0.88	0.15	-2.50795	0.523151	0.81294	0.0899415
9560	CCL4L2	0.88	0.15	-2.50795	0.523151	0.81294	0.0899415
126353	MISP	20.55	3.62	-2.50306	0.0073916	0.0603566	1.21928
257240	KLHL34	3.72	0.66	-2.50259	0.163123	0.435218	0.361293
56102	PCDHGB3	25.65	4.53	-2.50253	0.00526484	0.0478555	1.32007
80760	ITIH5	3.72	0.66	-2.50157	0.174382	0.453856	0.343082
5340	PLG	3.76	0.66	-2.50112	0.159782	0.430063	0.366468
196500	PIANP	1.97	0.35	-2.49907	0.287774	0.599141	0.222471
100191040	C2CD4D	0.87	0.15	-2.49826	0.525763	0.813996	0.089378
11318	GPR182	0.87	0.15	-2.49826	0.525763	0.813996	0.089378
138065	RNF183	0.87	0.15	-2.49826	0.525763	0.813996	0.089378
152573	SHISA3	0.87	0.15	-2.49826	0.525763	0.813996	0.089378
401546	C9orf152	0.87	0.15	-2.49826	0.525763	0.813996	0.089378
4654	MYOD1	0.87	0.15	-2.49826	0.525763	0.813996	0.089378
51316	PLAC8	0.87	0.15	-2.49826	0.525763	0.813996	0.089378
6328	SCN3A	0.87	0.15	-2.49826	0.525763	0.813996	0.089378
6545	SLC7A4	0.87	0.15	-2.49826	0.525763	0.813996	0.089378
84435	ADGRA1	0.87	0.15	-2.49826	0.525763	0.813996	0.089378
8447	DOC2B	9.5	1.68	-2.49732	0.0745152	0.266781	0.573846
1080	CFTR	3.71	0.66	-2.49723	0.175189	0.455324	0.34168
5649	RELN	34.77	6.17	-2.49571	0.000925819	0.0135924	1.8667
162466	PHOSPHO1	1.97	0.35	-2.4934	0.34155	0.658467	0.181466
440730	TRIM67	1.95	0.35	-2.49337	0.342948	0.659653	0.180684
114783	LMTK3	0.87	0.15	-2.49119	0.527658	0.814632	0.0890383
147744	TMEM190	0.87	0.15	-2.49119	0.527658	0.814632	0.0890383
429	ASCL1	0.87	0.15	-2.49119	0.527658	0.814632	0.0890383
55930	MYO5C	0.87	0.15	-2.49119	0.527658	0.814632	0.0890383
6588	SLN	0.87	0.15	-2.49119	0.527658	0.814632	0.0890383
79473	OR52N1	0.87	0.15	-2.49119	0.527658	0.814632	0.0890383
79645	EFCAB1	0.87	0.15	-2.49119	0.527658	0.814632	0.0890383
83851	SYT16	0.87	0.15	-2.49119	0.527658	0.814632	0.0890383
9938	ARHGAP25	0.87	0.15	-2.49119	0.527658	0.814632	0.0890383
333926	PPM1J	3.69	0.66	-2.49105	0.147696	0.409938	0.387282
102723547	CSAG2	0.86	0.15	-2.48853	0.533255	0.816151	0.0882293
1232	CCR3	0.86	0.15	-2.48853	0.533255	0.816151	0.0882293
126364	LRRC25	0.86	0.15	-2.48853	0.533255	0.816151	0.0882293
1852	DUSP9	0.86	0.15	-2.48853	0.533255	0.816151	0.0882293
8843	HCAR3	0.86	0.15	-2.48853	0.533255	0.816151	0.0882293
121601	ANO4	9.13	1.63	-2.48835	0.0581477	0.227569	0.642886
377007	KLHL30	10.99	1.96	-2.48748	0.0474635	0.200972	0.696865
27033	ZBTB32	16.78	2.99	-2.48725	0.0315035	0.154753	0.810362
5959	RDH5	33.38	5.97	-2.48403	0.00325263	0.0342829	1.46492
10874	NMU	0.86	0.15	-2.48137	0.458755	0.762502	0.117759
119	ADD2	0.86	0.15	-2.48137	0.458755	0.762502	0.117759
23302	WSCD1	0.86	0.15	-2.48137	0.458755	0.762502	0.117759
255743	NPNT	0.86	0.15	-2.48137	0.458755	0.762502	0.117759
84448	ABLIM2	0.86	0.15	-2.48137	0.458755	0.762502	0.117759
375316	RBM44	5.47	0.98	-2.48058	0.117373	0.356614	0.447801
3783	KCNN4	297.8	53.39	-2.47958	4.0743e-15	1.78157e-12	11.7492
117248	GALNT15	287.76	51.7	-2.4765	8.72536e-09	9.87186e-07	6.0056
92369	SPSB4	80.69	14.51	-2.47507	0.00020452	0.00441048	2.35551
3664	IRF6	1.93	0.35	-2.47462	0.430504	0.739162	0.13126
170371	TMEM273	0.85	0.15	-2.47153	0.532956	0.816151	0.0882293
200150	PLD5	0.85	0.15	-2.47153	0.532956	0.816151	0.0882293
256949	KANK3	0.85	0.15	-2.47153	0.532956	0.816151	0.0882293
399947	C11orf87	0.85	0.15	-2.47153	0.532956	0.816151	0.0882293
4993	OR2C1	0.85	0.15	-2.47153	0.532956	0.816151	0.0882293
51208	CLDN18	0.85	0.15	-2.47153	0.532956	0.816151	0.0882293
646643	SBK2	0.85	0.15	-2.47153	0.532956	0.816151	0.0882293
6657	SOX2	0.85	0.15	-2.47153	0.532956	0.816151	0.0882293
6261	RYR1	5.38	0.97	-2.46978	0.110377	0.343026	0.464673
100288797	TMEM239	18.36	3.32	-2.46867	0.0115788	0.0803661	1.09493
84171	LOXL4	1711.21	309.47	-2.46715	3.74485e-16	1.89337e-13	12.7228
112268186	LOC112268186	0.85	0.15	-2.46434	0.534883	0.81737	0.0875815
58529	MYOZ1	0.85	0.15	-2.46434	0.534883	0.81737	0.0875815
342897	NCCRP1	5.43	0.99	-2.46278	0.170558	0.447823	0.348894
55509	BATF3	176.43	32.02	-2.46188	1.95848e-07	1.44686e-05	4.83957
55228	PNMA8A	115.71	21.02	-2.46097	3.14663e-09	3.94646e-07	6.40379
64093	SMOC1	940.34	171.53	-2.45469	1.58868e-11	3.17325e-09	8.4985
100507679	MUC22	0.84	0.15	-2.45437	0.537569	0.818975	0.0867295
3739	KCNA4	0.84	0.15	-2.45437	0.537569	0.818975	0.0867295
4593	MUSK	0.84	0.15	-2.45437	0.537569	0.818975	0.0867295
50617	ATP6V0A4	0.84	0.15	-2.45437	0.537569	0.818975	0.0867295
81472	OR2C3	0.84	0.15	-2.45437	0.537569	0.818975	0.0867295
89884	LHX4	5.44	0.99	-2.45318	0.0980234	0.31902	0.496182
3868	KRT16	5.37	0.98	-2.44845	0.0779334	0.275302	0.56019
375567	VWC2	14.61	2.68	-2.4483	0.0272517	0.140595	0.852032
90161	HS6ST2	28.76	5.28	-2.44606	0.000683733	0.010831	1.96533
1734	DIO2	77.21	14.2	-2.44335	1.93346e-06	0.000103239	3.98616
23281	MTUS2	0.83	0.15	-2.437	0.542083	0.822041	0.0851063
5454	POU3F2	0.83	0.15	-2.437	0.542083	0.822041	0.0851063
5676	PSG7	8.83	1.64	-2.43251	0.054299	0.218208	0.66113
5577	PRKAR2B	61.83	11.48	-2.42909	5.30514e-07	3.32682e-05	4.47797
83895	KRTAP1-5	12.15	2.26	-2.42589	0.0608944	0.234955	0.629015
2846	LPAR4	6.95	1.3	-2.42367	0.0889737	0.299834	0.523119
57715	SEMA4G	23.35	4.35	-2.42283	0.00951295	0.0708284	1.14979
9672	SDC3	755.95	141.21	-2.42043	2.27771e-18	1.75481e-15	14.7558
79144	PPDPF	455.21	85.08	-2.41959	4.22578e-13	1.19945e-10	9.92102
5196	PF4	10.51	1.97	-2.41936	0.0204184	0.117187	0.931122
5348	FXYD1	8.75	1.65	-2.40893	0.0466603	0.199124	0.700877
6354	CCL7	9243.43	1740.51	-2.40891	9.61127e-22	1.11072e-18	17.9544
4248	MGAT3	14	2.64	-2.40832	0.023843	0.129797	0.886736
51308	REEP2	34.68	6.54	-2.40757	0.000205304	0.00441117	2.35545
2246	FGF1	163.55	30.88	-2.4048	0.000183655	0.00408715	2.38858
84734	FAM167B	139.03	26.34	-2.39992	7.60373e-09	8.66343e-07	6.06231
1264	CNN1	13.9	2.65	-2.39038	0.0207018	0.118184	0.927441
5334	PLCL1	41.9	8.02	-2.38533	0.00267748	0.0297316	1.52678
1272	CNTN1	3.43	0.66	-2.38166	0.201024	0.493868	0.306389
389840	MAP3K15	8.53	1.64	-2.38121	0.0595729	0.231746	0.634988
93649	MYOCD	98.07	18.88	-2.37708	1.61014e-07	1.25544e-05	4.9012
388646	GBP7	98.15	18.91	-2.37566	0.000255206	0.00519368	2.28452
161253	REM2	3.45	0.67	-2.37496	0.252853	0.558632	0.252875
342977	NANOS3	3.37	0.65	-2.37298	0.17557	0.455581	0.341434
6704	SPRR2E	3.39	0.66	-2.36753	0.383478	0.698359	0.155922
2324	FLT4	5.04	0.98	-2.36598	0.110755	0.343644	0.463891
6506	SLC1A2	62.75	12.18	-2.36489	4.48485e-06	0.000214676	3.66822
219623	TMEM26	34.97	6.79	-2.36453	0.00238418	0.0272412	1.56477
400224	PLEKHD1	3.41	0.66	-2.36143	0.189659	0.477438	0.321083
1114	CHGB	3.37	0.66	-2.35944	0.181454	0.464442	0.333068
27151	CPAMD8	17.07	3.33	-2.3594	0.016305	0.101622	0.993012
25890	ABI3BP	29976.4	5843.19	-2.359	7.53354e-11	1.35428e-08	7.86829
57571	CARNS1	3.46	0.67	-2.35779	0.302104	0.616827	0.209836
482	ATP1B2	15.11	2.96	-2.35222	0.00617027	0.0534129	1.27235
8630	HSD17B6	11.79	2.31	-2.35114	0.0149489	0.0961284	1.01715
2752	GLUL	6628.36	1299.7	-2.35047	4.21762e-22	5.6864e-19	18.2452
4345	CD200	5.15	1.01	-2.3504	0.186236	0.472054	0.326009
84691	FAM71F1	5.02	0.99	-2.34001	0.12707	0.374291	0.426791
729020	RPEL1	3.36	0.66	-2.33775	0.253869	0.560118	0.25172
3554	IL1R1	4486.67	887.93	-2.33713	7.1339e-24	1.15419e-20	19.9377
100861412	FSBP	35.75	7.13	-2.32595	0.287819	0.599153	0.222462
430	ASCL2	448.23	90.11	-2.31453	0.00824231	0.0646713	1.18929
3728	JUP	57.91	11.7	-2.3077	0.000269013	0.00539432	2.26806
57094	CPA6	6.39	1.29	-2.30664	0.103234	0.329042	0.482749
4987	OPRL1	16.15	3.27	-2.30531	0.00895365	0.0682342	1.166
8632	DNAH17	60.27	12.26	-2.29711	0.00156416	0.0197747	1.70389
3201	HOXA4	111.74	22.74	-2.29672	6.08519e-08	5.41009e-06	5.2668
23148	NACAD	48.69	9.93	-2.29402	0.000508216	0.00886037	2.05255
55553	SOX6	37.42	7.63	-2.29387	0.0145208	0.0942283	1.02582
7223	TRPC4	67.72	13.86	-2.28891	6.21226e-05	0.0017664	2.75291
285	ANGPT2	1.71	0.35	-2.28597	0.408128	0.722917	0.140912
9481	SLC25A27	6.36	1.31	-2.27814	0.0881471	0.298167	0.525541
339416	ANKRD45	32.12	6.63	-2.27718	0.00234328	0.0268499	1.57106
154197	PNLDC1	1.7	0.35	-2.27628	0.410724	0.725036	0.139641
28984	RGCC	11.19	2.31	-2.27416	0.0295855	0.148386	0.828606
140699	MROH8	28.6	5.92	-2.27359	0.000539694	0.00921554	2.03548
10752	CHL1	14.21	2.95	-2.26962	0.0991968	0.321428	0.492916
107986755	LOC107986755	1.69	0.35	-2.26911	0.412659	0.726803	0.138584
28514	DLL1	25.28	5.26	-2.26459	0.00109918	0.0153307	1.81444
10894	LYVE1	1.67	0.35	-2.26447	0.344649	0.66147	0.17949
51305	KCNK9	1.68	0.35	-2.26083	0.406072	0.721881	0.141535
219770	GJD4	1.66	0.35	-2.25915	0.353346	0.669648	0.174154
55567	DNAH3	1.66	0.35	-2.25915	0.353346	0.669648	0.174154
4057	LTF	1.66	0.35	-2.2552	0.346424	0.663232	0.178335
9365	KL	153.17	32.1	-2.25458	1.28104e-06	7.24686e-05	4.13985
2786	GNG4	1.67	0.35	-2.24985	0.347153	0.663742	0.178001
414149	ACBD7	1.65	0.35	-2.24984	0.348593	0.665239	0.177023
124460	SNX20	3.05	0.64	-2.2484	0.256564	0.563299	0.249261
4058	LTK	3.05	0.64	-2.24833	0.265323	0.57473	0.240536
3691	ITGB4	4.71	0.99	-2.24789	0.139344	0.39538	0.402986
503542	SPRN	37.24	7.85	-2.24679	0.000195114	0.00426013	2.37058
3352	HTR1D	1.66	0.35	-2.24536	0.410286	0.724912	0.139715
341676	NEK5	1.64	0.35	-2.24535	0.411891	0.725924	0.139109
102724813	LOC102724813	1.65	0.35	-2.24381	0.411518	0.72577	0.139201
2700	GJA3	6.14	1.3	-2.24297	0.192391	0.481389	0.317504
126393	HSPB6	156.76	33.13	-2.24256	1.36823e-05	0.000532129	3.27398
1271	CNTFR	1.63	0.35	-2.24038	0.358407	0.673716	0.171523
401027	C2orf66	1.63	0.35	-2.24038	0.358407	0.673716	0.171523
152189	CMTM8	1.65	0.35	-2.23394	0.413416	0.727043	0.13844
4040	LRP6	673.12	143.25	-2.23237	1.60909e-18	1.30167e-15	14.8855
117283	IP6K3	78.17	16.65	-2.2313	0.000470672	0.00840508	2.07546
440590	ZYG11A	4.73	1.01	-2.2303	0.203144	0.496626	0.30397
146429	SLC22A31	6.17	1.32	-2.22955	0.152467	0.417671	0.379166
5327	PLAT	881.27	188.68	-2.22363	4.64191e-10	7.01883e-08	7.15374
7089	TLE2	3.04	0.65	-2.2233	0.224527	0.523884	0.280764
3972	LHB	3.05	0.66	-2.21463	0.23392	0.534991	0.271654
79187	FSD1	24.44	5.27	-2.21255	0.00415407	0.0408315	1.389
11076	TPPP	3.04	0.66	-2.21086	0.226774	0.526781	0.27837
114899	C1QTNF3	12.15	2.63	-2.20554	0.0226555	0.12583	0.900216
3872	KRT17	265.99	57.71	-2.2044	0.029577	0.148386	0.828606
84632	AFAP1L2	3.1	0.67	-2.20139	0.296014	0.608481	0.215753
10750	GRAP	3.08	0.67	-2.19351	0.273828	0.583816	0.233724
80150	ASRGL1	2.96	0.65	-2.19228	0.300613	0.614713	0.211328
79689	STEAP4	126.95	27.84	-2.18887	3.3203e-05	0.00107654	2.96797
23066	CAND2	58.48	12.83	-2.18789	8.56631e-05	0.00224626	2.64854
6781	STC1	7621.38	1673.72	-2.18699	5.84567e-18	3.94071e-15	14.4044
1404	HAPLN1	36.02	7.92	-2.18537	0.00115532	0.0158944	1.79875
7138	TNNT1	3.04	0.67	-2.18107	0.260019	0.567852	0.245765
5742	PTGS1	927.07	204.5	-2.1806	0.00931313	0.0700109	1.15483
2180	ACSL1	14283.6	3155.15	-2.17859	1.46397e-11	3.07604e-09	8.51201
1845	DUSP3	3524.02	778.8	-2.17789	1.93955e-27	6.27601e-24	23.2023
2735	GLI1	8.8	1.95	-2.17637	0.0764396	0.271567	0.566123
1300	COL10A1	182.81	40.54	-2.17276	1.21864e-05	0.000487755	3.3118
56265	CPXM1	382.45	84.89	-2.17158	0.143434	0.402606	0.39512
5655	KLK10	7.5	1.67	-2.16987	0.0949838	0.312283	0.505452
221002	RASGEF1A	7.5	1.67	-2.16904	0.102938	0.328554	0.483394
642574	IQANK1	11.81	2.64	-2.16102	0.0299261	0.149664	0.824882
9480	ONECUT2	3	0.67	-2.15968	0.291221	0.602514	0.220033
252995	FNDC5	45.84	10.26	-2.15913	0.000791966	0.0121683	1.91477
85442	KNDC1	8.72	1.95	-2.15877	0.100352	0.324006	0.489447
1236	CCR7	37.3	8.36	-2.15788	0.0114927	0.0799741	1.09705
22917	ZP1	13.34	2.99	-2.15703	0.0377237	0.174132	0.759122
283383	ADGRD1	688.8	155.12	-2.1507	3.07563e-05	0.00100934	2.99596
344558	SH3RF3	88.85	20.07	-2.14605	0.000469801	0.0084044	2.07549
206338	LVRN	517.57	116.94	-2.14597	4.26984e-15	1.81794e-12	11.7404
238	ALK	42.2	9.56	-2.14289	0.0010262	0.0146668	1.83366
941	CD80	4.45	1.01	-2.13836	0.236013	0.53728	0.269799
1959	EGR2	544.11	124.1	-2.13245	5.95718e-08	5.35451e-06	5.27128
23533	PIK3R5	17.28	3.94	-2.13203	0.0103147	0.0749692	1.12512
340273	ABCB5	4.42	1.01	-2.12607	0.336759	0.653561	0.184714
84457	PHYHIPL	4.32	0.99	-2.12315	0.246126	0.551152	0.258729
128653	C20orf141	14.58	3.35	-2.11969	0.0513903	0.211671	0.674339
79608	RIC3	5.79	1.34	-2.11305	0.17253	0.450821	0.345996
29949	IL19	8.52	1.97	-2.11152	0.087553	0.297093	0.527107
27345	KCNMB4	12.78	2.96	-2.11026	0.0174919	0.105874	0.975211
135295	SRSF12	7.19	1.67	-2.10736	0.129521	0.378799	0.421592
150159	SLC9B1	5.72	1.33	-2.10735	0.130191	0.379866	0.42037
168544	ZNF467	17.27	4.01	-2.10575	0.0470404	0.199837	0.699324
8642	DCHS1	367.43	85.4	-2.1052	0.000191603	0.00422337	2.37434
10129	FRY	198.48	46.13	-2.10512	0.0012404	0.0167237	1.77667
6853	SYN1	34.05	7.92	-2.10444	0.000488623	0.00863981	2.0635
10388	SYCP2	23.91	5.57	-2.1026	0.00214262	0.0250653	1.60093
654	BMP6	368.69	85.86	-2.10228	1.96123e-08	2.06044e-06	5.68604
84570	COL25A1	7.03	1.64	-2.09952	0.082175	0.285716	0.544065
1370	CPN2	32.95	7.69	-2.09842	0.0106459	0.0766874	1.11528
4744	NEFH	74.01	17.29	-2.09776	0.000177601	0.00398531	2.39954
5069	PAPPA	12086.4	2830.04	-2.09449	5.87477e-14	1.98017e-11	10.7033
341	APOC1	15.66	3.67	-2.09184	0.0310335	0.153217	0.814694
54466	SPIN2A	7.09	1.67	-2.09062	0.113171	0.348032	0.458381
402317	OR2A42	10.83	2.54	-2.08936	0.246544	0.55155	0.258415
9118	INA	47.68	11.21	-2.08802	0.00243905	0.0276922	1.55764
79190	IRX6	81.69	19.25	-2.08521	0.00833917	0.0652415	1.18548
4145	MATK	15.27	3.6	-2.08491	0.0202265	0.116499	0.933679
152110	NEK10	48.61	11.48	-2.08259	3.78755e-05	0.00118528	2.92618
9056	SLC7A7	328.18	77.82	-2.07628	4.71258e-09	5.77612e-07	6.23836
9429	ABCG2	12.39	2.95	-2.06916	0.0217829	0.12237	0.912326
50939	IMPG2	4.06	0.97	-2.06493	0.197543	0.488993	0.310698
10317	B3GALT5	32.89	7.88	-2.06235	0.00369965	0.0374807	1.42619
113730	KLHDC7B	210.77	50.56	-2.05964	0.0661153	0.247512	0.606404
5493	PPL	813.35	195.46	-2.057	1.22284e-08	1.32781e-06	5.87686
5167	ENPP1	183.23	44.41	-2.0448	2.31839e-06	0.000119838	3.92141
1004	CDH6	6.83	1.66	-2.04171	0.105147	0.33317	0.477334
645191	LINGO3	4.09	0.99	-2.04157	0.282628	0.593079	0.226888
22986	SORCS3	2.7	0.66	-2.04124	0.281582	0.592035	0.227653
145741	C2CD4A	2.73	0.67	-2.03864	0.341802	0.658467	0.181466
100533467	BIVM-ERCC5	58.62	14.27	-2.03846	0.391748	0.707455	0.150301
85458	DIXDC1	679.01	165.46	-2.03695	6.78171e-08	5.89899e-06	5.22922
7483	WNT9A	49.78	12.13	-2.0369	9.20255e-05	0.00237585	2.62418
6708	SPTA1	45.78	11.18	-2.03383	0.000323753	0.00630324	2.20044
23551	RASD2	20.19	4.94	-2.03173	0.0051645	0.0472604	1.3255
6252	RTN1	8.13	2	-2.02182	0.0906584	0.30305	0.518485
8643	PTCH2	4.1	1.01	-2.01829	0.273317	0.583389	0.234042
283659	PRTG	129.45	31.98	-2.01738	8.23385e-05	0.00219752	2.65807
254295	PHYHD1	93.62	23.18	-2.01374	0.000350496	0.00666404	2.17626
5578	PRKCA	887.56	220.2	-2.01105	4.55307e-14	1.63698e-11	10.786
4881	NPR1	11.94	2.97	-2.0091	0.0509257	0.210615	0.67651
3992	FADS1	2162.21	538.39	-2.00578	7.13011e-11	1.29616e-08	7.88734
3983	ABLIM1	295.54	73.61	-2.0054	2.89281e-12	7.54884e-10	9.12212
283298	OLFML1	1742.49	434.18	-2.00479	6.2255e-08	5.49576e-06	5.25997
120939	TMEM52B	10.7	2.67	-2.00391	0.16428	0.43665	0.359866
247	ALOX15B	17.4	4.34	-2.0024	0.0438651	0.191246	0.718409
55107	ANO1	23.84	5.95	-2.00191	0.0233095	0.128203	0.892101
10875	FGL2	352.49	88.08	-2.00067	4.629e-11	8.8109e-09	8.05498
5067	CNTN3	122.95	30.74	-1.99992	0.00152812	0.0194673	1.71069
8531	YBX3	1860.53	465.96	-1.99744	4.38883e-12	1.10948e-09	8.95488
140876	RIPOR3	292.62	73.49	-1.99349	2.8705e-13	8.7626e-11	10.0574
4608	MYBPH	10.4	2.63	-1.9863	0.0888244	0.299676	0.523347
100528030	POC1B-GALNT4	30.6	7.73	-1.98443	0.389013	0.704482	0.15213
392617	ELFN1	14.23	3.6	-1.98348	0.0285997	0.145043	0.838502
56833	SLAMF8	2176.39	550.45	-1.98325	2.09911e-07	1.5298e-05	4.81537
367	AR	50.4	12.76	-1.98181	0.000128794	0.00309701	2.50906
23089	PEG10	170.31	43.19	-1.9794	1.23756e-06	7.06915e-05	4.15063
107984345	SMIM38	10.56	2.68	-1.97808	0.085899	0.293901	0.531798
55679	LIMS2	230.72	58.6	-1.97713	1.51534e-11	3.10337e-09	8.50817
590	BCHE	9.19	2.34	-1.97565	0.159983	0.430319	0.366209
7111	TMOD1	332.2	84.57	-1.97386	2.58391e-10	4.09854e-08	7.38737
10110	SGK2	1.38	0.35	-1.97071	0.561573	0.836388	0.0775922
158131	OR1Q1	1.38	0.35	-1.97071	0.561573	0.836388	0.0775922
27063	ANKRD1	191.59	48.89	-1.97054	5.73356e-05	0.00165847	2.78029
3759	KCNJ2	143.13	36.55	-1.96939	0.000877432	0.0131067	1.88251
10610	ST6GALNAC2	16.5	4.23	-1.96474	0.181751	0.46478	0.332752
5662	PSD	16.98	4.35	-1.9643	0.0462895	0.198179	0.702942
3902	LAG3	93.59	24.02	-1.96244	0.00139194	0.0181908	1.74015
6556	SLC11A1	1.35	0.35	-1.96226	0.500449	0.794267	0.100033
64902	AGXT2	1.36	0.35	-1.96225	0.499589	0.793915	0.100226
8900	CCNA1	1.36	0.35	-1.96225	0.499589	0.793915	0.100226
92591	ASB16	1.37	0.35	-1.96223	0.498731	0.793253	0.100588
165904	XIRP1	2334.87	600.33	-1.95951	0.0469169	0.199609	0.699821
10580	SORBS1	23	5.93	-1.95603	0.0030298	0.0326795	1.48572
5169	ENPP3	1.34	0.35	-1.95525	0.496905	0.791748	0.101413
2555	GABRA2	1.36	0.35	-1.95522	0.495137	0.790412	0.102146
9498	SLC4A8	47.07	12.16	-1.95254	5.20883e-05	0.00156062	2.8067
729873	TBC1D3	3.92	1.01	-1.95175	0.450495	0.755871	0.121552
147495	APCDD1	188.65	48.79	-1.95109	4.05886e-05	0.00125561	2.90115
646658	SYNDIG1L	5.08	1.31	-1.95072	0.157281	0.425455	0.371147
7166	TPH1	1.34	0.35	-1.95028	0.503814	0.797418	0.098314
11006	LILRB4	1.35	0.35	-1.95027	0.502948	0.796671	0.0987212
11045	UPK1A	1.35	0.35	-1.95027	0.502948	0.796671	0.0987212
147699	PPM1N	1.36	0.35	-1.95026	0.502084	0.795769	0.099213
22871	NLGN1	6.33	1.64	-1.94966	0.123427	0.367904	0.434265
2299	FOXI1	1.33	0.35	-1.94841	0.504351	0.797878	0.0980634
6285	S100B	1.34	0.35	-1.9484	0.503484	0.797286	0.0983861
7434	VIPR2	1.34	0.35	-1.9484	0.503484	0.797286	0.0983861
64066	MMP27	5.12	1.33	-1.94354	0.192308	0.481389	0.317504
29118	DDX25	1.33	0.35	-1.94279	0.446805	0.752535	0.123473
1158	CKM	1.35	0.35	-1.94278	0.445172	0.750901	0.124417
3361	HTR5A	1.35	0.35	-1.94278	0.445172	0.750901	0.124417
5032	P2RY11	72.73	18.94	-1.94069	0.227646	0.527878	0.277467
100506658	OCLN	27.06	7.06	-1.93811	0.0744331	0.266605	0.574132
56911	MAP3K7CL	158.63	41.43	-1.93702	7.00064e-09	8.09024e-07	6.09204
146845	CFAP52	1.34	0.35	-1.93619	0.447093	0.752786	0.123329
2657	GDF1	1.34	0.35	-1.93619	0.447093	0.752786	0.123329
57526	PCDH19	13.64	3.56	-1.93542	0.0587581	0.229403	0.6394
112268384	LOC112268384	6.36	1.66	-1.93477	0.145604	0.406651	0.390778
5728	PTEN	2033.16	532.06	-1.93407	1.55759e-19	1.57502e-16	15.8027
55350	VNN3	21.38	5.6	-1.93227	0.00972649	0.0718561	1.14354
116369	SLC26A8	1.34	0.35	-1.93122	0.501939	0.795618	0.0992955
401387	LRRD1	1.34	0.35	-1.93122	0.501939	0.795618	0.0992955
124872	B4GALNT2	1.33	0.35	-1.93121	0.502835	0.796648	0.0987333
1053	CEBPE	0.55	0.14	-1.93119	0.632188	0.88205	0.0545068
105371419	LOC105371419	0.55	0.14	-1.93119	0.632188	0.88205	0.0545068
140690	CTCFL	0.55	0.14	-1.93119	0.632188	0.88205	0.0545068
148641	SLC35F3	0.55	0.14	-1.93119	0.632188	0.88205	0.0545068
219865	OR8G5	0.55	0.14	-1.93119	0.632188	0.88205	0.0545068
2793	GNGT2	0.55	0.14	-1.93119	0.632188	0.88205	0.0545068
2840	GPR17	0.55	0.14	-1.93119	0.632188	0.88205	0.0545068
285025	CCDC141	0.55	0.14	-1.93119	0.632188	0.88205	0.0545068
285513	GPRIN3	0.55	0.14	-1.93119	0.632188	0.88205	0.0545068
286187	PPP1R42	0.55	0.14	-1.93119	0.632188	0.88205	0.0545068
29993	PACSIN1	0.55	0.14	-1.93119	0.632188	0.88205	0.0545068
3360	HTR4	0.55	0.14	-1.93119	0.632188	0.88205	0.0545068
353189	SLCO4C1	0.55	0.14	-1.93119	0.632188	0.88205	0.0545068
3606	IL18	0.55	0.14	-1.93119	0.632188	0.88205	0.0545068
374569	ASPG	0.55	0.14	-1.93119	0.632188	0.88205	0.0545068
389257	LRRC14B	0.55	0.14	-1.93119	0.632188	0.88205	0.0545068
389421	LIN28B	0.55	0.14	-1.93119	0.632188	0.88205	0.0545068
462	SERPINC1	0.55	0.14	-1.93119	0.632188	0.88205	0.0545068
55065	SLC52A1	0.55	0.14	-1.93119	0.632188	0.88205	0.0545068
7054	TH	0.55	0.14	-1.93119	0.632188	0.88205	0.0545068
827	CAPN6	0.55	0.14	-1.93119	0.632188	0.88205	0.0545068
8343	H2BC7	0.55	0.14	-1.93119	0.632188	0.88205	0.0545068
84000	TMPRSS13	0.55	0.14	-1.93119	0.632188	0.88205	0.0545068
91181	NUP210L	0.55	0.14	-1.93119	0.632188	0.88205	0.0545068
9132	KCNQ4	0.55	0.14	-1.93119	0.632188	0.88205	0.0545068
9227	LRAT	0.55	0.14	-1.93119	0.632188	0.88205	0.0545068
93408	MYL10	0.55	0.14	-1.93119	0.632188	0.88205	0.0545068
114795	TMEM132B	323.7	84.89	-1.93096	1.56712e-07	1.23782e-05	4.90734
5672	PSG4	1.31	0.35	-1.9293	0.509734	0.802549	0.0955287
6489	ST8SIA1	12.47	3.28	-1.92874	0.0423807	0.187254	0.727569
2239	GPC4	222.96	58.68	-1.92596	0.000894194	0.0132605	1.87744
57722	IGDCC4	168.3	44.3	-1.9258	7.8743e-05	0.00213755	2.67008
8707	B3GALT2	1.33	0.35	-1.92471	0.450441	0.755871	0.121552
1770	DNAH9	1.31	0.34	-1.92469	0.452099	0.756771	0.121036
27255	CNTN6	1.31	0.34	-1.92469	0.452099	0.756771	0.121036
338596	ST8SIA6	1.31	0.34	-1.92469	0.452099	0.756771	0.121036
55531	ELMOD1	1.31	0.34	-1.92469	0.452099	0.756771	0.121036
1571	CYP2E1	27.83	7.33	-1.92386	0.0120557	0.0829305	1.08129
10661	KLF1	0.54	0.14	-1.91728	0.634747	0.88205	0.0545068
107080638	TBC1D7-LOC100130357	0.54	0.14	-1.91728	0.634747	0.88205	0.0545068
107985805	LOC107985805	0.54	0.14	-1.91728	0.634747	0.88205	0.0545068
131405	TRIM71	0.54	0.14	-1.91728	0.634747	0.88205	0.0545068
1555	CYP2B6	0.54	0.14	-1.91728	0.634747	0.88205	0.0545068
220032	GDPD4	0.54	0.14	-1.91728	0.634747	0.88205	0.0545068
23217	ZFR2	0.54	0.14	-1.91728	0.634747	0.88205	0.0545068
27039	PKD2L2	0.54	0.14	-1.91728	0.634747	0.88205	0.0545068
28316	CDH20	0.54	0.14	-1.91728	0.634747	0.88205	0.0545068
345275	HSD17B13	0.54	0.14	-1.91728	0.634747	0.88205	0.0545068
3641	INSL4	0.54	0.14	-1.91728	0.634747	0.88205	0.0545068
3742	KCNA6	0.54	0.14	-1.91728	0.634747	0.88205	0.0545068
4625	MYH7	0.54	0.14	-1.91728	0.634747	0.88205	0.0545068
50700	RDH8	0.54	0.14	-1.91728	0.634747	0.88205	0.0545068
548596	CKMT1A	0.54	0.14	-1.91728	0.634747	0.88205	0.0545068
55507	GPRC5D	0.54	0.14	-1.91728	0.634747	0.88205	0.0545068
5623	PSPN	0.54	0.14	-1.91728	0.634747	0.88205	0.0545068
6616	SNAP25	0.54	0.14	-1.91728	0.634747	0.88205	0.0545068
7104	TM4SF4	0.54	0.14	-1.91728	0.634747	0.88205	0.0545068
80309	SPHKAP	0.54	0.14	-1.91728	0.634747	0.88205	0.0545068
8823	FGF16	0.54	0.14	-1.91728	0.634747	0.88205	0.0545068
2810	SFN	1.3	0.34	-1.91716	0.507745	0.800898	0.0964229
111	ADCY5	7.4	1.96	-1.91583	0.15854	0.427859	0.3687
2494	NR5A2	1.32	0.35	-1.91193	0.512867	0.805209	0.0940914
200010	SLC5A9	1.31	0.35	-1.91191	0.513752	0.806129	0.0935955
59340	HRH4	1.3	0.34	-1.9119	0.514639	0.806816	0.0932253
8647	ABCB11	1.3	0.34	-1.9119	0.514639	0.806816	0.0932253
3694	ITGB6	65.33	17.36	-1.91176	0.00349172	0.0359596	1.44418
2982	GUCY1A1	7.4	1.97	-1.91038	0.116157	0.354051	0.450934
3673	ITGA2	2798.04	744.8	-1.9095	0.00874599	0.0670597	1.17354
8611	PLPP1	1427.09	380.03	-1.90891	9.78396e-17	5.65338e-14	13.2477
282969	FUOM	48.15	12.83	-1.90822	9.47314e-05	0.00243279	2.61389
253558	LCLAT1	361.24	96.29	-1.90753	2.25739e-17	1.35268e-14	13.8688
154075	SAMD3	1.3	0.35	-1.90479	0.515766	0.807566	0.0928218
83481	EPPK1	1.29	0.34	-1.90477	0.516657	0.808179	0.0924924
10017	BCL2L10	0.54	0.14	-1.90326	0.637328	0.88205	0.0545068
100289462	DEFB4B	0.54	0.14	-1.90326	0.637328	0.88205	0.0545068
100913187	APOBEC3A_B	0.54	0.14	-1.90326	0.637328	0.88205	0.0545068
1180	CLCN1	0.54	0.14	-1.90326	0.637328	0.88205	0.0545068
120356740	TOMT	0.54	0.14	-1.90326	0.637328	0.88205	0.0545068
129684	CNTNAP5	0.54	0.14	-1.90326	0.637328	0.88205	0.0545068
148808	MFSD4A	0.54	0.14	-1.90326	0.637328	0.88205	0.0545068
196410	METTL7B	0.54	0.14	-1.90326	0.637328	0.88205	0.0545068
255426	RASGEF1C	0.54	0.14	-1.90326	0.637328	0.88205	0.0545068
255798	SMCO1	0.54	0.14	-1.90326	0.637328	0.88205	0.0545068
3009	H1-5	0.54	0.14	-1.90326	0.637328	0.88205	0.0545068
337959	KRTAP13-2	0.54	0.14	-1.90326	0.637328	0.88205	0.0545068
343413	FCRL6	0.54	0.14	-1.90326	0.637328	0.88205	0.0545068
4118	MAL	0.54	0.14	-1.90326	0.637328	0.88205	0.0545068
441061	MARCHF11	0.54	0.14	-1.90326	0.637328	0.88205	0.0545068
441459	ANKRD18B	0.54	0.14	-1.90326	0.637328	0.88205	0.0545068
5444	PON1	0.54	0.14	-1.90326	0.637328	0.88205	0.0545068
54967	CT55	0.54	0.14	-1.90326	0.637328	0.88205	0.0545068
54997	TESC	0.54	0.14	-1.90326	0.637328	0.88205	0.0545068
570	BAAT	0.54	0.14	-1.90326	0.637328	0.88205	0.0545068
57530	CGN	0.54	0.14	-1.90326	0.637328	0.88205	0.0545068
728637	MEIKIN	0.54	0.14	-1.90326	0.637328	0.88205	0.0545068
7409	VAV1	0.54	0.14	-1.90326	0.637328	0.88205	0.0545068
8170	SLC14A2	0.54	0.14	-1.90326	0.637328	0.88205	0.0545068
8484	GALR3	0.54	0.14	-1.90326	0.637328	0.88205	0.0545068
8618	CADPS	0.54	0.14	-1.90326	0.637328	0.88205	0.0545068
7472	WNT2	893.3	238.81	-1.90325	1.81223e-05	0.000670938	3.17332
1958	EGR1	395.22	105.67	-1.90306	2.16781e-08	2.20914e-06	5.65578
171024	SYNPO2	389.77	104.41	-1.90034	0.0546014	0.219021	0.659514
56121	PCDHB15	18.63	4.99	-1.89987	0.0564061	0.223633	0.650465
57863	CADM3	241.55	64.76	-1.89924	0.000152794	0.00354164	2.4508
4856	CCN3	190.23	51.08	-1.89698	2.53743e-05	0.000873469	3.05875
219539	YPEL4	13.48	3.63	-1.89373	0.0347783	0.165305	0.781713
100288413	ERVMER34-1	0.53	0.14	-1.89298	0.639224	0.88205	0.0545068
10599	SLCO1B1	0.53	0.14	-1.89298	0.639224	0.88205	0.0545068
107987372	LOC107987372	0.53	0.14	-1.89298	0.639224	0.88205	0.0545068
11317	RBPJL	0.53	0.14	-1.89298	0.639224	0.88205	0.0545068
114569	MAL2	0.53	0.14	-1.89298	0.639224	0.88205	0.0545068
118427	OLFM3	0.53	0.14	-1.89298	0.639224	0.88205	0.0545068
119395	CALHM3	0.53	0.14	-1.89298	0.639224	0.88205	0.0545068
144423	GLT1D1	0.53	0.14	-1.89298	0.639224	0.88205	0.0545068
146330	FBXL16	0.53	0.14	-1.89298	0.639224	0.88205	0.0545068
150590	C2orf15	0.53	0.14	-1.89298	0.639224	0.88205	0.0545068
164832	LONRF2	0.53	0.14	-1.89298	0.639224	0.88205	0.0545068
22895	RPH3A	0.53	0.14	-1.89298	0.639224	0.88205	0.0545068
284805	C20orf203	0.53	0.14	-1.89298	0.639224	0.88205	0.0545068
29125	C11orf21	0.53	0.14	-1.89298	0.639224	0.88205	0.0545068
333929	SNAI3	0.53	0.14	-1.89298	0.639224	0.88205	0.0545068
338094	FAM151A	0.53	0.14	-1.89298	0.639224	0.88205	0.0545068
339896	GADL1	0.53	0.14	-1.89298	0.639224	0.88205	0.0545068
345611	IRGM	0.53	0.14	-1.89298	0.639224	0.88205	0.0545068
388531	RGS9BP	0.53	0.14	-1.89298	0.639224	0.88205	0.0545068
401024	FSIP2	0.53	0.14	-1.89298	0.639224	0.88205	0.0545068
5268	SERPINB5	0.53	0.14	-1.89298	0.639224	0.88205	0.0545068
63982	ANO3	0.53	0.14	-1.89298	0.639224	0.88205	0.0545068
6622	SNCA	0.53	0.14	-1.89298	0.639224	0.88205	0.0545068
6887	TAL2	0.53	0.14	-1.89298	0.639224	0.88205	0.0545068
7053	TGM3	0.53	0.14	-1.89298	0.639224	0.88205	0.0545068
7425	VGF	0.53	0.14	-1.89298	0.639224	0.88205	0.0545068
80736	SLC44A4	0.53	0.14	-1.89298	0.639224	0.88205	0.0545068
8360	H4C4	0.53	0.14	-1.89298	0.639224	0.88205	0.0545068
92558	BICDL1	0.53	0.14	-1.89298	0.639224	0.88205	0.0545068
9066	SYT7	665.89	179.54	-1.89098	5.82838e-06	0.000267131	3.57328
147968	CAPN12	3.71	1	-1.89091	0.260715	0.568632	0.245169
6869	TACR1	3.69	1	-1.8852	0.263781	0.572616	0.242136
5782	PTPN12	6072.96	1644.54	-1.88472	3.58032e-16	1.86858e-13	12.7285
4807	NHLH1	12.24	3.32	-1.8831	0.0486687	0.204046	0.690273
3039	HBA1	2.43	0.66	-1.88244	0.515492	0.807566	0.0928218
5175	PECAM1	42.07	11.41	-1.88206	0.00167853	0.02089	1.68006
23762	OSBP2	36.38	9.87	-1.88166	0.000623155	0.0101531	1.9934
23331	TTC28	882.22	239.63	-1.88034	6.46436e-14	2.13443e-11	10.6707
3738	KCNA3	20.29	5.51	-1.87974	0.0266601	0.138826	0.857529
10170	DHRS9	0.52	0.14	-1.87878	0.641844	0.88205	0.0545068
101928601	MEI4	0.52	0.14	-1.87878	0.641844	0.88205	0.0545068
124857	WFIKKN2	0.52	0.14	-1.87878	0.641844	0.88205	0.0545068
130813	C2orf50	0.52	0.14	-1.87878	0.641844	0.88205	0.0545068
163404	PLPPR5	0.52	0.14	-1.87878	0.641844	0.88205	0.0545068
22843	PPM1E	0.52	0.14	-1.87878	0.641844	0.88205	0.0545068
29842	TFCP2L1	0.52	0.14	-1.87878	0.641844	0.88205	0.0545068
342918	C19orf81	0.52	0.14	-1.87878	0.641844	0.88205	0.0545068
342933	ZSCAN5B	0.52	0.14	-1.87878	0.641844	0.88205	0.0545068
375323	LHFPL4	0.52	0.14	-1.87878	0.641844	0.88205	0.0545068
388325	SCIMP	0.52	0.14	-1.87878	0.641844	0.88205	0.0545068
474344	GIMAP6	0.52	0.14	-1.87878	0.641844	0.88205	0.0545068
51338	MS4A4A	0.52	0.14	-1.87878	0.641844	0.88205	0.0545068
51411	BIN2	0.52	0.14	-1.87878	0.641844	0.88205	0.0545068
54511	HMGCLL1	0.52	0.14	-1.87878	0.641844	0.88205	0.0545068
54769	DIRAS2	0.52	0.14	-1.87878	0.641844	0.88205	0.0545068
57047	PLSCR2	0.52	0.14	-1.87878	0.641844	0.88205	0.0545068
6991	DYNLT2	0.52	0.14	-1.87878	0.641844	0.88205	0.0545068
79148	MMP28	0.52	0.14	-1.87878	0.641844	0.88205	0.0545068
79949	PLEKHS1	0.52	0.14	-1.87878	0.641844	0.88205	0.0545068
83259	PCDH11Y	0.52	0.14	-1.87878	0.641844	0.88205	0.0545068
84539	MCHR2	0.52	0.14	-1.87878	0.641844	0.88205	0.0545068
8549	LGR5	0.52	0.14	-1.87878	0.641844	0.88205	0.0545068
92211	CDHR1	0.52	0.14	-1.87878	0.641844	0.88205	0.0545068
22891	ZNF365	74.35	20.23	-1.87772	4.36896e-05	0.00134383	2.87166
8120	AP3B2	27.86	7.58	-1.87735	0.00939897	0.0703156	1.15295
26740	OR1J2	14.81	4.03	-1.877	0.0913393	0.304326	0.516661
146227	BEAN1	4.76	1.3	-1.8754	0.235192	0.536503	0.270428
202333	CMYA5	105.44	28.82	-1.87134	0.000774821	0.0119845	1.92138
10412	NSA2	821.78	224.67	-1.87096	2.74125e-18	2.01594e-15	14.6955
3663	IRF5	17.89	4.89	-1.87058	0.0233686	0.128367	0.891547
55800	SCN3B	15.56	4.27	-1.86561	0.0170677	0.104519	0.980806
56963	RGMA	10.75	2.95	-1.86421	0.0707556	0.257682	0.588916
54674	LRRN3	76.08	20.9	-1.86394	1.55363e-05	0.000585924	3.23216
23242	COBL	2.37	0.65	-1.86377	0.329248	0.645828	0.189883
1311	COMP	361.48	99.65	-1.85903	7.25198e-05	0.00200221	2.69849
90853	SPOCD1	579.39	159.72	-1.85902	2.97602e-08	2.88318e-06	5.54013
6975	TECTB	2.38	0.66	-1.85442	0.384457	0.69952	0.1552
27202	C5AR2	195.28	54.01	-1.85433	0.000455588	0.00821735	2.08527
101927345	LOC101927345	0.51	0.14	-1.854	0.646428	0.88205	0.0545068
117156	SCGB3A2	0.51	0.14	-1.854	0.646428	0.88205	0.0545068
126520	PLK5	0.51	0.14	-1.854	0.646428	0.88205	0.0545068
143162	FRMPD2	0.51	0.14	-1.854	0.646428	0.88205	0.0545068
168433	RNF133	0.51	0.14	-1.854	0.646428	0.88205	0.0545068
169522	KCNV2	0.51	0.14	-1.854	0.646428	0.88205	0.0545068
26280	IL1RAPL2	0.51	0.14	-1.854	0.646428	0.88205	0.0545068
284071	MEIOC	0.51	0.14	-1.854	0.646428	0.88205	0.0545068
317772	H2AC21	0.51	0.14	-1.854	0.646428	0.88205	0.0545068
390093	OR10A6	0.51	0.14	-1.854	0.646428	0.88205	0.0545068
4948	OCA2	0.51	0.14	-1.854	0.646428	0.88205	0.0545068
4994	OR3A1	0.51	0.14	-1.854	0.646428	0.88205	0.0545068
5473	PPBP	0.51	0.14	-1.854	0.646428	0.88205	0.0545068
55843	ARHGAP15	0.51	0.14	-1.854	0.646428	0.88205	0.0545068
55879	GABRQ	0.51	0.14	-1.854	0.646428	0.88205	0.0545068
64478	CSMD1	0.51	0.14	-1.854	0.646428	0.88205	0.0545068
728116	ZBTB8B	0.51	0.14	-1.854	0.646428	0.88205	0.0545068
84258	SYT3	0.51	0.14	-1.854	0.646428	0.88205	0.0545068
161198	CLEC14A	2.41	0.67	-1.85257	0.392122	0.707977	0.149981
84665	MYPN	336.07	93.07	-1.8523	1.45701e-05	0.000559928	3.25187
25805	BAMBI	220.74	61.18	-1.85129	0.00423446	0.0412707	1.38436
3798	KIF5A	32.25	8.95	-1.85013	0.0173251	0.105337	0.977418
100131897	INSYN2B	68.58	19.05	-1.84812	0.0235183	0.128766	0.8902
9687	GREB1	238.6	66.33	-1.84691	1.11704e-07	9.31577e-06	5.03078
23149	FCHO1	39.44	10.99	-1.84323	0.00831064	0.0651443	1.18612
84253	GARNL3	7.09	1.98	-1.84267	0.102144	0.326856	0.485643
123036	TC2N	10.52	2.94	-1.84013	0.208998	0.503979	0.297588
94031	HTRA3	893.84	250.1	-1.83751	0.114464	0.350652	0.455124
161247	FITM1	2.37	0.66	-1.83715	0.335381	0.652472	0.185438
83987	CCDC8	150.11	42.02	-1.83691	0.000818419	0.0124447	1.90501
84101	USP44	4.71	1.32	-1.83561	0.176069	0.456509	0.34055
5630	PRPH	2.4	0.67	-1.83403	0.401547	0.717584	0.144127
220441	RNF152	334.9	93.94	-1.83387	1.89099e-07	1.40988e-05	4.85082
9750	RIPOR2	189.48	53.25	-1.83127	1.70949e-06	9.37556e-05	4.028
155	ADRB3	2.4	0.68	-1.83063	0.447485	0.753028	0.123189
57834	CYP4F11	2.36	0.66	-1.8304	0.345675	0.662562	0.178774
23037	PDZD2	219.74	61.81	-1.82979	5.62833e-06	0.000259432	3.58598
23400	ATP13A2	537.57	151.53	-1.82687	9.62578e-10	1.33107e-07	6.8758
283358	B4GALNT3	304.55	85.87	-1.82651	7.29209e-07	4.40219e-05	4.35633
84525	HOPX	8.03	2.26	-1.8259	0.119364	0.360633	0.442934
4897	NRCAM	157.45	44.43	-1.82549	2.0172e-06	0.000107004	3.9706
81569	ACTL8	7.03	1.98	-1.82531	0.15691	0.424949	0.371663
54033	RBM11	2.38	0.67	-1.82408	0.391596	0.707259	0.150422
131873	COL6A6	57.55	16.29	-1.82137	0.00433865	0.0419532	1.37723
9229	DLGAP1	16.25	4.6	-1.82051	0.0193234	0.112904	0.947289
149076	ZNF362	386.99	109.63	-1.81967	9.60367e-10	1.33107e-07	6.8758
10266	RAMP2	2.37	0.67	-1.81713	0.381735	0.696162	0.15729
11037	STON1	55.26	15.71	-1.81469	0.00539093	0.0485905	1.31345
3316	HSPB2	297.11	84.54	-1.81327	1.91443e-06	0.000103239	3.98616
84951	TNS4	8.09	2.31	-1.81049	0.0924411	0.306669	0.51333
54463	RETREG1	313.12	89.27	-1.81039	5.09092e-12	1.24797e-09	8.9038
54836	BSPRY	2.37	0.67	-1.81034	0.469197	0.770428	0.113268
80741	LY6G5C	2.37	0.67	-1.81034	0.469197	0.770428	0.113268
4070	TACSTD2	397.41	113.41	-1.80908	1.8103e-10	3.011e-08	7.52129
84327	ZBED3	12.43	3.55	-1.80821	0.0946211	0.31147	0.506584
9846	GAB2	638.69	182.57	-1.80671	1.45967e-13	4.7232e-11	10.3258
151354	LRATD1	28.53	8.16	-1.80567	0.0109308	0.0779414	1.10823
154664	ABCA13	37.12	10.65	-1.80116	0.0280165	0.143284	0.843802
91683	SYT12	11.59	3.33	-1.79918	0.0817521	0.28463	0.545719
25893	TRIM58	43.47	12.51	-1.79713	0.000186099	0.00413585	2.38343
8676	STX11	289.68	83.63	-1.79245	4.51669e-06	0.000215562	3.66643
23017	FAIM2	8.1	2.34	-1.79125	0.156216	0.423944	0.372691
7122	CLDN5	5.67	1.64	-1.79125	0.168018	0.443669	0.35294
390937	ERFL	6.76	1.95	-1.79029	0.169867	0.446946	0.349745
11075	STMN2	193.14	55.97	-1.78687	3.66977e-05	0.00116181	2.93486
4747	NEFL	26.07	7.56	-1.78668	0.0112789	0.0792018	1.10127
11228	RASSF8	2914.48	845.56	-1.78526	8.071e-23	1.1871e-19	18.9255
441631	TSPAN11	28.23	8.2	-1.78403	0.00284671	0.0311879	1.50601
26579	MYEOV	22.68	6.6	-1.78178	0.023452	0.128533	0.890985
126014	OSCAR	28.5	8.29	-1.78108	0.0101868	0.0742735	1.12917
6690	SPINK1	6.74	1.97	-1.77456	0.204837	0.499135	0.301782
129530	LYG1	3.4	0.99	-1.77426	0.303709	0.618845	0.208418
23225	NUP210	12.18	3.57	-1.7727	0.060414	0.233893	0.630983
375616	KCP	3.4	0.99	-1.77266	0.313087	0.629589	0.200943
26298	EHF	206.72	60.51	-1.77239	0.00282079	0.031008	1.50853
112268131	LOC112268131	10.15	2.97	-1.77204	0.0723788	0.261567	0.582418
101059906	LOC101059906	3.36	0.98	-1.77181	0.248305	0.553503	0.25688
440073	IQSEC3	6.62	1.94	-1.77046	0.23359	0.534678	0.271907
57611	ISLR2	21.19	6.22	-1.7685	0.0218039	0.122445	0.912058
169355	IDO2	3.38	0.99	-1.76681	0.280761	0.591026	0.228393
70	ACTC1	6.7	1.97	-1.76675	0.163083	0.435218	0.361293
10897	YIF1A	764.2	224.85	-1.76499	1.05608e-17	6.83453e-15	14.1653
399668	SMIM10L2A	13.42	3.96	-1.7623	0.0680841	0.251606	0.599279
10687	PNMA2	633.85	186.85	-1.76222	2.34302e-05	0.000824079	3.08403
114800	CCDC85A	3.31	0.97	-1.76216	0.316505	0.633329	0.198371
4065	LY75	463.5	136.75	-1.76104	4.85506e-07	3.12948e-05	4.50453
460	ASTN1	11.02	3.26	-1.7596	0.0660369	0.247374	0.606645
55349	CHDH	7.65	2.26	-1.75915	0.174829	0.454679	0.342295
10046	MAMLD1	295.93	87.47	-1.75847	9.05153e-12	2.03395e-09	8.69166
1592	CYP26A1	3.42	1.01	-1.75815	0.354366	0.670447	0.173635
57412	AS3MT	28.88	8.54	-1.75739	0.00716359	0.058982	1.22928
200958	MUC20	16.45	4.87	-1.75485	0.0270507	0.13987	0.854275
165631	PARP15	442.38	131.16	-1.75399	0.000180222	0.00402896	2.39481
196446	MYRFL	3.33	0.99	-1.74975	0.301472	0.615849	0.210526
57216	VANGL2	4.35	1.3	-1.74689	0.27322	0.583389	0.234042
26191	PTPN22	34.64	10.34	-1.74425	0.0168257	0.103546	0.984866
64109	CRLF2	3.38	1.01	-1.74415	0.337919	0.654597	0.184026
126282	TNFAIP8L1	17.41	5.21	-1.74085	0.0287563	0.145597	0.836848
4036	LRP2	9.76	2.93	-1.7365	0.126892	0.373985	0.427146
10863	ADAM28	17.39	5.22	-1.73498	0.0692432	0.254958	0.593531
90427	BMF	52.31	15.72	-1.73457	0.000207285	0.00444012	2.35261
79974	CPED1	2262.96	680.55	-1.73344	3.7314e-15	1.67695e-12	11.7755
23350	U2SURP	1082.36	325.53	-1.73331	4.07474e-11	7.84824e-09	8.10523
126755	LRRC38	5.43	1.63	-1.73251	0.222215	0.520066	0.283942
7048	TGFBR2	5977.54	1799.57	-1.7319	3.80893e-27	1.02708e-23	22.9884
10891	PPARGC1A	60.54	18.23	-1.73157	0.0114237	0.0797026	1.09853
55540	IL17RB	4.36	1.31	-1.73077	0.292501	0.604506	0.2186
3040	HBA2	3.36	1.01	-1.73013	0.431167	0.739349	0.131151
7052	TGM2	35338.4	10651.9	-1.73012	3.4226e-10	5.32445e-08	7.27373
7484	WNT9B	4.4	1.33	-1.72659	0.245664	0.550421	0.259305
25840	METTL7A	75.27	22.81	-1.72209	0.000145546	0.00342266	2.46564
23022	PALLD	3075.01	932.61	-1.72125	8.68224e-22	1.08054e-18	17.9664
9024	BRSK2	4.4	1.34	-1.71895	0.24786	0.553044	0.257241
5097	PCDH1	44.63	13.58	-1.71699	0.0298377	0.149318	0.825889
3603	IL16	32.61	9.93	-1.71562	0.00750873	0.0607742	1.21628
5343	PLGLB1	5.49	1.67	-1.7152	0.323531	0.640842	0.193249
1230	CCR1	229.38	69.99	-1.71256	0.00117207	0.0160703	1.79398
55717	WDR11	1652.09	504.66	-1.71092	2.13508e-14	8.03335e-12	11.0951
84225	ZMYND15	30.15	9.22	-1.70992	0.00675578	0.0567649	1.24592
8835	SOCS2	200.8	61.44	-1.70859	9.78886e-05	0.00249408	2.60309
3911	LAMA5	861.14	263.72	-1.70725	8.45652e-08	7.23905e-06	5.14032
404217	CTXN1	57.84	17.73	-1.70554	8.40619e-05	0.00221504	2.65462
144100	PLEKHA7	58.27	17.89	-1.70332	0.0109585	0.0779558	1.10815
5178	PEG3	69.27	21.29	-1.70236	0.00012536	0.0030317	2.51831
25878	MXRA5	9235.06	2837.95	-1.70227	0.0336964	0.161725	0.791223
5244	ABCB4	5.42	1.67	-1.69983	0.22193	0.519925	0.284059
2353	FOS	5.41	1.67	-1.69956	0.214368	0.511245	0.291371
6096	RORB	37.24	11.49	-1.69645	0.0255975	0.135473	0.868146
84824	FCRLA	35.32	10.9	-1.69565	0.00364394	0.0371335	1.43023
8646	CHRD	145.1	44.89	-1.69259	0.00305279	0.0327744	1.48447
28996	HIPK2	2674.7	827.51	-1.69253	2.60447e-08	2.58514e-06	5.58752
357	SHROOM2	4.29	1.33	-1.68906	0.369426	0.684157	0.164844
56112	PCDHGA3	47.32	14.68	-1.68843	0.0011102	0.0154048	1.81234
866	SERPINA6	6.36	1.98	-1.68714	0.151358	0.415763	0.381154
9022	CLIC3	360.09	111.91	-1.68604	0.0872358	0.296448	0.528052
283229	CRACR2B	12.84	4	-1.68145	0.0877777	0.297434	0.526609
57556	SEMA6A	257.26	80.55	-1.67522	0.00432374	0.0419136	1.37764
116442	RAB39B	6.43	2.01	-1.67439	0.213781	0.510669	0.29186
2124	EVI2B	49.39	15.5	-1.67172	0.00268162	0.0297544	1.52645
9708	PCDHGA8	10.17	3.2	-1.66734	0.180436	0.462728	0.334675
63895	PIEZO2	27.95	8.8	-1.66683	0.0178708	0.107205	0.969785
441869	ANKRD65	11.44	3.6	-1.66662	0.0591519	0.230496	0.637337
9881	TRANK1	2169.1	683.53	-1.66601	2.18679e-05	0.000775879	3.11021
6248	RSC1A1	88.19	27.85	-1.66282	0.203081	0.496547	0.304039
2308	FOXO1	1806.09	570.71	-1.66203	5.68279e-06	0.000261198	3.58303
116159	CYYR1	33.04	10.45	-1.66016	0.00853859	0.0661301	1.1796
7066	THPO	12.51	3.97	-1.65779	0.0540567	0.217666	0.662208
10365	KLF2	72.76	23.09	-1.65577	8.77659e-05	0.00229397	2.63941
64699	TMPRSS3	2.02	0.64	-1.65461	0.444279	0.750377	0.124721
121512	FGD4	131	41.65	-1.65333	0.000152648	0.00354164	2.4508
85376	RIMBP3	16.56	5.26	-1.65328	0.064764	0.243932	0.612731
256957	HEATR9	2.07	0.66	-1.65303	0.472311	0.772117	0.112317
80326	WNT10A	2.07	0.66	-1.65303	0.472311	0.772117	0.112317
2633	GBP1	110046	35010.7	-1.65224	1.50584e-05	0.0005746	3.24063
388650	DIPK1A	869.71	276.73	-1.65208	2.17151e-12	5.7595e-10	9.23962
90187	EMILIN3	2.06	0.66	-1.64893	0.510619	0.803472	0.0950293
150864	FAM117B	293.02	93.47	-1.64841	0.000409224	0.00756086	2.12143
163351	GBP6	41.23	13.16	-1.64812	0.00504221	0.0464038	1.33345
64115	VSIR	905.99	289.08	-1.64802	0.000149665	0.00350425	2.45541
133690	CAPSL	3.06	0.98	-1.64672	0.344652	0.66147	0.17949
3667	IRS1	5673.08	1813.69	-1.6452	3.42042e-07	2.32517e-05	4.63355
8785	MATN4	2.06	0.66	-1.64519	0.474697	0.77405	0.111231
4131	MAP1B	7832.37	2504.73	-1.6448	4.8251e-07	3.12261e-05	4.50548
10870	HCST	5.02	1.61	-1.64475	0.264774	0.573925	0.241145
55705	IPO9	1400.24	448.49	-1.64253	1.93051e-17	1.2013e-14	13.9204
51157	ZNF580	162.56	52.11	-1.64124	3.34249e-07	2.28178e-05	4.64173
5158	PDE6B	2.03	0.65	-1.64124	0.424739	0.734403	0.134066
10998	SLC27A5	3.08	0.99	-1.6408	0.372976	0.688149	0.162318
158787	RIBC1	3.07	0.99	-1.63905	0.315599	0.632642	0.198842
30061	SLC40A1	64.61	20.75	-1.63847	0.013388	0.0890787	1.05023
9884	LRRC37A	4.09	1.31	-1.63779	0.436462	0.743631	0.128642
8909	ENDOU	2.02	0.65	-1.6373	0.407338	0.72257	0.14112
4135	MAP6	59.52	19.15	-1.6362	0.000417671	0.00766157	2.11568
57101	ANO2	1.98	0.64	-1.63561	0.468504	0.770317	0.11333
6335	SCN9A	2.04	0.66	-1.63531	0.414958	0.728602	0.13751
27147	DENND2A	50.9	16.39	-1.63484	0.00276539	0.0304777	1.51602
7450	VWF	2.01	0.65	-1.63335	0.416444	0.729341	0.13707
9832	JAKMIP2	2.01	0.65	-1.63335	0.416444	0.729341	0.13707
149483	CCDC17	4.05	1.31	-1.63329	0.283764	0.594315	0.225983
10406	WFDC2	44.89	14.48	-1.63199	0.0681952	0.25196	0.598669
654463	FER1L6	200.13	64.58	-1.63182	0.203906	0.497811	0.302935
4861	NPAS1	3.08	1	-1.63129	0.405474	0.72169	0.141649
10991	SLC38A3	2.04	0.66	-1.63106	0.416304	0.729254	0.137121
139728	PNCK	2.04	0.66	-1.63106	0.416304	0.729254	0.137121
58494	JAM2	368.07	118.85	-1.63076	1.25639e-08	1.35514e-06	5.86802
5743	PTGS2	46147.1	14910.4	-1.62993	0.000180001	0.00402896	2.39481
341208	HEPHL1	62.93	20.34	-1.62938	0.310434	0.626873	0.20282
117144	CATSPER1	3.08	1	-1.62927	0.351888	0.668451	0.174931
1286	COL4A4	43.26	14.01	-1.62648	0.0128132	0.0867021	1.06197
2268	FGR	3.04	0.99	-1.62631	0.304098	0.618958	0.208339
100129924	TMEM269	2	0.65	-1.6259	0.418802	0.730859	0.136166
5317	PKP1	180.02	58.34	-1.6256	1.00474e-07	8.51086e-06	5.07003
352909	DNAAF3	7.12	2.31	-1.62535	0.161328	0.432284	0.36423
50506	DUOX2	5.16	1.67	-1.62524	0.351184	0.667976	0.175239
57482	CRACD	41.05	13.32	-1.62419	0.0052433	0.0477923	1.32064
124056	NOXO1	2.05	0.67	-1.62298	0.469437	0.770428	0.113268
10313	RTN3	2311.22	751.47	-1.62086	1.08053e-11	2.36242e-09	8.62664
221393	ADGRF4	36.87	11.99	-1.62015	0.041249	0.184051	0.735063
3481	IGF2	46.14	15.01	-1.62001	0.00571256	0.050477	1.29691
2847	MCHR1	6.11	1.99	-1.61964	0.250501	0.555871	0.255026
81706	PPP1R14C	392.79	127.98	-1.61783	2.81502e-05	0.000942945	3.02551
100506164	HSFX1	10.13	3.3	-1.61777	0.0855582	0.292962	0.533188
3479	IGF1	40.63	13.24	-1.61721	0.0164626	0.102248	0.990345
389941	C1QL3	2.01	0.66	-1.6162	0.42101	0.73258	0.135145
9166	EBAG9	242.61	79.22	-1.61481	2.14562e-09	2.75507e-07	6.55987
8522	GAS7	259.18	84.64	-1.61455	0.000734099	0.0114422	1.94149
11184	MAP4K1	2.03	0.66	-1.61357	0.420987	0.73258	0.135145
386617	KCTD8	2.03	0.66	-1.61357	0.420987	0.73258	0.135145
113263	GLCCI1	97.68	31.93	-1.61316	0.00016943	0.00382851	2.41697
85407	NKD1	25.09	8.2	-1.61309	0.0121044	0.0832125	1.07981
144193	AMDHD1	5.01	1.64	-1.61281	0.211346	0.507475	0.294585
283129	MAJIN	2	0.66	-1.61092	0.463837	0.766774	0.115333
729438	CASTOR2	446.65	146.28	-1.61043	8.21682e-10	1.16462e-07	6.93381
2207	FCER1G	66.29	21.71	-1.61017	0.00914537	0.0692711	1.15945
3781	KCNN2	2.06	0.68	-1.60927	0.517874	0.809017	0.0920422
27071	DAPP1	3.06	1	-1.60892	0.357966	0.673394	0.171731
10000	AKT3	2363.25	775.01	-1.60849	1.17528e-12	3.22285e-10	9.49176
80975	TMPRSS5	2.06	0.67	-1.60828	0.473017	0.772675	0.112003
3899	AFF3	20.79	6.84	-1.60413	0.0374633	0.173369	0.761028
56113	PCDHGA2	38.63	12.72	-1.60215	0.00343507	0.0356256	1.44824
6817	SULT1A1	21.14	6.98	-1.59992	0.0475606	0.201225	0.696319
1903	S1PR3	6309.91	2083.91	-1.59833	1.22222e-11	2.60187e-09	8.58471
3177	SLC29A2	2.04	0.67	-1.5966	0.466449	0.769144	0.113993
149465	CFAP57	4.01	1.33	-1.59579	0.294505	0.607057	0.216771
9625	AATK	2.03	0.67	-1.59268	0.459993	0.76336	0.117271
26045	LRRTM2	188.43	62.51	-1.59195	0.000910078	0.0134467	1.87138
388341	LRRC75A	16.7	5.54	-1.59111	0.0793757	0.278873	0.554594
6549	SLC9A2	1.97	0.66	-1.58854	0.538426	0.819646	0.0863735
5143	PDE4C	685.43	228.06	-1.58758	0.0611918	0.235598	0.627828
57644	MYH7B	3.04	1.01	-1.58737	0.412763	0.726828	0.138568
10677	AVIL	84.61	28.17	-1.58679	0.00191945	0.0230547	1.63724
349136	WDR86	142.05	47.37	-1.58445	0.0156822	0.098917	1.00473
78994	PRR14	227.14	75.78	-1.58371	1.64472e-07	1.26714e-05	4.89717
9966	TNFSF15	1333.18	444.88	-1.58337	3.3557e-06	0.000167052	3.77715
126823	KLHDC9	8.85	2.97	-1.57683	0.128733	0.37704	0.423613
5004	ORM1	8.85	2.97	-1.5764	0.282285	0.592821	0.227076
23539	SLC16A8	22.74	7.63	-1.57586	0.0252704	0.134402	0.871595
1410	CRYAB	1792.59	601.68	-1.57498	0.000502088	0.00877244	2.05688
6581	SLC22A3	2751.44	924.24	-1.57385	5.48737e-05	0.00162008	2.79046
10666	CD226	29.4	9.88	-1.5733	0.00865817	0.0666099	1.17646
360	AQP3	17.59	5.91	-1.57256	0.0288111	0.145758	0.836367
4973	OLR1	24.64	8.29	-1.57245	0.102517	0.327789	0.484405
11113	CIT	1577.77	530.79	-1.57168	8.36522e-05	0.00221364	2.65489
30811	HUNK	10.78	3.63	-1.57116	0.103489	0.329466	0.482189
54757	FAM20A	1940.6	653.7	-1.56979	4.12795e-05	0.00127212	2.89547
8224	SYN3	8.83	2.97	-1.5696	0.117691	0.357381	0.446869
374383	NCR3LG1	595.79	201.08	-1.56705	4.31602e-06	0.000208444	3.68101
83850	ESYT3	8.72	2.94	-1.566	0.166662	0.441033	0.355529
1396	CRIP1	15.7	5.31	-1.56525	0.0833936	0.287947	0.540687
3381	IBSP	29.91	10.13	-1.56225	0.0408807	0.18276	0.738118
2009	EML1	2029.79	687.78	-1.5613	8.27811e-10	1.16462e-07	6.93381
58480	RHOU	538.24	182.46	-1.56069	0.000793824	0.0121805	1.91433
728	C5AR1	5.79	1.96	-1.55821	0.21311	0.509969	0.292456
387763	C11orf96	1402.26	476.33	-1.55772	0.0361873	0.169408	0.771066
3400	ID4	63.81	21.69	-1.55689	0.00166786	0.0207732	1.6825
2118	ETV4	113.57	38.63	-1.55597	6.41189e-05	0.0018136	2.74146
25803	SPDEF	1.01	0.34	-1.55521	0.670584	0.891705	0.0497789
346528	OR2A1	1.01	0.34	-1.55521	0.670584	0.891705	0.0497789
60680	CELF5	1.01	0.34	-1.55521	0.670584	0.891705	0.0497789
85478	CCDC65	1.01	0.34	-1.55521	0.670584	0.891705	0.0497789
9957	HS3ST1	1.02	0.35	-1.55518	0.669644	0.891344	0.0499547
221981	THSD7A	1.03	0.35	-1.55515	0.668744	0.890971	0.0501365
387273	KRTAP5-10	1.03	0.35	-1.55515	0.668744	0.890971	0.0501365
81027	TUBB1	1.03	0.35	-1.55515	0.668744	0.890971	0.0501365
2043	EPHA4	372.04	126.61	-1.55506	7.92826e-05	0.00213786	2.67002
7351	UCP2	15.6	5.32	-1.55251	0.0602581	0.233625	0.631481
84215	ZNF541	5.77	1.97	-1.54942	0.235955	0.537224	0.269844
10715	CERS1	13.53	4.62	-1.54899	0.068212	0.251964	0.598662
8908	GYG2	28.79	9.84	-1.54836	0.00832315	0.0651605	1.18602
647024	C6orf132	319.71	109.41	-1.54701	1.27643e-05	0.00050369	3.29784
9388	LIPG	3204.55	1097.78	-1.54554	0.163034	0.435218	0.361293
4130	MAP1A	4941.93	1694.06	-1.54459	4.29411e-06	0.000208007	3.68192
100419008	PRR20G	1	0.34	-1.54441	0.619886	0.879146	0.0559388
84106	PRAM1	1	0.34	-1.54441	0.619886	0.879146	0.0559388
100526771	SMIM35	1.01	0.35	-1.54439	0.618972	0.878829	0.0560955
54514	DDX4	1.01	0.35	-1.54439	0.618972	0.878829	0.0560955
83483	PLVAP	1.02	0.35	-1.54436	0.618062	0.87793	0.0565401
57542	KLHL42	1263.34	433.49	-1.54317	7.9436e-10	1.1475e-07	6.94025
57125	PLXDC1	358.83	123.47	-1.53921	0.00429859	0.0417198	1.37966
9848	MFAP3L	233.03	80.19	-1.53898	0.00169319	0.0210401	1.67695
3589	IL11	6439.56	2217.96	-1.53773	0.17985	0.46224	0.335133
78986	DUSP26	1.01	0.35	-1.53534	0.621514	0.88034	0.0553498
84639	IL1F10	1.01	0.35	-1.53534	0.621514	0.88034	0.0553498
107987042	LOC107987042	1.01	0.35	-1.53533	0.620601	0.879528	0.0557501
56154	TEX15	1.01	0.35	-1.53533	0.620601	0.879528	0.0557501
10398	MYL9	4441.69	1532.52	-1.5352	4.4418e-06	0.000213246	3.67112
140862	ISM1	19.93	6.89	-1.53283	0.0435054	0.190134	0.720941
105373102	LOC105373102	27.63	9.55	-1.53268	0.0513139	0.211464	0.674764
113146	AHNAK2	1929.91	667.82	-1.531	1.57779e-05	0.000592969	3.22697
8869	ST3GAL5	160.11	55.45	-1.52979	5.28279e-06	0.000245604	3.60976
53919	SLCO1C1	0.99	0.34	-1.5287	0.624292	0.880979	0.0550344
6011	GRK1	0.99	0.34	-1.5287	0.624292	0.880979	0.0550344
113523638	SMIM41	1.01	0.35	-1.52868	0.622457	0.880462	0.0552892
23504	RIMBP2	1.01	0.35	-1.52868	0.622457	0.880462	0.0552892
7100	TLR5	1.01	0.35	-1.52868	0.622457	0.880462	0.0552892
8174	MADCAM1	1.01	0.35	-1.52868	0.622457	0.880462	0.0552892
838	CASP5	1.01	0.35	-1.52868	0.622457	0.880462	0.0552892
5345	SERPINF2	5.78	2.01	-1.52742	0.249472	0.554653	0.255978
4321	MMP12	46.6	16.17	-1.52732	0.00538866	0.0485905	1.31345
389199	LOC389199	0.99	0.34	-1.52661	0.677821	0.895974	0.0477044
50846	DHH	0.99	0.34	-1.52661	0.677821	0.895974	0.0477044
6700	SPRR2A	1	0.35	-1.5266	0.676913	0.895842	0.0477685
25791	NGEF	99.54	34.56	-1.526	0.0723025	0.261521	0.582494
1303	COL12A1	1986.45	689.98	-1.52557	3.22627e-10	5.06775e-08	7.29519
2701	GJA4	4.81	1.67	-1.52465	0.386042	0.700828	0.154388
2354	FOSB	68.67	23.87	-1.52414	0.0126504	0.0860699	1.06515
3680	ITGA9	166.91	58.11	-1.52216	0.00111987	0.0155122	1.80933
130540	FLACC1	4.77	1.66	-1.52157	0.287376	0.598849	0.222683
122060	SLAIN1	0.99	0.34	-1.51953	0.580581	0.850889	0.0701269
124842	TMEM132E	0.99	0.34	-1.51953	0.580581	0.850889	0.0701269
2263	FGFR2	0.99	0.35	-1.51952	0.5797	0.850272	0.0704422
51066	SSUH2	0.99	0.35	-1.51952	0.5797	0.850272	0.0704422
64577	ALDH8A1	0.99	0.35	-1.51952	0.5797	0.850272	0.0704422
6770	STAR	0.99	0.35	-1.51952	0.5797	0.850272	0.0704422
11341	SCRG1	1	0.35	-1.51952	0.578823	0.849952	0.0706054
2209	FCGR1A	1	0.35	-1.51952	0.578823	0.849952	0.0706054
27293	SMPDL3B	1	0.35	-1.51952	0.578823	0.849952	0.0706054
4033	IRAG2	1	0.35	-1.51952	0.578823	0.849952	0.0706054
27289	RND1	8.38	2.93	-1.5172	0.14674	0.408485	0.388824
7805	LAPTM5	213.92	74.79	-1.51612	0.0173165	0.105324	0.977471
4900	NRGN	0.98	0.34	-1.51038	0.629442	0.88205	0.0545068
84630	TTBK1	0.98	0.34	-1.51038	0.629442	0.88205	0.0545068
10344	CCL26	18.92	6.65	-1.50946	0.0457653	0.196872	0.705815
10018	BCL2L11	145.09	51.01	-1.50817	0.00033762	0.00647966	2.18845
8740	TNFSF14	4.63	1.63	-1.50741	0.280554	0.590795	0.228563
10468	FST	6834.97	2404.16	-1.5074	9.89126e-06	0.000409286	3.38797
2642	GCGR	3.76	1.32	-1.50663	0.358535	0.673878	0.171419
728464	METTL24	8.47	2.98	-1.50631	0.151169	0.415521	0.381407
2159	F10	3.76	1.32	-1.50511	0.312622	0.628972	0.201369
284759	SIRPB2	0.99	0.35	-1.50366	0.629477	0.88205	0.0545068
63923	TNN	0.99	0.35	-1.50366	0.629477	0.88205	0.0545068
8383	OR1A1	0.99	0.35	-1.50366	0.629477	0.88205	0.0545068
51127	TRIM17	0.97	0.34	-1.50363	0.63133	0.88205	0.0545068
340371	NRBP2	414.12	146.3	-1.50111	6.51346e-06	0.000292726	3.53354
8013	NR4A3	191.83	67.84	-1.4997	0.0193094	0.112867	0.947434
427	ASAH1	2541.73	898.88	-1.49961	7.45615e-12	1.74831e-09	8.75738
10942	PRSS21	3.77	1.33	-1.49949	0.40809	0.722917	0.140912
29799	YPEL1	35.64	12.61	-1.49906	0.022449	0.12507	0.902847
3199	HOXA2	3.74	1.32	-1.49879	0.304225	0.619001	0.208309
4185	ADAM11	3.73	1.32	-1.4966	0.295311	0.607895	0.216171
1581	CYP7A1	2.71	0.96	-1.49637	0.45732	0.761659	0.118239
100529241	HSPE1-MOB4	13.76	4.88	-1.49636	0.13414	0.386302	0.413073
375248	ANKRD36	101.06	35.83	-1.49585	0.0033535	0.035004	1.45588
54102	CLIC6	1300.86	461.3	-1.49569	0.000116042	0.00285159	2.54491
81607	NECTIN4	296.45	105.21	-1.49458	4.09222e-05	0.00126351	2.89842
283971	CLEC18C	0.98	0.35	-1.49441	0.632074	0.88205	0.0545068
100128569	C19orf71	0.97	0.35	-1.49438	0.633003	0.88205	0.0545068
5957	RCVRN	0.97	0.35	-1.49438	0.633003	0.88205	0.0545068
22874	PLEKHA6	3.76	1.33	-1.49424	0.417475	0.730304	0.136496
55103	RALGPS2	940.2	333.85	-1.49377	1.16526e-11	2.5137e-09	8.59969
79444	BIRC7	3.82	1.36	-1.49272	0.560813	0.836072	0.0777564
147111	NOTUM	15.57	5.53	-1.49267	0.0613746	0.235974	0.627135
100272147	CMC4	64.04	22.76	-1.49235	0.00553029	0.0494061	1.30622
93953	GCNA	16.6	5.91	-1.49054	0.0484042	0.203358	0.691739
255809	C19orf38	42.65	15.19	-1.48929	0.00593628	0.0519714	1.28424
7092	TLL1	13.88	4.94	-1.4891	0.0660884	0.24751	0.606407
25960	ADGRA2	2006.86	715.09	-1.48875	0.000916349	0.0134901	1.86998
283848	CES4A	45.08	16.07	-1.48796	0.00609862	0.0528492	1.27696
22866	CNKSR2	6.42	2.29	-1.48712	0.230713	0.531196	0.274745
149647	FAM71A	7.52	2.69	-1.48594	0.280068	0.589941	0.229191
51013	EXOSC1	194.08	69.31	-1.48544	2.17105e-08	2.20914e-06	5.65578
338322	NLRP10	13.5	4.83	-1.48244	0.189112	0.476654	0.321797
2979	GUCA1B	9.1	3.26	-1.48151	0.118214	0.358363	0.445677
51014	TMED7	3927.08	1406.53	-1.48132	1.26519e-14	4.99258e-12	11.3017
64218	SEMA4A	21.11	7.56	-1.48109	0.0354306	0.167541	0.775879
100528021	ST20-MTHFS	2.66	0.96	-1.47856	0.518215	0.809364	0.0918561
56139	PCDHA10	5.45	1.96	-1.47826	0.2763	0.586033	0.232078
169981	SPIN3	123.71	44.41	-1.47789	6.69647e-06	0.000299288	3.52391
1285	COL4A3	6.39	2.3	-1.47624	0.230064	0.530685	0.275163
3903	LAIR1	0.97	0.35	-1.47607	0.688591	0.902057	0.0447662
4168	MCF2	0.97	0.35	-1.47607	0.688591	0.902057	0.0447662
6299	SALL1	0.97	0.35	-1.47607	0.688591	0.902057	0.0447662
7368	UGT8	0.97	0.35	-1.47607	0.688591	0.902057	0.0447662
2020	EN2	0.96	0.35	-1.47603	0.689482	0.902439	0.044582
27290	SPINK4	0.96	0.35	-1.47603	0.689482	0.902439	0.044582
83716	CRISPLD2	1513.24	544.47	-1.47473	0.103358	0.329307	0.482399
114908	TMEM123	1938.16	697.49	-1.47445	1.80766e-13	5.73455e-11	10.2415
79895	ATP8B4	58	20.89	-1.47364	0.00282011	0.031008	1.50853
283554	GPR137C	10.03	3.62	-1.47202	0.111005	0.34397	0.463479
83849	SYT15	20.9	7.54	-1.47025	0.0219151	0.122985	0.910149
223117	SEMA3D	9.18	3.31	-1.47003	0.15921	0.428809	0.367736
864	RUNX3	110.42	39.99	-1.46533	0.0710451	0.258591	0.587386
10008	KCNE3	6.42	2.33	-1.46525	0.252919	0.558632	0.252875
151742	PPM1L	40.59	14.71	-1.46461	0.00592195	0.0519021	1.28482
1999	ELF3	152.39	55.25	-1.46365	0.0188999	0.111355	0.95329
29767	TMOD2	178.34	64.66	-1.46365	0.00538253	0.0485905	1.31345
120	ADD3	6130.56	2224.78	-1.46236	2.13613e-09	2.75507e-07	6.55987
57214	CEMIP	2242.57	813.93	-1.46217	0.000279881	0.0055766	2.25363
54567	DLL4	6.46	2.35	-1.46074	0.32972	0.646218	0.189621
3779	KCNMB1	97.48	35.42	-1.46067	0.00788887	0.0628739	1.20153
10625	IVNS1ABP	2178.46	791.69	-1.46031	3.04301e-05	0.00100067	2.99971
10878	CFHR3	2.74	1	-1.4601	0.418721	0.730835	0.13618
64072	CDH23	269.79	98.08	-1.45975	0.00145225	0.018808	1.72566
56127	PCDHB9	6.39	2.32	-1.45929	0.21602	0.513306	0.289624
80835	TAS1R1	3.67	1.34	-1.45672	0.380043	0.694769	0.158159
5724	PTAFR	8.09	2.95	-1.45614	0.142911	0.401696	0.396102
644168	DRGX	31.55	11.5	-1.45574	0.00941067	0.0703582	1.15269
9758	FRMPD4	64.64	23.56	-1.45569	0.0025141	0.0283257	1.54782
84181	CHD6	1445.93	527.84	-1.45382	9.8811e-09	1.09498e-06	5.9606
5209	PFKFB3	11348.9	4145.05	-1.45309	8.77465e-06	0.000370666	3.43102
133396	IL31RA	460.42	168.19	-1.45281	0.00124904	0.0168121	1.77438
2318	FLNC	6871.69	2512.22	-1.4517	1.08344e-05	0.000442651	3.35394
284346	ZNF575	5.36	1.96	-1.45142	0.250149	0.555488	0.255325
11136	SLC7A9	2.72	0.99	-1.45133	0.406701	0.722479	0.141175
163175	LGI4	82.23	30.07	-1.45114	0.000915859	0.0134901	1.86998
56975	FAM20C	3464.23	1270.25	-1.44743	0.00104608	0.0148461	1.82839
1028	CDKN1C	25.95	9.52	-1.44639	0.018106	0.108221	0.965689
5328	PLAU	17822.5	6540.82	-1.44616	1.12761e-07	9.35566e-06	5.02893
23524	SRRM2	7944.93	2915.79	-1.44615	4.95119e-07	3.16472e-05	4.49966
56936	CCDC177	2.71	0.99	-1.44574	0.417516	0.730304	0.136496
1036	CDO1	59.13	21.71	-1.44543	0.000362981	0.00686862	2.16313
9495	AKAP5	5.33	1.96	-1.44439	0.247341	0.552344	0.25779
3092	HIP1	678.87	249.53	-1.44395	1.23785e-07	1.01661e-05	4.99285
92340	PRR29	13.22	4.86	-1.44341	0.183511	0.467416	0.330297
166929	SGMS2	441.23	162.3	-1.4429	1.41228e-10	2.4402e-08	7.61258
200931	SLC51A	5.46	2.01	-1.44197	0.310066	0.626366	0.203172
5783	PTPN13	646.02	237.8	-1.44182	3.37348e-06	0.000167422	3.77619
57670	KIAA1549	115.59	42.55	-1.44166	3.23406e-06	0.000162496	3.78916
23336	SYNM	250.79	92.44	-1.43986	0.000647813	0.01046	1.98047
10085	EDIL3	627.47	231.33	-1.43956	0.00156447	0.0197747	1.70389
348938	NIPAL4	13.44	4.96	-1.43885	0.307166	0.623138	0.205416
5292	PIM1	868.96	320.57	-1.43866	1.83605e-05	0.000678205	3.16864
79846	CFAP69	106.47	39.3	-1.43784	6.40107e-05	0.0018136	2.74146
5786	PTPRA	2108.36	778.38	-1.43757	1.09161e-08	1.19333e-06	5.92324
5354	PLP1	2.73	1.01	-1.43084	0.476429	0.774899	0.110755
8608	RDH16	2.73	1.01	-1.4302	0.471391	0.77138	0.112731
8856	NR1I2	2.67	0.99	-1.43014	0.422874	0.733692	0.134486
149111	CNIH3	57.49	21.38	-1.4272	0.000929632	0.0136062	1.86626
85415	RHPN2	35.33	13.16	-1.42496	0.00930546	0.0700109	1.15483
80757	TMEM121	4.36	1.62	-1.42491	0.295978	0.608481	0.215753
1795	DOCK3	21.28	7.93	-1.42482	0.043409	0.189917	0.721435
10082	GPC6	2149.79	800.78	-1.42473	1.54844e-05	0.000585331	3.2326
140578	CHODL	4.3	1.6	-1.42456	0.368503	0.683206	0.165448
3791	KDR	96.14	35.83	-1.42402	0.00564275	0.050079	1.30034
57381	RHOJ	41.18	15.35	-1.4236	0.00523931	0.0477829	1.32073
255877	BCL6B	16.06	5.99	-1.42239	0.142824	0.401522	0.396291
283310	OTOGL	11.48	4.29	-1.42118	0.106076	0.335026	0.474922
6444	SGCD	199.14	74.58	-1.41698	0.00431091	0.0418143	1.37868
4082	MARCKS	6005.07	2251.5	-1.4153	1.48886e-11	3.08825e-09	8.51029
780776	TVP23A	35.13	13.19	-1.41382	0.228439	0.529043	0.276509
8470	SORBS2	677.86	254.45	-1.41361	1.34909e-09	1.80849e-07	6.74268
64757	MTARC1	4.32	1.62	-1.41339	0.418714	0.730835	0.13618
7461	CLIP2	2785.4	1048.25	-1.4099	2.03038e-08	2.10574e-06	5.67659
7105	TSPAN6	555.38	209.03	-1.40975	4.6359e-06	0.00021931	3.65894
169611	OLFML2A	106.23	39.99	-1.40938	0.01895	0.111447	0.952931
23129	PLXND1	1659.57	624.85	-1.40923	3.68405e-06	0.000182276	3.73927
5064	PALM	531.87	200.64	-1.40649	0.00128774	0.0171759	1.76508
80312	TET1	23.7	8.94	-1.40633	0.0349044	0.165558	0.781049
112609	MRAP2	8.68	3.28	-1.40462	0.156408	0.424159	0.372471
4155	MBP	174.79	66.05	-1.404	4.60229e-06	0.000218744	3.66006
23475	QPRT	71.83	27.18	-1.40221	0.0269041	0.139468	0.855524
7498	XDH	20.72	7.85	-1.40114	0.0377036	0.174089	0.759229
23135	KDM6B	1229.68	465.92	-1.40014	0.00131177	0.0173818	1.75991
100271927	RASA4B	143.64	54.44	-1.39982	0.00535317	0.0483849	1.31529
5286	PIK3C2A	1136.2	430.68	-1.39954	1.08018e-15	5.14006e-13	12.289
83394	PITPNM3	98.54	37.37	-1.39876	0.000128827	0.00309701	2.50906
199720	GGN	10.47	3.97	-1.39686	0.134759	0.387491	0.411738
389432	SAMD5	1.68	0.64	-1.39634	0.548107	0.825913	0.0830659
1362	CPD	5330.47	2026.68	-1.39514	2.10822e-16	1.17617e-13	12.9295
219736	STOX1	7.74	2.95	-1.39394	0.204401	0.498427	0.302398
59269	HIVEP3	155.85	59.54	-1.38835	0.000346989	0.00662021	2.17913
123103	KLHL33	3.42	1.31	-1.38823	0.425884	0.735287	0.133543
54959	ODAM	1.7	0.65	-1.38795	0.511315	0.804027	0.0947293
4355	MPP2	354.55	135.57	-1.38694	0.00153336	0.0194977	1.71002
171222	UBE2L5	1.67	0.64	-1.38599	0.596015	0.861592	0.0646986
84159	ARID5B	4178.62	1599.73	-1.3852	2.31296e-07	1.66317e-05	4.77906
51334	PRR16	466.34	178.77	-1.3833	4.90783e-09	5.9702e-07	6.22401
9314	KLF4	1051.84	403.28	-1.38308	6.11385e-06	0.000277854	3.55618
84072	HORMAD1	32.77	12.57	-1.38266	0.0127597	0.0865935	1.06251
5452	POU2F2	2395.17	918.81	-1.3823	5.52131e-08	5.04685e-06	5.29698
1261	CNGA3	214.16	82.2	-1.38147	0.382997	0.697884	0.156217
5360	PLTP	2420.73	929.46	-1.38098	0.00328679	0.0345081	1.46208
116328	C8orf34	15.35	5.9	-1.38066	0.131078	0.38133	0.418699
65267	WNK3	115.41	44.35	-1.37958	3.4994e-05	0.00111831	2.95144
154043	CNKSR3	39.81	15.32	-1.37827	0.0440306	0.1916	0.717604
494513	PJVK	20.58	7.92	-1.3781	0.0676496	0.250534	0.601133
119467	CLRN3	1.69	0.65	-1.37785	0.514693	0.806823	0.0932217
7504	XK	1.66	0.64	-1.37776	0.55413	0.830639	0.0805877
122622	ADSS1	71.1	27.38	-1.37657	0.00412366	0.0406066	1.3914
64409	GALNT17	23.66	9.14	-1.37247	0.0608907	0.234955	0.629015
1428	CRYM	6.71	2.59	-1.37205	0.254201	0.560544	0.25139
23382	AHCYL2	245.17	94.82	-1.37052	2.84514e-06	0.00014521	3.838
57480	PLEKHG1	4.99	1.93	-1.36973	0.354941	0.671098	0.173214
402415	XKRX	1.7	0.66	-1.36804	0.510418	0.803312	0.0951157
220382	FAM181B	1.7	0.66	-1.36733	0.61419	0.875351	0.0578177
6359	CCL15	1.7	0.66	-1.36729	0.659241	0.886559	0.0522921
390205	LRRC10B	6.8	2.64	-1.36552	0.205405	0.499736	0.30126
220004	PPP1R32	3.39	1.31	-1.36537	0.355061	0.671123	0.173198
117247	SLC16A10	6.82	2.65	-1.36421	0.221628	0.51967	0.284272
113	ADCY7	942.05	366.16	-1.36333	5.50154e-05	0.0016213	2.79014
643314	KIAA0754	263.88	102.68	-1.36172	0.00310433	0.0331737	1.47921
126669	SHE	3.37	1.31	-1.36086	0.447295	0.752981	0.123216
56990	CDC42SE2	1161.76	452.37	-1.36073	2.92751e-09	3.72946e-07	6.42835
3952	LEP	227.11	88.53	-1.3591	7.06292e-07	4.2959e-05	4.36695
23566	LPAR3	1.68	0.66	-1.35773	0.566981	0.840883	0.0752647
23341	DNAJC16	797.59	311.33	-1.35722	1.88216e-12	5.07524e-10	9.29454
4602	MYB	24.41	9.54	-1.35563	0.0451585	0.194936	0.710108
51458	RHCG	50.76	19.84	-1.35563	0.0151419	0.096792	1.01416
9945	GFPT2	14363.1	5613.47	-1.3554	8.94332e-05	0.00232291	2.63397
596	BCL2	141.92	55.52	-1.35407	6.20651e-06	0.000281275	3.55087
3949	LDLR	3999.53	1565.35	-1.35334	0.00130376	0.0173137	1.76161
4929	NR4A2	90.32	35.36	-1.35296	0.00306983	0.0329137	1.48262
2028	ENPEP	5.1	2	-1.35241	0.291955	0.603725	0.219161
7512	XPNPEP2	62.66	24.56	-1.3513	0.0180643	0.108064	0.96632
4166	CHST6	38.8	15.22	-1.35066	0.0590709	0.230236	0.637828
23604	DAPK2	325.6	127.67	-1.35064	0.000199638	0.00434132	2.36238
1896	EDA	1.67	0.66	-1.34989	0.561165	0.83631	0.0776329
3071	NCKAP1L	1.67	0.66	-1.34989	0.561165	0.83631	0.0776329
150	ADRA2A	125.83	49.39	-1.34928	0.0580457	0.227356	0.643293
5583	PRKCH	62.42	24.52	-1.34821	0.0032448	0.034245	1.4654
57519	STARD9	272.11	106.9	-1.34788	0.000141232	0.00335893	2.4738
284654	RSPO1	1.72	0.68	-1.3478	0.603338	0.866909	0.0620264
26232	FBXO2	113.64	44.65	-1.34753	0.00587754	0.0516247	1.28714
5197	PF4V1	65.94	25.92	-1.34706	0.00450561	0.0430745	1.36578
51621	KLF13	2995.25	1178.01	-1.34633	1.06706e-11	2.36242e-09	8.62664
153	ADRB1	6.83	2.69	-1.3463	0.330283	0.646618	0.189352
10683	DLL3	1.67	0.66	-1.34537	0.52479	0.813996	0.089378
83650	SLC35G5	1.67	0.66	-1.34537	0.52479	0.813996	0.089378
90952	ESAM	1.67	0.66	-1.34537	0.52479	0.813996	0.089378
8754	ADAM9	5763.77	2270.41	-1.34406	5.47802e-19	5.21347e-16	15.2829
112268260	LOC112268260	9.25	3.65	-1.34327	0.2217	0.519715	0.284235
440193	CCDC88C	7.32	2.89	-1.34303	0.312884	0.629386	0.201083
644596	SMIM10L2B	10.08	3.97	-1.34298	0.14845	0.41091	0.386253
3091	HIF1A	34602.6	13643.4	-1.34268	1.98605e-08	2.07305e-06	5.68339
114805	GALNT13	10.14	4	-1.34223	0.268093	0.578329	0.237825
4222	MEOX1	37.45	14.78	-1.3417	0.0782394	0.276263	0.558678
1944	EFNA3	52.92	20.88	-1.34157	0.0100336	0.0735871	1.1332
23236	PLCB1	84.06	33.2	-1.34017	0.0370546	0.172216	0.763927
1133	CHRM5	1.66	0.66	-1.3391	0.564694	0.838383	0.0765578
79901	CYBRD1	4236.14	1675.46	-1.33819	2.45514e-07	1.74986e-05	4.757
7216	TRO	154	60.95	-1.33727	0.000641928	0.0103961	1.98313
9340	GLP2R	5.69	2.25	-1.33587	0.308321	0.624478	0.204483
7850	IL1R2	3.41	1.35	-1.33562	0.462126	0.76523	0.116208
10071	MUC12	1.67	0.66	-1.33176	0.566131	0.840006	0.0757175
929	CD14	47.96	19.05	-1.33162	0.00748119	0.0607317	1.21658
57393	CLTRN	4.04	1.61	-1.33047	0.380115	0.694823	0.158126
57413	TMIGD3	1.65	0.65	-1.32938	0.576099	0.84834	0.0714302
83999	KREMEN1	1268.14	505.01	-1.32831	1.8405e-05	0.000678301	3.16858
79085	SLC25A23	167.95	66.94	-1.32716	0.00051687	0.00895336	2.04801
100129583	FAM47E	7.36	2.94	-1.32616	0.286483	0.598285	0.223092
92815	H2AW	62.11	24.8	-1.32457	0.00846092	0.0658755	1.18128
5027	P2RX7	379.42	151.51	-1.32442	0.000245789	0.00506732	2.29522
23526	ARHGAP45	19.9	7.95	-1.32382	0.137175	0.391777	0.406961
123803	NTAN1	744.51	297.42	-1.3238	7.79627e-07	4.6717e-05	4.33053
8214	DGCR6	4.11	1.64	-1.32315	0.518931	0.810232	0.0913908
139818	DOCK11	300.89	120.3	-1.32262	8.14655e-06	0.000352414	3.45295
139065	SLITRK4	211.33	84.53	-1.32196	0.0173717	0.105422	0.977067
55966	AJAP1	5.7	2.28	-1.3217	0.365969	0.681281	0.166674
6355	CCL8	13651.2	5465.29	-1.32066	0.146603	0.408451	0.38886
54329	GPR85	58.55	23.48	-1.3182	0.0505961	0.20952	0.678775
7903	ST8SIA4	9.67	3.88	-1.31794	0.251634	0.557163	0.254018
51655	RASD1	253.83	101.83	-1.31765	0.0151308	0.0967594	1.01431
400499	LOC400499	5.78	2.32	-1.31738	0.342526	0.659337	0.180892
5287	PIK3C2B	5.7	2.29	-1.317	0.245709	0.550439	0.259291
168667	BMPER	142.48	57.2	-1.31669	0.00583028	0.0512374	1.29041
1071	CETP	8.2	3.3	-1.31363	0.212049	0.50856	0.293658
149628	PYHIN1	1.65	0.66	-1.31234	0.580618	0.850889	0.0701269
5332	PLCB4	818.36	329.83	-1.31101	7.95149e-05	0.00213933	2.66972
10231	RCAN2	15.42	6.22	-1.31066	0.0838188	0.28884	0.539343
3696	ITGB8	10899.3	4400.59	-1.30846	0.0018868	0.022775	1.64254
3613	IMPA2	568.06	229.51	-1.3075	0.00149932	0.0192386	1.71583
116444	GRIN3B	4.06	1.64	-1.30685	0.342885	0.659653	0.180684
163933	FAM43B	36.41	14.72	-1.30679	0.00800792	0.063541	1.19695
25907	TMEM158	1301.67	526.26	-1.30651	5.74307e-05	0.00165847	2.78029
340481	ZDHHC21	456.97	184.76	-1.30647	3.91609e-05	0.00121609	2.91503
4693	NDP	206.03	83.33	-1.3059	0.00671826	0.0564942	1.248
8556	CDC14A	80.82	32.73	-1.30413	0.00196538	0.0234844	1.62922
339366	ADAMTSL5	55.87	22.65	-1.3024	0.00102082	0.0146028	1.83556
23630	KCNE5	14.57	5.91	-1.30046	0.0871322	0.296255	0.528335
157753	TMEM74	4.04	1.64	-1.30003	0.336538	0.653329	0.184868
5727	PTCH1	80.4	32.66	-1.29981	0.000787909	0.0121175	1.91659
145873	MESP2	9.76	3.96	-1.29944	0.150693	0.414778	0.382185
93986	FOXP2	68.87	27.98	-1.29943	0.00183373	0.0222399	1.65287
624	BDKRB2	4763.21	1935.39	-1.29931	3.2321e-07	2.2252e-05	4.65263
23243	ANKRD28	1266.95	514.88	-1.29905	2.97721e-13	8.92005e-11	10.0496
2957	GTF2A1	1417.77	576.31	-1.29872	6.38971e-12	1.54297e-09	8.81164
10512	SEMA3C	26861.7	10925.4	-1.29786	8.65114e-11	1.5381e-08	7.81302
5239	PGM5	6.37	2.59	-1.29759	0.303053	0.617978	0.209027
25836	NIPBL	1455.91	593.42	-1.2948	1.26808e-08	1.35869e-06	5.86688
101927423	PANO1	10.52	4.3	-1.29195	0.143824	0.403352	0.394316
1829	DSG2	495.35	202.3	-1.29194	0.0116655	0.0808291	1.09243
2121	EVC	871.89	356.16	-1.2916	7.40104e-09	8.4923e-07	6.07097
389084	SNORC	4.06	1.66	-1.29151	0.341792	0.658467	0.181466
170691	ADAMTS17	18.71	7.65	-1.29116	0.134768	0.387491	0.411738
107985678	LOC107985678	2.39	0.98	-1.29048	0.496396	0.791562	0.101515
90668	CARMIL3	25.57	10.46	-1.28925	0.244835	0.549299	0.260191
10675	CSPG5	149.12	61.02	-1.2892	0.0385069	0.176047	0.75437
91851	CHRDL1	33.36	13.65	-1.28901	0.064499	0.243474	0.613548
6451	SH3BGRL	1715.13	702.18	-1.2884	3.8089e-06	0.000187878	3.72612
340527	NHSL2	4.74	1.94	-1.28804	0.443783	0.74995	0.124968
23371	TNS2	886.37	363.13	-1.28741	6.43892e-05	0.00181682	2.74069
10069	RWDD2B	391.13	160.37	-1.28625	7.9151e-06	0.000345171	3.46197
10079	ATP9A	654.81	268.78	-1.28464	5.59902e-05	0.00164144	2.78477
255394	TCP11L2	170.6	70.24	-1.28031	0.000516713	0.00895336	2.04801
79007	DBNDD1	15.06	6.2	-1.28031	0.0900353	0.30184	0.520223
7852	CXCR4	93.44	38.57	-1.27655	0.0320709	0.156484	0.805531
80034	CSRNP3	1.63	0.68	-1.2759	0.682028	0.89865	0.0464093
343450	KCNT2	33.71	13.93	-1.27466	0.066839	0.248824	0.604108
730005	SEC14L6	2.34	0.97	-1.27291	0.486562	0.784151	0.1056
84968	PNMA6A	47.92	19.85	-1.27134	0.0133121	0.0889193	1.051
55607	PPP1R9A	4.69	1.94	-1.27122	0.339057	0.656016	0.183086
100507050	TPBGL	18.39	7.63	-1.27042	0.109944	0.342404	0.465461
493	ATP2B4	4049.22	1678.85	-1.27017	5.71899e-05	0.00165847	2.78029
4129	MAOB	378.97	157.2	-1.2695	0.324027	0.641434	0.192848
3087	HHEX	10.27	4.26	-1.26922	0.207997	0.503008	0.298425
9545	RAB3D	132.4	54.95	-1.2688	0.000207474	0.00444012	2.35261
90139	TSPAN18	13.47	5.6	-1.26627	0.158723	0.428104	0.36845
91526	ANKRD44	556.99	231.97	-1.26369	3.31063e-05	0.00107556	2.96837
441282	AKR1B15	13.3	5.55	-1.26141	0.145165	0.405704	0.391791
24	ABCA4	4.72	1.97	-1.2609	0.338805	0.655764	0.183252
130026	ICA1L	22.18	9.27	-1.25831	0.0601011	0.23324	0.632198
128497	SPATA25	7.09	2.96	-1.25765	0.230252	0.530685	0.275163
158358	KIAA2026	658.71	275.59	-1.25713	2.94221e-06	0.000149692	3.8248
2162	F13A1	7.04	2.94	-1.25708	0.260182	0.567852	0.245765
1298	COL9A2	7.08	2.96	-1.25631	0.218858	0.51683	0.286652
9389	SLC22A14	4.72	1.98	-1.25542	0.351069	0.667976	0.175239
10335	IRAG1	4.75	1.99	-1.25485	0.391091	0.70668	0.150777
731	C8A	4.67	1.96	-1.25428	0.335028	0.652277	0.185568
4072	EPCAM	15.38	6.45	-1.25397	0.151267	0.415649	0.381273
11069	RAPGEF4	30.59	12.83	-1.25384	0.043982	0.191492	0.717849
9839	ZEB2	4683.26	1964.4	-1.25342	1.60455e-07	1.25544e-05	4.9012
10225	CD96	2.37	0.99	-1.25127	0.485072	0.782841	0.106326
3208	HPCA	4.84	2.03	-1.24925	0.539296	0.820089	0.0861393
220	ALDH1A3	7103.63	2989.61	-1.2486	0.00118479	0.0161899	1.79076
25999	CLIP3	869.21	365.92	-1.24816	0.000724339	0.0113228	1.94605
56103	PCDHGB2	88.14	37.13	-1.24717	0.00738514	0.0603566	1.21928
280664	WFDC10B	5.42	2.28	-1.24638	0.290255	0.601366	0.220861
643988	FNDC10	211.9	89.32	-1.24625	0.00058085	0.00966828	2.01465
9926	LPGAT1	1340.45	566.42	-1.24276	1.87246e-07	1.40252e-05	4.85309
5226	PGD	4236.92	1792	-1.24145	1.54494e-11	3.12444e-09	8.50523
3736	KCNA1	211.88	89.62	-1.24128	0.00454845	0.0432116	1.3644
27177	IL36B	547.69	231.69	-1.24118	0.0212616	0.120642	0.918503
5913	RAPSN	2.4	1.01	-1.24115	0.545367	0.823808	0.0841738
6357	CCL13	71.34	30.18	-1.24093	0.0646426	0.243789	0.612986
84419	C15orf48	21731.4	9194.85	-1.24088	6.39744e-06	0.000288313	3.54014
7915	ALDH5A1	26.28	11.12	-1.24067	0.0264899	0.138251	0.85933
388662	SLC6A17	14.02	5.94	-1.2396	0.176746	0.457604	0.33951
4772	NFATC1	606.22	256.88	-1.23877	0.00643763	0.054847	1.26085
11279	KLF8	93.25	39.51	-1.23869	0.00958712	0.0712167	1.14742
2200	FBN1	24460.1	10368.9	-1.23816	0.00023913	0.00499813	2.30119
1755	DMBT1	2.39	1.01	-1.23743	0.543653	0.822702	0.0847575
6297	SALL2	37.29	15.82	-1.23736	0.0149217	0.0960421	1.01754
655	BMP7	23.38	9.92	-1.23634	0.08459	0.290693	0.536566
97	ACYP1	46.52	19.79	-1.23301	0.00699112	0.0581539	1.23542
57821	CCDC181	5.42	2.31	-1.23184	0.295346	0.607895	0.216171
5549	PRELP	536.02	228.23	-1.23179	0.001136	0.0156821	1.8046
389333	PROB1	42.56	18.13	-1.23148	0.00762662	0.0613581	1.21213
55223	TRIM62	187.96	80.13	-1.23001	8.15236e-05	0.00218735	2.66008
57484	RNF150	151.03	64.42	-1.22934	0.0315202	0.154769	0.810315
1462	VCAN	7783.39	3322.97	-1.22792	0.00163143	0.0204295	1.68974
534	ATP6V1G2	4.64	1.98	-1.2269	0.368571	0.683216	0.165442
8820	HESX1	3.06	1.31	-1.22642	0.420665	0.732485	0.135201
9590	AKAP12	1468.62	628.44	-1.22463	5.95168e-07	3.70355e-05	4.43138
527	ATP6V0C	2486.27	1064.14	-1.22429	4.0347e-06	0.000197213	3.70507
1840	DTX1	2.36	1.01	-1.22392	0.548387	0.82618	0.0829252
56125	PCDHB11	3	1.29	-1.22284	0.470154	0.770678	0.113127
57562	CEP126	185.46	79.47	-1.22258	0.00294555	0.03207	1.4939
84612	PARD6B	16.7	7.16	-1.2213	0.116519	0.35482	0.449992
85320	ABCC11	11.42	4.9	-1.22091	0.137859	0.392968	0.405643
79865	TREML2	2.36	1.01	-1.22058	0.542082	0.822041	0.0851063
56111	PCDHGA4	67.44	28.94	-1.22039	0.0384893	0.176047	0.75437
55534	MAML3	44.11	18.94	-1.22005	0.0357055	0.168232	0.774091
10900	RUNDC3A	3.06	1.32	-1.21931	0.455449	0.759818	0.11929
92749	DRC1	3.04	1.31	-1.21811	0.423802	0.734244	0.134159
161502	CFAP161	8.46	3.64	-1.21737	0.227674	0.527878	0.277467
54988	ACSM5	105.37	45.34	-1.2165	0.00125433	0.0168413	1.77362
197407	ZNF48	151.86	65.35	-1.21646	2.44291e-05	0.000848432	3.07138
84959	UBASH3B	252.25	108.62	-1.21563	0.000980153	0.0141842	1.8482
57493	HEG1	6806.73	2933.45	-1.21436	2.83502e-05	0.000947681	3.02334
9127	P2RX6	36.98	15.94	-1.2142	0.0215243	0.121593	0.915092
4751	NEK2	17.23	7.43	-1.21347	0.243172	0.546844	0.262136
79670	TUT7	1726.18	744.44	-1.21335	1.98665e-11	3.91975e-09	8.40674
53905	DUOX1	3.06	1.32	-1.2112	0.426408	0.735721	0.133287
9398	CD101	3.06	1.32	-1.20998	0.476969	0.775098	0.110643
64005	MYO1G	39.59	17.14	-1.20789	0.0407297	0.182355	0.739083
340152	ZC3H12D	12.13	5.25	-1.20753	0.199504	0.491815	0.308198
7462	LAT2	18.05	7.82	-1.20709	0.110177	0.342601	0.465211
26959	HBP1	2838.04	1229.75	-1.20653	1.2137e-10	2.13439e-08	7.67073
60494	CCDC81	9.83	4.26	-1.2058	0.188156	0.475206	0.323118
4008	LMO7	1735.19	754.53	-1.20145	8.95913e-05	0.00232291	2.63397
10096	ACTR3	6490.84	2822.85	-1.20125	5.74738e-14	1.97844e-11	10.7037
23380	SRGAP2	941.38	409.52	-1.20086	4.72464e-05	0.00143684	2.84259
190	NR0B1	16.65	7.25	-1.20001	0.195047	0.485412	0.313889
80128	TRIM46	63.76	27.77	-1.19919	0.0935157	0.308538	0.510691
1282	COL4A1	12466.1	5429.92	-1.199	0.00214143	0.0250653	1.60093
56894	AGPAT3	3226.19	1405.94	-1.1983	9.55871e-09	1.07396e-06	5.96901
83595	SOX7	3.01	1.31	-1.19754	0.470412	0.770726	0.1131
79937	CNTNAP3	3.06	1.33	-1.19737	0.481584	0.77956	0.10815
7869	SEMA3B	109.61	47.87	-1.19511	0.00527237	0.0478685	1.31995
3373	HYAL1	75.39	32.93	-1.19495	0.0564243	0.223633	0.650465
221223	CES5A	3.07	1.34	-1.19427	0.473844	0.773126	0.11175
57709	SLC7A14	30.84	13.48	-1.19423	0.212804	0.509662	0.292718
84909	AOPEP	1557.88	680.88	-1.19411	6.08775e-11	1.13211e-08	7.94611
285386	TPRG1	54.68	23.92	-1.19276	0.00680403	0.0570375	1.24384
6655	SOS2	787.34	344.81	-1.19119	3.33853e-07	2.28178e-05	4.64173
5324	PLAG1	187.94	82.37	-1.1901	1.32251e-06	7.42949e-05	4.12904
158880	USP51	76.6	33.63	-1.18748	0.00253766	0.0285513	1.54437
347475	CCDC160	3.05	1.34	-1.18659	0.4702	0.770678	0.113127
55283	MCOLN3	7.44	3.27	-1.18613	0.239553	0.54244	0.265649
5321	PLA2G4A	1083.65	476.56	-1.18516	1.17279e-05	0.000474365	3.32389
8193	DPF1	3.71	1.63	-1.18376	0.465737	0.768501	0.114355
155368	METTL27	40.52	17.84	-1.18329	0.0434228	0.189926	0.721415
2182	ACSL4	12618.2	5559.67	-1.18243	9.80896e-06	0.000406921	3.39049
55214	P3H2	1050.24	463.08	-1.18137	0.00973206	0.0718645	1.14349
23193	GANAB	11460	5053.95	-1.18112	6.67449e-10	9.81696e-08	7.00802
8569	MKNK1	340.29	150.08	-1.18103	2.73155e-08	2.66227e-06	5.57475
9644	SH3PXD2A	8020.78	3539.95	-1.18001	0.000206625	0.00443368	2.35324
92162	TMEM88	16.43	7.26	-1.17801	0.196475	0.48769	0.311856
222183	SRRM3	11.03	4.88	-1.17736	0.182524	0.466222	0.331407
4288	MKI67	162.46	71.87	-1.17661	0.061069	0.235358	0.62827
6249	CLIP1	3624.06	1604.55	-1.17544	2.08961e-08	2.15336e-06	5.66688
84915	FAM222A	3.66	1.62	-1.17544	0.406834	0.722479	0.141175
8600	TNFSF11	2.97	1.32	-1.17407	0.473698	0.773005	0.111817
57190	SELENON	3065.92	1358.95	-1.17383	1.61401e-07	1.25544e-05	4.9012
57864	SLC46A2	7.38	3.27	-1.17281	0.385541	0.700388	0.154661
219970	GLYATL2	7.38	3.27	-1.17254	0.285531	0.597156	0.223912
481	ATP1B1	356.66	158.27	-1.17222	9.39169e-05	0.00241571	2.61696
10529	NEBL	38.29	16.99	-1.17199	0.116802	0.355415	0.449265
286	ANK1	114.85	51.02	-1.17067	0.0191806	0.112441	0.949077
5837	PYGM	395.72	175.81	-1.17043	0.232249	0.533062	0.273223
5530	PPP3CA	1204.93	535.49	-1.17003	1.26745e-09	1.7232e-07	6.76366
80323	CCDC68	85.44	37.97	-1.17	0.00842599	0.0656983	1.18245
60468	BACH2	38.91	17.29	-1.16971	0.103227	0.329042	0.482749
11167	FSTL1	44895.1	19966.8	-1.16896	1.75409e-06	9.55538e-05	4.01975
4488	MSX2	666.29	296.35	-1.16885	0.000668798	0.0107133	1.97007
79822	ARHGAP28	1901.6	845.87	-1.1687	0.0124938	0.0852538	1.06929
10234	LRRC17	253.92	112.98	-1.16827	0.234197	0.535155	0.271521
89927	BMERB1	617.57	274.82	-1.16811	0.00033283	0.00641053	2.19311
9778	KIAA0232	786.5	350.04	-1.16795	8.01998e-10	1.14828e-07	6.93995
57534	MIB1	986.82	439.25	-1.16774	6.86411e-09	8.04742e-07	6.09434
146760	RTN4RL1	12.57	5.6	-1.16755	0.187994	0.474871	0.323424
51232	CRIM1	4009.12	1786.08	-1.16649	3.15228e-06	0.000159377	3.79757
114883	OSBPL9	1078.43	480.52	-1.16625	6.5453e-07	3.99609e-05	4.39836
2697	GJA1	16489.1	7349.63	-1.16577	1.60009e-06	8.86569e-05	4.05229
140462	ASB9	5.12	2.28	-1.16498	0.434297	0.741896	0.129657
50861	STMN3	38.11	17.01	-1.16358	0.0884873	0.298746	0.524698
205717	USF3	371.16	165.76	-1.1629	0.000106145	0.00266252	2.57471
340419	RSPO2	144.16	64.41	-1.16231	0.101981	0.326796	0.485723
100113407	TMEM170B	56.72	25.34	-1.16216	0.00364052	0.0371335	1.43023
64838	FNDC4	142.27	63.58	-1.16197	0.00094241	0.0137487	1.86174
57568	SIPA1L2	365.16	163.27	-1.16123	6.16745e-07	3.80852e-05	4.41924
93166	PRDM6	76.94	34.42	-1.16049	0.0851779	0.291904	0.53476
85449	KIAA1755	630.11	281.9	-1.16043	0.0104772	0.0758435	1.12008
26037	SIPA1L1	1427.38	638.94	-1.15961	1.65485e-07	1.2689e-05	4.89657
284904	SEC14L4	39.69	17.77	-1.15952	0.215578	0.512842	0.290017
94234	FOXQ1	116.11	51.99	-1.15932	0.062733	0.239038	0.621533
9472	AKAP6	4.42	1.98	-1.15844	0.37229	0.687589	0.162671
79872	CBLL1	629.86	282.28	-1.15791	3.19161e-08	3.07364e-06	5.51235
10257	ABCC4	813.81	364.89	-1.15721	0.000530511	0.00911161	2.0404
619279	ZNF704	23.14	10.38	-1.15654	0.099637	0.322534	0.491424
5613	PRKX	220.11	98.77	-1.15604	0.000258912	0.00523616	2.28099
157506	RDH10	183.27	82.39	-1.15344	1.27286e-05	0.000503512	3.29799
91646	TDRD12	4.34	1.95	-1.15333	0.420115	0.732124	0.135416
688	KLF5	346.64	155.88	-1.15303	5.45357e-05	0.00161304	2.79235
4885	NPTX2	48.59	21.87	-1.15195	0.257661	0.564537	0.248307
79930	DOK3	116.59	52.55	-1.1497	0.0449629	0.194299	0.71153
10544	PROCR	5127.21	2312.95	-1.14844	1.66609e-05	0.000622532	3.20584
2330	FMO5	69.48	31.34	-1.14838	0.00720964	0.0591757	1.22786
9980	DOP1B	344.63	155.49	-1.14825	0.000332783	0.00641053	2.19311
23460	ABCA6	122.41	55.26	-1.14734	0.000373441	0.00702547	2.15332
90990	KIFC2	113.07	51.14	-1.14475	0.000317713	0.00620806	2.20704
320	APBA1	323.15	146.18	-1.1445	0.000224029	0.0047318	2.32497
441250	TYW1B	106.81	48.32	-1.14433	0.109355	0.341397	0.46674
1759	DNM1	60.23	27.27	-1.14331	0.00326695	0.0343891	1.46358
51466	EVL	370.78	167.98	-1.14229	0.000866761	0.0129726	1.88697
23452	ANGPTL2	11541.9	5229.85	-1.14203	2.60697e-05	0.000893261	3.04902
388284	C16orf86	29.7	13.47	-1.14142	0.0361441	0.169304	0.771333
79953	SYNDIG1	19.7	8.93	-1.14101	0.169866	0.446946	0.349745
2060	EPS15	2144.44	972.39	-1.14099	1.70461e-07	1.29478e-05	4.8878
2852	GPER1	50.73	23.02	-1.13972	0.00622328	0.0536994	1.27003
2004	ELK3	3029.03	1374.95	-1.13948	6.17262e-10	9.1621e-08	7.038
10090	UST	533.08	242.15	-1.13845	1.9982e-07	1.46949e-05	4.83283
659	BMPR2	3580.32	1627.12	-1.13777	7.4067e-05	0.00202763	2.69301
161436	EML5	22.38	10.18	-1.13703	0.111064	0.34397	0.463479
11343	MGLL	7145.43	3249.63	-1.13675	0.000244968	0.00506174	2.2957
8452	CUL3	1266.82	576.29	-1.13635	4.20999e-08	3.98324e-06	5.39976
57458	TMCC3	56.53	25.72	-1.13614	0.0587941	0.229489	0.639239
4161	MC5R	16.61	7.57	-1.13486	0.304598	0.619341	0.20807
57167	SALL4	4.39	2	-1.13483	0.469323	0.770428	0.113268
54039	PCBP3	93.58	42.68	-1.13263	0.000355849	0.00674945	2.17073
25891	PAMR1	423.85	193.33	-1.13246	5.46168e-08	5.02071e-06	5.29923
23621	BACE1	1557.36	710.73	-1.13172	4.02034e-07	2.66579e-05	4.57417
124359	CDYL2	773.77	353.23	-1.13129	1.33953e-05	0.000524751	3.28005
7626	ZNF75D	172.69	78.95	-1.1291	0.00104895	0.0148738	1.82758
204851	HIPK1	1274.06	582.65	-1.12874	1.24301e-09	1.70429e-07	6.76846
728537	C2orf92	5.77	2.64	-1.12831	0.324383	0.64159	0.192742
79633	FAT4	235.06	107.54	-1.12811	0.0115344	0.0801611	1.09604
6493	SIM2	628.48	287.59	-1.12786	2.64884e-08	2.5973e-06	5.58548
79695	GALNT12	264.63	121.27	-1.12575	0.0466449	0.199121	0.700884
151306	GPBAR1	5.69	2.61	-1.12509	0.33698	0.653794	0.184559
25758	KIAA1549L	302.27	138.7	-1.12383	0.000730572	0.0114092	1.94275
3662	IRF4	43.09	19.78	-1.12375	0.498728	0.793253	0.100588
29903	CCDC106	145.99	67	-1.12364	5.41391e-05	0.0016071	2.79396
3937	LCP2	155.29	71.28	-1.12353	0.0326841	0.158464	0.800068
90865	IL33	5981.23	2745.28	-1.12349	0.0133167	0.0889193	1.051
54587	MXRA8	3239.06	1486.97	-1.1232	0.000545392	0.00927854	2.03252
6482	ST3GAL1	12796.9	5875.02	-1.12313	2.52171e-05	0.00086991	3.06053
9479	MAPK8IP1	148.36	68.15	-1.1224	0.000202254	0.00437651	2.35887
10106	CTDSP2	7170.53	3295.94	-1.12139	1.91138e-05	0.000694928	3.15806
3843	IPO5	10266	4722.59	-1.12022	2.60233e-07	1.83856e-05	4.73552
1116	CHI3L1	136291	62717.2	-1.11976	0.00199823	0.0237193	1.6249
114804	RNF157	34.82	16.04	-1.11774	0.107605	0.337849	0.471277
6582	SLC22A2	548.96	253.09	-1.11706	0.00146296	0.0188715	1.72419
286223	C9orf47	19.19	8.85	-1.11695	0.183872	0.46782	0.329922
2627	GATA6	110.58	51.06	-1.11493	0.00489202	0.0455432	1.34158
167681	PRSS35	6.37	2.94	-1.11366	0.420449	0.732311	0.135304
9469	CHST3	3852.77	1780.87	-1.11331	0.000128181	0.00309067	2.50995
94032	CAMK2N2	6.43	2.97	-1.11325	0.311107	0.627712	0.202239
8516	ITGA8	32.72	15.13	-1.11286	0.601414	0.86576	0.0626025
146198	ZFP90	406.72	188.15	-1.11215	0.000414262	0.0076163	2.11826
9306	SOCS6	2012.3	931.02	-1.11196	1.03385e-08	1.13787e-06	5.94391
55937	APOM	14.11	6.53	-1.11195	0.133429	0.385017	0.41452
100534592	URGCP-MRPS24	6.36	2.94	-1.11169	0.409718	0.724383	0.140032
8771	TNFRSF6B	60.19	27.89	-1.10947	0.0053591	0.0484114	1.31505
1778	DYNC1H1	10506.1	4870.06	-1.10922	0.000474444	0.00844443	2.07343
9911	TMCC2	45.42	21.08	-1.1077	0.0197172	0.114503	0.941185
23305	ACSL6	7.12	3.3	-1.10679	0.322356	0.639064	0.194455
3643	INSR	434.46	201.83	-1.10609	1.39846e-07	1.13697e-05	4.94425
9459	ARHGEF6	337.3	156.84	-1.10473	0.00709535	0.058689	1.23144
4627	MYH9	29379.5	13664.3	-1.1044	0.000308351	0.00607651	2.21635
6645	SNTB2	1966.29	914.56	-1.10432	0.000340022	0.00651803	2.18588
18	ABAT	570.2	265.66	-1.10188	0.00112365	0.0155513	1.80823
25924	MYRIP	5.64	2.63	-1.10162	0.357075	0.672706	0.172175
7148	TNXB	1410.4	657.49	-1.10107	0.00596975	0.0521467	1.28277
79875	THSD4	250.48	116.82	-1.10045	0.0044772	0.0428873	1.36767
220164	DOK6	355.98	166.04	-1.10026	0.00104038	0.0147911	1.83
57139	RGL3	5.74	2.68	-1.10004	0.46397	0.766846	0.115292
56126	PCDHB10	7.74	3.61	-1.0995	0.295044	0.607704	0.216308
23362	PSD3	2437.47	1137.97	-1.09892	4.31028e-07	2.81193e-05	4.55099
6785	ELOVL4	83.75	39.11	-1.09866	0.00196754	0.0234929	1.62906
84441	MAML2	1168.56	545.94	-1.09792	7.95736e-06	0.000346081	3.46082
219790	RTKN2	32.06	14.99	-1.097	0.100567	0.324146	0.489259
154743	BMT2	846.97	396	-1.09681	1.18515e-05	0.000478169	3.32042
158326	FREM1	8.47	3.96	-1.09679	0.237379	0.539329	0.268146
1044	CDX1	1.37	0.64	-1.09651	0.688079	0.902009	0.0447889
768206	PRCD	21.07	9.86	-1.09588	0.11611	0.354051	0.450934
115362	GBP5	68873.2	32228.4	-1.09561	0.00837409	0.0653882	1.1845
83648	FAM167A	89.02	41.66	-1.09523	0.0173511	0.105377	0.977255
1803	DPP4	20850.5	9764.33	-1.09449	1.78552e-09	2.32967e-07	6.63271
55118	CRTAC1	476.66	223.29	-1.09408	0.0318353	0.155823	0.807367
23361	ZNF629	772.68	362.02	-1.0938	2.12423e-07	1.54116e-05	4.81215
2549	GAB1	243.26	114.06	-1.09271	1.54077e-05	0.000583797	3.23374
122773	KLHDC1	51.19	24.01	-1.09246	0.0101027	0.0738464	1.13167
117289	TAGAP	1.36	0.64	-1.09195	0.693462	0.90429	0.0436922
1386	ATF2	816.89	383.31	-1.09162	2.28225e-08	2.30778e-06	5.63681
1690	COCH	18.32	8.6	-1.09119	0.147526	0.409743	0.387488
29121	CLEC2D	70.09	32.9	-1.09104	0.00421677	0.0411975	1.38513
27239	GPR162	7.84	3.68	-1.09089	0.331704	0.648615	0.188013
8840	CCN4	1654.23	776.78	-1.09058	0.0110588	0.0782335	1.10661
284716	RIMKLA	35.93	16.88	-1.08983	0.0558058	0.22222	0.653216
9143	SYNGR3	15.56	7.31	-1.08976	0.168944	0.445242	0.351404
166614	DCLK2	35.03	16.46	-1.08951	0.0249462	0.133555	0.874339
84230	LRRC8C	567.52	266.7	-1.08943	0.00126932	0.0169848	1.76994
56107	PCDHGA9	54.35	25.54	-1.08928	0.00843005	0.0656983	1.18245
115749	C12orf56	17.98	8.45	-1.08867	0.150025	0.413689	0.383326
84812	PLCD4	81.77	38.48	-1.08752	0.102114	0.326856	0.485643
57595	PDZD4	19.01	8.95	-1.08714	0.118558	0.359272	0.444576
85443	DCLK3	373.27	175.71	-1.08708	0.224385	0.523781	0.28085
50619	DEF6	2.04	0.96	-1.08695	0.607215	0.869777	0.0605921
286151	FBXO43	1.35	0.64	-1.08689	0.737783	0.924185	0.0342409
58508	KMT2C	1236.54	582.89	-1.085	3.90544e-06	0.000191473	3.71789
4293	MAP3K9	22.09	10.43	-1.0836	0.124666	0.370013	0.431783
55075	UACA	1059.46	499.93	-1.08353	0.000120471	0.00292657	2.53364
4756	NEO1	940.01	443.63	-1.08331	0.000116417	0.00285379	2.54458
727800	RNF208	67.15	31.69	-1.08325	0.0701578	0.25674	0.590506
148113	CILP2	12.51	5.9	-1.08274	0.162515	0.434529	0.361981
84329	HVCN1	19.45	9.19	-1.08227	0.0865223	0.29529	0.529751
24142	NAA80	69.28	32.72	-1.08217	0.00879947	0.0673766	1.17149
8912	CACNA1H	1.37	0.65	-1.08167	0.659394	0.886651	0.0522475
7042	TGFB2	690.78	326.4	-1.0816	7.69186e-05	0.00209154	2.67953
5172	SLC26A4	24.87	11.75	-1.08133	0.0895559	0.301044	0.52137
57452	GALNT16	51.68	24.44	-1.08043	0.0198118	0.114887	0.939728
23150	FRMD4B	9.1	4.32	-1.07639	0.34801	0.66465	0.177407
113451	AZIN2	240.72	114.16	-1.07629	0.0378623	0.174473	0.758272
26999	CYFIP2	57.88	27.45	-1.07619	0.0882676	0.298427	0.525162
164153	UBL4B	10.48	4.98	-1.07487	0.329588	0.646195	0.189636
4825	NKX6-1	1.34	0.64	-1.0728	0.695278	0.904933	0.0433836
79699	ZYG11B	831.5	395.45	-1.0722	4.09979e-06	0.000199191	3.70073
91584	PLXNA4	128.97	61.36	-1.07165	0.0616532	0.236427	0.626302
2150	F2RL1	2.03	0.97	-1.07164	0.614772	0.875718	0.057636
84690	SPATA22	1.34	0.64	-1.07126	0.699674	0.90509	0.0433084
131890	GRK7	1.36	0.65	-1.07039	0.663072	0.888287	0.0514468
387914	SHISA2	11.84	5.64	-1.07013	0.204859	0.499135	0.301782
4489	MT1A	48.43	23.07	-1.07011	0.144029	0.403716	0.393924
195827	PRXL2C	257.15	122.49	-1.06996	0.000104718	0.002639	2.57856
122402	TDRD9	72.94	34.74	-1.06986	0.0283576	0.144276	0.840805
80205	CHD9	1946.52	927.66	-1.06922	2.80175e-05	0.000940447	3.02667
284252	KCTD1	103.14	49.16	-1.06885	0.000348068	0.00663297	2.17829
3655	ITGA6	196.87	93.87	-1.0685	1.37613e-05	0.000533918	3.27253
12	SERPINA3	67.8	32.35	-1.06776	0.0216617	0.122028	0.913539
199920	FYB2	4.75	2.26	-1.06768	0.418684	0.730835	0.13618
5087	PBX1	778.73	371.71	-1.06694	0.0172193	0.105129	0.978278
5865	RAB3B	980.56	468.5	-1.06556	0.0138625	0.091134	1.04032
6372	CXCL6	31869.1	15228.4	-1.06539	0.00258306	0.0289614	1.53818
100529144	CORO7-PAM16	5.67	2.71	-1.06516	0.579998	0.850597	0.0702762
253832	ZDHHC20	3019.1	1444.5	-1.06354	1.87252e-05	0.000683873	3.16502
168002	DACT2	16.78	8.03	-1.06303	0.365447	0.680798	0.166981
11328	FKBP9	5651.42	2705.93	-1.06249	1.03685e-07	8.69177e-06	5.06089
4133	MAP2	144.96	69.42	-1.06217	0.00648973	0.0551457	1.25849
1399	CRKL	2298.45	1100.76	-1.06216	3.9889e-10	6.14633e-08	7.21138
26064	RAI14	7181.84	3440.83	-1.0616	7.92941e-12	1.8069e-09	8.74307
283748	PLA2G4D	1.35	0.65	-1.06151	0.629043	0.88205	0.0545068
5813	PURA	831.74	398.62	-1.0611	1.4104e-07	1.14079e-05	4.9428
64127	NOD2	1916.89	919.01	-1.06062	0.00972139	0.0718513	1.14357
6439	SFTPB	2.72	1.31	-1.06042	0.55198	0.829046	0.0814214
23432	GPR161	1164.22	558.25	-1.06038	7.42593e-08	6.41208e-06	5.193
5753	PTK6	2.7	1.3	-1.06016	0.528407	0.814742	0.0889798
221935	SDK1	3317.18	1591.65	-1.05943	0.00177038	0.0217157	1.66323
128229	TSACC	1.33	0.64	-1.05896	0.699484	0.90509	0.0433084
639	PRDM1	1089.81	523.26	-1.05849	3.59181e-05	0.00114169	2.94245
10144	FAM13A	702.41	337.27	-1.05841	0.00265076	0.0295159	1.52994
55749	CCAR1	1116.54	536.42	-1.05759	6.08589e-08	5.41009e-06	5.2668
100506127	GVQW3	17.89	8.6	-1.05759	0.183015	0.466838	0.330834
6258	RXRG	5.44	2.62	-1.05398	0.38051	0.694995	0.158018
54020	SLC37A1	196.85	94.82	-1.05377	0.00406438	0.040145	1.39637
80737	VWA7	2.03	0.98	-1.05369	0.576967	0.848907	0.0711398
54510	PCDH18	1059.95	510.77	-1.05325	0.010363	0.0751849	1.12387
9883	POM121	2140.68	1032.01	-1.05262	1.79794e-05	0.000667175	3.17576
9542	NRG2	6.1	2.94	-1.05236	0.365592	0.680815	0.166971
150356	CHADL	3.37	1.62	-1.05203	0.489925	0.787218	0.103905
22859	ADGRL1	76.67	36.99	-1.05164	0.00579632	0.0510647	1.29188
2155	F7	1.36	0.66	-1.05151	0.668343	0.890971	0.0501365
7078	TIMP3	18388.5	8874.65	-1.05104	0.00487142	0.0454525	1.34244
9249	DHRS3	691.7	333.95	-1.05052	0.00354093	0.0363047	1.44004
9369	NRXN3	4.06	1.96	-1.05002	0.495302	0.790519	0.102088
196441	ZFC3H1	627.69	303.4	-1.04882	5.23658e-05	0.00156604	2.8052
54332	GDAP1	144.63	69.93	-1.04831	0.000987056	0.0142428	1.8464
100170229	SRRM5	6.11	2.96	-1.04761	0.396216	0.71179	0.147648
51429	SNX9	4690.88	2270.34	-1.04695	7.22895e-10	1.05367e-07	6.9773
23287	AGTPBP1	235.88	114.19	-1.04657	0.00051585	0.00895336	2.04801
54798	DCHS2	2.72	1.31	-1.04653	0.529034	0.814974	0.0888564
781	CACNA2D1	754.63	365.43	-1.04615	0.000466211	0.00838092	2.07671
653820	FAM72B	18.83	9.12	-1.04613	0.124041	0.36911	0.432844
139735	ZFP92	18.95	9.18	-1.04609	0.193381	0.483051	0.316007
282809	POC1B	180.62	87.48	-1.04594	0.000863031	0.0129287	1.88845
7093	TLL2	2.67	1.29	-1.04543	0.52962	0.815387	0.0886363
121256	TMEM132D	4.03	1.95	-1.04538	0.418432	0.730786	0.13621
5671	PSG3	1.36	0.66	-1.04526	0.746791	0.924185	0.0342409
89958	SAPCD2	6.82	3.31	-1.04515	0.370279	0.684907	0.164368
1519	CTSO	1696.11	821.98	-1.04505	6.78009e-06	0.00030219	3.51972
387837	CLEC12B	1.34	0.65	-1.04471	0.634976	0.88205	0.0545068
283078	MKX	38.53	18.68	-1.04448	0.0283366	0.144214	0.840992
7694	ZNF135	104.25	50.55	-1.04427	0.000559478	0.00943322	2.02534
81035	COLEC12	432.09	209.53	-1.04418	0.00944634	0.0705597	1.15144
6602	SMARCD1	849.64	412.01	-1.04418	7.45084e-08	6.41208e-06	5.193
23177	CEP68	228.85	110.98	-1.04409	0.000499596	0.00874434	2.05827
57513	CASKIN2	154.82	75.08	-1.04403	0.00273296	0.0302025	1.51996
100507421	TMEM178B	12.08	5.86	-1.04324	0.232777	0.533809	0.272614
59084	ENPP5	8.21	3.98	-1.0425	0.331312	0.64821	0.188284
115207	KCTD12	3086.92	1498.99	-1.04217	0.000721117	0.0112833	1.94756
1536	CYBB	1.99	0.97	-1.04152	0.591559	0.858226	0.0663984
389610	XKR5	1.99	0.97	-1.04152	0.591559	0.858226	0.0663984
4810	NHS	157.88	76.72	-1.04119	0.0171278	0.10474	0.979886
100286986	LOC100286986	1.37	0.67	-1.04072	0.666365	0.890351	0.0504388
6334	SCN8A	422.07	205.19	-1.04048	0.00011615	0.00285159	2.54491
169834	ZNF883	27.44	13.35	-1.03975	0.106804	0.336117	0.47351
55790	CSGALNACT1	1363.64	663.97	-1.03828	2.21304e-05	0.000783475	3.10597
146223	CMTM4	256.76	125.09	-1.03747	0.00402784	0.0399794	1.39816
6854	SYN2	3.41	1.66	-1.03733	0.483216	0.781224	0.107224
150726	FBXO41	169.88	82.77	-1.03727	0.000831414	0.012595	1.8998
7837	PXDN	13597.3	6626.29	-1.03705	5.75068e-05	0.00165847	2.78029
54507	ADAMTSL4	479.23	233.54	-1.03704	0.0101054	0.0738464	1.13167
25769	SLC24A2	1.3	0.64	-1.03617	0.751215	0.924185	0.0342409
7103	TSPAN8	2.02	0.99	-1.03478	0.66785	0.890926	0.0501585
56099	PCDHGB7	423.77	206.84	-1.03476	0.00173149	0.0214009	1.66957
30845	EHD3	177.11	86.48	-1.03422	0.016348	0.101768	0.992391
3784	KCNQ1	1.37	0.67	-1.03412	0.673145	0.893302	0.0490015
10235	RASGRP2	1.34	0.66	-1.03297	0.709195	0.910712	0.0406189
260293	CYP4X1	1.34	0.66	-1.03297	0.709195	0.910712	0.0406189
54557	SGTB	463.83	226.73	-1.03259	0.00010813	0.00270393	2.568
100129543	ZNF730	2.01	0.98	-1.03147	0.55587	0.832261	0.0797402
389336	C5orf46	85.8	41.98	-1.03117	0.0933306	0.308309	0.511014
7851	MALL	24.17	11.83	-1.03059	0.0844069	0.290249	0.53723
84557	MAP1LC3A	786.15	385.12	-1.0295	0.00292996	0.0319432	1.49562
54207	KCNK10	1.34	0.66	-1.0294	0.639538	0.88205	0.0545068
2797	GNRH2	1.38	0.68	-1.02836	0.708728	0.910619	0.0406633
140730	RIMS4	6.11	2.99	-1.02789	0.42321	0.734029	0.134287
115399	LRRC56	18.19	8.92	-1.02786	0.128149	0.376215	0.424564
259290	TAS2R31	1.32	0.65	-1.02775	0.677005	0.895842	0.0477685
84073	MYCBPAP	6.81	3.34	-1.02687	0.403329	0.719218	0.14314
56892	TCIM	381.95	187.5	-1.02651	0.231394	0.532006	0.274084
2201	FBN2	75.36	37	-1.02611	0.0520125	0.213153	0.671309
4992	OR1F1	8.7	4.27	-1.0259	0.261843	0.569862	0.244231
9783	RIMS3	4.05	1.99	-1.02492	0.481924	0.77989	0.107967
57188	ADAMTSL3	46.92	23.06	-1.02491	0.0539971	0.217498	0.662545
3679	ITGA7	382.06	187.76	-1.02486	0.000570164	0.00954936	2.02003
112817	HOGA1	8.86	4.36	-1.02355	0.353895	0.670061	0.173886
120103	SLC36A4	366.2	180.23	-1.02281	8.58095e-05	0.00224646	2.6485
753	LDLRAD4	670.66	330.16	-1.02243	0.0299109	0.149638	0.824958
120892	LRRK2	348.62	171.71	-1.0217	2.87395e-05	0.000954778	3.0201
64753	CCDC136	46.21	22.76	-1.02168	0.0398918	0.180081	0.744533
100499483	CCDC180	14.82	7.3	-1.02158	0.248259	0.553503	0.25688
1735	DIO3	1.99	0.98	-1.02007	0.570022	0.843917	0.0737005
56144	PCDHA4	6.75	3.33	-1.01986	0.354187	0.670378	0.17368
79661	NEIL1	10.16	5.01	-1.0197	0.297763	0.610506	0.21431
23057	NMNAT2	31.19	15.39	-1.01908	0.131617	0.382167	0.417746
3371	TNC	135475	66852.1	-1.01898	0.00146386	0.0188715	1.72419
395	ARHGAP6	82.29	40.67	-1.01667	0.0223542	0.124713	0.904088
10261	IGSF6	1.37	0.68	-1.01649	0.7123	0.912527	0.0397543
245711	SPDYA	1.37	0.68	-1.01649	0.7123	0.912527	0.0397543
54734	RAB39A	3.38	1.67	-1.01622	0.520305	0.811185	0.09088
150786	RAB6D	1.35	0.67	-1.01616	0.679028	0.896693	0.0473563
340485	ACER2	66.66	32.99	-1.0146	0.0131397	0.0882108	1.05448
54492	NEURL1B	14.56	7.21	-1.0144	0.217453	0.515408	0.287849
6954	TCP11	1.34	0.66	-1.01378	0.644236	0.88205	0.0545068
2202	EFEMP1	7887.56	3906.82	-1.01359	0.0112925	0.0792283	1.10112
441027	TMEM150C	66.95	33.16	-1.01353	0.059815	0.232464	0.633644
6503	SLA	1.36	0.68	-1.01267	0.674808	0.894896	0.0482276
64795	RMND5A	383.65	190.18	-1.01242	3.33654e-06	0.000166611	3.7783
56967	C14orf132	1224.65	607.27	-1.01197	7.71574e-06	0.000337386	3.47187
6038	RNASE4	209.55	103.92	-1.01189	0.00523566	0.0477765	1.32079
283933	ZNF843	15.19	7.54	-1.01124	0.148732	0.411481	0.385651
5669	PSG1	305.27	151.59	-1.0099	0.0583212	0.228083	0.641907
10350	ABCA9	23.37	11.61	-1.0096	0.182632	0.46637	0.331269
8786	RGS11	14.72	7.31	-1.00919	0.25639	0.563102	0.249413
80212	CCDC92	774.91	385.09	-1.00883	5.25752e-05	0.00156651	2.80507
338376	IFNE	42.49	21.12	-1.00863	0.061409	0.235995	0.627098
4969	OGN	15.04	7.48	-1.00828	0.25099	0.556651	0.254417
23767	FLRT3	10.58	5.26	-1.00772	0.279051	0.588933	0.229934
22998	LIMCH1	564.29	280.7	-1.00742	0.0500563	0.20787	0.682209
11120	BTN2A1	3010.03	1497.59	-1.00713	2.89681e-07	2.0289e-05	4.69274
25959	KANK2	4460.79	2219.78	-1.00688	9.97384e-06	0.000410776	3.3864
11123	RCAN3	192.84	96.03	-1.00589	0.0073075	0.059832	1.22307
489	ATP2A3	859.53	428.13	-1.00552	0.000602588	0.00995839	2.00181
146562	DNAAF8	9.1	4.53	-1.00526	0.288497	0.600036	0.221823
200373	CFAP221	2.01	1	-1.00506	0.594493	0.860314	0.0653431
831	CAST	4212.88	2099.41	-1.00482	3.73574e-05	0.00117589	2.92963
81566	CSRNP2	1174.58	585.9	-1.00342	9.97805e-06	0.000410776	3.3864
139285	AMER1	252.98	126.22	-1.00316	0.00232575	0.0266694	1.57399
125113	KRT222	2.03	1.01	-1.00313	0.628451	0.88205	0.0545068
284	ANGPT1	750.59	374.48	-1.00312	0.00433543	0.0419515	1.37725
126432	RINL	11.79	5.88	-1.00262	0.199511	0.491815	0.308198
3572	IL6ST	15576.7	7776.45	-1.0022	3.72962e-07	2.5038e-05	4.6014
107	ADCY1	77.7	38.79	-1.00219	0.0822219	0.285772	0.54398
56109	PCDHGA6	49.81	24.87	-1.002	0.0245599	0.132187	0.87881
23213	SULF1	29973.4	14970.8	-1.00153	0.00769584	0.0617614	1.20928
729533	FAM72A	47.27	23.61	-1.00124	0.0394764	0.179005	0.747136
100129128	KHDC1L	0.23	0.12	-1.00015	0.806374	0.924185	0.0342409
100129654	TCF24	0.23	0.11	-1.00015	0.806374	0.924185	0.0342409
100130301	C8orf89	0.23	0.11	-1.00015	0.806374	0.924185	0.0342409
100131303	DPEP2NB	0.23	0.12	-1.00015	0.806374	0.924185	0.0342409
100190949	C5orf52	0.23	0.12	-1.00015	0.806374	0.924185	0.0342409
100289279	CNTNAP3C	0.23	0.11	-1.00015	0.806374	0.924185	0.0342409
1003	CDH5	0.23	0.12	-1.00015	0.806374	0.924185	0.0342409
100506540	SPTY2D1OS	0.22	0.11	-1.00015	0.806374	0.924185	0.0342409
100507096	GIMD1	0.22	0.11	-1.00015	0.806374	0.924185	0.0342409
100507650	RNF212B	0.22	0.11	-1.00015	0.806374	0.924185	0.0342409
100509620	LOC100509620	0.23	0.11	-1.00015	0.806374	0.924185	0.0342409
100527943	TGIF2-RAB5IF	0.23	0.12	-1.00015	0.806374	0.924185	0.0342409
10077	TSPAN32	0.23	0.11	-1.00015	0.806374	0.924185	0.0342409
10089	KCNK7	0.23	0.11	-1.00015	0.806374	0.924185	0.0342409
100996746	SPDYE11	0.23	0.11	-1.00015	0.806374	0.924185	0.0342409
101929805	LOC101929805	0.23	0.11	-1.00015	0.806374	0.924185	0.0342409
10232	MSLN	0.23	0.11	-1.00015	0.806374	0.924185	0.0342409
10242	KCNMB2	0.23	0.12	-1.00015	0.806374	0.924185	0.0342409
102723713	LOC102723713	0.23	0.12	-1.00015	0.806374	0.924185	0.0342409
105	ADARB2	0.23	0.12	-1.00015	0.806374	0.924185	0.0342409
105376341	LOC105376341	0.23	0.12	-1.00015	0.806374	0.924185	0.0342409
10551	AGR2	0.23	0.12	-1.00015	0.806374	0.924185	0.0342409
10563	CXCL13	0.22	0.11	-1.00015	0.806374	0.924185	0.0342409
10595	ERN2	0.23	0.11	-1.00015	0.806374	0.924185	0.0342409
10738	RFPL3	0.23	0.11	-1.00015	0.806374	0.924185	0.0342409
107983987	SMIM34B	0.23	0.12	-1.00015	0.806374	0.924185	0.0342409
107984153	LOC107984153	0.23	0.12	-1.00015	0.806374	0.924185	0.0342409
107984264	LOC107984264	0.23	0.12	-1.00015	0.806374	0.924185	0.0342409
107984833	LOC107984833	0.23	0.12	-1.00015	0.806374	0.924185	0.0342409
107985729	LOC107985729	0.23	0.12	-1.00015	0.806374	0.924185	0.0342409
107987462	LOC107987462	0.22	0.11	-1.00015	0.806374	0.924185	0.0342409
107987464	LOC107987464	0.23	0.12	-1.00015	0.806374	0.924185	0.0342409
107987477	LOC107987477	0.23	0.12	-1.00015	0.806374	0.924185	0.0342409
10800	CYSLTR1	0.23	0.11	-1.00015	0.806374	0.924185	0.0342409
10815	CPLX1	0.22	0.11	-1.00015	0.806374	0.924185	0.0342409
10858	CYP46A1	0.23	0.11	-1.00015	0.806374	0.924185	0.0342409
1087	CEACAM7	0.23	0.12	-1.00015	0.806374	0.924185	0.0342409
10877	CFHR4	0.22	0.11	-1.00015	0.806374	0.924185	0.0342409
10913	EDAR	0.23	0.11	-1.00015	0.806374	0.924185	0.0342409
10990	LILRB5	0.22	0.11	-1.00015	0.806374	0.924185	0.0342409
11001	SLC27A2	0.23	0.12	-1.00015	0.806374	0.924185	0.0342409
11061	CNMD	0.23	0.11	-1.00015	0.806374	0.924185	0.0342409
11085	ADAM30	0.23	0.12	-1.00015	0.806374	0.924185	0.0342409
111064647	CSNKA2IP	0.23	0.12	-1.00015	0.806374	0.924185	0.0342409
11122	PTPRT	0.23	0.12	-1.00015	0.806374	0.924185	0.0342409
11131	CAPN11	0.23	0.12	-1.00015	0.806374	0.924185	0.0342409
11197	WIF1	0.23	0.12	-1.00015	0.806374	0.924185	0.0342409
112267897	LOC112267897	0.23	0.11	-1.00015	0.806374	0.924185	0.0342409
112267904	LOC112267904	0.23	0.12	-1.00015	0.806374	0.924185	0.0342409
112268387	LOC112268387	0.23	0.11	-1.00015	0.806374	0.924185	0.0342409
112268395	LOC112268395	0.23	0.11	-1.00015	0.806374	0.924185	0.0342409
11251	PTGDR2	0.22	0.11	-1.00015	0.806374	0.924185	0.0342409
112577592	LOC112577592	0.23	0.12	-1.00015	0.806374	0.924185	0.0342409
11283	CYP4F8	0.23	0.11	-1.00015	0.806374	0.924185	0.0342409
113230	MISP3	0.22	0.11	-1.00015	0.806374	0.924185	0.0342409
11330	CTRC	0.23	0.12	-1.00015	0.806374	0.924185	0.0342409
113828	FAM83F	0.22	0.11	-1.00015	0.806374	0.924185	0.0342409
114335	CGB1	0.22	0.11	-1.00015	0.806374	0.924185	0.0342409
114786	XKR4	0.22	0.11	-1.00015	0.806374	0.924185	0.0342409
115584	SLC5A11	0.23	0.12	-1.00015	0.806374	0.924185	0.0342409
115650	TNFRSF13C	0.23	0.11	-1.00015	0.806374	0.924185	0.0342409
116135	LRRC3B	0.22	0.11	-1.00015	0.806374	0.924185	0.0342409
116173	CMTM5	0.23	0.11	-1.00015	0.806374	0.924185	0.0342409
116179	TGM7	0.23	0.11	-1.00015	0.806374	0.924185	0.0342409
116285	ACSM1	0.23	0.12	-1.00015	0.806374	0.924185	0.0342409
116512	MRGPRD	0.22	0.11	-1.00015	0.806374	0.924185	0.0342409
120071	LARGE2	0.23	0.11	-1.00015	0.806374	0.924185	0.0342409
121340	SP7	0.23	0.12	-1.00015	0.806374	0.924185	0.0342409
123591	TMEM266	0.23	0.11	-1.00015	0.806374	0.924185	0.0342409
123624	AGBL1	0.23	0.12	-1.00015	0.806374	0.924185	0.0342409
124590	USH1G	0.23	0.12	-1.00015	0.806374	0.924185	0.0342409
124602	KIF19	0.23	0.12	-1.00015	0.806374	0.924185	0.0342409
126326	GIPC3	0.23	0.12	-1.00015	0.806374	0.924185	0.0342409
126638	RPTN	0.22	0.11	-1.00015	0.806374	0.924185	0.0342409
127707	KLHDC7A	0.23	0.12	-1.00015	0.806374	0.924185	0.0342409
1288	COL4A6	0.23	0.11	-1.00015	0.806374	0.924185	0.0342409
129852	C2orf73	0.22	0.11	-1.00015	0.806374	0.924185	0.0342409
130013	ACMSD	0.22	0.11	-1.00015	0.806374	0.924185	0.0342409
134864	TAAR1	0.22	0.11	-1.00015	0.806374	0.924185	0.0342409
135886	TMEM270	0.23	0.11	-1.00015	0.806374	0.924185	0.0342409
1359	CPA3	0.23	0.11	-1.00015	0.806374	0.924185	0.0342409
137868	SGCZ	0.22	0.11	-1.00015	0.806374	0.924185	0.0342409
138255	C9orf135	0.23	0.11	-1.00015	0.806374	0.924185	0.0342409
139411	PTCHD1	0.23	0.11	-1.00015	0.806374	0.924185	0.0342409
140456	ASB11	0.23	0.12	-1.00015	0.806374	0.924185	0.0342409
140628	GATA5	0.22	0.11	-1.00015	0.806374	0.924185	0.0342409
140902	R3HDML	0.23	0.12	-1.00015	0.806374	0.924185	0.0342409
1413	CRYBA4	0.23	0.12	-1.00015	0.806374	0.924185	0.0342409
1417	CRYBB3	0.23	0.12	-1.00015	0.806374	0.924185	0.0342409
143425	SYT9	0.23	0.12	-1.00015	0.806374	0.924185	0.0342409
145226	RDH12	0.23	0.12	-1.00015	0.806374	0.924185	0.0342409
146802	SLC47A2	0.23	0.11	-1.00015	0.806374	0.924185	0.0342409
1472	CST4	0.22	0.11	-1.00015	0.806374	0.924185	0.0342409
147407	SLC25A52	0.22	0.11	-1.00015	0.806374	0.924185	0.0342409
147920	IGFL2	0.22	0.11	-1.00015	0.806374	0.924185	0.0342409
1482	NKX2-5	0.22	0.11	-1.00015	0.806374	0.924185	0.0342409
148753	FAM163A	0.23	0.11	-1.00015	0.806374	0.924185	0.0342409
150165	XKR3	0.23	0.12	-1.00015	0.806374	0.924185	0.0342409
151790	WDR49	0.23	0.12	-1.00015	0.806374	0.924185	0.0342409
151835	CPNE9	0.23	0.12	-1.00015	0.806374	0.924185	0.0342409
151888	BTLA	0.22	0.11	-1.00015	0.806374	0.924185	0.0342409
152789	JAKMIP1	0.23	0.11	-1.00015	0.806374	0.924185	0.0342409
152940	C4orf45	0.22	0.11	-1.00015	0.806374	0.924185	0.0342409
153478	PLEKHG4B	0.22	0.11	-1.00015	0.806374	0.924185	0.0342409
153579	BTNL9	0.23	0.12	-1.00015	0.806374	0.924185	0.0342409
154150	HDGFL1	0.23	0.12	-1.00015	0.806374	0.924185	0.0342409
154215	NKAIN2	0.22	0.11	-1.00015	0.806374	0.924185	0.0342409
1551	CYP3A7	0.23	0.12	-1.00015	0.806374	0.924185	0.0342409
158763	ARHGAP36	0.22	0.11	-1.00015	0.806374	0.924185	0.0342409
158830	CXorf65	0.23	0.11	-1.00015	0.806374	0.924185	0.0342409
160492	LMNTD1	0.23	0.12	-1.00015	0.806374	0.924185	0.0342409
164127	CCDC185	0.22	0.11	-1.00015	0.806374	0.924185	0.0342409
164668	APOBEC3H	0.23	0.12	-1.00015	0.806374	0.924185	0.0342409
169966	TENT5D	0.22	0.11	-1.00015	0.806374	0.924185	0.0342409
170261	ZCCHC12	0.23	0.11	-1.00015	0.806374	0.924185	0.0342409
1769	DNAH8	0.22	0.11	-1.00015	0.806374	0.924185	0.0342409
1828	DSG1	0.23	0.12	-1.00015	0.806374	0.924185	0.0342409
1990	CELA1	0.23	0.12	-1.00015	0.806374	0.924185	0.0342409
1995	ELAVL3	0.23	0.11	-1.00015	0.806374	0.924185	0.0342409
201305	SPNS3	0.23	0.11	-1.00015	0.806374	0.924185	0.0342409
202134	FAM153B	0.23	0.12	-1.00015	0.806374	0.924185	0.0342409
221391	OPN5	0.22	0.11	-1.00015	0.806374	0.924185	0.0342409
221806	VWDE	0.23	0.12	-1.00015	0.806374	0.924185	0.0342409
222894	FERD3L	0.23	0.11	-1.00015	0.806374	0.924185	0.0342409
22983	MAST1	0.22	0.11	-1.00015	0.806374	0.924185	0.0342409
2301	FOXE3	0.23	0.12	-1.00015	0.806374	0.924185	0.0342409
2304	FOXE1	0.23	0.11	-1.00015	0.806374	0.924185	0.0342409
23316	CUX2	0.22	0.11	-1.00015	0.806374	0.924185	0.0342409
23553	HYAL4	0.23	0.12	-1.00015	0.806374	0.924185	0.0342409
23746	AIPL1	0.23	0.11	-1.00015	0.806374	0.924185	0.0342409
246	ALOX15	0.23	0.11	-1.00015	0.806374	0.924185	0.0342409
2529	FUT7	0.23	0.11	-1.00015	0.806374	0.924185	0.0342409
2561	GABRB2	0.23	0.12	-1.00015	0.806374	0.924185	0.0342409
256710	GLIPR1L1	0.23	0.12	-1.00015	0.806374	0.924185	0.0342409
25774	GSTT4	0.22	0.11	-1.00015	0.806374	0.924185	0.0342409
259291	TAS2R45	0.23	0.11	-1.00015	0.806374	0.924185	0.0342409
259292	TAS2R46	0.23	0.11	-1.00015	0.806374	0.924185	0.0342409
259308	FAM205A	0.23	0.11	-1.00015	0.806374	0.924185	0.0342409
26034	IPCEF1	0.23	0.12	-1.00015	0.806374	0.924185	0.0342409
26211	OR2F1	0.22	0.11	-1.00015	0.806374	0.924185	0.0342409
26212	OR2B6	0.23	0.12	-1.00015	0.806374	0.924185	0.0342409
2625	GATA3	0.23	0.12	-1.00015	0.806374	0.924185	0.0342409
26330	GAPDHS	0.23	0.12	-1.00015	0.806374	0.924185	0.0342409
267020	ATP5MGL	0.22	0.11	-1.00015	0.806374	0.924185	0.0342409
2681	GGTA1	0.22	0.11	-1.00015	0.806374	0.924185	0.0342409
2695	GIP	0.23	0.12	-1.00015	0.806374	0.924185	0.0342409
27006	FGF22	0.22	0.11	-1.00015	0.806374	0.924185	0.0342409
[truncated: 14,180 more rows]

## Sheet: KEGG DOWN
Category	Term	Count	%	PValue	-log10	Genes	List Total	Pop Hits	Pop Total	Fold Enrichment	Bonferroni	Benjamini	FDR
KEGG_PATHWAY	hsa04820:Cytoskeleton in muscle cells	27	4.41176	6.28134e-08	7.20195	SDC3, MYPN, COMP, SGCD, ANKRD1, ITGB8, MYH11, FLNC, ITGB6, TMOD1, JUP, TMOD2, NEB, ATP1B1, VCAN, DES, COL4A2, COL4A1, MYH9, ITGA7, ITGA6, COL6A6, TLN1, MYL9, FBN1, ITGA9, SNTB2	299	232	8840	3.44078	1.79017e-05	1.06412e-05	9.29707e-06
KEGG_PATHWAY	hsa04510:Focal adhesion	25	4.08497	7.46753e-08	7.12682	LAMA5, LAMC3, PTEN, PDGFB, TNC, PDGFA, IGF1R, CRKL, COMP, RELN, AKT3, ITGB8, ITGB6, CAV2, PRKCA, COL4A2, COL4A1, BCL2, ITGA7, ITGA6, COL6A6, TLN1, MYL9, SOS2, ITGA9	299	203	8840	3.64104	2.12822e-05	1.06412e-05	9.29707e-06
KEGG_PATHWAY	hsa04512:ECM-receptor interaction	14	2.28758	7.86034e-06	5.10456	LAMA5, LAMC3, TNC, COMP, FRAS1, RELN, COL4A2, COL4A1, ITGB8, ITGA7, COL6A6, ITGA6, ITGB6, ITGA9	299	89	8840	4.65071	0.0022377	0.000746732	0.000652408
KEGG_PATHWAY	hsa04151:PI3K-Akt signaling pathway	30	4.90196	1.22586e-05	4.91156	LAMA5, ATF2, PRKAA2, LAMC3, IRS1, PTEN, PDGFB, TNC, PDGFA, FGF1, IGF1R, COMP, RELN, BCL2L11, AKT3, ITGB8, ITGB6, ANGPT1, INSR, PRKCA, COL4A2, COL4A1, FGF18, BCL2, ITGA7, ITGA6, COL6A6, SOS2, ITGA9, TLR2	299	362	8840	2.45016	0.00348761	0.000873422	0.000763095
KEGG_PATHWAY	hsa05200:Pathways in cancer	37	6.04575	4.5784e-05	4.33929	ALK, LAMA5, LAMC3, PTEN, PDGFB, PDGFA, FGF1, PTGS2, HIF1A, DLL1, ADCY7, FOXO1, LRP6, IGF1R, CRKL, BCL2L11, WNT11, AKT3, PIM1, BDKRB2, WNT2, TGFB2, JUP, PTCH1, DAPK2, PRKCA, WNT9A, TGFBR2, AR, PLCB4, COL4A2, COL4A1, FGF18, BCL2, ITGA6, IL6ST, SOS2	299	533	8840	2.05237	0.012964	0.00260969	0.00228004
KEGG_PATHWAY	hsa05412:Arrhythmogenic right ventricular cardiomyopathy	12	1.96078	0.000136536	3.86475	GJA1, DES, SGCD, JUP, CACNA2D1, ATP2A3, ITGB8, ITGA7, ITGA6, ITGB6, ITGA9, SNTB2	299	86	8840	4.12538	0.0381679	0.00571384	0.00499209
KEGG_PATHWAY	hsa04933:AGE-RAGE signaling pathway in diabetic complications	13	2.12418	0.00014034	3.85282	EGR1, TGFB2, PRKCA, FOXO1, TGFBR2, THBD, PLCB4, COL4A2, COL4A1, AKT3, PIM1, BCL2, NOX4	299	101	8840	3.80542	0.0392102	0.00571384	0.00499209
KEGG_PATHWAY	hsa05410:Hypertrophic cardiomyopathy	12	1.96078	0.00047714	3.32135	TGFB2, DES, PRKAA2, SGCD, CACNA2D1, ATP2A3, ITGB8, ITGA7, ITGA6, ITGB6, ITGA9, SNTB2	299	99	8840	3.58366	0.127172	0.0169981	0.014851
KEGG_PATHWAY	hsa05414:Dilated cardiomyopathy	12	1.96078	0.00078867	3.1031	TGFB2, DES, SGCD, CACNA2D1, ATP2A3, ITGB8, ITGA7, ITGA6, ITGB6, ADCY7, ITGA9, SNTB2	299	105	8840	3.37888	0.201372	0.0249745	0.0218199
KEGG_PATHWAY	hsa04150:mTOR signaling pathway	15	2.45098	0.00087776	3.05662	PRKAA2, IRS1, INSR, PTEN, PRKCA, WNT9A, LRP6, IGF1R, CLIP1, WNT11, CASTOR2, AKT3, WNT2, RNF152, SOS2	299	158	8840	2.80682	0.221411	0.0250161	0.0218562
KEGG_PATHWAY	hsa04213:Longevity regulating pathway - multiple species	9	1.47059	0.00105326	2.97747	PRKAA2, IRS1, INSR, AKT3, EIF4EBP2, ADCY7, CRYAB, FOXO1, IGF1R	299	62	8840	4.29173	0.259431	0.0272889	0.0238419
KEGG_PATHWAY	hsa01521:EGFR tyrosine kinase inhibitor resistance	10	1.63399	0.00141285	2.8499	BCL2L11, AKT3, PTEN, PDGFB, BCL2, GAB1, PDGFA, PRKCA, SOS2, IGF1R	299	80	8840	3.69565	0.331653	0.031783	0.0277683
KEGG_PATHWAY	hsa04072:Phospholipase D signaling pathway	14	2.28758	0.00153269	2.81454	INSR, PDGFB, GAB1, PDGFA, PLA2G4A, PRKCA, GAB2, ADCY7, AGPAT3, DNM1, PLCB4, AKT3, SOS2, PLPP1	299	149	8840	2.77794	0.354127	0.031783	0.0277683
KEGG_PATHWAY	hsa05215:Prostate cancer	11	1.79739	0.00165644	2.78082	AR, PLAU, AKT3, PTEN, PDGFB, BCL2, PDGFA, PLAT, SOS2, FOXO1, IGF1R	299	98	8840	3.31854	0.376544	0.031783	0.0277683
KEGG_PATHWAY	hsa04928:Parathyroid hormone synthesis, secretion and action	12	1.96078	0.00167279	2.77656	NR4A2, KL, EGR1, ATF2, PLCB4, CYP24A1, WNK3, BCL2, PRKCA, ADCY7, PTHLH, LRP6	299	115	8840	3.08507	0.379447	0.031783	0.0277683
KEGG_PATHWAY	hsa05165:Human papillomavirus infection	23	3.75817	0.00194531	2.71101	LAMA5, MAML2, LAMC3, PTEN, TNC, WNT9A, PTGS2, FOXO1, COMP, RELN, WNT11, COL4A2, COL4A1, AKT3, ITGB8, ITGA7, COL6A6, ITGA6, ITGB6, ATP6V0C, WNT2, SOS2, ITGA9	299	333	8840	2.04204	0.4259	0.0346507	0.0302738
KEGG_PATHWAY	hsa04010:MAPK signaling pathway	21	3.43137	0.00280374	2.55226	ATF2, TGFB2, DUSP3, ANGPT1, IL1R1, CACNA2D1, INSR, PDGFB, PDGFA, PLA2G4A, PRKCA, FGF1, MAPK8IP1, TGFBR2, CRKL, IGF1R, PPP3CA, MKNK1, AKT3, FGF18, SOS2	299	300	8840	2.06957	0.550755	0.0470038	0.0410665
KEGG_PATHWAY	hsa04350:TGF-beta signaling pathway	11	1.79739	0.00341018	2.46722	TGFB2, BMPR2, BAMBI, FST, CHRD, ID4, NEO1, THSD4, BMP6, FBN1, TGFBR2	299	108	8840	3.01127	0.622265	0.0539945	0.0471742
KEGG_PATHWAY	hsa05205:Proteoglycans in cancer	16	2.61438	0.00371508	2.43003	TGFB2, CAV2, PTCH1, HSPB2, GAB1, PRKCA, WNT9A, HIF1A, IGF1R, WNT11, PLAU, AKT3, TIMP3, WNT2, SOS2, TLR2	299	204	8840	2.31884	0.653811	0.0557262	0.0486871
KEGG_PATHWAY	hsa05206:MicroRNAs in cancer	21	3.43137	0.00432277	2.36424	TGFB2, BMPR2, IRS1, DNMT3A, PTEN, PDGFB, TNC, PDGFA, PRKCA, PTGS2, CRKL, ZEB2, MARCKS, BCL2L11, CYP24A1, PLAU, PIM1, BCL2, TIMP3, BMF, SOS2	299	312	8840	1.98997	0.709067	0.0609123	0.0532181
KEGG_PATHWAY	hsa05226:Gastric cancer	13	2.12418	0.00469078	2.32876	TGFB2, JUP, GAB1, WNT9A, FGF1, TGFBR2, LRP6, WNT11, AKT3, FGF18, BCL2, WNT2, SOS2	299	150	8840	2.56232	0.738159	0.0609123	0.0532181
KEGG_PATHWAY	hsa04810:Regulation of actin cytoskeleton	17	2.77778	0.00477506	2.32102	ACTR3, PDGFB, PDGFA, FGF1, CRKL, AKT3, FGF18, BDKRB2, ITGB8, MYH9, ITGA7, ITGA6, MYH11, ITGB6, MYL9, SOS2, ITGA9	299	230	8840	2.18526	0.744402	0.0609123	0.0532181
KEGG_PATHWAY	hsa04068:FoxO signaling pathway	12	1.96078	0.00491573	2.30841	TGFB2, BCL2L11, PRKAA2, IRS1, INSR, AKT3, PTEN, SOS2, FOXO1, KLF2, IGF1R, TGFBR2	299	132	8840	2.68775	0.754495	0.0609123	0.0532181
KEGG_PATHWAY	hsa04015:Rap1 signaling pathway	16	2.61438	0.00531852	2.27421	ANGPT1, INSR, PDGFB, PDGFA, PRKCA, SIPA1L2, FGF1, ADCY7, CRKL, IGF1R, PLCB4, SIPA1L1, AKT3, FGF18, EVL, TLN1	299	212	8840	2.23134	0.781249	0.0631574	0.0551796
KEGG_PATHWAY	hsa05231:Choline metabolism in cancer	10	1.63399	0.00605219	2.21809	SLC22A3, SLC22A2, AKT3, PDGFB, PDGFA, PLA2G4A, PRKCA, HIF1A, SOS2, PLPP1	299	99	8840	2.98639	0.822736	0.068995	0.0602798
KEGG_PATHWAY	hsa04514:Cell adhesion molecules	13	2.12418	0.00672333	2.17242	CADM3, SELPLG, SDC3, VSIR, CLDN4, VCAN, PECAM1, ITGB8, NRCAM, ITGA6, NEO1, JAM2, ITGA9	299	157	8840	2.44808	0.853777	0.073698	0.0643888
KEGG_PATHWAY	hsa04913:Ovarian steroidogenesis	7	1.14379	0.00701756	2.15381	INSR, PLA2G4A, PTGS2, ADCY7, LDLR, BMP6, IGF1R	299	51	8840	4.05797	0.865616	0.0740743	0.0647175
KEGG_PATHWAY	hsa05418:Fluid shear stress and atherosclerosis	12	1.96078	0.00800588	2.09659	THBD, BMPR2, PRKAA2, IL1R1, CAV2, AKT3, PDGFB, BCL2, PECAM1, PDGFA, PLAT, KLF2	299	141	8840	2.51619	0.89882	0.0814884	0.0711951
KEGG_PATHWAY	hsa04961:Endocrine and other factor-regulated calcium reabsorption	7	1.14379	0.00845923	2.07267	KL, PLCB4, BDKRB2, ATP2B4, PRKCA, ATP1B1, DNM1	299	53	8840	3.90484	0.911179	0.0831338	0.0726327
KEGG_PATHWAY	hsa04974:Protein digestion and absorption	10	1.63399	0.00882386	2.05434	DPP4, SLC7A7, COL4A2, COL4A1, COL12A1, COL10A1, COL6A6, ATP1B1, KCNN4, SLC36A4	299	105	8840	2.81573	0.920019	0.0838267	0.0732381
KEGG_PATHWAY	hsa04360:Axon guidance	14	2.28758	0.00928878	2.03204	EPHA4, BMPR2, SEMA6A, SEMA3C, TRPC4, PTCH1, SEMA3B, PRKCA, PPP3CA, ABLIM1, SRGAP2, NEO1, MYL9, PLXNA3	299	184	8840	2.24953	0.930029	0.0853968	0.0746099
KEGG_PATHWAY	hsa04211:Longevity regulating pathway	9	1.47059	0.0107475	1.96869	KL, ATF2, PRKAA2, IRS1, INSR, AKT3, ADCY7, FOXO1, IGF1R	299	90	8840	2.95652	0.954023	0.0957201	0.0836291
KEGG_PATHWAY	hsa05225:Hepatocellular carcinoma	13	2.12418	0.0122886	1.9105	SMARCD1, TGFB2, PTEN, GAB1, PRKCA, WNT9A, TGFBR2, LRP6, IGF1R, WNT11, AKT3, WNT2, SOS2	299	170	8840	2.26087	0.970517	0.106128	0.0927227
KEGG_PATHWAY	hsa05222:Small cell lung cancer	9	1.47059	0.0129554	1.88755	LAMA5, COL4A2, COL4A1, LAMC3, AKT3, PTEN, BCL2, ITGA6, PTGS2	299	93	8840	2.86115	0.975679	0.108597	0.0948793
KEGG_PATHWAY	hsa04261:Adrenergic signaling in cardiomyocytes	12	1.96078	0.0149118	1.82647	ATF2, KCNE1, PLCB4, PPP1R1A, CACNA2D1, AKT3, BCL2, ATP2A3, ATP2B4, PRKCA, ATP1B1, ADCY7	299	154	8840	2.30378	0.986183	0.121424	0.106087
KEGG_PATHWAY	hsa04666:Fc gamma R-mediated phagocytosis	9	1.47059	0.0173478	1.76076	ACTR3, HCK, MARCKS, AKT3, PLA2G4A, PRKCA, GAB2, PLPP1, CRKL	299	98	8840	2.71517	0.993177	0.137337	0.119989
KEGG_PATHWAY	hsa04910:Insulin signaling pathway	11	1.79739	0.0180799	1.7428	SOCS2, PRKAA2, IRS1, PRKAR2B, MKNK1, INSR, AKT3, SORBS1, SOS2, FOXO1, CRKL	299	138	8840	2.35665	0.994483	0.139264	0.121673
KEGG_PATHWAY	hsa04071:Sphingolipid signaling pathway	10	1.63399	0.0218936	1.65968	ASAH1, PLCB4, AKT3, PTEN, BDKRB2, BCL2, PRKCA, S1PR3, SGMS2, GAB2	299	122	8840	2.42338	0.99818	0.164202	0.14346
KEGG_PATHWAY	hsa05146:Amoebiasis	9	1.47059	0.0227218	1.64356	LAMA5, TGFB2, PLCB4, COL4A2, COL4A1, IL1R1, LAMC3, PRKCA, TLR2	299	103	8840	2.58337	0.99857	0.166044	0.14507
KEGG_PATHWAY	hsa04022:cGMP-PKG signaling pathway	12	1.96078	0.0245988	1.60909	ATF2, PPP3CA, PLCB4, IRS1, INSR, AKT3, BDKRB2, ATP2A3, ATP2B4, ATP1B1, ADCY7, MYL9	299	166	8840	2.13724	0.999174	0.175266	0.153127
KEGG_PATHWAY	hsa04630:JAK-STAT signaling pathway	12	1.96078	0.0265772	1.57549	SOCS2, LEP, AKT3, PDGFB, BCL2, IL31RA, PIM1, PDGFA, LIFR, IL6ST, SOCS6, SOS2	299	168	8840	2.1118	0.999537	0.184744	0.161408
KEGG_PATHWAY	hsa05224:Breast cancer	11	1.79739	0.0278456	1.55524	WNT11, AKT3, FGF18, PTEN, WNT9A, FGF1, WNT2, DLL1, SOS2, IGF1R, LRP6	299	148	8840	2.19741	0.99968	0.188953	0.165085
KEGG_PATHWAY	hsa05211:Renal cell carcinoma	7	1.14379	0.0301408	1.52085	TGFB2, AKT3, PDGFB, GAB1, HIF1A, SOS2, CRKL	299	70	8840	2.95652	0.999837	0.198225	0.173186
KEGG_PATHWAY	hsa04066:HIF-1 signaling pathway	9	1.47059	0.0306031	1.51423	PFKFB3, ANGPT1, MKNK1, INSR, AKT3, BCL2, PRKCA, HIF1A, IGF1R	299	109	8840	2.44116	0.999858	0.198225	0.173186
KEGG_PATHWAY	hsa04926:Relaxin signaling pathway	10	1.63399	0.0313918	1.50318	ATF2, PLCB4, COL4A2, COL4A1, AKT3, PRKCA, ADCY7, RXFP1, SOS2, TGFBR2	299	130	8840	2.27425	0.999887	0.198815	0.173701
KEGG_PATHWAY	hsa05218:Melanoma	7	1.14379	0.0360297	1.44334	AKT3, FGF18, PTEN, PDGFB, PDGFA, FGF1, IGF1R	299	73	8840	2.83502	0.999971	0.223228	0.19503
KEGG_PATHWAY	hsa04520:Adherens junction	8	1.30719	0.03715	1.43004	HEG1, INSR, LMO7, SORBS1, NECTIN4, MYL9, IGF1R, TGFBR2	299	93	8840	2.54324	0.999979	0.225271	0.196816
KEGG_PATHWAY	hsa04340:Hedgehog signaling pathway	6	0.980392	0.0396813	1.40141	EVC, CUL3, GPR161, PTCH1, BCL2, CDON	299	56	8840	3.1677	0.99999	0.235608	0.205847
KEGG_PATHWAY	hsa05214:Glioma	7	1.14379	0.0426114	1.37047	AKT3, PTEN, PDGFB, PDGFA, PRKCA, SOS2, IGF1R	299	76	8840	2.72311	0.999996	0.247842	0.216536
KEGG_PATHWAY	hsa04060:Cytokine-cytokine receptor interaction	17	2.77778	0.0443808	1.3528	CCR1, CXCL6, TGFB2, TNFRSF6B, BMPR2, IL1R1, TNFSF15, IL31RA, LIFR, IL17RE, BMP6, TGFBR2, IL1RL1, CCL7, LEP, IL6ST, PF4V1	299	298	8840	1.68661	0.999998	0.252971	0.221017
KEGG_PATHWAY	hsa04925:Aldosterone synthesis and secretion	8	1.30719	0.0471793	1.32625	NR4A2, ATF2, PLCB4, ATP2B4, PRKCA, ATP1B1, ADCY7, LDLR	299	98	8840	2.41349	0.999999	0.263049	0.229822
KEGG_PATHWAY	hsa04923:Regulation of lipolysis in adipocytes	6	0.980392	0.047995	1.3188	IRS1, INSR, AKT3, PTGS2, ADCY7, MGLL	299	59	8840	3.00663	0.999999	0.263049	0.229822
KEGG_PATHWAY	hsa04935:Growth hormone synthesis, secretion and action	9	1.47059	0.0536712	1.27026	SOCS2, ATF2, PLCB4, IRS1, AKT3, PRKCA, ADCY7, SOS2, CRKL	299	122	8840	2.18104	1	0.286528	0.250335
KEGG_PATHWAY	hsa04550:Signaling pathways regulating pluripotency of stem cells	10	1.63399	0.0542896	1.26528	BMPR2, WNT11, AKT3, ID4, LIFR, WNT9A, KLF4, IL6ST, WNT2, IGF1R	299	144	8840	2.05314	1	0.286528	0.250335
KEGG_PATHWAY	hsa04014:Ras signaling pathway	14	2.28758	0.0583595	1.23389	RASA4B, ANGPT1, INSR, PDGFB, GAB1, PDGFA, PLA2G4A, PRKCA, GAB2, FGF1, IGF1R, AKT3, FGF18, SOS2	299	238	8840	1.73913	1	0.302408	0.264209
KEGG_PATHWAY	hsa04972:Pancreatic secretion	8	1.30719	0.0665361	1.17694	PLCB4, RAB3D, ATP2A3, ATP2B4, RAB27B, PRKCA, ATP1B1, ADCY7	299	106	8840	2.23134	1	0.337451	0.294825
KEGG_PATHWAY	hsa04929:GnRH secretion	6	0.980392	0.0674901	1.17076	PLCB4, TRPC4, AKT3, PRKCA, KCNN3, KCNN4	299	65	8840	2.7291	1	0.337451	0.294825
KEGG_PATHWAY	hsa04911:Insulin secretion	7	1.14379	0.0697371	1.15654	ATF2, PLCB4, PRKCA, KCNN3, ATP1B1, KCNN4, ADCY7	299	86	8840	2.40647	1	0.342673	0.299388
KEGG_PATHWAY	hsa04921:Oxytocin signaling pathway	10	1.63399	0.0760186	1.11908	PPP3CA, PLCB4, PRKAA2, CACNA2D1, PLA2G4A, PRKCA, PTGS2, ADCY7, MYL9, KCNJ2	299	154	8840	1.91982	1	0.367208	0.320824
KEGG_PATHWAY	hsa05145:Toxoplasmosis	8	1.30719	0.0807494	1.09286	LAMA5, TGFB2, LAMC3, AKT3, BCL2, ITGA6, LDLR, TLR2	299	111	8840	2.13083	1	0.38356	0.33511
KEGG_PATHWAY	hsa05235:PD-L1 expression and PD-1 checkpoint pathway in cancer	7	1.14379	0.0828502	1.08171	ALK, PPP3CA, BATF3, AKT3, PTEN, HIF1A, TLR2	299	90	8840	2.29952	1	0.387087	0.338192
KEGG_PATHWAY	hsa04920:Adipocytokine signaling pathway	6	0.980392	0.0866317	1.06232	PRKAA2, IRS1, ACSL1, LEP, AKT3, ACSL4	299	70	8840	2.53416	1	0.398226	0.347924
KEGG_PATHWAY	hsa04540:Gap junction	7	1.14379	0.0898871	1.0463	GJA1, PLCB4, PDGFB, PDGFA, PRKCA, ADCY7, SOS2	299	92	8840	2.24953	1	0.406632	0.355268
KEGG_PATHWAY	hsa04724:Glutamatergic synapse	8	1.30719	0.0932918	1.03016	PPP3CA, PLCB4, SLC1A2, PLA2G4A, SLC1A3, PRKCA, GLUL, ADCY7	299	115	8840	2.05671	1	0.41544	0.362963
KEGG_PATHWAY	hsa05161:Hepatitis B	10	1.63399	0.0995723	1.00186	ATF2, TGFB2, EGR2, EGR3, AKT3, BCL2, PRKCA, SOS2, TGFBR2, TLR2	299	163	8840	1.81382	1	0.436586	0.381438

## Sheet: KEGG UP
Category	Term	Count	%	PValue	-log10(p)	Genes	List Total	Pop Hits	Pop Total	Fold Enrichment	Bonferroni	Benjamini	FDR
KEGG_PATHWAY	hsa04623:Cytosolic DNA-sensing pathway	6	2.14286	0.00672105	2.17256	CCL5, IL1B, POLR3D, CASP1, POLR3K, ZCCHC3	128	83	8840	4.99247	0.776224	0.879551	0.879551
KEGG_PATHWAY	hsa01100:Metabolic pathways	34	12.1429	0.0116154	1.93497	ACY1, PRUNE1, MGST1, SDSL, PFAS, GMPPB, SMPD2, EXTL2, FGGY, UAP1L1, GPAT3, GCNT4, CYC1, GPAT2, GFUS, COLGALT1, ATP6V1D, XYLB, NQO1, MGAM, CHKB, MARS2, PYCR1, ALG3, B3GALT6, FAH, NME1, GSTA4, DAD1, HKDC1, PPT1, CRYL1, ST6GALNAC4, DCTPP1	128	1561	8840	1.50424	0.925258	0.879551	0.879551
KEGG_PATHWAY	hsa01250:Biosynthesis of nucleotide sugars	4	1.42857	0.0157665	1.80227	GMPPB, HKDC1, UAP1L1, GFUS	128	37	8840	7.46622	0.970638	0.879551	0.879551
KEGG_PATHWAY	hsa05418:Fluid shear stress and atherosclerosis	7	2.5	0.0158478	1.80003	NQO1, IL1A, GSTA4, IL1B, MGST1, RAC2, SQSTM1	128	141	8840	3.42863	0.971171	0.879551	0.879551
KEGG_PATHWAY	hsa00520:Amino sugar and nucleotide sugar metabolism	4	1.42857	0.0347871	1.45858	GMPPB, HKDC1, UAP1L1, GFUS	128	50	8840	5.525	0.999614	1	1
KEGG_PATHWAY	hsa05202:Transcriptional misregulation in cancer	7	2.5	0.0592968	1.22697	NTRK1, HOXA9, SLC45A3, BCL2A1, HDAC1, PPARG, HOXA11	128	193	8840	2.50486	0.999999	1	1
KEGG_PATHWAY	hsa04010:MAPK signaling pathway	9	3.21429	0.0669295	1.17438	NTRK1, FGF5, IL1A, DAXX, IL1B, RAC2, ECSIT, EPHA2, STK3	128	300	8840	2.07187	1	1	1
KEGG_PATHWAY	hsa00970:Aminoacyl-tRNA biosynthesis	4	1.42857	0.0689987	1.16116	AARS2, MARS2, CARS2, VARS1	128	66	8840	4.18561	1	1	1
KEGG_PATHWAY	hsa04148:Efferocytosis	6	2.14286	0.0738461	1.13167	P2RY6, CASP1, TYRO3, PPARG, SCARF1, RAB7A	128	156	8840	2.65625	1	1	1
KEGG_PATHWAY	hsa00051:Fructose and mannose metabolism	3	1.07143	0.0852986	1.06906	GMPPB, HKDC1, GFUS	128	34	8840	6.09375	1	1	1
KEGG_PATHWAY	hsa00040:Pentose and glucuronate interconversions	3	1.07143	0.0940587	1.0266	FGGY, CRYL1, XYLB	128	36	8840	5.75521	1	1	1
KEGG_PATHWAY	hsa03030:DNA replication	3	1.07143	0.0940587	1.0266	POLA2, FEN1, MCM5	128	36	8840	5.75521	1	1	1

## Sheet: R4RA refractory Zscore
	siCtrl_1	siTEAD4_1	siCtrl_2	siTEAD4_2	siCtrl_3	siTEAD4_3	mean_siCtrl	mean_siTEAD4
AATK	0.191437	-1.55893	0.704977	-0.759724	0.238094	1.18415	0.378169	-0.378169
ABCA2	-0.00947046	-1.44227	1.29367	0.187812	0.763104	-0.792842	0.682433	-0.682433
ABCA3	0.732442	-0.725022	0.66689	1.26723	-1.00591	-0.93563	0.131141	-0.131141
ABCB1	-0.899635	-0.899635	0.00727947	-0.0503295	0.00419327	1.83813	-0.296054	0.296054
ABI3BP	0.470942	-1.09594	1.01033	-0.91662	1.15306	-0.621778	0.878113	-0.878113
ABLIM1	1.19956	-1.0167	0.928216	-0.873185	0.542512	-0.780405	0.890095	-0.890095
ABR	1.68334	-0.805785	-0.40255	0.390697	0.210444	-1.07615	0.497079	-0.497079
ABTB1	0.398047	0.5819	-0.253126	-1.13612	1.44246	-1.03316	0.529127	-0.529127
ABTB2	1.5837	-1.03019	-0.617561	-0.786599	0.610648	0.240002	0.525595	-0.525595
ACACB	0.138661	-1.64055	0.116723	-0.404412	1.40021	0.389364	0.551865	-0.551865
ACADSB	-0.458867	-0.686378	1.9292	-0.345034	0.217096	-0.656012	0.562475	-0.562475
ACAN	1.6307	-0.267387	-0.738119	-1.00355	0.757423	-0.379071	0.550002	-0.550002
ACAP3	-0.639266	-0.548148	-0.915336	-0.42667	1.07497	1.45445	-0.159876	0.159876
ACCS	-0.919966	-1.24095	0.977669	0.165302	1.25477	-0.236827	0.437492	-0.437492
ACIN1	-0.0441948	-1.26951	-0.497054	-0.440854	1.57864	0.672972	0.345796	-0.345796
ACKR4	-0.777823	1.16872	-0.434455	1.20965	-1.17346	0.00736564	-0.795247	0.795247
ACTC1	0.0908822	-1.15791	0.920699	-0.409226	1.39167	-0.83612	0.801084	-0.801084
ACTG2	-0.79233	1.69786	-0.79233	0.298911	-0.79233	0.380219	-0.79233	0.79233
ACTN1	0.389562	-1.50885	0.136761	1.51286	-0.513698	-0.016637	0.00420839	-0.00420839
ACTN4	1.2403	-1.6811	-0.237189	0.578796	0.395552	-0.296355	0.466221	-0.466221
ADAM11	0.117893	-1.09177	-0.265727	-0.704986	1.78955	0.155046	0.547238	-0.547238
ADAMTS10	-0.937564	-0.955602	0.0855068	-0.457517	1.59392	0.671256	0.247288	-0.247288
ADAMTS7	0.83776	0.962542	-1.23497	-1.19289	0.650383	-0.0228188	0.0843901	-0.0843901
ADCY2	-0.239435	0.50467	0.353082	-1.34148	-0.756963	1.48012	-0.214439	0.214439
ADCY4	0.402138	-0.81281	-0.832831	-0.98679	1.22275	1.00755	0.264018	-0.264018
ADCY5	1.96002	-0.0231363	-0.248465	-0.734361	-0.251574	-0.702482	0.48666	-0.48666
ADCY6	0.793549	-0.670297	-0.736207	-0.920518	1.5901	-0.0566275	0.549148	-0.549148
ADCY9	-0.324914	-1.72759	0.981664	-0.0168462	0.964792	0.122891	0.540514	-0.540514
ADHFE1	-1.12541	-0.78961	0.641177	1.08994	-0.772333	0.956243	-0.418856	0.418856
ADRA2A	-0.967992	-0.741817	1.01778	-0.480991	1.46897	-0.295952	0.506253	-0.506253
ADRA2B	NA	NA	NA	NA	NA	NA	NA	NA
AFAP1L1	0.265369	-1.35633	0.0218083	-0.347141	1.69961	-0.283317	0.662264	-0.662264
AGAP5	0.390402	-2.03717	0.449407	0.291455	0.440945	0.46496	0.426918	-0.426918
AGRN	-0.607495	-0.181179	-1.24668	1.13271	-0.371319	1.27397	-0.741833	0.741833
AHDC1	1.16004	-1.28082	-0.462317	0.516969	-0.841754	0.907882	-0.0480093	0.0480093
AHI1	-0.2567	-0.234465	1.3727	-1.15034	1.03867	-0.769871	0.718225	-0.718225
AHNAK	0.720544	-1.16799	1.08232	0.820087	-0.400222	-1.05474	0.467548	-0.467548
AKAP1	0.397468	0.943113	-0.499796	1.24007	-1.04147	-1.03939	-0.381265	0.381265
AKAP8L	0.223315	-1.33161	-0.880103	-0.116169	1.34748	0.757077	0.230232	-0.230232
ALDH8A1	0.156727	1.61651	0.186569	-1.07105	0.182289	-1.07105	0.175195	-0.175195
ALOX12	-1.10152	0.64808	-0.71252	-0.0396171	1.63494	-0.429372	-0.059697	0.059697
ALPK3	0.882478	-1.43023	-0.348248	-0.104857	1.37865	-0.377789	0.637626	-0.637626
ALS2CL	-1.20321	0.44858	-0.764748	1.28438	-0.620392	0.855388	-0.862784	0.862784
AMOT	-0.627804	-0.744863	-0.300795	0.452933	-0.616636	1.83717	-0.515078	0.515078
AMOTL1	-0.183647	-0.51977	1.28782	1.06198	-0.296633	-1.34975	0.269181	-0.269181
AMOTL2	-0.860985	-0.782515	-0.54194	1.61463	-0.254377	0.825184	-0.552434	0.552434
AMPD2	-0.787573	1.12147	-1.11438	0.764108	-0.796859	0.813233	-0.899604	0.899604
AMY2B	-0.946704	-1.21545	0.769187	0.00376069	1.42598	-0.0367694	0.416154	-0.416154
ANAPC2	0.451093	1.51351	-1.47716	0.215279	-0.474964	-0.227762	-0.500343	0.500343
ANGPT2	-0.428745	-0.338107	-0.405428	-0.467846	2.03941	-0.399282	0.401745	-0.401745
ANK1	1.69616	-0.708922	-0.59128	-0.928962	0.631097	-0.0980873	0.578657	-0.578657
ANKFY1	0.983547	-1.376	-0.526306	1.31566	-0.360528	-0.0363643	0.0322377	-0.0322377
ANKK1	0.332102	1.89736	-0.557712	-0.710237	-0.558231	-0.403279	-0.261281	0.261281
ANKMY1	-0.0458246	1.20113	-0.863659	-1.44082	0.383485	0.765687	-0.175333	0.175333
ANKRD23	-0.999873	-0.343085	-0.385198	1.87828	-0.387289	0.237167	-0.590787	0.590787
ANKRD33B	0.747696	-0.211594	-1.29643	1.24579	0.480323	-0.965787	-0.0228035	0.0228035
ANKRD34A	0.0921357	-0.82821	-0.830285	1.33876	-0.834364	1.06196	-0.524171	0.524171
ANKRD52	-0.362407	-0.285978	-0.304853	1.76493	-1.19627	0.384587	-0.621178	0.621178
ANKS1A	0.918703	-1.93597	0.0492251	0.324459	0.537656	0.10593	0.501862	-0.501862
ANKZF1	-0.508716	-0.659466	-0.753236	-0.619587	1.0188	1.5222	-0.0810506	0.0810506
ANO2	-0.356774	-0.781136	1.82692	0.44006	-0.347938	-0.781136	0.374071	-0.374071
ANO8	0.222164	-1.18338	-0.0861126	-0.95411	1.56181	0.439624	0.565954	-0.565954
ANXA3	1.1475	-0.774915	-0.811821	0.162879	-0.947865	1.22422	-0.204062	0.204062
AOC3	-0.318751	-0.454015	-0.44855	-0.727068	1.99015	-0.0417661	0.407617	-0.407617
AP3M2	-0.855654	0.21697	-0.390078	1.82337	-0.86004	0.065434	-0.701924	0.701924
AP4B1	-1.12123	1.41669	-0.256585	0.958281	-0.855323	-0.141825	-0.744381	0.744381
APAF1	0.127035	-1.70855	0.527827	-0.280847	1.30631	0.028225	0.653724	-0.653724
APBB2	-0.707693	-1.35183	1.24107	0.63541	0.687742	-0.504697	0.40704	-0.40704
APBB3	-0.263478	-0.899127	-0.674845	-0.65596	1.49959	0.993815	0.18709	-0.18709
APP	1.33759	-0.48104	-0.655161	1.138	-1.09289	-0.246509	-0.136819	0.136819
AQP1	-1.1951	0.101897	1.2832	-0.809529	1.04036	-0.420826	0.376152	-0.376152
AR	0.0450905	-1.01015	1.65507	-0.5924	0.615502	-0.713111	0.771887	-0.771887
ARAP3	-0.907974	0.748409	-1.48833	0.819891	-0.0249366	0.852938	-0.80708	0.80708
ARHGAP1	1.47157	-1.59037	0.361953	-0.0347141	-0.379233	0.170792	0.484764	-0.484764
ARHGAP17	0.766775	-1.48985	0.779962	-0.697739	0.988213	-0.347362	0.844983	-0.844983
ARHGAP21	0.169984	-1.73028	1.19544	-0.00352414	0.674234	-0.305859	0.679887	-0.679887
ARHGAP23	1.73742	-1.25348	0.0856748	-0.4342	0.252532	-0.387955	0.691877	-0.691877
ARHGAP29	-0.752243	-0.223095	-0.260323	1.88714	-0.846831	0.19535	-0.619799	0.619799
ARHGAP32	0.327875	-1.13221	0.887609	-0.978302	1.30342	-0.408382	0.839633	-0.839633
ARHGAP33	-1.07829	-0.916603	0.163587	-0.486241	1.00319	1.31436	0.029496	-0.029496
ARHGAP35	1.21951	-1.31146	0.811951	-0.373592	0.510178	-0.856584	0.847213	-0.847213
ARHGEF10	0.236643	-0.321924	1.17801	1.00336	-0.695096	-1.40099	0.239851	-0.239851
ARHGEF17	1.08414	-1.31713	-0.938602	-0.118513	1.07086	0.219246	0.405464	-0.405464
ARHGEF26	-0.921902	0.554299	1.1822	0.946099	-0.888325	-0.87237	-0.209343	0.209343
ARHGEF28	0.19084	-0.277138	0.8066	1.4005	-0.946707	-1.1741	0.0169109	-0.0169109
ARHGEF7	0.931136	-1.76066	-0.223688	-0.0827674	0.161195	0.974782	0.289548	-0.289548
ARVCF	-0.91194	-0.669668	1.28051	1.02373	0.259609	-0.982238	0.209392	-0.209392
ASAP2	0.856971	-1.02687	-0.202802	-0.6546	1.56575	-0.538456	0.739974	-0.739974
ASCC2	1.4189	-1.31919	0.549995	-0.626992	0.513323	-0.536038	0.827407	-0.827407
ASH1L	0.81686	-1.59304	0.941624	-0.31536	0.706476	-0.556564	0.821653	-0.821653
ATG16L2	-0.904426	-0.82835	-0.23934	-0.270162	1.7737	0.468577	0.209978	-0.209978
ATG2B	-0.000678289	-1.54045	0.802953	1.02933	0.517891	-0.809048	0.440055	-0.440055
ATN1	0.60582	-1.20582	-1.2281	0.165763	0.469511	1.19283	-0.0509224	0.0509224
ATOH8	0.0326072	1.61452	-1.11179	0.0640527	-0.996993	0.397608	-0.692059	0.692059
ATP1A2	-0.359571	-1.09579	0.0353799	1.72905	0.407304	-0.716374	0.0277042	-0.0277042
ATP2B4	0.757274	-1.15635	1.44361	-0.223474	0.145522	-0.966582	0.782134	-0.782134
ATP9A	0.0496847	-1.1224	1.59399	-0.511196	0.678912	-0.68899	0.774195	-0.774195
AUTS2	-0.169743	-1.38601	0.849771	-0.501764	1.42453	-0.216782	0.701519	-0.701519
BAIAP3	-0.46346	-0.739014	-0.684263	-0.583125	1.67122	0.798641	0.1745	-0.1745
BBS2	0.519173	-1.01141	1.06319	-0.89133	1.09061	-0.770231	0.890989	-0.890989
BCAM	-0.177654	-0.0734761	0.528628	1.66463	-1.08659	-0.855531	-0.245206	0.245206
BCAR1	1.01789	-0.192151	-1.15716	1.05651	-1.13999	0.414911	-0.426424	0.426424
BCL2L2	-1.07342	1.19166	-0.766216	0.379931	-0.777124	1.04516	-0.872252	0.872252
BCL6	0.1819	-1.47068	0.422826	-0.929337	1.17152	0.623778	0.592081	-0.592081
BCL9L	-0.187595	-0.900843	-0.927041	1.29213	-0.463757	1.18711	-0.526131	0.526131
BCOR	0.904619	-1.66328	0.084327	-0.58834	0.995159	0.267516	0.661368	-0.661368
BEND7	-1.22031	0.496483	-0.000681297	1.5626	-0.904551	0.0664532	-0.708513	0.708513
BGN	-0.889121	-1.54088	0.751538	0.0911286	0.826899	0.760438	0.229772	-0.229772
BIRC6	0.791047	-1.54981	0.959307	0.278657	0.415991	-0.895193	0.722115	-0.722115
BMP4	1.40298	-0.217927	1.09467	-0.883847	-0.574601	-0.821276	0.641017	-0.641017
BOC	1.55856	-1.51248	0.315325	0.142963	-0.117583	-0.386776	0.585433	-0.585433
BRD1	0.327813	-1.0627	-0.366784	-0.746503	1.74978	0.0983878	0.57027	-0.57027
BRD8	0.655357	-0.605729	0.202334	-1.65494	1.17036	0.232616	0.676016	-0.676016
BRF1	0.826995	1.09663	-1.42918	0.631634	-0.700746	-0.42533	-0.434312	0.434312
BTBD9	1.62566	-1.45976	0.146365	-0.44292	0.0552219	0.0754291	0.609082	-0.609082
C11orf95	-0.171984	-0.734562	1.72705	-0.574828	0.614559	-0.86024	0.72321	-0.72321
C1orf115	-0.311649	0.60233	-1.53362	-0.0488811	-0.176068	1.46789	-0.673779	0.673779
C1orf198	-0.579395	1.1451	-1.18381	0.0291048	-0.648192	1.23719	-0.803799	0.803799
C20orf96	-0.646123	-1.18437	0.572734	-0.0433633	1.65142	-0.350302	0.52601	-0.52601
C2CD2	0.0235895	-0.910976	1.70058	-0.533336	0.550709	-0.830571	0.758295	-0.758295
C3orf62	0.902673	0.368513	-1.28029	-1.23916	0.842802	0.405464	0.15506	-0.15506
CA2	-0.523696	-0.377478	1.82057	0.447441	-0.942681	-0.424159	0.118066	-0.118066
CABIN1	1.58435	-1.1421	-0.457184	-0.504501	0.801464	-0.282033	0.642878	-0.642878
CACHD1	0.026508	-1.30111	0.679381	-0.777574	1.49198	-0.119186	0.732624	-0.732624
CACNA1C	0.471879	-1.37275	1.22235	0.328935	0.409315	-1.05972	0.70118	-0.70118
CACNA1H	-0.295594	-0.243039	-0.851824	-0.318266	1.98723	-0.27851	0.279938	-0.279938
CACNA2D2	-1.03259	-1.00609	0.985458	1.37759	-0.167729	-0.15663	-0.0716217	0.0716217
CACNB1	-0.637156	-0.950137	-0.293746	-0.585017	0.899843	1.56621	-0.010353	0.010353
CALCOCO1	0.709017	-1.34486	0.374346	-0.724843	1.36972	-0.383376	0.817694	-0.817694
CALD1	-0.893597	-0.968896	1.13419	1.31999	-0.467474	-0.124213	-0.0756261	0.0756261
CAMK2G	-0.242412	-1.23841	0.892215	1.47717	-0.576028	-0.312531	0.0245918	-0.0245918
CAMKK2	1.08477	-0.375125	-0.940702	1.4356	-0.677125	-0.527422	-0.177685	0.177685
CAP2	0.383776	-1.02491	1.06585	1.1351	-1.06386	-0.495952	0.128588	-0.128588
CAPN3	-0.905328	-0.74206	-0.235131	-0.605448	1.48156	1.00641	0.113701	-0.113701
CAPN5	1.14561	-1.36133	0.700353	-0.531528	0.751545	-0.704648	0.865835	-0.865835
CAPRIN2	-0.778881	-1.14009	1.73236	0.293157	-0.0741875	-0.0323562	0.293095	-0.293095
CARD10	0.00747392	1.63691	-0.936286	0.581204	-1.01538	-0.273927	-0.648063	0.648063
CASC3	0.752235	-1.44745	0.645996	-1.02449	0.921384	0.152322	0.773205	-0.773205
CASKIN2	1.13987	-1.07925	-0.101164	-0.830193	1.289	-0.418258	0.775901	-0.775901
CASP2	0.213572	-0.689113	1.06715	0.884086	-1.59525	0.119555	-0.104843	0.104843
CATSPER2	-1.37113	0.504658	-0.120778	1.21294	-0.935657	0.70997	-0.809189	0.809189
CBLN3	-0.999881	-1.27746	0.226415	-0.0943854	1.01349	1.13182	0.0800072	-0.0800072
CCDC121	-0.810163	-0.727862	0.549347	0.407657	-0.969865	1.55089	-0.410227	0.410227
CCDC14	-1.05644	0.456571	-0.0210135	1.68556	-0.897828	-0.166852	-0.658426	0.658426
CCDC3	0.0657745	-0.930098	1.75176	-0.60238	0.431257	-0.71631	0.749596	-0.749596
CCDC40	-0.346318	-1.5241	0.33992	0.732111	1.28996	-0.491575	0.427855	-0.427855
CCDC68	0.480187	-1.38631	1.22746	-0.861076	0.746208	-0.206478	0.817953	-0.817953
CCDC84	-1.62334	-0.467784	-0.186203	0.262011	1.08475	0.930567	-0.241598	0.241598
CCL28	0.21346	-1.41096	-0.201928	-0.760379	1.00158	1.15823	0.337703	-0.337703
CCNL2	-1.31409	0.299963	-0.799842	-0.360927	1.24252	0.932371	-0.290469	0.290469
CD109	-0.242388	-1.07027	1.76727	-0.149764	0.396946	-0.701797	0.640611	-0.640611
CD34	0.210574	-0.646356	-0.706448	-0.136348	-0.626184	1.90476	-0.374019	0.374019
CDC14B	0.287866	-1.46263	0.987248	0.764502	-1.01384	0.436856	0.0870918	-0.0870918
CDC42BPA	0.198934	-1.22141	1.24378	-0.46673	1.03749	-0.792066	0.826735	-0.826735
CDC42BPB	1.13645	-1.56912	0.361031	0.157598	0.694406	-0.780364	0.730629	-0.730629
CDH13	0.740509	0.517453	1.05479	0.127383	-1.02266	-1.41748	0.257547	-0.257547
CDH19	-0.486077	-0.486077	-0.0682207	-0.486077	2.01253	-0.486077	0.486077	-0.486077
CDH24	-1.04922	0.334023	-1.24555	-0.081311	1.28989	0.752169	-0.33496	0.33496
CDK5RAP2	-0.198429	-0.0209212	-0.0254922	1.80324	-1.27597	-0.28243	-0.499963	0.499963
CEACAM19	-0.0779473	-1.09709	-0.14998	-0.173584	1.89271	-0.394116	0.554929	-0.554929
CEP170B	-0.601832	-0.20249	-1.12112	1.81245	0.212297	-0.0993052	-0.50355	0.50355
CEP44	-1.42369	0.360238	1.20501	0.541563	0.315968	-0.999089	0.0324294	-0.0324294
CEP68	0.447953	-1.05341	0.312582	-0.922043	1.6084	-0.393481	0.789646	-0.789646
CEP95	-1.72403	-0.15869	0.0726647	0.198993	1.37994	0.231119	-0.0904741	0.0904741
CGNL1	1.13272	-1.74181	-0.321316	-0.0237746	0.72611	0.228071	0.512504	-0.512504
CHKA	0.65189	1.08378	-0.399488	-1.30691	-0.889973	0.860703	-0.212523	0.212523
CHODL	0.766311	-0.598844	1.68849	-0.456553	-0.611564	-0.787843	0.614413	-0.614413
CHRD	0.157464	-1.07967	0.131411	-0.841058	1.75225	-0.120393	0.680374	-0.680374
CHST3	1.14903	-0.912712	1.3009	-0.325844	-0.209163	-1.00221	0.746922	-0.746922
CHSY3	-0.455501	0.592465	-0.310698	1.36729	-1.53571	0.342157	-0.767304	0.767304
CIC	-0.154837	-0.852133	-1.32441	0.770146	0.19582	1.36542	-0.427809	0.427809
CILP2	-0.045862	-0.603158	0.628685	-0.802119	1.6874	-0.864948	0.756741	-0.756741
CIZ1	1.41482	-1.13572	0.146	-0.880339	0.863413	-0.408174	0.808079	-0.808079
CKAP5	0.928644	-1.74869	0.721856	0.376525	0.295641	-0.573973	0.648713	-0.648713
CKB	1.66895	0.149638	-1.23253	-0.45055	-0.547809	0.412295	-0.0371276	0.0371276
CKMT2	-0.36323	0.15143	-1.28016	0.305595	-0.504359	1.69073	-0.715917	0.715917
CLASRP	-0.815655	-0.753438	-0.857537	0.0394223	1.49421	0.892994	-0.0596596	0.0596596
CLCN4	-0.959309	-1.45273	0.794543	0.0701665	0.512945	1.03439	0.11606	-0.11606
CLSTN1	0.27423	-1.50145	1.27193	0.146307	0.616182	-0.807201	0.72078	-0.72078
CLU	-0.403491	-1.52549	0.52839	-0.227619	1.46738	0.160826	0.53076	-0.53076
CMIP	-1.1582	-1.17215	-0.171661	0.989712	0.499103	1.01319	-0.276918	0.276918
CNN1	-0.458787	-0.778338	0.492659	-0.733751	1.81383	-0.335609	0.615899	-0.615899
CNNM2	1.6209	0.388931	0.202035	-0.165617	-0.850524	-1.19573	0.324138	-0.324138
CNNM3	1.37203	-0.473674	0.211952	-1.30416	0.848126	-0.65428	0.810704	-0.810704
CNTNAP1	0.98136	-1.30217	-1.15716	0.501436	0.118118	0.858416	-0.0192271	0.0192271
COBLL1	0.584953	-1.09448	1.36653	-0.365719	0.572321	-1.0636	0.841267	-0.841267
COCH	1.42184	-0.0752739	-0.847773	-1.14032	0.932268	-0.290738	0.502111	-0.502111
COG1	-0.521798	-0.0309209	-1.42714	1.47878	-0.184044	0.685115	-0.710992	0.710992
COL11A2	-1.09738	0.362483	-1.04808	-0.050453	0.252395	1.58103	-0.63102	0.63102
COL12A1	1.5529	-0.838299	0.61795	-0.69099	0.319769	-0.961334	0.830208	-0.830208
COL16A1	-0.79302	-0.258155	-0.980024	-0.42662	0.962841	1.49498	-0.270068	0.270068
COL18A1	0.481656	1.03172	-1.61388	-0.130182	-0.611084	0.841773	-0.581103	0.581103
COL21A1	-0.94042	-0.603793	1.89497	-0.202842	0.158479	-0.306393	0.371009	-0.371009
COL24A1	-0.260376	1.64737	0.165687	-0.4443	-1.38463	0.27625	-0.493107	0.493107
COL27A1	-0.442482	-0.481537	-1.18952	-0.295513	0.914475	1.49458	-0.239177	0.239177
COL5A3	-0.771112	-0.259997	-0.944453	-0.524063	1.40326	1.09636	-0.104101	0.104101
COMP	-0.249994	-0.978809	1.46409	-0.46451	1.00732	-0.778092	0.74047	-0.74047
CORO2B	1.07906	1.03444	-0.122605	-0.0573419	-0.304222	-1.62933	0.217409	-0.217409
CORO6	-0.585523	-1.43375	0.103133	0.898389	1.30445	-0.286699	0.27402	-0.27402
CPE	0.786227	-0.653211	-1.25875	-0.675247	0.517738	1.28324	0.0150726	-0.0150726
CPEB2	0.36984	-1.60442	0.127457	-0.655543	1.26184	0.500828	0.586379	-0.586379
CPSF7	0.419933	-1.50838	0.296987	-0.957485	0.958307	0.79064	0.558409	-0.558409
CREBBP	1.26074	-1.42427	-0.405627	0.255368	0.899527	-0.585746	0.584881	-0.584881
CRIM1	0.481201	-1.02033	1.60171	-0.455488	0.31699	-0.924086	0.799968	-0.799968
CRISPLD1	-0.89368	-0.896561	-0.356795	1.17593	-0.355837	1.32695	-0.535437	0.535437
CRMP1	-0.652983	-1.43277	-0.380123	0.461097	1.27997	0.724809	0.0822885	-0.0822885
CROCC	-0.0631865	-0.492744	-1.68888	0.77014	0.405331	1.06934	-0.448912	0.448912
CRTC3	0.123617	-1.51723	-0.788168	0.281825	0.652358	1.2476	-0.0040645	0.0040645
CRY2	-0.900547	-0.638021	-0.81164	0.263649	0.381158	1.7054	-0.443676	0.443676
CRYAB	-0.0575147	-1.14675	0.625797	-0.875671	1.58321	-0.129072	0.717166	-0.717166
CSAD	-1.55308	-0.14247	-0.241658	-0.208968	0.787987	1.35819	-0.335582	0.335582
CSDC2	0.0419563	-0.980776	1.12145	-0.60497	1.28901	-0.866674	0.817473	-0.817473
CSPG4	0.818275	-1.76824	-0.327322	0.191508	1.02791	0.0578671	0.506288	-0.506288
CTNND1	-0.312619	-1.8289	0.703939	0.433077	0.072249	0.932252	0.154523	-0.154523
CTPS2	-1.30007	-0.105348	0.204193	1.45806	-0.869401	0.612559	-0.655091	0.655091
CTTN	0.923763	-1.16508	-0.811695	1.37654	0.1409	-0.464423	0.0843228	-0.0843228
CX3CL1	-0.340659	-0.628882	-0.732182	-0.329993	0.0725821	1.95913	-0.33342	0.33342
CYP26B1	1.79895	-0.704062	0.106535	-0.712377	0.316584	-0.805625	0.740688	-0.740688
CYP2D6	-0.923257	-0.923257	0.815302	-0.597633	1.50244	0.126403	0.464829	-0.464829
CYTH3	0.466452	-1.7353	1.20649	-0.24665	0.476193	-0.167184	0.716378	-0.716378
D2HGDH	-1.30815	-0.294482	-0.1294	1.77583	0.102105	-0.145906	-0.445147	0.445147
DAAM1	0.312941	-1.1145	1.25437	-0.666265	1.00668	-0.793228	0.857996	-0.857996
DAAM2	-0.335388	-0.144796	-0.951469	-0.270779	-0.253048	1.95548	-0.513301	0.513301
DCAF5	-0.496847	-1.59014	0.1352	-0.0949047	0.796593	1.2501	0.144982	-0.144982
DCHS1	-0.238496	-1.08101	0.978649	-0.713894	1.46303	-0.40827	0.734393	-0.734393
DCLK2	0.488815	-0.739498	0.944053	-1.06032	1.21579	-0.848848	0.882887	-0.882887
DDHD2	-0.495367	-1.13691	0.126827	-0.827299	1.02376	1.30899	0.218405	-0.218405
DDX11	-1.24761	0.339341	-1.07132	1.26124	0.766527	-0.0481777	-0.517466	0.517466
DDX17	0.246313	-0.962112	0.138777	-1.0276	1.71089	-0.106275	0.698661	-0.698661
DDX19A	0.22784	0.28497	-0.334345	0.569924	1.06633	-1.81472	0.319943	-0.319943
DDX42	0.584668	-1.91514	0.0871873	0.0404973	0.960419	0.242372	0.544091	-0.544091
DENND3	0.861263	-1.57423	0.290815	-0.222447	1.1703	-0.525702	0.774127	-0.774127
DES	1.69659	-0.837605	0.371643	-0.930352	0.280708	-0.580981	0.78298	-0.78298
DGCR2	-0.271311	0.891859	-1.30605	0.86778	-1.00097	0.818685	-0.859441	0.859441
DGCR8	-0.87053	1.65032	-0.879677	0.674421	-0.537153	-0.0373868	-0.762453	0.762453
DGKD	0.274002	-1.40799	-0.913727	0.0354084	1.20819	0.80412	0.189488	-0.189488
DHX16	1.62817	-0.988142	0.243702	-0.41381	0.48323	-0.953151	0.785034	-0.785034
DHX34	-0.577576	0.749489	-1.38175	1.25014	-0.582196	0.541889	-0.847173	0.847173
DHX37	-0.0195516	0.543111	-1.1912	1.61025	-0.823825	-0.118778	-0.678193	0.678193
DHX38	0.500972	-0.871976	-1.31419	1.49151	0.00133116	0.192357	-0.270629	0.270629
DIDO1	1.28474	-0.499157	-0.333909	0.182446	0.856488	-1.49061	0.602441	-0.602441
DIS3L2	-0.20424	-0.17909	-0.709836	1.63121	-1.16812	0.630075	-0.694065	0.694065
DIXDC1	0.0160421	-1.02993	1.52677	-0.699958	0.835336	-0.648253	0.792715	-0.792715
DLG3	-0.44162	-1.35338	1.46115	0.0309056	0.780571	-0.477634	0.600034	-0.600034
DLG5	0.439119	-1.55919	0.0271653	-0.183607	1.51202	-0.235506	0.659434	-0.659434
DLGAP4	0.855333	-1.84428	0.289594	-0.140811	0.873066	-0.0328973	0.672664	-0.672664
DLL1	1.1624	-0.676359	0.912733	-1.02743	0.599726	-0.971077	0.891621	-0.891621
DLL4	1.95167	-0.548376	-0.556385	-0.673288	-0.323773	0.15015	0.357171	-0.357171
DLX5	-0.306122	-0.87935	-0.487909	1.96161	-0.19666	-0.0915714	-0.33023	0.33023
DMPK	-0.794606	-1.19883	0.0621308	-0.350767	1.45773	0.824338	0.241752	-0.241752
DMTF1	-1.3262	-0.234228	-0.544464	-0.268935	1.19039	1.18343	-0.226757	0.226757
DMTN	-0.230598	-0.0249565	-0.863657	0.965463	1.35288	-1.19913	0.086207	-0.086207
DNAH1	1.10548	-0.628259	-0.614364	-0.418451	1.43459	-0.87899	0.6419	-0.6419
DNHD1	-0.541665	-1.15666	-0.771017	0.129602	1.27053	1.06922	-0.0140513	0.0140513
DNM1	0.132334	-0.887845	1.41819	-0.861777	0.94231	-0.743208	0.830943	-0.830943
DNMBP	0.9376	-0.835995	-1.03612	-0.849101	0.756041	1.02757	0.219174	-0.219174
DOCK1	0.0914948	-1.56271	0.807561	-0.655773	1.20603	0.113393	0.701697	-0.701697
DOCK9	0.585597	-1.56838	0.829177	0.221571	0.819926	-0.887889	0.7449	-0.7449
DOK6	0.27695	-0.781945	0.380863	-1.23939	1.60402	-0.240499	0.753944	-0.753944
DPF2	-0.53924	0.318874	-1.57134	0.433512	-0.0378927	1.39609	-0.716158	0.716158
DPH1	0.791204	1.50763	-0.958626	-0.170425	-0.100724	-1.06906	-0.089382	0.089382
DSP	0.50873	-0.693048	1.39857	0.667718	-0.731089	-1.15088	0.392071	-0.392071
DST	-0.011626	-1.49908	1.02467	0.768352	0.591119	-0.873441	0.534722	-0.534722
DTX4	-0.0153879	0.498013	-1.02131	-0.869729	-0.285845	1.69426	-0.440849	0.440849
DVL2	1.34797	-0.865694	0.175879	-1.13104	0.947624	-0.474742	0.823825	-0.823825
DYNC1LI2	-0.934719	-0.108165	0.804448	1.58119	-0.852772	-0.489981	-0.327681	0.327681
DZIP1L	-0.247149	-1.69049	-0.28711	0.418145	1.2131	0.593506	0.226281	-0.226281
EBF3	0.279756	-1.16781	1.5962	-0.699449	-0.514654	0.505954	0.453769	-0.453769
ECE1	0.64575	-1.50769	0.127275	-0.93618	0.93881	0.732036	0.570612	-0.570612
ECHDC2	-1.20123	-0.237735	-0.89419	0.691588	0.159246	1.48233	-0.645393	0.645393
EDN1	0.516194	0.178213	-1.29618	1.31391	-1.0778	0.365655	-0.61926	0.61926
EEF2K	0.665922	-1.79942	0.00342019	0.48021	0.987069	-0.337198	0.552137	-0.552137
EFHD1	1.44342	-0.791796	-0.0589996	-0.879464	1.00118	-0.714345	0.795202	-0.795202
EHBP1	1.14932	-1.2464	0.879476	-0.796624	0.606018	-0.591781	0.87827	-0.87827
EHD2	1.07688	-1.81285	-0.194263	-0.0512243	0.364378	0.617082	0.415663	-0.415663
EHMT2	0.77527	-1.38854	-0.255273	1.4526	-0.542184	-0.0418726	-0.0073955	0.0073955
ELF4	0.112326	-0.352802	-1.45505	0.823896	-0.48262	1.35425	-0.608449	0.608449
ELOVL7	1.0484	0.631236	-1.14897	-1.11179	-0.332881	0.913998	-0.144482	0.144482
EME2	-0.734459	-0.960612	-0.501095	-0.0843041	1.72304	0.55743	0.162495	-0.162495
EML3	-1.13413	0.0987477	-0.828426	-0.390032	1.53046	0.723383	-0.144033	0.144033
EMX2	-0.49758	-1.00995	1.16952	0.933031	-1.10901	0.513989	-0.145689	0.145689
ENDOD1	0.2388	-1.09728	0.242242	1.66373	-0.950151	-0.0973453	-0.15637	0.15637
ENGASE	0.0567925	-0.7233	-0.760265	-0.908218	1.58262	0.752372	0.293049	-0.293049
ENKUR	-0.844322	-0.897623	1.7991	0.288903	-0.39806	0.0519972	0.185574	-0.185574
ENO2	-0.135932	-0.72295	-0.814077	-0.618928	0.518766	1.77312	-0.143748	0.143748
ENOSF1	-0.344443	1.03722	-1.38629	-0.825208	0.916712	0.602001	-0.271339	0.271339
ENTPD3	-0.80974	-0.779114	-0.801861	1.66446	0.189669	0.536589	-0.473977	0.473977
EOGT	-1.33386	0.491078	-0.112014	1.25595	-0.97044	0.669281	-0.805438	0.805438
EP300	1.22825	-1.39469	0.156882	-0.59183	1.00445	-0.403061	0.796526	-0.796526
EPB41L2	0.395091	-1.49378	1.20297	-0.230654	0.806223	-0.679849	0.801428	-0.801428
EPB42	-0.471677	-0.254392	-0.454824	-0.765976	-0.0325653	1.97943	-0.319689	0.319689
EPG5	-0.209096	-0.374224	0.0570448	1.94744	-0.783442	-0.63772	-0.311831	0.311831
EPHA2	-0.80695	0.342831	-0.375115	1.87756	-0.633876	-0.404446	-0.605313	0.605313
EPN2	1.04193	-1.54754	0.631326	-0.229675	0.780944	-0.676978	0.818066	-0.818066
ERCC3	1.65871	-0.285316	0.15275	-0.91591	0.442838	-1.05307	0.751432	-0.751432
ERG	-0.968018	-1.21822	0.991764	0.0865316	1.25183	-0.143889	0.425193	-0.425193
ESR1	0.601102	-1.09432	0.984499	-1.00115	1.07335	-0.563476	0.886317	-0.886317
EVC	0.74443	-1.17568	0.76732	-0.810502	1.16062	-0.68619	0.890791	-0.890791
EXOC3	1.29812	0.412696	-1.75705	-0.00501152	0.192959	-0.14171	-0.0886583	0.0886583
EXOSC10	-0.230648	-0.739574	-0.837285	0.811093	-0.629732	1.62615	-0.565888	0.565888
EZH1	-0.695757	0.0613131	-1.42176	0.0341678	1.48286	0.539185	-0.211555	0.211555
FAM107A	-0.404373	-1.7426	0.998911	-0.108824	0.617011	0.639878	0.40385	-0.40385
FAM156A	-0.0801251	-1.84481	-0.0276626	0.522041	0.332038	1.09851	0.07475	-0.07475
FAM160A2	-0.506185	-0.633339	-1.20206	0.0990135	0.689226	1.55334	-0.339673	0.339673
FAM160B2	-0.682952	0.568773	-1.4895	1.1674	-0.298334	0.734613	-0.823594	0.823594
FAM180A	-0.248866	-0.0941893	1.73209	0.0498337	-0.0518357	-1.38704	0.477131	-0.477131
FAM189A2	1.20679	-0.0691618	-0.80204	-0.80204	-0.80204	1.26849	-0.132429	0.132429
FAM193A	0.677919	-1.27102	-0.490828	-0.790692	1.32572	0.548899	0.504271	-0.504271
FAM193B	-0.657261	-0.093124	-1.41364	-0.0919561	1.06559	1.19039	-0.335103	0.335103
FAM219A	-0.400788	-0.352063	-0.751994	-0.122283	-0.372017	1.99914	-0.508266	0.508266
FAM222B	1.16719	-1.48805	0.937589	-0.629139	0.27861	-0.266202	0.794463	-0.794463
FAM229A	-0.514609	-0.299254	-0.321875	-1.25056	1.44898	0.937324	0.204165	-0.204165
FAT4	-0.176523	-1.43362	1.02863	-0.0936465	1.23725	-0.562094	0.696452	-0.696452
FAXDC2	0.461035	-0.885398	1.76268	-0.68924	0.000112558	-0.649185	0.741274	-0.741274
FBRS	0.729826	-1.30275	-0.261359	-0.949748	1.21487	0.569161	0.561113	-0.561113
FBRSL1	0.139695	-0.6266	-1.0289	-0.691295	1.65839	0.548715	0.256393	-0.256393
FBXO21	0.420501	-1.02878	1.2699	-0.754656	0.934865	-0.841822	0.875088	-0.875088
FBXO31	-1.22063	0.219418	-0.55126	0.626101	-0.617779	1.54415	-0.796555	0.796555
FBXW8	0.522507	-1.57816	0.728316	-0.700752	1.09989	-0.0718018	0.78357	-0.78357
FCHSD1	-0.0296932	-0.639116	-0.829502	-0.909218	1.50192	0.905605	0.214243	-0.214243
FGD5	-0.571048	-0.73835	-0.286731	-0.641466	1.87101	0.36659	0.337742	-0.337742
FGF2	-0.0051611	0.476913	1.38657	-0.883247	0.40533	-1.38041	0.595581	-0.595581
FGF9	-0.503104	-0.503104	2.02652	-0.26621	-0.251002	-0.503104	0.424139	-0.424139
FGFR1	1.05748	-1.52528	-0.014934	-0.637988	1.07027	0.0504539	0.70427	-0.70427
FGFRL1	0.233687	-1.32266	1.4193	-0.343237	0.735724	-0.722816	0.796236	-0.796236
FHL1	-0.887195	1.46558	-0.785169	0.988549	-0.678694	-0.103069	-0.783686	0.783686
FIGN	-0.964135	0.650748	-0.155485	1.61643	-0.993008	-0.15455	-0.704209	0.704209
FKBP9	1.15049	-1.17894	0.914347	-0.885198	0.577081	-0.57778	0.88064	-0.88064
FLCN	-0.0951948	1.20501	-1.40167	0.939679	-0.814507	0.16668	-0.770457	0.770457
FLNB	0.559386	-1.47218	-0.378606	1.42067	0.353567	-0.482835	0.178116	-0.178116
FLNC	0.759844	-1.28292	1.09818	-0.318931	0.719325	-0.975501	0.859117	-0.859117
FLT1	-0.138641	-0.655949	-0.126067	-0.407838	1.98444	-0.655949	0.573245	-0.573245
FLYWCH1	0.760748	0.241896	-1.53502	-0.949385	0.801362	0.680401	0.00902926	-0.00902926
FNBP4	-0.17129	-1.08139	0.432583	-0.864759	1.693	-0.00814201	0.651431	-0.651431
FNIP1	-0.53012	1.84807	-0.395955	0.196435	-1.05055	-0.0678798	-0.658874	0.658874
FNIP2	0.841446	-0.678502	-1.29394	-0.693461	0.834478	0.989984	0.127326	-0.127326
FOXC1	-0.214428	-1.44984	0.426619	-0.654692	1.42098	0.471364	0.544389	-0.544389
FOXC2	-1.2857	-0.1685	-0.0309686	1.61476	-0.657159	0.527568	-0.657942	0.657942
FOXJ2	0.0730332	-1.75193	1.03406	-0.359236	0.835959	0.168108	0.647685	-0.647685
FOXJ3	-0.818032	-1.22844	-0.565406	1.13454	0.490044	0.987297	-0.297798	0.297798
FOXO1	0.0571115	-1.08323	0.944069	-0.926181	1.38899	-0.380755	0.796723	-0.796723
FOXO6	0.584439	-0.701122	-1.62592	1.15021	0.407565	0.184832	-0.211305	0.211305
FOXP4	-1.00978	-1.26151	0.0658831	0.0366464	1.20987	0.958888	0.0886578	-0.0886578
FRMD3	-0.839912	-0.408382	-0.0209073	1.83339	-0.832939	0.26875	-0.564586	0.564586
FRMD7	0.179591	-0.915187	-0.316028	-0.537208	-0.319029	1.90786	-0.151822	0.151822
FRY	-0.228957	-0.886701	0.315124	-0.828188	1.82673	-0.198006	0.637632	-0.637632
FTSJ3	-0.491403	-0.328776	0.0880174	1.86784	-1.0723	-0.0633823	-0.491895	0.491895
FYCO1	0.827843	-1.00165	0.2774	0.555757	0.83398	-1.49333	0.646408	-0.646408
FZD4	-0.0946854	0.206238	-0.134556	-0.502227	-1.24407	1.76931	-0.491105	0.491105
FZD8	-0.176524	-1.1117	1.3742	-0.418056	1.06455	-0.732467	0.754074	-0.754074
GABBR1	-0.705793	-0.859944	-0.058064	-0.562384	1.8187	0.367488	0.351613	-0.351613
GABRE	-0.8058	-0.523489	0.459022	-0.908953	1.74311	0.0361054	0.465445	-0.465445
GALNT8	-0.948654	-0.388675	0.0994925	0.523695	1.6628	-0.948654	0.271211	-0.271211
GATAD2B	0.715552	-1.59516	0.769951	-0.604586	0.961289	-0.247049	0.815597	-0.815597
GBA2	-0.65324	0.677253	-1.54706	-0.282719	0.976583	0.829188	-0.407907	0.407907
GBF1	0.30836	-1.1848	-0.477999	1.69872	-0.576968	0.232695	-0.248869	0.248869
GDF6	-1.51781	0.162369	1.45674	0.382226	0.1356	-0.619127	0.024844	-0.024844
GDI1	1.14052	-0.726556	-0.482479	-1.32915	1.01122	0.386444	0.55642	-0.55642
GDPD5	0.683933	-1.07426	0.92042	-0.697532	1.09131	-0.923864	0.898553	-0.898553
GEMIN5	0.323785	-0.48834	0.557643	1.40711	-0.289603	-1.51059	0.197275	-0.197275
GFOD1	0.0522418	0.462163	-0.455268	1.31047	0.295291	-1.6649	-0.0359115	0.0359115
GGT7	-0.909961	-0.346864	-0.520527	-0.706878	1.55463	0.929598	0.0413814	-0.0413814
GIGYF1	0.115263	-0.380263	-1.60545	0.133025	1.47601	0.261409	-0.00472375	0.00472375
GLB1L2	0.25945	-0.964363	-1.02547	-0.246892	0.304772	1.6725	-0.153749	0.153749
GLDN	1.36811	0.195335	0.922306	-0.558417	-1.15121	-0.776117	0.379733	-0.379733
GLG1	0.783115	-1.24412	0.700898	-0.771121	1.16336	-0.632139	0.882459	-0.882459
GLIS1	-1.34713	1.23727	-0.279878	-0.545	1.11628	-0.181537	-0.170245	0.170245
GLIS2	-0.608179	-1.68788	0.679413	0.551894	0.0590203	1.00573	0.0434183	-0.0434183
GLYR1	0.590447	1.31308	-1.39611	0.288744	-0.93555	0.139385	-0.580405	0.580405
GNAZ	0.97694	0.120023	-1.92849	0.0834685	0.261456	0.486602	-0.230031	0.230031
GOLGA8A	-0.820281	-0.467054	-0.35965	-0.72645	1.75033	0.623104	0.190133	-0.190133
GOLGA8B	-1.20166	-0.500298	0.0103287	-0.632006	1.48318	0.840449	0.0972851	-0.0972851
GOLGA8N	-0.574376	-0.55196	-0.32559	-0.811629	1.85249	0.411068	0.317507	-0.317507
GOLGB1	0.413329	-1.43114	1.2968	-0.209877	0.691005	-0.760112	0.800377	-0.800377
GP1BA	0.0645753	-0.916152	-0.448029	0.375767	-0.839585	1.76342	-0.40768	0.40768
GPAM	-1.08498	1.04531	1.21936	-0.180518	0.0968976	-1.09606	0.0770898	-0.0770898
GPATCH8	1.09024	-1.66448	0.584331	-0.445665	0.668314	-0.23274	0.780962	-0.780962
GPC1	0.269786	1.37994	-0.887729	0.859627	-1.11176	-0.509855	-0.576569	0.576569
GPM6B	1.25748	-0.656033	1.3026	-0.636921	-0.429693	-0.837433	0.710129	-0.710129
GPR107	1.12213	-1.2517	1.25779	-0.515951	-0.0430745	-0.569189	0.778947	-0.778947
GPR146	0.240664	-1.04351	-0.969895	-0.445182	0.752095	1.46583	0.00762123	-0.00762123
GPR17	-0.148328	-1.15692	0.952124	-1.20387	0.589297	0.967693	0.464364	-0.464364
GPR75	-0.650602	-1.1722	-0.448802	0.927853	1.45848	-0.114729	0.119692	-0.119692
GPRASP1	0.00447663	-1.53459	-0.761761	0.65605	0.432963	1.20286	-0.108107	0.108107
GPSM1	-1.27532	-0.678787	-0.0114171	0.719419	1.5227	-0.276594	0.0786537	-0.0786537
GRIPAP1	0.847575	-1.1345	-0.633632	-0.107948	1.52729	-0.498778	0.580409	-0.580409
GSE1	-0.880247	0.0173581	-1.03561	1.51676	-0.433206	0.814944	-0.783022	0.783022
GSN	2.01399	-0.444694	-0.444697	-0.65162	-0.159424	-0.313555	0.469956	-0.469956
GSTM2	0.804543	-1.18343	1.16368	-0.857066	0.692218	-0.619941	0.886813	-0.886813
GUCA1B	-0.40013	-0.508119	0.86568	-0.435509	1.56726	-1.08919	0.677604	-0.677604
HACE1	-0.193512	0.17304	1.45161	-1.65005	-0.0890542	0.307973	0.38968	-0.38968
HCN3	-0.844588	-0.156871	-0.192778	-0.74285	0.0206727	1.91641	-0.338898	0.338898
HDAC7	-0.662637	-0.0772188	-1.12921	1.23273	-0.564372	1.20071	-0.785406	0.785406
HECTD3	-0.395702	0.378744	-1.54853	0.92761	-0.467861	1.10574	-0.804032	0.804032
HELZ2	0.844318	-0.0905739	-1.36431	-1.01508	0.631339	0.994298	0.0371173	-0.0371173
HEPH	-1.41978	-0.99959	1.22975	0.409462	0.370111	0.410048	0.0600267	-0.0600267
HERC1	1.00945	-1.36591	1.15268	-0.261689	0.269056	-0.803585	0.810395	-0.810395
HGS	-0.0146164	0.55802	-1.83211	0.857989	-0.286074	0.716791	-0.710933	0.710933
HGSNAT	0.939061	-1.22512	1.36315	-0.755494	0.100516	-0.422115	0.80091	-0.80091
HIF3A	0.420276	-1.00026	-1.3172	0.0716798	0.456451	1.36906	-0.146826	0.146826
HIP1	0.340947	-1.12135	1.22003	-0.6446	1.0248	-0.819826	0.861927	-0.861927
HIP1R	-0.0853324	1.04903	-1.69573	0.887196	0.252267	-0.407427	-0.509599	0.509599
HIVEP2	1.03763	-1.35866	0.181956	-0.52011	1.21177	-0.552588	0.810453	-0.810453
HMGXB3	-0.0609258	1.04994	-1.29895	-0.408548	-0.584592	1.30307	-0.648154	0.648154
HNRNPA1L2	0.133561	-1.35031	1.74529	-0.0808408	-0.168872	-0.27883	0.569993	-0.569993
HNRNPUL2	0.211574	-1.48836	0.78279	-0.926998	1.06988	0.351118	0.688081	-0.688081
HOXA13	1.0469	-0.944448	-0.960362	-0.77901	0.550959	1.08596	0.2125	-0.2125
HOXA2	-0.0722063	-0.900827	-0.336599	-0.939397	1.6983	0.550725	0.429833	-0.429833
HOXA6	-0.172075	-1.3648	-0.743698	0.696514	0.153714	1.43034	-0.25402	0.25402
HOXB3	-0.288083	-0.533312	-0.829715	-0.31016	-0.000351588	1.96162	-0.372717	0.372717
HOXD4	-0.832944	-0.832944	0.455376	1.58002	-0.832944	0.463434	-0.403504	0.403504
HOXD9	-1.24909	0.0114344	-0.989514	0.377792	0.373469	1.47591	-0.621711	0.621711
HPX	0.618234	-1.0184	0.242092	-0.774652	1.58148	-0.648756	0.813935	-0.813935
HRCT1	1.66117	-1.03398	0.65309	-0.746725	-0.116892	-0.416663	0.732456	-0.732456
HSF4	-0.254018	-1.056	-0.582006	-0.505782	0.779952	1.61786	-0.0186906	0.0186906
HSPA12A	0.135726	-0.423562	1.87272	-0.235597	-0.268888	-1.0804	0.579854	-0.579854
HSPB7	-0.129041	-0.613845	1.06992	1.39813	-0.959886	-0.765281	-0.00633605	0.00633605
HSPG2	0.333284	-1.03512	-1.15671	0.727825	1.37483	-0.244099	0.183799	-0.183799
HTT	0.521178	-1.10789	0.86031	1.23184	-0.517953	-0.987481	0.287845	-0.287845
HUWE1	1.32713	-1.39415	0.283356	0.473657	0.26835	-0.958342	0.626278	-0.626278
IBSP	-0.510939	-1.19563	1.13599	-0.210408	1.3042	-0.523209	0.643082	-0.643082
IDUA	-0.83325	-0.125691	-0.610714	1.86236	-0.596748	0.304046	-0.680237	0.680237
IFITM10	-0.532026	-1.16316	1.64215	-0.421401	-0.197089	0.671528	0.304343	-0.304343
IFT122	-1.0589	-1.17081	0.647348	1.2571	-0.314698	0.639964	-0.242084	0.242084
IFT172	-0.705076	-1.14884	-0.44975	1.62499	0.104955	0.573722	-0.349957	0.349957
IFT81	0.830749	-1.31283	0.362486	-1.23654	0.73444	0.621695	0.642558	-0.642558
IGF1R	0.683297	-1.0603	0.715742	-0.872412	1.2651	-0.731425	0.888047	-0.888047
IGF2	1.3778	-0.222531	0.787622	-0.950436	0.223485	-1.21594	0.796303	-0.796303
IGFBP3	0.0860465	1.55328	-1.54951	-0.150328	-0.247694	0.308208	-0.570386	0.570386
IGSF9B	-0.743483	-0.775993	-0.961378	0.17116	1.48964	0.82005	-0.071739	0.071739
INO80D	0.309893	-1.39864	0.432324	-0.796632	1.45816	-0.00510709	0.733459	-0.733459
INPP5A	0.798207	1.03889	0.779046	-0.363781	-1.18838	-1.06398	0.129623	-0.129623
INPP5E	0.630222	-1.06716	-0.350935	-1.17324	0.836686	1.12442	0.371991	-0.371991
INPPL1	0.139433	-1.48393	0.069255	-0.455284	1.59639	0.134135	0.601692	-0.601692
INTS3	0.0503353	-1.88347	0.255097	-0.0582441	0.964483	0.671798	0.423305	-0.423305
IQCE	1.345	0.0532473	0.196488	0.700476	-1.2591	-1.03611	0.0941288	-0.0941288
IQSEC1	0.936069	-1.5572	0.439543	-0.551789	1.04944	-0.316064	0.808352	-0.808352
IRS1	1.68458	-0.852729	-0.145157	-0.804727	0.675221	-0.557188	0.738215	-0.738215
IRX6	0.125351	-1.10236	0.0610735	-0.691239	1.8026	-0.195417	0.663007	-0.663007
ISYNA1	1.15806	-0.286033	-0.652767	-0.758102	1.37194	-0.833095	0.625743	-0.625743
ITGA10	-0.899394	0.0268987	0.421555	1.67896	-1.08291	-0.145114	-0.520249	0.520249
ITGA11	-0.191925	-1.46743	1.54721	0.148875	0.424989	-0.461714	0.593423	-0.593423
ITGA2	0.105418	-0.762094	1.81366	-0.286011	0.137953	-1.00892	0.685675	-0.685675
ITGA3	1.31116	0.36477	-0.436986	0.8534	-0.905473	-1.18687	-0.0104326	0.0104326
ITGA5	-0.584254	-0.96666	-0.899379	1.22808	0.0365421	1.18567	-0.482364	0.482364
ITGA7	1.15032	-0.831453	-0.0576704	-1.11329	1.25661	-0.404518	0.783087	-0.783087
ITGB1BP2	-1.09665	0.654734	-0.277108	0.438318	-1.09665	1.37736	-0.823471	0.823471
ITGB3	1.32202	1.22674	-0.705789	-0.582582	-0.389838	-0.870551	0.0754648	-0.0754648
ITGB4	1.20799	-0.873461	0.726202	-1.16163	0.719778	-0.618875	0.884655	-0.884655
ITPKB	-0.675829	-0.859861	-0.235974	1.76254	0.570967	-0.561841	-0.113612	0.113612
IVD	0.794602	1.30178	-1.03266	-1.24535	-0.0509278	0.232565	-0.09633	0.09633
JADE1	-1.43244	0.13067	0.439296	1.41432	-0.816973	0.265127	-0.603374	0.603374
JAG1	-0.318375	-0.703692	1.46254	0.385501	0.529006	-1.35498	0.557724	-0.557724
JAG2	1.69824	-0.59261	-0.245796	-1.0288	0.646476	-0.477511	0.69964	-0.69964
JAM3	-1.36603	-0.881438	-0.237816	0.679106	0.580504	1.22568	-0.341116	0.341116
JMJD7-PLA2G4B	-0.996339	-0.689668	-0.888527	0.319933	0.905697	1.3489	-0.32639	0.32639
JPH2	0.00788874	-1.52748	1.56187	-0.183676	0.373677	-0.232283	0.647811	-0.647811
KANK1	0.200834	0.347658	-1.84059	0.656175	-0.321678	0.957598	-0.65381	0.65381
KANK3	0.363714	1.81449	-0.231555	-0.856482	-0.233682	-0.856482	-0.033841	0.033841
KANSL1	0.361755	-1.63745	0.35951	-0.439238	1.36587	-0.0104399	0.695711	-0.695711
KANSL1L	0.0586422	-0.283548	1.0099	-1.523	1.1766	-0.438596	0.74838	-0.74838
KAT2A	-1.12504	-0.559035	-0.972522	1.09286	0.610159	0.953585	-0.495802	0.495802
KCNAB1	-1.39862	1.69142	0.0438405	0.109419	-0.409571	-0.0364883	-0.588116	0.588116
KCNT2	-0.222507	-1.41673	0.873272	-0.726174	1.26578	0.22636	0.638848	-0.638848
KCTD13	0.454554	-1.3302	-0.25814	-0.88172	1.28045	0.735058	0.492289	-0.492289
KDM3A	-1.04292	0.459772	-0.541714	-1.03054	1.18404	0.971355	-0.133531	0.133531
KDM4B	-0.853639	0.0620941	-1.07978	0.862073	-0.456893	1.46615	-0.796772	0.796772
KDM5C	0.754818	-1.28098	-0.99455	-0.183891	1.24825	0.45635	0.336174	-0.336174
KDM6B	0.169347	-0.889864	-0.145024	-0.845403	1.85047	-0.13953	0.624933	-0.624933
KDR	1.21163	-1.18281	1.25579	-0.49018	-0.391552	-0.402885	0.691957	-0.691957
KIAA0319L	-0.0898387	-0.0408378	-1.25229	1.60997	-0.747635	0.52063	-0.696588	0.696588
KIAA0556	0.802891	-1.34024	-1.08683	0.436688	1.08475	0.102744	0.266936	-0.266936
KIAA0753	-0.371355	-1.5963	-0.250228	1.17461	0.926226	0.117043	0.101548	-0.101548
KIAA0895L	-0.996359	-0.772607	-0.573908	-0.129957	1.17878	1.29405	-0.130495	0.130495
KIAA1109	0.369076	-1.62255	1.18792	0.073063	0.63444	-0.641947	0.730479	-0.730479
KIAA1217	1.49465	-1.58583	0.35297	-0.286323	0.161065	-0.136535	0.669563	-0.669563
KIAA1549	1.10376	-0.97557	0.735201	-0.635777	0.85039	-1.078	0.896449	-0.896449
KIAA1671	1.6751	-1.11747	0.547175	-0.181896	-0.155731	-0.767178	0.688848	-0.688848
KIDINS220	-0.557113	-1.51109	1.28077	0.210492	0.815313	-0.238372	0.51299	-0.51299
KIF13A	1.18735	-0.854964	1.20516	-0.432983	-0.000315415	-1.10425	0.797397	-0.797397
KITLG	1.42386	0.835017	0.250104	-0.922079	-0.565989	-1.02091	0.369324	-0.369324
KLC1	0.537444	-1.09229	-0.204167	-0.344545	1.72411	-0.620557	0.685797	-0.685797
KLF7	-0.560383	-1.67139	0.348429	0.00353031	0.98543	0.894387	0.257825	-0.257825
KLHL29	-0.57263	-0.885142	-0.907232	1.5734	0.0238916	0.767708	-0.485323	0.485323
KLHL3	0.341473	-1.74918	1.1002	-0.391743	0.677792	0.0214526	0.706489	-0.706489
KMT2D	1.43913	-1.43908	-0.19237	0.364729	0.493913	-0.666324	0.580224	-0.580224
KRIT1	-0.444197	-1.53134	1.2866	-0.383382	0.335625	0.73669	0.392677	-0.392677
L1CAM	-0.0998537	-1.81433	0.365714	0.139646	1.23006	0.17876	0.49864	-0.49864
L3MBTL1	-0.265848	-0.830868	-0.00639705	-0.710261	1.92901	-0.115641	0.552256	-0.552256
LAMA2	-0.440514	-0.807509	1.59314	0.871564	-0.367494	-0.849185	0.26171	-0.26171
LAMA5	1.59028	-0.847439	-0.14224	-0.677326	0.835524	-0.758793	0.761186	-0.761186
LAMC3	1.38929	-0.671295	-0.27951	-0.888033	1.13348	-0.683923	0.747751	-0.747751
LATS2	1.37887	-1.59442	0.399498	-0.333137	0.445287	-0.296105	0.74122	-0.74122
LCAT	-0.941926	-0.434287	-1.15134	0.326446	1.28706	0.914047	-0.268736	0.268736
LDB3	1.67976	-0.0773894	-1.07033	0.509812	-0.855725	-0.186126	-0.0820989	0.0820989
LENG8	-0.785758	-0.936925	-0.210274	-0.304452	1.7763	0.461112	0.260088	-0.260088
LGI4	1.33967	-1.10284	0.266754	-0.999583	0.878756	-0.382752	0.828392	-0.828392
LGR5	2.04124	-0.408248	-0.408248	-0.408248	-0.408248	-0.408248	0.408248	-0.408248
LHX4	0.640033	-0.618833	0.00712697	-0.919024	1.66315	-0.772453	0.770103	-0.770103
LIFR	0.165451	-1.48562	0.947991	-0.627391	1.19752	-0.197952	0.770322	-0.770322
LIMA1	-0.458773	-1.66436	0.781392	-0.077908	1.15429	0.265351	0.492304	-0.492304
LIMCH1	1.57208	-1.23826	-0.244524	-0.815349	0.30336	0.422691	0.543639	-0.543639
LIMS2	0.413762	-0.968516	0.89387	-0.910797	1.31025	-0.738565	0.872626	-0.872626
LMBR1L	-1.16474	1.26309	-0.848603	0.0349645	-0.374068	1.08935	-0.795804	0.795804
LMO7	1.87032	-0.895001	0.231689	-0.622832	-0.0815556	-0.50262	0.673484	-0.673484
LMOD1	1.19936	-1.49014	0.871178	-0.753032	0.0787152	0.0939189	0.716417	-0.716417
LMTK2	1.27325	-1.43916	0.618076	-0.510168	0.60506	-0.54705	0.832127	-0.832127
LONP2	0.647473	-1.82937	1.07359	-0.168673	0.22449	0.052485	0.648518	-0.648518
LOXL4	0.68484	-0.971952	1.51854	-0.807551	0.306893	-0.730768	0.836757	-0.836757
LPAR2	-1.01162	-1.0324	-0.4087	0.131011	1.28617	1.03554	-0.0447161	0.0447161
LPIN3	-0.580979	-0.998106	-0.453502	-0.423192	1.59262	0.863156	0.186048	-0.186048
LRIG1	0.706598	-0.728271	-0.154218	-1.1831	1.58044	-0.221454	0.710941	-0.710941
LRIG2	0.309158	-1.29357	0.581448	-0.91846	1.42764	-0.106215	0.772749	-0.772749
LRIG3	-0.593512	-0.822527	-0.648484	-0.189179	0.428536	1.82517	-0.271153	0.271153
LRP4	-0.107865	-0.448364	0.995701	-1.03378	1.42645	-0.83214	0.771428	-0.771428
LRP5	-0.474324	-1.38682	-0.308631	1.53029	0.643972	-0.0044842	-0.0463277	0.0463277
LRP6	0.501809	-0.979144	1.1576	-0.913255	1.00763	-0.774641	0.889014	-0.889014
LRRC37A3	1.08398	-1.25068	0.691176	-0.630197	0.883617	-0.777902	0.886259	-0.886259
LRRC39	-0.441719	-0.812063	-0.812063	-0.101566	1.83432	0.333092	0.193512	-0.193512
LRRC66	1.10045	-1.48228	0.368508	-0.408736	0.985607	-0.563545	0.818187	-0.818187
LRRK2	0.593989	-1.17994	1.10429	-0.916502	0.946153	-0.547987	0.881476	-0.881476
LSMEM1	0.802035	0.0585065	-0.0864109	-0.400848	1.24784	-1.62113	0.65449	-0.65449
LSS	0.737051	-0.944708	-1.16164	0.0186012	-0.131596	1.4823	-0.185396	0.185396
LTBP1	-0.520815	-0.99034	1.55867	0.817096	-0.0600777	-0.804533	0.325926	-0.325926
LTBP2	-0.435541	-0.548875	1.33478	0.885408	0.1502	-1.38597	0.349812	-0.349812
LTBP4	-0.581563	-1.18957	0.923534	1.3548	0.209913	-0.717114	0.183961	-0.183961
LTF	-0.354129	-0.264496	1.61237	-1.30279	0.634037	-0.324993	0.63076	-0.63076
LY6G5B	-1.00271	-0.925734	-0.327919	-0.0845422	1.54661	0.794299	0.0719923	-0.0719923
LYST	1.90079	-0.615078	0.269335	-0.280116	-0.487586	-0.787349	0.560847	-0.560847
LZTR1	-0.135872	-0.776205	-1.31762	-0.0674257	1.14987	1.14725	-0.101207	0.101207
LZTS2	-0.115941	0.196453	-1.61435	0.947396	-0.504377	1.09082	-0.744889	0.744889
MAATS1	1.08211	-0.479297	-1.36052	0.37262	1.0687	-0.683618	0.263432	-0.263432
MACF1	0.671339	-1.63636	0.903329	0.436037	0.443476	-0.817824	0.672715	-0.672715
MAFK	0.572819	-1.15082	0.370423	-0.351304	1.48996	-0.931078	0.811066	-0.811066
MAGEE1	-1.12868	-1.19604	1.14795	0.242381	-0.0239641	0.958354	-0.00156364	0.00156364
MAGI1	-0.872552	0.318538	0.18383	1.76795	-0.677941	-0.719824	-0.455555	0.455555
MAMLD1	1.30389	-0.940905	0.513368	-0.90432	0.830328	-0.802361	0.882529	-0.882529
MAN2A2	-0.685826	0.13442	-1.44639	1.36798	-0.103318	0.73313	-0.745178	0.745178
MAN2C1	-1.12264	-0.236336	-0.897963	-0.0933199	1.40634	0.943919	-0.204754	0.204754
MANSC1	0.129319	-0.465754	1.00379	1.18636	-1.48952	-0.364196	-0.118803	0.118803
MAOA	-0.162989	-0.686269	1.9	0.139729	-0.308568	-0.881899	0.476146	-0.476146
MAP1A	0.943065	-1.35149	0.794503	-0.590397	0.903229	-0.698911	0.880266	-0.880266
MAP3K3	1.34153	-0.386129	0.367895	-0.862623	0.785934	-1.24661	0.831787	-0.831787
MAP3K4	1.33199	-1.1372	0.474728	-0.891915	0.777141	-0.554748	0.861287	-0.861287
MAP3K7CL	0.766089	-0.693944	1.10753	-1.01618	0.829009	-0.992505	0.900875	-0.900875
MAP4	0.550428	-1.80024	1.09032	-0.035767	0.449073	-0.25382	0.696608	-0.696608
MAP6	1.02478	-1.10467	1.1589	-1.07349	0.33936	-0.344878	0.841012	-0.841012
MAPK8IP3	-1.08874	-0.426674	-0.860019	0.0844282	1.50709	0.783911	-0.147222	0.147222
MAPKBP1	-0.10426	-0.185783	-1.37398	1.62053	-0.447158	0.490654	-0.641799	0.641799
MAPRE3	-0.676282	0.905338	-0.990634	0.0824849	-0.779439	1.45853	-0.815452	0.815452
MARK1	-0.344334	-1.29673	0.0350225	-0.703221	1.29219	1.01707	0.327626	-0.327626
MASP2	-0.72162	0.317342	-1.03296	1.6219	-0.668496	0.483838	-0.807693	0.807693
MAST2	-0.0213187	-1.65029	-0.385535	1.02384	1.03884	-0.00553243	0.210661	-0.210661
MAST3	0.728323	-1.72841	0.767074	-0.248268	0.839099	-0.357821	0.778165	-0.778165
MAU2	1.00586	-1.26863	-0.267968	-1.03775	0.780454	0.788033	0.506114	-0.506114
MAVS	0.933619	-1.30754	0.941536	0.510467	0.0485382	-1.12662	0.641231	-0.641231
MBD6	-0.642515	-0.00594101	-1.14578	0.377091	-0.322921	1.74007	-0.70374	0.70374
MCAM	-0.754425	-1.37318	0.546023	-0.44322	1.03109	0.993714	0.27423	-0.27423
MCF2L	0.15805	-0.37382	-1.02564	-1.023	1.42633	0.838082	0.186247	-0.186247
MCM3AP	-0.106836	-0.85883	-0.626013	1.92603	-0.383514	0.0491605	-0.372121	0.372121
MDC1	-0.130228	-1.89352	0.0101043	0.798552	0.503581	0.711509	0.127819	-0.127819
MECOM	-0.89975	-0.959139	0.900368	0.227432	1.40016	-0.669073	0.466927	-0.466927
MED13L	0.323192	-1.54791	0.819137	-0.37849	1.22207	-0.438001	0.788132	-0.788132
MED14	0.264622	-1.53897	1.45047	-0.386299	0.483483	-0.273303	0.732858	-0.732858
MED15	-0.00754531	-0.69159	-1.16994	1.18081	-0.528143	1.21641	-0.568542	0.568542
MED24	0.0514123	0.441486	-1.12319	1.0973	-1.28892	0.821908	-0.786897	0.786897
MEGF8	0.997018	-1.60087	0.415765	0.411358	0.62191	-0.845183	0.678231	-0.678231
MEGF9	0.455408	-0.835996	1.81885	-0.531858	-0.238895	-0.667507	0.678454	-0.678454
MFGE8	0.753446	1.67309	-0.759025	-0.265895	-0.745648	-0.655965	-0.250409	0.250409
MGAM	-0.543503	0.0875604	-0.473551	1.97998	-0.5428	-0.507684	-0.519951	0.519951
MGLL	1.44016	-0.560059	0.972879	-0.453825	-0.209165	-1.18999	0.734624	-0.734624
MICAL2	-0.381733	-1.25638	1.53428	0.283311	0.552688	-0.732162	0.56841	-0.56841
MICAL3	1.29485	-1.1879	0.00223698	-0.664344	1.08899	-0.533844	0.795362	-0.795362
MICALL2	-0.599633	-1.2746	-0.110259	-0.398148	1.24906	1.13358	0.179722	-0.179722
MINK1	0.441603	-0.787413	-1.41502	1.1167	-0.281345	0.925476	-0.418255	0.418255
MLLT1	1.43184	-1.12044	-0.0561553	-0.732304	0.960074	-0.483016	0.778585	-0.778585
MLLT6	0.554602	-1.52603	-0.0651654	-0.717702	1.26799	0.486304	0.58581	-0.58581
MMP15	-0.408248	0.673561	-0.634436	1.67569	-1.05054	-0.256029	-0.697742	0.697742
MMP25	-0.267589	-1.32149	-0.164105	-0.550092	1.46784	0.835437	0.345383	-0.345383
MMRN2	-0.956943	1.06575	1.22761	-0.678051	0.289246	-0.947617	0.186639	-0.186639
MN1	0.241024	-1.97234	0.27195	0.32402	0.905572	0.229769	0.472849	-0.472849
MNT	0.967665	-1.58107	-0.649592	-0.188564	0.563264	0.888292	0.293779	-0.293779
MPDZ	1.29549	-0.906966	0.75943	0.104245	0.124736	-1.37694	0.726553	-0.726553
MPZ	0.734135	0.393733	-1.48861	-0.90744	0.153212	1.11497	-0.20042	0.20042
MRVI1	1.84315	-0.929696	-0.492735	-0.315889	-0.494222	0.389387	0.285399	-0.285399
MST1	-0.516293	-1.18009	0.243325	-0.570499	1.68585	0.337711	0.470961	-0.470961
MT-ND5	-1.91432	-0.118579	0.4005	0.656426	0.13177	0.844199	-0.460682	0.460682
MT-ND6	-1.59988	-0.337664	-0.44307	0.649044	0.542035	1.18954	-0.500305	0.500305
MTA1	-1.13466	0.127357	-1.19617	1.30514	0.167543	0.730783	-0.721094	0.721094
MTMR11	-0.437447	-1.45966	0.114543	-0.402772	1.3323	0.853029	0.336467	-0.336467
MTMR3	-0.930339	-0.397299	-1.17375	0.531916	0.550811	1.41866	-0.51776	0.51776
MTMR4	-1.33984	-0.570067	-0.380494	0.745713	0.0702099	1.47447	-0.55004	0.55004
MTR	0.168373	-1.64445	0.809746	1.13374	0.095799	-0.563202	0.357973	-0.357973
MTUS1	-0.849935	-1.04716	-0.124968	-0.387409	0.967446	1.44202	-0.00248557	0.00248557
MUC20	0.740437	-0.487044	1.68151	-0.342201	-0.768038	-0.824666	0.551304	-0.551304
MYH11	1.04222	-0.869395	-0.274101	-0.865011	1.4495	-0.483215	0.739207	-0.739207
MYH9	0.861301	-1.46682	0.734262	-0.2784	0.9347	-0.785043	0.843421	-0.843421
MYL4	1.75344	-0.692584	-0.736536	-0.777287	0.539959	-0.0869887	0.518953	-0.518953
MYLK	-0.368742	0.129387	0.12117	1.70738	-1.36674	-0.222447	-0.538105	0.538105
MYO15B	-0.821488	-0.650427	-0.746748	-0.320955	1.36097	1.17864	-0.0690874	0.0690874
MYO18A	1.79429	-1.02125	-0.239044	-0.593899	0.433625	-0.373723	0.662958	-0.662958
MYO19	-0.997395	0.969686	-1.27507	1.14146	-0.167492	0.328811	-0.813319	0.813319
MYO1C	-0.480259	-0.194562	-0.85107	1.83693	-0.696116	0.385076	-0.675815	0.675815
MYO5C	-0.598002	-0.598002	0.600722	-0.598002	1.79129	-0.598002	0.598002	-0.598002
MYO7B	-0.357376	-0.884065	0.194917	0.126378	1.80421	-0.884065	0.547251	-0.547251
MYOC	1.93728	-0.917755	-0.223588	-0.241144	-0.0103586	-0.544437	0.567779	-0.567779
MYOCD	0.422023	-0.717671	1.47624	-0.773878	0.646925	-1.05364	0.848396	-0.848396
MYOM1	0.884595	0.809492	-1.25389	0.181552	0.628201	-1.24995	0.0863015	-0.0863015
MYOM3	-0.208969	-1.22988	1.02807	-0.217282	1.34901	-0.720953	0.722703	-0.722703
MYRIP	0.153781	-0.640247	1.94085	-0.521992	-0.251271	-0.681121	0.614453	-0.614453
MZF1	-0.758074	0.958428	-1.31903	-0.572212	0.915815	0.775078	-0.387098	0.387098
NBPF11	-0.657952	-0.917705	-0.87694	1.2149	0.0213687	1.21633	-0.504508	0.504508
NBPF15	-1.04646	0.0522838	-1.39527	0.96698	0.645491	0.776977	-0.598747	0.598747
NBPF3	-1.6209	-0.443264	-0.310413	0.918371	1.02489	0.431321	-0.302143	0.302143
NBPF9	-0.621101	0.382268	-1.31803	-0.123569	0.0328361	1.64759	-0.635431	0.635431
NCOR2	0.691021	-1.5915	-0.717708	0.606929	1.05099	-0.0397287	0.341433	-0.341433
NCR3LG1	0.119305	-0.642598	0.150589	-0.664987	1.8548	-0.817109	0.708231	-0.708231
NDEL1	-0.202929	1.52454	-0.955472	0.211259	-1.15771	0.580315	-0.772036	0.772036
NDNF	-0.449152	-0.29307	-0.825912	-0.919639	1.45602	1.03175	0.0603192	-0.0603192
NDOR1	-0.60563	0.506195	-1.54197	1.3902	-0.00684404	0.258052	-0.718149	0.718149
NDRG2	0.501611	-1.0512	-1.17615	0.24504	1.48323	-0.00253578	0.269566	-0.269566
NDRG4	-1.20672	0.367457	-0.759788	1.58285	-0.395623	0.411821	-0.787376	0.787376
NDST1	1.797	-0.947444	0.487581	-0.320849	-0.418566	-0.59772	0.622004	-0.622004
NEIL1	-0.397288	-0.763722	0.550282	-0.86196	1.76802	-0.29533	0.640337	-0.640337
NFAT5	0.11769	-1.34073	1.39106	-0.318827	0.830561	-0.679757	0.77977	-0.77977
NFE2	-0.912059	-0.912059	0.953681	0.835165	0.947332	-0.912059	0.329651	-0.329651
NFIX	-0.25983	-1.08886	-0.476632	1.10594	-0.649729	1.36911	-0.462064	0.462064
NHSL2	-0.435727	-0.867764	0.0173116	0.375517	1.77843	-0.867764	0.453337	-0.453337
NINL	-0.0757073	-1.34402	-0.913314	0.179618	1.11456	1.03886	0.0418452	-0.0418452
NISCH	-0.269367	-1.13292	-0.662701	-0.299009	1.58268	0.781319	0.216871	-0.216871
NLGN1	0.131149	-0.591625	1.84944	-0.77637	0.153044	-0.765633	0.711209	-0.711209
NLGN2	0.620912	-1.33061	0.206704	-1.03633	1.29046	0.248872	0.706025	-0.706025
NLRP1	-0.189791	-1.24225	0.943691	-0.237731	1.41426	-0.688183	0.722721	-0.722721
NNAT	-0.543961	0.299077	0.198167	-0.678898	1.75047	-1.02486	0.468226	-0.468226
NOD1	0.810047	-1.94085	0.338139	0.137009	0.666105	-0.0104473	0.604764	-0.604764
NOS3	1.36528	-0.525735	-0.948817	-1.09836	0.71286	0.494766	0.376442	-0.376442
NOTCH1	0.925229	-1.65548	-0.271568	0.440818	0.979755	-0.418756	0.544472	-0.544472
NOTCH2	-0.0655649	-1.74714	0.677635	0.0131634	1.2146	-0.0926881	0.608889	-0.608889
NOTCH3	-0.0169679	-0.4396	1.1554	-0.679546	1.21705	-1.23633	0.78516	-0.78516
NPEPPS	0.574201	-1.4643	1.49451	-0.537474	-0.0601667	-0.00676624	0.669515	-0.669515
NPHP3	-0.637373	-1.50178	0.240067	-0.196362	0.894817	1.20063	0.165837	-0.165837
NPIPA1	-0.805211	-1.12462	-0.357022	-0.0566392	0.847553	1.49594	-0.104893	0.104893
NPIPA5	1.43481	1.13239	-0.677213	-0.709815	-0.598646	-0.581527	0.0529845	-0.0529845
NPIPA7	-1.03272	-0.367882	-0.256214	1.91663	-0.0175139	-0.242302	-0.435483	0.435483
NPIPB11	-0.298288	-0.468587	1.9158	-0.109058	-0.0358809	-1.00398	0.52721	-0.52721
NPIPB3	-1.2993	-0.324257	-0.496393	1.26909	-0.277313	1.12817	-0.691002	0.691002
NPIPB4	-0.307879	-0.112531	-1.31766	0.713087	-0.517684	1.54267	-0.714408	0.714408
NPIPB5	-0.143447	0.77296	-1.21423	1.109	-1.13972	0.615442	-0.832466	0.832466
NPRL3	0.306453	-1.39275	-0.230419	0.5704	-0.701413	1.44773	-0.20846	0.20846
NPTXR	1.02682	1.39877	-0.264264	-0.251546	-1.08208	-0.827698	-0.106509	0.106509
NR2F2	-0.368084	-0.254703	-0.352183	1.73649	-1.20848	0.446956	-0.642916	0.642916
NR3C2	0.361913	1.57195	-0.856429	0.563255	-0.794431	-0.846256	-0.429649	0.429649
NRBP2	0.215898	-1.23909	0.913619	-0.701793	1.34421	-0.532848	0.824577	-0.824577
NRN1	-1.20957	-1.29471	0.695656	0.239888	0.573795	0.994949	0.0199587	-0.0199587
NTN1	1.29245	-0.957928	1.00842	0.266019	-0.682227	-0.926734	0.539548	-0.539548
NTRK2	0.490111	-2.00643	0.47073	0.456457	0.550041	0.0390956	0.503627	-0.503627
NUAK1	0.102685	-0.0203208	1.23072	0.815078	-0.541831	-1.58633	0.263857	-0.263857
NUMA1	0.531475	-1.48111	-0.416686	-0.388918	1.45143	0.303809	0.522074	-0.522074
NUMBL	-0.344606	-1.28968	0.0811364	-0.6421	0.656289	1.53896	0.13094	-0.13094
NUP188	1.23485	-0.940208	1.00264	-0.284105	0.197644	-1.21082	0.811711	-0.811711
NUP98	1.48136	-0.946947	0.854304	-0.0304777	-0.321571	-1.03667	0.671365	-0.671365
NXPH3	1.94323	-0.601188	0.180483	-0.648704	-0.320123	-0.553695	0.601195	-0.601195
NYNRIN	1.58992	-1.10031	-0.33135	-0.750463	0.750592	-0.158395	0.669722	-0.669722
OBSCN	0.257978	-1.32954	0.314315	0.601433	1.23832	-1.08251	0.603538	-0.603538
OBSL1	1.37496	-0.478809	-1.22942	-0.700321	0.931627	0.101964	0.359056	-0.359056
OCRL	0.360209	-1.23384	1.61943	-0.784564	0.25287	-0.214104	0.74417	-0.74417
OLFML2A	-0.0744755	-0.994606	1.89513	-0.0658289	-0.134759	-0.62546	0.561965	-0.561965
ORM1	1.89237	-0.181964	-0.635759	-0.640207	0.271354	-0.705793	0.509321	-0.509321
OSBP2	1.33136	-0.72968	0.733751	-1.00909	0.573419	-0.899761	0.879511	-0.879511
OSBPL5	1.05416	0.582681	-1.68065	-0.171929	-0.471716	0.687453	-0.366068	0.366068
OTUD7B	1.02817	-1.43539	0.88066	-0.742907	0.644008	-0.374542	0.850948	-0.850948
OVGP1	-0.0852563	-0.793471	1.6747	-1.17032	-0.0565444	0.43089	0.510967	-0.510967
OXER1	-0.446847	0.927272	0.76506	-1.60257	-0.422784	0.77987	-0.0348569	0.0348569
PACS1	0.756254	-1.98461	0.293529	0.45156	0.44482	0.038447	0.498201	-0.498201
PACSIN2	0.956277	-1.7471	0.430202	-0.0620929	0.825733	-0.403022	0.737404	-0.737404
PAN2	-1.04012	-1.02137	-0.302687	0.204208	1.53215	0.627813	0.0631167	-0.0631167
PARP2	-1.24176	0.866594	-1.03954	1.20319	-0.173851	0.385362	-0.818383	0.818383
PCDH1	-0.0964791	-0.469408	-0.488384	-0.615188	2.00943	-0.339967	0.474854	-0.474854
PCDH19	-0.513496	-0.719436	1.89676	-0.177049	0.242	-0.72878	0.541755	-0.541755
PCDHB10	-0.905191	-1.1945	1.23757	-0.47152	0.901953	0.431689	0.411445	-0.411445
PCDHB13	0.857363	0.119339	1.04433	0.397886	-1.40459	-1.01433	0.165701	-0.165701
PCDHB14	0.292895	-0.754554	1.6047	-0.822571	-0.88198	0.561512	0.338537	-0.338537
PCDHB16	0.293043	-1.56411	1.22987	0.439392	0.385179	-0.783379	0.636031	-0.636031
PCDHB2	1.01695	0.200005	-0.483797	-1.39112	1.2065	-0.548541	0.579885	-0.579885
PCDHB4	-0.866896	-0.312911	1.09227	1.33611	-0.18107	-1.0675	0.0147666	-0.0147666
PCDHB5	-0.973215	-1.00792	1.22128	1.15703	-0.451406	0.0542372	-0.0677813	0.0677813
PCDHB6	-1.35037	-0.681999	-0.0993398	-0.178808	1.14318	1.16734	-0.102178	0.102178
PCDHGA1	0.102259	-0.568425	1.6556	0.0418806	-1.37907	0.147756	0.126263	-0.126263
PCDHGA12	0.195039	-1.47062	0.902844	-0.507578	1.25838	-0.378066	0.785422	-0.785422
PCDHGA2	1.55067	-0.294947	0.694652	-0.533103	-0.101444	-1.31583	0.714626	-0.714626
PCDHGA4	1.26968	-0.829305	1.2012	-0.445011	-0.18393	-1.01263	0.762316	-0.762316
PCDHGA7	-0.789258	-1.29885	-0.121075	1.07952	1.22513	-0.0954648	0.104932	-0.104932
PCDHGB2	0.605003	-0.824449	1.69778	-0.123242	-0.414417	-0.940675	0.629455	-0.629455
PCDHGB4	-0.459345	-0.705042	1.62845	0.598606	0.067469	-1.13013	0.41219	-0.41219
PCDHGB6	-0.382052	-0.510394	1.93665	0.2071	-0.718204	-0.533104	0.278799	-0.278799
PCDHGB7	0.0258984	-1.18142	1.6945	-0.488515	0.470918	-0.521386	0.730439	-0.730439
PCDHGC3	0.964488	0.1083	1.30677	-0.509204	-0.521659	-1.34869	0.583199	-0.583199
PCDHGC5	1.11527	0.213395	-0.411801	-0.810747	1.14655	-1.25267	0.616673	-0.616673
PCGF3	-1.45591	0.375276	0.917355	0.412745	-1.04573	0.796265	-0.528096	0.528096
PCNT	0.474684	-1.26422	-0.813346	1.47349	0.474184	-0.344792	0.045174	-0.045174
PCP4L1	-1.06568	1.62427	0.193056	0.113099	-1.06568	0.20093	-0.646098	0.646098
PDE2A	-0.240332	-1.43995	-0.101734	-0.00600786	0.100319	1.6877	-0.0805824	0.0805824
PDE5A	-0.479579	-1.23975	0.636117	-0.91361	1.00375	0.993072	0.386762	-0.386762
PDE8A	-1.25271	0.699831	1.28999	-0.119626	0.423348	-1.04083	0.153543	-0.153543
PDE8B	-0.19172	-0.11081	0.00265101	0.718895	-1.68368	1.26466	-0.624249	0.624249
PDZD4	1.18089	-0.833559	-0.427241	-1.08387	1.24378	-0.0799931	0.665807	-0.665807
PDZK1IP1	-0.726543	-0.604482	0.197599	1.88991	-0.702127	-0.0543557	-0.410357	0.410357
PEAR1	-0.386523	-0.863919	-0.0663293	1.88603	-0.720922	0.151662	-0.391258	0.391258
PELP1	-0.80863	0.369691	-1.01569	1.65376	-0.559489	0.360359	-0.794604	0.794604
PER2	-0.844863	-0.00864141	-0.673672	-0.826957	0.742633	1.6115	-0.258634	0.258634
PF4	0.734188	-0.458905	-0.192415	-0.777275	1.64491	-0.950506	0.728895	-0.728895
PF4V1	0.40362	-0.16827	1.64491	-1.02105	0.158347	-1.01756	0.735626	-0.735626
PFAS	-0.666924	0.537267	-1.05145	1.68088	-0.574514	0.0747342	-0.764295	0.764295
PHF12	0.135976	-1.55293	0.313226	-0.318799	1.53539	-0.112865	0.661532	-0.661532
PHF2	0.864385	-1.36608	0.257605	-1.0413	1.0954	0.189983	0.739132	-0.739132
PHF8	0.767339	-1.64394	-0.341525	-0.333832	1.14766	0.404297	0.524491	-0.524491
PHKA2	-1.00451	-1.34486	0.409958	0.413657	1.34561	0.18015	0.250352	-0.250352
PHKG1	-0.495224	-0.898641	-0.624783	-0.111484	1.86372	0.266414	0.247903	-0.247903
PHLDB1	-0.123871	-1.5953	-0.376308	0.0628375	1.35419	0.678445	0.284671	-0.284671
PHLPP1	1.85167	-1.07842	-0.601502	0.0740118	-0.0492406	-0.196513	0.400309	-0.400309
PHOSPHO1	0.107187	-0.607734	1.95531	-0.607734	-0.607734	-0.239294	0.48492	-0.48492
PI4KB	0.124012	1.16493	-1.39442	0.722414	-1.00523	0.388293	-0.758547	0.758547
PIAS3	0.451788	-1.25947	0.981688	-1.2718	0.662593	0.435203	0.69869	-0.69869
PIGG	-0.738032	0.49726	-0.549136	1.18863	-1.29803	0.899309	-0.861734	0.861734
PIK3C2B	0.870567	-0.996976	1.44398	-0.1894	-0.0686939	-1.05948	0.748617	-0.748617
PIK3R1	0.860258	-0.846531	0.71617	1.04055	-0.449082	-1.32137	0.375782	-0.375782
PILRB	-0.684561	-0.666053	-0.6798	-0.547348	1.24645	1.33131	-0.0393023	0.0393023
PIP4K2B	1.28919	-1.47183	0.716599	-0.361067	0.419953	-0.592838	0.80858	-0.80858
PIP5K1A	-1.15278	-0.529327	0.566898	0.843012	-0.941353	1.21355	-0.50908	0.50908
PITPNM2	1.19735	-1.43584	-0.604195	-0.235185	1.04066	0.037206	0.544605	-0.544605
PITPNM3	0.916049	-0.837264	1.49198	-0.735435	-0.00288879	-0.832442	0.801714	-0.801714
PITRM1	1.41097	-0.851482	0.931197	-0.213629	-0.11131	-1.16575	0.74362	-0.74362
PKD1	0.288298	-1.26369	-0.732718	-0.338489	1.55914	0.48746	0.371572	-0.371572
PKD2	0.306825	-0.999004	0.378164	-1.32589	1.39537	0.244539	0.693452	-0.693452
PKP4	-0.557482	0.653485	-0.368833	1.62949	-1.20303	-0.153637	-0.709781	0.709781
PLA2G6	-1.31764	-0.177642	-0.745191	0.0241071	0.776336	1.44003	-0.428831	0.428831
PLAT	0.149677	-0.790377	0.311789	-0.82434	1.7831	-0.629848	0.748188	-0.748188
PLCB4	0.142481	-0.878615	1.80386	-0.356833	0.180186	-0.89108	0.708843	-0.708843
PLCD1	-0.75568	-0.469	-0.239867	1.97731	-0.491132	-0.0216355	-0.49556	0.49556
PLCD4	-0.334202	-1.18105	1.77407	0.320496	-0.0952327	-0.484081	0.448211	-0.448211
PLCG1	-0.841261	-1.21608	-0.117513	0.999454	1.33266	-0.157262	0.124629	-0.124629
PLEC	1.46376	-1.03359	-1.06958	0.339581	0.642273	-0.342445	0.345485	-0.345485
PLEKHA6	1.72361	-0.196909	-0.814135	-0.814135	0.625075	-0.523503	0.511516	-0.511516
PLEKHG3	-0.780784	0.428451	-0.594846	1.68965	-0.972247	0.22978	-0.782626	0.782626
PLEKHH2	-0.396853	-1.16865	1.39068	0.988975	-0.065535	-0.748611	0.309429	-0.309429
PLEKHH3	0.33551	-1.15231	-0.743711	-0.542884	0.551881	1.55152	0.0478934	-0.0478934
PLEKHM1	1.88643	-0.862504	-0.414391	-0.0241999	0.127949	-0.713288	0.53333	-0.53333
PLK2	1.27865	0.80121	-1.16822	0.529711	-0.86041	-0.580943	-0.249993	0.249993
PLN	-0.833887	-1.53038	1.07391	0.599982	0.0203896	0.669993	0.0868031	-0.0868031
PLS3	-0.500134	-0.130081	1.96094	-0.450831	-0.0543881	-0.825504	0.468806	-0.468806
PLSCR4	-0.93657	-0.420822	-0.428552	1.53953	-0.701891	0.948303	-0.689004	0.689004
PLXNB1	-1.17437	-0.519793	-0.454607	1.74688	0.124607	0.277278	-0.501456	0.501456
PMS2	0.34625	-1.62121	0.798031	0.355945	0.920991	-0.800007	0.688424	-0.688424
PNISR	-0.0627919	-1.0312	0.132955	-0.705692	1.84034	-0.173608	0.636835	-0.636835
PNN	-0.874096	-0.799328	0.395273	-0.341429	1.81296	-0.193379	0.444712	-0.444712
PNPLA7	-0.408788	-1.15279	1.68024	-0.318644	0.628782	-0.428803	0.633411	-0.633411
PODXL	-0.752025	-0.265243	0.0290544	1.96713	-0.404218	-0.574697	-0.375729	0.375729
POFUT2	-0.646805	1.49931	-0.703957	0.61128	-1.14667	0.386846	-0.832478	0.832478
POLR2A	0.89668	-1.67632	0.101715	-0.449136	1.08253	0.0445225	0.693643	-0.693643
POM121	1.21828	-1.27868	0.607464	-0.720446	0.785866	-0.612487	0.870537	-0.870537
POMT1	0.529774	-0.898688	1.74136	-0.488283	-0.0884787	-0.795684	0.727552	-0.727552
POU2F1	-0.0524846	-1.89392	0.883207	0.0838816	0.757691	0.221627	0.529471	-0.529471
POU6F1	0.906251	-0.500154	-0.777834	-1.21809	1.33158	0.258251	0.486664	-0.486664
PPFIBP1	0.104301	-1.31017	1.56362	-0.0108589	0.445988	-0.792875	0.704635	-0.704635
PPIP5K1	-1.07698	0.993428	-0.708286	1.37119	-0.679251	0.0998992	-0.821507	0.821507
PPM1L	-0.100258	-0.860013	1.68693	-0.363977	0.595299	-0.957982	0.727324	-0.727324
PPME1	0.379745	-0.398821	-0.922363	-1.15123	0.639518	1.45315	0.0322999	-0.0322999
PPOX	0.609524	-0.081662	-1.51832	-0.800579	1.08484	0.706195	0.0586818	-0.0586818
PPP1R12B	0.251735	-1.53017	1.33886	-0.48349	0.701118	-0.278051	0.763905	-0.763905
PPP1R13B	-0.756901	-0.732973	-1.1278	0.463476	0.873614	1.28059	-0.33703	0.33703
PPP1R3C	-1.04326	0.825932	-0.930622	-0.596683	0.379627	1.36501	-0.531418	0.531418
PRCD	1.25624	-0.988296	-0.337606	-0.835352	1.23475	-0.32974	0.717796	-0.717796
PRKDC	0.0300947	-1.01498	0.890016	1.39428	-0.208958	-1.09046	0.237051	-0.237051
PROSER1	-0.188116	-1.87891	0.107847	0.36768	0.898371	0.693127	0.272701	-0.272701
PROX1	-0.376389	-1.28856	0.903122	-0.673073	1.38821	0.0466894	0.638313	-0.638313
PRPF3	-0.54617	-0.625403	-1.07815	0.121962	0.404495	1.72327	-0.40661	0.40661
PRPF40B	-1.1289	0.477795	-1.30019	0.47556	0.242027	1.23371	-0.729023	0.729023
PRRC2B	0.936568	-1.48972	0.0783626	0.498109	0.896374	-0.919691	0.637101	-0.637101
PRRT1	-0.639862	-0.610564	1.90856	-0.503782	0.316185	-0.470539	0.528295	-0.528295
PRRT2	-0.557132	-1.138	0.193663	-0.47257	1.75686	0.217171	0.464465	-0.464465
PRSS53	-0.835517	-0.666455	-0.604236	-0.446129	1.41109	1.14125	-0.00955421	0.00955421
PRX	1.12039	-1.48556	0.257023	-0.361118	1.01926	-0.549997	0.79889	-0.79889
PTCH1	0.972758	-0.615663	0.649804	-1.30914	1.0151	-0.712859	0.879222	-0.879222
PTPN12	0.799496	-1.07601	1.15354	-0.884264	0.742003	-0.734766	0.898345	-0.898345
PTPN13	0.445785	-1.21717	1.36672	-0.870174	0.710508	-0.435672	0.841006	-0.841006
PTPRB	-0.424802	-0.740403	1.36952	1.18712	-0.791814	-0.599619	0.0509664	-0.0509664
PTPRF	0.443504	-1.55165	-0.524886	0.771599	1.19025	-0.328822	0.369623	-0.369623
PTPRG	1.47572	0.502633	0.271606	-0.0574197	-0.88538	-1.30716	0.287314	-0.287314
PTPRM	-0.634454	-1.34478	1.25979	-0.0876393	1.06255	-0.255463	0.562628	-0.562628
PTPRS	1.34838	-1.15803	-0.381794	-0.869652	0.964026	0.0970653	0.643539	-0.643539
PTPRU	-0.447861	-1.33394	0.433087	0.069874	1.64188	-0.363048	0.54237	-0.54237
PUS7	0.183013	-1.76285	1.01906	-0.410059	0.786231	0.184605	0.662768	-0.662768
PXN	-0.677866	0.679703	-1.15421	1.43458	-0.710514	0.428305	-0.84753	0.84753
PYGM	0.366768	-1.12561	-0.395992	-0.907062	1.52754	0.534351	0.49944	-0.49944
PYROXD2	0.11719	-1.51676	1.06043	-0.787912	0.954211	0.172844	0.710609	-0.710609
R3HDM2	-0.609472	-0.588991	-0.714909	-0.228531	0.227021	1.91488	-0.365787	0.365787
RAB11FIP3	1.50886	-0.0901022	0.209815	-0.751457	0.489294	-1.36641	0.735991	-0.735991
RAB5B	0.977956	-1.29134	-0.944003	0.193546	1.19584	-0.131997	0.40993	-0.40993
RABGAP1	0.525712	-1.43259	0.130644	-0.693111	1.47438	-0.00503306	0.710246	-0.710246
RABL2A	0.131729	-1.55773	-0.296559	0.255313	-0.0807962	1.54805	-0.0818755	0.0818755
RABL2B	-1.58774	0.651977	-0.339969	0.768767	-0.527189	1.03416	-0.818301	0.818301
RAD52	-1.25096	-1.27392	0.66634	0.997166	0.468718	0.392657	-0.0386348	0.0386348
RAD54L2	0.441514	-1.53916	-0.36606	0.548614	1.34703	-0.431941	0.474163	-0.474163
RAF1	0.775856	0.767827	0.868131	-1.49046	-0.912846	-0.00850533	0.243714	-0.243714
RAI1	0.892473	-0.769949	-0.826406	1.58787	-0.530518	-0.353471	-0.154817	0.154817
RANBP10	1.16595	-1.52878	0.00400144	-0.469719	1.02234	-0.193784	0.730763	-0.730763
RAP1GAP	-0.246682	-1.49924	0.40769	-0.644394	1.26018	0.722449	0.473728	-0.473728
RAP1GAP2	-1.17216	-0.721539	1.43488	0.68411	0.413259	-0.638551	0.225327	-0.225327
RAPGEF2	0.0762238	-1.66101	-0.159259	-0.0750128	1.43382	0.385236	0.450262	-0.450262
RAPGEF3	1.2065	1.05166	-1.38706	-0.560105	-0.431501	0.120508	-0.20402	0.20402
RAPGEFL1	0.374362	-0.97631	-0.791629	-0.785921	1.46871	0.710793	0.350479	-0.350479
RAPH1	0.591197	-0.971912	0.982199	-0.4776	1.05729	-1.18118	0.876897	-0.876897
RARG	0.360279	-1.89729	0.992693	0.144615	-0.103689	0.503388	0.416428	-0.416428
RASGRF2	-0.606096	0.746422	0.295458	0.438727	0.86914	-1.74365	0.186167	-0.186167
RASL12	-0.128297	-0.872309	-0.21557	-1.06777	0.679487	1.60446	0.111873	-0.111873
RBFOX2	-0.232662	-1.0272	1.62852	-0.310079	0.725953	-0.784537	0.707271	-0.707271
RBM24	-0.766868	0.615183	0.997082	-0.949268	-0.980728	1.0846	-0.250171	0.250171
RBM28	0.59605	-0.872311	0.8838	1.20364	-0.988523	-0.822657	0.163776	-0.163776
RBM44	1.26188	-0.755614	-0.59665	-0.457882	1.30388	-0.755614	0.65637	-0.65637
RBM5	-0.931169	-0.0275424	-0.548291	-0.876693	1.52498	0.858715	0.0151733	-0.0151733
RBPMS2	1.27406	-0.11825	0.904623	0.131953	-0.847421	-1.34496	0.443753	-0.443753
RCAN2	1.24797	-0.860568	1.24628	-0.675298	-0.137502	-0.820881	0.785582	-0.785582
RCOR3	-0.523945	-1.17855	0.802323	-0.931803	1.1866	0.645373	0.488326	-0.488326
RERE	0.42417	-1.49325	-0.417495	-0.342399	0.354938	1.47403	0.120538	-0.120538
REXO1	1.39594	-1.13142	-0.227571	-0.349052	1.03608	-0.723974	0.734817	-0.734817
RGL2	-0.284219	0.349577	-1.65932	-0.0585291	0.245344	1.40715	-0.566065	0.566065
RGL3	-0.770282	-0.636084	0.73543	-0.50421	1.70929	-0.534143	0.558146	-0.558146
RGPD3	-1.59673	0.433894	-0.691917	0.895481	0.990243	-0.0309662	-0.432803	0.432803
RGS5	-0.371926	-0.540188	0.0541293	1.02375	-1.40673	1.24096	-0.574842	0.574842
RHBDF1	0.0166678	1.00306	-1.77138	0.355526	-0.372442	0.768572	-0.709051	0.709051
RHOBTB1	0.0481985	-1.60361	1.55212	-0.0925603	0.00396278	0.0918963	0.53476	-0.53476
RIMKLB	-1.239	-0.58275	-0.639671	1.02779	0.154622	1.27901	-0.574681	0.574681
RNF180	-0.817769	-0.651779	1.64302	0.532511	0.227587	-0.933571	0.350946	-0.350946
RNF216	0.531692	-1.07422	-1.23808	0.723223	-0.159939	1.21732	-0.288777	0.288777
RNF38	-0.108395	-1.67635	0.835887	-0.569536	0.792945	0.725446	0.506812	-0.506812
RNPC3	-0.306309	-1.27742	0.657511	-0.186853	1.6024	-0.48933	0.651201	-0.651201
ROBO4	-1.00118	0.885546	-1.13074	0.321881	-0.37558	1.30008	-0.835834	0.835834
ROPN1L	1.97742	-0.323069	-0.487065	-0.831783	-0.172868	-0.162637	0.439163	-0.439163
RPRD2	0.722814	-1.2213	1.28185	-0.682551	0.609852	-0.710668	0.871505	-0.871505
RTEL1	-1.15721	0.644381	-0.373982	1.15898	0.792765	-1.06493	-0.246142	0.246142
RTEL1-TNFRSF6B	-0.141071	-1.00472	-0.628669	-0.0495278	1.8891	-0.0651161	0.373121	-0.373121
RUFY2	0.534846	-1.38041	1.00791	-0.985837	0.902446	-0.0789579	0.815068	-0.815068
RUSC2	0.650176	-1.08219	-0.263306	1.65616	-0.223211	-0.737629	0.0545529	-0.0545529
RXRB	-0.998371	1.16793	-1.08469	0.308679	-0.466014	1.07247	-0.849692	0.849692
S100A1	-0.752436	-0.353107	-0.992855	0.837781	-0.325447	1.58606	-0.690246	0.690246
SAFB	0.345306	-0.9165	-1.38352	1.32849	0.0252866	0.60094	-0.337644	0.337644
SAMD4A	0.8774	-1.30098	1.10168	-0.0349337	0.425367	-1.06853	0.801482	-0.801482
SASH1	-0.0574874	-1.42578	-0.229961	-0.473339	1.47824	0.708325	0.396931	-0.396931
SATB2	-0.225665	-0.28056	0.491661	1.76146	-0.878499	-0.868399	-0.204168	0.204168
SCAF1	0.470873	-0.0776276	-1.74823	0.973479	-0.398957	0.780461	-0.558771	0.558771
SCAP	0.250356	-0.0988238	-1.72606	0.830955	-0.32869	1.07226	-0.601465	0.601465
SCARA3	0.0269127	-1.76148	0.802687	0.40204	0.954178	-0.424337	0.594593	-0.594593
SCARF1	-0.881953	0.628481	-0.881873	1.40615	-0.854969	0.584169	-0.872932	0.872932
SCHIP1	-0.377071	0.129962	1.03346	-1.74908	0.127677	0.835045	0.261357	-0.261357
SCMH1	0.123458	-0.871139	-1.18966	-0.340266	1.3636	0.914008	0.0991323	-0.0991323
SCNN1D	0.573989	-0.471008	-0.632277	-1.02627	1.72271	-0.167148	0.554809	-0.554809
SCRIB	-0.470115	0.435592	-1.04853	1.6837	-0.787465	0.186816	-0.768702	0.768702
SEC16B	-0.83182	-0.83182	0.457972	1.5839	0.453583	-0.83182	0.0265785	-0.0265785
SEC31B	-0.292545	-1.1428	0.272791	-0.689618	1.74559	0.106591	0.575277	-0.575277
SEC61A2	0.321988	-0.418081	0.208421	-1.6795	0.222637	1.34454	0.251015	-0.251015
SEMA3B	0.771016	-1.08428	-0.0434235	-0.854153	1.54493	-0.334089	0.757506	-0.757506
SEMA3G	0.109579	1.66784	-0.787927	-0.787927	0.586362	-0.787927	-0.0306617	0.0306617
SEMA4C	-0.299557	1.41834	-1.54544	0.224464	-0.367616	0.569803	-0.737536	0.737536
SEMA6C	1.10158	-0.961942	-0.0443235	-1.33591	1.01084	0.229756	0.689364	-0.689364
SERPINA5	-0.712097	0.307851	-0.701241	-1.15877	1.12108	1.14317	-0.0974193	0.0974193
SETBP1	-1.01441	-0.814402	-0.0759999	-0.546037	1.21046	1.2404	0.0400144	-0.0400144
SETD1B	0.710171	-1.63486	-0.811259	0.803077	0.672236	0.260632	0.190382	-0.190382
SETD2	0.8301	-1.45989	0.68613	-0.445254	1.04151	-0.652592	0.85258	-0.85258
SETD5	-0.201715	-1.29986	-0.8676	0.133633	1.12973	1.10581	0.0201378	-0.0201378
SF1	-0.452492	-0.238999	-1.2266	1.34451	-0.507367	1.08095	-0.72882	0.72882
SF3A2	-0.657991	0.421334	-1.2917	1.25387	-0.608134	0.882622	-0.852608	0.852608
SFN	1.19665	-0.968793	1.24928	-0.276399	-0.23195	-0.968793	0.737995	-0.737995
SFPQ	0.958177	0.85509	-1.5612	0.536109	0.0029904	-0.791164	-0.200012	0.200012
SFSWAP	-0.841158	0.367987	-1.43557	1.16465	-0.109056	0.853152	-0.795263	0.795263
SGCG	1.24606	1.04272	-0.541184	-1.40472	-0.0388022	-0.304071	0.222025	-0.222025
SH2B1	0.910456	-1.01154	0.193978	-1.17314	1.29858	-0.218326	0.801003	-0.801003
SH3BGRL2	-0.52249	-0.332451	1.49226	0.940205	-1.15026	-0.427266	-0.0601627	0.0601627
SHANK3	0.313275	-1.72086	1.16726	0.520112	0.226411	-0.506202	0.568982	-0.568982
SIK2	1.26514	-1.38743	-0.121681	-0.749707	0.946227	0.0474497	0.696562	-0.696562
SIK3	0.890507	-1.47367	0.194506	-0.618223	1.24787	-0.240996	0.777629	-0.777629
SIN3A	-0.0908555	-1.72777	-0.388042	0.373266	1.05083	0.782574	0.190643	-0.190643
SIN3B	-0.338663	-1.61241	0.629245	-0.331503	1.281	0.372328	0.523862	-0.523862
SIPA1L1	0.452727	-1.14231	1.03763	-0.617927	1.13375	-0.863873	0.874702	-0.874702
SKI	0.743589	-1.65559	0.880962	0.0483706	0.672329	-0.689656	0.765626	-0.765626
SKOR1	-1.49918	1.21859	-0.227422	-0.308206	1.03568	-0.219467	-0.230307	0.230307
SLC12A4	-0.745864	1.00609	-0.842779	1.37977	-0.898428	0.101205	-0.829023	0.829023
SLC12A6	0.854286	-0.914577	1.20678	-0.421797	0.514272	-1.23897	0.858446	-0.858446
SLC14A1	1.92469	0.219353	-0.34347	-0.447981	-0.760151	-0.592436	0.273688	-0.273688
SLC16A2	-0.904827	0.938267	-0.238901	1.46389	-1.02232	-0.236114	-0.722016	0.722016
SLC22A1	-0.430795	1.22218	0.676931	0.706034	-1.09215	-1.0822	-0.282005	0.282005
SLC22A17	-1.61165	0.343607	0.42665	1.30729	-0.610417	0.144522	-0.598472	0.598472
SLC23A2	0.124872	-0.564629	1.90432	-0.16922	-0.354766	-0.940576	0.558141	-0.558141
SLC25A27	-0.0634922	-0.66099	1.77779	-0.712389	0.474883	-0.815798	0.729726	-0.729726
SLC25A29	0.396133	1.06898	-1.01079	-0.787574	1.16735	-0.834092	0.18423	-0.18423
SLC25A37	-1.06605	0.738555	-0.964705	-0.606855	1.2781	0.620955	-0.250885	0.250885
SLC29A1	-0.677379	-0.889313	1.77542	-0.257004	0.539384	-0.491106	0.545808	-0.545808
SLC2A4	0.400302	-0.805338	1.66455	0.351161	-0.805338	-0.805338	0.419839	-0.419839
SLC44A2	0.717991	-1.42763	0.515673	-0.890033	1.17476	-0.0907624	0.802807	-0.802807
SLC5A4	-0.116476	-0.726985	-0.726985	-0.726985	1.76589	0.531534	0.307478	-0.307478
SLC6A6	-0.0395249	1.32496	-1.003	0.801891	-1.25139	0.167057	-0.764637	0.764637
SLC6A8	0.803615	-1.13617	0.271945	-1.11586	1.31356	-0.137098	0.796374	-0.796374
SLC9A8	-0.676913	-0.113941	-0.588136	1.57466	-1.0155	0.819826	-0.760182	0.760182
SLIT3	0.173937	-1.63464	0.509715	1.38086	-0.0757459	-0.354126	0.202635	-0.202635
SLX4	0.259917	-0.0797388	-1.95643	0.718301	0.635967	0.421981	-0.353514	0.353514
SMAD3	0.622892	-1.54872	-0.369114	-0.571057	1.00426	0.86174	0.419345	-0.419345
SMAD6	1.33869	-0.22083	-0.455871	-1.58654	0.403922	0.520633	0.428913	-0.428913
SMARCC2	1.30237	-1.41717	0.0387599	-0.503521	0.95027	-0.370703	0.763798	-0.763798
SMARCD1	0.577068	-1.12133	0.800031	-0.857638	1.26346	-0.661592	0.880185	-0.880185
SMG6	0.962793	-1.23454	-0.452228	-0.811884	1.27085	0.265012	0.593803	-0.593803
SMTN	-0.0747661	-0.260245	-0.757345	-0.848911	1.90557	0.0357009	0.357819	-0.357819
SMURF1	1.19467	-1.01133	0.444865	-0.403844	0.927962	-1.15233	0.855834	-0.855834
SNAPC4	-1.0246	-0.618547	-1.03122	0.658021	0.869636	1.1467	-0.395393	0.395393
SNRNP70	-1.01452	0.38887	-1.3239	-0.051151	0.823113	1.17758	-0.5051	0.5051
SOBP	1.23996	-0.436617	-0.737163	-1.31755	0.94938	0.301988	0.484059	-0.484059
SOD3	0.576579	1.78317	-0.795231	-0.609187	-0.596078	-0.35925	-0.271577	0.271577
SORBS1	0.83844	-0.760244	0.227048	-1.05927	1.4403	-0.686277	0.835263	-0.835263
SORBS2	0.932235	-1.18327	0.919674	-0.717638	0.851786	-0.80279	0.901232	-0.901232
SORBS3	0.804903	-0.951233	-0.906276	-0.806766	0.578652	1.28072	0.159093	-0.159093
SORT1	0.929067	-0.701624	1.55757	-0.400621	-0.468848	-0.915543	0.672596	-0.672596
SOX13	1.91826	-0.502952	-0.529855	-0.150546	0.129471	-0.864377	0.505958	-0.505958
SOX7	1.3907	-1.05798	1.0919	-0.386872	-0.700884	-0.336868	0.593906	-0.593906
SOX8	1.52529	-0.637337	1.02406	-0.637337	-0.637337	-0.637337	0.637337	-0.637337
SOX9	-0.669401	-1.06278	0.403532	1.37604	0.802422	-0.849819	0.178851	-0.178851
SP2	1.23806	-1.24775	0.679761	-0.924358	-0.402711	0.656992	0.505038	-0.505038
SPAG17	-0.764573	-0.731671	-0.756109	0.557367	1.73102	-0.0360332	0.0701124	-0.0701124
SPAG8	1.50921	-0.190991	0.262913	-1.31502	0.519636	-0.78575	0.763919	-0.763919
SPAG9	0.396794	-1.65403	0.610165	0.78484	0.675755	-0.813522	0.560904	-0.560904
SPEG	-0.178985	-0.420226	-1.52937	0.0961911	0.581545	1.45085	-0.375604	0.375604
SPEN	1.4154	-0.997814	-0.521517	-0.262216	1.0756	-0.709462	0.656497	-0.656497
SPG7	0.287452	-0.0469617	-1.69979	0.60797	-0.378661	1.22999	-0.596999	0.596999
SPPL2B	-0.985667	-0.209536	-1.1816	0.458081	0.440813	1.47791	-0.575485	0.575485
SPRED2	1.69778	-0.839997	-0.096518	-0.580606	0.633967	-0.814626	0.745076	-0.745076
SPTAN1	0.561643	-1.41293	-0.315745	-0.452777	1.54188	0.0779252	0.595928	-0.595928
SPTBN1	0.462267	-1.43477	1.26667	0.410438	0.242088	-0.946697	0.657008	-0.657008
SRGAP2	1.06309	-1.40453	0.70414	-0.562248	0.829601	-0.630057	0.86561	-0.86561
SRPK3	-0.883033	-0.840887	0.193923	-0.687273	1.63068	0.586586	0.313858	-0.313858
SRRT	1.42505	-1.11746	-1.09368	0.377998	0.590209	-0.182119	0.307194	-0.307194
SRSF4	0.147283	-0.745645	-1.47663	0.181043	0.491142	1.40281	-0.279403	0.279403
SS18L1	-0.569216	-0.146665	1.23445	-1.11251	1.2234	-0.629464	0.629546	-0.629546
SSC5D	-1.01651	-1.45743	0.189457	0.916354	0.808762	0.559372	-0.0060971	0.0060971
SSH3	-0.869437	0.072177	-1.47811	0.863564	0.311107	1.1007	-0.678813	0.678813
SSTR1	1.53824	0.177504	-0.312763	-0.386094	0.450309	-1.46719	0.558594	-0.558594
STARD9	0.771985	-1.31416	0.460713	-0.668958	1.30679	-0.556373	0.846497	-0.846497
STAT5B	0.916562	-1.11526	0.614187	-0.899077	1.14002	-0.656432	0.890256	-0.890256
STIM1	1.71537	-1.4218	0.00147458	-0.140741	-0.123401	-0.0308978	0.531147	-0.531147
STK35	0.000516878	-1.41029	0.280821	-0.822822	1.3945	0.55728	0.558611	-0.558611
STON1	-0.392345	-0.939735	1.5481	-0.394767	0.924405	-0.745652	0.693385	-0.693385
STOX2	-0.337149	-0.185454	1.83978	-0.40259	-1.12319	0.208609	0.126478	-0.126478
STRADA	-1.09131	0.104134	-0.127979	1.86981	-0.356292	-0.398368	-0.525192	0.525192
STRIP1	0.0989563	0.714043	-1.93964	0.190726	0.817112	0.118798	-0.341189	0.341189
STS	0.792763	0.643838	0.985487	-0.0290706	-0.949824	-1.44319	0.276142	-0.276142
STX3	-0.636264	1.54967	-0.80931	0.826248	-0.925206	-0.00513577	-0.79026	0.79026
STXBP1	0.377701	-1.71196	0.313983	-0.653519	0.841838	0.831961	0.511174	-0.511174
SULF1	-0.0258922	-1.36776	0.551765	-0.774772	1.48548	0.131177	0.670451	-0.670451
SUN1	0.672939	-1.08486	0.9622	-0.476301	1.01534	-1.08932	0.883494	-0.883494
SUN2	-0.521664	0.533293	-1.40679	1.18845	-0.614496	0.821204	-0.84765	0.84765
SUPT6H	1.39018	-1.37287	0.186087	-0.374978	0.790301	-0.618714	0.788856	-0.788856
SUSD2	1.49914	1.01554	-0.676215	-0.892266	-0.573616	-0.372582	0.0831027	-0.0831027
SV2A	0.531361	-0.733094	0.383104	-1.52784	1.30278	0.0436911	0.739082	-0.739082
SVEP1	0.825701	-1.04176	1.35809	-0.0417049	0.074908	-1.17524	0.752901	-0.752901
SVIL	1.17544	-1.20527	0.990696	-0.0738626	0.183139	-1.07014	0.783091	-0.783091
SYN2	1.74492	-0.594558	-0.968932	-0.426747	-0.352069	0.597391	0.141305	-0.141305
SYNE1	0.19183	-1.54625	0.716112	0.182284	1.20839	-0.752367	0.705445	-0.705445
SYNE2	0.352221	-1.8572	-0.278863	0.50239	0.26957	1.01188	0.114309	-0.114309
SYNE3	1.85918	-0.644627	-0.726597	-0.749243	0.177791	0.083492	0.436793	-0.436793
SYNGAP1	-0.0301923	-0.878842	-1.25457	-0.117491	1.00399	1.2771	-0.0935895	0.0935895
SYNM	1.76379	-0.54155	0.648856	-0.554693	-0.675535	-0.640871	0.579038	-0.579038
SYNPO	-0.976007	-1.52814	0.68613	0.336265	0.617282	0.864471	0.109135	-0.109135
SYNPO2	-0.300376	-0.909357	0.270995	-0.808995	1.82981	-0.082075	0.600142	-0.600142
SZT2	0.0984205	-1.5599	-0.348501	-0.122549	1.4922	0.440329	0.41404	-0.41404
TAF1	0.0402658	-1.85509	-0.0922899	0.350153	1.10546	0.451502	0.351145	-0.351145
TAF15	-0.891638	-0.800007	-0.444908	1.28167	-0.396858	1.25174	-0.577801	0.577801
TAF1C	-1.33963	0.130245	-0.848302	0.918625	-0.129111	1.26817	-0.772348	0.772348
TAF4	0.301116	-0.357684	-1.35375	1.53072	-0.60719	0.486797	-0.553276	0.553276
TANC1	-0.0751593	-1.25594	1.43894	0.864429	-0.234609	-0.737663	0.37639	-0.37639
TANC2	0.1468	-1.078	1.63912	0.463199	-0.246914	-0.924196	0.513	-0.513
TAOK2	0.880004	1.02529	-1.16995	0.691176	-1.10721	-0.31932	-0.465716	0.465716
TBC1D17	0.127539	-0.410213	-1.47612	-0.276133	0.522574	1.51235	-0.275335	0.275335
TBC1D8	1.31527	0.375732	0.829339	-1.2206	-0.419071	-0.880674	0.575181	-0.575181
TBL1X	0.532682	-1.3973	0.288845	-0.719265	1.46129	-0.16625	0.76094	-0.76094
TBX2	0.0266852	1.52602	-0.459501	0.804105	-1.02909	-0.868212	-0.487304	0.487304
TBX3	0.0368963	-1.01609	-0.285182	-0.948774	1.62411	0.589037	0.458608	-0.458608
TBX5	0.825736	-0.46772	0.510329	1.1393	-1.51648	-0.491168	-0.0601379	0.0601379
TCERG1	-0.238981	-1.79619	0.00746081	0.422471	1.15594	0.449291	0.308141	-0.308141
TCF7L2	0.175748	-1.71448	0.634164	-0.497671	1.14649	0.255743	0.652135	-0.652135
TCHP	-0.447773	-0.0895061	-0.983131	1.93374	-0.21606	-0.197269	-0.548988	0.548988
TCP11L2	0.214955	-1.14109	0.693354	-0.842713	1.50792	-0.432425	0.805409	-0.805409
TCTN2	1.52373	-0.609934	-0.82536	-0.233648	-0.810535	0.955751	-0.0373895	0.0373895
TEAD1	-0.0913185	-1.39997	1.43391	-0.177617	0.79444	-0.559442	0.712343	-0.712343
TECPR2	1.7279	-1.28213	-0.0373484	0.0466772	0.135327	-0.590433	0.608627	-0.608627
TECTA	0.902854	-0.954888	-0.67963	-0.866187	1.42515	0.172704	0.549457	-0.549457
TEK	-1.09157	-0.809195	0.585942	1.14244	0.949423	-0.777041	0.147933	-0.147933
TEN1-CDK3	-1.13468	0.0533267	-0.231197	-0.724686	1.74521	0.292026	0.126444	-0.126444
TGFBR3	0.582014	-0.684328	-0.944129	-0.982696	1.38685	0.642292	0.341577	-0.341577
THBS1	-1.16672	-0.256906	-0.15705	1.87168	-0.10958	-0.181421	-0.477783	0.477783
THRA	1.12092	-1.3522	1.12797	-0.796773	-0.0882914	-0.0116295	0.7202	-0.7202
THRB	1.72159	-0.708137	0.350758	-0.216235	0.0201379	-1.16811	0.697494	-0.697494
THSD1	-0.337574	-0.13136	-1.20377	0.699661	-0.621815	1.59485	-0.721051	0.721051
TIMP2	0.455961	-1.21512	0.684126	-1.10654	1.27088	-0.0893059	0.803656	-0.803656
TINAGL1	-0.820394	-0.304914	0.540319	1.77458	-0.801349	-0.388245	-0.360475	0.360475
TJP1	0.496	-1.53212	1.20415	-0.175861	0.684237	-0.676405	0.794795	-0.794795
TJP2	1.7566	0.141592	-0.177523	-0.296427	-0.0953962	-1.32884	0.49456	-0.49456
TLN1	1.04324	-0.989505	0.653755	-0.863504	1.01271	-0.856692	0.903234	-0.903234
TMEM131	0.717464	-1.77943	0.432148	-0.48111	0.932019	0.178905	0.693877	-0.693877
TMEM164	1.33272	0.552442	-0.631147	-1.48202	-0.271974	0.499977	0.143199	-0.143199
TMEM178A	-0.272161	-0.725798	1.53344	-0.834116	0.957818	-0.659188	0.739701	-0.739701
TMEM201	-0.866341	0.498378	-1.0081	1.43901	-0.706778	0.643831	-0.860407	0.860407
TMEM43	-0.829543	-0.694344	-0.607497	-0.047414	0.3529	1.8259	-0.36138	0.36138
TMEM47	-0.664297	1.61306	0.313354	-1.35622	0.133127	-0.0390225	-0.0726052	0.0726052
TMEM63A	-0.692658	0.0991153	-1.03366	1.4582	-0.722131	0.891138	-0.816151	0.816151
TMEM86B	-0.947227	0.124701	-1.11001	-0.292123	0.728142	1.49652	-0.443031	0.443031
TMPRSS5	-0.335808	-0.636093	-1.06731	-0.381082	1.57712	0.843175	0.0579999	-0.0579999
TNFRSF10C	0.0292677	-1.27648	1.08064	0.396297	0.889757	-1.11949	0.666555	-0.666555
TNFRSF11B	0.0660083	-1.0426	1.22856	0.587254	0.502959	-1.34218	0.599175	-0.599175
TNK2	-0.306423	-1.51518	0.422133	1.5265	-0.280165	0.15313	-0.0548184	0.0548184
TNKS1BP1	-0.141471	-1.06949	-1.0571	0.134611	0.605852	1.5276	-0.197572	0.197572
TNPO2	0.86483	-1.16351	1.23374	-0.0606942	0.266476	-1.14084	0.788348	-0.788348
TNRC6C	1.02122	-1.21038	0.334027	0.095318	0.962167	-1.20236	0.772472	-0.772472
TNS1	0.852462	-1.54745	-0.095887	-0.52084	1.26328	0.0484355	0.673286	-0.673286
TOM1L2	1.67678	-0.860485	0.113694	-0.783279	0.563345	-0.710053	0.784605	-0.784605
TPR	0.459693	-1.68126	0.576755	0.301287	1.03188	-0.688353	0.689443	-0.689443
TPRG1	0.474811	-1.43785	1.55607	-0.387344	0.136525	-0.342209	0.722468	-0.722468
TRABD2B	-1.21764	-1.08087	0.717548	-0.163024	1.25074	0.493241	0.250217	-0.250217
TRAF3IP1	1.05449	-0.944355	0.531535	1.06617	-0.610332	-1.0975	0.32523	-0.32523
TRAF5	-1.10119	-1.44836	0.820507	0.661163	0.466662	0.601225	0.0619918	-0.0619918
TRIM25	1.76197	-0.962216	-0.253233	-0.704234	0.524448	-0.366733	0.677728	-0.677728
TRIM3	1.76253	0.495045	-0.922548	-0.791113	-0.163481	-0.380435	0.225501	-0.225501
TRIM45	-1.00892	1.68639	-0.74002	0.616273	-0.44635	-0.10737	-0.731763	0.731763
TRIM66	-1.10913	-1.1284	0.0921407	0.165046	1.49014	0.490207	0.157715	-0.157715
TRIP10	1.32142	-0.992477	-0.931374	0.793458	0.518303	-0.709334	0.302785	-0.302785
TSC1	0.102762	-0.941419	0.573355	1.35992	0.266924	-1.36154	0.314347	-0.314347
TSC2	-0.34289	-1.15938	-1.05365	0.450161	0.988428	1.11734	-0.136039	0.136039
TSPAN18	-0.909129	-0.710805	0.931854	-0.63839	1.53289	-0.206416	0.518537	-0.518537
TSPAN7	1.07471	-1.47733	0.0416109	1.15867	-0.40631	-0.391347	0.236669	-0.236669
TSPAN9	-0.789578	-0.828329	1.74615	-0.191842	0.580693	-0.517094	0.512422	-0.512422
TSPYL2	0.267532	-0.046585	-1.15972	-0.996935	1.56533	0.37038	0.22438	-0.22438
TSPYL4	-1.11018	-1.34322	0.913505	0.90992	0.541257	0.088712	0.114862	-0.114862
TTC17	-1.7053	0.402977	0.733649	-0.426185	1.09527	-0.100411	0.0412065	-0.0412065
TTC21A	-0.894939	-1.47389	0.0945024	0.359214	1.12329	0.791829	0.107616	-0.107616
TTC21B	-1.65651	-0.209007	0.771574	1.25485	0.0407126	-0.201614	-0.281409	0.281409
TTLL3	-0.462228	-1.27846	-0.227991	-0.418183	1.38898	0.997879	0.232921	-0.232921
TTLL4	-0.629787	0.711566	-1.01832	1.2876	-0.994223	0.643167	-0.880778	0.880778
TUB	-1.04371	0.00605113	0.694817	1.61065	-0.511436	-0.756376	-0.286775	0.286775
TUBA8	0.0922388	-1.12934	-1.12934	0.0424478	1.36468	0.759304	0.109195	-0.109195
TUBB1	-0.04163	0.778559	-1.69919	0.936212	0.573393	-0.547339	-0.389144	0.389144
TUBG2	-0.957992	-0.660691	-0.773389	-0.0701236	1.30689	1.15531	-0.141497	0.141497
TUBGCP3	-0.642432	1.05656	-0.709653	1.29708	-1.12663	0.125065	-0.826237	0.826237
TUBGCP5	0.401927	0.435222	-1.59363	0.119642	-0.654277	1.29112	-0.615327	0.615327
TUBGCP6	-0.28265	-0.860547	-0.988212	-0.260664	1.56621	0.825865	0.0984486	-0.0984486
TUG1	-0.182616	-1.45436	0.936981	-0.319083	1.33188	-0.312799	0.695414	-0.695414
TULP3	0.138294	-1.31901	0.514357	-1.14877	0.976618	0.838504	0.54309	-0.54309
TUT1	-1.05658	0.569284	-0.501898	1.2535	-1.05451	0.7902	-0.870994	0.870994
UACA	0.523367	-1.20329	1.51263	-0.420807	0.397457	-0.809364	0.811153	-0.811153
UBA1	0.270671	-1.20026	-0.743479	1.67634	-0.249845	0.246575	-0.240885	0.240885
UBAP1L	-0.457961	-0.013752	-0.605543	-0.86303	1.91783	0.0224543	0.284776	-0.284776
UBAP2L	1.34862	-1.71029	0.386861	-0.192499	-0.0828193	0.250117	0.550889	-0.550889
UCKL1	-0.0651033	0.783695	-1.93944	0.581097	0.122589	0.517163	-0.627318	0.627318
ULK1	-0.602346	-0.878327	0.422884	-0.65095	1.80391	-0.0951718	0.541483	-0.541483
UNC13B	0.431087	-0.0772866	-0.0125686	1.63403	-1.29351	-0.681751	-0.291665	0.291665
UNC5CL	-0.948595	-0.117589	-0.931606	1.70469	-0.22056	0.513665	-0.700254	0.700254
URB1	-0.621655	-0.67981	0.270493	1.91181	-0.57327	-0.307564	-0.308144	0.308144
URGCP	1.98361	-0.447986	-0.0495125	-0.256501	-0.472697	-0.756913	0.487133	-0.487133
USP11	0.417151	-1.53377	-0.0807746	-0.690721	1.26609	0.622027	0.534156	-0.534156
USP13	-0.290021	1.14159	-0.456555	1.21126	-1.37191	-0.234363	-0.706163	0.706163
USP19	-0.614652	-0.392361	-1.50588	0.889971	0.597479	1.02545	-0.507686	0.507686
USP24	1.21541	-1.53471	0.941614	-0.335309	0.108683	-0.395691	0.755236	-0.755236
USP28	0.764443	-1.39194	1.39693	0.132883	-0.225361	-0.676957	0.645338	-0.645338
USP34	0.294978	-1.07291	1.42156	-0.826239	0.812996	-0.630386	0.843178	-0.843178
USP40	-1.09546	1.40234	-0.870702	0.107184	-0.464334	0.920968	-0.810165	0.810165
USP54	-0.739989	0.140351	-0.496965	1.81522	-0.92167	0.203047	-0.719541	0.719541
UVSSA	0.832241	-1.49316	-0.632317	-0.108534	1.28559	0.116178	0.495172	-0.495172
VAMP2	0.951611	-1.28103	0.524235	-1.23897	0.743876	0.300282	0.739907	-0.739907
VANGL1	-0.857575	-1.15352	-0.0866014	1.62192	-0.0643069	0.540091	-0.336161	0.336161
VASN	1.45647	-1.14756	-0.58355	-0.795757	0.622256	0.448145	0.498392	-0.498392
VCL	0.459878	-1.22307	0.793217	1.32234	-0.690329	-0.66203	0.187589	-0.187589
VLDLR	0.478691	-1.36399	-1.15995	0.357884	0.924904	0.762467	0.0812138	-0.0812138
VNN3	0.279072	-0.879907	0.194966	-0.791467	1.77482	-0.577479	0.749618	-0.749618
VPS13A	-0.505107	-1.08536	1.40704	-0.146745	1.0343	-0.704132	0.645411	-0.645411
VPS13B	0.081216	-1.19348	1.53774	-0.445458	0.719119	-0.699141	0.779359	-0.779359
VPS13D	1.19535	-1.40644	0.691689	-0.269707	0.60857	-0.819465	0.831871	-0.831871
VPS39	1.38073	-0.903463	-0.220849	-1.01771	1.0526	-0.291312	0.737495	-0.737495
VWF	1.71237	-0.432533	0.271821	0.175756	-0.486913	-1.2405	0.499093	-0.499093
WASF3	-0.757227	0.01851	-0.00113977	1.59263	-1.29994	0.447163	-0.686101	0.686101
WDFY3	0.996321	-1.15943	0.82795	-0.394616	0.809698	-1.07993	0.87799	-0.87799
WDR19	1.01862	-0.876861	1.02177	-0.754391	0.660505	-1.06964	0.900299	-0.900299
WDR27	-0.328876	-0.0267584	-0.728835	-0.82133	1.91967	-0.0138741	0.287321	-0.287321
WDR90	-0.893673	-0.0721002	-1.27797	-0.0199107	1.14743	1.11623	-0.341405	0.341405
WFS1	1.87728	-0.902943	0.0244357	0.1213	-0.65475	-0.465318	0.415654	-0.415654
WIZ	1.51744	-1.2182	-0.0729329	-0.455675	0.81258	-0.583213	0.752361	-0.752361
WNK1	1.03628	-1.38509	0.773672	0.577601	0.0340167	-1.03648	0.614657	-0.614657
WWC3	-0.335033	-1.73445	0.201287	1.16299	0.697372	0.00783276	0.187875	-0.187875
WWP2	-0.61791	0.16609	-1.35797	1.08435	-0.445843	1.17129	-0.807243	0.807243
XPC	-0.0177931	-0.52075	0.753241	1.43374	-0.213139	-1.4353	0.174103	-0.174103
XPO5	-0.794568	-0.279739	-0.501082	1.97509	-0.370849	-0.0288475	-0.5555	0.5555
XPO6	1.50465	-1.57181	-0.0596011	-0.36483	0.308868	0.182722	0.584639	-0.584639
XRCC3	-0.918764	0.962419	-1.26454	1.25771	0.136564	-0.173394	-0.682247	0.682247
XYLT1	-0.618642	-1.09733	1.16221	-0.549053	1.31064	-0.207828	0.618069	-0.618069
YAP1	0.744416	-1.08514	1.28729	-0.901539	0.608915	-0.65395	0.880208	-0.880208
YLPM1	0.988098	-1.46844	0.667979	-0.363746	0.885966	-0.709852	0.847348	-0.847348
ZBED3	1.08955	-1.33147	1.0135	-0.441857	0.452911	-0.782637	0.851987	-0.851987
ZBTB40	0.616268	-1.23885	-0.976061	1.3874	0.410242	-0.198996	0.0168164	-0.0168164
ZC3H3	1.43592	-1.26895	-0.420591	-0.376986	0.951728	-0.321119	0.655684	-0.655684
ZC3H7B	-0.586974	0.529047	-0.702476	1.70293	-0.989887	0.0473571	-0.759779	0.759779
ZCCHC14	0.138728	-1.30524	1.5601	-0.128366	0.496485	-0.761707	0.731772	-0.731772
ZDHHC11	0.278081	-0.540923	-1.45591	-0.42939	0.97716	1.17098	-0.0668886	0.0668886
ZDHHC17	0.358945	-1.74677	0.726458	-0.589855	0.909774	0.341449	0.665059	-0.665059
ZDHHC8	-0.472842	-0.978649	-0.891304	0.540424	0.156902	1.64547	-0.402415	0.402415
ZEB1	-1.15148	-1.332	0.238498	0.902449	0.418867	0.923659	-0.164704	0.164704
ZER1	1.40905	-1.02129	-0.150131	-1.09501	0.865959	-0.00858276	0.708293	-0.708293
ZFC3H1	0.182495	-1.17033	1.11612	-0.397183	1.17305	-0.904152	0.823889	-0.823889
ZFP2	-1.07393	-0.342328	-0.123235	1.89331	-0.360057	0.00624381	-0.519074	0.519074
ZFP92	-0.78686	-1.08007	0.121286	0.607496	1.61379	-0.475636	0.316071	-0.316071
ZFX	-0.153497	-0.910112	-0.670692	-0.749583	1.08133	1.40255	0.0857143	-0.0857143
ZFYVE27	0.564197	0.74166	-1.36734	-1.06783	1.05662	0.0726978	0.084492	-0.084492
ZKSCAN8	-0.143977	-1.15176	0.797707	-0.717113	1.54668	-0.331537	0.73347	-0.73347
ZMIZ2	0.587582	-1.76044	-0.054034	-0.313073	0.403277	1.13668	0.312275	-0.312275
ZNF117	-1.47371	-0.863252	-0.0487539	0.718886	1.12893	0.537899	-0.131178	0.131178
ZNF142	1.16251	-1.49825	0.353124	-0.0823928	0.829442	-0.76443	0.781692	-0.781692
ZNF160	-0.969827	-0.176949	-0.856877	-0.438751	1.46484	0.977569	-0.120623	0.120623
ZNF182	-0.590719	-0.749736	1.55729	-0.388348	0.951286	-0.779771	0.639285	-0.639285
ZNF213	-0.658562	-0.9442	-0.480346	0.514564	-0.202923	1.77147	-0.447277	0.447277
ZNF251	0.104239	-1.23447	0.293256	-1.02	1.48285	0.374121	0.626783	-0.626783
ZNF300	-1.76709	0.904688	-0.418923	0.487097	-0.00956654	0.803793	-0.731859	0.731859
ZNF316	-0.497255	0.937588	-1.5549	1.19636	0.0623658	-0.144151	-0.663265	0.663265
ZNF335	-0.79767	0.45836	-1.41693	0.96643	-0.275936	1.06575	-0.830178	0.830178
ZNF337	0.204488	-0.07944	-1.61944	-0.330122	0.385052	1.43946	-0.3433	0.3433
ZNF462	0.294278	-0.375958	-1.51462	1.36242	-0.428238	0.662115	-0.549527	0.549527
ZNF503	-0.301912	1.15871	-1.4116	0.875337	-0.775093	0.454558	-0.829536	0.829536
ZNF512	-1.1288	-0.825691	0.00136551	-0.182815	0.464018	1.67192	-0.221138	0.221138
ZNF512B	-0.445819	-1.7021	0.421616	0.458473	1.23076	0.0370775	0.402184	-0.402184
ZNF516	-0.715677	-0.634498	-0.60923	1.91389	0.180934	-0.135419	-0.381325	0.381325
ZNF532	0.501301	-1.71262	0.822985	-0.284929	0.981028	-0.307764	0.768438	-0.768438
ZNF608	-1.33909	-0.364366	-0.00298514	1.18369	-0.615076	1.13782	-0.652382	0.652382
ZNF618	0.1286	-1.99391	0.310085	0.255645	0.61973	0.679853	0.352805	-0.352805
ZNF621	-1.07398	-0.891904	1.02996	0.156918	1.30116	-0.522149	0.419045	-0.419045
ZNF662	-0.725402	-0.636428	0.114828	-0.878655	1.77848	0.347174	0.389303	-0.389303
ZNF667	0.580813	-0.320635	0.106227	-1.56058	1.43378	-0.239606	0.706941	-0.706941
ZNF704	-0.328507	-0.726213	1.74271	-0.177543	0.508281	-1.01872	0.640827	-0.640827
ZNF736	-0.657526	0.769366	-0.353903	1.62746	-1.0407	-0.344692	-0.684044	0.684044
ZNF76	-0.0700252	1.86531	-1.17828	-0.222359	-0.201668	-0.192984	-0.483324	0.483324
ZNF783	-1.42584	0.777994	-0.612999	0.120173	-0.242363	1.38303	-0.760399	0.760399
ZNF785	-1.22318	-0.959303	0.307861	0.208466	1.56016	0.105994	0.214948	-0.214948
ZNF789	-1.46942	0.534083	-0.40107	0.313802	1.45294	-0.430341	-0.139182	0.139182
ZNF800	0.34938	-1.81658	1.10128	-0.33957	0.374871	0.330617	0.608511	-0.608511
ZNF83	-1.07747	-0.606405	0.169816	-0.421758	1.80185	0.133973	0.298064	-0.298064
ZNF865	-0.0761489	0.30958	-0.966826	1.62096	-1.13016	0.242598	-0.724378	0.724378
ZSWIM5	0.895225	-1.05017	-0.331889	-1.07603	1.33209	0.23077	0.63181	-0.63181
ZXDC	-0.821611	-0.871265	-0.948979	1.29958	0.4768	0.865474	-0.431263	0.431263

## Sheet: DKK3+ Zscore
	siCtrl_1	siTEAD4_1	siCtrl_2	siTEAD4_2	siCtrl_3	siTEAD4_3	mean_siCtrl	mean_siTEAD4
ABHD2	0.327161	-0.678849	1.67769	-0.0272811	-0.0275062	-1.27121	0.659115	-0.659115
AHNAK	0.720544	-1.16799	1.08232	0.820087	-0.400222	-1.05474	0.467548	-0.467548
ANGPTL1	-0.465685	-1.05162	0.283977	-0.782645	1.69791	0.318056	0.505402	-0.505402
ASPN	-0.613308	-0.700849	1.72021	0.72669	-0.522122	-0.610619	0.194926	-0.194926
CADM1	1.62251	0.0377274	0.0597046	0.384078	-1.02468	-1.07934	0.219179	-0.219179
CAMK1D	1.64566	-1.00536	-0.43657	-0.723932	0.724357	-0.204152	0.644483	-0.644483
CD109	-0.242388	-1.07027	1.76727	-0.149764	0.396946	-0.701797	0.640611	-0.640611
COL5A1	-0.410426	-1.49035	0.135813	0.140878	1.60365	0.0204366	0.443012	-0.443012
COL8A2	-1.10421	-0.805398	0.081221	1.66224	-0.334435	0.500575	-0.452473	0.452473
COMP	-0.249994	-0.978809	1.46409	-0.46451	1.00732	-0.778092	0.74047	-0.74047
DKK3	-0.56113	-0.965774	-0.318308	-0.544454	1.69454	0.695126	0.271701	-0.271701
DPT	-0.75511	-0.673817	0.45986	-0.567703	1.83168	-0.294909	0.512143	-0.512143
EMP1	1.83163	-0.838268	-0.250757	-0.910969	0.217485	-0.0491159	0.599451	-0.599451
FMOD	-1.11057	-1.41054	0.987961	0.403447	0.560259	0.569449	0.145882	-0.145882
MAMDC2	0.233031	1.84746	-0.528137	-0.563056	-0.0217507	-0.967548	-0.105619	0.105619
MYADM	0.449932	-1.66108	0.420929	-0.732652	1.04851	0.474361	0.639792	-0.639792
OGN	-0.537232	-1.18739	1.59729	0.37001	0.418946	-0.661617	0.493	-0.493
PDGFRB	-0.198844	-1.15756	-0.0707243	-0.875923	1.46479	0.838258	0.398407	-0.398407
PRELP	-0.368563	-1.08143	1.39557	-0.311981	1.07276	-0.706348	0.69992	-0.69992
VIM	1.04222	-0.633089	1.21975	0.327489	-0.931925	-1.02444	0.443346	-0.443346

## Sheet: THY1high Zscore
	siCtrl_1	siTEAD4_1	siCtrl_2	siTEAD4_2	siCtrl_3	siTEAD4_3	mean_siCtrl	mean_siTEAD4
ABL2	1.16351	-0.619683	0.214746	0.607442	0.295297	-1.66131	0.55785	-0.55785
ACKR3	-0.109022	-1.35084	0.231151	-0.907479	1.11686	1.01933	0.412996	-0.412996
ACTB	-0.0619712	-1.21684	-0.184445	1.60331	-0.741225	0.60117	-0.329214	0.329214
AEBP1	-0.371972	-1.56083	0.0395134	0.063705	1.52558	0.30401	0.397707	-0.397707
AK1	0.846454	1.12275	0.228221	-1.5966	-0.647706	0.0468861	0.142323	-0.142323
AKR1C1	-0.362423	1.95978	0.0344246	-0.242823	-0.734129	-0.654834	-0.354042	0.354042
AKR1C2	0.136456	1.93388	-0.177036	-0.671391	-0.691042	-0.530871	-0.243874	0.243874
ANGPTL1	-0.465685	-1.05162	0.283977	-0.782645	1.69791	0.318056	0.505402	-0.505402
ANGPTL2	0.54224	-1.00385	0.273735	-1.03218	1.5623	-0.342245	0.79276	-0.79276
ANGPTL5	-1.17386	-0.848607	0.959034	-0.457322	1.31567	0.205085	0.366948	-0.366948
ANXA1	1.42545	0.569128	0.496222	-0.826279	-0.426111	-1.23841	0.498519	-0.498519
ANXA4	0.709118	-1.16936	1.43984	-1.01805	-0.0793817	0.117824	0.68986	-0.68986
ANXA5	0.721147	1.61497	-0.472733	-0.819557	-0.986604	-0.0572259	-0.246063	0.246063
APLP2	0.540041	1.26203	-1.47585	-0.879357	0.201558	0.351572	-0.24475	0.24475
APOE	-0.613503	-0.379805	-0.426111	-0.906707	1.78364	0.542481	0.24801	-0.24801
APP	1.33759	-0.48104	-0.655161	1.138	-1.09289	-0.246509	-0.136819	0.136819
AQP1	-1.1951	0.101897	1.2832	-0.809529	1.04036	-0.420826	0.376152	-0.376152
ARID5B	0.928114	-1.25019	0.599567	-0.875284	1.09619	-0.498399	0.874624	-0.874624
ASPN	-0.613308	-0.700849	1.72021	0.72669	-0.522122	-0.610619	0.194926	-0.194926
B2M	-0.961728	1.5494	0.165088	-1.01181	-0.41356	0.672602	-0.4034	0.4034
BASP1	1.87682	0.104579	-0.514793	-1.01283	-0.0360651	-0.41771	0.441987	-0.441987
BGN	-0.889121	-1.54088	0.751538	0.0911286	0.826899	0.760438	0.229772	-0.229772
BST2	-0.717268	0.437789	-1.41624	0.318326	-0.0981313	1.47552	-0.74388	0.74388
BTG1	-0.0854579	-0.82945	0.340777	-1.42162	0.70119	1.29457	0.318836	-0.318836
C11orf96	1.04436	-0.597051	-0.531086	-1.10326	1.41482	-0.227779	0.642698	-0.642698
C1GALT1	-1.17504	0.00630668	-0.0212741	-0.078449	-0.550705	1.81916	-0.58234	0.58234
C1QTNF3	1.3152	-0.912299	0.082022	-0.931239	1.07885	-0.632536	0.825358	-0.825358
C2orf40	-0.874748	1.43722	-0.678045	-0.506332	-0.482681	1.10458	-0.678492	0.678492
CALU	-0.916947	1.09344	-0.684611	1.09466	-1.04314	0.456598	-0.881566	0.881566
CAPN2	1.55263	-0.317915	-0.0702913	0.773352	-0.906489	-1.03128	0.191949	-0.191949
CAV1	1.51536	0.908829	-0.416697	-1.02946	-0.200897	-0.777129	0.299254	-0.299254
CCNL1	-1.42005	-0.196572	-0.198881	-0.489697	1.21771	1.0875	-0.133742	0.133742
CD44	0.65551	-0.600849	-0.413352	-1.33134	1.49226	0.197776	0.578139	-0.578139
CD55	0.13338	-0.739375	0.131676	-1.22084	1.71099	-0.0158317	0.658683	-0.658683
CD59	-0.041157	1.10292	1.06304	0.0330398	-0.677289	-1.48055	0.114863	-0.114863
CD68	0.404787	0.179368	-1.40708	1.02614	-1.03716	0.833937	-0.679815	0.679815
CD74	-0.472308	-0.845964	-0.598436	1.42503	-0.634946	1.12663	-0.568563	0.568563
CD9	1.40372	0.148337	0.537344	-0.63232	0.0643903	-1.52147	0.668483	-0.668483
CD99	-0.692187	1.69037	-0.387278	0.3993	-1.15465	0.144442	-0.744706	0.744706
CERCAM	-1.00111	0.100637	-0.966298	-0.145001	0.295504	1.71627	-0.557301	0.557301
CFH	0.200077	-1.65858	0.858608	-0.514056	1.09882	0.0151335	0.719167	-0.719167
CFI	-0.432499	0.231362	-1.16755	-0.902995	1.15283	1.11885	-0.149073	0.149073
CILP	-0.294793	-0.781047	1.55757	-0.66005	0.933396	-0.755077	0.732058	-0.732058
CITED2	1.70513	-0.734478	0.189107	0.448112	-0.694655	-0.913216	0.399861	-0.399861
CLU	-0.403491	-1.52549	0.52839	-0.227619	1.46738	0.160826	0.53076	-0.53076
CNN3	-1.25799	1.01558	0.534804	1.05976	-0.8533	-0.498848	-0.525495	0.525495
COL14A1	-0.880458	-0.803528	1.79219	0.239772	0.178984	-0.526956	0.36357	-0.36357
COL1A1	-0.799518	-1.04154	-0.306775	1.59159	-0.218874	0.775114	-0.441722	0.441722
COL1A2	-0.794374	-1.17125	-0.0954342	1.35971	-0.317629	1.01898	-0.402479	0.402479
COL3A1	-0.857969	-0.754905	-0.720836	0.0288831	0.643761	1.66107	-0.311681	0.311681
COL5A1	-0.410426	-1.49035	0.135813	0.140878	1.60365	0.0204366	0.443012	-0.443012
COL5A2	-0.116601	-1.27924	-0.0506307	-0.684379	1.61713	0.513723	0.483299	-0.483299
COL6A1	0.0745081	0.815918	-1.59161	1.14781	-0.658233	0.21161	-0.725111	0.725111
COL6A2	0.502834	0.916818	-1.76294	0.783239	-0.430214	-0.0097361	-0.56344	0.56344
COL6A3	0.375884	-1.17194	1.09476	0.809314	0.159404	-1.26742	0.54335	-0.54335
COLEC12	0.889802	-0.899461	-0.261712	-1.23064	1.33762	0.164395	0.655236	-0.655236
COMP	-0.249994	-0.978809	1.46409	-0.46451	1.00732	-0.778092	0.74047	-0.74047
COX6C	-0.666868	1.99956	-0.18904	-0.364043	-0.595809	-0.183803	-0.483906	0.483906
CRABP2	-1.3476	-0.882397	0.970598	0.200455	1.18614	-0.127197	0.269713	-0.269713
CREB5	0.551351	-0.270054	-0.482628	-1.00353	1.75509	-0.550231	0.607937	-0.607937
CRIP1	1.18653	-0.086441	-0.756976	-1.1258	1.23927	-0.456579	0.556273	-0.556273
CRIP2	0.451067	-1.31887	0.160443	-1.02537	1.35566	0.377077	0.655722	-0.655722
CRTAC1	-0.0561543	-0.81934	-0.292356	-0.868378	1.85861	0.17762	0.503366	-0.503366
CST3	-0.663778	1.47161	-1.16588	0.162283	-0.605325	0.801086	-0.81166	0.81166
CTGF	-0.54001	-1.36837	1.33531	0.579672	0.595384	-0.601985	0.463562	-0.463562
CTHRC1	-1.47567	0.767078	0.775839	0.937751	-0.854411	-0.150589	-0.51808	0.51808
CTSK	0.55668	-0.451679	-0.771168	0.00431787	-1.02413	1.68598	-0.412873	0.412873
CXCL12	0.611801	-0.985969	1.09385	-1.24972	0.879341	-0.349308	0.861665	-0.861665
CYP1B1	1.22032	1.26583	-0.775251	-0.277726	-1.03545	-0.397719	-0.196796	0.196796
CYR61	-0.898396	-1.01474	0.381626	1.58816	-0.525156	0.468508	-0.347308	0.347308
DAB2	0.697686	-1.55843	1.28008	-0.0753005	0.264478	-0.608511	0.747415	-0.747415
DCN	-0.543145	1.1223	-0.267638	-1.45853	0.0309758	1.11604	-0.259936	0.259936
DDAH2	-1.11934	1.15306	-0.234203	-0.154819	-0.889025	1.24433	-0.747522	0.747522
DPT	-0.75511	-0.673817	0.45986	-0.567703	1.83168	-0.294909	0.512143	-0.512143
DPYSL3	-0.140705	-1.63055	0.553817	-0.537863	1.18174	0.573571	0.531616	-0.531616
DSTN	-0.244456	0.123751	1.95053	-0.586445	-0.580314	-0.663069	0.375254	-0.375254
ECM1	-0.462797	0.388531	-1.32115	0.462412	-0.591879	1.52488	-0.791943	0.791943
ECM2	-0.984351	-1.08751	1.66674	0.199623	0.17129	0.0342036	0.28456	-0.28456
EGR1	0.249259	-1.04326	0.926202	-0.920264	1.35169	-0.563628	0.842384	-0.842384
ELN	-0.711848	0.140311	-0.89641	-0.877586	0.899715	1.44582	-0.236181	0.236181
EMP1	1.83163	-0.838268	-0.250757	-0.910969	0.217485	-0.0491159	0.599451	-0.599451
ERRFI1	1.28297	1.14902	-0.147757	-0.977836	-0.335096	-0.971308	0.266707	-0.266707
FAM3C	0.112857	1.29049	0.321433	-0.106572	-1.78325	0.165041	-0.449653	0.449653
FAP	-0.020963	-0.228459	1.77419	-0.927824	0.318204	-0.91515	0.690478	-0.690478
FBLN1	-0.834556	-0.907621	-0.2296	-0.534138	1.222	1.28391	0.0526152	-0.0526152
FBLN2	0.263682	-0.899485	-0.903684	-0.777495	1.06891	1.24807	0.142969	-0.142969
FHL1	-0.887195	1.46558	-0.785169	0.988549	-0.678694	-0.103069	-0.783686	0.783686
FMOD	-1.11057	-1.41054	0.987961	0.403447	0.560259	0.569449	0.145882	-0.145882
FN1	-0.721811	-1.46814	1.13867	0.806735	0.538351	-0.293807	0.318405	-0.318405
FNDC1	-0.206469	-1.66691	1.00341	0.958875	0.308077	-0.39698	0.368339	-0.368339
FOS	1.4155	-0.808264	0.848414	-1.25852	0.00133766	-0.198464	0.755083	-0.755083
FOSB	0.102038	-0.594466	-0.363909	-0.845145	1.93286	-0.231381	0.556998	-0.556998
FSTL1	0.370664	-1.05224	0.836412	-1.07346	1.32	-0.401373	0.842358	-0.842358
GPNMB	0.458505	-1.90392	0.739255	-0.299734	0.609233	0.396665	0.602331	-0.602331
GPX3	0.342266	1.76281	-0.908718	-0.230289	-0.946662	-0.0194085	-0.504371	0.504371
GPX4	0.0776435	1.89503	-0.241957	-0.0986223	-0.779357	-0.852738	-0.314557	0.314557
GSN	2.01399	-0.444694	-0.444697	-0.65162	-0.159424	-0.313555	0.469956	-0.469956
HAS1	-0.375509	-0.344991	-0.488476	-1.21918	1.39708	1.03108	0.177697	-0.177697
HCFC1R1	0.472482	-1.60766	0.722319	-0.720603	1.07111	0.0623547	0.755304	-0.755304
HLA-A	-0.423508	1.55589	-1.10965	0.445464	-0.890029	0.421829	-0.807728	0.807728
HLA-B	-1.21415	-0.0533619	-0.923494	0.324896	0.291405	1.5747	-0.615412	0.615412
HLA-C	-0.281007	0.564923	-1.49001	-0.669211	0.641377	1.23392	-0.376546	0.376546
HLA-DPB1	-0.991966	-1.26069	0.0727314	0.8841	0.0153881	1.28043	-0.301282	0.301282
HLA-DRA	-0.945495	-0.848376	-0.452827	0.807418	-0.144524	1.5838	-0.514282	0.514282
HLA-DRB1	-0.478582	-0.0353842	-0.491217	1.73916	-1.1526	0.418617	-0.707466	0.707466
HSPG2	0.333284	-1.03512	-1.15671	0.727825	1.37483	-0.244099	0.183799	-0.183799
HTRA1	0.00364942	1.93245	-0.624887	-0.726672	-0.589139	0.00460352	-0.403459	0.403459
IER2	-0.758074	0.824382	-0.856754	1.49174	-0.870498	0.169202	-0.828442	0.828442
IGF1	0.321507	-0.421746	-0.20364	-0.968245	1.84657	-0.574443	0.654811	-0.654811
IGFBP5	-0.725825	0.403799	-1.11262	0.904617	-0.762946	1.29297	-0.86713	0.86713
IGFBP6	0.161308	0.569904	-1.03612	-0.815303	1.62863	-0.508418	0.251273	-0.251273
IRF1	1.12683	-1.6063	0.357512	-0.701386	0.720981	0.102365	0.735108	-0.735108
ISLR	-0.483761	-1.35065	0.707731	-0.565572	1.43312	0.259132	0.552362	-0.552362
ITGB8	1.70268	-0.635323	-0.384166	-1.08047	0.58809	-0.190803	0.635533	-0.635533
ITGBL1	0.730867	-1.01135	1.62339	-0.214334	-0.314454	-0.814124	0.679934	-0.679934
ITM2A	-1.19788	0.561888	-0.539109	1.26983	0.771714	-0.866436	-0.32176	0.32176
JUN	0.579354	1.02085	-1.85051	0.387246	-0.207198	0.0702642	-0.492785	0.492785
JUNB	0.289581	-0.995633	-0.465965	-0.876356	1.67296	0.37541	0.49886	-0.49886
LGALS1	0.909298	1.2347	-1.40901	-0.812264	0.0209245	0.0563426	-0.159594	0.159594
LHFP	1.81166	0.190728	-0.130303	-0.149398	-0.579947	-1.14274	0.367138	-0.367138
LMNA	1.84152	-0.542411	-0.991343	-0.0824903	0.274444	-0.499718	0.374873	-0.374873
LOXL1	-0.580253	-0.69222	-1.18061	0.258222	0.70064	1.49423	-0.353409	0.353409
LUM	0.169252	-0.934661	1.0632	-1.3465	1.0741	-0.0253865	0.768848	-0.768848
MALAT1	-0.527503	-1.01125	0.300131	-0.547488	1.81885	-0.0327415	0.530493	-0.530493
MEG3	-0.707236	-0.723097	-0.23863	-0.281859	1.95971	-0.0088911	0.337949	-0.337949
MFAP4	-1.12462	-1.32867	0.159163	0.561033	0.61361	1.11949	-0.117282	0.117282
MFAP5	-0.352403	1.70091	-0.212153	0.581305	-1.10846	-0.60919	-0.557674	0.557674
MFGE8	0.753446	1.67309	-0.759025	-0.265895	-0.745648	-0.655965	-0.250409	0.250409
MGP	-1.20447	-0.498151	0.96566	1.42683	-0.562665	-0.127203	-0.267158	0.267158
MMP2	0.0811674	-1.41919	-0.625503	-0.152719	0.654689	1.46155	0.0367846	-0.0367846
MMP3	0.78722	0.772947	-0.669778	-1.53439	0.9435	-0.299502	0.353647	-0.353647
MRC2	-0.0593816	-1.80538	0.464503	0.679526	0.992753	-0.272019	0.465958	-0.465958
MT1E	-0.269506	0.829081	-1.48346	-0.644201	0.339691	1.22839	-0.471092	0.471092
MT1M	0.428379	-0.142275	-1.26151	-0.899836	0.37333	1.50192	-0.153268	0.153268
MT1X	-0.217724	0.319265	-1.38006	-0.459154	0.0860375	1.65163	-0.503914	0.503914
MT2A	-0.328587	1.45484	-1.4465	-0.299834	-0.137718	0.757797	-0.6376	0.6376
MXRA5	0.148447	-1.36474	0.981105	-0.674502	1.25614	-0.346453	0.795232	-0.795232
MXRA8	0.429412	-1.4195	0.757486	-0.801256	1.24164	-0.207785	0.809512	-0.809512
MYADM	0.449932	-1.66108	0.420929	-0.732652	1.04851	0.474361	0.639792	-0.639792
NBL1	0.318107	1.88848	-0.754137	-0.429676	-0.343919	-0.678852	-0.259983	0.259983
NEAT1	-0.595321	-0.816469	-0.304705	-0.501922	1.87521	0.343207	0.325061	-0.325061
NPC2	-1.09416	0.964564	0.250885	0.568663	-1.40518	0.715235	-0.749487	0.749487
OGN	-0.537232	-1.18739	1.59729	0.37001	0.418946	-0.661617	0.493	-0.493
OLFML3	-1.11503	-1.18557	0.450207	1.15382	-0.18769	0.884266	-0.284172	0.284172
PDGFRB	-0.198844	-1.15756	-0.0707243	-0.875923	1.46479	0.838258	0.398407	-0.398407
PDGFRL	-1.13985	-0.106262	-0.636677	0.344221	-0.226202	1.76477	-0.667578	0.667578
PDLIM3	0.07914	-1.14886	0.12358	-0.609213	1.79696	-0.241602	0.66656	-0.66656
PHLDA1	1.43602	0.897614	0.101546	-0.51624	-0.875348	-1.04359	0.220739	-0.220739
PLA2G2A	1.3804	0.733982	-1.18357	-1.06376	0.151598	-0.0186532	0.116145	-0.116145
PLP2	1.31245	-1.13996	0.689323	-1.03434	-0.370938	0.54347	0.54361	-0.54361
PNRC1	0.885304	-0.837993	-0.366223	-1.38	0.976625	0.722284	0.498569	-0.498569
PPP1CC	-0.689903	1.73946	0.135556	0.0427123	-1.21572	-0.0121002	-0.590023	0.590023
PRELP	-0.368563	-1.08143	1.39557	-0.311981	1.07276	-0.706348	0.69992	-0.69992
PRG4	-0.332291	-0.726468	0.466363	-0.709272	1.8328	-0.531135	0.655625	-0.655625
PRRX1	1.0046	-0.974754	0.659302	-1.29727	0.911571	-0.303441	0.85849	-0.85849
PRSS23	-1.03161	1.79015	0.0270185	0.136631	-0.839603	-0.0825888	-0.614731	0.614731
PTGDS	-1.29427	-1.06048	1.28142	0.0977729	0.678573	0.296986	0.221907	-0.221907
PTMS	1.45994	-1.12028	-0.844482	-0.504788	0.24412	0.765488	0.286528	-0.286528
RABAC1	0.348587	1.84241	-0.174664	-0.918137	-0.487906	-0.610294	-0.104661	0.104661
S100A10	1.42455	-0.391796	-0.0681449	-1.472	0.762127	-0.254744	0.706178	-0.706178
SAT1	0.569769	-0.25525	-0.176754	-1.49265	1.52394	-0.169055	0.638985	-0.638985
SCARA5	-0.249413	-0.862665	0.809952	-0.889592	1.60485	-0.413127	0.721795	-0.721795
SEMA3C	0.773097	-0.737738	0.678467	-1.14491	1.21404	-0.782955	0.888536	-0.888536
SERPINF1	-0.324489	-1.46086	1.1424	-0.646642	0.965613	0.323978	0.594508	-0.594508
SERPINH1	-0.118153	-0.0731952	-1.46508	0.44912	-0.371977	1.57929	-0.651737	0.651737
SFRP4	-0.775228	-1.35916	0.0823654	-0.0785393	1.4321	0.698456	0.246414	-0.246414
SGK1	-0.734715	-0.832087	1.76204	0.325431	0.198784	-0.719454	0.408703	-0.408703
SMIM14	-0.46781	-0.61028	1.97076	-0.399265	0.102356	-0.59576	0.535102	-0.535102
SNX9	1.19617	-0.84305	0.674361	-1.08091	0.81217	-0.758741	0.894234	-0.894234
SOCS3	1.25052	-0.636804	-0.662349	-1.1904	1.0708	0.168238	0.55299	-0.55299
SOD2	1.30874	0.926654	0.228633	-1.23564	-0.396275	-0.832108	0.380365	-0.380365
SPARC	-1.33152	0.43955	-0.473964	1.25571	-0.727928	0.838156	-0.844472	0.844472
SPARCL1	1.95477	0.136393	-0.326899	-0.566465	-0.511811	-0.685987	0.37202	-0.37202
SPON2	-0.00109873	-0.632252	1.27674	1.15588	-0.987478	-0.811795	0.0960552	-0.0960552
SRPX	-0.108362	1.55618	-1.11309	0.280673	-1.03552	0.420125	-0.752326	0.752326
STEAP4	1.51324	-1.07025	0.643011	-0.952927	0.275728	-0.408801	0.810659	-0.810659
TAGLN	-0.567161	-0.885608	1.46346	1.0416	-0.287696	-0.764595	0.202869	-0.202869
TAGLN2	0.388013	1.69175	-0.906169	-0.937656	-0.478007	0.242069	-0.332054	0.332054
TFPI	0.770227	1.14971	0.590361	-0.918587	-0.236484	-1.35523	0.374701	-0.374701
THBS3	0.0738928	-1.20408	-0.294429	-0.800311	1.52623	0.698701	0.43523	-0.43523
THBS4	0.487495	-0.169357	-1.09747	-1.141	1.39806	0.522271	0.262695	-0.262695
THY1	-0.556088	0.155521	0.242302	1.78578	-1.03109	-0.596426	-0.448291	0.448291
TIMP1	0.0755308	-1.06397	0.688149	-1.28389	1.2848	0.299388	0.682825	-0.682825
TIMP3	-0.461038	-0.676065	0.24909	-0.872211	1.86965	-0.10943	0.552569	-0.552569
TM4SF1	0.0355732	1.97249	-0.597383	-0.272424	-0.689787	-0.44847	-0.417199	0.417199
TMEM176A	1.77902	0.587369	-0.678257	-0.331621	-0.678257	-0.678257	0.140837	-0.140837
TMEM176B	2.01404	-0.394352	-0.0947795	-0.560077	-0.482791	-0.482042	0.478824	-0.478824
TNC	0.621809	-1.00027	-0.151903	-0.969529	1.62313	-0.123237	0.69768	-0.69768
TNFAIP6	0.276438	-0.157329	-0.496854	-1.62581	1.02997	0.973589	0.26985	-0.26985
TNFRSF12A	-0.52659	1.79074	-0.928272	0.018777	-0.720942	0.366291	-0.725268	0.725268
TNXB	1.85168	0.0305	0.0272486	-0.797603	-0.158821	-0.953004	0.573369	-0.573369
TPM1	-0.331192	-1.20192	0.902384	-0.514907	1.49749	-0.351861	0.689561	-0.689561
TPPP3	0.150441	-0.730328	-1.29674	1.47069	-0.305517	0.711462	-0.48394	0.48394
TUBA1A	-0.080086	-1.25447	1.60857	-0.525447	0.637918	-0.38648	0.722133	-0.722133
TUBB2A	-0.802614	-0.389013	-0.739231	1.47724	-0.601713	1.05533	-0.714519	0.714519
TXNIP	-1.36837	0.521005	-0.590819	0.520891	-0.493978	1.41127	-0.817724	0.817724
UAP1	-1.22	1.43114	0.429676	0.524377	-0.985728	-0.179466	-0.592016	0.592016
VCAM1	-0.650387	-1.15369	-0.011245	-0.580952	1.33472	1.06155	0.224363	-0.224363
VCAN	-0.4461	-1.11518	0.879078	-0.393512	1.55057	-0.474854	0.661181	-0.661181
VIM	1.04222	-0.633089	1.21975	0.327489	-0.931925	-1.02444	0.443346	-0.443346
VKORC1	-0.377205	-0.185866	-0.191707	-1.35306	0.448038	1.6598	-0.0402914	0.0402914
WISP2	0.975289	-0.968693	0.870001	-0.936625	0.88864	-0.828611	0.91131	-0.91131
ZFP36	1.53867	-1.19062	-0.290937	-0.826231	0.660083	0.109038	0.635939	-0.635939
