# Supplementary material
Source: Research Square preprint supplement (doi:10.21203/rs.3.rs-9652440/v1)
Supplement: Supplementary file 5 [file bae7965f28868ba33aa4a03d.xlsx]

## Sheet: Supplementay Data 1 DIA-MS
Gene Symbol	Z_Veh 1	Z_Veh 2	Z_Veh 3	Z_4mix 1	Z_4mix 2	Z_4mix 3	log2_Veh 1	log2_Veh 2	log2_Veh 3	log2_4mix 1	log2_4mix 2	log2_4mix 3	AveExpr	log2FC (4mix/Veh)	t	P.Value	-log10(p)	adj.P.Val	B
RUNX3	-0.67	-1.31	-0.68	0.9	0.81	0.96	14.5	12.34	14.46	19.79	19.49	20	16.7633	5.99	10.1871	3e-05	4.52288	0.00387	3.20765
ASCL2	-0.64	-1.18	-0.86	0.88	1.07	0.74	14.03	12.48	13.42	18.42	18.97	18.04	15.8933	5.17	11.8292	1e-05	5	0.00285	4.13586
IRF5	-0.26	-0.99	-1.32	0.94	0.93	0.7	14.37	12.25	11.29	17.88	17.84	17.17	15.1333	4.99	6.67497	0.00038	3.42022	0.01517	0.54606
ARID5A	-0.83	-0.89	-1.01	0.86	0.97	0.9	13.21	13.08	12.83	16.73	16.98	16.83	14.9433	3.81	20.8938	3.41346e-06	5.4668	0.00071	7.31406
BHLHA15	-0.26	-1.12	-1.17	0.78	1.14	0.64	14.22	12.38	12.27	16.45	17.22	16.16	14.7833	3.65	6.38555	0.00049	3.3098	0.01788	0.27198
BATF3	-0.87	-0.83	-1.03	0.91	0.87	0.95	13.16	13.25	12.86	16.63	16.55	16.71	14.86	3.54	19.7367	3.41346e-06	5.4668	0.00071	7.03271
ETV7	-1.09	-0.67	-0.93	0.72	0.81	1.15	14.06	14.81	14.34	17.29	17.44	18.05	15.9983	3.19	10.9722	2e-05	4.69897	0.00304	3.67137
IRF8	-1.24	-0.79	-0.64	0.94	0.99	0.75	12.6	13.4	13.66	16.48	16.57	16.15	14.81	3.18	10.3516	3e-05	4.52288	0.00369	3.30806
BATF2	-0.52	-1.15	-1	0.83	0.98	0.86	14.08	12.97	13.23	16.45	16.73	16.52	14.9967	3.14	10.1758	3e-05	4.52288	0.00387	3.20072
IRF1	-0.98	-1.19	-0.49	0.96	0.87	0.83	18.15	17.81	18.93	21.26	21.12	21.05	19.72	2.85	9.39834	5e-05	4.30103	0.00472	2.70039
SOX3	-0.58	-0.95	-1.13	1.19	0.75	0.72	13.24	12.71	12.45	15.78	15.16	15.11	14.075	2.55	8.81625	7e-05	4.1549	0.00594	2.29627
FOSL1	-1	-1.06	-0.64	1.05	0.89	0.76	19.95	19.86	20.42	22.73	22.5	22.33	21.2983	2.44	11.0415	2e-05	4.69897	0.00304	3.71049
SOX17	-0.55	-0.57	-1.14	1.03	1.41	-0.19	13.8	13.76	12.85	16.33	16.93	14.37	14.6733	2.41	3.60593	0.00969	2.01368	0.09052	-2.94591
NFKB2	-0.68	-0.44	-1.4	0.63	0.63	1.26	19.62	19.94	18.62	21.42	21.43	22.3	20.555	2.32	5.62413	0.001	3	0.02616	-0.49964
ZNF274	-1.6	0.41	-0.9	0.55	0.71	0.82	12.69	15.99	13.84	16.21	16.49	16.67	15.315	2.28	2.93882	0.02343	1.63023	0.14394	-3.88096
CSRNP1	-1.03	-0.83	-0.86	1	0.95	0.78	15.71	15.95	15.92	18.23	18.16	17.95	16.9867	2.25	12.9697	1e-05	5	0.00224	4.69482
HIVEP3	0.36	-1.39	-1.15	0.7	0.59	0.89	16.06	13.38	13.75	16.57	16.4	16.87	15.505	2.22	3.25892	0.01521	1.81787	0.1166	-3.42606
ATF3	-0.81	-1.01	-0.91	0.91	0.83	0.99	18.02	17.78	17.89	20.09	19.99	20.19	18.9933	2.19	13.2602	1e-05	5	0.00224	4.82747
TBX3	-0.9	-1.05	-0.27	0.7	-0.06	1.59	16.36	16.15	17.26	18.67	17.57	19.96	17.6617	2.14	3.45897	0.0117	1.93181	0.10152	-3.14739
PLSCR1	-0.6	-0.87	-1.12	0.71	0.53	1.35	18.88	18.55	18.24	20.49	20.26	21.27	19.615	2.12	6.68753	0.00037	3.4318	0.0151	0.55773
ZNF254	-1.5	0.61	-1.04	0.83	0.66	0.44	13.06	16.49	13.81	16.85	16.57	16.22	15.5	2.09	2.49558	0.04348	1.36171	0.19637	-4.52243
MAFF	-0.87	-1.08	-0.73	0.95	1.16	0.56	19.83	19.59	19.99	21.94	22.18	21.49	20.8367	2.07	8.76669	7e-05	4.1549	0.00605	2.26061
POU2F2	-0.7	-0.89	-1.01	1.02	1.23	0.35	20.08	19.85	19.71	22.08	22.33	21.3	20.8917	2.02	6.81453	0.00033	3.48149	0.01432	0.67467
RELB	-0.69	-0.59	-1.26	0.62	0.52	1.4	17.6	17.72	16.95	19.09	18.98	19.98	18.3867	1.93	5.59914	0.00102	2.9914	0.02638	-0.52626
ARID3A	-0.71	-0.66	-1.27	1.07	0.97	0.6	19.98	20.04	19.39	21.86	21.75	21.36	20.73	1.85	7.4042	0.0002	3.69897	0.0107	1.19394
HIF1A	-0.97	0.45	-1.55	0.67	0.77	0.63	14.39	16.29	13.62	16.59	16.72	16.54	15.6917	1.85	2.8961	0.02484	1.60485	0.14778	-3.94235
RUNX2	-0.83	-0.93	-0.95	0.7	0.84	1.16	19.11	19.01	18.99	20.65	20.8	21.12	19.9467	1.82	9.73548	4e-05	4.39794	0.00433	2.92263
MAFB	-0.81	-0.79	-0.81	1.08	1.37	-0.05	17.23	17.26	17.24	19.37	19.7	18.1	18.15	1.81	4.43065	0.00356	2.44855	0.05209	-1.87253
RELA	-0.62	-0.63	-1.3	0.74	0.51	1.31	21.07	21.06	20.35	22.51	22.27	23.11	21.7283	1.8	5.84803	0.0008	3.09691	0.02316	-0.26481
MSC	-0.24	-0.83	-1.43	1.05	0.86	0.59	14.67	14.03	13.38	16.05	15.85	15.56	14.9233	1.79	5.19209	0.00155	2.80967	0.03224	-0.97249
IKZF2	-0.45	-1.81	0.24	0.91	0.42	0.69	15.91	14.14	16.82	17.7	17.06	17.41	16.5067	1.77	2.72346	0.03155	1.501	0.16718	-4.19165
STAT4	-0.31	0.01	-1.83	0.69	0.89	0.55	22.23	22.62	20.41	23.43	23.67	23.27	22.605	1.7	3.04229	0.02035	1.69144	0.13333	-3.73285
ETS1	-0.93	-1.08	-0.7	0.92	0.83	0.97	17.33	17.19	17.54	19.07	18.98	19.11	18.2033	1.7	9.88065	4e-05	4.39794	0.00426	3.01579
MTF1	-0.85	-0.6	-1.22	0.78	1.05	0.85	18.3	18.53	17.95	19.84	20.1	19.91	19.105	1.69	8.1112	0.00012	3.92082	0.00771	1.76901
SP110	-0.93	-0.66	-1.1	1.06	0.92	0.71	18.86	19.1	18.69	20.72	20.58	20.38	19.7217	1.68	8.72199	8e-05	4.09691	0.00612	2.22826
IRF7	-0.65	-0.86	-1.1	0.55	0.74	1.33	16.64	16.44	16.22	17.77	17.94	18.5	17.2517	1.64	6.62551	0.00039	3.40894	0.01548	0.49993
SATB2	-0.68	-0.35	-1.11	1.09	1.38	-0.33	17.94	18.3	17.45	19.95	20.28	18.33	18.7083	1.62	3.06333	0.01977	1.70399	0.13149	-3.70285
JUNB	-0.92	-0.76	-0.99	1.19	0.96	0.52	21.64	21.78	21.57	23.55	23.34	22.94	22.47	1.61	7.67055	0.00017	3.76955	0.00943	1.41639
NKX3-1	-1.02	-0.54	-1.08	1.19	0.56	0.89	16.95	17.37	16.89	18.91	18.36	18.64	17.8533	1.57	6.89213	0.00031	3.50864	0.01381	0.74521
FOXO3	-0.65	-0.94	-1.11	0.97	0.75	0.98	18.83	18.58	18.44	20.24	20.04	20.24	19.395	1.56	8.56428	9e-05	4.04576	0.00638	2.11281
MLX	-1.19	0.61	-1.35	0.82	0.34	0.78	14.33	16.44	14.14	16.69	16.14	16.65	15.7317	1.52	2.49499	0.04351	1.36141	0.19645	-4.52329
TRAFD1	-0.77	-0.74	-1.11	0.51	0.81	1.3	18.68	18.71	18.4	19.76	20.01	20.43	19.3317	1.47	6.46899	0.00045	3.34679	0.01695	0.35204
STAT5A	-0.84	-0.75	-0.7	0.31	0.23	1.75	21.04	21.13	21.18	22.13	22.05	23.49	21.8367	1.44	3.6395	0.00928	2.03245	0.08815	-2.90028
PRDM1	-0.26	-0.22	-1.71	0.95	1	0.24	18.09	18.13	16.67	19.28	19.32	18.58	18.345	1.43	3.21221	0.01619	1.79075	0.12049	-3.4918
BAZ2A	-0.67	-0.49	-1.32	1.17	1.05	0.27	19.86	20.01	19.31	21.43	21.33	20.66	20.4333	1.41	4.82961	0.00228	2.64207	0.04042	-1.39009
MLXIP	-0.87	-0.34	-1.37	0.92	0.76	0.9	17.79	18.21	17.38	19.22	19.09	19.21	18.4833	1.38	5.70721	0.00092	3.03621	0.02485	-0.4117
TCF4	-1.1	-1.18	-0.29	0.89	0.61	1.07	19.02	18.95	19.66	20.61	20.39	20.76	19.8983	1.38	5.59446	0.00103	2.98716	0.02638	-0.53127
NFKB1	-0.78	-0.47	-1.18	0.57	0.32	1.53	19.56	19.81	19.23	20.69	20.48	21.49	20.21	1.35	4.33786	0.00397	2.40121	0.0555	-1.98821
TEAD4	-1.68	-0.34	-0.26	0.97	0.36	0.96	14.05	15.22	15.29	16.36	15.82	16.35	15.515	1.32	3.53139	0.01066	1.97224	0.09587	-3.04775
ZFHX2	-0.49	-1.09	-1.08	1.04	0.77	0.85	15.34	14.89	14.9	16.47	16.27	16.33	15.7	1.31	6.74109	0.00036	3.4437	0.01477	0.60727
HIVEP2	-0.63	-0.72	-1.25	0.79	0.55	1.26	18.33	18.27	17.88	19.37	19.19	19.7	18.79	1.26	5.74348	0.00089	3.05061	0.02412	-0.37361
ZNF710	-0.77	-1.16	-0.75	0.87	1.15	0.66	16.66	16.38	16.66	17.79	17.99	17.65	17.1883	1.24	6.77883	0.00034	3.46852	0.01449	0.64199
FOSB	-0.44	-1.56	-0.41	1.2	0.69	0.53	17.22	16.36	17.25	18.48	18.09	17.97	17.5617	1.24	4.15073	0.00495	2.30539	0.06191	-2.22548
HOXC11	-0.88	-1.49	-0.05	0.85	0.89	0.69	15.7	15.25	16.3	16.96	16.99	16.84	16.34	1.18	4.16981	0.00483	2.31605	0.06143	-2.20105
ZNF267	-0.73	-0.59	-0.9	1.29	1.24	-0.31	15.43	15.54	15.3	16.99	16.95	15.75	15.9933	1.14	3.2083	0.01627	1.78861	0.12079	-3.4973
RBCK1	-0.68	-0.81	-0.81	0.31	0.23	1.76	17.9	17.81	17.81	18.59	18.54	19.6	18.375	1.07	3.45968	0.01169	1.93219	0.10152	-3.14641
NPAS2	-1.04	0.31	-1.4	0.54	0.41	1.19	16.37	17.37	16.09	17.54	17.45	18.03	17.1417	1.06	2.90221	0.02463	1.60854	0.14703	-3.93356
KLF5	-1.33	-1.05	0.01	1.14	0.78	0.46	16.92	17.09	17.77	18.49	18.26	18.06	17.765	1.01	3.74007	0.00818	2.08725	0.08185	-2.76456
REL	-0.82	-0.31	-1.33	0.48	0.61	1.37	18.14	18.45	17.83	18.93	19.01	19.47	18.6383	1	4.09655	0.00528	2.27737	0.06432	-2.29517
TMF1	-0.9	-0.58	-0.82	0.17	0.4	1.73	17.52	17.73	17.57	18.21	18.36	19.21	18.1	0.99	3.40519	0.01255	1.90136	0.10564	-3.22183
ZNF281	-0.58	-0.53	-1.34	0.95	1.28	0.22	19.86	19.89	19.4	20.79	20.98	20.34	20.21	0.99	4.03861	0.00566	2.24718	0.06688	-2.37018
SP100	-0.62	-0.85	-1.14	1.17	1.01	0.44	22.49	22.36	22.2	23.47	23.38	23.07	22.8283	0.96	5.06799	0.00176	2.75449	0.0348	-1.11328
RUNX1	-0.26	-0.55	-1.59	1.1	0.49	0.81	20.88	20.7	20.08	21.69	21.32	21.52	21.0317	0.96	3.74751	0.0081	2.09151	0.08144	-2.75456
PRDM2	-0.62	-0.49	-1.28	1.03	1.3	0.06	19.47	19.54	19.08	20.45	20.61	19.87	19.8367	0.95	3.69339	0.00867	2.06198	0.0849	-2.82737
ZBTB17	-1.32	-0.38	-0.88	0.63	1.1	0.85	17.33	17.83	17.57	18.37	18.62	18.49	18.035	0.92	4.68504	0.00267	2.57349	0.04447	-1.56212
BHLHE40	-1.02	-0.28	-1.17	1.06	1.14	0.28	17.79	18.19	17.71	18.91	18.95	18.49	18.34	0.89	4.00412	0.0059	2.22915	0.06811	-2.41508
FOXO1	-0.69	-0.58	-1.34	1.03	0.6	0.99	18.81	18.86	18.48	19.68	19.46	19.66	19.1583	0.88	4.78579	0.00239	2.6216	0.04166	-1.4419
BACH1	-1.32	-0.35	-0.81	0.49	1.35	0.65	17.82	18.32	18.08	18.75	19.19	18.83	18.4983	0.85	3.95154	0.00629	2.20135	0.07132	-2.48385
ZNF653	-0.82	-0.69	-1.19	0.96	0.84	0.91	16.2	16.27	16.03	17.04	16.99	17.02	16.5917	0.85	5.31061	0.00137	2.86328	0.03048	-0.84013
SETDB1	-0.52	-0.16	-1.4	0.93	1.36	-0.22	19.48	19.7	18.96	20.35	20.61	19.66	19.7933	0.83	2.60452	0.03728	1.42852	0.18186	-4.36418
KDM5B	-0.31	-0.51	-1.36	1.31	1.03	-0.15	19.47	19.36	18.88	20.39	20.23	19.56	19.6483	0.82	2.87843	0.02545	1.59431	0.1491	-3.96778
ETV3	-0.97	-0.84	-0.87	1.27	0.71	0.7	18.48	18.53	18.52	19.48	19.23	19.23	18.9117	0.8	4.90988	0.00209	2.67985	0.03799	-1.29594
MYBL2	-1.61	-0.29	-0.19	-0.05	1.02	1.12	15.52	16.28	16.34	16.42	17.03	17.09	16.4467	0.8	2.62614	0.03616	1.44177	0.17933	-4.33279
GLIS3	-0.32	-0.28	-1.69	0.65	1.15	0.48	18.06	18.08	17.35	18.56	18.81	18.47	18.2217	0.78	3.10011	0.01882	1.72538	0.12863	-3.65051
RFX3	-0.99	-0.93	-0.7	1.09	1.16	0.37	17.73	17.75	17.86	18.65	18.69	18.33	18.1683	0.78	4.38976	0.00374	2.42713	0.0536	-1.92334
SRF	-1.18	-0.92	-0.08	1.14	-0.16	1.19	20.51	20.65	21.09	21.73	21.05	21.76	21.1317	0.76	2.81012	0.02797	1.55331	0.1575	-4.0663
MAX	-0.61	-1.42	-0.31	1.21	1	0.13	21.63	21.25	21.77	22.49	22.39	21.98	21.9183	0.74	3.23188	0.01577	1.80217	0.1185	-3.46408
MEIS1	-0.86	-0.34	-1.31	1.2	0.39	0.92	18.58	18.8	18.38	19.46	19.12	19.34	18.9467	0.72	3.72263	0.00836	2.07779	0.08297	-2.78798
CEBPB	-0.18	-0.57	-1.6	0.82	0.41	1.11	22.46	22.29	21.84	22.91	22.73	23.03	22.5433	0.69	3.16825	0.01717	1.76523	0.12384	-3.55388
BAZ2B	-0.3	-0.23	-1.62	1.11	1	0.05	17.97	18.01	17.34	18.65	18.6	18.14	18.1183	0.69	2.66239	0.03437	1.46382	0.17506	-4.28018
NFATC1	-0.7	-0.68	-1.28	0.89	0.71	1.05	19.59	19.6	19.36	20.21	20.14	20.27	19.8617	0.69	4.19917	0.00467	2.33068	0.06082	-2.16356
E2F7	-0.71	-1.06	-0.47	0.04	1.7	0.5	15.01	14.85	15.11	15.35	16.11	15.56	15.3317	0.68	2.85716	0.02621	1.58153	0.15211	-3.99842
E2F8	-0.99	-0.83	-0.34	0.32	1.76	0.08	15.3	15.38	15.61	15.92	16.61	15.81	15.7717	0.68	2.6623	0.03437	1.46382	0.17506	-4.28031
AEBP2	-1.35	-0.61	-0.31	0.73	1.48	0.06	17.58	17.91	18.04	18.51	18.84	18.21	18.1817	0.68	2.91168	0.02432	1.61404	0.14623	-3.91994
ZFPM2	-0.93	-1.37	0.11	0.41	0.41	1.38	14.17	13.97	14.65	14.79	14.79	15.24	14.6017	0.68	2.74109	0.03079	1.51159	0.16601	-4.16612
SMAD1	-1.13	-1.19	-0.11	0.38	1.18	0.86	17.4	17.38	17.82	18.02	18.35	18.22	17.865	0.66	3.29374	0.01453	1.83773	0.11375	-3.37721
ELF4	-0.66	-0.35	-1.2	1.68	0.39	0.14	17.84	17.98	17.61	18.87	18.31	18.2	18.135	0.65	2.75341	0.03026	1.51913	0.16455	-4.14829
ZFP90	0.94	0.82	0.75	-0.78	-1.5	-0.22	18.08	18.04	18.01	17.42	17.14	17.63	17.72	-0.65	-3.46013	0.01169	1.93219	0.10152	-3.14579
ZSCAN26	0.97	1.18	0.47	-0.69	-1.15	-0.79	18.83	18.91	18.65	18.22	18.05	18.18	18.4733	-0.65	-3.89223	0.00677	2.16941	0.07445	-2.56193
ZBED5	0.35	1.4	0.43	-0.71	0.01	-1.49	18.78	19.25	18.81	18.3	18.62	17.95	18.6183	-0.66	-2.69675	0.03275	1.48479	0.16992	-4.23035
ZNF768	1.04	1.28	0.22	-0.78	-0.72	-1.04	18.94	19.03	18.62	18.23	18.25	18.13	18.5333	-0.66	-3.65138	0.00914	2.03905	0.08746	-2.88417
ZNF3	0.76	1.52	-0.03	-0.54	-0.41	-1.29	17.94	18.28	17.6	17.37	17.43	17.04	17.61	-0.66	-2.81795	0.02767	1.55799	0.15666	-4.05498
ZNF76	0.72	1.21	0.53	-0.3	-0.69	-1.48	15.02	15.22	14.94	14.61	14.45	14.13	14.7283	-0.66	-3.36916	0.01316	1.88074	0.10821	-3.27189
THYN1	0.82	0.3	1.15	-0.57	-1.6	-0.1	21.39	21.16	21.54	20.78	20.33	20.99	21.0317	-0.66	-2.88265	0.02531	1.59671	0.14882	-3.9617
ZNF25	0.81	0.9	0.6	-0.61	-0.03	-1.67	14.93	14.97	14.84	14.31	14.56	13.84	14.575	-0.68	-3.01238	0.02119	1.67387	0.13602	-3.77558
ZFPM1	1.41	0.13	0.85	-0.36	-1.2	-0.84	16.25	15.7	16.01	15.49	15.13	15.29	15.645	-0.68	-3.24071	0.01559	1.80715	0.11807	-3.45165
ARID5B	1.12	1.15	0.22	-0.45	-0.84	-1.21	20.43	20.44	20.05	19.77	19.6	19.45	19.9567	-0.7	-3.60748	0.00967	2.01457	0.09044	-2.94379
ZNF780A	0.39	1.28	0.65	-0.86	-0.03	-1.44	15.66	16.06	15.77	15.09	15.46	14.83	15.4783	-0.7	-3.10084	0.0188	1.72584	0.12863	-3.64946
TFAP4	0.62	0.47	1.1	-1.68	0.07	-0.58	18.26	18.19	18.49	17.15	18	17.68	17.9617	-0.7	-2.76161	0.02992	1.52404	0.16379	-4.13642
ZBTB4	1.23	0.98	0.29	-0.47	-0.72	-1.31	19.14	19.03	18.73	18.41	18.31	18.06	18.6133	-0.71	-3.61783	0.00954	2.02045	0.09003	-2.92972
ZNF8	1.06	1.19	0.18	-0.71	-0.38	-1.34	20.78	20.83	20.39	20	20.15	19.72	20.3117	-0.71	-3.38972	0.01281	1.89245	0.10668	-3.2433
NFIC	0.83	0.52	1.27	-1.03	-0.99	-0.61	22.6	22.47	22.78	21.83	21.84	22	22.2533	-0.73	-4.25477	0.00437	2.35952	0.05857	-2.0929
JRK	1.14	1.03	0.49	-0.85	-1.01	-0.81	17.19	17.14	16.91	16.34	16.28	16.36	16.7033	-0.75	-4.56119	0.00307	2.51286	0.04768	-1.71201
ZNF302	0.97	0.93	0.53	-0.45	-0.38	-1.6	16.23	16.21	16.02	15.56	15.6	15.02	15.7733	-0.76	-3.52618	0.01073	1.9694	0.09612	-3.0549
FOXK1	1.05	0.92	0.7	-0.55	-0.98	-1.14	22.3	22.24	22.15	21.61	21.43	21.36	21.8483	-0.76	-4.6513	0.00277	2.55752	0.04532	-1.60273
SMYD3	0.89	0.15	1.41	-0.72	-1.17	-0.56	18.44	18.09	18.69	17.68	17.47	17.76	18.022	-0.77	-3.61312	0.0096	2.01773	0.09023	-2.93613
ZSCAN18	1.23	0.29	1.01	-0.69	-1.25	-0.59	20.46	20.02	20.35	19.56	19.3	19.6	19.882	-0.79	-4.02911	0.00572	2.2426	0.0674	-2.38253
RFX2	1.06	0.7	0.91	-0.54	-1.18	-0.95	20.03	19.87	19.97	19.32	19.03	19.13	19.558	-0.8	-4.74981	0.00249	2.6038	0.04262	-1.48467
ZBTB20	0.94	1.27	0.34	-0.92	-0.52	-1.13	20.58	20.73	20.29	19.7	19.89	19.6	20.132	-0.8	-4.17778	0.00479	2.31966	0.06137	-2.19086
GTF2I	1.1	1.07	0.32	-0.48	-0.63	-1.38	24.34	24.32	23.96	23.57	23.49	23.13	23.802	-0.81	-3.91274	0.0066	2.18046	0.07361	-2.53487
PRDM5	1.15	1.25	0.08	-0.65	-0.8	-1.02	15.85	15.9	15.31	14.95	14.87	14.76	15.273	-0.83	-3.85437	0.00709	2.14935	0.07642	-2.61203
THRA	0.88	0.33	1.19	-1.11	-1.2	-0.09	16.19	15.9	16.35	15.14	15.1	15.68	15.727	-0.84	-3.60479	0.0097	2.01323	0.09052	-2.94746
KLF3	0.69	0.92	1.07	-0.96	-1.1	-0.62	19.9	20	20.07	19.11	19.05	19.28	19.568	-0.84	-5.15435	0.00161	2.79317	0.03318	-1.01506
ZNF512B	0.82	0.93	0.92	-0.85	-1.26	-0.56	19.32	19.37	19.36	18.52	18.32	18.66	18.925	-0.85	-5.03754	0.00182	2.73993	0.03551	-1.14816
EBF2	0.96	0.46	1.16	-0.86	-1.26	-0.45	17.65	17.4	17.75	16.74	16.55	16.95	17.173	-0.85	-4.42808	0.00357	2.44733	0.05209	-1.87572
AHDC1	0.88	0.83	1.01	-0.78	-1.01	-0.94	20.62	20.59	20.67	19.83	19.73	19.76	20.2	-0.85	-5.59514	0.00103	2.98716	0.02638	-0.53054
ZNF594	0.53	0.68	1.06	-0.87	0.15	-1.54	17.1	17.18	17.4	16.29	16.88	15.91	16.793	-0.87	-3.14663	0.01767	1.75276	0.12551	-3.58449
ZNF566	0.68	1.21	0.26	-1.3	0.25	-1.12	14.9	15.22	14.64	13.69	14.64	13.8	14.482	-0.88	-2.85271	0.02637	1.57889	0.15287	-4.00483
ZNF397	1.01	1.29	0.26	-0.98	-0.92	-0.67	18.83	18.97	18.44	17.79	17.82	17.95	18.3	-0.89	-4.5122	0.00325	2.48812	0.0492	-1.77195
ZBED6	0.53	1.29	0.62	-0.34	-0.64	-1.46	17.16	17.57	17.21	16.68	16.52	16.06	16.867	-0.89	-3.85781	0.00706	2.1512	0.07639	-2.60747
ZNF570	1.09	1.08	0.02	-1.14	0.09	-1.15	14.92	14.92	14.26	13.55	14.31	13.54	14.25	-0.9	-2.97423	0.02232	1.65131	0.14023	-3.83017
GTF2IRD2	1.23	1.08	0.12	-0.75	-1.26	-0.41	19.16	19.07	18.53	18.04	17.76	18.24	18.467	-0.91	-3.77092	0.00787	2.10403	0.08081	-2.7232
ZNF652	0.67	1.27	0.73	-1	-0.98	-0.67	17.46	17.76	17.49	16.6	16.61	16.77	17.115	-0.91	-5.27219	0.00142	2.84771	0.03106	-0.88281
ZNF358	0.46	0.7	1.06	-0.4	-1.73	-0.09	18.34	18.49	18.72	17.8	16.97	18	18.053	-0.93	-3.08076	0.01931	1.71422	0.13016	-3.67803
CREBL2	0.93	1.19	0.55	-0.97	-0.79	-0.92	17.19	17.32	16.99	16.19	16.29	16.22	16.7	-0.93	-5.52419	0.0011	2.95861	0.02763	-0.60667
ZNF688	1.22	0.45	0.98	-0.79	-0.99	-0.86	18.08	17.67	17.95	17	16.9	16.97	17.428	-0.94	-5.28564	0.0014	2.85387	0.03085	-0.86785
PITX1	0.61	1.57	0.29	-0.63	-0.95	-0.88	18.13	18.69	17.94	17.4	17.21	17.25	17.77	-0.97	-4.10933	0.0052	2.284	0.06374	-2.2787
GTF2IRD1	0.95	1.27	0.35	-0.89	-0.54	-1.14	19.39	19.56	19.05	18.35	18.54	18.21	18.85	-0.97	-4.73511	0.00253	2.59688	0.04287	-1.50219
ZHX2	0.83	0.93	0.94	-0.92	-1.12	-0.67	20.92	20.97	20.98	19.98	19.86	20.11	20.47	-0.97	-6.06196	0.00065	3.18709	0.02116	-0.04671
ZNF331	0.69	1.48	0.36	-0.83	-1.02	-0.68	18.53	19	18.34	17.65	17.53	17.73	18.13	-0.99	-4.50739	0.00326	2.48678	0.04927	-1.77786
ZNF362	1.1	1.19	0.31	-0.97	-0.7	-0.92	17.99	18.03	17.53	16.79	16.95	16.82	17.352	-1	-5.01123	0.00187	2.72816	0.03588	-1.17842
HOXC10	1.14	0.67	0.74	-0.36	-0.82	-1.37	19.26	18.98	19.02	18.36	18.09	17.76	18.578	-1.02	-4.77092	0.00243	2.61439	0.04194	-1.45955
SNAI2	1.31	0.9	0.14	-0.63	-0.31	-1.4	19.19	18.92	18.43	17.93	18.13	17.42	18.337	-1.02	-3.61052	0.00963	2.01637	0.09026	-2.93965
FLI1	0.65	0.19	1.44	-0.25	-1.44	-0.58	17.08	16.77	17.61	16.47	15.67	16.25	16.642	-1.02	-3.3415	0.01364	1.86519	0.10996	-3.31044
ZBTB44	1.29	0.84	0.48	-0.7	-1.17	-0.74	18.51	18.25	18.04	17.34	17.06	17.31	17.752	-1.03	-5.25175	0.00145	2.83863	0.03139	-0.9056
ZNF770	0.75	1.24	0.51	-1.15	-0.22	-1.13	16.87	17.18	16.72	15.69	16.27	15.71	16.407	-1.03	-4.38174	0.00377	2.42366	0.05396	-1.93334
ZNF12	0.39	1.43	0.63	-0.8	-0.37	-1.28	16.2	16.86	16.35	15.43	15.71	15.12	15.945	-1.05	-4.13663	0.00503	2.29843	0.06264	-2.24358
TP63	1.62	0.36	-0.04	-0.03	-1.42	-0.48	15.61	14.56	14.23	14.24	13.1	13.87	14.268	-1.06	-2.39752	0.04998	1.3012	0.21087	-4.66484
ZKSCAN1	1.08	0.8	0.55	-0.64	-0.23	-1.56	19.87	19.69	19.52	18.73	19	18.12	19.155	-1.08	-4.07141	0.00544	2.2644	0.06559	-2.32765
ZSCAN30	1.02	0.86	0.84	-0.87	-0.79	-1.06	17.88	17.78	17.77	16.75	16.8	16.64	17.27	-1.08	-6.89888	0.00031	3.50864	0.01379	0.75131
ZHX3	0.9	0.66	1.12	-0.8	-0.75	-1.13	20.16	20.01	20.3	19.1	19.13	18.9	19.6	-1.11	-6.44436	0.00046	3.33724	0.0172	0.32849
BNC2	0.97	0.96	0.76	-0.75	-0.71	-1.22	19.78	19.77	19.64	18.63	18.66	18.32	19.133	-1.19	-6.79573	0.00034	3.46852	0.0144	0.65747
NCOA2	0.84	0.56	1.17	-0.84	-1.3	-0.44	20.26	20.06	20.49	19.09	18.77	19.37	19.673	-1.19	-5.33004	0.00134	2.8729	0.03043	-0.81862
DBP	0.87	-0.18	1.53	-0.55	-1.13	-0.54	14.63	13.78	15.17	13.48	13.01	13.49	13.927	-1.2	-3.23617	0.01568	1.80465	0.11831	-3.45804
AHR	1.4	0.81	0.16	-0.22	-0.98	-1.17	22.49	22.04	21.54	21.25	20.67	20.53	21.42	-1.21	-3.85609	0.00707	2.15058	0.0764	-2.60974
ZBTB12	1.26	0.83	0.54	-0.66	-0.86	-1.11	17.39	17.09	16.89	16.06	15.93	15.75	16.518	-1.21	-6.03547	0.00067	3.17393	0.02136	-0.07339
ZBTB38	0.75	0.74	1.14	-0.83	-1.27	-0.53	16.89	16.88	17.16	15.77	15.46	15.99	16.358	-1.24	-6.03905	0.00067	3.17393	0.02136	-0.06978
TCF7L2	0.81	0.55	1.21	-0.79	-0.46	-1.32	18.89	18.69	19.17	17.73	17.96	17.35	18.298	-1.24	-5.34656	0.00132	2.87943	0.03033	-0.80038
GLI3	0.79	0.99	0.87	-0.86	-1.28	-0.51	18.78	18.92	18.84	17.6	17.29	17.85	18.213	-1.27	-6.38192	0.00049	3.3098	0.01788	0.26848
XPA	0.97	0.53	1.17	-0.97	-0.95	-0.75	17.51	17.19	17.65	16.11	16.12	16.27	16.808	-1.28	-6.8278	0.00033	3.48149	0.01432	0.68678
SIX4	0.84	0.62	1.23	-0.91	-0.83	-0.94	19.68	19.52	19.96	18.41	18.47	18.39	19.072	-1.3	-7.15663	0.00025	3.60206	0.01205	0.98056
ZNF84	0.76	-0.01	1.34	-1.58	-0.28	-0.23	15.33	14.61	15.89	13.12	14.35	14.4	14.617	-1.32	-2.86057	0.02609	1.58353	0.15158	-3.99351
NFIX	0.81	0.34	1.38	-1.03	-1.03	-0.46	22.5	22.12	22.95	21.03	21.03	21.49	21.853	-1.34	-5.00007	0.00189	2.72354	0.03607	-1.19128
ZKSCAN3	1.12	0.07	1.01	-0.82	0.04	-1.43	14.97	14.02	14.88	13.21	13.99	12.65	13.953	-1.34	-3.24647	0.01547	1.81051	0.11741	-3.44356
NFIA	1.1	1.27	0	-1.21	-0.67	-0.49	19.2	19.36	18.25	17.19	17.66	17.82	18.247	-1.38	-4.02802	0.00573	2.24185	0.0674	-2.38395
FOXC2	0.84	1.3	0.46	-0.59	-0.84	-1.17	17.07	17.44	16.77	15.92	15.72	15.46	16.397	-1.39	-5.88254	0.00078	3.10791	0.02308	-0.22921
CXXC5	0.62	1.09	0.63	-1.01	0.09	-1.42	19.14	19.56	19.15	17.67	18.66	17.3	18.58	-1.41	-3.83455	0.00727	2.13847	0.07699	-2.63834
ZNF580	1.2	0.58	0.91	-0.92	-0.96	-0.8	18.64	18.15	18.41	16.97	16.93	17.06	17.693	-1.41	-7.50005	0.00019	3.72125	0.01019	1.27483
NCOA1	1.09	0.84	0.72	-0.51	-1.23	-0.9	18.82	18.62	18.52	17.51	16.92	17.19	17.93	-1.45	-6.82967	0.00033	3.48149	0.01432	0.68849
ZSCAN31	0.45	1.13	0.32	-1.51	0.53	-0.92	15.27	16.06	15.12	13	15.36	13.68	14.748	-1.47	-2.40304	0.04959	1.30461	0.20995	-4.65683
KLF9	0.8	0.39	0.97	-1.75	-0.45	0.05	15.55	15.13	15.72	12.93	14.26	14.78	14.728	-1.48	-3.10496	0.01869	1.72839	0.1283	-3.64362
FOXQ1	1.13	0.61	0.38	-1.77	-0.26	-0.09	14.86	14.32	14.07	11.81	13.39	13.58	13.672	-1.49	-2.9952	0.02169	1.66374	0.1377	-3.80014
JDP2	0.88	0.83	0.96	-0.97	-1.19	-0.51	19.01	18.97	19.08	17.46	17.27	17.85	18.273	-1.49	-7.39348	0.00021	3.67778	0.01074	1.18484
NR2F2	0.28	0.09	1.81	-0.58	-0.66	-0.93	18.79	18.59	20.38	17.88	17.8	17.52	18.493	-1.52	-3.20294	0.01639	1.78542	0.12123	-3.50486
FOXN3	0.82	0.8	0.98	-0.59	-0.6	-1.42	17.34	17.32	17.49	16.05	16.04	15.29	16.588	-1.59	-6.34599	0.0005	3.30103	0.01803	0.23372
SKI	0.74	0.34	1.47	-0.98	-0.79	-0.78	17.84	17.45	18.52	16.22	16.4	16.4	17.138	-1.6	-5.50266	0.00113	2.94692	0.02805	-0.62991
ZNF354C	0.83	0.97	0.7	-1.43	-0.17	-0.9	14.38	14.51	14.25	12.19	13.41	12.7	13.573	-1.61	-5.048	0.0018	2.74473	0.03533	-1.13617
TBX18	0.95	0.8	0.96	-0.91	-1.12	-0.68	17.88	17.75	17.9	16.22	16.03	16.43	17.035	-1.62	-9.05457	6e-05	4.22185	0.00542	2.46496
SETDB2	1.08	0.79	0.79	-1.26	-0.79	-0.61	16.42	16.15	16.14	14.24	14.68	14.85	15.413	-1.65	-7.54222	0.00018	3.74473	0.00998	1.31012
FOS	-0.22	1.17	1.11	-0.51	-0.09	-1.44	16.13	17.8	17.73	15.77	16.28	14.65	16.393	-1.65	-2.81444	0.02781	1.5558	0.15697	-4.06006
ZNF260	0.6	0.85	0.48	-1.12	0.61	-1.43	16.19	16.53	16.03	13.85	16.2	13.44	15.373	-1.75	-2.51373	0.04237	1.37294	0.19327	-4.49607
NR1D2	0.68	0.69	1.27	-0.62	-1.14	-0.88	14.55	14.57	15.15	13.26	12.74	13	13.878	-1.76	-7.1871	0.00024	3.61979	0.01205	1.00718
TEF	0.7	0.48	1.14	-0.43	-1.65	-0.24	15.45	15.2	15.94	14.15	12.76	14.37	14.645	-1.77	-3.89874	0.00671	2.17328	0.07419	-2.55333
KLF4	0.75	0.71	1.13	-0.92	-1.3	-0.37	19.43	19.39	19.83	17.72	17.33	18.28	18.663	-1.77	-6.23936	0.00055	3.25964	0.01896	0.12964
NFIB	1.1	1.1	0.46	-0.84	-1.03	-0.79	21.91	21.91	21.26	19.96	19.76	20.01	20.802	-1.78	-7.63352	0.00017	3.76955	0.00951	1.3859
ZNF521	1.05	0.99	0.65	-0.67	-1.08	-0.94	20.46	20.39	20.04	18.68	18.26	18.4	19.372	-1.85	-9.02905	6e-05	4.22185	0.00546	2.44712
CPEB1	1	0.81	0.86	-1.3	-0.61	-0.75	18.11	17.91	17.96	15.69	16.42	16.27	17.06	-1.87	-7.97342	0.00013	3.88606	0.00794	1.66075
MITF	0.93	0.82	0.94	-1.09	-1.04	-0.56	20	19.89	20.01	17.81	17.87	18.38	18.993	-1.95	-9.3621	5e-05	4.30103	0.00472	2.676
ZNF69	0.91	1.16	0.41	-1.31	-0.93	-0.25	16.15	16.44	15.55	13.51	13.96	14.77	15.063	-1.97	-5.12689	0.00166	2.77989	0.03371	-1.04617
ZNF608	1.05	0.72	0.81	-0.98	-1.3	-0.3	15.84	15.45	15.56	13.51	13.14	14.29	14.632	-1.97	-6.20904	0.00057	3.24413	0.01936	0.09979
TRERF1	1.08	0.74	0.85	-0.69	-0.76	-1.23	17.41	17.03	17.15	15.45	15.37	14.85	16.21	-1.97	-8.684	8e-05	4.09691	0.00612	2.20064
ZNF555	0.32	0.07	1.8	-0.71	-0.56	-0.91	15.53	15.19	17.56	14.12	14.32	13.84	15.093	-2	-3.29677	0.01447	1.83953	0.11375	-3.37296
TCF7L1	0.82	0.32	1.2	-0.01	-1.01	-1.32	15.7	15.05	16.18	14.61	13.33	12.92	14.632	-2.02	-4.08164	0.00537	2.27003	0.06507	-2.31443
TP53	0.83	0.55	0.8	-0.56	0.13	-1.75	17.99	17.57	17.96	15.91	16.95	14.13	16.752	-2.18	-3.25583	0.01528	1.81588	0.11678	-3.4304
HSF2	0.44	0.82	1.04	-1.37	0.14	-1.08	15.37	15.92	16.24	12.76	14.93	13.18	14.733	-2.22	-3.8586	0.00705	2.15181	0.07639	-2.60641
ZNF184	0.49	0.99	0.71	-1.51	0.28	-0.95	15.66	16.44	16.01	12.58	15.34	13.44	14.912	-2.25	-3.32159	0.01401	1.85356	0.11188	-3.33824
MAF	0.77	0.71	1.09	-1.18	-1.12	-0.27	18.61	18.54	19.04	16.04	16.12	17.24	17.598	-2.26	-6.30672	0.00052	3.284	0.01834	0.19556
HOXA10	1.15	0.96	0.58	-0.79	-0.89	-1.01	20.13	19.9	19.4	17.66	17.53	17.37	18.665	-2.29	-9.76479	4e-05	4.39794	0.00433	2.94156
EBF1	1.13	0.83	0.72	-0.74	-0.74	-1.19	23	22.62	22.47	20.59	20.58	20.01	21.545	-2.3	-9.40558	5e-05	4.30103	0.00472	2.70525
CREB5	0.88	0.92	0.21	-0.2	0	-1.81	18.97	19.05	17.68	16.9	17.3	13.84	17.29	-2.55	-2.7362	0.031	1.50864	0.16619	-4.1732
EBF3	0.89	0.82	0.94	-0.71	-1.35	-0.58	20.97	20.87	21.05	18.6	17.64	18.79	19.653	-2.62	-8.23198	0.00011	3.95861	0.00717	1.86246
GLIS1	0.95	0.78	0.92	-1.17	-0.44	-1.04	16.35	16.11	16.31	13.16	14.26	13.36	14.925	-2.66	-8.61637	8e-05	4.09691	0.0062	2.15118
TSHZ1	0.74	1.07	0.85	-1.3	-0.72	-0.63	16.14	16.66	16.32	12.95	13.86	14	14.988	-2.77	-8.64621	8e-05	4.09691	0.00612	2.17305
PPARG	0.81	1.25	0.61	-0.96	-0.74	-0.96	15.67	16.36	15.37	12.89	13.24	12.89	14.403	-2.79	-9.69134	4e-05	4.39794	0.00433	2.894
ZSCAN22	0.96	0.66	0.58	-1.35	0.33	-1.17	19.15	18.56	18.41	14.64	17.92	14.98	17.277	-2.86	-3.38295	0.01292	1.88874	0.10727	-3.25272
NR4A1	0.96	0.75	0.64	-0.1	-0.6	-1.65	18.21	17.81	17.61	16.24	15.32	13.36	16.425	-2.9	-4.18541	0.00475	2.32331	0.06121	-2.1811
ZNF385D	0.52	0.95	0.62	-1.39	0.45	-1.15	17.31	18.22	17.52	13.22	17.15	13.75	16.195	-2.98	-2.98722	0.02193	1.65896	0.13859	-3.81157
ZNF34	0.92	0.58	0.57	-1.62	0.4	-0.85	17.85	17.1	17.1	12.32	16.71	13.99	15.845	-3.01	-2.92557	0.02386	1.62233	0.14511	-3.89998
DLX3	1.05	1.12	0.38	-0.82	-0.47	-1.27	20.8	20.93	19.59	17.38	18.03	16.57	18.883	-3.11	-6.3267	0.00051	3.29243	0.01828	0.215
HES1	0.74	0.88	0.94	-1.47	-0.73	-0.36	15.58	15.84	15.95	11.45	12.83	13.53	14.197	-3.19	-6.28078	0.00053	3.27572	0.01852	0.17024
OSR1	0.98	0.91	0.81	-0.61	-1.02	-1.07	17.18	17.04	16.88	14.29	13.55	13.45	15.398	-3.27	-12.3799	1e-05	5	0.0024	4.41365
ZNF449	0.84	0.84	0.98	-1.19	-1.01	-0.46	16.3	16.29	16.56	12.36	12.71	13.76	14.663	-3.44	-9.36043	5e-05	4.30103	0.00472	2.67487
HSF4	0.84	1.1	0.78	-0.84	-1.05	-0.83	17.06	17.57	16.94	13.73	13.32	13.75	15.395	-3.59	-15.0221	6.77885e-06	5.16884	0.00141	5.55827
CEBPD	0.69	0.73	0.67	-1.39	0.47	-1.18	19.59	19.69	19.53	14.1	19	14.66	17.762	-3.68	-3.02167	0.02092	1.67944	0.13521	-3.7623
DDIT3	0.91	0.67	0.68	0.25	-1.11	-1.4	18.67	18.04	18.05	16.97	13.46	12.73	16.32	-3.87	-3.69789	0.00862	2.06449	0.08454	-2.8213
NR0B1	0.65	0.72	1.2	-0.8	-1.34	-0.43	17.21	17.38	18.49	13.89	12.65	14.74	15.727	-3.93	-6.69486	0.00037	3.4318	0.0151	0.56452
HOXA11	1.01	0.89	0.68	-0.3	-1.25	-1.04	18.23	17.91	17.34	14.71	12.16	12.73	15.513	-4.63	-7.07351	0.00027	3.56864	0.0126	0.90744
ZNF703	0.89	0.79	0.99	-1.02	-1.15	-0.5	18.04	17.78	18.32	12.94	12.6	14.33	15.668	-4.76	-10.43	3e-05	4.52288	0.00369	3.35531
