# Supplementary material
Source: Research Square preprint supplement (doi:10.21203/rs.3.rs-9652440/v1)
Supplement: Supplementary file 6 [file bd198aab99d2c17f85c1a283.xlsx]

## Sheet: wPGSA of Nat Med scRNA-seq
TF	Lining_Act	Lining_Rem	HLAhigh_Act	HLAhigh_Rem	THY1high_Act	THY1high_Rem	GAS6+_Act	GAS6+_Rem	CD34+_Act	CD34+_Rem	Mean_Act	Mean_Rem	Lining_diff_t	HLAhigh_diff_t	THY1high_diff_t	GAS6+_diff_t	CD34+_diff_t	q_mean	Lining_q	HLAhigh_q	THY1high_q	GAS6+_q	CD34+_q	#ChIPexp
LMNA	-1.012	-5.2	-4.358	-2.437	5.579	-0.507	-1.643	-5.315	7.079	8.36	1.129	-1.02	4.188	-1.921	6.087	3.672	-1.281	0.000299	0	0.005008	1.6e-05	0.002636	0.037174	95
EPAS1	3.204	-4.343	-5.079	-2.136	5.46	-2.259	-4.527	-7.652	6.931	9.681	1.198	-1.342	7.547	-2.943	7.719	3.125	-2.75	1e-06	0	0.000171	1e-06	0.004174	0.00099	73
ARID1A	-0.402	-3.958	-6.097	-2.803	5.186	-0.37	-2.613	-5.681	7.488	9.23	0.712	-0.716	3.556	-3.293	5.555	3.068	-1.742	0.000316	2.1e-05	1.4e-05	0.000118	0.012306	0.007533	76
FOSL2	0.333	-4.346	-6.012	-2.908	5.12	-1.024	-3.265	-6.14	7.915	10.023	0.818	-0.879	4.679	-3.104	6.145	2.875	-2.108	4.8e-05	0	1.9e-05	2.5e-05	0.010837	0.002113	75
TEAD1	-2.159	-6.467	-4.769	-2.632	5.108	-1.141	-0.823	-5.523	8.294	10.344	1.13	-1.084	4.308	-2.138	6.249	4.7	-2.049	7.2e-05	0	0.001823	2.3e-05	0.000253	0.005837	61
FOSL1	-0.028	-4.445	-5.615	-2.277	4.693	-0.822	-3.561	-5.975	7.504	9.978	0.599	-0.708	4.417	-3.338	5.515	2.413	-2.474	9.1e-05	0	1.7e-05	0.000169	0.027558	0.000518	46
KLF4	-0.875	-3.639	-7.126	-3.689	4.684	0.64	-3.432	-4.691	7.452	10.526	0.141	-0.171	2.763	-3.437	4.044	1.259	-3.074	0.000633	0.000754	2e-06	0.002949	0.201466	0.000109	40
TP53	-1.893	-8.016	-3.778	-2.218	4.679	-1.586	-0.131	-2.804	6.248	11.088	1.025	-0.707	6.124	-1.56	6.265	2.673	-4.84	2e-06	0	0.016382	2.8e-05	0.032898	0	376
MGMT	-0.503	-3.68	-6.741	-2.508	4.645	-0.323	-4.985	-5.482	7.552	11.086	-0.006	-0.182	3.177	-4.233	4.968	0.497	-3.534	0.000213	0.000189	1e-06	0.000829	0.29145	1.3e-05	1
SMARCA2	-1.085	-5.222	-4.703	-1.698	4.472	-0.294	-1.451	-4.925	6.968	8.564	0.84	-0.715	4.137	-3.004	4.767	3.474	-1.597	0.000355	1e-06	0.000156	0.00138	0.003313	0.012273	29
HIF1A	2.901	-4.299	-5.3	-0.749	4.46	-1.541	-5.671	-7.549	6.194	11.26	0.517	-0.576	7.2	-4.551	6.001	1.879	-5.066	0	0	1e-06	0.000123	0.050038	0	130
RORC	-1.534	-2.978	-2.279	-4.197	4.397	-1.74	3.008	-1.574	4.418	2.33	1.602	-1.632	1.444	1.918	6.137	4.582	2.088	0.004798	0.034356	0.259364	2.8e-05	0.0004	0.025764	2
DMC1	0.059	-3.116	-1.407	-5.263	4.274	-2.421	2.888	-1.202	3.954	1.731	1.954	-2.054	3.175	3.856	6.695	4.09	2.224	0.001001	0.000202	0.013292	1.3e-05	0.001334	0.021958	8
TFAP2A	-0.514	-3.523	-4.616	-2.839	4.167	-0.833	-1.417	-4.161	6.037	7.522	0.731	-0.767	3.009	-1.777	5	2.743	-1.485	0.003718	0.000255	0.004842	0.000648	0.030946	0.028678	45
SMARCA4	-0.456	-3.646	-5.618	-2.628	4.137	-0.556	-2.679	-4.785	6.778	9.134	0.432	-0.496	3.191	-2.989	4.693	2.105	-2.357	0.001068	0.000125	5.8e-05	0.001518	0.071533	0.001761	326
SS18	-1.123	-4.72	-5.396	-2.152	4.087	-0.275	-2.631	-4.637	6.951	10.103	0.378	-0.336	3.598	-3.244	4.362	2.007	-3.152	0.000322	1.1e-05	3.2e-05	0.002673	0.078021	4.8e-05	38
ESR1	0.008	-3.539	-4.647	-2.264	4.061	0.142	-1.584	-4.128	5.531	6.996	0.674	-0.559	3.547	-2.383	3.919	2.544	-1.465	0.002833	2.9e-05	0.001035	0.005575	0.035472	0.030545	1220
MYOD1	-1.135	-3.025	-4.436	-1.39	4.05	1.276	-2.71	-4.364	5.065	7.262	0.167	-0.048	1.891	-3.046	2.774	1.654	-2.196	0.008514	0.015056	0.000211	0.026589	0.121039	0.004383	31
SMARCC1	-1.181	-4.625	-5.332	-2.184	3.982	-0.152	-2.913	-4.878	7.188	10.093	0.349	-0.349	3.444	-3.149	4.134	1.965	-2.904	0.000559	2.3e-05	4.8e-05	0.003739	0.096215	0.000138	84
TFAP2C	0.22	-2.845	-4.992	-3.62	3.967	-1.219	-1.743	-4.161	5.978	7.533	0.686	-0.863	3.066	-1.371	5.186	2.418	-1.555	0.004533	0.000296	0.008634	0.00056	0.053581	0.024919	45
KLF5	0.327	-2.883	-7.226	-3.798	3.917	-0.175	-5.178	-4.686	7.208	11.586	-0.191	0.009	3.21	-3.428	4.091	-0.493	-4.378	0.00015	0.000281	2e-06	0.004481	0.452253	0	41
ASCL2	-0.041	-2.467	-5.562	-4.303	3.862	-2.048	-2.159	-3.899	6.553	8.664	0.53	-0.811	2.426	-1.259	5.91	1.74	-2.111	0.003978	0.003564	0.007698	0.000183	0.117705	0.001683	4
KAT6A	-0.302	-3.246	-4.488	-3.18	3.848	-1.41	-1.792	-4.305	6.404	7.759	0.734	-0.876	2.944	-1.308	5.257	2.514	-1.355	0.005076	0.000252	0.0163	0.000566	0.043549	0.033357	5
TFEB	0.414	-3.909	-4.933	-3.437	3.825	-2.262	-1.638	-4.825	6.682	9.25	0.87	-1.036	4.322	-1.495	6.087	3.186	-2.569	0.000319	1e-06	0.005558	0.00011	0.009517	0.00063	10
ASPSCR1	-0.382	-4.419	-4.892	-2.35	3.821	-0.16	-2.687	-4.742	6.56	9.255	0.484	-0.483	4.037	-2.542	3.981	2.055	-2.696	0.000756	2e-06	0.000548	0.005476	0.072506	0.000636	17
TP63	-0.66	-3.469	-6.546	-4.449	3.811	-0.274	1.444	-1.808	5.231	7.137	0.656	-0.573	2.809	-2.097	4.085	3.252	-1.906	0.001872	0.000381	0.000315	0.003485	0.009835	0.005592	104
SMAD2	-0.574	-5.081	-4.251	-1.544	3.792	-1.944	-2.003	-4.983	6.858	9.619	0.764	-0.787	4.507	-2.707	5.736	2.981	-2.761	0.000141	0	0.000669	0.000222	0.016867	0.000453	46
MEAF6	-0.635	-3.571	-4.846	-2.955	3.76	-1.571	-1.785	-4.207	6.646	8.516	0.628	-0.758	2.936	-1.892	5.331	2.422	-1.87	0.002985	0.000322	0.002962	0.000572	0.057502	0.007545	4
ARNT	2.846	-4.539	-4.157	-0.764	3.749	-2.252	-4.486	-7.014	6	10.126	0.79	-0.889	7.385	-3.393	6.001	2.528	-4.126	1e-06	0	0.000102	0.00019	0.016867	1e-06	87
TEAD4	-2.217	-5.663	-4.775	-1.796	3.728	-0.493	-2.117	-4.689	7.51	10.715	0.426	-0.385	3.446	-2.979	4.221	2.573	-3.205	0.000391	1.1e-05	0.000132	0.004275	0.032898	4.4e-05	76
TET2	0.254	-2.418	-5.103	-2.525	3.719	-0.845	-2.548	-4.815	5.874	7.915	0.439	-0.538	2.672	-2.578	4.564	2.267	-2.041	0.003799	0.001747	0.0005	0.002707	0.056594	0.00591	57
KLF3	0.264	-2.183	-5.788	-4.134	3.701	-0.775	-2.157	-3.64	5.993	7.699	0.402	-0.607	2.447	-1.654	4.475	1.483	-1.706	0.007856	0.002814	0.001777	0.002949	0.179898	0.011282	2
BCORL1	-0.113	-2.819	-4.896	-3.284	3.442	-1.064	-1.944	-3.678	5.836	7.728	0.465	-0.623	2.706	-1.612	4.505	1.734	-1.892	0.006857	0.001231	0.00436	0.002949	0.133735	0.007163	4
SMARCC2	-1.109	-4.274	-4.888	-2.692	3.432	-1.084	-1.35	-3.256	6.564	8.591	0.53	-0.543	3.164	-2.196	4.515	1.906	-2.027	0.003178	0.000139	0.001168	0.003246	0.117722	0.005213	15
DDIT3	-0.606	-4.332	-4.026	-0.829	3.422	-1.099	-3.253	-5.493	6.301	9.571	0.368	-0.436	3.726	-3.197	4.521	2.24	-3.27	0.000418	7e-06	0.000238	0.003251	0.057278	4.1e-05	21
SMAD4	-0.212	-3.895	-4.351	-1.692	3.384	-1.384	-3.183	-4.84	6.408	9.15	0.409	-0.532	3.683	-2.659	4.768	1.657	-2.741	0.001051	1.3e-05	0.000583	0.002504	0.12333	0.00056	37
JUN	-0.365	-4.946	-5.155	-0.945	3.372	-0.959	-4.097	-5.807	7.224	11.495	0.196	-0.232	4.581	-4.21	4.331	1.709	-4.271	2.7e-05	0	2e-06	0.004516	0.10924	0	205
CTCFL	-0.628	-3.296	-2.984	-1.606	3.368	-0.528	-2.268	-3.986	5.097	6.754	0.517	-0.532	2.668	-1.379	3.896	1.718	-1.656	0.015253	0.000982	0.033945	0.008501	0.129204	0.022544	30
FOS	0.517	-4.276	-4.523	-0.973	3.361	-1.172	-3.971	-6.123	6.769	9.76	0.431	-0.557	4.793	-3.55	4.532	2.152	-2.991	0.000117	0	3.1e-05	0.003251	0.058483	0.000104	70
NCAPH2	0.289	-2.013	-4.716	-3.105	3.335	-1.147	-2.598	-4.172	5.606	7.446	0.383	-0.598	2.302	-1.611	4.482	1.574	-1.841	0.009431	0.00476	0.005008	0.003246	0.130439	0.007392	8
HNRNPC	0.321	-2.304	-4.38	-3.324	3.328	-1.758	-2.635	-4.192	5.705	7.648	0.468	-0.786	2.625	-1.056	5.086	1.556	-1.942	0.008882	0.00178	0.022118	0.001518	0.13883	0.006662	2
TFAP2B	0.117	-2.371	-3.879	-1.989	3.308	-0.256	-2.231	-4.064	4.768	6.19	0.417	-0.498	2.487	-1.89	3.564	1.833	-1.422	0.016204	0.002875	0.00646	0.012174	0.112513	0.043915	3
FLI1	-0.949	-4.032	-4.78	-1.091	3.288	-0.151	-3.131	-4.342	5.968	9.536	0.079	-0.016	3.083	-3.689	3.439	1.21	-3.567	0.000896	0.000189	2.7e-05	0.016863	0.201466	3.4e-05	102
NFE2L2	0.2	-6.084	-4.386	-0.638	3.266	-2.226	-2.683	-4.74	7.05	10.46	0.69	-0.646	6.284	-3.747	5.492	2.056	-3.41	7e-06	0	2.6e-05	0.000872	0.064635	3e-05	41
CHD6	-1.085	-3.297	-4.33	-2.25	3.256	-0.85	-1.222	-3.823	5.854	7.525	0.495	-0.539	2.212	-2.08	4.106	2.601	-1.671	0.009386	0.00445	0.00297	0.007044	0.046239	0.016922	13
SMAD3	0.011	-3.929	-4.85	-0.897	3.229	-0.642	-4.051	-5.267	6.088	9.982	0.086	-0.151	3.941	-3.953	3.871	1.217	-3.893	0.000183	4e-06	9e-06	0.010264	0.178176	3e-06	44
EBF1	0.307	-3.232	-4.254	-2.565	3.229	-1.026	-2.69	-4.109	5.606	8.078	0.439	-0.571	3.539	-1.689	4.254	1.419	-2.472	0.003393	5e-05	0.006936	0.005388	0.183972	0.0013	32
EGR1	0.525	-3.943	-4.647	-1.718	3.221	-2.348	-3.714	-5.263	6.621	10.263	0.401	-0.602	4.468	-2.928	5.569	1.549	-3.642	0.000136	0	0.00022	0.000638	0.116629	8e-06	83
ZNF711	-1.093	-3.817	-4.783	-1.439	3.206	-0.634	-3.932	-4.157	6.321	10.019	-0.056	-0.006	2.724	-3.344	3.84	0.225	-3.698	0.001038	0.001134	6.8e-05	0.012174	0.372503	3e-06	7
FGFR1	0.203	-3.693	-4.378	-1.244	3.15	-1.352	-4.698	-5.255	6.262	10.376	0.108	-0.234	3.897	-3.134	4.501	0.556	-4.114	0.000249	6e-06	0.00018	0.003653	0.29145	1e-06	15
SMARCB1	-1.155	-2.988	-5.942	-1.437	3.118	0.288	-3.14	-4.436	6.277	9.357	-0.168	0.157	1.833	-4.505	2.83	1.296	-3.08	0.001192	0.01659	0	0.048915	0.190267	3.9e-05	51
ASCL1	-0.705	-2.662	-4.455	-1.958	3.104	0.05	-2.33	-3.598	5.009	7.555	0.125	-0.123	1.957	-2.497	3.055	1.268	-2.546	0.00934	0.011477	0.000847	0.031524	0.218816	0.00106	62
TCF4	-0.303	-4.223	-3.027	-1.526	3.061	-0.815	-0.491	-3.536	4.962	6.446	0.84	-0.731	3.92	-1.501	3.876	3.044	-1.483	0.003896	6e-06	0.026519	0.009906	0.018174	0.030831	29
RUNX3	0.301	-3.431	-3.344	-2.258	3.057	-1.56	-1.67	-3.972	5.484	7.105	0.766	-0.823	3.732	-1.087	4.616	2.302	-1.621	0.005077	1.4e-05	0.051574	0.003251	0.053019	0.026206	18
MAZ	-0.079	-3.43	-5.155	-1.859	3.05	-1.116	-4.357	-4.857	6.481	10.382	-0.012	-0.176	3.351	-3.295	4.166	0.5	-3.901	0.000424	0.000104	3.9e-05	0.007546	0.307807	1e-06	36
SUZ12	-0.755	-2.516	0.134	-1.599	3.042	-1.483	4.175	-1.694	2.037	-0.914	1.727	-1.641	1.761	1.733	4.525	5.869	2.951	0.001394	0.014838	0.108822	0.003147	1e-06	0.00147	192
ARNTL	-0.319	-3.208	-4.901	-1.401	3.041	-1.41	-2.548	-5.196	6.101	9.403	0.275	-0.362	2.89	-3.5	4.451	2.647	-3.302	0.000674	0.000586	3.5e-05	0.004648	0.039126	3.8e-05	59
WWTR1	-1.282	-3.944	-4.818	-2.633	3.027	-0.294	-0.984	-2.949	5.768	8.346	0.342	-0.295	2.662	-2.186	3.321	1.965	-2.578	0.005195	0.000525	0.001539	0.022864	0.103546	0.001978	15
GTF3C1	0.216	-2.041	-5.027	-3.247	3.026	-1.097	-2.753	-4.284	5.957	8.056	0.284	-0.523	2.257	-1.779	4.123	1.532	-2.1	0.008215	0.00512	0.002582	0.006934	0.129813	0.003143	10
KAT6B	-0.343	-2.38	-4.521	-2.731	3.023	-1.011	-1.833	-3.625	5.448	7.287	0.355	-0.492	2.037	-1.79	4.034	1.792	-1.839	0.013907	0.008868	0.005066	0.008501	0.130439	0.010442	1
RUNX2	-1.35	-4.494	-4.664	-1.161	3.017	0.103	-2.404	-3.707	5.896	9.437	0.099	0.036	3.143	-3.503	2.914	1.304	-3.542	0.000938	9.4e-05	4.3e-05	0.044821	0.190267	2.1e-05	12
NR3C1	-1.053	-5.482	-4.471	-1.95	3.006	-1.86	0.273	-3.112	6.288	9.143	0.809	-0.652	4.429	-2.521	4.865	3.385	-2.855	0.000154	0	0.000824	0.002273	0.00567	0.000306	466
CNOT3	-0.168	-2.453	-4.172	-2.677	2.999	-0.768	-1.314	-3.439	5.131	6.47	0.495	-0.573	2.285	-1.495	3.766	2.126	-1.339	0.019002	0.004655	0.011421	0.012077	0.094836	0.04069	3
BRPF3	0.576	-3.234	-4.74	-1.581	2.977	-1.409	-4.904	-5.21	6.117	10.28	0.005	-0.231	3.81	-3.16	4.386	0.306	-4.163	0.000236	2.3e-05	0.000106	0.00544	0.319131	0	3
MECOM	-0.395	-3.425	-4.39	-2.709	2.956	-1.665	-1.4	-3.679	6.058	8.017	0.566	-0.692	3.03	-1.681	4.621	2.28	-1.959	0.004985	0.000314	0.005753	0.003388	0.067025	0.007498	23
NELFCD	0.427	-3.342	-5.074	-1.122	2.913	-1.13	-4.578	-5.399	6.15	10.444	-0.032	-0.11	3.769	-3.953	4.043	0.821	-4.294	0.000162	1.3e-05	8e-06	0.009906	0.265317	0	16
MITF	-0.608	-4.202	-4.507	-1.929	2.913	-1.066	-1.4	-3.668	5.792	8.699	0.438	-0.433	3.594	-2.578	3.979	2.268	-2.907	0.001259	2.3e-05	0.000643	0.009906	0.063864	0.000334	56
DOT1L	-0.782	-8.181	-1.659	0.314	2.9	-4.502	-1.397	-5.468	7.677	11.145	1.348	-1.339	7.399	-1.973	7.403	4.071	-3.467	0	0	0.030245	1.3e-05	0.000987	1.2e-05	30
G3BP1	-0.481	-3.115	-3.278	-1.665	2.873	-1.209	-1.286	-3.763	5.041	6.524	0.574	-0.645	2.634	-1.613	4.082	2.476	-1.483	0.01285	0.001422	0.021251	0.008501	0.061298	0.022246	1
ZFX	-1.181	-3.899	-5.662	-0.955	2.843	-0.151	-5.132	-4.55	6.628	11.66	-0.501	0.421	2.718	-4.707	2.994	-0.581	-5.032	0.000123	0.001036	0	0.045989	0.47681	0	39
ZIC2	-0.432	-3.448	-2.394	-1.383	2.835	-1.069	-0.979	-3.042	4.157	5.762	0.637	-0.636	3.016	-1.011	3.904	2.063	-1.605	0.015207	0.000297	0.092854	0.010264	0.112521	0.025497	7
CDKN1B	0.08	-2.794	-3.835	-1.134	2.807	-0.413	-2.793	-4.209	4.747	7.257	0.201	-0.259	2.875	-2.7	3.22	1.416	-2.51	0.005737	0.00066	0.000849	0.031297	0.196959	0.001798	11
CHD1	-1.303	-9.156	-1.519	0.607	2.805	-4.325	-2.82	-6.846	8.836	13.491	1.2	-1.246	7.853	-2.127	7.13	4.026	-4.655	0	0	0.025472	2.9e-05	0.000787	0	27
MYH11	-0.504	-4.969	-3.841	-2.373	2.799	-2.709	-1.931	-4.109	6.728	10.165	0.65	-0.799	4.465	-1.468	5.508	2.178	-3.437	0.000448	0	0.016939	0.000993	0.085095	5.1e-05	10
MYCN	-1.23	-4.238	-3.779	0.089	2.775	-0.38	-4.155	-4.945	5.771	10.123	-0.124	0.13	3.008	-3.869	3.156	0.79	-4.352	0.000481	0.000233	4.1e-05	0.037622	0.268989	0	120
PGR	-0.629	-4.13	-4.514	-1.407	2.775	-0.51	-1.551	-3.355	5.532	8.393	0.322	-0.202	3.501	-3.107	3.285	1.804	-2.861	0.001578	2.2e-05	0.000229	0.028599	0.112513	0.00059	168
BRD9	-1.201	-5.222	-4.173	-0.164	2.736	-1.213	-3.629	-4.693	6.456	11.136	0.038	-0.031	4.02	-4.009	3.949	1.064	-4.681	8.3e-05	1e-06	1.5e-05	0.012174	0.242048	0	50
MPHOSPH8	-0.329	-2.404	0.948	-1.141	2.734	-1.952	0.893	-1.257	2.67	0.328	1.383	-1.285	2.075	2.089	4.686	2.15	2.341	0.026282	0.004952	0.059356	0.012174	0.129813	0.026999	19
RUNX1T1	-0.778	-3.298	-5.44	-2.892	2.727	-1.499	-2.615	-3.84	6.835	9.729	0.146	-0.36	2.521	-2.547	4.226	1.225	-2.894	0.002553	0.002145	0.000235	0.008657	0.229246	0.000109	19
GLIS1	0.383	-2.736	-2.894	-1.851	2.719	-0.579	-1.891	-3.678	4.276	6.024	0.518	-0.564	3.119	-1.043	3.298	1.787	-1.748	0.016147	0.000295	0.06282	0.02665	0.121264	0.018317	2
EGR2	0.13	-2.548	-3.013	-1.528	2.701	-1.218	-1.48	-3.216	4.022	5.84	0.472	-0.534	2.678	-1.484	3.919	1.736	-1.818	0.014263	0.001313	0.027294	0.010747	0.116574	0.013145	5
PATZ1	0.011	-3.379	-3.863	-1.751	2.678	-1.085	-2.617	-4.126	5.569	7.957	0.356	-0.477	3.391	-2.112	3.762	1.509	-2.388	0.00376	6.2e-05	0.00341	0.015087	0.150218	0.001574	9
ZFHX2	-0.245	-2.973	-3.304	-1.731	2.669	-0.548	-1.112	-2.635	3.967	6.085	0.395	-0.36	2.728	-1.572	3.217	1.523	-2.118	0.012575	0.000848	0.017589	0.0301	0.165012	0.004244	2
ZNF740	-0.494	-4.252	-1.919	-1.515	2.648	-2.194	-0.716	-2.616	4.428	6.217	0.789	-0.872	3.759	-0.404	4.842	1.9	-1.789	0.007411	1.6e-05	0.243333	0.003301	0.134118	0.013171	6
ERG	-0.901	-4.043	-5.424	-1.603	2.642	-1.212	-3.661	-3.889	6.456	11.404	-0.178	0.131	3.143	-3.821	3.853	0.229	-4.948	0.000161	0.000203	6e-06	0.014571	0.366382	0	120
ZNF750	-0.276	-1.974	-4.188	-1.966	2.637	-0.416	-1.197	-2.53	4.139	5.495	0.223	-0.278	1.698	-2.222	3.053	1.332	-1.356	0.032899	0.030184	0.002803	0.041603	0.229246	0.04776	1
KDM6A	0.595	-3.142	-4.482	-1.196	2.631	-1.307	-4.541	-5.069	5.559	10.016	-0.048	-0.14	3.737	-3.285	3.938	0.528	-4.457	0.000217	2.1e-05	8.7e-05	0.012263	0.29145	0	51
ETV6	-0.669	-3.667	-4.459	-0.481	2.627	-0.541	-4.879	-4.842	5.889	10.534	-0.298	0.201	2.998	-3.977	3.168	-0.037	-4.646	0.000372	0.000386	1.3e-05	0.03841	0.407122	0	67
VCP	0.44	-2.875	-5.149	-2.079	2.618	-0.958	-3.442	-4.33	5.662	9.47	0.026	-0.154	3.315	-3.07	3.576	0.887	-3.808	0.000781	0.000131	8.2e-05	0.022688	0.256317	5e-06	9
NME2	-1.1	-1.629	-1.552	-2.759	2.573	-1.18	2.776	0.16	2.099	0.043	0.959	-1.073	0.529	1.207	3.753	2.616	2.056	0.070797	0.254225	0.361249	0.009906	0.05106	0.038288	2
TRIM25	-1.091	-2.73	-4.323	-1.725	2.571	-0.523	-1.257	-3.291	5.093	7.156	0.198	-0.222	1.638	-2.599	3.094	2.033	-2.064	0.01442	0.026524	0.000789	0.041028	0.110086	0.006598	10
ETV1	-0.889	-3.868	-4.582	-1.088	2.551	-0.748	-3.713	-3.767	5.77	10.171	-0.173	0.14	2.979	-3.494	3.298	0.053	-4.401	0.000717	0.00049	4.5e-05	0.032934	0.40246	1e-06	14
OGT	0.43	-2.513	-3.436	-0.749	2.523	-0.768	-4.332	-4.85	4.751	8.246	-0.013	-0.127	2.943	-2.686	3.291	0.518	-3.495	0.002944	0.000699	0.001513	0.03338	0.295514	2.1e-05	5
GLIS2	-0.093	-2.442	-3.368	-1.672	2.52	-1.083	-2.206	-3.835	4.868	6.629	0.344	-0.481	2.349	-1.696	3.604	1.629	-1.761	0.01991	0.003719	0.014541	0.021761	0.146214	0.018181	2
BCOR	-0.19	-3.188	-3.943	-1.976	2.507	-1.285	-1.715	-3.572	5.204	7.686	0.373	-0.467	2.998	-1.967	3.792	1.857	-2.482	0.005268	0.000356	0.0053	0.015292	0.116629	0.001207	29
NETO2	-0.373	-2.974	-4.043	-2.477	2.496	-0.733	-2.344	-3.195	5.327	7.856	0.213	-0.305	2.601	-1.566	3.229	0.852	-2.529	0.009949	0.002114	0.007897	0.037528	0.292859	0.000531	6
EP300	-0.749	-5.541	-3.781	-0.182	2.495	-1.594	-2.188	-4.688	6.224	10.458	0.4	-0.309	4.792	-3.6	4.089	2.5	-4.234	4.7e-05	0	9.9e-05	0.010747	0.042881	0	429
PLAG1	-0.649	-3.051	-3.984	-2.318	2.494	-1.587	-2.143	-2.91	5.201	7.929	0.184	-0.388	2.402	-1.665	4.081	0.767	-2.728	0.008947	0.004716	0.010538	0.012174	0.314944	0.000301	3
HSF1	-1.749	-7.004	-3.643	-0.453	2.484	-2.527	-1.68	-3.996	7.66	11.253	0.614	-0.545	5.255	-3.191	5.01	2.316	-3.593	2.8e-05	0	0.000374	0.002383	0.067551	7e-06	119
SLBP	-0.168	-1.628	1.128	-1.79	2.483	-0.569	1.768	-2.221	1.381	-1.652	1.318	-1.572	1.46	2.917	3.052	3.989	3.033	0.023334	0.057091	0.014925	0.02194	0.023337	0.015854	4
PPP1R10	0.824	-4.57	-0.417	-1.403	2.473	-3.442	-2.047	-4.082	4.686	6.917	1.104	-1.316	5.394	0.986	5.915	2.035	-2.231	0.001056	0	0.320384	0.000648	0.098036	0.00458	11
ZFP3	-0.465	-2.323	-3.99	-2.553	2.458	-1.157	-1.558	-1.903	4.692	6.208	0.228	-0.346	1.858	-1.437	3.615	0.345	-1.516	0.037926	0.021569	0.015512	0.023396	0.40809	0.024563	6
SREBF2	0.497	-3.427	-4.256	-1.887	2.425	-1.855	-3.265	-4.4	5.939	9.246	0.268	-0.464	3.924	-2.369	4.28	1.134	-3.308	0.000875	1e-05	0.001341	0.008775	0.204303	2.2e-05	22
PAX8	0.717	-3.618	-3.518	-0.8	2.398	-1.902	-4.551	-5.093	5.61	9.985	0.131	-0.285	4.335	-2.719	4.301	0.542	-4.376	0.000335	2e-06	0.001492	0.009598	0.31079	0	17
ARID1B	-0.972	-4.486	-4.206	-0.905	2.351	-1.255	-3.493	-4.19	6.415	10.357	0.019	-0.096	3.514	-3.301	3.606	0.697	-3.942	0.000638	4.4e-05	0.000103	0.024742	0.282034	3e-06	20
FUS	0.495	-2.604	-4.938	-3.984	2.324	-2.214	-2.58	-3.391	5.964	9.162	0.253	-0.606	3.098	-0.954	4.538	0.812	-3.198	0.003277	0.000482	0.01596	0.006489	0.29145	2.6e-05	9
MED1	-0.571	-5.642	-4.359	-0.125	2.321	-1.604	-4.34	-5.076	6.848	12.474	-0.02	0.006	5.07	-4.234	3.925	0.736	-5.626	6e-06	0	7e-06	0.016185	0.256977	0	255
PHF2	0.451	-4.336	-2.886	-0.993	2.315	-2.463	-1.943	-4.645	5.968	8.18	0.781	-0.851	4.787	-1.892	4.777	2.702	-2.212	0.000771	0	0.015693	0.004351	0.030717	0.005948	2
ZBTB7A	-0.215	-3.003	-5.015	-2.084	2.302	-1.089	-3.421	-3.625	5.792	9.359	-0.111	-0.088	2.788	-2.93	3.391	0.204	-3.566	0.001664	0.00105	9.9e-05	0.032888	0.388784	1e-05	18
CSTF2	0.886	-6.532	-1.837	-1.883	2.301	-4.573	-2.287	-4.985	7.124	10.474	1.238	-1.5	7.419	0.046	6.875	2.699	-3.35	4e-06	0	0.353006	0.000102	0.037474	2.4e-05	18
SCML2	0.956	-5.394	-0.294	0.357	2.271	-1.012	-2.158	-4.317	3.669	6.038	0.889	-0.866	6.349	-0.651	3.283	2.159	-2.37	0.000783	0	0.312718	0.049812	0.088777	0.005737	10
EED	-0.781	-3.06	-3.207	-1.412	2.267	-1.666	-1.442	-3.863	5.326	7.28	0.433	-0.544	2.279	-1.794	3.932	2.421	-1.954	0.014334	0.004517	0.014541	0.015566	0.064853	0.009125	13
BATF	2.012	-2.611	-3.541	-0.626	2.259	-1.07	-5.034	-5.691	4.816	8.709	0.103	-0.258	4.623	-2.915	3.328	0.657	-3.893	0.000468	1e-06	0.00071	0.033747	0.204303	5e-06	26
DYRK1A	-1.424	-4.203	-2.895	0.521	2.229	-0.918	-2.602	-4.642	5.455	8.553	0.152	-0.138	2.779	-3.417	3.147	2.04	-3.099	0.002819	0.000318	0.000366	0.048666	0.098036	0.00032	8
ZNF777	-0.683	-2.926	-3.368	-1.865	2.229	-1.12	-2.132	-3.083	5	7.021	0.209	-0.394	2.243	-1.503	3.349	0.951	-2.021	0.026538	0.00512	0.021979	0.038369	0.284447	0.010718	4
CTBP2	-0.368	-3.093	-3.936	-0.964	2.222	-1.059	-2.575	-3.796	5.172	8.171	0.103	-0.148	2.726	-2.972	3.281	1.221	-3	0.004214	0.001217	0.000419	0.040796	0.216795	0.000295	20
ZNF148	-1.283	-4.724	-2.307	-1.464	2.22	-2.011	-0.932	-2.519	5.297	7.601	0.599	-0.623	3.442	-0.843	4.23	1.587	-2.305	0.008092	3.8e-05	0.126892	0.010483	0.188012	0.003642	4
ZBTB20	0.093	-1.492	-4.422	-1.84	2.195	-0.929	-3.105	-3.83	4.796	7.21	-0.089	-0.176	1.584	-2.582	3.124	0.725	-2.414	0.015171	0.044173	0.000721	0.046541	0.289366	0.001873	2
IKZF1	0.565	-2.979	-3.878	-1.793	2.191	-2.187	-2.725	-4.173	5.598	8.379	0.35	-0.551	3.544	-2.085	4.378	1.448	-2.781	0.003137	7.5e-05	0.004166	0.008501	0.15762	0.000729	35
ELAVL1	4.907	-7.022	5.037	0.546	2.187	-7.359	2.783	-3.701	6.429	-4.362	4.268	-4.38	11.929	4.491	9.546	6.484	10.791	4.9e-05	0	0.000575	0.000993	0.001908	1e-06	2
KDM4C	0.821	-1.472	-4.72	-1.565	2.157	-1.331	-4.716	-4.555	5.232	8.635	-0.245	-0.058	2.292	-3.155	3.489	-0.162	-3.403	0.003135	0.010085	0.00014	0.031524	0.41854	1.6e-05	9
AGO2	-0.18	-3.213	-4.321	-1.134	2.136	-1.772	-3.497	-4.123	5.762	9.469	-0.02	-0.155	3.034	-3.187	3.908	0.626	-3.707	0.001161	0.000316	0.000124	0.018917	0.307252	9e-06	7
USF2	-0.21	-4.21	-4.186	-0.638	2.127	-1.116	-3.504	-4.99	5.873	10.347	0.02	-0.122	4	-3.547	3.243	1.486	-4.474	0.000228	1.2e-05	5.5e-05	0.045122	0.150413	0	28
UPF1	-1.441	-1.425	-0.897	-2.984	2.09	-1.564	2.223	0.435	2.394	0.582	0.874	-0.991	-0.015	2.087	3.655	1.788	1.812	0.071195	0.454854	0.036618	0.030487	0.134118	0.026858	1
BRD1	-0.271	-4.66	-2.76	0.477	2.078	-2.506	-3.798	-5.174	6.142	10.095	0.278	-0.354	4.389	-3.237	4.584	1.375	-3.953	0.000237	1e-06	0.000794	0.007546	0.158875	1e-06	6
BCL11B	-0.008	-3.441	-4.159	-1.013	2.071	-1.261	-4.109	-3.837	5.338	9.791	-0.173	0.048	3.433	-3.145	3.332	-0.272	-4.453	0.000557	0.000108	0.000182	0.041603	0.442487	0	14
SKI	-0.523	-4.029	-4.002	-1.035	2.006	-2.26	-2.038	-3.282	5.605	9.066	0.209	-0.308	3.506	-2.967	4.265	1.244	-3.462	0.000954	4.4e-05	0.000282	0.011882	0.202937	2.6e-05	8
NCBP1	1.376	-3.214	-4.189	-0.922	1.959	-2.173	-5.272	-5.74	6.02	10.517	-0.021	-0.307	4.59	-3.267	4.132	0.468	-4.497	0.000157	1e-06	0.000131	0.014499	0.29145	0	4
CREBBP	0.328	-3.978	-4.43	-0.178	1.942	-1.68	-4.887	-5.52	6.219	11.514	-0.166	0.031	4.306	-4.252	3.622	0.634	-5.295	3.2e-05	1e-06	6e-06	0.030452	0.25883	0	65
RELA	1.912	-5.084	-1.685	-0.143	1.93	-3.269	-3.51	-6.143	5.456	9.631	0.821	-1.001	6.996	-1.542	5.199	2.633	-4.175	6e-06	0	0.068187	0.002707	0.016867	1e-06	326
ZNF281	-0.66	-4.398	-2.725	-0.956	1.904	-1.982	-2.032	-3.519	5.529	8.469	0.403	-0.477	3.738	-1.769	3.886	1.488	-2.94	0.003074	1.2e-05	0.020731	0.022141	0.169666	0.000299	6
GTF2I	0.085	-2.299	-3.392	-3.39	1.849	-2.524	-1.076	-2.845	5.252	6.579	0.543	-0.896	2.384	-0.002	4.373	1.769	-1.328	0.034727	0.004716	0.227355	0.01119	0.12333	0.034133	19
MAML1	0.886	-2.363	-3.778	-1.948	1.841	-1.617	-2.163	-3.94	4.72	7.507	0.301	-0.472	3.249	-1.83	3.457	1.777	-2.787	0.005089	0.000295	0.006305	0.036921	0.13883	0.000358	7
RTF1	1.959	-2.313	-1.788	-1.052	1.837	-3.492	-3.222	-5.607	4.913	6.891	0.74	-1.115	4.272	-0.736	5.329	2.385	-1.978	0.004615	4e-06	0.19309	0.002504	0.060332	0.018981	10
CPSF3	0.883	-4.21	-2.699	-0.88	1.824	-3.135	-3.399	-4.056	5.229	9.146	0.367	-0.627	5.093	-1.819	4.958	0.657	-3.918	0.000203	0	0.019391	0.004247	0.29145	1e-06	18
ARID2	-0.513	-4.021	-3.928	-0.06	1.706	-1.766	-3.802	-4.592	5.885	10.488	-0.13	0.01	3.508	-3.868	3.472	0.79	-4.603	0.000252	3.3e-05	4.1e-05	0.040893	0.278813	0	49
CEBPD	-0.629	-5.526	-2.95	0.221	1.702	-1.743	-0.731	-4.215	5.996	8.541	0.678	-0.545	4.898	-3.171	3.445	3.484	-2.545	0.000252	0	0.000776	0.039057	0.005804	0.001259	12
BACH1	-0.199	-4.327	-3.693	-1.069	1.665	-1.787	-3.534	-3.456	5.928	9.806	0.034	-0.167	4.129	-2.624	3.452	-0.078	-3.878	0.000787	3e-06	0.00167	0.049651	0.421779	3e-06	19
TFE3	0.183	-4.194	-3.7	-0.72	1.665	-2.168	-2.051	-3.861	5.326	8.991	0.284	-0.39	4.378	-2.981	3.832	1.81	-3.665	0.000393	1e-06	0.00058	0.025738	0.12333	9e-06	20
BCL3	0.235	-5.411	-4.38	0.645	1.643	-2.174	-5.028	-5.895	6.81	13.148	-0.144	0.063	5.646	-5.026	3.816	0.867	-6.338	1e-06	0	1e-06	0.028666	0.231195	0	37
CEBPB	-0.362	-6.209	-2.557	-0.577	1.56	-2.973	0.111	-4.324	6.9	8.887	1.13	-1.039	5.847	-1.98	4.533	4.435	-1.987	5.7e-05	0	0.017184	0.009331	0.000351	0.006412	142
RNF2	-0.75	-4.639	-1.923	-0.361	1.423	-2.092	-0.433	-3.038	4.654	7.361	0.594	-0.554	3.889	-1.562	3.515	2.605	-2.707	0.002469	2e-06	0.054271	0.040673	0.049389	0.000459	196
CIITA	4.883	-2.671	4.966	2.196	1.386	-4.226	0.159	-5.18	-2.687	-3.317	1.741	-2.64	7.554	2.77	5.612	5.339	0.63	0.000169	0	1e-05	0.002204	0.00047	0.028914	5
INTS3	0.371	-3.849	-4.181	-0.373	1.378	-2.083	-4.474	-5.303	6.285	10.903	-0.124	-0.141	4.22	-3.808	3.461	0.829	-4.618	0.000136	2e-06	3.2e-05	0.049071	0.260282	0	16
MLLT6	-0.023	-7.331	2.043	2.524	1.374	-4.493	-1.125	-4.725	4.211	6.959	1.296	-1.413	7.308	-0.481	5.867	3.6	-2.748	7.7e-05	0	0.430045	0.002273	0.009835	0.000852	1
AGO1	1.145	-4.043	-1.568	-0.282	1.247	-3.016	-3.73	-3.785	4.336	8.319	0.286	-0.562	5.189	-1.286	4.263	0.055	-3.983	0.000595	0	0.095386	0.021824	0.396937	5e-06	15
PRPF4	-0.488	-6.729	-0.725	0.964	1.203	-4.136	-2.998	-4.559	5.919	10.454	0.582	-0.801	6.241	-1.689	5.338	1.562	-4.535	3.8e-05	0	0.084572	0.003702	0.156503	0	6
NFKB2	3.459	-3.219	-0.283	-3.116	1.177	-5.469	-2.337	-5.682	4.89	6.924	1.381	-2.113	6.678	2.833	6.646	3.345	-2.034	1.8e-05	0	0.022206	0.000183	0.004174	0.002816	40
SUPT6H	1.647	-5.953	-0.295	1.489	1.144	-3.625	-4.434	-5.478	4.374	9.659	0.487	-0.781	7.6	-1.784	4.769	1.043	-5.285	2e-06	0	0.08397	0.00918	0.239528	0	22
XRN2	2.125	-5.018	-0.159	1.722	1.144	-3.029	-3.838	-6.106	4.236	7.973	0.702	-0.891	7.143	-1.881	4.173	2.268	-3.737	4.3e-05	0	0.092462	0.022546	0.067783	5.6e-05	16
AFF1	-1.727	-5.305	-2.825	0.92	1.091	-2.52	-2.588	-4.16	6.399	10.82	0.07	-0.049	3.578	-3.744	3.611	1.572	-4.421	0.00029	1.8e-05	0.00021	0.045122	0.150413	0	56
DLX5	0.107	-5.197	-1.4	-0.01	1.051	-3.112	-1.177	-4.227	5.172	8.454	0.751	-0.818	5.304	-1.39	4.164	3.05	-3.282	0.000283	0	0.102453	0.021761	0.016867	8.2e-05	4
MEF2B	0.384	-3.606	-1.051	-0.596	0.94	-2.623	-1.71	-3.801	4.146	6.923	0.542	-0.741	3.991	-0.455	3.563	2.091	-2.777	0.006074	1e-05	0.307973	0.045122	0.089751	0.000634	22
FIP1L1	0.081	-5.084	-1.559	0.633	0.883	-3.186	-4.103	-3.791	5.01	10.261	0.062	-0.233	5.165	-2.192	4.069	-0.312	-5.252	0.000115	0	0.022935	0.030452	0.446211	0	14
AHR	0.545	-5.954	-1.227	0.248	0.794	-3.926	-1.611	-4.856	5.632	9.687	0.826	-0.96	6.499	-1.475	4.72	3.244	-4.055	1.7e-05	0	0.097591	0.009906	0.010362	1e-06	73
LEO1	0.714	-7.368	0.095	1.535	0.753	-4.466	-3.79	-5.363	6.261	10.483	0.806	-1.036	8.081	-1.441	5.219	1.573	-4.222	2e-06	0	0.183112	0.006489	0.137812	2e-06	30
STAT5B	0.707	-6.357	1.439	-0.453	0.712	-5.522	0.805	-3.124	4.34	6.803	1.601	-1.731	7.064	1.891	6.234	3.929	-2.463	1e-05	0	0.043884	0.000566	0.001443	0.003473	23
REL	2.614	-7.238	0.878	0.967	0.59	-6.617	-4.133	-7.085	6.56	11.233	1.302	-1.748	9.852	-0.088	7.207	2.951	-4.673	0	0	0.440147	0.000118	0.012329	0	11
STAT2	2.795	-5.129	0.779	0.609	0.586	-5.058	-1.639	-6.005	4.851	6.799	1.474	-1.757	7.925	0.17	5.644	4.366	-1.949	5e-06	0	0.407486	0.003007	0.000265	0.010165	92
SREBF1	0.603	-5.1	-2.185	-1.666	0.486	-3.725	-0.71	-3.205	5.586	8.976	0.756	-0.944	5.703	-0.519	4.21	2.494	-3.391	0.000399	0	0.186624	0.029325	0.045512	4e-05	20
PCF11	1.145	-4.298	0.344	0.345	0.461	-3.598	-1.883	-2.939	3.208	6.029	0.655	-0.892	5.443	-0.001	4.059	1.056	-2.822	0.001957	0	0.480003	0.04525	0.268905	0.001122	9
SRSF4	1.208	-3.772	0.186	-0.809	0.331	-3.696	-1.495	-2.726	3.373	6.261	0.721	-0.949	4.981	0.995	4.027	1.231	-2.888	0.00309	0	0.266732	0.041552	0.245321	0.001068	4
IRF1	3.754	-4.89	3.731	1.566	0.046	-4.728	-1.291	-6.312	2.575	4.303	1.763	-2.012	8.644	2.166	4.774	5.02	-1.728	1e-06	0	0.005668	0.013485	5.9e-05	0.027658	55
HSF2	-1.143	-4.992	0.565	0.882	-0.61	-4.913	1.516	-1.282	4.011	5.455	0.868	-0.97	3.849	-0.317	4.303	2.799	-1.444	0.006896	1e-06	0.484187	0.025738	0.065306	0.018734	26
KDM5A	-1.419	-0.31	-5.141	3.992	-0.807	4.534	-9.795	-3.845	1.615	11.653	-3.109	3.205	-1.109	-9.134	-5.34	-5.95	-10.038	0	0.191291	0	0.004275	0.000375	0	15
SIN3B	-1.688	0.199	-3.555	4.131	-1.134	4.356	-8.103	-2.006	-0.303	8.853	-2.957	3.107	-1.887	-7.686	-5.49	-6.096	-9.156	0	0.042894	0	0.002671	0.0001	0	6
KANSL1	-1.794	0.931	-2.477	3.47	-1.636	3.833	-5.207	-0.662	-1.11	5.303	-2.445	2.575	-2.725	-5.947	-5.469	-4.545	-6.413	2e-05	0.003306	0	0.00199	0.003431	0	4
CHAMP1	-2.11	-1.332	-1.689	2.98	-1.759	1.649	-3.954	-0.383	0.635	6.436	-1.776	1.87	-0.778	-4.669	-3.409	-3.57	-5.801	0.000472	0.305185	7.4e-05	0.043849	0.025058	0	4
ZNF518A	-1.336	-0.534	-2.005	3.466	-1.778	2.113	-5.331	-1.198	0.132	6.785	-2.064	2.126	-0.802	-5.471	-3.891	-4.132	-6.653	4.9e-05	0.293677	1e-06	0.02665	0.009835	0	2
ZNF619	-1.005	-0.322	-2.865	3.903	-1.927	1.865	-6.327	-2.915	1.26	8.111	-2.173	2.128	-0.683	-6.769	-3.792	-3.412	-6.851	2.7e-05	0.304237	0	0.025738	0.078494	0	2
ZZZ3	-1.998	-2.174	-0.549	5.835	-2.103	2.198	-6.89	-1.5	-0.254	8.2	-2.359	2.512	0.176	-6.383	-4.302	-5.39	-8.454	3e-06	0.385841	1e-06	0.011882	0.000546	0	8
ZNF33A	-1.492	-1.195	-0.91	3.566	-2.145	1.22	-4.617	-1.24	0.108	6.521	-1.811	1.774	-0.298	-4.476	-3.364	-3.377	-6.413	0.000255	0.463858	6.1e-05	0.039891	0.05106	0	2
ZNF296	-0.516	-1.003	-2.303	3.83	-2.289	1.041	-5.624	-2.518	1.374	7.569	-1.872	1.784	0.487	-6.133	-3.331	-3.106	-6.196	7.8e-05	0.335174	0	0.040796	0.102152	0	2
ZNF224	-0.784	-0.872	-2.635	3.734	-2.328	1.272	-6.198	-2.47	1.43	8.311	-2.103	1.995	0.088	-6.369	-3.6	-3.728	-6.88	2.5e-05	0.451883	0	0.027516	0.045512	0	2
MCRS1	-2.783	0.483	-3.962	2.492	-2.358	3.019	-5.444	-0.293	1.04	7.46	-2.702	2.632	-3.266	-6.454	-5.378	-5.151	-6.42	1e-06	0.000374	0	0.001514	0.000661	0	6
ZNF44	-2.028	-0.888	-2.006	3.978	-2.384	1.788	-4.74	-0.897	0.567	6.776	-2.118	2.151	-1.14	-5.984	-4.173	-3.843	-6.209	4.7e-05	0.178505	1e-06	0.012174	0.020521	0	2
DIDO1	-1.679	-0.138	-1.161	3.962	-2.388	2.747	-4.852	-0.301	-1.111	5.471	-2.238	2.348	-1.541	-5.122	-5.135	-4.551	-6.581	6.9e-05	0.09901	3.5e-05	0.002908	0.002636	0	2
FOXJ3	-1.594	-1.966	-2.567	3.067	-2.42	1.177	-3.845	-1.298	1.726	8.041	-1.74	1.804	0.372	-5.634	-3.598	-2.547	-6.315	7.1e-05	0.316842	1e-06	0.022782	0.123746	0	8
ZNF786	-0.814	0.152	-1.213	3.233	-2.5	0.83	-4.553	-1.209	-0.163	5.654	-1.849	1.732	-0.965	-4.446	-3.331	-3.344	-5.817	0.000598	0.226595	0.000182	0.036921	0.053019	0	2
ZNF781	-1.009	-1.917	-1.285	4.331	-2.502	0.833	-4.667	-2.298	1.293	7.33	-1.634	1.656	0.908	-5.616	-3.335	-2.369	-6.037	0.000124	0.175241	3e-06	0.037286	0.189974	0	4
JRK	-0.679	-1.112	-1.386	4.561	-2.786	1.235	-5.523	-2.339	0.583	6.997	-1.958	1.869	0.433	-5.947	-4.022	-3.185	-6.414	5.7e-05	0.343824	0	0.012174	0.09236	0	2
NFRKB	-2.247	-2.738	-0.862	6.889	-2.905	1.834	-7.152	-2.27	-0.095	10.017	-2.652	2.747	0.491	-7.751	-4.739	-4.882	-10.112	0	0.269828	0	0.004866	0.005585	0	10
CHCHD3	-0.9	-1.302	1.721	3.063	-3.113	-0.181	-0.89	1.8	-1.729	1.262	-0.982	0.929	0.402	-1.342	-2.932	-2.69	-2.991	0.064067	0.327939	0.396157	0.025713	0.083781	0.003857	2
ZNF615	-1.177	-0.744	-0.68	4.704	-3.343	1.087	-4.624	-1.043	-0.194	5.731	-2.004	1.947	-0.433	-5.385	-4.429	-3.581	-5.925	0.000116	0.388033	4e-06	0.004648	0.040596	0	2
