# Supplementary material
Source: Research Square preprint supplement (doi:10.21203/rs.3.rs-9652440/v1)
Supplement: Supplementary file 7 [file bf8facd9ad86806e0274c7b3.xlsx]

## Sheet: Sheet1
Supplementary Table 1. Clinical information of RA and OA patients for synovial tissue samples included in this study. Anti-citrullinated protein/peptide antibody (ACPA), Biological disease-modifying antirheumatic drug (bDMARD), C-reactive protein (CRP), Conventional synthetic disease-modifying antirheumatic drug (csDMARD), Rheumatoid factor (RF).
Clinical data	RA	OA
Number (M/F)	8 (3/5)	3 (0/3)
Age mean (range)	77.6 (71-84)	69.3 (57-79)
ACPA (+/-)	(5/3)	(0/3)
RF (+/-)	(6/2)	(0/3)
CRP (mg/dl), mean ± SD	2.6 ± 2.3	-
Disease duration (years), mean ± SD	9.3 ± 9.8	-
Medication	csDMARD (7), bDMARD (5)	-
