# Supplementary material
Source: Research Square preprint supplement (doi:10.21203/rs.3.rs-9652440/v1)
Supplement: Supplementary file 8 [file d0cd4ed80f7501f8180f3d46.xlsx]

## Sheet: RNA-seq 4mix vs Veh
Gene ID	Gene Symbol	Type	siCtrl_Veh Average Read Count	siCtrol_4mix Average Read Count	log2 (siCtrol_4mix / siCtrl_Veh)	Pvalue(siCtrol_4mix / siCtrl_Veh)	Qvalue (siCtrol_4mix / siCtrl_Veh)
730249	ACOD1	mRNA	0.17	329.25	10.8877	2.69509e-11	6.80532e-10
10537	UBD	mRNA	4.81	7198.31	10.5476	3.08673e-28	3.69799e-26
4283	CXCL9	mRNA	28.53	42583	10.5438	4.60915e-35	9.22562e-33
7472	WNT2	mRNA	0.63	928.74	10.5244	5.85072e-23	4.84989e-21
152816	ODAPH	mRNA	0.34	334.23	9.94719	1.09279e-15	4.91397e-14
165904	XIRP1	mRNA	2.52	2426.17	9.90907	2.94131e-54	1.60919e-51
721	C4B	mRNA	0.17	128.1	9.52673	1.09885e-11	2.94695e-10
115362	GBP5	mRNA	106.19	71701.1	9.39926	9.80352e-104	1.46277e-100
388646	GBP7	mRNA	0.17	101.78	9.19527	8.4442e-13	2.66016e-11
374946	DRAXIN	mRNA	4.42	2430.33	9.10393	3.68089e-65	2.74611e-62
6582	SLC22A2	mRNA	1.26	572.22	8.82418	1.9384e-26	2.07941e-24
163782	KANK4	mRNA	0.34	147.65	8.76843	1.61041e-12	4.8767e-11
6373	CXCL11	mRNA	66.85	27634.5	8.69132	5.76567e-126	1.1829e-122
56833	SLAMF8	mRNA	5.68	2266.06	8.64101	2.04644e-99	2.79902e-96
3627	CXCL10	mRNA	158.11	42571.7	8.07282	1.65029e-133	4.51436e-130
3937	LCP2	mRNA	0.63	161.68	8.0024	1.01806e-13	3.61677e-12
3702	ITK	mRNA	0.34	85.96	7.98858	1.5749e-10	3.60011e-09
23562	CLDN14	mRNA	2.52	581.3	7.84775	1.48018e-33	2.61228e-31
57823	SLAMF7	mRNA	2.25	515.37	7.84101	1.51338e-10	3.46915e-09
260436	FDCSP	mRNA	0.94	199.34	7.72126	4.17344e-17	2.12729e-15
3589	IL11	mRNA	32.19	6695.35	7.70052	5.78761e-10	1.22412e-08
4843	NOS2	mRNA	2.51	505.8	7.65198	2.67476e-25	2.6933e-23
3620	IDO1	mRNA	241.48	45465.3	7.55669	5.78994e-176	2.37576e-172
401138	AMTN	mRNA	2.52	466.77	7.53193	8.09849e-36	1.79622e-33
864	RUNX3	mRNA	0.63	114.66	7.49954	5.92976e-10	1.25258e-08
56159	TEX11	mRNA	0.17	26.2	7.24571	7.4375e-07	9.21296e-06
1300	COL10A1	mRNA	1.26	190.66	7.23829	6.42248e-17	3.22362e-15
6752	SSTR2	mRNA	4.99	751.39	7.23385	1.18358e-37	2.98863e-35
29126	CD274	mRNA	51.03	7636.99	7.22565	8.08128e-76	6.6319e-73
4973	OLR1	mRNA	0.17	25.4	7.19974	7.47546e-06	7.3426e-05
55107	ANO1	mRNA	0.17	24.61	7.15391	8.70246e-07	1.06433e-05
29951	PDZRN4	mRNA	0.17	23.75	7.10278	1.21523e-05	0.000113975
11249	NXPH2	mRNA	0.17	21.88	6.98703	9.99087e-07	1.20397e-05
163351	GBP6	mRNA	0.34	42.84	6.98334	1.82652e-07	2.53627e-06
5155	PDGFB	mRNA	0.17	21.49	6.96121	3.76666e-06	3.98852e-05
3394	IRF8	mRNA	0.17	21.19	6.94105	1.06829e-06	1.27985e-05
1404	HAPLN1	mRNA	0.34	37.44	6.78859	8.87268e-07	1.08354e-05
3694	ITGB6	mRNA	0.63	67.85	6.74847	6.50643e-09	1.1972e-07
91828	EXOC3L4	mRNA	0.34	34.61	6.67522	9.48462e-07	1.14971e-05
347902	AMIGO2	mRNA	16.48	1645	6.6414	3.16804e-12	9.21933e-11
5317	PKP1	mRNA	1.89	187.43	6.62862	1.42801e-21	1.05576e-19
140767	NRSN1	mRNA	0.17	16.89	6.61788	8.77863e-06	8.5307e-05
115361	GBP4	mRNA	225.11	20904.5	6.53703	0	0
431707	LHX8	mRNA	0.34	31.03	6.51756	1.33071e-06	1.55766e-05
203447	NRK	mRNA	9.87	866.97	6.45719	7.08444e-36	1.59283e-33
131368	ZPLD1	mRNA	0.63	54.87	6.44584	1.10629e-08	1.95033e-07
2633	GBP1	mRNA	1315.13	114468	6.4436	2.58661e-133	6.06485e-130
8710	SERPINB7	mRNA	7.75	656.04	6.40287	1.1798e-09	2.38474e-08
80320	SP6	mRNA	7.29	607.26	6.37931	3.80953e-29	4.88484e-27
83953	FCAMR	mRNA	0.34	27.84	6.36189	6.61669e-05	0.000522617
430	ASCL2	mRNA	5.68	465.7	6.35814	4.33392e-30	5.97754e-28
84620	ST6GAL2	mRNA	0.64	52.04	6.35435	3.93894e-06	4.14156e-05
93649	MYOCD	mRNA	1.27	102.2	6.33548	2.6889e-14	1.03356e-12
9308	CD83	mRNA	31.18	2394.54	6.26302	9.38657e-187	7.70308e-183
753	LDLRAD4	mRNA	9.21	698.23	6.24465	3.37091e-27	3.81563e-25
1134	CHRNA1	mRNA	0.63	47.57	6.2415	3.81101e-08	6.14441e-07
80832	APOL4	mRNA	31.5	2286.57	6.18156	8.95563e-14	3.20936e-12
6376	CX3CL1	mRNA	1.58	112.05	6.15229	3.99419e-10	8.66006e-09
728113	ANXA8L1	mRNA	0.17	11.99	6.12938	0.000149881	0.00106632
9235	IL32	mRNA	224.77	15650.2	6.12157	8.34647e-84	8.56191e-81
64386	MMP25	mRNA	1.25	85.56	6.09584	1.98096e-12	5.91154e-11
5350	PLN	mRNA	0.17	11.35	6.0504	0.000206389	0.00141735
6355	CCL8	mRNA	214.23	14191.4	6.04971	1.70442e-51	8.74207e-49
145864	HAPLN3	mRNA	57.17	3768.32	6.04254	1.17688e-181	6.4387e-178
3055	HCK	mRNA	39.98	2575.12	6.00937	8.93633e-33	1.49665e-30
120939	TMEM52B	mRNA	0.17	10.93	5.99551	0.00225813	0.0113238
51339	DACT1	mRNA	67.67	4301.85	5.9904	1.44244e-125	2.63052e-122
23037	PDZD2	mRNA	3.8	228.78	5.91079	1.33642e-24	1.29027e-22
93082	NEURL3	mRNA	0.94	55.44	5.87691	3.59679e-08	5.85076e-07
56670	SUCNR1	mRNA	0.17	9.97	5.86648	0.000273562	0.00181194
1824	DSC2	mRNA	1.89	108.53	5.8463	2.71782e-09	5.24796e-08
1600	DAB1	mRNA	0.94	52.8	5.81636	6.65819e-07	8.32299e-06
5414	SEPTIN4	mRNA	0.95	53.07	5.81127	3.48382e-09	6.62571e-08
9388	LIPG	mRNA	59.68	3329.21	5.80183	3.23567e-06	3.48015e-05
10100	TSPAN2	mRNA	27.05	1490.94	5.78467	3.23203e-27	3.68384e-25
3872	KRT17	mRNA	5.05	277.21	5.77914	3.54992e-15	1.49397e-13
55765	INAVA	mRNA	0.17	9.28	5.76455	0.000482346	0.00297064
30009	TBX21	mRNA	0.34	17.87	5.72292	0.00011122	0.000822279
4188	MDFI	mRNA	0.34	17.07	5.6576	0.000383649	0.00243027
963	CD53	mRNA	0.17	8.58	5.65362	0.00115321	0.00633455
27289	RND1	mRNA	0.17	8.56	5.65055	0.00100881	0.005653
1364	CLDN4	mRNA	22.27	1113.48	5.64384	1.07747e-39	3.06008e-37
732	C8B	mRNA	0.17	8.44	5.63181	0.00307862	0.0147016
6318	SERPINB4	mRNA	6.48	312.49	5.59096	8.7975e-05	0.000665101
7226	TRPM2	mRNA	0.17	8.19	5.58856	0.00220193	0.0110894
79370	BCL2L14	mRNA	0.17	7.99	5.55066	0.00246052	0.012186
1136	CHRNA3	mRNA	2.21	102.68	5.53971	1.13817e-13	4.00989e-12
149647	FAM71A	mRNA	0.17	7.64	5.48767	0.00269291	0.0131427
2982	GUCY1A1	mRNA	0.17	7.54	5.47051	0.00157159	0.00828605
327657	SERPINA9	mRNA	57.53	2537.03	5.46261	2.68704e-10	5.94372e-09
445372	TRIM6-TRIM34	mRNA	0.17	7.39	5.44096	0.0670807	0.180402
4739	NEDD9	mRNA	16.18	664.71	5.36069	1.87684e-29	2.46436e-27
10675	CSPG5	mRNA	3.79	155.53	5.35997	1.95266e-15	8.41183e-14
389336	C5orf46	mRNA	2.21	89.53	5.33985	2.21461e-11	5.64417e-10
9674	KIAA0040	mRNA	2.52	102.05	5.33915	1.10152e-16	5.44557e-15
121793	TEX29	mRNA	0.17	6.84	5.33294	0.00254156	0.0125081
10148	EBI3	mRNA	3.16	126.17	5.31933	6.82277e-21	4.86879e-19
50507	NOX4	mRNA	8.52	337.95	5.31008	2.36491e-18	1.38133e-16
3117	HLA-DQA1	mRNA	18.1	717.35	5.30883	2.70282e-34	5.21899e-32
152330	CNTN4	mRNA	0.17	6.53	5.26754	0.00444061	0.0201214
85443	DCLK3	mRNA	10.16	387.88	5.25511	4.82093e-15	2.00319e-13
5458	POU4F2	mRNA	0.17	6.22	5.19758	0.00809421	0.0333209
494470	RNF165	mRNA	0.95	33.87	5.14909	0.000823436	0.00472719
6354	CCL7	mRNA	271.18	9615.82	5.1481	1.23799e-135	4.06383e-132
55509	BATF3	mRNA	5.29	183.3	5.11595	4.51355e-17	2.29353e-15
27445	PCLO	mRNA	1.58	54.7	5.11424	4.34157e-10	9.35146e-09
4319	MMP10	mRNA	26.89	921.87	5.09935	3.02499e-31	4.64011e-29
26499	PLEK2	mRNA	4.43	148.72	5.06883	1.77442e-19	1.12882e-17
2978	GUCA1A	mRNA	0.34	11.29	5.06077	0.00113214	0.00623229
114108587	ATF7-NPFF	mRNA	0.17	5.59	5.0485	0.108382	0.261368
407977	TNFSF12-TNFSF13	mRNA	0.17	5.53	5.03373	0.0380459	0.116697
200931	SLC51A	mRNA	0.17	5.49	5.02363	0.0087971	0.0357269
6658	SOX3	mRNA	0.17	5.48	5.02102	0.0162671	0.059292
100529257	SYNJ2BP-COX16	mRNA	0.17	5.47	5.01795	0.00887116	0.0359601
133396	IL31RA	mRNA	14.81	478.82	5.01469	1.3501e-42	5.03616e-40
2307	FOXS1	mRNA	0.17	5.43	5.00894	0.00771605	0.0319403
164153	UBL4B	mRNA	0.34	10.87	5.00816	0.00129104	0.00699349
441168	CALHM6	mRNA	17.15	533.49	4.95913	1.35085e-31	2.15257e-29
4496	MT1H	mRNA	3.81	118.44	4.9568	0.0204402	0.0714102
222865	TMEM130	mRNA	0.34	10.4	4.9444	0.00213317	0.0107946
3386	ICAM4	mRNA	0.94	29.06	4.94263	2.83292e-06	3.08129e-05
50506	DUOX2	mRNA	0.17	5.18	4.94178	0.0452176	0.133818
221393	ADGRF4	mRNA	1.26	38.35	4.93185	5.90969e-07	7.45127e-06
57158	JPH2	mRNA	10.08	306	4.9245	2.56288e-38	6.67692e-36
4036	LRP2	mRNA	0.34	10.15	4.90861	0.00191961	0.00985197
10218	ANGPTL7	mRNA	0.17	5	4.8956	0.0493202	0.143182
79605	PGBD5	mRNA	20.06	594.82	4.88999	1.31925e-23	1.16413e-21
124739	USP43	mRNA	3.17	93.05	4.87428	6.73112e-12	1.85677e-10
8447	DOC2B	mRNA	0.34	9.85	4.86404	0.00235292	0.0117417
200403	VWA3B	mRNA	0.62	17.95	4.84678	0.000217884	0.00148696
2701	GJA4	mRNA	0.17	4.82	4.8413	0.0534282	0.1519
199920	FYB2	mRNA	0.17	4.78	4.82838	0.0167275	0.0606736
731	C8A	mRNA	0.17	4.71	4.80978	0.0181429	0.0646925
5004	ORM1	mRNA	0.34	9.15	4.76006	0.00947198	0.0379316
5502	PPP1R1A	mRNA	1.25	33.85	4.7568	5.24739e-05	0.000427421
132946	ARL9	mRNA	1.9	50.77	4.74284	1.05932e-09	2.1518e-08
90865	IL33	mRNA	232.48	6221.45	4.74207	8.86168e-08	1.30329e-06
8651	SOCS1	mRNA	19.25	515.01	4.74131	8.50301e-49	4.1047e-46
4495	MT1G	mRNA	32.69	857.81	4.71379	0.000197871	0.00136686
64005	MYO1G	mRNA	1.58	41.19	4.70506	1.12342e-08	1.97627e-07
27164	SALL3	mRNA	0.17	4.36	4.70252	0.0212813	0.0736073
1745	DLX1	mRNA	0.63	16.48	4.70203	0.000290662	0.00190292
9507	ADAMTS4	mRNA	264.58	6833.73	4.69092	3.86053e-08	6.21204e-07
653145	ANXA8	mRNA	0.34	8.72	4.68986	0.00325789	0.0154364
65987	KCTD14	mRNA	5.64	142.51	4.65833	1.04823e-16	5.19778e-15
27063	ANKRD1	mRNA	8.17	199.65	4.61083	3.41733e-23	2.95204e-21
389903	CSAG3	mRNA	0.17	4.08	4.60877	0.0297321	0.0961563
645191	LINGO3	mRNA	0.17	4.08	4.60868	0.0820514	0.21072
6343	SCT	mRNA	0.17	4.08	4.60866	0.0791288	0.204655
340596	LHFPL1	mRNA	0.17	4.02	4.58913	0.0270432	0.0891823
1906	EDN1	mRNA	19.93	478.86	4.58678	5.45685e-21	3.91106e-19
57611	ISLR2	mRNA	0.94	22.07	4.54918	5.69553e-05	0.000458239
3736	KCNA1	mRNA	9.43	220.37	4.54645	2.22972e-18	1.30701e-16
5918	RARRES1	mRNA	74.54	1718.13	4.52677	4.6044e-89	5.398e-86
5079	PAX5	mRNA	0.34	7.76	4.52032	0.00757672	0.0314827
10068	IL18BP	mRNA	116.99	2683.96	4.51991	3.44722e-29	4.45506e-27
6581	SLC22A3	mRNA	126.54	2868.74	4.5028	8.08948e-10	1.6877e-08
3061	HCRTR1	mRNA	0.17	3.75	4.49043	0.0501537	0.144925
5340	PLG	mRNA	0.17	3.74	4.48746	0.0414815	0.124901
1233	CCR4	mRNA	0.17	3.7	4.47498	0.0364274	0.112702
8676	STX11	mRNA	13.55	301.2	4.47415	7.28123e-26	7.51616e-24
1080	CFTR	mRNA	0.17	3.69	4.47223	0.0335885	0.10557
100133941	CD24	mRNA	30	665.59	4.47159	1.02214e-06	1.22904e-05
92241	RCSD1	mRNA	8.51	186.21	4.45218	3.58014e-23	3.04461e-21
153	ADRB1	mRNA	0.34	7.07	4.38613	0.0115423	0.0447363
3601	IL15RA	mRNA	370.18	7728.7	4.38392	6.96328e-57	4.2329e-54
7453	WARS1	mRNA	4348.11	90703.7	4.3827	1.33498e-59	8.7644e-57
100293534	C4B_2	mRNA	8.31	172.71	4.37659	0.00113249	0.00623229
1592	CYP26A1	mRNA	0.17	3.38	4.34892	0.0558645	0.157085
55340	GIMAP5	mRNA	0.17	3.36	4.33985	0.0630774	0.172261
169355	IDO2	mRNA	0.17	3.34	4.33521	0.045863	0.135362
92421	CHMP4C	mRNA	0.17	3.34	4.33521	0.045863	0.135362
107986217	LOC107986217	mRNA	0.17	3.34	4.33444	0.0481555	0.140618
56937	PMEPA1	mRNA	196.31	3952.81	4.33167	4.23092e-24	3.90124e-22
84648	LCE3D	mRNA	0.17	3.33	4.33143	0.0461095	0.135943
1490	CCN2	mRNA	546.22	10847.9	4.31179	5.47441e-34	1.03278e-31
7185	TRAF1	mRNA	177.27	3500.87	4.30367	6.85286e-08	1.04144e-06
92369	SPSB4	mRNA	4.37	83.77	4.25937	1.26971e-09	2.54765e-08
65997	RASL11B	mRNA	0.96	18.2	4.25054	0.000424495	0.00265197
53831	GPR84	mRNA	21.41	405.85	4.24465	1.35771e-33	2.42219e-31
347252	IGFBPL1	mRNA	1.26	23.7	4.23641	2.88793e-05	0.000249078
3659	IRF1	mRNA	1116	20891.9	4.22653	2.61705e-82	2.38631e-79
5570	PKIB	mRNA	0.34	6.26	4.21749	0.013046	0.0492354
80833	APOL3	mRNA	765.01	14072.9	4.2013	3.71747e-83	3.58911e-80
3458	IFNG	mRNA	0.17	3.03	4.19968	0.136798	0.310487
124460	SNX20	mRNA	0.17	3.02	4.19386	0.067723	0.181713
26219	OR1J4	mRNA	0.17	3.02	4.19386	0.067723	0.181713
347475	CCDC160	mRNA	0.16	3	4.18629	0.0644999	0.175039
1370	CPN2	mRNA	1.89	34.22	4.17685	6.07638e-06	6.10353e-05
338442	HCAR2	mRNA	0.16	2.98	4.17675	0.147735	0.328249
51513	ETV7	mRNA	82.22	1481.77	4.1717	5.10059e-41	1.69276e-38
84634	KISS1R	mRNA	0.34	6.02	4.15506	0.0271291	0.0894117
634	CEACAM1	mRNA	0.95	16.86	4.1536	0.000277795	0.0018311
653641	GOLGA6C	mRNA	0.34	5.94	4.1395	0.0537957	0.152712
51267	CLEC1A	mRNA	0.34	5.92	4.13294	0.0168378	0.0609796
51365	PLA1A	mRNA	7.19	125.9	4.1298	9.40183e-10	1.9217e-08
144100	PLEKHA7	mRNA	3.46	60.58	4.12889	1.31748e-06	1.54676e-05
27253	PCDH17	mRNA	2.52	44.05	4.12864	8.891e-09	1.59659e-07
3383	ICAM1	mRNA	3983.22	69248.5	4.11977	5.15676e-41	1.69276e-38
342510	CD300E	mRNA	7.9	133.38	4.07695	2.12417e-15	9.10289e-14
152404	IGSF11	mRNA	0.64	10.69	4.07068	0.00740767	0.0308898
3587	IL10RA	mRNA	4.11	68.62	4.0626	3.12347e-10	6.87206e-09
7087	ICAM5	mRNA	0.34	5.6	4.05185	0.0220315	0.0757424
85407	NKD1	mRNA	1.58	26.13	4.04913	1.16048e-05	0.000109465
774	CACNA1B	mRNA	0.16	2.68	4.03145	0.167338	0.359163
10878	CFHR3	mRNA	0.16	2.68	4.02977	0.0989308	0.244063
4499	MT1M	mRNA	99.24	1608.2	4.01842	2.67114e-07	3.59356e-06
147381	CBLN2	mRNA	0.16	2.65	4.0174	0.0864299	0.219628
26279	PLA2G2D	mRNA	0.16	2.65	4.01465	0.112317	0.268294
80303	EFHD1	mRNA	0.64	10.26	4.00561	0.0086881	0.0353928
3119	HLA-DQB1	mRNA	16.62	265.89	4.00013	8.50477e-09	1.53226e-07
4489	MT1A	mRNA	3.16	50.33	3.99388	1.22736e-06	1.45239e-05
10507	SEMA4D	mRNA	73.23	1157.02	3.98178	1.08137e-39	3.06008e-37
91523	PCED1B	mRNA	3.17	49.96	3.98025	4.02692e-07	5.22894e-06
6352	CCL5	mRNA	670.94	10544.4	3.97415	3.3779e-31	5.13346e-29
8911	CACNA1I	mRNA	0.63	9.87	3.9634	0.00758092	0.0314856
116071	BATF2	mRNA	88.74	1375.63	3.95428	5.32153e-40	1.55968e-37
23138	N4BP3	mRNA	6.36	98.57	3.95337	8.04897e-08	1.1988e-06
3782	KCNN3	mRNA	25.63	389.5	3.92567	4.43302e-12	1.25881e-10
252995	FNDC5	mRNA	3.15	47.65	3.9202	1.18008e-07	1.69159e-06
257106	ARHGAP30	mRNA	2.53	38.2	3.91677	6.41156e-06	6.39325e-05
10125	RASGRP1	mRNA	0.94	14.08	3.90984	0.00160682	0.00845007
53637	S1PR5	mRNA	0.63	9.44	3.90841	0.00581674	0.0252089
26579	MYEOV	mRNA	1.58	23.58	3.90365	6.59046e-05	0.000521297
3985	LIMK2	mRNA	261.35	3906.36	3.90177	1.30667e-112	2.14464e-109
3563	IL3RA	mRNA	3.74	55.06	3.87981	5.7309e-07	7.24105e-06
4804	NGFR	mRNA	0.63	9.18	3.87192	0.00729132	0.0304743
161436	EML5	mRNA	1.59	23.28	3.86959	0.000177463	0.00124209
4225	MEP1B	mRNA	0.34	4.92	3.86362	0.0332545	0.104833
57713	SFMBT2	mRNA	6.35	92.36	3.86341	3.43898e-08	5.60516e-07
4322	MMP13	mRNA	77.21	1119.41	3.85786	8.81019e-05	0.000665624
3039	HBA1	mRNA	0.16	2.36	3.85541	0.323341	0.566382
81494	CFHR5	mRNA	0.16	2.33	3.83918	0.139265	0.314626
155	ADRB3	mRNA	0.16	2.32	3.83652	0.207704	0.419462
6975	TECTB	mRNA	0.16	2.31	3.82936	0.129078	0.297676
1437	CSF2	mRNA	80.74	1145.52	3.82667	1.51253e-16	7.34472e-15
10225	CD96	mRNA	0.16	2.29	3.82074	0.11963	0.281161
389840	MAP3K15	mRNA	0.63	8.86	3.82016	0.010347	0.0407841
3683	ITGAL	mRNA	0.16	2.29	3.81642	0.130999	0.301006
116	ADCYAP1	mRNA	0.16	2.27	3.80988	0.131973	0.302525
3669	ISG20	mRNA	119.61	1670.99	3.80424	1.92936e-06	2.17789e-05
3779	KCNMB1	mRNA	7.29	101.44	3.79785	7.12506e-08	1.07683e-06
64127	NOD2	mRNA	143.29	1992.62	3.79767	2.6287e-07	3.53936e-06
100506736	SLFN12L	mRNA	3.44	47.87	3.79692	1.77031e-07	2.46447e-06
4261	CIITA	mRNA	115.23	1592.1	3.78839	5.85721e-35	1.15825e-32
7477	WNT7B	mRNA	0.34	4.61	3.76866	0.093443	0.233544
493861	EID3	mRNA	7.52	101.85	3.75875	3.74478e-15	1.57194e-13
84072	HORMAD1	mRNA	2.52	34.06	3.75648	8.58371e-07	1.05059e-05
650	BMP2	mRNA	929.68	12537.7	3.7534	2.0557e-41	7.17875e-39
4210	MEFV	mRNA	30.34	409.07	3.75303	1.2566e-11	3.34813e-10
952	CD38	mRNA	181.5	2425.69	3.74035	2.38706e-25	2.41844e-23
1815	DRD4	mRNA	3.47	46.15	3.73163	7.70631e-07	9.51005e-06
169044	COL22A1	mRNA	35.73	473.72	3.72901	1.78977e-12	5.36048e-11
6236	RRAD	mRNA	165.15	2189.16	3.7285	3.90398e-14	1.47301e-12
8743	TNFSF10	mRNA	116.8	1545.09	3.72552	5.81357e-23	4.84356e-21
340665	CYP26C1	mRNA	0.95	12.41	3.70649	0.0150009	0.0553455
245806	VGLL2	mRNA	0.63	8.18	3.69058	0.0262015	0.087142
3755	KCNG1	mRNA	4.79	61.53	3.6847	0.000566604	0.00341272
3174	HNF4G	mRNA	0.64	8.09	3.67073	0.0150718	0.0555356
1379	CR1L	mRNA	2.2	27.99	3.66707	7.99023e-06	7.81547e-05
26059	ERC2	mRNA	2.53	32.11	3.66321	3.2832e-06	3.52434e-05
219736	STOX1	mRNA	0.64	8.07	3.65932	0.0187104	0.0663125
3575	IL7R	mRNA	864.4	10920	3.65913	3.21579e-44	1.35965e-41
2321	FLT1	mRNA	0.34	4.25	3.65222	0.0642132	0.174521
23046	KIF21B	mRNA	0.34	4.19	3.63315	0.0522537	0.149415
256957	HEATR9	mRNA	0.16	1.99	3.62679	0.268116	0.499338
80326	WNT10A	mRNA	0.16	1.99	3.62679	0.268116	0.499338
4916	NTRK3	mRNA	0.34	4.16	3.62518	0.0575818	0.160457
28513	CDH19	mRNA	0.16	1.98	3.62029	0.269526	0.501272
131578	LRRC15	mRNA	1269.88	15549.4	3.61409	7.13836e-34	1.33139e-31
5655	KLK10	mRNA	0.64	7.79	3.61381	0.0172284	0.0620517
107984156	LOC107984156	mRNA	0.16	1.96	3.60591	0.272668	0.505626
64699	TMPRSS3	mRNA	0.16	1.94	3.59798	0.163331	0.353148
11074	TRIM31	mRNA	0.16	1.94	3.59296	0.172475	0.367545
137814	NKX2-6	mRNA	0.16	1.93	3.59169	0.172702	0.367838
80157	CWH43	mRNA	0.16	1.93	3.59169	0.172702	0.367838
283129	MAJIN	mRNA	0.16	1.93	3.58665	0.173615	0.369267
5042	PABPC3	mRNA	0.16	1.92	3.58018	0.185715	0.388002
4824	NKX3-1	mRNA	123.27	1473.16	3.57903	1.42052e-88	1.55433e-85
23007	PLCH1	mRNA	25.06	297.88	3.57122	7.98765e-14	2.89407e-12
9022	CLIC3	mRNA	31.78	375.15	3.56119	8.09251e-10	1.6877e-08
155038	GIMAP8	mRNA	5.69	67.05	3.55859	1.41405e-10	3.25052e-09
3624	INHBA	mRNA	632.22	7390.03	3.54709	5.70713e-06	5.77504e-05
84929	FIBCD1	mRNA	3.2	37.27	3.54097	0.000178428	0.00124725
165257	C1QL2	mRNA	0.95	10.97	3.53486	0.00444742	0.0201367
1264	CNN1	mRNA	1.26	14.45	3.52483	0.00213561	0.0108018
3861	KRT14	mRNA	0.34	3.88	3.52188	0.083416	0.213423
4318	MMP9	mRNA	0.34	3.86	3.51306	0.0695983	0.185833
3899	AFF3	mRNA	1.91	21.7	3.50497	0.00120954	0.00661079
9047	SH2D2A	mRNA	11.7	131.12	3.48637	6.41878e-12	1.77658e-10
6876	TAGLN	mRNA	260.22	2889.23	3.47291	4.74776e-16	2.19507e-14
2643	GCH1	mRNA	412.62	4575.89	3.47116	4.52585e-31	6.81494e-29
65268	WNK2	mRNA	0.64	7.07	3.46683	0.031473	0.100441
117195	MRGPRX3	mRNA	6.15	67.6	3.45841	0.00090576	0.00512983
4914	NTRK1	mRNA	4.14	45.03	3.44173	3.98191e-05	0.000332596
1000	CDH2	mRNA	251.78	2734.82	3.44119	1.29393e-41	4.61681e-39
155185	AMZ1	mRNA	27.14	292.09	3.42817	3.40514e-11	8.5196e-10
92162	TMEM88	mRNA	1.59	17.09	3.42739	0.00276213	0.0134206
4494	MT1F	mRNA	67.47	719.82	3.41538	0.000394298	0.00248908
79651	RHBDF2	mRNA	220.26	2347.21	3.41365	1.00641e-30	1.46179e-28
12	SERPINA3	mRNA	6.64	70.53	3.40988	8.34345e-10	1.72461e-08
1137	CHRNA4	mRNA	0.34	3.57	3.40045	0.160944	0.349067
26045	LRRTM2	mRNA	18.62	196.1	3.39706	8.55397e-23	6.98489e-21
10529	NEBL	mRNA	3.78	39.82	3.3955	4.67882e-06	4.82535e-05
8633	UNC5C	mRNA	9.21	96.57	3.39099	2.45557e-05	0.000215756
3680	ITGA9	mRNA	16.57	173.51	3.38831	6.46369e-18	3.63317e-16
4978	OPCML	mRNA	1.28	13.22	3.37117	0.035031	0.10906
339221	ENPP7	mRNA	0.16	1.64	3.36946	0.394652	0.641901
100288797	TMEM239	mRNA	1.86	19.05	3.35747	0.00154837	0.00818732
5132	PDC	mRNA	0.16	1.62	3.35481	0.33165	0.575227
5588	PRKCQ	mRNA	0.16	1.62	3.35481	0.33165	0.575227
127544	RNF19B	mRNA	279.24	2854.89	3.35384	1.15966e-35	2.5378e-33
242	ALOX12B	mRNA	0.16	1.62	3.35009	0.324095	0.567037
25791	NGEF	mRNA	10.16	103.48	3.34849	0.000636636	0.00377633
3898	LAD1	mRNA	0.16	1.61	3.34191	0.229018	0.448766
7161	TP73	mRNA	0.16	1.61	3.34191	0.229018	0.448766
51305	KCNK9	mRNA	0.16	1.6	3.3407	0.326343	0.569695
284076	TTLL6	mRNA	0.63	6.34	3.33993	0.0324875	0.102918
6359	CCL15	mRNA	0.16	1.6	3.33763	0.39927	0.645637
869	CBLN1	mRNA	0.16	1.6	3.33763	0.39927	0.645637
4629	MYH11	mRNA	3.46	34.96	3.3368	4.94676e-06	5.07762e-05
5652	PRSS8	mRNA	0.16	1.6	3.33443	0.230616	0.450929
4688	NCF2	mRNA	7.51	75.64	3.33287	6.35336e-10	1.33861e-08
121551	BTBD11	mRNA	47.83	480.77	3.32934	1.49954e-10	3.44223e-09
10786	SLC17A3	mRNA	0.16	1.59	3.32654	0.329763	0.573205
150084	IGSF5	mRNA	0.16	1.59	3.32654	0.329763	0.573205
171222	UBE2L5	mRNA	0.16	1.59	3.32654	0.329763	0.573205
3071	NCKAP1L	mRNA	0.16	1.59	3.32654	0.329763	0.573205
3352	HTR1D	mRNA	0.16	1.59	3.32654	0.329763	0.573205
643854	CTAGE9	mRNA	0.16	1.58	3.32179	0.330916	0.574439
6779	STATH	mRNA	0.16	1.58	3.32179	0.330916	0.574439
88	ACTN2	mRNA	4.66	46.55	3.32159	4.55987e-05	0.000376465
6692	SPINT1	mRNA	5.06	50.51	3.32028	4.13923e-08	6.58306e-07
1133	CHRM5	mRNA	0.16	1.57	3.31384	0.332844	0.576756
29995	LMCD1	mRNA	245.57	2404.01	3.29126	1.08917e-48	5.1076e-46
10272	FSTL3	mRNA	325.62	3184.7	3.2899	1.46275e-25	1.49119e-23
1294	COL7A1	mRNA	899.18	8738.22	3.28066	0.00334281	0.0157597
467	ATF3	mRNA	371.6	3606.22	3.27867	9.17595e-18	5.088e-16
128653	C20orf141	mRNA	1.56	15.11	3.27647	0.00264435	0.0129441
5920	PLAAT4	mRNA	297.29	2868.78	3.27049	1.37358e-38	3.63622e-36
51056	LAP3	mRNA	2025.04	19498.8	3.26737	2.60967e-74	2.03964e-71
6543	SLC8A2	mRNA	1.58	15.16	3.26624	0.00834646	0.0341367
2634	GBP2	mRNA	1764.56	16972.2	3.26579	1.96737e-53	1.04163e-50
247	ALOX15B	mRNA	1.88	18.05	3.26229	0.00106387	0.00591906
57624	NYAP2	mRNA	0.63	6.01	3.26107	0.0379058	0.116354
84419	C15orf48	mRNA	2366.5	22608.5	3.25604	3.43635e-43	1.37563e-40
1825	DSC3	mRNA	0.96	9.15	3.25566	0.031287	0.10008
340706	VWA2	mRNA	0.63	5.96	3.24355	0.0341187	0.106787
113730	KLHDC7B	mRNA	23.15	219.06	3.24235	3.70979e-06	3.93338e-05
7122	CLDN5	mRNA	0.62	5.91	3.24164	0.0460859	0.135898
27076	LYPD3	mRNA	32.5	305.33	3.23201	0.00551445	0.0241485
1365	CLDN3	mRNA	0.95	8.87	3.22793	0.0176481	0.0632581
27071	DAPP1	mRNA	0.34	3.14	3.22762	0.123262	0.287453
66000	TMEM108	mRNA	0.34	3.16	3.22762	0.122901	0.286774
79937	CNTNAP3	mRNA	0.34	3.16	3.22761	0.122736	0.286513
10268	RAMP3	mRNA	0.95	8.78	3.21498	0.0122268	0.0468532
64321	SOX17	mRNA	2.18	20.19	3.21412	0.00342145	0.0160814
161502	CFAP161	mRNA	0.95	8.8	3.20597	0.0186029	0.0660458
1618	DAZL	mRNA	3.49	32.05	3.19917	0.000132116	0.000958207
118788	PIK3AP1	mRNA	8.48	77.65	3.19533	2.85861e-11	7.19608e-10
135	ADORA2A	mRNA	212.83	1934.38	3.18408	3.74663e-05	0.000315351
152519	NIPAL1	mRNA	1.57	14.22	3.17718	0.00516592	0.0228848
9603	NFE2L3	mRNA	79	711.92	3.17185	7.38158e-33	1.24901e-30
10673	TNFSF13B	mRNA	205.66	1852.66	3.17126	3.85319e-35	7.8077e-33
1071	CETP	mRNA	0.95	8.52	3.16992	0.0181243	0.0646404
3717	JAK2	mRNA	172.55	1545.83	3.16332	8.57049e-34	1.5458e-31
83643	CCDC3	mRNA	12.9	115.29	3.15993	1.02357e-10	2.4034e-09
280664	WFDC10B	mRNA	0.63	5.64	3.15557	0.060606	0.16676
6542	SLC7A2	mRNA	750.91	6604.75	3.13679	0.00362803	0.0169198
80380	PDCD1LG2	mRNA	319.77	2796.14	3.12835	9.56152e-43	3.73651e-40
3673	ITGA2	mRNA	333.7	2916.83	3.12778	2.10275e-19	1.3274e-17
55521	TRIM36	mRNA	12.9	111.43	3.11073	2.09904e-12	6.24121e-11
1807	DPYS	mRNA	0.62	5.32	3.10917	0.0883198	0.223565
100128327	TRAPPC3L	mRNA	0.94	8.09	3.10793	0.0199175	0.0699215
222553	SLC35F1	mRNA	32.06	276.28	3.10732	1.87999e-10	4.22688e-09
162461	TMEM92	mRNA	1.57	13.51	3.1031	0.00739755	0.0308554
5328	PLAU	mRNA	2168.56	18530.3	3.09508	5.32848e-29	6.77957e-27
121268	RHEBL1	mRNA	10.02	85.57	3.09407	1.73033e-09	3.43408e-08
4501	MT1X	mRNA	108.9	919.94	3.07851	0.000392658	0.00248159
23025	UNC13A	mRNA	7.29	61.44	3.07551	0.000107136	0.000795304
3752	KCND3	mRNA	29.75	250.53	3.07387	1.52703e-16	7.39326e-15
117283	IP6K3	mRNA	9.68	81.26	3.07004	0.000314436	0.00203583
644943	RASSF10	mRNA	0.34	2.83	3.06723	0.155745	0.341105
958	CD40	mRNA	254.06	2117.76	3.05932	1.02803e-14	4.1154e-13
6664	SOX11	mRNA	16.58	138.05	3.05753	9.92064e-06	9.52626e-05
168620	BHLHA15	mRNA	9.09	75.38	3.05144	0.00058859	0.00352832
158131	OR1Q1	mRNA	0.16	1.28	3.04706	0.442917	0.687064
23213	SULF1	mRNA	3784.39	31189.9	3.04295	1.25166e-13	4.38964e-12
146395	GSG1L	mRNA	0.16	1.28	3.03895	0.410865	0.656685
64902	AGXT2	mRNA	0.16	1.28	3.03895	0.410865	0.656685
3824	KLRD1	mRNA	5.4	44.19	3.03396	7.55718e-05	0.000583974
2555	GABRA2	mRNA	0.16	1.27	3.03118	0.407244	0.653254
2779	GNAT1	mRNA	0.16	1.27	3.03118	0.407244	0.653254
117289	TAGAP	mRNA	0.16	1.27	3.02927	0.413306	0.658729
387700	SLC16A12	mRNA	0.16	1.27	3.02927	0.413306	0.658729
94137	RP1L1	mRNA	0.16	1.27	3.02927	0.413306	0.658729
3084	NRG1	mRNA	148.6	1212.3	3.02829	5.80189e-27	6.30639e-25
3798	KIF5A	mRNA	4.11	33.55	3.02824	0.000524759	0.00319943
2299	FOXI1	mRNA	0.15	1.26	3.02345	0.414783	0.659609
3784	KCNQ1	mRNA	0.15	1.26	3.02345	0.414783	0.659609
283748	PLA2G4D	mRNA	0.15	1.26	3.02106	0.316312	0.558014
81626	SHCBP1L	mRNA	0.15	1.26	3.02106	0.316312	0.558014
90527	DUOXA1	mRNA	0.15	1.26	3.02106	0.316312	0.558014
440193	CCDC88C	mRNA	0.94	7.65	3.01797	0.0221798	0.076079
3600	IL15	mRNA	53.48	432.42	3.01532	9.04641e-44	3.71197e-41
107181291	PYDC5	mRNA	0.15	1.25	3.01364	0.31815	0.560338
84966	IGSF21	mRNA	0.15	1.25	3.01364	0.31815	0.560338
105180390	SPDYE13	mRNA	0.15	1.25	3.01171	0.412216	0.657837
124535	HSF5	mRNA	0.15	1.25	3.01171	0.412216	0.657837
26038	CHD5	mRNA	0.15	1.25	3.01171	0.412216	0.657837
2915	GRM5	mRNA	0.15	1.25	3.01171	0.412216	0.657837
9437	NCR1	mRNA	0.15	1.25	3.01171	0.412216	0.657837
102724428	SIK1B	mRNA	322.15	2587.33	3.00568	2.89357e-15	1.22403e-13
100533952	RBAK-RBAKDN	mRNA	0.15	1.24	3.00428	0.320468	0.563032
29943	PADI1	mRNA	0.15	1.24	3.00428	0.320468	0.563032
7069	THRSP	mRNA	0.15	1.24	3.00428	0.320468	0.563032
10912	GADD45G	mRNA	16.41	131.5	3.00239	7.04828e-16	3.20453e-14
55203	LGI2	mRNA	102.07	817.84	3.0023	0.000219834	0.00149777
200010	SLC5A9	mRNA	0.15	1.23	2.99393	0.422263	0.666023
259290	TAS2R31	mRNA	0.15	1.22	2.98597	0.42429	0.667613
27033	ZBTB32	mRNA	2.21	17.4	2.97726	0.0119171	0.0459359
90226	UCN2	mRNA	13.66	107.5	2.97649	1.7756e-05	0.000160833
391123	VSIG8	mRNA	0.15	1.21	2.97556	0.454062	0.69826
110384692	LOC110384692	mRNA	127.71	1003.72	2.97446	0.00107945	0.00599155
90161	HS6ST2	mRNA	3.82	29.94	2.97211	0.000199435	0.00137535
1143	CHRNB4	mRNA	0.94	7.37	2.96951	0.0913634	0.22957
129607	CMPK2	mRNA	634.94	4953.25	2.96368	8.2561e-23	6.77537e-21
7168	TPM1	mRNA	1606.97	12411.7	2.94928	2.18368e-36	5.12011e-34
5055	SERPINB2	mRNA	123.12	945.55	2.94106	0.000332521	0.00213774
6096	RORB	mRNA	5.07	38.81	2.93738	6.27658e-06	6.27391e-05
105376714	LOC105376714	mRNA	3.13	23.87	2.93028	0.000876806	0.00498995
2207	FCER1G	mRNA	9.09	68.88	2.92212	5.91286e-08	9.12453e-07
7498	XDH	mRNA	2.86	21.61	2.92041	0.000619898	0.00368504
204962	SLC44A5	mRNA	1.27	9.61	2.92001	0.0739372	0.19432
1301	COL11A1	mRNA	27.85	210.16	2.91596	6.08735e-08	9.37257e-07
10149	ADGRG2	mRNA	11.27	84.4	2.90521	1.60595e-06	1.84068e-05
3955	LFNG	mRNA	15.24	114.16	2.90513	7.92344e-08	1.18225e-06
23780	APOL2	mRNA	1597.22	11925.8	2.90045	5.11334e-48	2.33126e-45
4803	NGF	mRNA	141.84	1057.79	2.89873	2.48558e-13	8.39422e-12
55359	STYK1	mRNA	18.06	134.16	2.89326	8.2791e-08	1.22751e-06
203100	HTRA4	mRNA	1.89	14.01	2.89285	0.00237637	0.0118372
6890	TAP1	mRNA	4206.35	31145.7	2.88839	1.35264e-98	1.70776e-95
81796	SLCO5A1	mRNA	13.32	98.21	2.88249	1.19206e-10	2.7713e-09
2308	FOXO1	mRNA	255.13	1879.9	2.88137	1.32251e-27	1.53945e-25
713	C1QB	mRNA	0.34	2.47	2.87222	0.193224	0.399109
9390	SLC22A13	mRNA	0.34	2.47	2.87222	0.192971	0.39892
65266	WNK4	mRNA	0.63	4.64	2.87112	0.146874	0.326778
338376	IFNE	mRNA	6.06	44.25	2.86933	0.000165231	0.00116442
3038	HAS3	mRNA	42.19	308.2	2.86871	8.10163e-12	2.2162e-10
1436	CSF1R	mRNA	5.35	39.02	2.86587	7.72881e-07	9.51636e-06
3456	IFNB1	mRNA	0.33	2.44	2.86556	0.281773	0.517443
3122	HLA-DRA	mRNA	514.14	3745.29	2.86485	5.26928e-17	2.66107e-15
7039	TGFA	mRNA	54.55	396.66	2.86212	6.50733e-11	1.55692e-09
10642	IGF2BP1	mRNA	7.21	52.4	2.8619	9.3655e-07	1.13779e-05
54979	PLAAT2	mRNA	0.34	2.44	2.85891	0.18299	0.383283
1235	CCR6	mRNA	0.34	2.44	2.85786	0.191961	0.397709
26996	GPR160	mRNA	6.33	45.87	2.85687	1.96203e-06	2.20946e-05
54836	BSPRY	mRNA	0.34	2.43	2.85569	0.283214	0.519199
150372	NFAM1	mRNA	0.34	2.43	2.85382	0.183626	0.384372
972	CD74	mRNA	2053.96	14715.5	2.84086	4.63777e-22	3.57369e-20
285556	C4orf54	mRNA	0.34	2.41	2.839	0.213125	0.426587
6349	CCL3L1	mRNA	5.03	35.89	2.83542	0.216989	0.432528
2769	GNA15	mRNA	1.28	9.12	2.83305	0.0335511	0.10555
125111	GJD3	mRNA	297.44	2116.9	2.83128	1.10062e-19	7.19703e-18
54567	DLL4	mRNA	0.94	6.69	2.82969	0.0859146	0.218623
23533	PIK3R5	mRNA	2.54	17.97	2.82127	0.0118764	0.0458007
2354	FOSB	mRNA	10.11	71.35	2.81891	8.83032e-06	8.56572e-05
3237	HOXD11	mRNA	3.16	22.29	2.81624	0.000721069	0.00422373
23286	WWC1	mRNA	26.26	184.76	2.81472	1.26181e-12	3.89287e-11
1594	CYP27B1	mRNA	5.68	39.77	2.80691	0.000250376	0.00167731
6004	RGS16	mRNA	18.67	129.83	2.79818	2.74885e-13	9.17011e-12
9076	CLDN1	mRNA	57.95	402.43	2.79595	3.79373e-23	3.20961e-21
79092	CARD14	mRNA	2.52	17.52	2.79551	0.0021272	0.0107692
3433	IFIT2	mRNA	1327.68	9205.75	2.79363	1.77454e-17	9.51812e-16
83990	BRIP1	mRNA	25.28	175.14	2.79248	1.41546e-12	4.31819e-11
5143	PDE4C	mRNA	102.94	712.44	2.79092	0.00132178	0.00713863
10848	PPP1R13L	mRNA	164.03	1134.61	2.79014	3.48077e-23	2.99109e-21
1296	COL8A2	mRNA	105.03	720.28	2.77776	1.929e-07	2.66728e-06
10468	FST	mRNA	1039.62	7114.98	2.7748	5.75123e-62	4.10413e-59
5721	PSME2	mRNA	1559.66	10629.4	2.76875	1.80348e-61	1.23335e-58
10446	LRRN2	mRNA	0.62	4.19	2.76655	0.1254	0.291104
11181	TREH	mRNA	0.62	4.18	2.76505	0.133847	0.305497
5366	PMAIP1	mRNA	150.31	1018.97	2.76115	6.36575e-19	3.86046e-17
6374	CXCL5	mRNA	3089.78	20927.2	2.7598	3.29153e-09	6.28184e-08
3553	IL1B	mRNA	103.53	699.27	2.75574	1.30146e-22	1.04199e-20
4602	MYB	mRNA	3.76	25.38	2.75415	0.00054014	0.00327403
100532726	NDUFC2-KCTD14	mRNA	107.59	725.31	2.75309	3.81582e-12	1.093e-10
5699	PSMB10	mRNA	486.95	3281.53	2.75252	1.48328e-31	2.34087e-29
10317	B3GALT5	mRNA	5.08	34.25	2.75233	0.000295837	0.00193107
5031	P2RY6	mRNA	17.55	118.1	2.7502	1.29679e-08	2.25948e-07
114548	NLRP3	mRNA	10.8	72.5	2.74727	0.000883573	0.00501629
4493	MT1E	mRNA	851.71	5715.25	2.74639	3.19846e-10	7.01821e-09
9447	AIM2	mRNA	50.22	332.97	2.72903	2.68346e-08	4.43988e-07
4117	MAK	mRNA	0.63	4.2	2.72852	0.138879	0.314056
51176	LEF1	mRNA	5.38	35.56	2.72427	0.010188	0.0402541
9173	IL1RL1	mRNA	31.55	208.01	2.72098	1.16513e-06	1.38575e-05
6853	SYN1	mRNA	5.39	35.45	2.71724	0.000106773	0.000793328
1440	CSF3	mRNA	553.74	3641.27	2.71716	2.71178e-10	5.99036e-09
6347	CCL2	mRNA	5681.83	37158.9	2.70928	1.41057e-55	7.98333e-53
646	BNC1	mRNA	43.67	284.07	2.70155	1.15463e-06	1.37426e-05
3371	TNC	mRNA	21733.1	140860	2.6963	1.82212e-21	1.3411e-19
5054	SERPINE1	mRNA	14596.5	94552.5	2.69549	1.52913e-46	6.78314e-44
3111	HLA-DOA	mRNA	51.03	330.41	2.69477	2.57347e-13	8.65539e-12
389643	NUGGC	mRNA	1.26	8.15	2.69446	0.0722831	0.191136
346389	MACC1	mRNA	2.83	18.28	2.69245	0.00191325	0.00982851
2811	GP1BA	mRNA	2.23	14.4	2.69243	0.0108498	0.0424199
720	C4A	mRNA	14.95	96.26	2.68715	0.47149	0.715152
7128	TNFAIP3	mRNA	2255.76	14479.3	2.68231	3.26553e-18	1.89389e-16
91526	ANKRD44	mRNA	90.79	579.88	2.67512	1.74728e-30	2.51562e-28
81788	NUAK2	mRNA	78.04	498.16	2.67425	1.36097e-17	7.42113e-16
5097	PCDH1	mRNA	7.28	46.36	2.67086	0.00728697	0.0304639
729873	TBC1D3	mRNA	0.65	4.1	2.66729	0.348202	0.592743
84230	LRRC8C	mRNA	93.06	590.64	2.66601	3.59748e-14	1.3605e-12
85320	ABCC11	mRNA	1.88	11.89	2.65938	0.00737937	0.0307952
6348	CCL3	mRNA	110.53	697.66	2.65809	4.10776e-08	6.53935e-07
3781	KCNN2	mRNA	0.33	2.1	2.65371	0.315627	0.557643
285596	FAM153A	mRNA	0.34	2.11	2.64679	0.243896	0.468172
123872	DNAAF1	mRNA	0.34	2.11	2.64678	0.243578	0.467803
2150	F2RL1	mRNA	0.34	2.1	2.64622	0.319792	0.562326
3491	CCN1	mRNA	2536.14	15867.8	2.6454	6.04555e-11	1.45067e-09
102723796	TLE7	mRNA	0.33	2.09	2.64382	0.33389	0.577891
5265	SERPINA1	mRNA	46.3	289.37	2.64379	1.88087e-06	2.12754e-05
159989	DEUP1	mRNA	0.34	2.1	2.64088	0.24514	0.469923
5898	RALA	mRNA	1468.02	9150.76	2.64002	1.63522e-33	2.8552e-31
4161	MC5R	mRNA	2.76	17.23	2.63977	0.0496852	0.143951
11033	ADAP1	mRNA	29.03	180.61	2.6374	9.55196e-07	1.15702e-05
5158	PDE6B	mRNA	0.33	2.08	2.6374	0.259025	0.488898
6540	SLC6A13	mRNA	0.34	2.09	2.63616	0.236778	0.458932
138881	OR1L8	mRNA	0.33	2.07	2.63144	0.247857	0.473803
342527	SMTNL2	mRNA	0.15	0.93	2.63126	0.509872	0.74759
492	ATP2B3	mRNA	0.15	0.93	2.63126	0.509872	0.74759
5988	RFPL1	mRNA	0.15	0.93	2.63126	0.509872	0.74759
6262	RYR2	mRNA	0.15	0.93	2.63126	0.509872	0.74759
81027	TUBB1	mRNA	0.15	0.93	2.63126	0.509872	0.74759
389941	C1QL3	mRNA	0.34	2.08	2.63023	0.247076	0.472695
10205	MPZL2	mRNA	0.33	2.06	2.63022	0.248113	0.474183
7097	TLR2	mRNA	353.7	2182.35	2.62528	2.18827e-20	1.50908e-18
100419008	PRR20G	mRNA	0.15	0.92	2.62109	0.511572	0.748479
100526771	SMIM35	mRNA	0.15	0.92	2.62109	0.511572	0.748479
26683	OR4F3	mRNA	0.15	0.92	2.62109	0.511572	0.748479
54514	DDX4	mRNA	0.15	0.92	2.62109	0.511572	0.748479
5680	PSG11	mRNA	0.15	0.92	2.62109	0.511572	0.748479
64333	ARHGAP9	mRNA	0.15	0.92	2.62109	0.511572	0.748479
9421	HAND1	mRNA	0.15	0.92	2.62109	0.511572	0.748479
11082	ESM1	mRNA	204.12	1251.27	2.61588	1.10737e-11	2.96497e-10
1890	TYMP	mRNA	1687.14	10338.4	2.61535	1.63166e-10	3.7134e-09
162466	PHOSPHO1	mRNA	0.34	2.05	2.61338	0.327521	0.571003
26740	OR1J2	mRNA	2.52	15.41	2.61269	0.00452884	0.0204715
55848	PLGRKT	mRNA	116.11	709.86	2.612	1.61319e-24	1.54838e-22
11318	GPR182	mRNA	0.15	0.91	2.61086	0.513285	0.749916
4654	MYOD1	mRNA	0.15	0.91	2.61086	0.513285	0.749916
7490	WT1	mRNA	0.15	0.91	2.61086	0.513285	0.749916
84435	ADGRA1	mRNA	0.15	0.91	2.61086	0.513285	0.749916
102723475	KCNE1B	mRNA	0.15	0.91	2.60827	0.513719	0.749941
147744	TMEM190	mRNA	0.15	0.91	2.60827	0.513719	0.749941
222008	VSTM2A	mRNA	0.15	0.91	2.60827	0.513719	0.749941
26290	GALNT8	mRNA	0.15	0.91	2.60827	0.513719	0.749941
345051	REELD1	mRNA	0.15	0.91	2.60827	0.513719	0.749941
3559	IL2RA	mRNA	0.15	0.91	2.60827	0.513719	0.749941
5459	POU4F3	mRNA	0.15	0.91	2.60827	0.513719	0.749941
6588	SLN	mRNA	0.15	0.91	2.60827	0.513719	0.749941
6549	SLC9A2	mRNA	0.34	2.05	2.60676	0.341297	0.585462
1903	S1PR3	mRNA	1080.89	6565.65	2.60272	1.97577e-39	5.49632e-37
102723547	CSAG2	mRNA	0.15	0.91	2.60057	0.515011	0.751026
1852	DUSP9	mRNA	0.15	0.91	2.60057	0.515011	0.751026
64063	PRSS22	mRNA	0.15	0.91	2.60057	0.515011	0.751026
8843	HCAR3	mRNA	0.15	0.91	2.60057	0.515011	0.751026
122060	SLAIN1	mRNA	0.15	0.9	2.59796	0.43528	0.679627
3748	KCNC3	mRNA	17.41	105.41	2.59784	3.49845e-05	0.000296439
25819	NOCT	mRNA	46.83	282.68	2.5938	1.63197e-22	1.30027e-20
26232	FBXO2	mRNA	19.58	118.11	2.59285	4.22303e-08	6.6904e-07
144453	BEST3	mRNA	6.61	39.82	2.5898	4.05071e-05	0.000337707
200150	PLD5	mRNA	0.15	0.9	2.58761	0.517191	0.752521
285489	DOK7	mRNA	0.15	0.9	2.58761	0.517191	0.752521
51208	CLDN18	mRNA	0.15	0.9	2.58761	0.517191	0.752521
112268186	LOC112268186	mRNA	0.15	0.89	2.58499	0.517633	0.752721
441478	NRARP	mRNA	0.15	0.89	2.58499	0.517633	0.752721
63923	TNN	mRNA	0.15	0.89	2.58499	0.517633	0.752721
220441	RNF152	mRNA	58.21	348.96	2.58376	7.79985e-09	1.41146e-07
51458	RHCG	mRNA	8.81	52.74	2.58231	1.7159e-05	0.000155683
6098	ROS1	mRNA	42.96	257.25	2.58197	2.59516e-13	8.71052e-12
6000	RGS7	mRNA	5.56	33.25	2.58086	0.0174564	0.0627214
91543	RSAD2	mRNA	2384.78	14207	2.57467	6.52148e-08	9.94768e-07
113220	KIF12	mRNA	0.15	0.89	2.57455	0.519392	0.754006
59344	ALOXE3	mRNA	0.15	0.89	2.57455	0.519392	0.754006
969	CD69	mRNA	0.15	0.89	2.57455	0.519392	0.754006
27074	LAMP3	mRNA	1.6	9.49	2.56716	0.0352631	0.109699
6891	TAP2	mRNA	1722.37	10178.6	2.56307	1.6618e-40	5.14624e-38
1942	EFNA1	mRNA	4.15	24.53	2.56275	0.0271873	0.0895135
2635	GBP3	mRNA	1757.14	10378.5	2.56229	1.28977e-14	5.10098e-13
342897	NCCRP1	mRNA	0.96	5.65	2.56219	0.122944	0.286834
56164	STK31	mRNA	0.15	0.88	2.56138	0.521613	0.756293
79993	ELOVL7	mRNA	170.86	1005.69	2.55734	1.49569e-11	3.90281e-10
219285	SAMD9L	mRNA	1854.67	10913.5	2.55687	5.01313e-14	1.85316e-12
56892	TCIM	mRNA	67.5	396.96	2.55598	3.97906e-06	4.17039e-05
719	C3AR1	mRNA	51.09	298.68	2.54761	2.58636e-05	0.000226038
57484	RNF150	mRNA	26.95	157.41	2.5461	1.22397e-07	1.7484e-06
6547	SLC8A3	mRNA	1.6	9.23	2.53176	0.0446295	0.132506
3902	LAG3	mRNA	16.83	97.32	2.53166	1.05928e-05	0.000101082
5618	PRLR	mRNA	30.37	174.35	2.52138	3.10599e-13	1.02779e-11
79187	FSD1	mRNA	4.43	25.39	2.52027	0.000714859	0.00419334
3592	IL12A	mRNA	70.82	405.56	2.51776	9.26397e-09	1.65993e-07
2246	FGF1	mRNA	29.83	170.76	2.51738	0.000253196	0.00169344
2888	GRB14	mRNA	8.28	47.39	2.51612	0.000118457	0.000869677
25878	MXRA5	mRNA	1685.38	9613.64	2.51201	4.09737e-08	6.52914e-07
1004	CDH6	mRNA	1.24	7.08	2.5085	0.0736151	0.193691
147040	KCTD11	mRNA	477.93	2712.9	2.50497	7.07691e-24	6.38205e-22
57526	PCDH19	mRNA	2.51	14.24	2.50327	0.0328785	0.103936
94027	CGB7	mRNA	4.14	23.45	2.50064	0.0275159	0.0904502
168544	ZNF467	mRNA	3.18	17.97	2.4966	0.019686	0.0692173
10158	PDZK1IP1	mRNA	10.78	60.37	2.4858	3.19156e-06	3.43721e-05
6498	SKIL	mRNA	597.96	3349.12	2.48566	3.52042e-23	3.00941e-21
110806280	CCDC194	mRNA	0.63	3.55	2.48528	0.221929	0.438647
162979	ZNF296	mRNA	3.47	19.43	2.48439	0.00240373	0.0119626
84941	HSH2D	mRNA	1.28	7.15	2.48217	0.109246	0.262872
8482	SEMA7A	mRNA	290.8	1623.14	2.48068	3.11539e-14	1.18914e-12
6289	SAA2	mRNA	4.76	26.56	2.48059	0.000795825	0.00458472
1672	DEFB1	mRNA	6.05	33.69	2.47658	0.0157344	0.057619
59269	HIVEP3	mRNA	29.18	162.15	2.47403	4.31839e-10	9.31377e-09
90668	CARMIL3	mRNA	4.78	26.53	2.47211	0.0298323	0.0963476
3231	HOXD1	mRNA	0.96	5.3	2.47149	0.095475	0.237321
92521	SPECC1	mRNA	297.29	1648.12	2.47089	1.14161e-56	6.69189e-54
353500	BMP8A	mRNA	0.95	5.27	2.46564	0.0915166	0.229919
51233	DRICH1	mRNA	0.64	3.52	2.46521	0.171922	0.366556
1506	CTRL	mRNA	4.08	22.52	2.4648	0.00816779	0.0335564
84141	EVA1A	mRNA	196.42	1084.33	2.46476	1.83173e-30	2.61427e-28
3569	IL6	mRNA	12430.2	68475.9	2.46175	1.09568e-09	2.22018e-08
219670	ENKUR	mRNA	1.58	8.72	2.46098	0.0600169	0.165541
5154	PDGFA	mRNA	70.57	388.41	2.46043	4.83774e-15	2.0051e-13
4166	CHST6	mRNA	7.34	40.38	2.4603	0.00437902	0.0198811
3040	HBA2	mRNA	0.63	3.49	2.45917	0.293704	0.531895
2668	GDNF	mRNA	193.73	1058.93	2.45051	1.84087e-17	9.84173e-16
10865	ARID5A	mRNA	169.77	926.55	2.4483	3.06416e-24	2.89035e-22
54897	CASZ1	mRNA	1.92	10.5	2.44753	0.0425932	0.12764
118932	ANKRD22	mRNA	2.22	11.98	2.43382	0.0142513	0.0530641
323	APBB2	mRNA	390.98	2110.69	2.43255	3.3645e-18	1.94442e-16
80853	KDM7A	mRNA	433.82	2339.24	2.43088	5.1232e-11	1.24022e-09
4547	MTTP	mRNA	0.93	5.01	2.42722	0.205591	0.416897
11262	SP140	mRNA	26.79	144.04	2.42658	0.00185205	0.00954703
633	BGN	mRNA	2096.18	11232.9	2.42189	1.05718e-19	6.94057e-18
4814	NINJ1	mRNA	1720.14	9216.28	2.42166	9.81058e-14	3.50046e-12
9162	DGKI	mRNA	185.73	991.65	2.41658	1.43586e-08	2.48857e-07
84623	KIRREL3	mRNA	28.34	150.84	2.41184	5.80918e-13	1.86223e-11
8767	RIPK2	mRNA	686.74	3651.9	2.41082	2.08971e-28	2.54063e-26
55092	TMEM51	mRNA	73.41	388.95	2.40553	2.69432e-15	1.14269e-13
54103	GSAP	mRNA	361.69	1915.6	2.40499	2.3594e-41	8.06767e-39
55214	P3H2	mRNA	206.63	1093.37	2.40368	0.00207363	0.0105305
10678	B3GNT2	mRNA	413.22	2186.36	2.40356	2.19883e-40	6.68321e-38
285016	ALKAL2	mRNA	0.34	1.78	2.39952	0.394329	0.641693
286223	C9orf47	mRNA	3.78	19.95	2.39914	0.012581	0.0479382
1282	COL4A1	mRNA	2464.29	12969	2.39582	2.18385e-15	9.33427e-14
285761	DCBLD1	mRNA	610.83	3204.05	2.39106	4.16399e-30	5.79182e-28
54625	PARP14	mRNA	3341.77	17505.5	2.38913	7.65564e-41	2.41638e-38
255809	C19orf38	mRNA	8.48	44.36	2.38706	7.91376e-06	7.75454e-05
54959	ODAM	mRNA	0.34	1.75	2.38532	0.3213	0.56389
7127	TNFAIP2	mRNA	3901.08	20204.2	2.37271	6.95116e-08	1.05346e-06
79962	DNAJC22	mRNA	0.34	1.74	2.37264	0.315651	0.557643
116842	LEAP2	mRNA	0.34	1.74	2.37264	0.315255	0.557362
5209	PFKFB3	mRNA	2279.82	11799.5	2.37173	5.45273e-18	3.09674e-16
146227	BEAN1	mRNA	0.96	4.96	2.36839	0.146275	0.325763
23566	LPAR3	mRNA	0.33	1.72	2.36816	0.403663	0.649818
147111	NOTUM	mRNA	3.14	16.21	2.36759	0.00535744	0.0235552
140894	CNBD2	mRNA	0.34	1.73	2.36706	0.31702	0.558888
153020	RASGEF1B	mRNA	12.92	66.65	2.36641	2.0662e-06	2.31169e-05
9645	MICAL2	mRNA	480.44	2471.18	2.36276	1.62279e-14	6.34165e-13
7052	TGM2	mRNA	7152.22	36750.4	2.3613	6.65238e-27	7.18326e-25
7504	XK	mRNA	0.33	1.72	2.35989	0.327551	0.571003
439996	IFIT1B	mRNA	0.33	1.71	2.35988	0.328418	0.571831
4284	MIP	mRNA	0.33	1.71	2.35312	0.396028	0.642681
284111	SLC13A5	mRNA	0.33	1.7	2.35142	0.407884	0.653833
6530	SLC6A2	mRNA	2.22	11.32	2.34992	0.0247406	0.0831423
57475	PLEKHH1	mRNA	8.79	44.72	2.3471	3.16793e-05	0.000271374
26270	FBXO6	mRNA	191.73	974.83	2.34607	3.20241e-20	2.16301e-18
222611	ADGRF2	mRNA	0.34	1.71	2.34535	0.408043	0.653913
1366	CLDN7	mRNA	31.7	160.84	2.34304	0.000185049	0.00128586
27123	DKK2	mRNA	0.63	3.19	2.34145	0.265637	0.496289
2180	ACSL1	mRNA	2939.34	14847.8	2.33669	3.4323e-14	1.30102e-12
56675	NRIP3	mRNA	209.81	1057.37	2.33333	2.36908e-27	2.71914e-25
84632	AFAP1L2	mRNA	0.64	3.22	2.32993	0.230805	0.451191
4070	TACSTD2	mRNA	82.42	413.94	2.3283	1.94377e-08	3.3026e-07
102723996	LOC102723996	mRNA	30.07	150.93	2.32774	3.07445e-07	4.09918e-06
162417	NAGS	mRNA	27.28	136.8	2.32597	3.46196e-05	0.000293649
761	CA3	mRNA	0.63	3.18	2.32399	0.251548	0.47874
79822	ARHGAP28	mRNA	395.05	1975.74	2.32229	9.95454e-08	1.44844e-06
161357	MDGA2	mRNA	0.64	3.17	2.31513	0.192809	0.398812
203190	LGI3	mRNA	0.63	3.15	2.31383	0.236125	0.4581
53841	CDHR5	mRNA	0.63	3.15	2.31383	0.236125	0.4581
145501	ISM2	mRNA	21.17	104.8	2.30732	0.000815214	0.00468163
168455	CCDC71L	mRNA	1161.7	5745.12	2.3061	2.1489e-51	1.06879e-48
65108	MARCKSL1	mRNA	236.72	1170.45	2.30583	1.06917e-29	1.42669e-27
5332	PLCB4	mRNA	172.61	852.85	2.30481	5.20071e-12	1.46163e-10
3576	CXCL8	mRNA	23203.5	114238	2.29963	3.50015e-11	8.71744e-10
146439	BICDL2	mRNA	9.43	46.44	2.29958	5.0146e-05	0.000410293
140686	WFDC3	mRNA	6.61	32.49	2.29729	0.000325367	0.00209822
3663	IRF5	mRNA	3.81	18.64	2.28966	0.00603501	0.0259912
93166	PRDM6	mRNA	16.43	79.97	2.28363	2.63547e-05	0.000229596
197021	LCTL	mRNA	1.88	9.11	2.27513	0.0579966	0.161476
5800	PTPRO	mRNA	10.35	50.07	2.27466	7.21861e-06	7.11159e-05
8542	APOL1	mRNA	5305.01	25660.7	2.27414	1.76357e-57	1.11329e-54
57631	LRCH2	mRNA	135.56	655.08	2.27272	6.4953e-31	9.69158e-29
5172	SLC26A4	mRNA	5.38	25.91	2.26888	0.000472566	0.00292027
860	RUNX2	mRNA	196.56	946.44	2.26751	7.74205e-18	4.33687e-16
57689	LRRC4C	mRNA	2.2	10.58	2.26665	0.0730413	0.19249
402665	IGLON5	mRNA	5.72	27.36	2.25705	0.022694	0.0774218
1318	SLC31A2	mRNA	404.41	1932.04	2.25622	1.11419e-25	1.14295e-23
1959	EGR2	mRNA	118.6	566.33	2.25557	8.63276e-08	1.27304e-06
11040	PIM2	mRNA	75.94	361.51	2.25106	3.58846e-10	7.8217e-09
8877	SPHK1	mRNA	499.24	2375.75	2.25056	1.6828e-24	1.6058e-22
11274	USP18	mRNA	304.75	1449.89	2.25025	1.23554e-15	5.48077e-14
58480	RHOU	mRNA	117.69	559.28	2.24862	1.33764e-09	2.67741e-08
9365	KL	mRNA	33.6	159.16	2.2441	6.18163e-07	7.76275e-06
127294	MYOM3	mRNA	27.03	127.7	2.24015	1.29483e-08	2.25845e-07
5744	PTHLH	mRNA	438.25	2070.03	2.23981	0.00346165	0.0162332
419	ART3	mRNA	10.4	48.89	2.23256	6.79254e-05	0.000534192
4504	MT3	mRNA	30.78	144.29	2.22887	0.000340829	0.00218517
79656	BEND5	mRNA	23.68	110.89	2.22742	0.00327675	0.0155168
8989	TRPA1	mRNA	188.8	884.11	2.22741	2.3698e-08	3.97299e-07
60494	CCDC81	mRNA	2.2	10.22	2.21908	0.0290381	0.0943767
165631	PARP15	mRNA	99.02	459.92	2.21564	4.09283e-08	6.52824e-07
1809	DPYSL3	mRNA	1883.44	8744.73	2.21504	3.36721e-22	2.64431e-20
18	ABAT	mRNA	128.6	593.87	2.2073	4.61459e-11	1.12206e-09
3586	IL10	mRNA	1.24	5.69	2.20374	0.220223	0.436379
2066	ERBB4	mRNA	0.61	2.83	2.2017	0.286864	0.523435
2886	GRB7	mRNA	2.53	11.63	2.20028	0.0374542	0.115184
146857	SLFN13	mRNA	10.16	46.65	2.19938	0.000318794	0.00205999
57162	PELI1	mRNA	99.09	454.55	2.1976	5.33915e-23	4.49392e-21
11320	MGAT4A	mRNA	8.09	37.06	2.19596	0.000508183	0.00311115
1236	CCR7	mRNA	8.57	38.75	2.17702	0.00714802	0.0299899
116443	GRIN3A	mRNA	0.94	4.22	2.17199	0.178034	0.376072
23078	VWA8	mRNA	315.33	1419.41	2.17035	1.03695e-23	9.30026e-22
63876	PKNOX2	mRNA	27.38	123.16	2.16922	0.0019306	0.00990457
1520	CTSS	mRNA	3871.09	17390	2.16744	2.0978e-22	1.66334e-20
1075	CTSC	mRNA	195.53	878.33	2.16739	2.22201e-06	2.46584e-05
23576	DDAH1	mRNA	196.32	881.46	2.16668	1.17053e-16	5.75206e-15
360200	TMPRSS9	mRNA	0.62	2.8	2.16416	0.254788	0.483393
3868	KRT16	mRNA	1.25	5.59	2.16315	0.115609	0.274046
84541	KBTBD8	mRNA	34.25	153.1	2.16023	6.29505e-07	7.88707e-06
7124	TNF	mRNA	6.27	28.02	2.16002	0.0336329	0.10569
90167	FRMD7	mRNA	1.57	7.01	2.15955	0.0600546	0.165576
7163	TPD52	mRNA	13.21	58.92	2.15704	1.79923e-06	2.04366e-05
390937	ERFL	mRNA	1.58	7.05	2.15309	0.0756141	0.197715
5753	PTK6	mRNA	0.63	2.82	2.15188	0.282428	0.518222
163175	LGI4	mRNA	19.27	85.48	2.14942	5.27663e-05	0.000429377
8856	NR1I2	mRNA	0.63	2.78	2.14713	0.251769	0.478939
2256	FGF11	mRNA	165.58	732.54	2.14539	6.95531e-07	8.65486e-06
241	ALOX5AP	mRNA	0.95	4.19	2.14187	0.175961	0.372844
157753	TMEM74	mRNA	0.96	4.21	2.1417	0.176236	0.373234
339416	ANKRD45	mRNA	7.57	33.39	2.14104	0.000150112	0.0010675
57007	ACKR3	mRNA	4203.81	18539.5	2.14083	7.32311e-14	2.66506e-12
10906	TRAFD1	mRNA	615.68	2710.23	2.13815	5.09319e-27	5.57297e-25
2921	CXCL3	mRNA	2460.05	10811.1	2.13575	1.76457e-07	2.45856e-06
64761	PARP12	mRNA	914.18	4014	2.13449	4.80521e-40	1.43396e-37
22986	SORCS3	mRNA	0.64	2.82	2.13205	0.302	0.542481
4277	MICB	mRNA	139.66	611.87	2.13134	3.82657e-15	1.5981e-13
653361	NCF1	mRNA	0.64	2.81	2.12944	0.287445	0.524204
5293	PIK3CD	mRNA	293.25	1277.9	2.12357	4.05869e-11	1.00173e-09
90139	TSPAN18	mRNA	3.23	14.04	2.12207	0.0993181	0.244761
219	ALDH1B1	mRNA	278.12	1210.18	2.12142	7.43415e-15	3.03524e-13
1261	CNGA3	mRNA	51.08	222.12	2.1205	0.25743	0.486718
7286	TUFT1	mRNA	216.99	942.46	2.11883	1.13251e-19	7.37612e-18
644150	WIPF3	mRNA	2.83	12.29	2.11782	0.021195	0.0733755
55612	FERMT1	mRNA	35.37	153.2	2.11499	6.88848e-07	8.58471e-06
25822	DNAJB5	mRNA	369.67	1600.09	2.11383	2.19518e-35	4.50368e-33
58538	MPP4	mRNA	12.31	53.04	2.10774	2.36279e-05	0.000208609
53826	FXYD6	mRNA	2.56	11.02	2.10751	0.0942527	0.235079
2628	GATM	mRNA	2.21	9.5	2.10204	0.0465782	0.137103
64651	CSRNP1	mRNA	315.84	1354.44	2.10044	4.14038e-17	2.11701e-15
4502	MT2A	mRNA	12003.8	51467.2	2.10016	1.56489e-12	4.76521e-11
3112	HLA-DOB	mRNA	12.47	53.34	2.09684	0.00454472	0.0205263
60489	APOBEC3G	mRNA	158.74	678.36	2.09535	4.79035e-10	1.02375e-08
56265	CPXM1	mRNA	93.07	397	2.0927	0.198185	0.406107
131034	CPNE4	mRNA	3.76	16.05	2.09248	0.0528732	0.150635
284348	LYPD5	mRNA	10.83	46.14	2.09049	0.000510144	0.00312192
85301	COL27A1	mRNA	320.26	1360.85	2.08718	1.67425e-05	0.000152241
8828	NRP2	mRNA	3300.66	14017.3	2.08638	4.22016e-11	1.03536e-09
100528017	SAA2-SAA4	mRNA	0.34	1.42	2.08467	0.560415	0.790012
284451	ODF3L2	mRNA	0.34	1.42	2.08467	0.560415	0.790012
4314	MMP3	mRNA	23815.4	100720	2.08038	3.41196e-11	8.52366e-10
122786	FRMD6	mRNA	2587.21	10936.5	2.07968	2.66305e-20	1.80614e-18
27189	IL17C	mRNA	1.25	5.27	2.07779	0.146972	0.326952
10420	TESK2	mRNA	58.06	244.8	2.07587	1.21274e-10	2.8114e-09
8912	CACNA1H	mRNA	0.34	1.42	2.07572	0.480797	0.724477
1311	COMP	mRNA	89.41	376.65	2.07464	2.54694e-07	3.44377e-06
64135	IFIH1	mRNA	1448.8	6098.25	2.07354	5.73386e-13	1.84168e-11
131890	GRK7	mRNA	0.34	1.4	2.06656	0.483729	0.726598
7166	TPH1	mRNA	0.34	1.41	2.06655	0.483229	0.726237
10320	IKZF1	mRNA	1.26	5.27	2.06627	0.166051	0.357318
55295	KLHL26	mRNA	184.66	772.95	2.06554	2.01239e-15	8.64641e-14
10560	SLC19A2	mRNA	264.38	1105.86	2.06452	5.04644e-18	2.87594e-16
10308	ZNF267	mRNA	318.21	1330.6	2.06404	1.09937e-23	9.80651e-22
6546	SLC8A1	mRNA	112.38	469.13	2.06163	1.94855e-05	0.00017482
688	KLF5	mRNA	86.43	360.79	2.06156	4.43245e-21	3.23333e-19
116984	ARAP2	mRNA	39.65	165.31	2.05987	4.47323e-08	7.07313e-07
333932	H3C15	mRNA	0.33	1.38	2.05866	0.413885	0.659058
3361	HTR5A	mRNA	0.34	1.4	2.05865	0.412409	0.657938
6248	RSC1A1	mRNA	22.01	91.69	2.0586	0.000254266	0.00169991
84955	NUDCD1	mRNA	182.46	758.98	2.05645	3.44653e-34	6.57765e-32
55096	EBLN2	mRNA	1.26	5.23	2.05615	0.157074	0.34333
113763	ZBED6CL	mRNA	40.71	168.88	2.05255	1.30142e-05	0.000121158
255119	CFAP299	mRNA	0.33	1.39	2.05178	0.414752	0.659609
5017	OVOL1	mRNA	0.33	1.39	2.05178	0.414752	0.659609
80830	APOL6	mRNA	2417.84	10012.2	2.04998	2.20809e-31	3.45156e-29
124872	B4GALNT2	mRNA	0.33	1.37	2.04997	0.482569	0.725644
1839	HBEGF	mRNA	103.2	426.59	2.0474	3.79803e-12	1.08981e-10
55619	DOCK10	mRNA	304.23	1257.47	2.04729	4.37044e-08	6.91727e-07
1053	CEBPE	mRNA	0.14	0.58	2.04487	0.612302	0.823566
105371419	LOC105371419	mRNA	0.14	0.58	2.04487	0.612302	0.823566
148198	ZNF98	mRNA	0.14	0.58	2.04487	0.612302	0.823566
148641	SLC35F3	mRNA	0.14	0.58	2.04487	0.612302	0.823566
2104	ESRRG	mRNA	0.14	0.58	2.04487	0.612302	0.823566
219865	OR8G5	mRNA	0.14	0.58	2.04487	0.612302	0.823566
257177	CFAP126	mRNA	0.14	0.58	2.04487	0.612302	0.823566
26050	SLITRK5	mRNA	0.14	0.58	2.04487	0.612302	0.823566
2637	GBX2	mRNA	0.14	0.58	2.04487	0.612302	0.823566
2840	GPR17	mRNA	0.14	0.58	2.04487	0.612302	0.823566
285025	CCDC141	mRNA	0.14	0.58	2.04487	0.612302	0.823566
286187	PPP1R42	mRNA	0.14	0.58	2.04487	0.612302	0.823566
3360	HTR4	mRNA	0.14	0.58	2.04487	0.612302	0.823566
389257	LRRC14B	mRNA	0.14	0.58	2.04487	0.612302	0.823566
389421	LIN28B	mRNA	0.14	0.58	2.04487	0.612302	0.823566
441151	TMEM151B	mRNA	0.14	0.58	2.04487	0.612302	0.823566
6263	RYR3	mRNA	0.14	0.58	2.04487	0.612302	0.823566
7054	TH	mRNA	0.14	0.58	2.04487	0.612302	0.823566
84000	TMPRSS13	mRNA	0.14	0.58	2.04487	0.612302	0.823566
91181	NUP210L	mRNA	0.14	0.58	2.04487	0.612302	0.823566
93408	MYL10	mRNA	0.14	0.58	2.04487	0.612302	0.823566
3109	HLA-DMB	mRNA	46.88	193.42	2.04466	1.30443e-11	3.46434e-10
150786	RAB6D	mRNA	0.33	1.38	2.04445	0.489619	0.731154
65999	LRRC61	mRNA	118.22	487.64	2.04439	1.4074e-15	6.17637e-14
8707	B3GALT2	mRNA	0.34	1.38	2.04311	0.416662	0.661061
387837	CLEC12B	mRNA	0.33	1.38	2.0431	0.41713	0.661472
148113	CILP2	mRNA	3.16	13.02	2.04278	0.0260492	0.0867233
196996	GRAMD2A	mRNA	0.94	3.85	2.03975	0.196411	0.403805
3594	IL12RB1	mRNA	20.8	85.51	2.03933	2.53147e-08	4.21817e-07
54933	RHBDL2	mRNA	38.09	155.94	2.03342	2.14269e-13	7.29626e-12
59340	HRH4	mRNA	0.33	1.37	2.03321	0.492612	0.734154
8647	ABCB11	mRNA	0.33	1.37	2.03321	0.492612	0.734154
107986982	LOC107986982	mRNA	0.14	0.57	2.03024	0.61496	0.824234
119774	OR52K2	mRNA	0.14	0.57	2.03024	0.61496	0.824234
131405	TRIM71	mRNA	0.14	0.57	2.03024	0.61496	0.824234
1358	CPA2	mRNA	0.14	0.57	2.03024	0.61496	0.824234
27022	FOXD3	mRNA	0.14	0.57	2.03024	0.61496	0.824234
27039	PKD2L2	mRNA	0.14	0.57	2.03024	0.61496	0.824234
28316	CDH20	mRNA	0.14	0.57	2.03024	0.61496	0.824234
340393	TMEM249	mRNA	0.14	0.57	2.03024	0.61496	0.824234
3641	INSL4	mRNA	0.14	0.57	2.03024	0.61496	0.824234
4625	MYH7	mRNA	0.14	0.57	2.03024	0.61496	0.824234
50700	RDH8	mRNA	0.14	0.57	2.03024	0.61496	0.824234
548596	CKMT1A	mRNA	0.14	0.57	2.03024	0.61496	0.824234
57822	GRHL3	mRNA	0.14	0.57	2.03024	0.61496	0.824234
63924	CIDEC	mRNA	0.14	0.57	2.03024	0.61496	0.824234
651	BMP3	mRNA	0.14	0.57	2.03024	0.61496	0.824234
695	BTK	mRNA	0.14	0.57	2.03024	0.61496	0.824234
863	CBFA2T3	mRNA	0.14	0.57	2.03024	0.61496	0.824234
9048	ARTN	mRNA	0.14	0.57	2.03024	0.61496	0.824234
51760	SYT17	mRNA	8.29	33.83	2.02884	0.00221721	0.0111526
56938	ARNTL2	mRNA	728.33	2967.79	2.02673	2.01986e-23	1.7634e-21
9699	RIMS2	mRNA	0.95	3.86	2.02438	0.203273	0.413391
168374	ZNF92	mRNA	78.34	318.05	2.02146	2.08389e-19	1.32057e-17
330	BIRC3	mRNA	703.67	2856.86	2.02146	2.39835e-10	5.34113e-09
57864	SLC46A2	mRNA	1.9	7.7	2.0203	0.181286	0.381174
377007	KLHL30	mRNA	2.83	11.47	2.0179	0.0457574	0.135124
100289462	DEFB4B	mRNA	0.14	0.56	2.0155	0.617643	0.824234
100913187	APOBEC3A_B	mRNA	0.14	0.56	2.0155	0.617643	0.824234
120356740	TOMT	mRNA	0.14	0.56	2.0155	0.617643	0.824234
219681	ARMC3	mRNA	0.14	0.56	2.0155	0.617643	0.824234
222659	PXT1	mRNA	0.14	0.56	2.0155	0.617643	0.824234
254187	TSGA10IP	mRNA	0.14	0.56	2.0155	0.617643	0.824234
255798	SMCO1	mRNA	0.14	0.56	2.0155	0.617643	0.824234
2572	GAD2	mRNA	0.14	0.56	2.0155	0.617643	0.824234
337959	KRTAP13-2	mRNA	0.14	0.56	2.0155	0.617643	0.824234
338440	ANO9	mRNA	0.14	0.56	2.0155	0.617643	0.824234
343413	FCRL6	mRNA	0.14	0.56	2.0155	0.617643	0.824234
54967	CT55	mRNA	0.14	0.56	2.0155	0.617643	0.824234
54997	TESC	mRNA	0.14	0.56	2.0155	0.617643	0.824234
6725	SRMS	mRNA	0.14	0.56	2.0155	0.617643	0.824234
728637	MEIKIN	mRNA	0.14	0.56	2.0155	0.617643	0.824234
8484	GALR3	mRNA	0.14	0.56	2.0155	0.617643	0.824234
3437	IFIT3	mRNA	6359.08	25665.7	2.01295	3.41591e-14	1.29781e-12
100287284	MANSC4	mRNA	0.14	0.56	2.01173	0.618331	0.824234
100288413	ERVMER34-1	mRNA	0.14	0.56	2.01173	0.618331	0.824234
1038	CDR1	mRNA	0.14	0.56	2.01173	0.618331	0.824234
10599	SLCO1B1	mRNA	0.14	0.56	2.01173	0.618331	0.824234
107987372	LOC107987372	mRNA	0.14	0.56	2.01173	0.618331	0.824234
1081	CGA	mRNA	0.14	0.56	2.01173	0.618331	0.824234
11317	RBPJL	mRNA	0.14	0.56	2.01173	0.618331	0.824234
114569	MAL2	mRNA	0.14	0.56	2.01173	0.618331	0.824234
1439	CSF2RB	mRNA	0.14	0.56	2.01173	0.618331	0.824234
144423	GLT1D1	mRNA	0.14	0.56	2.01173	0.618331	0.824234
149499	LRRC71	mRNA	0.14	0.56	2.01173	0.618331	0.824234
167127	UGT3A2	mRNA	0.14	0.56	2.01173	0.618331	0.824234
283571	PROX2	mRNA	0.14	0.56	2.01173	0.618331	0.824234
3216	HOXB6	mRNA	0.14	0.56	2.01173	0.618331	0.824234
338094	FAM151A	mRNA	0.14	0.56	2.01173	0.618331	0.824234
3467	IFNW1	mRNA	0.14	0.56	2.01173	0.618331	0.824234
3595	IL12RB2	mRNA	0.14	0.56	2.01173	0.618331	0.824234
53346	TM6SF1	mRNA	0.14	0.56	2.01173	0.618331	0.824234
8360	H4C4	mRNA	0.14	0.56	2.01173	0.618331	0.824234
220	ALDH1A3	mRNA	1832.11	7383.47	2.0108	4.30059e-09	8.09468e-08
3123	HLA-DRB1	mRNA	599.37	2414.33	2.0101	1.19461e-15	5.32803e-14
1917	EEF1A2	mRNA	4.44	17.84	2.00797	0.0723572	0.191192
3718	JAK3	mRNA	64.07	256.89	2.00349	2.38519e-05	0.000210361
3037	HAS2	mRNA	1111.9	4451.24	2.00118	3.32535e-20	2.23684e-18
55083	KIF26B	mRNA	13.49	53.91	1.99914	0.0273077	0.0898199
10	NAT2	mRNA	0.14	0.55	1.99686	0.621045	0.825074
10170	DHRS9	mRNA	0.14	0.55	1.99686	0.621045	0.825074
11254	SLC6A14	mRNA	0.14	0.55	1.99686	0.621045	0.825074
163404	PLPPR5	mRNA	0.14	0.55	1.99686	0.621045	0.825074
219968	OR5B21	mRNA	0.14	0.55	1.99686	0.621045	0.825074
29842	TFCP2L1	mRNA	0.14	0.55	1.99686	0.621045	0.825074
342918	C19orf81	mRNA	0.14	0.55	1.99686	0.621045	0.825074
388325	SCIMP	mRNA	0.14	0.55	1.99686	0.621045	0.825074
390792	KRT39	mRNA	0.14	0.55	1.99686	0.621045	0.825074
474344	GIMAP6	mRNA	0.14	0.55	1.99686	0.621045	0.825074
51384	WNT16	mRNA	0.14	0.55	1.99686	0.621045	0.825074
51411	BIN2	mRNA	0.14	0.55	1.99686	0.621045	0.825074
57096	RPGRIP1	mRNA	0.14	0.55	1.99686	0.621045	0.825074
83259	PCDH11Y	mRNA	0.14	0.55	1.99686	0.621045	0.825074
84290	CAPNS2	mRNA	0.14	0.55	1.99686	0.621045	0.825074
885	CCK	mRNA	0.14	0.55	1.99686	0.621045	0.825074
10716	TBR1	mRNA	0.63	2.49	1.98553	0.362343	0.608216
4651	MYO10	mRNA	1277.46	5051.59	1.98346	8.72596e-12	2.37511e-10
5743	PTGS2	mRNA	12139.3	47981.3	1.98278	2.05273e-08	3.47334e-07
140609	NEK7	mRNA	1005.84	3967.52	1.97983	2.53652e-24	2.40647e-22
117156	SCGB3A2	mRNA	0.14	0.54	1.97803	0.624487	0.826413
168433	RNF133	mRNA	0.14	0.54	1.97803	0.624487	0.826413
169522	KCNV2	mRNA	0.14	0.54	1.97803	0.624487	0.826413
26280	IL1RAPL2	mRNA	0.14	0.54	1.97803	0.624487	0.826413
317772	H2AC21	mRNA	0.14	0.54	1.97803	0.624487	0.826413
493860	CCDC73	mRNA	0.14	0.54	1.97803	0.624487	0.826413
4994	OR3A1	mRNA	0.14	0.54	1.97803	0.624487	0.826413
5473	PPBP	mRNA	0.14	0.54	1.97803	0.624487	0.826413
55843	ARHGAP15	mRNA	0.14	0.54	1.97803	0.624487	0.826413
728116	ZBTB8B	mRNA	0.14	0.54	1.97803	0.624487	0.826413
728780	ANKDD1B	mRNA	0.14	0.54	1.97803	0.624487	0.826413
729264	TP53TG3D	mRNA	0.14	0.54	1.97803	0.624487	0.826413
29933	GPR132	mRNA	1.61	6.32	1.97776	0.154255	0.338602
8870	IER3	mRNA	3830.11	15071.1	1.97632	9.45252e-16	4.2622e-14
23306	NEMP1	mRNA	318.69	1251.3	1.9732	8.76306e-31	1.28418e-28
159963	SLC5A12	mRNA	2.87	11.23	1.96887	0.133686	0.305342
4582	MUC1	mRNA	363.88	1422.82	1.96722	8.70075e-08	1.28077e-06
23551	RASD2	mRNA	5.38	21.02	1.96689	0.0398188	0.12096
10625	IVNS1ABP	mRNA	581.1	2269.24	1.96536	1.27976e-08	2.23693e-07
254528	MEIOB	mRNA	0.63	2.48	1.96412	0.353786	0.598135
65975	STK33	mRNA	1.91	7.46	1.96206	0.11612	0.274779
27202	C5AR2	mRNA	52.42	203.13	1.95427	8.73695e-05	0.000661132
4772	NFATC1	mRNA	163.34	630.43	1.94843	1.01812e-07	1.47488e-06
57574	MARCHF4	mRNA	43.22	166.77	1.94827	0.000568142	0.00342073
3965	LGALS9	mRNA	154.65	596.42	1.94734	1.75039e-09	3.4697e-08
100529241	HSPE1-MOB4	mRNA	3.73	14.32	1.94296	0.0510739	0.146757
5697	PYY	mRNA	0.64	2.47	1.94068	0.363582	0.609548
5074	PAWR	mRNA	49.03	188.14	1.94019	1.13481e-05	0.000107447
84525	HOPX	mRNA	2.18	8.36	1.93908	0.0705664	0.18778
85449	KIAA1755	mRNA	171	655.28	1.93808	0.000134088	0.000969271
8577	TMEFF1	mRNA	9.33	35.76	1.93775	0.0969405	0.240091
64841	GNPNAT1	mRNA	692.33	2651.76	1.93742	5.23926e-26	5.4772e-24
25780	RASGRP3	mRNA	2.86	10.92	1.93406	0.0398894	0.121107
377677	CA13	mRNA	24.74	94.41	1.93209	3.31185e-06	3.55277e-05
9095	TBX19	mRNA	18.63	71.09	1.93184	3.97155e-06	4.16785e-05
285973	ATG9B	mRNA	13.96	53.15	1.92881	0.00582836	0.025247
8809	IL18R1	mRNA	76.91	292.49	1.92716	2.79976e-07	3.74816e-06
80149	ZC3H12A	mRNA	1585.17	6011.74	1.92315	4.78619e-10	1.02375e-08
8711	TNK1	mRNA	0.94	3.55	1.92188	0.274456	0.507966
23670	CEMIP2	mRNA	624.49	2360.4	1.91829	7.23405e-13	2.30549e-11
644168	DRGX	mRNA	8.68	32.77	1.91673	0.0105702	0.0415144
3075	CFH	mRNA	3338.07	12592.3	1.91545	1.43041e-15	6.26063e-14
148398	SAMD11	mRNA	28	104.99	1.90671	0.00472994	0.0212343
3790	KCNS3	mRNA	15.54	58.14	1.90333	0.000106088	0.000788951
3127	HLA-DRB5	mRNA	163.88	612.59	1.90231	0.529496	0.763406
150864	FAM117B	mRNA	81.8	304.94	1.89831	3.72958e-10	8.10777e-09
113622	ADPRHL1	mRNA	109.43	407.9	1.89815	8.04887e-08	1.1988e-06
56956	LHX9	mRNA	3.52	13.08	1.89471	0.120143	0.281902
197259	MLKL	mRNA	310.4	1153.58	1.89392	3.51161e-07	4.63685e-06
3744	KCNA10	mRNA	0.96	3.56	1.8937	0.271372	0.503679
81607	NECTIN4	mRNA	83.17	308.55	1.89138	1.60086e-09	3.1887e-08
6775	STAT4	mRNA	435.4	1608.06	1.8849	2.65226e-08	4.40157e-07
23345	SYNE1	mRNA	1657.1	6111.25	1.8828	8.47038e-16	3.82987e-14
503542	SPRN	mRNA	10.52	38.8	1.88251	0.00536576	0.0235792
9955	HS3ST3A1	mRNA	95.49	351.28	1.8792	1.22918e-12	3.79934e-11
57194	ATP10A	mRNA	223.59	821.48	1.87736	1.64933e-18	9.77275e-17
112268119	LOC112268119	mRNA	2.2	8.09	1.87701	0.146845	0.326758
1290	COL5A2	mRNA	8738.69	32053.2	1.87498	4.57615e-14	1.70701e-12
29128	UHRF1	mRNA	61.86	226.65	1.87332	1.94944e-06	2.19753e-05
7057	THBS1	mRNA	5384.82	19721.5	1.8728	4.31929e-07	5.57331e-06
4065	LY75	mRNA	131.87	482.85	1.87247	2.29757e-12	6.79461e-11
3430	IFI35	mRNA	1471.65	5387.71	1.87224	2.47719e-17	1.31155e-15
55013	MCUB	mRNA	192.61	704.55	1.87104	1.33145e-11	3.52301e-10
238	ALK	mRNA	12	43.87	1.87055	0.00133977	0.00723107
54869	EPS8L1	mRNA	2.51	9.17	1.86835	0.0705265	0.187734
387856	CCDC184	mRNA	7.27	26.5	1.86686	0.0294716	0.0955019
126755	LRRC38	mRNA	1.55	5.64	1.86512	0.207282	0.419033
4321	MMP12	mRNA	13.34	48.46	1.86078	0.00138352	0.00744757
3560	IL2RB	mRNA	0.96	3.48	1.85897	0.269166	0.500831
23187	PHLDB1	mRNA	1272.86	4605.52	1.85529	2.81282e-13	9.33669e-12
27075	TSPAN13	mRNA	14.36	51.95	1.85469	0.0136696	0.0512469
8938	BAIAP3	mRNA	9.52	34.4	1.85371	0.153275	0.336864
113277	TMEM106A	mRNA	63.2	228.2	1.85236	6.07059e-06	6.10145e-05
729857	RGPD2	mRNA	15.17	54.73	1.85076	0.0226397	0.0773168
9056	SLC7A7	mRNA	94.62	341.27	1.85064	4.0881e-08	6.52704e-07
23033	DOP1A	mRNA	230.96	832.92	1.85052	1.45876e-20	1.01883e-18
94120	SYTL3	mRNA	78.21	281.57	1.84809	9.17651e-08	1.34477e-06
54464	XRN1	mRNA	1325.58	4762.34	1.84505	3.81084e-27	4.28406e-25
83593	RASSF5	mRNA	38.72	139.11	1.845	3.9025e-05	0.000326795
5371	PML	mRNA	1865.17	6692.32	1.8432	4.17604e-24	3.87239e-22
51667	NUB1	mRNA	1407.25	5041.05	1.84084	6.56248e-36	1.49597e-33
5698	PSMB9	mRNA	679.95	2434.25	1.83997	4.99172e-16	2.30138e-14
80133	MROH9	mRNA	17.97	64.08	1.83403	3.46629e-06	3.6991e-05
26150	RIBC2	mRNA	2.15	7.65	1.83337	0.220839	0.437124
65062	TMEM237	mRNA	310.46	1106.33	1.83328	1.86545e-20	1.29736e-18
54149	C21orf91	mRNA	171.74	611.9	1.83308	1.01407e-16	5.05895e-15
63898	SH2D4A	mRNA	368.1	1311.48	1.83302	1.08125e-13	3.82469e-12
10221	TRIB1	mRNA	377.33	1343.7	1.8323	3.77688e-17	1.95552e-15
2048	EPHB2	mRNA	174.36	620.02	1.83022	0.000143647	0.00102686
6926	TBX3	mRNA	807.28	2862.31	1.82604	2.28367e-09	4.45152e-08
84069	PLEKHN1	mRNA	38.68	137.01	1.82478	1.20752e-05	0.000113391
57615	ZNF492	mRNA	1.57	5.54	1.8228	0.178377	0.376505
7004	TEAD4	mRNA	51.98	183.76	1.82165	2.58531e-09	5.02162e-08
54020	SLC37A1	mRNA	58.07	204.87	1.81884	1.3746e-06	1.59896e-05
9260	PDLIM7	mRNA	703.62	2481.35	1.81826	4.56763e-11	1.11229e-09
94240	EPSTI1	mRNA	1052.38	3698.75	1.81338	7.7072e-12	2.11536e-10
11177	BAZ1A	mRNA	479.72	1684.67	1.81221	1.36541e-32	2.26368e-30
55506	MACROH2A2	mRNA	218.03	765.36	1.81163	1.01577e-12	3.16434e-11
728464	METTL24	mRNA	2.51	8.8	1.80929	0.0862981	0.219326
115004	CGAS	mRNA	63.22	221.53	1.80911	3.73849e-11	9.25487e-10
4616	GADD45B	mRNA	322.32	1128.58	1.80795	8.97994e-14	3.21106e-12
113451	AZIN2	mRNA	71.49	250.31	1.80782	3.81509e-05	0.000319638
144406	CFAP251	mRNA	134.57	469.82	1.80371	7.14557e-05	0.000557151
9066	SYT7	mRNA	198.61	691.99	1.80083	5.90983e-06	5.96544e-05
10791	VAMP5	mRNA	775.07	2689.37	1.79487	2.21342e-19	1.39191e-17
6496	SIX3	mRNA	6.99	24.2	1.79105	0.115251	0.273589
9830	TRIM14	mRNA	182.96	632.72	1.79004	6.74708e-12	1.85805e-10
6659	SOX4	mRNA	981.95	3388.25	1.78682	1.57628e-07	2.22074e-06
55388	MCM10	mRNA	15.43	53.17	1.78522	0.0334419	0.105284
2247	FGF2	mRNA	7378.23	25422.6	1.78477	3.58839e-17	1.86381e-15
5837	PYGM	mRNA	119.42	411.23	1.78391	0.00147643	0.00787543
3135	HLA-G	mRNA	46.78	160.98	1.78286	0.0253908	0.0849626
144347	RFLNA	mRNA	66.23	227.88	1.78266	0.0012526	0.00681886
81706	PPP1R14C	mRNA	119.29	409.07	1.77792	4.23558e-06	4.40828e-05
3726	JUNB	mRNA	1656.33	5678.89	1.77762	2.3067e-10	5.144e-09
3800	KIF5C	mRNA	22.62	77.48	1.77621	0.00171307	0.00893443
9953	HS3ST3B1	mRNA	469.2	1605.54	1.77478	1.50637e-09	3.00779e-08
152831	KLB	mRNA	0.61	2.08	1.77179	0.493695	0.735131
54809	SAMD9	mRNA	1868.77	6367.27	1.76859	1.0231e-20	7.23796e-19
6385	SDC4	mRNA	2705.77	9193.13	1.76451	7.29939e-07	9.05555e-06
22891	ZNF365	mRNA	22.83	77.42	1.76196	0.000101891	0.000761536
23539	SLC16A8	mRNA	6.98	23.64	1.76022	0.0106455	0.0417504
5791	PTPRE	mRNA	298.69	1011.37	1.7596	8.8604e-14	3.18218e-12
63967	CLSPN	mRNA	79.23	268.22	1.75928	6.3782e-05	0.000505726
79056	PRRG4	mRNA	83.47	282.58	1.75924	3.38936e-06	3.62827e-05
1123	CHN1	mRNA	35.18	118.99	1.75794	5.28236e-06	5.38506e-05
8082	SSPN	mRNA	227.09	766.21	1.75445	2.86799e-12	8.37585e-11
7421	VDR	mRNA	962.38	3245.91	1.75395	1.64145e-18	9.76126e-17
440093	H3-5	mRNA	0.94	3.17	1.75304	0.294876	0.533276
8638	OASL	mRNA	600	2022.07	1.7528	2.22979e-08	3.76131e-07
26136	TES	mRNA	542.65	1827.75	1.75197	1.7469e-10	3.94386e-09
100131378	C11orf91	mRNA	1.88	6.33	1.75141	0.148173	0.32891
283987	HID1	mRNA	1.26	4.23	1.75034	0.283487	0.519351
6620	SNCB	mRNA	0.64	2.15	1.74746	0.451142	0.695792
978	CDA	mRNA	62.72	210.25	1.74509	5.62666e-05	0.000453587
43	ACHE	mRNA	2.21	7.39	1.74231	0.101486	0.248721
3362	HTR6	mRNA	1.91	6.39	1.74184	0.151843	0.334609
3856	KRT8	mRNA	8.43	28.13	1.73946	0.00998891	0.0395818
9252	RPS6KA5	mRNA	21.11	70.47	1.73943	0.00011951	0.000876067
257068	PLCXD2	mRNA	0.94	3.15	1.73655	0.262167	0.492593
57402	S100A14	mRNA	0.95	3.15	1.73531	0.33442	0.57826
3972	LHB	mRNA	0.96	3.18	1.73195	0.320134	0.562806
4488	MSX2	mRNA	208.52	692.56	1.73176	8.92797e-06	8.64512e-05
6614	SIGLEC1	mRNA	0.97	3.22	1.7297	0.407303	0.653285
116028	RMI2	mRNA	19.24	63.74	1.72839	1.64857e-05	0.000150072
23550	PSD4	mRNA	446.19	1473.71	1.72372	4.49501e-12	1.27421e-10
641700	ECSCR	mRNA	0.95	3.13	1.72367	0.319482	0.562052
2268	FGR	mRNA	0.96	3.17	1.72337	0.303234	0.543932
375593	TRIM73	mRNA	0.97	3.2	1.72212	0.457614	0.701159
56882	CDC42SE1	mRNA	1010.13	3331.51	1.72164	4.33392e-27	4.77401e-25
92797	HELB	mRNA	20.86	68.71	1.72003	0.000125084	0.000912042
6615	SNAI1	mRNA	73.21	240.9	1.71831	2.42103e-05	0.000213064
2324	FLT4	mRNA	1.6	5.26	1.71809	0.207238	0.419013
23158	TBC1D9	mRNA	1278.15	4204.55	1.7179	3.52492e-19	2.18319e-17
84134	TOMM40L	mRNA	114.63	376.71	1.71643	6.1573e-10	1.29897e-08
6091	ROBO1	mRNA	2106.96	6923.58	1.71636	2.14089e-16	1.02147e-14
1756	DMD	mRNA	7.83	25.71	1.71491	0.0179549	0.0641615
2662	GDF10	mRNA	1.6	5.24	1.71241	0.328659	0.571973
9111	NMI	mRNA	451.32	1478.21	1.71164	7.85643e-08	1.17439e-06
57556	SEMA6A	mRNA	81.88	267.6	1.70844	0.000700118	0.00412161
1735	DIO3	mRNA	0.64	2.08	1.70764	0.400291	0.646715
7552	ZNF711	mRNA	0.65	2.11	1.70675	0.505711	0.74518
56300	IL36G	mRNA	3.15	10.27	1.70409	0.231274	0.451786
56935	SMCO4	mRNA	54.82	178.2	1.7006	4.11611e-11	1.01438e-09
7424	VEGFC	mRNA	2803.46	9110.76	1.70036	2.36272e-11	6.0123e-10
1591	CYP24A1	mRNA	22.5	73.11	1.70026	0.0176586	0.0632817
976	ADGRE5	mRNA	912.71	2957.41	1.69611	7.44697e-11	1.77656e-09
5796	PTPRK	mRNA	1618.02	5242.59	1.69605	8.22178e-12	2.2416e-10
6303	SAT1	mRNA	2503.36	8104.51	1.69486	1.38374e-08	2.40585e-07
2047	EPHB1	mRNA	26.96	87.23	1.69386	0.00018077	0.00126201
56121	PCDHB15	mRNA	6.01	19.37	1.68884	0.0196385	0.0690904
10318	TNIP1	mRNA	3053.24	9828.83	1.68668	3.52011e-16	1.64603e-14
6398	SECTM1	mRNA	1687.96	5431.11	1.68597	5.93795e-06	5.99014e-05
2030	SLC29A1	mRNA	165.31	531.58	1.68515	1.83678e-05	0.000165916
100526740	ATP5MF-PTCD1	mRNA	4.85	15.58	1.68477	0.608794	0.821598
219855	SLC37A2	mRNA	14.23	45.74	1.6846	0.000643111	0.00381336
1263	PLK3	mRNA	260.19	834.85	1.68196	4.0768e-16	1.89018e-14
87	ACTN1	mRNA	3660.11	11741.1	1.68161	9.913e-14	3.52933e-12
3696	ITGB8	mRNA	3530.48	11324.7	1.68154	1.62652e-05	0.000148394
51296	SLC15A3	mRNA	1504.98	4824.24	1.68056	2.43697e-08	4.07726e-07
11119	BTN3A1	mRNA	648.92	2079.82	1.68034	8.90222e-08	1.30808e-06
57559	STAMBPL1	mRNA	197.03	631.32	1.67996	1.40574e-11	3.6857e-10
10797	MTHFD2	mRNA	501.06	1603.93	1.67855	1.9082e-11	4.89365e-10
56243	KIAA1217	mRNA	1049.16	3350.56	1.67517	5.02931e-21	3.63639e-19
57169	ZNFX1	mRNA	3303.23	10544.6	1.67456	9.14226e-15	3.66875e-13
1608	DGKG	mRNA	82.64	263.62	1.67361	1.59664e-12	4.84392e-11
6382	SDC1	mRNA	921.76	2936.51	1.67164	8.81254e-05	0.000665624
3783	KCNN4	mRNA	97.18	309.54	1.67136	1.19245e-06	1.41619e-05
116328	C8orf34	mRNA	5.03	16.01	1.67108	0.071745	0.189897
10663	CXCR6	mRNA	0.33	1.05	1.6692	0.663473	0.854771
387273	KRTAP5-10	mRNA	0.33	1.06	1.66917	0.662324	0.854139
8632	DNAH17	mRNA	19.73	62.61	1.66637	0.131215	0.301291
64108	RTP4	mRNA	183.48	582.38	1.66631	9.925e-06	9.52626e-05
79845	RNF122	mRNA	75.43	238.97	1.66353	1.81552e-07	2.52312e-06
115701	ALPK2	mRNA	174.88	553.29	1.66165	1.53267e-11	3.99297e-10
5801	PTPRR	mRNA	2.83	8.96	1.66125	0.239218	0.462025
55106	SLFN12	mRNA	179.02	565.55	1.65949	5.46567e-11	1.31537e-09
11346	SYNPO	mRNA	786.39	2482.82	1.65866	0.0229548	0.078149
9766	SUSD6	mRNA	1548.06	4886.27	1.65827	3.7251e-10	8.10777e-09
5675	PSG6	mRNA	1.87	5.91	1.65801	0.206515	0.418046
84106	PRAM1	mRNA	0.33	1.06	1.65777	0.596756	0.813232
3821	KLRC1	mRNA	0.34	1.06	1.65776	0.596214	0.8128
54456	MOV10L1	mRNA	0.34	1.06	1.65776	0.596214	0.8128
89886	SLAMF9	mRNA	1.91	6.03	1.65408	0.198391	0.406415
3667	IRS1	mRNA	1877.32	5895.92	1.65104	3.42225e-08	5.58344e-07
1002	CDH4	mRNA	4.47	14.01	1.64978	0.115695	0.274209
347148	QRFP	mRNA	0.33	1.04	1.64825	0.600538	0.81569
78986	DUSP26	mRNA	0.33	1.04	1.64825	0.600538	0.81569
6545	SLC7A4	mRNA	0.33	1.05	1.64823	0.599339	0.815348
283600	SLC25A47	mRNA	0.34	1.05	1.64822	0.598795	0.815097
56479	KCNQ5	mRNA	21.94	68.77	1.64811	0.0134715	0.0506499
629	CFB	mRNA	13010.7	40745	1.64693	0.000206162	0.00141697
284067	CFAP97D1	mRNA	0.33	1.03	1.64579	0.601197	0.816312
23504	RIMBP2	mRNA	0.33	1.05	1.64578	0.599997	0.815549
429	ASCL1	mRNA	0.33	1.05	1.64578	0.599997	0.815549
6457	SH3GL3	mRNA	0.33	1.05	1.64578	0.599997	0.815549
8294	H4C9	mRNA	0.33	1.05	1.64578	0.599997	0.815549
838	CASP5	mRNA	0.33	1.05	1.64578	0.599997	0.815549
79473	OR52N1	mRNA	0.34	1.05	1.64577	0.599452	0.815348
84873	ADGRG7	mRNA	0.34	1.05	1.64577	0.599452	0.815348
51268	PIPOX	mRNA	1.92	6	1.64481	0.205726	0.417016
9389	SLC22A14	mRNA	1.58	4.92	1.64266	0.296506	0.53514
8111	GPR68	mRNA	1225.6	3826.58	1.64257	1.38007e-14	5.41893e-13
79713	IGFLR1	mRNA	15.4	48.08	1.64227	0.00048215	0.00297055
286207	CFAP157	mRNA	1.25	3.89	1.64168	0.38484	0.633494
3753	KCNE1	mRNA	8.49	26.49	1.64123	0.0263704	0.0875972
347404	LANCL3	mRNA	8.18	25.5	1.64098	0.0289435	0.094125
8507	ENC1	mRNA	842.11	2623.45	1.63938	0.000973471	0.00548116
100130771	EFCAB10	mRNA	0.33	1.03	1.63878	0.670747	0.855924
389199	LOC389199	mRNA	0.33	1.03	1.63878	0.670747	0.855924
3087	HHEX	mRNA	3.44	10.71	1.63809	0.119895	0.281562
4794	NFKBIE	mRNA	197.85	615.78	1.63798	1.21494e-16	5.93476e-15
22877	MLXIP	mRNA	1202.28	3741.26	1.63775	1.27055e-35	2.74389e-33
2209	FCGR1A	mRNA	0.33	1.03	1.63614	0.5451	0.776693
150248	C22orf15	mRNA	0.33	1.04	1.63614	0.543969	0.776025
51066	SSUH2	mRNA	0.33	1.04	1.63614	0.543969	0.776025
6900	CNTN2	mRNA	0.33	1.04	1.63614	0.543969	0.776025
79958	DENND1C	mRNA	0.33	1.04	1.63614	0.543969	0.776025
119	ADD2	mRNA	0.34	1.04	1.63614	0.543456	0.775704
124842	TMEM132E	mRNA	0.34	1.04	1.63614	0.543456	0.775704
23302	WSCD1	mRNA	0.34	1.04	1.63614	0.543456	0.775704
255743	NPNT	mRNA	0.34	1.04	1.63614	0.543456	0.775704
440	ASNS	mRNA	273.15	848.58	1.63536	3.00576e-05	0.000258697
9865	TRIL	mRNA	13.56	42.1	1.63494	0.00178406	0.0092459
2710	GK	mRNA	717.45	2227.73	1.63463	1.3144e-10	3.02994e-09
10570	DPYSL4	mRNA	150.06	465.33	1.63274	0.00572727	0.0248813
84166	NLRC5	mRNA	1688.8	5233.84	1.63187	2.12332e-17	1.12783e-15
57168	ASPHD2	mRNA	135.66	419.74	1.62948	5.2945e-08	8.25248e-07
254887	ZDHHC23	mRNA	21.11	65.28	1.62852	1.84317e-05	0.000166219
26053	AUTS2	mRNA	255.97	791.34	1.62833	4.78182e-10	1.02375e-08
54739	XAF1	mRNA	1868.16	5772.9	1.62768	1.20618e-06	1.43146e-05
5452	POU2F2	mRNA	806.26	2490.68	1.62722	1.2484e-07	1.78018e-06
4900	NRGN	mRNA	0.34	1.03	1.62652	0.604666	0.818472
256949	KANK3	mRNA	0.33	1.03	1.62651	0.605216	0.818778
4635	MYL4	mRNA	0.33	1.03	1.62651	0.605216	0.818778
646643	SBK2	mRNA	0.33	1.02	1.6265	0.606427	0.819672
6657	SOX2	mRNA	0.33	1.02	1.6265	0.606427	0.819672
6288	SAA1	mRNA	11.96	36.92	1.62562	0.00488579	0.0218295
51090	PLLP	mRNA	0.33	1.03	1.62404	0.605332	0.8188
51127	TRIM17	mRNA	0.33	1.03	1.62404	0.605332	0.8188
3713	IVL	mRNA	0.33	1.03	1.62403	0.605883	0.819342
5354	PLP1	mRNA	0.92	2.82	1.62232	0.426561	0.670287
23022	PALLD	mRNA	1040.27	3201.36	1.62173	1.93288e-20	1.33858e-18
59345	GNB4	mRNA	815.08	2507.15	1.62103	2.39103e-20	1.63516e-18
3431	SP110	mRNA	508.62	1564.08	1.62066	1.71726e-11	4.44408e-10
3645	INSRR	mRNA	1.28	3.92	1.61908	0.411798	0.657837
6993	DYNLT1	mRNA	1014.53	3115.32	1.61856	7.1684e-15	2.94874e-13
5222	PGA5	mRNA	1.24	3.79	1.61667	0.396659	0.643377
54762	GRAMD1C	mRNA	15.2	46.59	1.61579	0.00602504	0.0259672
114793	FMNL2	mRNA	865.27	2649.66	1.6146	7.07525e-33	1.20965e-30
100128569	C19orf71	mRNA	0.33	1.02	1.61432	0.607966	0.821009
1258	CNGB1	mRNA	0.33	1.02	1.61432	0.607966	0.821009
253650	ANKRD18A	mRNA	0.33	1.01	1.61427	0.609736	0.82257
23143	LRCH1	mRNA	264.08	805.53	1.60896	4.06934e-24	3.79489e-22
3843	IPO5	mRNA	3504.07	10681	1.60795	4.08508e-14	1.53429e-12
23586	DDX58	mRNA	1625.41	4949.01	1.60633	1.65179e-13	5.74384e-12
80345	ZSCAN16	mRNA	16.28	49.52	1.60451	0.00165961	0.00867769
9068	ANGPTL1	mRNA	687.14	2086.26	1.60225	1.61129e-07	2.26229e-06
206412	C6orf163	mRNA	0.33	1.01	1.5999	0.678314	0.858444
5454	POU3F2	mRNA	0.33	1	1.59985	0.680012	0.859533
9509	ADAMTS2	mRNA	3939.69	11929.4	1.59836	2.19467e-15	9.35615e-14
4092	SMAD7	mRNA	1213.73	3669.15	1.596	1.36698e-12	4.19368e-11
642273	FAM110C	mRNA	1.88	5.69	1.59568	0.27742	0.512395
861	RUNX1	mRNA	2873.69	8679.45	1.5947	1.65932e-12	5.00633e-11
23607	CD2AP	mRNA	495.88	1496.62	1.59365	1.30191e-13	4.53678e-12
55236	UBA6	mRNA	700.03	2111.56	1.59281	2.20988e-20	1.5176e-18
399	RHOH	mRNA	2.23	6.73	1.59245	0.220529	0.436774
639	PRDM1	mRNA	375.95	1133.37	1.59201	6.94488e-06	6.86821e-05
133308	SLC9B2	mRNA	287.3	865.25	1.59055	8.37404e-18	4.67493e-16
79792	GSDMD	mRNA	389.96	1174.02	1.59005	0.00013906	0.000999297
3557	IL1RN	mRNA	1395.58	4192.01	1.58678	0.0590192	0.163712
89884	LHX4	mRNA	1.88	5.64	1.58356	0.24251	0.466557
166336	PRICKLE2	mRNA	692.06	2073.82	1.58332	4.23178e-11	1.03666e-09
57674	RNF213	mRNA	8899.82	26664.3	1.58306	5.41171e-13	1.74504e-11
54596	L1TD1	mRNA	1.28	3.83	1.58299	0.331491	0.575175
9754	STARD8	mRNA	90.24	270.25	1.58248	9.91856e-11	2.33563e-09
9134	CCNE2	mRNA	19.3	57.77	1.58204	0.0147081	0.0544317
11063	SOX30	mRNA	0.93	2.79	1.58048	0.355548	0.600001
25914	RTTN	mRNA	357.19	1067.52	1.57949	5.36357e-11	1.29459e-09
5533	PPP3CC	mRNA	399.38	1192.84	1.57858	1.66529e-10	3.78042e-09
51703	ACSL5	mRNA	319.04	952.48	1.57794	3.27157e-11	8.21043e-10
3125	HLA-DRB3	mRNA	5.41	16.15	1.5772	0.341893	0.586102
3344	FOXN2	mRNA	248.91	742.55	1.57689	8.42403e-15	3.39714e-13
5724	PTAFR	mRNA	2.83	8.42	1.57254	0.122467	0.285966
55691	FRMD4A	mRNA	361.34	1073.64	1.57106	5.0488e-13	1.64417e-11
54880	BCOR	mRNA	471.79	1400.77	1.57	7.53279e-15	3.06533e-13
9744	ACAP1	mRNA	3.79	11.25	1.56974	0.144378	0.322448
24138	IFIT5	mRNA	936.1	2774.95	1.56773	8.52441e-25	8.27877e-23
58985	IL22RA1	mRNA	20.88	61.88	1.56724	0.00169672	0.00886322
23135	KDM6B	mRNA	431.75	1278.38	1.56604	0.000110685	0.000819057
375035	SFT2D2	mRNA	668.25	1977.8	1.56545	1.96278e-14	7.61586e-13
79190	IRX6	mRNA	28.71	84.94	1.56479	0.00828378	0.0339141
26018	LRIG1	mRNA	3451.81	10211.3	1.56473	1.52789e-06	1.75981e-05
135932	TMEM139	mRNA	0.96	2.83	1.56397	0.376837	0.624664
10437	IFI30	mRNA	3456.47	10192.5	1.56014	3.39159e-16	1.59502e-14
84957	RELT	mRNA	96.73	284.95	1.55867	5.09504e-06	5.21678e-05
9495	AKAP5	mRNA	1.89	5.56	1.55512	0.208222	0.42002
3090	HIC1	mRNA	128.48	377.52	1.55504	0.000617137	0.00367128
124491	TMEM170A	mRNA	192.96	566.52	1.55387	5.39056e-12	1.5124e-10
284498	C1orf167	mRNA	4.47	13.11	1.55331	0.111498	0.266923
7071	KLF10	mRNA	878.27	2577.49	1.55323	5.18762e-12	1.46045e-10
57154	SMURF1	mRNA	554.89	1628.41	1.55318	3.92076e-27	4.37765e-25
29841	GRHL1	mRNA	4.43	13	1.55255	0.0573134	0.159979
5782	PTPN12	mRNA	2156.99	6321.57	1.55127	1.00436e-28	1.25836e-26
7371	UCK2	mRNA	529.41	1549.73	1.54954	2.97441e-09	5.70314e-08
283310	OTOGL	mRNA	4.07	11.92	1.54953	0.0735349	0.193542
1909	EDNRA	mRNA	105.04	307.46	1.54946	0.00727902	0.0304461
51733	UPB1	mRNA	1.57	4.6	1.54944	0.263973	0.494758
126353	MISP	mRNA	7.31	21.35	1.54677	0.131026	0.301027
6580	SLC22A1	mRNA	8.23	24.02	1.54578	0.028375	0.0926434
8038	ADAM12	mRNA	4255.5	12415.8	1.54478	6.46083e-08	9.8916e-07
91133	L3MBTL4	mRNA	49.32	143.74	1.54314	0.000108436	0.000804592
595	CCND1	mRNA	9292.83	27021.2	1.5399	6.94587e-08	1.05346e-06
8483	CILP	mRNA	18.77	54.55	1.53933	0.0178306	0.0637869
81569	ACTL8	mRNA	2.52	7.32	1.53909	0.179835	0.378754
401612	SLC25A53	mRNA	1.59	4.61	1.53833	0.247517	0.473373
4683	NBN	mRNA	813.38	2358.02	1.53558	4.28472e-24	3.92878e-22
55785	FGD6	mRNA	76.24	220.93	1.53498	0.000263836	0.00175602
139285	AMER1	mRNA	90.94	263.36	1.53398	1.11657e-10	2.61059e-09
1805	DPT	mRNA	30.74	88.85	1.53142	0.00277565	0.0134783
8798	DYRK4	mRNA	99.43	287.4	1.53134	7.90096e-11	1.87397e-09
7980	TFPI2	mRNA	13436.7	38801.9	1.52994	2.135e-05	0.000190134
1435	CSF1	mRNA	8400.42	24244.8	1.52914	1.80681e-10	4.07351e-09
79669	C3orf52	mRNA	17.51	50.54	1.52912	0.00191251	0.00982781
8337	H2AC18	mRNA	750.32	2164.3	1.52831	8.60701e-05	0.000652503
221079	ARL5B	mRNA	415.68	1197.15	1.52606	1.29895e-11	3.45538e-10
201176	ARHGAP27	mRNA	77.82	223.89	1.5246	0.000474418	0.00293012
29968	PSAT1	mRNA	211.09	606.91	1.52365	7.5634e-07	9.34775e-06
4222	MEOX1	mRNA	13.6	39.1	1.52288	0.0567886	0.158813
2172	FABP6	mRNA	0.61	1.76	1.52086	0.504475	0.744333
6737	TRIM21	mRNA	653.81	1867.4	1.5141	1.45887e-17	7.90248e-16
858	CAV2	mRNA	579.04	1653.7	1.51396	3.37038e-08	5.50428e-07
8875	VNN2	mRNA	4.16	11.89	1.51322	0.157972	0.344649
10171	RCL1	mRNA	43.85	125	1.5114	5.21478e-05	0.000425398
9283	GPR37L1	mRNA	16.1	45.87	1.51053	0.0135504	0.0508697
154197	PNLDC1	mRNA	0.62	1.78	1.50997	0.525541	0.760108
6493	SIM2	mRNA	229.89	654	1.50832	1.09747e-11	2.94695e-10
374383	NCR3LG1	mRNA	218.15	619.65	1.50615	0.000159083	0.00112447
124359	CDYL2	mRNA	284.23	805.58	1.50297	8.84188e-10	1.82085e-08
92610	TIFA	mRNA	163.56	463	1.50122	8.8512e-11	2.0933e-09
91010	FMNL3	mRNA	537.49	1519.06	1.49886	2.83118e-12	8.28308e-11
55748	CNDP2	mRNA	1300.86	3673.41	1.49766	3.52223e-22	2.75287e-20
10979	FERMT2	mRNA	2047.06	5778.75	1.4972	1.11771e-16	5.50902e-15
9229	DLGAP1	mRNA	5.99	16.9	1.49718	0.0389234	0.118767
9536	PTGES	mRNA	6830.15	19274.5	1.4967	8.92728e-10	1.83411e-08
284716	RIMKLA	mRNA	13.27	37.35	1.49312	0.00873405	0.0355183
2531	KDSR	mRNA	1954.18	5500.65	1.49304	4.71035e-12	1.33065e-10
112268131	LOC112268131	mRNA	3.74	10.53	1.49227	0.113588	0.270505
79094	CHAC1	mRNA	59.72	167.8	1.4904	5.51925e-07	7.00599e-06
3735	KARS1	mRNA	1416.12	3977.24	1.48982	7.36628e-16	3.33985e-14
148213	ZNF681	mRNA	6.32	17.74	1.48842	0.0497032	0.143952
5362	PLXNA2	mRNA	71.52	200.51	1.48721	0.000412447	0.00258773
9456	HOMER1	mRNA	199.14	557.74	1.48579	1.1729e-07	1.68276e-06
84102	SLC41A2	mRNA	545.37	1523.87	1.48244	1.9494e-10	4.37695e-09
27345	KCNMB4	mRNA	4.77	13.32	1.48115	0.0805364	0.207621
55701	ARHGEF40	mRNA	1373.44	3833.98	1.48105	7.1567e-10	1.50208e-08
79674	VEPH1	mRNA	88.81	247.85	1.48067	7.91975e-08	1.18225e-06
388272	C16orf87	mRNA	91.46	255.15	1.48012	2.80055e-06	3.05622e-05
64750	SMURF2	mRNA	1263.98	3525.89	1.48002	1.41821e-14	5.5554e-13
10849	POLR1G	mRNA	93.16	259.39	1.47735	6.52354e-06	6.49702e-05
50863	NTM	mRNA	69.29	192.63	1.47513	8.68826e-06	8.45289e-05
440026	TMEM41B	mRNA	540.65	1502.88	1.47495	1.76272e-07	2.45808e-06
8748	ADAM20	mRNA	0.63	1.74	1.47374	0.525667	0.760223
4860	PNP	mRNA	348.28	967.08	1.47337	2.54695e-10	5.65672e-09
4940	OAS3	mRNA	3283.01	9112.44	1.47282	2.4339e-06	2.67925e-05
2100	ESR2	mRNA	4.15	11.5	1.4717	0.130252	0.299697
7474	WNT5A	mRNA	4277.77	11837.2	1.4684	3.7751e-05	0.000317259
107987478	LOC107987478	mRNA	0.63	1.76	1.4681	0.518893	0.753813
107987479	LOC107987479	mRNA	0.63	1.76	1.4681	0.518893	0.753813
339855	KY	mRNA	17.11	47.32	1.46781	0.00485533	0.0217199
5771	PTPN2	mRNA	331.53	916.76	1.46742	5.29341e-19	3.22977e-17
3552	IL1A	mRNA	70.19	194	1.46678	0.00720769	0.0301785
710	SERPING1	mRNA	6258.19	17296.9	1.4667	6.85363e-09	1.25826e-07
51312	SLC25A37	mRNA	1925.46	5312.75	1.46425	3.94708e-06	4.14608e-05
51050	PI15	mRNA	0.63	1.75	1.46253	0.520632	0.755471
4998	ORC1	mRNA	18.14	49.97	1.46143	0.0216078	0.0745845
669	BPGM	mRNA	464.23	1275.19	1.45782	1.01239e-06	1.21821e-05
56990	CDC42SE2	mRNA	440.83	1209.94	1.45664	1.14933e-10	2.67574e-09
54726	OTUD4	mRNA	1125.14	3087.8	1.45648	9.88155e-23	7.98945e-21
344387	CDKL4	mRNA	0.64	1.75	1.45497	0.475618	0.718946
51	ACOX1	mRNA	712.89	1953.03	1.45397	1.72569e-10	3.90673e-09
160851	DGKH	mRNA	66.37	181.42	1.45073	1.9627e-06	2.20946e-05
5720	PSME1	mRNA	2322.15	6335.46	1.44799	2.34633e-16	1.11624e-14
79948	PLPPR3	mRNA	8.51	23.21	1.44713	0.0518554	0.148431
79668	PARP8	mRNA	339.96	926.13	1.44586	8.11901e-10	1.68894e-08
79153	GDPD3	mRNA	7.25	19.72	1.44443	0.0580352	0.161528
51330	TNFRSF12A	mRNA	1535.69	4173.11	1.44224	8.41831e-13	2.65711e-11
23779	ARHGAP8	mRNA	0.64	1.75	1.44217	0.526168	0.760679
23515	MORC3	mRNA	539.35	1465.28	1.44189	2.3023e-19	1.44228e-17
122970	ACOT4	mRNA	37.11	100.42	1.43607	0.000299016	0.00194829
246176	GAS2L2	mRNA	1.58	4.28	1.43374	0.378901	0.626906
23764	MAFF	mRNA	1443.46	3891.61	1.43084	4.00826e-16	1.86367e-14
7277	TUBA4A	mRNA	949.57	2559.79	1.43068	6.07113e-09	1.1234e-07
84617	TUBB6	mRNA	1493.19	4022.04	1.42953	2.28678e-13	7.7708e-12
55526	DHTKD1	mRNA	372.07	1001.73	1.42886	3.92143e-17	2.01133e-15
26157	GIMAP2	mRNA	87.77	236.04	1.42718	8.81623e-06	8.55711e-05
114294	LACTB	mRNA	679.22	1825.98	1.42671	2.13679e-10	4.77808e-09
65249	ZSWIM4	mRNA	308.7	829.1	1.42535	1.18417e-13	4.16182e-12
7046	TGFBR1	mRNA	1816.72	4876.34	1.42447	1.15511e-11	3.08775e-10
6513	SLC2A1	mRNA	3555.75	9530.1	1.42234	4.68041e-06	4.82535e-05
79930	DOK3	mRNA	45.19	121.08	1.42204	0.025224	0.0845072
4773	NFATC2	mRNA	3.4	9.09	1.41919	0.176022	0.372926
4170	MCL1	mRNA	4152.03	11099.4	1.41859	5.80086e-23	4.84356e-21
5106	PCK2	mRNA	250.01	668.31	1.41856	0.000241687	0.00162908
23258	DENND5A	mRNA	3603.52	9621.75	1.41689	6.26675e-09	1.15829e-07
2752	GLUL	mRNA	2583.18	6894.73	1.41635	1.73485e-13	6.00719e-12
7391	USF1	mRNA	457.74	1220.95	1.41541	1.98138e-17	1.05586e-15
23284	ADGRL3	mRNA	0.93	2.48	1.41471	0.502002	0.742495
255488	RNF144B	mRNA	237.91	634.19	1.41452	1.26666e-05	0.00011846
85441	HELZ2	mRNA	1578.07	4206.67	1.41452	0.164826	0.355492
64123	ADGRL4	mRNA	465.28	1240.19	1.41438	0.0616589	0.169034
114336	CGB2	mRNA	1.6	4.27	1.41392	0.443645	0.687716
5970	RELA	mRNA	1385.1	3687.79	1.41276	3.25783e-15	1.37457e-13
5913	RAPSN	mRNA	0.93	2.48	1.41199	0.439376	0.683671
8548	BLZF1	mRNA	374.82	997.08	1.41152	6.34238e-15	2.6221e-13
81542	TMX1	mRNA	1117.56	2971.58	1.41088	4.63401e-30	6.33816e-28
55861	DBNDD2	mRNA	35.16	93.45	1.41011	0.000288878	0.00189426
8456	FOXN1	mRNA	0.93	2.47	1.40713	0.44097	0.685317
11031	RAB31	mRNA	2328.85	6172.4	1.40621	6.82573e-11	1.63072e-09
79805	VASH2	mRNA	9.87	26.14	1.40446	0.212652	0.425962
23416	KCNH3	mRNA	2.55	6.75	1.40408	0.240367	0.463519
8224	SYN3	mRNA	3.47	9.17	1.40351	0.134795	0.307022
56259	CTNNBL1	mRNA	836.21	2210.56	1.40247	3.00567e-08	4.9332e-07
85450	ITPRIP	mRNA	2191.87	5789.54	1.40129	2.25148e-05	0.000199641
105379554	LOC105379554	mRNA	2.51	6.64	1.40125	0.189655	0.393882
162073	ITPRIPL2	mRNA	1261.56	3331.71	1.40106	6.5189e-14	2.38295e-12
151636	DTX3L	mRNA	3031.98	8006.56	1.40092	1.77006e-18	1.04504e-16
124222	PAQR4	mRNA	54.96	145.02	1.39967	0.000448136	0.00278608
10943	MSL3	mRNA	366.61	967.07	1.39936	4.70693e-19	2.90432e-17
55366	LGR4	mRNA	1134	2991.17	1.39929	0.00016543	0.00116532
257407	C2orf72	mRNA	42.36	111.66	1.39851	0.0064131	0.0273469
2146	EZH2	mRNA	77.64	204.66	1.39836	4.9127e-06	5.04582e-05
6688	SPI1	mRNA	3.46	9.12	1.39824	0.164149	0.354543
25794	FSCN2	mRNA	5.36	14.11	1.39602	0.0748358	0.196117
7571	ZNF23	mRNA	197.36	519.26	1.39563	4.63502e-12	1.31163e-10
22998	LIMCH1	mRNA	222.96	586.42	1.39517	4.58248e-05	0.000378141
29887	SNX10	mRNA	95.25	250.33	1.39406	0.00540773	0.0237191
51141	INSIG2	mRNA	1526.85	4012.15	1.39381	2.08902e-07	2.87644e-06
4939	OAS2	mRNA	2305.87	6056.29	1.39313	2.15407e-06	2.39856e-05
51129	ANGPTL4	mRNA	714.64	1876.24	1.39255	0.000183929	0.00127971
57489	ODF2L	mRNA	185.46	486.57	1.39153	3.65714e-11	9.06716e-10
5329	PLAUR	mRNA	1550.34	4062.72	1.38986	1.32158e-06	1.54825e-05
124935	SLC43A2	mRNA	699.93	1833.64	1.38943	0.000964488	0.00543244
100170841	EPOP	mRNA	26.7	69.93	1.38911	0.00355107	0.0166003
22849	CPEB3	mRNA	39.61	103.71	1.38872	4.29985e-06	4.46385e-05
166785	MMAA	mRNA	199.43	521.67	1.38726	5.58723e-07	7.08537e-06
5277	PIGA	mRNA	105.48	275.61	1.38564	1.46173e-06	1.69072e-05
2683	B4GALT1	mRNA	7201.42	18800.4	1.38441	1.01999e-08	1.8079e-07
51291	GMIP	mRNA	108.99	284.35	1.38352	5.63537e-06	5.71299e-05
25790	CFAP45	mRNA	5.66	14.76	1.38341	0.0710958	0.188544
283659	PRTG	mRNA	51.62	134.59	1.38239	0.00287883	0.0139012
54887	UHRF1BP1	mRNA	314.7	820.16	1.3819	3.0941e-05	0.000265743
84695	LOXL3	mRNA	497.61	1296.65	1.38168	0.00824785	0.0337923
1164	CKS2	mRNA	161.68	421.22	1.38142	0.00170851	0.00891629
136853	SSC4D	mRNA	12.6	32.82	1.38104	0.0173859	0.0624818
3113	HLA-DPA1	mRNA	524.48	1365.72	1.38071	0.114242	0.271786
55859	BEX1	mRNA	79.73	207.16	1.37754	0.0151053	0.0556257
4958	OMD	mRNA	2.53	6.56	1.3771	0.269269	0.500908
83854	ANGPTL6	mRNA	15.11	39.24	1.37653	0.0257027	0.0857959
9997	SCO2	mRNA	246.16	638.84	1.37584	5.11319e-07	6.51574e-06
834	CASP1	mRNA	274.49	712.12	1.37538	1.6817e-09	3.34161e-08
51334	PRR16	mRNA	187.21	485.38	1.37449	3.95142e-12	1.12791e-10
1284	COL4A2	mRNA	6657.74	17244.3	1.37302	5.11743e-08	8.01454e-07
55973	BCAP29	mRNA	780.83	2021.15	1.37209	1.34047e-11	3.53715e-10
54329	GPR85	mRNA	23.6	61.08	1.37182	0.0374134	0.115123
54033	RBM11	mRNA	0.96	2.48	1.37064	0.452873	0.697542
2863	GPR39	mRNA	161.92	418.29	1.36924	1.46041e-07	2.06814e-06
8728	ADAM19	mRNA	135.7	350.48	1.36891	4.82153e-06	4.95527e-05
6258	RXRG	mRNA	2.19	5.66	1.36714	0.275965	0.510296
5641	LGMN	mRNA	1350.99	3482.1	1.36594	1.99204e-05	0.000178468
286204	CRB2	mRNA	0.94	2.42	1.36577	0.47055	0.71418
840	CASP7	mRNA	611.09	1574.64	1.36555	2.27341e-08	3.82702e-07
5352	PLOD2	mRNA	13272.3	34146.8	1.36333	2.26854e-06	2.51578e-05
9034	CCRL2	mRNA	58.41	150.13	1.36202	0.00130337	0.00704848
221037	JMJD1C	mRNA	930.54	2391.45	1.36175	1.80061e-11	4.63967e-10
55800	SCN3B	mRNA	6.3	16.18	1.36127	0.0621727	0.170244
3918	LAMC2	mRNA	252.76	649.21	1.3609	0.196528	0.40396
3091	HIF1A	mRNA	14066.6	35998.5	1.35566	7.1949e-20	4.77628e-18
5359	PLSCR1	mRNA	1703.24	4356.34	1.35483	5.63984e-09	1.05309e-07
943	TNFRSF8	mRNA	12.59	32.18	1.35419	0.066996	0.180293
6482	ST3GAL1	mRNA	5206.95	13306.8	1.35365	6.24092e-07	7.82523e-06
4664	NAB1	mRNA	1309.9	3346.55	1.35322	7.79968e-09	1.41146e-07
11076	TPPP	mRNA	1.23	3.15	1.35234	0.415474	0.660387
80206	FHOD3	mRNA	430.51	1099.19	1.35232	9.57319e-08	1.39915e-06
1316	KLF6	mRNA	1577.84	4027.72	1.35201	7.46964e-09	1.35695e-07
9294	S1PR2	mRNA	312.75	798.24	1.35181	1.68727e-10	3.82503e-09
8407	TAGLN2	mRNA	5009.98	12758.5	1.34858	6.61361e-14	2.4122e-12
339122	RAB43	mRNA	500.67	1273.91	1.34734	3.87912e-09	7.33502e-08
11123	RCAN3	mRNA	78.97	200.86	1.34683	5.7073e-05	0.00045877
89876	CFAP91	mRNA	14.86	37.71	1.34391	0.0497404	0.144035
285237	C3orf38	mRNA	443.88	1125.96	1.34292	5.24375e-11	1.26754e-09
9404	LPXN	mRNA	771.68	1957.25	1.34276	1.05148e-11	2.83207e-10
283358	B4GALNT3	mRNA	124.89	316.58	1.34187	0.000814849	0.00468118
9890	PLPPR4	mRNA	112.13	283.94	1.34044	0.017055	0.0615895
5629	PROX1	mRNA	5.96	15.09	1.33994	0.0851658	0.21702
341346	SMCO2	mRNA	1.27	3.2	1.33931	0.391483	0.639747
113791	PIK3IP1	mRNA	363.06	917.64	1.33772	9.17259e-12	2.49255e-10
5685	PSMA4	mRNA	1502.76	3798.12	1.33767	3.86718e-17	1.98972e-15
29992	PILRA	mRNA	165.35	417.3	1.33559	0.00818088	0.033585
9848	MFAP3L	mRNA	96.36	243.1	1.33512	0.00506228	0.0224754
57655	GRAMD1A	mRNA	698.62	1760.56	1.33345	0.000136343	0.000982784
3490	IGFBP7	mRNA	4998.15	12588.2	1.3326	1.68142e-11	4.35975e-10
9465	AKAP7	mRNA	48.39	121.86	1.3325	8.85488e-05	0.000668208
121601	ANO4	mRNA	3.77	9.48	1.33102	0.239646	0.462471
91351	DDX60L	mRNA	1055.94	2653.98	1.32963	1.76843e-09	3.49701e-08
647024	C6orf132	mRNA	132.36	332.67	1.32962	2.11252e-07	2.90635e-06
9306	SOCS6	mRNA	833.57	2093.8	1.32874	1.10579e-21	8.24967e-20
54619	CCNJ	mRNA	53.8	134.98	1.32705	9.59252e-06	9.24498e-05
440689	H2BC18	mRNA	17.39	43.61	1.32663	0.00885033	0.0358934
7130	TNFAIP6	mRNA	18110	45410.3	1.32623	0.000231922	0.001571
8140	SLC7A5	mRNA	1383.01	3465.61	1.3253	0.123607	0.288094
321	APBA2	mRNA	154.71	387.4	1.32424	0.00338604	0.0159332
26230	TIAM2	mRNA	147.78	369.71	1.32296	5.1556e-06	5.27079e-05
653140	FAM228A	mRNA	3.5	8.75	1.32262	0.181429	0.381329
23541	SEC14L2	mRNA	91.13	227.93	1.32256	2.51822e-05	0.000220435
135152	B3GAT2	mRNA	3.79	9.48	1.321	0.168766	0.361519
80216	ALPK1	mRNA	289.97	724.37	1.32082	2.44527e-08	4.08699e-07
79899	PRR5L	mRNA	104.75	261.59	1.32035	0.00380162	0.0175962
51514	DTL	mRNA	60.03	149.78	1.31911	0.0442801	0.131707
7483	WNT9A	mRNA	20.76	51.76	1.31819	0.006767	0.0285886
645369	TMEM200C	mRNA	6.98	17.41	1.31804	0.160954	0.349067
3201	HOXA4	mRNA	46.63	116.15	1.31665	0.000880128	0.00500365
200844	CFAP20DC	mRNA	132.08	328.72	1.31548	0.000178679	0.00124847
29121	CLEC2D	mRNA	29.32	72.95	1.31512	0.000323541	0.00208819
8553	BHLHE40	mRNA	2606.55	6483.62	1.31466	1.52813e-07	2.15845e-06
1446	CSN1S1	mRNA	1.27	3.16	1.31439	0.499705	0.740489
5993	RFX5	mRNA	544.03	1351.27	1.31256	3.80573e-17	1.96426e-15
84733	CBX2	mRNA	1.27	3.14	1.31086	0.391498	0.639747
1503	CTPS1	mRNA	237.65	589.35	1.31028	4.45975e-05	0.000368755
4353	MPO	mRNA	1.27	3.16	1.31007	0.438891	0.683446
55905	RNF114	mRNA	1718.32	4254.88	1.30812	2.44366e-20	1.66422e-18
11259	FILIP1L	mRNA	638.03	1578.76	1.3071	1.75867e-07	2.45452e-06
64759	TNS3	mRNA	1975.7	4887.59	1.30676	3.96841e-11	9.80926e-10
70	ACTC1	mRNA	2.82	6.98	1.30552	0.213023	0.426489
843	CASP10	mRNA	64.44	159.13	1.3041	0.00120098	0.00656838
11182	SLC2A6	mRNA	654.89	1615.26	1.30245	9.12611e-10	1.87e-08
56034	PDGFC	mRNA	1566.54	3859.28	1.30075	1.30788e-11	3.46788e-10
143872	ARHGAP42	mRNA	132.18	325.36	1.29949	2.93197e-09	5.62836e-08
100142659	CTAGE8	mRNA	6.36	15.65	1.29926	0.325783	0.5693
441294	CTAGE15	mRNA	3.16	7.77	1.29643	0.219144	0.434799
9480	ONECUT2	mRNA	1.27	3.12	1.29553	0.455537	0.699264
10319	LAMC3	mRNA	3.74	9.19	1.29522	0.225412	0.443608
7010	TEK	mRNA	30.08	73.76	1.29387	0.0135965	0.0510313
84125	LRRIQ1	mRNA	1.27	3.12	1.29237	0.456621	0.700291
79616	CCNJL	mRNA	8.96	21.93	1.29171	0.141518	0.31814
92745	SLC38A5	mRNA	702.93	1719.53	1.29056	0.00688501	0.0289976
158405	KIAA1958	mRNA	38.53	94.25	1.29039	8.9489e-05	0.000674682
91452	ACBD5	mRNA	662.42	1618.08	1.28847	1.33798e-19	8.64574e-18
578	BAK1	mRNA	417.78	1019.49	1.28703	2.57086e-10	5.7021e-09
6251	RSU1	mRNA	1470.22	3587.4	1.28691	1.35381e-10	3.11642e-09
51421	AMOTL2	mRNA	1177.05	2868.31	1.28503	5.87772e-06	5.94033e-05
165082	ADGRF3	mRNA	8.82	21.44	1.28139	0.0559901	0.15733
23528	ZNF281	mRNA	768.59	1866.87	1.28033	1.56801e-19	1.0053e-17
257240	KLHL34	mRNA	1.6	3.88	1.27958	0.417163	0.661472
80323	CCDC68	mRNA	36.62	88.88	1.2794	0.000751754	0.0043752
283635	FAM177A1	mRNA	782.79	1897.68	1.27755	6.35953e-11	1.52378e-09
653489	RGPD3	mRNA	13	31.5	1.27706	0.0304242	0.0977781
10202	DHRS2	mRNA	5.4	13.1	1.27701	0.398822	0.645387
5128	CDK17	mRNA	555.06	1344.19	1.27601	2.06266e-11	5.27327e-10
10957	PNRC1	mRNA	1453.42	3519.38	1.27586	7.2151e-08	1.08743e-06
5029	P2RY2	mRNA	59.87	144.86	1.2748	4.68835e-05	0.000385135
23424	TDRD7	mRNA	467.64	1130.12	1.273	6.30826e-09	1.16465e-07
440836	ODF3B	mRNA	104.16	251.44	1.27146	0.0329354	0.104055
58516	SINHCAF	mRNA	65.35	157.75	1.27132	0.0012031	0.00657778
355	FAS	mRNA	1127.47	2721.12	1.27111	3.92651e-12	1.12275e-10
151188	ARL6IP6	mRNA	148.93	358.94	1.2691	2.24771e-10	5.01927e-09
22837	COBLL1	mRNA	97.94	235.42	1.26536	9.6976e-09	1.72819e-07
666	BOK	mRNA	182.68	439.09	1.26523	1.82962e-11	4.69946e-10
11247	NXPH4	mRNA	142.72	342.88	1.26454	3.31581e-05	0.000283008
57514	ARHGAP31	mRNA	604.68	1452.6	1.26441	1.82259e-08	3.11931e-07
10964	IFI44L	mRNA	3652.81	8774.51	1.26431	2.28744e-05	0.000202611
55620	STAP2	mRNA	28.44	68.3	1.2637	0.0051882	0.0229587
23507	LRRC8B	mRNA	6.71	16.1	1.26341	0.158951	0.346002
100528030	POC1B-GALNT4	mRNA	13.28	31.87	1.26325	0.591098	0.8093
6491	STIL	mRNA	51.77	124.15	1.262	6.71114e-05	0.000528551
1465	CSRP1	mRNA	2478.32	5927.21	1.25799	1.12803e-15	5.0448e-14
54538	ROBO4	mRNA	18.05	43.12	1.25641	0.0584984	0.162459
6242	RTKN	mRNA	164.53	392.66	1.25495	1.40591e-06	1.63076e-05
4627	MYH9	mRNA	12822	30570.1	1.25349	9.84604e-19	5.91953e-17
1847	DUSP5	mRNA	657.47	1566.5	1.25255	5.16253e-08	8.07746e-07
8218	CLTCL1	mRNA	135.52	322.67	1.25154	3.9261e-06	4.13336e-05
83879	CDCA7	mRNA	6.88	16.37	1.25135	0.12499	0.290657
4650	MYO9B	mRNA	2409.46	5734.88	1.25106	9.48131e-12	2.5637e-10
1277	COL1A1	mRNA	26367.2	62708.5	1.24991	1.34903e-11	3.55404e-10
57578	UNC79	mRNA	8.15	19.36	1.24804	0.0631521	0.172383
5174	PDZK1	mRNA	2.47	5.87	1.24744	0.401631	0.648242
8851	CDK5R1	mRNA	20.09	47.68	1.24684	0.00580284	0.025163
64332	NFKBIZ	mRNA	1681.71	3989.89	1.24642	3.82533e-07	5.00679e-06
55601	DDX60	mRNA	1107.33	2619.78	1.24236	3.08318e-07	4.10749e-06
10186	LHFPL6	mRNA	1307.34	3090.76	1.24133	2.76378e-10	6.09702e-09
4791	NFKB2	mRNA	1382.27	3265.51	1.24027	0.000231528	0.00157028
7262	PHLDA2	mRNA	279.9	660.48	1.23862	2.76739e-05	0.000239816
5420	PODXL	mRNA	314.74	742.45	1.23815	0.013435	0.0505521
57512	GPR158	mRNA	5.72	13.49	1.23753	0.280354	0.515569
9353	SLIT2	mRNA	1714.3	4041.27	1.23719	2.86158e-06	3.10014e-05
222698	NKAPL	mRNA	42.49	100.13	1.23666	5.36902e-05	0.000434954
81894	SLC25A28	mRNA	541.67	1275.77	1.23589	2.11165e-09	4.126e-08
83666	PARP9	mRNA	2034.54	4790.27	1.2354	1.35546e-14	5.33506e-13
25902	MTHFD1L	mRNA	723.1	1701.3	1.23437	5.14434e-13	1.66866e-11
6480	ST6GAL1	mRNA	49.95	117.52	1.23436	0.000277375	0.00182981
116442	RAB39B	mRNA	2.84	6.67	1.23369	0.278024	0.513008
1519	CTSO	mRNA	750.78	1764.85	1.23309	1.00315e-07	1.45834e-06
343450	KCNT2	mRNA	14.93	35.08	1.23307	0.0939965	0.234605
65979	PHACTR4	mRNA	418.51	983.72	1.233	4.8396e-14	1.79711e-12
171024	SYNPO2	mRNA	172.51	405.46	1.23292	0.00694215	0.0292083
79841	AGBL2	mRNA	8.86	20.8	1.23186	0.0538271	0.152716
10257	ABCC4	mRNA	361.21	847.9	1.23106	0.000143518	0.00102652
79135	APOO	mRNA	96.78	227.19	1.23104	1.30058e-06	1.53021e-05
220108	FAM124A	mRNA	196.86	462	1.23074	1.68268e-05	0.000152753
283349	RASSF3	mRNA	326.59	765.94	1.22972	2.69463e-09	5.20931e-08
151306	GPBAR1	mRNA	2.53	5.93	1.22939	0.283997	0.519932
23526	ARHGAP45	mRNA	8.81	20.66	1.22927	0.171416	0.365717
4659	PPP1R12A	mRNA	898.37	2104.65	1.22819	7.21694e-20	4.77628e-18
80774	LIMD2	mRNA	169.5	397.01	1.22789	7.44626e-08	1.12022e-06
7920	ABHD16A	mRNA	645.13	1510.43	1.2273	9.96404e-09	1.77375e-07
11064	CNTRL	mRNA	57.15	133.72	1.22635	0.0007271	0.00425451
84790	TUBA1C	mRNA	2075.8	4856.22	1.22617	0.000260533	0.00173614
6102	RP2	mRNA	365.91	855.56	1.22541	1.92786e-11	4.93633e-10
162394	SLFN5	mRNA	4323.03	10104.7	1.22491	8.14271e-15	3.29991e-13
4008	LMO7	mRNA	772.13	1804.42	1.22462	0.000744841	0.00434129
8900	CCNA1	mRNA	0.61	1.43	1.22348	0.666043	0.855426
57147	SCYL3	mRNA	243.25	568	1.22347	3.89174e-13	1.2775e-11
1145	CHRNE	mRNA	6.68	15.58	1.22121	0.223908	0.441707
9567	GTPBP1	mRNA	1055.91	2459.16	1.21968	2.45013e-07	3.32621e-06
5696	PSMB8	mRNA	1626.69	3788.07	1.21952	4.2495e-13	1.38938e-11
90381	TICRR	mRNA	74.69	173.92	1.21942	0.0111991	0.0435881
58499	ZNF462	mRNA	357.93	832.72	1.21814	6.99004e-09	1.28044e-07
8840	CCN4	mRNA	741.26	1721.54	1.21566	0.000270679	0.00179607
9473	THEMIS2	mRNA	369.15	857	1.21511	7.6273e-11	1.8143e-09
285051	STPG4	mRNA	0.61	1.42	1.21439	0.66865	0.855783
3036	HAS1	mRNA	1849.28	4288.45	1.2135	6.01024e-05	0.00047933
203068	TUBB	mRNA	9417.76	21838.9	1.21344	9.10471e-08	1.33663e-06
1827	RCAN1	mRNA	2558.05	5927.7	1.21243	2.30304e-06	2.55231e-05
91056	AP5B1	mRNA	654.62	1516.84	1.21234	2.13165e-05	0.000189939
11054	OGFR	mRNA	1150.97	2657.96	1.20748	3.85667e-08	6.21192e-07
1118	CHIT1	mRNA	0.61	1.4	1.20619	0.726563	0.890662
11120	BTN2A1	mRNA	1357.66	3132.14	1.20602	1.35331e-18	8.1065e-17
55752	SEPTIN11	mRNA	2434.89	5616.72	1.20587	2.55911e-13	8.62478e-12
27242	TNFRSF21	mRNA	433.5	997.93	1.20291	0.000477175	0.00294321
3126	HLA-DRB4	mRNA	78.03	179.59	1.20256	0.0422055	0.126648
79132	DHX58	mRNA	428.22	985.43	1.2024	9.84672e-05	0.000736619
55658	RNF126	mRNA	324.59	746.93	1.20233	2.35562e-08	3.95325e-07
661	POLR3D	mRNA	251.69	579.04	1.20204	0.0012721	0.00690677
7051	TGM1	mRNA	3.51	8.08	1.20194	0.236445	0.458449
386617	KCTD8	mRNA	0.92	2.11	1.20149	0.573176	0.794959
29106	SCG3	mRNA	1.24	2.85	1.20013	0.54824	0.779893
1266	CNN3	mRNA	1664.25	3820.93	1.19905	1.74158e-07	2.4348e-06
9129	PRPF3	mRNA	425.75	977.4	1.19894	8.22225e-10	1.70394e-08
5069	PAPPA	mRNA	5479	12570.3	1.19803	9.8417e-06	9.46291e-05
219790	RTKN2	mRNA	14.57	33.39	1.19695	0.0815005	0.209452
5464	PPA1	mRNA	1186.7	2717.3	1.19521	2.68056e-08	4.43956e-07
5795	PTPRJ	mRNA	521.1	1192.75	1.19467	7.15957e-13	2.28619e-11
85415	RHPN2	mRNA	16.08	36.78	1.1936	0.0100899	0.0399365
285601	GPR150	mRNA	7.5	17.15	1.19348	0.106706	0.258504
10406	WFDC2	mRNA	20.38	46.59	1.19246	0.0541306	0.153312
126731	CCSAP	mRNA	106.89	244.26	1.19226	1.29802e-07	1.84454e-06
9662	CEP135	mRNA	102.07	233.07	1.19117	8.592e-08	1.26989e-06
5292	PIM1	mRNA	396.34	903.91	1.18944	4.17981e-07	5.40609e-06
23673	STX12	mRNA	848.21	1933.63	1.18882	2.56398e-15	1.09022e-13
10133	OPTN	mRNA	4063.25	9261.84	1.18866	3.14318e-19	1.95413e-17
4430	MYO1B	mRNA	6827.78	15561.9	1.18853	4.73503e-07	6.07156e-06
65267	WNK3	mRNA	52.7	120.07	1.18795	7.05234e-05	0.000551453
64167	ERAP2	mRNA	1626.1	3702.42	1.18705	0.435161	0.679507
51301	GCNT4	mRNA	21.61	49.2	1.18704	0.0210681	0.0730383
7360	UGP2	mRNA	3625.56	8251.78	1.1865	1.6216e-19	1.03561e-17
406	ARNTL	mRNA	304.6	693.21	1.18638	7.14716e-08	1.07918e-06
345651	ACTBL2	mRNA	0.61	1.39	1.18618	0.623742	0.826413
3166	HMX1	mRNA	3.8	8.62	1.18305	0.459564	0.703163
112268350	LOC112268350	mRNA	0.61	1.38	1.18288	0.672787	0.8572
92591	ASB16	mRNA	0.63	1.43	1.18244	0.629646	0.830337
2494	NR5A2	mRNA	0.61	1.38	1.18134	0.678154	0.858309
10544	PROCR	mRNA	2352.53	5331.86	1.18042	2.81048e-06	3.06298e-05
2358	FPR2	mRNA	8.21	18.57	1.17757	0.0992886	0.244725
7444	VRK2	mRNA	545.41	1233.64	1.17753	5.28684e-09	9.90558e-08
340307	CTAGE6	mRNA	0.64	1.44	1.17742	0.731153	0.894152
54102	CLIC6	mRNA	598.02	1352.54	1.17739	0.00118307	0.00648556
79814	AGMAT	mRNA	13.04	29.49	1.17677	0.0648586	0.175741
22856	CHSY1	mRNA	1073.9	2427.26	1.17647	2.05141e-09	4.01788e-08
4038	LRP4	mRNA	226.56	511.87	1.17588	1.82344e-05	0.000164803
5129	CDK18	mRNA	56.68	128.04	1.17562	0.00379304	0.0175614
11069	RAPGEF4	mRNA	14.07	31.79	1.17553	0.0592349	0.164144
65989	DLK2	mRNA	0.62	1.41	1.17539	0.585308	0.804592
102723750	LOC102723750	mRNA	1.59	3.59	1.17457	0.620849	0.825074
7082	TJP1	mRNA	1118.34	2520.71	1.17247	1.82331e-15	7.89602e-14
2894	GRID1	mRNA	0.94	2.12	1.17178	0.530091	0.763593
685	BTC	mRNA	128.35	288.86	1.17024	0.00171904	0.00895701
63976	PRDM16	mRNA	36.49	82.09	1.16991	0.00751539	0.0312754
2042	EPHA3	mRNA	19.02	42.79	1.16978	0.10993	0.264208
147670	SMIM17	mRNA	1.88	4.23	1.16953	0.363645	0.609592
5733	PTGER3	mRNA	1.56	3.5	1.16946	0.398342	0.645033
134285	TMEM171	mRNA	378.67	851.62	1.16928	1.11738e-05	0.000106071
84879	MFSD2A	mRNA	264.83	595.58	1.16922	2.43335e-05	0.000214033
1001	CDH3	mRNA	0.62	1.4	1.16906	0.587473	0.806473
8811	GALR2	mRNA	0.95	2.13	1.16889	0.507162	0.745615
5817	PVR	mRNA	818.34	1839.77	1.16875	6.36595e-15	2.62524e-13
6866	TAC3	mRNA	1.27	2.84	1.16744	0.459185	0.70278
7429	VIL1	mRNA	1.89	4.25	1.16566	0.381843	0.630883
254228	CALHM5	mRNA	152.64	342.24	1.16485	1.13235e-06	1.3497e-05
9775	EIF4A3	mRNA	988.5	2215.77	1.16449	1.60885e-08	2.76503e-07
91663	MYADM	mRNA	1288.66	2886.45	1.16343	1.01326e-08	1.79791e-07
400224	PLEKHD1	mRNA	1.58	3.54	1.1632	0.421846	0.665746
7145	TNS1	mRNA	5390.94	12071.3	1.16297	1.71694e-06	1.95967e-05
10384	BTN3A3	mRNA	1557.43	3485.96	1.16239	2.42269e-07	3.29441e-06
2134	EXTL1	mRNA	0.64	1.42	1.16223	0.676512	0.857396
320	APBA1	mRNA	150.26	336.03	1.16112	0.000725084	0.00424423
54207	KCNK10	mRNA	0.62	1.39	1.16104	0.590214	0.808545
284339	TMEM145	mRNA	0.95	2.13	1.16102	0.596241	0.8128
80975	TMPRSS5	mRNA	0.95	2.13	1.16102	0.596241	0.8128
126014	OSCAR	mRNA	13.26	29.6	1.15882	0.0371131	0.114392
54517	PUS7	mRNA	190.26	424.66	1.15831	1.51469e-08	2.61967e-07
79816	TLE6	mRNA	0.64	1.43	1.15823	0.636329	0.834424
85444	LRRCC1	mRNA	42.23	94.09	1.15579	0.0029518	0.0141951
6925	TCF4	mRNA	1516.47	3378.18	1.15553	4.92765e-08	7.75432e-07
54734	RAB39A	mRNA	1.57	3.51	1.15533	0.464999	0.708601
3780	KCNN1	mRNA	0.62	1.38	1.15527	0.632616	0.831942
6285	S100B	mRNA	0.64	1.42	1.15494	0.68346	0.860578
8448	DOC2A	mRNA	0.64	1.42	1.15494	0.68346	0.860578
10459	MAD2L2	mRNA	127.79	284.5	1.15472	0.000201002	0.00138557
26037	SIPA1L1	mRNA	667.39	1485.6	1.15444	1.17086e-08	2.05753e-07
51015	ISOC1	mRNA	99.16	220.69	1.15427	8.49919e-07	1.04258e-05
9636	ISG15	mRNA	2842.99	6326.06	1.1539	0.000603014	0.00360425
114788	CSMD3	mRNA	0.64	1.41	1.15365	0.632234	0.831942
1138	CHRNA5	mRNA	3.46	7.71	1.15355	0.228022	0.447456
132228	LSMEM2	mRNA	0.63	1.4	1.15319	0.638878	0.835863
147339	C18orf25	mRNA	390.84	868.87	1.15255	5.35745e-14	1.97157e-12
644186	SYCE3	mRNA	1.27	2.82	1.15221	0.442338	0.686797
100286986	LOC100286986	mRNA	0.64	1.42	1.15155	0.632483	0.831942
55917	CTTNBP2NL	mRNA	772.49	1714.18	1.14994	4.75096e-13	1.55025e-11
23228	PLCL2	mRNA	253.19	561.65	1.14948	4.23288e-06	4.40827e-05
9108	MTMR7	mRNA	3.52	7.8	1.149	0.327883	0.571289
163859	SDE2	mRNA	318.88	706.69	1.14807	4.14263e-13	1.35714e-11
63916	ELMO2	mRNA	867.62	1921.81	1.14732	5.26468e-10	1.1222e-08
6675	UAP1	mRNA	1831.99	4057.37	1.14714	2.32065e-09	4.51824e-08
29970	SCHIP1	mRNA	143.82	318.52	1.14714	2.14312e-06	2.38799e-05
3574	IL7	mRNA	65.73	145.46	1.14597	0.000459942	0.00285299
6541	SLC7A1	mRNA	1563.37	3458.13	1.14533	0.00020138	0.0013876
164592	CCDC116	mRNA	0.64	1.42	1.14466	0.594568	0.811867
89874	SLC25A21	mRNA	0.64	1.42	1.14466	0.594568	0.811867
8780	RIOK3	mRNA	1262.99	2792.01	1.14446	6.14465e-12	1.70936e-10
283212	KLHL35	mRNA	27.29	60.25	1.14282	0.0174954	0.0628477
57586	SYT13	mRNA	0.63	1.38	1.14266	0.642201	0.839021
9644	SH3PXD2A	mRNA	3785.18	8356.05	1.14246	0.00154043	0.00815319
23210	JMJD6	mRNA	628.4	1386.51	1.14169	2.0251e-06	2.27191e-05
55707	NECAP2	mRNA	685.99	1512.69	1.14085	1.61851e-16	7.8131e-15
9246	UBE2L6	mRNA	3060.56	6745.4	1.14011	2.10613e-11	5.37603e-10
8128	ST8SIA2	mRNA	1.9	4.19	1.13966	0.464597	0.708278
100130827	SBK3	mRNA	2.55	5.63	1.13957	0.326797	0.570122
159013	CXorf38	mRNA	159.21	350.55	1.13867	1.07899e-07	1.55619e-06
27255	CNTN6	mRNA	0.63	1.4	1.1382	0.637184	0.834911
6954	TCP11	mRNA	0.63	1.4	1.1382	0.637184	0.834911
57110	PLAAT1	mRNA	1.59	3.5	1.13817	0.442138	0.686612
7462	LAT2	mRNA	8.56	18.84	1.13763	0.114285	0.271849
84433	CARD11	mRNA	0.63	1.38	1.1357	0.644407	0.840313
51633	OTUD6B	mRNA	106.03	232.95	1.13552	2.93107e-06	3.17124e-05
9958	USP15	mRNA	758.2	1665.38	1.13519	1.27928e-15	5.64432e-14
60	ACTB	mRNA	38862.1	85349.7	1.13502	1.94495e-06	2.19398e-05
195828	ZNF367	mRNA	33.71	74.03	1.13479	0.101938	0.249718
10256	CNKSR1	mRNA	0.97	2.13	1.13359	0.594763	0.811998
164284	APCDD1L	mRNA	2662.64	5840.67	1.13328	0.000302057	0.00196537
79931	TNIP3	mRNA	181.96	399.05	1.13298	1.94919e-05	0.00017482
3455	IFNAR2	mRNA	618.78	1355.36	1.13117	0.000310139	0.00201259
10527	IPO7	mRNA	2375.94	5202.28	1.13065	6.38041e-09	1.17665e-07
23220	DTX4	mRNA	65.38	143.08	1.12994	0.00162309	0.00852202
221914	GPC2	mRNA	6.34	13.88	1.12982	0.276558	0.511166
55559	HAUS7	mRNA	35.64	77.99	1.12963	0.00312491	0.0148967
51371	POMP	mRNA	1577.98	3452.65	1.12962	4.30355e-12	1.22416e-10
128178	EDARADD	mRNA	3.18	6.95	1.12793	0.317818	0.559993
25939	SAMHD1	mRNA	2416.11	5276.89	1.127	1.26567e-08	2.21465e-07
1140	CHRNB1	mRNA	49.6	108.25	1.12595	0.0064018	0.0273129
55177	RMDN3	mRNA	607.85	1326.21	1.12552	4.79607e-08	7.56902e-07
90627	STARD13	mRNA	1268.69	2767.43	1.1252	2.4765e-13	8.3808e-12
9462	RASAL2	mRNA	720.5	1570.99	1.12461	1.65636e-14	6.45744e-13
221710	SMIM13	mRNA	222.12	484.26	1.12446	3.81388e-09	7.21998e-08
57718	PPP4R4	mRNA	273.71	595.19	1.12069	1.09896e-08	1.93949e-07
9351	SLC9A3R2	mRNA	286.07	621.96	1.12045	1.31014e-09	2.62556e-08
57678	GPAM	mRNA	124.64	270.81	1.11948	0.000393121	0.00248261
11149	BVES	mRNA	551.07	1196.8	1.11887	1.41322e-11	3.6994e-10
8807	IL18RAP	mRNA	0.64	1.39	1.11842	0.648931	0.843788
285429	DCAF4L1	mRNA	0.96	2.09	1.11835	0.603087	0.817177
88455	ANKRD13A	mRNA	429.65	932.51	1.11797	1.54817e-06	1.77748e-05
57648	KIAA1522	mRNA	499.93	1084.78	1.1176	1.21449e-09	2.44883e-08
100131303	DPEP2NB	mRNA	0.11	0.25	1.11682	0.784317	0.910267
100190949	C5orf52	mRNA	0.11	0.25	1.11682	0.784317	0.910267
10045	SH2D3A	mRNA	0.11	0.25	1.11682	0.784317	0.910267
100506540	SPTY2D1OS	mRNA	0.11	0.23	1.11682	0.784317	0.910267
100507096	GIMD1	mRNA	0.11	0.23	1.11682	0.784317	0.910267
100527943	TGIF2-RAB5IF	mRNA	0.11	0.25	1.11682	0.784317	0.910267
100528064	NEDD8-MDP1	mRNA	0.11	0.24	1.11682	0.784317	0.910267
10089	KCNK7	mRNA	0.11	0.24	1.11682	0.784317	0.910267
100996746	SPDYE11	mRNA	0.11	0.24	1.11682	0.784317	0.910267
105376341	LOC105376341	mRNA	0.11	0.25	1.11682	0.784317	0.910267
10563	CXCL13	mRNA	0.11	0.23	1.11682	0.784317	0.910267
10738	RFPL3	mRNA	0.11	0.24	1.11682	0.784317	0.910267
10761	PLAC1	mRNA	0.11	0.25	1.11682	0.784317	0.910267
107984153	LOC107984153	mRNA	0.11	0.25	1.11682	0.784317	0.910267
107984264	LOC107984264	mRNA	0.11	0.25	1.11682	0.784317	0.910267
107984640	LBHD2	mRNA	0.11	0.24	1.11682	0.784317	0.910267
107984833	LOC107984833	mRNA	0.11	0.25	1.11682	0.784317	0.910267
107985729	LOC107985729	mRNA	0.11	0.25	1.11682	0.784317	0.910267
107987067	LOC107987067	mRNA	0.11	0.24	1.11682	0.784317	0.910267
107987462	LOC107987462	mRNA	0.11	0.23	1.11682	0.784317	0.910267
107987464	LOC107987464	mRNA	0.11	0.25	1.11682	0.784317	0.910267
107987477	LOC107987477	mRNA	0.11	0.25	1.11682	0.784317	0.910267
1087	CEACAM7	mRNA	0.11	0.25	1.11682	0.784317	0.910267
10913	EDAR	mRNA	0.11	0.24	1.11682	0.784317	0.910267
10990	LILRB5	mRNA	0.11	0.23	1.11682	0.784317	0.910267
11061	CNMD	mRNA	0.11	0.24	1.11682	0.784317	0.910267
11085	ADAM30	mRNA	0.11	0.25	1.11682	0.784317	0.910267
111064647	CSNKA2IP	mRNA	0.11	0.25	1.11682	0.784317	0.910267
112267897	LOC112267897	mRNA	0.11	0.24	1.11682	0.784317	0.910267
112267904	LOC112267904	mRNA	0.11	0.25	1.11682	0.784317	0.910267
112268387	LOC112268387	mRNA	0.11	0.24	1.11682	0.784317	0.910267
112268395	LOC112268395	mRNA	0.11	0.24	1.11682	0.784317	0.910267
112577592	LOC112577592	mRNA	0.11	0.25	1.11682	0.784317	0.910267
11283	CYP4F8	mRNA	0.11	0.24	1.11682	0.784317	0.910267
113828	FAM83F	mRNA	0.11	0.23	1.11682	0.784317	0.910267
114335	CGB1	mRNA	0.11	0.23	1.11682	0.784317	0.910267
114786	XKR4	mRNA	0.11	0.23	1.11682	0.784317	0.910267
116135	LRRC3B	mRNA	0.11	0.23	1.11682	0.784317	0.910267
116179	TGM7	mRNA	0.11	0.24	1.11682	0.784317	0.910267
116285	ACSM1	mRNA	0.11	0.25	1.11682	0.784317	0.910267
116448	OLIG1	mRNA	0.11	0.24	1.11682	0.784317	0.910267
116512	MRGPRD	mRNA	0.11	0.23	1.11682	0.784317	0.910267
117196	MRGPRX4	mRNA	0.11	0.25	1.11682	0.784317	0.910267
120071	LARGE2	mRNA	0.11	0.24	1.11682	0.784317	0.910267
121340	SP7	mRNA	0.11	0.25	1.11682	0.784317	0.910267
122042	RXFP2	mRNA	0.11	0.23	1.11682	0.784317	0.910267
123624	AGBL1	mRNA	0.11	0.25	1.11682	0.784317	0.910267
124590	USH1G	mRNA	0.11	0.25	1.11682	0.784317	0.910267
124602	KIF19	mRNA	0.11	0.25	1.11682	0.784317	0.910267
125965	COX6B2	mRNA	0.11	0.25	1.11682	0.784317	0.910267
127833	SYT2	mRNA	0.11	0.25	1.11682	0.784317	0.910267
128025	WDR64	mRNA	0.11	0.24	1.11682	0.784317	0.910267
13	AADAC	mRNA	0.11	0.23	1.11682	0.784317	0.910267
130013	ACMSD	mRNA	0.11	0.23	1.11682	0.784317	0.910267
134864	TAAR1	mRNA	0.11	0.23	1.11682	0.784317	0.910267
135886	TMEM270	mRNA	0.11	0.24	1.11682	0.784317	0.910267
137868	SGCZ	mRNA	0.11	0.23	1.11682	0.784317	0.910267
138255	C9orf135	mRNA	0.11	0.24	1.11682	0.784317	0.910267
139411	PTCHD1	mRNA	0.11	0.24	1.11682	0.784317	0.910267
140456	ASB11	mRNA	0.11	0.25	1.11682	0.784317	0.910267
140628	GATA5	mRNA	0.11	0.23	1.11682	0.784317	0.910267
140902	R3HDML	mRNA	0.11	0.25	1.11682	0.784317	0.910267
1472	CST4	mRNA	0.11	0.23	1.11682	0.784317	0.910267
147407	SLC25A52	mRNA	0.11	0.23	1.11682	0.784317	0.910267
153579	BTNL9	mRNA	0.11	0.25	1.11682	0.784317	0.910267
158763	ARHGAP36	mRNA	0.11	0.23	1.11682	0.784317	0.910267
161514	TBC1D21	mRNA	0.11	0.24	1.11682	0.784317	0.910267
164127	CCDC185	mRNA	0.11	0.23	1.11682	0.784317	0.910267
166863	RBM46	mRNA	0.11	0.25	1.11682	0.784317	0.910267
169966	TENT5D	mRNA	0.11	0.23	1.11682	0.784317	0.910267
170575	GIMAP1	mRNA	0.11	0.23	1.11682	0.784317	0.910267
1812	DRD1	mRNA	0.11	0.24	1.11682	0.784317	0.910267
1826	DSCAM	mRNA	0.11	0.25	1.11682	0.784317	0.910267
1828	DSG1	mRNA	0.11	0.25	1.11682	0.784317	0.910267
1990	CELA1	mRNA	0.11	0.25	1.11682	0.784317	0.910267
1995	ELAVL3	mRNA	0.11	0.24	1.11682	0.784317	0.910267
201780	SLC10A4	mRNA	0.11	0.23	1.11682	0.784317	0.910267
202134	FAM153B	mRNA	0.11	0.25	1.11682	0.784317	0.910267
2041	EPHA1	mRNA	0.11	0.24	1.11682	0.784317	0.910267
221391	OPN5	mRNA	0.11	0.23	1.11682	0.784317	0.910267
222662	LHFPL5	mRNA	0.11	0.23	1.11682	0.784317	0.910267
22806	IKZF3	mRNA	0.11	0.25	1.11682	0.784317	0.910267
2304	FOXE1	mRNA	0.11	0.24	1.11682	0.784317	0.910267
23553	HYAL4	mRNA	0.11	0.25	1.11682	0.784317	0.910267
240	ALOX5	mRNA	0.11	0.25	1.11682	0.784317	0.910267
246	ALOX15	mRNA	0.11	0.24	1.11682	0.784317	0.910267
2529	FUT7	mRNA	0.11	0.24	1.11682	0.784317	0.910267
256380	SCML4	mRNA	0.11	0.25	1.11682	0.784317	0.910267
256710	GLIPR1L1	mRNA	0.11	0.25	1.11682	0.784317	0.910267
258	AMBN	mRNA	0.11	0.25	1.11682	0.784317	0.910267
259292	TAS2R46	mRNA	0.11	0.24	1.11682	0.784317	0.910267
259308	FAM205A	mRNA	0.11	0.24	1.11682	0.784317	0.910267
26211	OR2F1	mRNA	0.11	0.23	1.11682	0.784317	0.910267
26257	NKX2-8	mRNA	0.11	0.24	1.11682	0.784317	0.910267
26281	FGF20	mRNA	0.11	0.25	1.11682	0.784317	0.910267
26330	GAPDHS	mRNA	0.11	0.25	1.11682	0.784317	0.910267
266743	NPAS4	mRNA	0.11	0.23	1.11682	0.784317	0.910267
267020	ATP5MGL	mRNA	0.11	0.23	1.11682	0.784317	0.910267
2702	GJA5	mRNA	0.11	0.23	1.11682	0.784317	0.910267
27065	NSG1	mRNA	0.11	0.24	1.11682	0.784317	0.910267
27121	DKK4	mRNA	0.11	0.25	1.11682	0.784317	0.910267
27127	SMC1B	mRNA	0.11	0.23	1.11682	0.784317	0.910267
27134	TJP3	mRNA	0.11	0.25	1.11682	0.784317	0.910267
27165	GLS2	mRNA	0.11	0.23	1.11682	0.784317	0.910267
27296	TP53TG5	mRNA	0.11	0.24	1.11682	0.784317	0.910267
282618	IFNL1	mRNA	0.11	0.24	1.11682	0.784317	0.910267
282763	OR51B5	mRNA	0.11	0.25	1.11682	0.784317	0.910267
283446	MYO1H	mRNA	0.11	0.24	1.11682	0.784317	0.910267
283652	SLC24A5	mRNA	0.11	0.23	1.11682	0.784317	0.910267
284110	GSDMA	mRNA	0.11	0.23	1.11682	0.784317	0.910267
284485	RIIAD1	mRNA	0.11	0.25	1.11682	0.784317	0.910267
284486	THEM5	mRNA	0.11	0.23	1.11682	0.784317	0.910267
2849	GPR26	mRNA	0.11	0.23	1.11682	0.784317	0.910267
285242	HTR3E	mRNA	0.11	0.23	1.11682	0.784317	0.910267
285782	CAGE1	mRNA	0.11	0.25	1.11682	0.784317	0.910267
2864	FFAR1	mRNA	0.11	0.24	1.11682	0.784317	0.910267
2904	GRIN2B	mRNA	0.11	0.24	1.11682	0.784317	0.910267
29114	TAGLN3	mRNA	0.11	0.25	1.11682	0.784317	0.910267
29119	CTNNA3	mRNA	0.11	0.25	1.11682	0.784317	0.910267
29124	LGALS13	mRNA	0.11	0.23	1.11682	0.784317	0.910267
2914	GRM4	mRNA	0.11	0.25	1.11682	0.784317	0.910267
2984	GUCY2C	mRNA	0.11	0.23	1.11682	0.784317	0.910267
2986	GUCY2F	mRNA	0.11	0.25	1.11682	0.784317	0.910267
2994	GYPB	mRNA	0.11	0.24	1.11682	0.784317	0.910267
3003	GZMK	mRNA	0.11	0.24	1.11682	0.784317	0.910267
3120	HLA-DQB2	mRNA	0.11	0.24	1.11682	0.784317	0.910267
3171	FOXA3	mRNA	0.11	0.25	1.11682	0.784317	0.910267
3219	HOXB9	mRNA	0.11	0.23	1.11682	0.784317	0.910267
338599	DUSP29	mRNA	0.11	0.24	1.11682	0.784317	0.910267
339302	CPLX4	mRNA	0.11	0.24	1.11682	0.784317	0.910267
339403	RXFP4	mRNA	0.11	0.23	1.11682	0.784317	0.910267
339967	TMPRSS11A	mRNA	0.11	0.25	1.11682	0.784317	0.910267
339976	TRIML1	mRNA	0.11	0.24	1.11682	0.784317	0.910267
340069	FAM170A	mRNA	0.11	0.25	1.11682	0.784317	0.910267
341947	COX8C	mRNA	0.11	0.24	1.11682	0.784317	0.910267
342574	KRT27	mRNA	0.11	0.24	1.11682	0.784317	0.910267
343702	XKR7	mRNA	0.11	0.24	1.11682	0.784317	0.910267
346689	KLRG2	mRNA	0.11	0.24	1.11682	0.784317	0.910267
347169	OR1B1	mRNA	0.11	0.25	1.11682	0.784317	0.910267
348378	SHISAL2A	mRNA	0.11	0.24	1.11682	0.784317	0.910267
350	APOH	mRNA	0.11	0.23	1.11682	0.784317	0.910267
353149	TBC1D26	mRNA	0.11	0.24	1.11682	0.784317	0.910267
3567	IL5	mRNA	0.11	0.25	1.11682	0.784317	0.910267
3577	CXCR1	mRNA	0.11	0.24	1.11682	0.784317	0.910267
3579	CXCR2	mRNA	0.11	0.24	1.11682	0.784317	0.910267
3596	IL13	mRNA	0.11	0.25	1.11682	0.784317	0.910267
361	AQP4	mRNA	0.11	0.25	1.11682	0.784317	0.910267
3640	INSL3	mRNA	0.11	0.23	1.11682	0.784317	0.910267
373509	USP50	mRNA	0.11	0.25	1.11682	0.784317	0.910267
3743	KCNA7	mRNA	0.11	0.25	1.11682	0.784317	0.910267
3746	KCNC1	mRNA	0.11	0.25	1.11682	0.784317	0.910267
374864	CCDC178	mRNA	0.11	0.25	1.11682	0.784317	0.910267
374877	TEX45	mRNA	0.11	0.25	1.11682	0.784317	0.910267
375607	NAT16	mRNA	0.11	0.24	1.11682	0.784317	0.910267
3773	KCNJ16	mRNA	0.11	0.23	1.11682	0.784317	0.910267
378925	RNF148	mRNA	0.11	0.25	1.11682	0.784317	0.910267
3817	KLK2	mRNA	0.11	0.24	1.11682	0.784317	0.910267
387694	SH2D4B	mRNA	0.11	0.24	1.11682	0.784317	0.910267
387707	CC2D2B	mRNA	0.11	0.25	1.11682	0.784317	0.910267
388323	GLTPD2	mRNA	0.11	0.24	1.11682	0.784317	0.910267
388555	IGFL3	mRNA	0.11	0.25	1.11682	0.784317	0.910267
388939	PCARE	mRNA	0.11	0.25	1.11682	0.784317	0.910267
389384	BNIP5	mRNA	0.11	0.25	1.11682	0.784317	0.910267
389766	C9orf153	mRNA	0.11	0.24	1.11682	0.784317	0.910267
3906	LALBA	mRNA	0.11	0.24	1.11682	0.784317	0.910267
392862	GRID2IP	mRNA	0.11	0.23	1.11682	0.784317	0.910267
4014	LORICRIN	mRNA	0.11	0.25	1.11682	0.784317	0.910267
401551	WDR38	mRNA	0.11	0.25	1.11682	0.784317	0.910267
401934	RNF223	mRNA	0.11	0.23	1.11682	0.784317	0.910267
405753	DUOXA2	mRNA	0.11	0.25	1.11682	0.784317	0.910267
414157	C10orf62	mRNA	0.11	0.24	1.11682	0.784317	0.910267
4142	MAS1	mRNA	0.11	0.25	1.11682	0.784317	0.910267
440163	RNASE13	mRNA	0.11	0.25	1.11682	0.784317	0.910267
440695	ETV3L	mRNA	0.11	0.23	1.11682	0.784317	0.910267
441521	CT45A5	mRNA	0.11	0.23	1.11682	0.784317	0.910267
4618	MYF6	mRNA	0.11	0.23	1.11682	0.784317	0.910267
4753	NELL2	mRNA	0.11	0.23	1.11682	0.784317	0.910267
4760	NEUROD1	mRNA	0.11	0.25	1.11682	0.784317	0.910267
4808	NHLH2	mRNA	0.11	0.24	1.11682	0.784317	0.910267
4879	NPPB	mRNA	0.11	0.24	1.11682	0.784317	0.910267
5047	PAEP	mRNA	0.11	0.24	1.11682	0.784317	0.910267
51087	YBX2	mRNA	0.11	0.25	1.11682	0.784317	0.910267
51225	ABI3	mRNA	0.11	0.23	1.11682	0.784317	0.910267
51284	TLR7	mRNA	0.11	0.24	1.11682	0.784317	0.910267
51348	KLRF1	mRNA	0.11	0.23	1.11682	0.784317	0.910267
5149	PDE6H	mRNA	0.11	0.23	1.11682	0.784317	0.910267
51751	HIGD1B	mRNA	0.11	0.25	1.11682	0.784317	0.910267
53842	CLDN22	mRNA	0.11	0.24	1.11682	0.784317	0.910267
54361	WNT4	mRNA	0.11	0.24	1.11682	0.784317	0.910267
5453	POU3F1	mRNA	0.11	0.24	1.11682	0.784317	0.910267
54578	UGT1A6	mRNA	0.11	0.24	1.11682	0.784317	0.910267
54754	NUTM2F	mRNA	0.11	0.23	1.11682	0.784317	0.910267
54845	ESRP1	mRNA	0.11	0.25	1.11682	0.784317	0.910267
54848	ARHGEF38	mRNA	0.11	0.25	1.11682	0.784317	0.910267
5539	PPY	mRNA	0.11	0.24	1.11682	0.784317	0.910267
55423	SIRPG	mRNA	0.11	0.23	1.11682	0.784317	0.910267
5551	PRF1	mRNA	0.11	0.25	1.11682	0.784317	0.910267
56158	TEX12	mRNA	0.11	0.25	1.11682	0.784317	0.910267
5624	PROC	mRNA	0.11	0.23	1.11682	0.784317	0.910267
563	AZGP1	mRNA	0.11	0.23	1.11682	0.784317	0.910267
56659	KCNK13	mRNA	0.11	0.25	1.11682	0.784317	0.910267
56891	LGALS14	mRNA	0.11	0.24	1.11682	0.784317	0.910267
56896	DPYSL5	mRNA	0.11	0.25	1.11682	0.784317	0.910267
56955	MEPE	mRNA	0.11	0.24	1.11682	0.784317	0.910267
57119	EPPIN	mRNA	0.11	0.25	1.11682	0.784317	0.910267
57282	SLC4A10	mRNA	0.11	0.25	1.11682	0.784317	0.910267
57495	NWD2	mRNA	0.11	0.25	1.11682	0.784317	0.910267
57662	CAMSAP3	mRNA	0.11	0.24	1.11682	0.784317	0.910267
5778	PTPN7	mRNA	0.11	0.24	1.11682	0.784317	0.910267
59285	CACNG6	mRNA	0.11	0.23	1.11682	0.784317	0.910267
59335	PRDM12	mRNA	0.11	0.24	1.11682	0.784317	0.910267
6013	RLN1	mRNA	0.11	0.25	1.11682	0.784317	0.910267
6036	RNASE2	mRNA	0.11	0.25	1.11682	0.784317	0.910267
6039	RNASE6	mRNA	0.11	0.23	1.11682	0.784317	0.910267
6346	CCL1	mRNA	0.11	0.24	1.11682	0.784317	0.910267
6370	CCL25	mRNA	0.11	0.25	1.11682	0.784317	0.910267
63973	NEUROG2	mRNA	0.11	0.23	1.11682	0.784317	0.910267
64377	CHST8	mRNA	0.11	0.25	1.11682	0.784317	0.910267
644974	ALG1L2	mRNA	0.11	0.24	1.11682	0.784317	0.910267
645745	MT1HL1	mRNA	0.11	0.25	1.11682	0.784317	0.910267
646424	SPINK8	mRNA	0.11	0.23	1.11682	0.784317	0.910267
64648	SPANXD	mRNA	0.11	0.24	1.11682	0.784317	0.910267
647219	ASCL5	mRNA	0.11	0.24	1.11682	0.784317	0.910267
64843	ISL2	mRNA	0.11	0.25	1.11682	0.784317	0.910267
649238	PNMA6E	mRNA	0.11	0.24	1.11682	0.784317	0.910267
6529	SLC6A1	mRNA	0.11	0.23	1.11682	0.784317	0.910267
653247	PRB2	mRNA	0.11	0.23	1.11682	0.784317	0.910267
654502	IQCJ	mRNA	0.11	0.23	1.11682	0.784317	0.910267
6718	AKR1D1	mRNA	0.11	0.25	1.11682	0.784317	0.910267
6898	TAT	mRNA	0.11	0.25	1.11682	0.784317	0.910267
6899	TBX1	mRNA	0.11	0.24	1.11682	0.784317	0.910267
696	BTN1A1	mRNA	0.11	0.25	1.11682	0.784317	0.910267
7143	TNR	mRNA	0.11	0.23	1.11682	0.784317	0.910267
7201	TRHR	mRNA	0.11	0.24	1.11682	0.784317	0.910267
7287	TULP1	mRNA	0.11	0.24	1.11682	0.784317	0.910267
729597	SPDYE6	mRNA	0.11	0.24	1.11682	0.784317	0.910267
7475	WNT6	mRNA	0.11	0.23	1.11682	0.784317	0.910267
7478	WNT8A	mRNA	0.11	0.24	1.11682	0.784317	0.910267
7634	ZNF80	mRNA	0.11	0.25	1.11682	0.784317	0.910267
766	CA7	mRNA	0.11	0.25	1.11682	0.784317	0.910267
7712	ZNF157	mRNA	0.11	0.24	1.11682	0.784317	0.910267
79012	CAMKV	mRNA	0.11	0.25	1.11682	0.784317	0.910267
796	CALCA	mRNA	0.11	0.23	1.11682	0.784317	0.910267
79679	VTCN1	mRNA	0.11	0.25	1.11682	0.784317	0.910267
79722	ANKRD55	mRNA	0.11	0.25	1.11682	0.784317	0.910267
79782	LRRC31	mRNA	0.11	0.25	1.11682	0.784317	0.910267
79785	RERGL	mRNA	0.11	0.24	1.11682	0.784317	0.910267
80070	ADAMTS20	mRNA	0.11	0.25	1.11682	0.784317	0.910267
80086	TUBA4B	mRNA	0.11	0.24	1.11682	0.784317	0.910267
80168	MOGAT2	mRNA	0.11	0.24	1.11682	0.784317	0.910267
80319	CXXC4	mRNA	0.11	0.25	1.11682	0.784317	0.910267
80740	LY6G6C	mRNA	0.11	0.23	1.11682	0.784317	0.910267
81030	ZBP1	mRNA	0.11	0.24	1.11682	0.784317	0.910267
81033	KCNH6	mRNA	0.11	0.24	1.11682	0.784317	0.910267
81616	ACSBG2	mRNA	0.11	0.23	1.11682	0.784317	0.910267
81832	NETO1	mRNA	0.11	0.23	1.11682	0.784317	0.910267
8350	H3C1	mRNA	0.11	0.24	1.11682	0.784317	0.910267
8355	H3C8	mRNA	0.11	0.25	1.11682	0.784317	0.910267
8356	H3C12	mRNA	0.11	0.25	1.11682	0.784317	0.910267
83697	SLC4A9	mRNA	0.11	0.23	1.11682	0.784317	0.910267
83723	TLCD3B	mRNA	0.11	0.24	1.11682	0.784317	0.910267
84636	GPR174	mRNA	0.11	0.25	1.11682	0.784317	0.910267
84658	ADGRE3	mRNA	0.11	0.25	1.11682	0.784317	0.910267
84659	RNASE7	mRNA	0.11	0.25	1.11682	0.784317	0.910267
84735	CNDP1	mRNA	0.11	0.23	1.11682	0.784317	0.910267
84891	ZSCAN10	mRNA	0.11	0.24	1.11682	0.784317	0.910267
84944	MAEL	mRNA	0.11	0.23	1.11682	0.784317	0.910267
85235	H2AC12	mRNA	0.11	0.24	1.11682	0.784317	0.910267
859	CAV3	mRNA	0.11	0.25	1.11682	0.784317	0.910267
9002	F2RL3	mRNA	0.11	0.23	1.11682	0.784317	0.910267
9027	NAT8	mRNA	0.11	0.24	1.11682	0.784317	0.910267
90737	PAGE5	mRNA	0.11	0.25	1.11682	0.784317	0.910267
9210	BMP15	mRNA	0.11	0.25	1.11682	0.784317	0.910267
926	CD8B	mRNA	0.11	0.23	1.11682	0.784317	0.910267
[truncated: 14,414 more rows]

## Sheet: KEGG UP
Category	Term	Count	%	PValue	List Total	Pop Hits	Pop Total	Fold Enrichment	Bonferroni	Benjamini	FDR	-log10 (q-value)	Genes
KEGG_PATHWAY	hsa04668:TNF signaling pathway	35	3.05944	2.94637e-13	587	119	8534	4.27598	9.66462e-11	9.66411e-11	7.77843e-11	10.1091	CSF2, CSF1, TNFAIP3, PIK3CD, NOD2, CXCL3, PTGS2, RELA, CXCL5, CX3CL1, ICAM1, SOCS3, CASP7, RPS6KA5, CASP10, CCL5, CCL2, JUNB, EDN1, MLKL, IL15, MMP3, RHBDF2, VEGFC, TRAF1, NFKBIA, CYLD, CXCL10, IL6, IRF1, IL1B, FAS, BIRC2, IL18R1, BIRC3
KEGG_PATHWAY	hsa05164:Influenza A	40	3.4965	1.89312e-11	587	173	8534	3.36146	6.20943e-09	3.10472e-09	2.49892e-09	8.60225	CIITA, CXCL8, PIK3CD, RELA, ACTB, ICAM1, IFIH1, SOCS3, HLA-DMA, HLA-DMB, CCL5, CASP1, TNFSF10, CCL2, NLRP3, IL12A, BAK1, JAK2, HLA-DOA, HLA-DOB, HLA-DQA1, IFNAR2, IL33, RSAD2, STAT2, PML, NFKBIA, IL1A, CXCL10, IL6, CDK6, OAS2, OAS3, IL1B, FAS, HLA-DRA, MYD88, HLA-DRB1, TLR3, HLA-DQB1
KEGG_PATHWAY	hsa04060:Cytokine-cytokine receptor interaction	53	4.63287	2.38678e-10	587	298	8534	2.58568	7.82862e-08	2.60954e-08	2.10036e-08	7.67771	CSF3, CXCL9, CD40, BMPR2, CSF2, CXCL8, CSF1, CXCL3, CXCL5, CX3CL1, TNFSF13B, TNFSF10, IL12A, CCR7, IFNAR2, IL11, IL15RA, TNFRSF12A, IL15, NGF, PRLR, TGFBR1, IL1A, IFNE, IL1B, IL3RA, TNFRSF21, CSF1R, EBI3, IL1RL1, CCL8, CCL7, CCL5, CCL3, CCL2, IL12RB1, RELT, IL32, NGFR, IL33, IL10RA, IL31RA, INHBA, IL22RA1, CXCL10, BMP2, CXCL11, IL6, IL7, ACKR3, FAS, IL7R, IL18R1
KEGG_PATHWAY	hsa05168:Herpes simplex virus 1 infection	38	3.32168	1.4324e-09	587	182	8534	3.03548	4.69829e-07	1.17457e-07	9.45387e-08	7.02439	PIK3CD, CGAS, ZC3HAV1, RELA, IFIH1, SOCS3, HLA-DMA, HLA-DMB, CCL5, CCL2, IL12A, BAK1, JAK2, HLA-DOA, HLA-DOB, HLA-DQA1, IFNAR2, CD74, STAT2, TAP2, TAP1, PILRA, POU2F2, PML, NFKBIA, IL6, OAS2, OAS3, IL1B, FAS, HLA-DRA, MYD88, BIRC2, HLA-DRB1, TLR3, BIRC3, HLA-DQB1, TLR2
KEGG_PATHWAY	hsa05323:Rheumatoid arthritis	26	2.27273	2.9004e-09	587	95	8534	3.97891	9.51329e-07	1.90266e-07	1.53141e-07	6.81491	CSF2, CXCL8, CSF1, CXCL3, CXCL5, TNFSF13B, ICAM1, HLA-DMA, HLA-DMB, CCL5, CCL3, CCL2, HLA-DOA, HLA-DOB, HLA-DQA1, IL11, IL15, MMP3, VEGFA, IL1A, IL6, IL1B, HLA-DRA, HLA-DRB1, HLA-DQB1, TLR2
KEGG_PATHWAY	hsa05200:Pathways in cancer	72	6.29371	2.80043e-08	587	533	8534	1.9639	9.18537e-06	1.5309e-06	1.23219e-06	5.90932	ALK, CXCL8, SLC2A1, PIK3CD, FGF1, ETS1, FGF2, CASP7, EDNRA, RPS6KA5, CCND1, RASSF5, PIM1, IL12A, PIM2, JAK2, JAK3, NKX3-1, IFNAR2, IL15RA, EDN1, IL15, NCOA3, ITGA2, WNT5A, TRAF1, WNT9A, TGFBR1, RUNX1, PLCB4, COL4A2, COL4A1, IL3RA, CKS2, BIRC2, BIRC3, CSF1R, RALA, NOTCH1, LEF1, PDGFB, PDGFA, TGFA, PTGS2, RASGRP1, HIF1A, FOXO1, RELA, STAT4, PMAIP1, BAK1, IL12RB1, WNT2, NTRK1, STAT5A, GADD45B, NOS2,…
KEGG_PATHWAY	hsa04640:Hematopoietic cell lineage	25	2.18531	4.26231e-08	587	100	8534	3.63458	1.39803e-05	1.98693e-06	1.59924e-06	5.79609	CSF1R, CSF3, CSF2, CSF1, HLA-DMA, HLA-DMB, CD38, HLA-DOA, HLA-DOB, HLA-DQA1, IL11, ITGA2, ITGA1, GP1BA, IL1A, IL6, CR1L, IL7, IL1B, IL3RA, HLA-DRA, CD24, IL7R, HLA-DRB1, HLA-DQB1
KEGG_PATHWAY	hsa05321:Inflammatory bowel disease	20	1.74825	4.84617e-08	587	66	8534	4.40555	1.58953e-05	1.98693e-06	1.59924e-06	5.79609	NFATC1, NOD2, RELA, IL1A, HLA-DMA, IL6, HLA-DMB, IL1B, TBX21, STAT4, HLA-DRA, IL12A, HLA-DOA, IL12RB1, HLA-DOB, IL18R1, HLA-DQA1, HLA-DRB1, HLA-DQB1, TLR2
KEGG_PATHWAY	hsa05140:Leishmaniasis	21	1.83566	2.25342e-07	587	79	8534	3.86462	7.39096e-05	7.50493e-06	6.04055e-06	5.21892	MARCKSL1, NOS2, NCF2, PTGS2, RELA, NFKBIA, IL1A, HLA-DMA, HLA-DMB, CR1L, IL1B, HLA-DRA, IL12A, JAK2, HLA-DOA, HLA-DOB, MYD88, HLA-DQA1, HLA-DRB1, HLA-DQB1, TLR2
KEGG_PATHWAY	hsa04933:AGE-RAGE signaling pathway in diabetic complications	24	2.0979	2.28809e-07	587	101	8534	3.45465	7.50465e-05	7.50493e-06	6.04055e-06	5.21892	STAT5A, EDN1, CXCL8, SERPINE1, VEGFC, PIK3CD, NFATC1, FOXO1, TGFBR1, RELA, ICAM1, VEGFA, COL1A1, IL1A, IL6, PLCB4, COL4A2, CCND1, COL4A1, IL1B, PIM1, CCL2, NOX4, JAK2
KEGG_PATHWAY	hsa04630:JAK-STAT signaling pathway	32	2.7972	3.19273e-07	587	168	8534	2.76921	0.000104716	9.52013e-06	7.66254e-06	5.11563	CSF3, CSF2, PDGFB, PDGFA, PIK3CD, SOCS3, SOCS1, CCND1, PIM1, STAT4, IL12A, JAK2, IL12RB1, SOCS6, JAK3, MCL1, STAT5A, IFNAR2, IL11, IL15RA, IL15, IL10RA, STAT2, IL31RA, PRLR, IL22RA1, IL6, IL7, IFNE, IL3RA, IL7R, PTPN2
KEGG_PATHWAY	hsa04658:Th1 and Th2 cell differentiation	22	1.92308	8.91287e-07	587	93	8534	3.43917	0.000292299	2.43165e-05	1.95718e-05	4.70837	STAT5A, NOTCH1, NFATC1, RUNX3, RELA, NFKBIA, HLA-DMA, HLA-DMB, PPP3CC, TBX21, STAT4, HLA-DRA, IL12A, JAK2, HLA-DOA, IL12RB1, NFKBIE, JAK3, HLA-DOB, HLA-DQA1, HLA-DRB1, HLA-DQB1
KEGG_PATHWAY	hsa04659:Th17 cell differentiation	24	2.0979	9.71741e-07	587	109	8534	3.2011	0.00031868	2.43165e-05	1.95718e-05	4.70837	STAT5A, EBI3, NFATC1, HIF1A, TGFBR1, RELA, RUNX1, NFKBIA, HLA-DMA, IL6, HLA-DMB, PPP3CC, IL1B, TBX21, HLA-DRA, JAK2, HLA-DOA, IL12RB1, NFKBIE, JAK3, HLA-DOB, HLA-DQA1, HLA-DRB1, HLA-DQB1
KEGG_PATHWAY	hsa05169:Epstein-Barr virus infection	35	3.05944	1.0379e-06	587	204	8534	2.49432	0.000340374	2.43165e-05	1.95718e-05	4.70837	CD40, TNFAIP3, PIK3CD, RELA, ICAM1, HLA-DMA, HLA-DMB, CCND1, BAK1, HLA-DOA, JAK3, HLA-DOB, HLA-DQA1, IFNAR2, GADD45B, STAT2, TAP2, TAP1, ISG15, RUNX3, GADD45G, NFKB2, NFKBIA, CXCL10, IL6, CDK6, OAS2, OAS3, FAS, HLA-DRA, NFKBIE, MYD88, HLA-DRB1, HLA-DQB1, TLR2
KEGG_PATHWAY	hsa04621:NOD-like receptor signaling pathway	33	2.88462	1.51821e-06	587	189	8534	2.53844	0.00049785	3.31983e-05	2.67205e-05	4.57315	CXCL8, TNFAIP3, NOD2, CXCL3, MEFV, RELA, PANX1, TRPM2, CCL5, CASP1, CCL2, NLRP3, GBP2, GBP1, GBP4, GBP3, GSDMD, IFNAR2, GBP5, GBP7, RIPK2, STAT2, NEK7, NFKBIA, IL6, PLCB4, AIM2, OAS2, OAS3, IL1B, MYD88, BIRC2, BIRC3
KEGG_PATHWAY	hsa05152:Tuberculosis	32	2.7972	1.94218e-06	587	182	8534	2.55619	0.000636834	3.98148e-05	3.2046e-05	4.49423	CIITA, NOD2, RELA, CTSS, CYP27B1, HLA-DMA, PPP3CC, HLA-DMB, CASP10, IL12A, JAK2, HLA-DOA, HLA-DOB, HLA-DQA1, CD74, PLK3, FCER1G, NOS2, VDR, RIPK2, IL10RA, SPHK1, IL1A, IL6, CR1L, IL1B, RFX5, HLA-DRA, MYD88, HLA-DRB1, HLA-DQB1, TLR2
KEGG_PATHWAY	hsa05144:Malaria	15	1.31119	4.12573e-06	587	50	8534	4.3615	0.00135233	7.96023e-05	6.40701e-05	4.19334	CSF3, CD40, CXCL8, GYPC, THBS1, ICAM1, COMP, IL6, CR1L, IL1B, CCL2, SDC1, IL12A, MYD88, TLR2
KEGG_PATHWAY	hsa04612:Antigen processing and presentation	19	1.66084	6.82994e-06	587	81	8534	3.41023	0.00223772	0.000124457	0.000100172	3.99925	CD74, CIITA, TAP2, TAP1, IFI30, CTSS, HLA-DMA, HLA-DMB, RFX5, PSME1, HLA-DRA, PSME2, KLRD1, HLA-DOA, HLA-DOB, HLA-DQA1, HLA-DRB1, LGMN, HLA-DQB1
KEGG_PATHWAY	hsa04061:Viral protein interaction with cytokine and cytokine receptor	21	1.83566	1.16258e-05	587	100	8534	3.05305	0.00380603	0.000200698	0.000161538	3.79173	CSF1R, CXCL9, CXCL8, CSF1, IL10RA, CXCL3, CXCL5, CX3CL1, IL22RA1, CXCL10, CXCL11, IL6, CCL8, CCL7, CCL5, TNFSF10, CCL3, CCL2, ACKR3, CCR7, IL18R1
KEGG_PATHWAY	hsa04210:Apoptosis	25	2.18531	1.52024e-05	587	136	8534	2.67249	0.00497403	0.00024932	0.000200672	3.69751	PIK3CD, RELA, CTSS, ACTB, TUBA1C, CASP7, CTSO, CASP10, TNFSF10, PMAIP1, BAK1, CTSC, MCL1, NTRK1, GADD45B, TRAF1, SEPTIN4, NGF, TUBA4A, GADD45G, NFKBIA, IL3RA, FAS, BIRC2, BIRC3
KEGG_PATHWAY	hsa05133:Pertussis	18	1.57343	1.61297e-05	587	78	8534	3.355	0.00527661	0.00025193	0.000202773	3.69299	CXCL8, NOS2, LOC110384692, C4B_2, CXCL5, RELA, C4B, IL1A, CASP7, IL6, IL1B, IRF1, CASP1, IRF8, SERPING1, NLRP3, IL12A, MYD88
KEGG_PATHWAY	hsa05145:Toxoplasmosis	22	1.92308	2.00137e-05	587	112	8534	2.85574	0.00654305	0.000298386	0.000240164	3.61949	CIITA, CD40, NOS2, IL10RA, RELA, PIK3R5, NFKBIA, HLA-DMA, HLA-DMB, SOCS1, HLA-DRA, IL12A, JAK2, HLA-DOA, HLA-DOB, MYD88, BIRC2, HLA-DQA1, HLA-DRB1, BIRC3, HLA-DQB1, TLR2
KEGG_PATHWAY	hsa04672:Intestinal immune network for IgA production	14	1.22378	2.20082e-05	587	50	8534	4.07073	0.00719276	0.000313855	0.000252615	3.59754	IL15RA, CD40, IL15, TNFSF13B, HLA-DMA, IL6, HLA-DMB, LOC102723996, HLA-DRA, HLA-DOA, HLA-DOB, HLA-DQA1, HLA-DRB1, HLA-DQB1
KEGG_PATHWAY	hsa04064:NF-kappa B signaling pathway	21	1.83566	2.47389e-05	587	105	8534	2.90767	0.00808163	0.000338099	0.000272128	3.56523	CD40, CXCL8, GADD45B, TNFAIP3, TRAF1, CXCL3, PTGS2, RELA, GADD45G, TNFSF13B, NFKB2, ICAM1, NFKBIA, CYLD, PPP1R13L, PLAU, IL1B, CARD14, MYD88, BIRC2, BIRC3
KEGG_PATHWAY	hsa04151:PI3K-Akt signaling pathway	47	4.10839	3.08698e-05	587	362	8534	1.88757	0.0100743	0.000405011	0.000325985	3.4868	CSF1R, CSF3, CSF1, IRS1, PDGFB, TNC, PDGFA, PIK3CD, TGFA, FGF1, FGF2, THBS1, RELA, PIK3R5, COMP, CCND1, PDGFC, MYB, ITGB8, ITGB6, JAK2, JAK3, MCL1, PCK2, NTRK1, IFNAR2, NGFR, ITGA2, ITGA1, IGF2, VEGFC, NGF, PRLR, VEGFA, COL1A1, IL6, CDK6, COL4A2, GDNF, COL4A1, IL7, IL3RA, GNB4, PIK3AP1, IL7R, ITGA9, TLR2
KEGG_PATHWAY	hsa05332:Graft-versus-host disease	13	1.13636	3.45795e-05	587	45	8534	4.19996	0.0112782	0.000436233	0.000351115	3.45455	IL1A, HLA-DMA, IL6, HLA-DMB, IL1B, FAS, HLA-DRA, KLRD1, HLA-DOA, HLA-DOB, HLA-DQA1, HLA-DRB1, HLA-DQB1
KEGG_PATHWAY	hsa04820:Cytoskeleton in muscle cells	33	2.88462	0.000110273	587	232	8534	2.06795	0.0355251	0.00133961	0.00107822	2.96729	SDC4, SYNPO2, COL11A1, THBS1, ACTB, SYNE1, MYOM3, COMP, CSRP1, XIRP1, ANKRD1, ITGB8, MYH11, ITGB6, PDLIM7, COL27A1, ACTN2, NEBL, ITGA2, TPM1, ITGA1, BGN, FMNL3, COL1A1, FMNL2, COL4A2, COL4A1, COL5A2, SSPN, MYH9, SDC1, DSC2, ITGA9
KEGG_PATHWAY	hsa04623:Cytosolic DNA-sensing pathway	17	1.48601	0.000136661	587	83	8534	2.97773	0.0438381	0.00156809	0.00126212	2.8989	GSDMD, IL33, MLKL, CGAS, MEFV, SAMHD1, RELA, NFKBIA, CXCL10, CASP7, IL6, AIM2, IL1B, CCL5, POLR3D, CASP1, NLRP3
KEGG_PATHWAY	hsa04940:Type I diabetes mellitus	12	1.04895	0.000138642	587	44	8534	3.965	0.0444591	0.00156809	0.00126212	2.8989	IL1A, HLA-DMA, HLA-DMB, IL1B, HLA-DRA, FAS, IL12A, HLA-DOA, HLA-DOB, HLA-DRB1, HLA-DQA1, HLA-DQB1
KEGG_PATHWAY	hsa05167:Kaposi sarcoma-associated herpesvirus infection	29	2.53497	0.000160896	587	196	8534	2.15108	0.0514096	0.00175913	0.00141589	2.84897	CSF2, CXCL8, LEF1, PDGFB, PIK3CD, CXCL3, PTGS2, FGF2, HIF1A, RELA, PIK3R5, ICAM1, PPP3CC, CCND1, BAK1, JAK2, MICB, IFNAR2, STAT2, NFATC1, VEGFA, NFKBIA, RCAN1, HCK, IL6, CDK6, GNB4, FAS, TLR3
KEGG_PATHWAY	hsa05310:Asthma	10	0.874126	0.000213855	587	32	8534	4.54323	0.0677477	0.00226272	0.00182121	2.73964	HLA-DMA, CD40, HLA-DMB, FCER1G, HLA-DRA, HLA-DOA, HLA-DOB, HLA-DRB1, HLA-DQA1, HLA-DQB1
KEGG_PATHWAY	hsa05330:Allograft rejection	11	0.961538	0.000222156	587	39	8534	4.10055	0.0702831	0.0022771	0.00183278	2.73689	HLA-DMA, CD40, HLA-DMB, HLA-DRA, FAS, IL12A, HLA-DOA, HLA-DOB, HLA-DRB1, HLA-DQA1, HLA-DQB1
KEGG_PATHWAY	hsa05134:Legionellosis	13	1.13636	0.000334673	587	56	8534	3.37497	0.103979	0.00332645	0.00267738	2.57229	CXCL8, CXCL3, RELA, NFKB2, NFKBIA, CASP7, IL6, CR1L, IL1B, CASP1, IL12A, MYD88, TLR2
KEGG_PATHWAY	hsa04620:Toll-like receptor signaling pathway	19	1.66084	0.000409052	587	109	8534	2.5342	0.125582	0.00394615	0.00317617	2.4981	IFNAR2, CXCL9, CD40, CXCL8, STAT2, PIK3CD, RELA, NFKBIA, CXCL10, CXCL11, IL6, IL1B, CCL5, CCL3, IL12A, IRF5, MYD88, TLR3, TLR2
KEGG_PATHWAY	hsa04514:Cell adhesion molecules	24	2.0979	0.000462612	587	158	8534	2.20835	0.140816	0.00433533	0.00348941	2.45725	CD274, CD40, SDC4, PDCD1LG2, CLDN1, PVR, ICAM1, IGSF11, HLA-DMA, CLDN4, HLA-DMB, LOC102723996, CDH2, CLDN14, CLDN7, SDC1, ITGB8, HLA-DRA, HLA-DOA, HLA-DOB, HLA-DQA1, HLA-DRB1, ITGA9, HLA-DQB1
KEGG_PATHWAY	hsa05222:Small cell lung cancer	17	1.48601	0.000530173	587	93	8534	2.65754	0.159655	0.00483046	0.00388793	2.41028	GADD45B, NOS2, ITGA2, PIK3CD, TRAF1, PTGS2, RELA, GADD45G, NFKBIA, CDK6, COL4A2, CCND1, COL4A1, CKS2, BAK1, BIRC2, BIRC3
KEGG_PATHWAY	hsa04657:IL-17 signaling pathway	17	1.48601	0.000676037	587	95	8534	2.6016	0.198937	0.00599298	0.00482362	2.31663	CSF3, CXCL8, CSF2, MMP3, TNFAIP3, CXCL3, PTGS2, CXCL5, RELA, NFKBIA, CXCL10, IL6, MMP13, CCL7, IL1B, CCL2, FOSB
KEGG_PATHWAY	hsa04625:C-type lectin receptor signaling pathway	18	1.57343	0.000741605	587	105	8534	2.49229	0.215993	0.00640122	0.0051522	2.28801	PLK3, EGR2, FCER1G, STAT2, PIK3CD, NFATC1, PTGS2, RELA, NFKB2, NFKBIA, CYLD, IL6, PPP3CC, IL1B, IRF1, CASP1, NLRP3, IL12A
KEGG_PATHWAY	hsa05171:Coronavirus disease - COVID-19	31	2.70979	0.000848849	587	238	8534	1.89365	0.243113	0.00710867	0.00572161	2.24248	CSF3, CSF2, CXCL8, PIK3CD, CGAS, C8B, C4B_2, RELA, IFIH1, C4B, CASP1, C3AR1, CCL2, NLRP3, IL12A, IFNAR2, STAT2, MMP3, ISG15, LOC110384692, NFKBIA, CXCL10, IL6, OAS2, OAS3, IL1B, MYD88, CFB, TLR3, HBEGF, TLR2
KEGG_PATHWAY	hsa04610:Complement and coagulation cascades	16	1.3986	0.000866911	587	88	8534	2.64333	0.247587	0.00710867	0.00572161	2.24248	SERPINA1, SERPINB2, CFH, SERPINE1, PLAUR, LOC110384692, C4B_2, C8B, CLU, C4B, PROCR, CR1L, PLAU, C3AR1, SERPING1, CFB
KEGG_PATHWAY	hsa05202:Transcriptional misregulation in cancer	27	2.36014	0.00101192	587	198	8534	1.9825	0.28257	0.00809539	0.0065158	2.18603	CSF1R, CD40, CSF2, CXCL8, PDGFA, JMJD1C, MLLT3, FOXO1, RELA, PLAU, NFKBIZ, BAK1, NTRK1, NGFR, GADD45B, MMP3, TRAF1, PAX5, RUNX2, PML, RUNX1, GADD45G, ETV7, IL6, SPINT1, BIRC2, BIRC3
KEGG_PATHWAY	hsa04217:Necroptosis	23	2.01049	0.0012184	587	159	8534	2.10303	0.3296	0.0091903	0.00739707	2.13094	STAT5A, IFNAR2, IL33, MLKL, STAT2, TNFAIP3, PYGM, MACROH2A2, H2AC18, IL1A, CYLD, IL1B, CASP1, TNFSF10, STAT4, FAS, NLRP3, JAK2, GLUL, JAK3, BIRC2, TLR3, BIRC3
KEGG_PATHWAY	hsa04145:Phagosome	23	2.01049	0.0012184	587	159	8534	2.10303	0.3296	0.0091903	0.00739707	2.13094	STX12, NCF2, ITGA2, TUBB, TAP2, TAP1, THBS1, TUBA4A, CTSS, ACTB, COMP, TUBA1C, HLA-DMA, TUBB6, HLA-DMB, OLR1, HLA-DRA, HLA-DOA, HLA-DOB, HLA-DQA1, HLA-DRB1, HLA-DQB1, TLR2
KEGG_PATHWAY	hsa05162:Measles	21	1.83566	0.00123284	587	139	8534	2.19644	0.332771	0.0091903	0.00739707	2.13094	STAT5A, IFNAR2, STAT2, PIK3CD, TNFAIP3, RELA, IFIH1, NFKBIA, IL1A, IL6, CDK6, CCND1, OAS2, IL1B, OAS3, FAS, IL12A, BAK1, JAK3, MYD88, TLR2
KEGG_PATHWAY	hsa05130:Pathogenic Escherichia coli infection	27	2.36014	0.00146168	587	203	8534	1.93367	0.381082	0.010654	0.00857519	2.06676	CXCL8, CLDN1, RELA, ACTB, TUBA1C, TUBB6, CASP7, CASP1, TNFSF10, NLRP3, MYH11, BAK1, MYO10, TUBB, TUBA4A, TJP1, NFKBIA, MYO1B, CLDN4, IL6, CLDN14, IL1B, CLDN7, MYH9, FAS, MYD88, MYO1G
KEGG_PATHWAY	hsa05146:Amoebiasis	17	1.48601	0.00165013	587	103	8534	2.39953	0.418236	0.0115158	0.00926881	2.03298	SERPINB4, CXCL8, CSF2, NOS2, ACTN1, PIK3CD, CXCL3, C8B, RELA, COL1A1, IL6, PLCB4, COL4A2, COL4A1, IL1B, IL12A, TLR2
KEGG_PATHWAY	hsa05142:Chagas disease	17	1.48601	0.00165013	587	103	8534	2.39953	0.418236	0.0115158	0.00926881	2.03298	CXCL8, NOS2, SERPINE1, PIK3CD, TGFBR1, RELA, NFKBIA, IL6, PLCB4, IL1B, CCL5, CCL3, FAS, CCL2, IL12A, MYD88, TLR2
KEGG_PATHWAY	hsa05417:Lipid and atherosclerosis	28	2.44755	0.00171658	587	216	8534	1.8846	0.4308	0.01173	0.0094412	2.02497	CD40, CXCL8, NCF2, PIK3CD, CXCL3, RELA, ICAM1, CASP7, PPP3CC, CCL5, CASP1, CCL3, TNFSF10, CCL2, OLR1, NLRP3, IL12A, JAK2, MMP3, NFATC1, POU2F2, NFKBIA, IL6, PLCB4, IL1B, FAS, MYD88, TLR2
KEGG_PATHWAY	hsa05416:Viral myocarditis	13	1.13636	0.00264352	587	70	8534	2.69998	0.580304	0.0176954	0.0142427	1.84641	CD40, ACTB, ICAM1, HLA-DMA, HLA-DMB, CCND1, SSPN, HLA-DRA, HLA-DOA, HLA-DOB, HLA-DQA1, HLA-DRB1, HLA-DQB1
KEGG_PATHWAY	hsa05166:Human T-cell leukemia virus 1 infection	28	2.44755	0.00290298	587	224	8534	1.81729	0.614635	0.0190436	0.0153278	1.81452	CD40, CSF2, SLC2A1, PIK3CD, ETS1, RELA, ICAM1, HLA-DMA, PPP3CC, HLA-DMB, CCND1, HLA-DOA, JAK3, HLA-DOB, HLA-DQA1, STAT5A, IL15RA, EGR2, MSX2, IL15, NFATC1, TGFBR1, NFKB2, NFKBIA, IL6, HLA-DRA, HLA-DRB1, HLA-DQB1
KEGG_PATHWAY	hsa05143:African trypanosomiasis	9	0.786713	0.00307084	587	37	8534	3.53635	0.635339	0.0196169	0.0157892	1.80164	IL6, PLCB4, IL1B, FAS, IL12A, APOL1, MYD88, IDO1, ICAM1
KEGG_PATHWAY	hsa05235:PD-L1 expression and PD-1 checkpoint pathway in cancer	15	1.31119	0.00310999	587	90	8534	2.42306	0.640005	0.0196169	0.0157892	1.80164	ALK, CD274, BATF2, BATF3, PIK3CD, NFATC1, RASGRP1, HIF1A, RELA, NFKBIA, PPP3CC, JAK2, NFKBIE, MYD88, TLR2
KEGG_PATHWAY	hsa05223:Non-small cell lung cancer	13	1.13636	0.00378624	587	73	8534	2.58902	0.711841	0.0233473	0.0187917	1.72603	ALK, STAT5A, GADD45B, PIK3CD, TGFA, GADD45G, CDK6, CCND1, KIF5C, RASSF5, KIF5A, BAK1, JAK3
KEGG_PATHWAY	hsa05132:Salmonella infection	30	2.62238	0.0038667	587	251	8534	1.73765	0.719375	0.0233473	0.0187917	1.72603	RALA, CXCL8, LEF1, PIK3CD, MYL12A, RELA, ACTB, TUBA1C, TUBB6, CASP7, KIF5C, KIF5A, CASP1, TNFSF10, NLRP3, BAK1, GSDMD, MLKL, DYNLT1, RIPK2, TUBB, TUBA4A, NFKBIA, IL6, IL1B, ELMO2, MYD88, BIRC2, BIRC3, TLR2
KEGG_PATHWAY	hsa05150:Staphylococcus aureus infection	16	1.3986	0.00391494	587	102	8534	2.28052	0.723797	0.0233473	0.0187917	1.72603	CFH, LOC110384692, C4B_2, ICAM1, C4B, HLA-DMA, HLA-DMB, KRT17, C3AR1, HLA-DRA, HLA-DOA, HLA-DOB, HLA-DQA1, HLA-DRB1, CFB, HLA-DQB1
KEGG_PATHWAY	hsa04380:Osteoclast differentiation	20	1.74825	0.00405865	587	143	8534	2.03333	0.736564	0.0237721	0.0191336	1.7182	IFNAR2, CSF1R, CSF1, NCF2, STAT2, PIK3CD, NFATC1, TGFBR1, RELA, NFKB2, NFKBIA, IL1A, CYLD, SOCS3, SOCS1, PPP3CC, IL1B, FOSB, LCP2, JUNB
KEGG_PATHWAY	hsa04215:Apoptosis - multiple species	8	0.699301	0.00516267	587	32	8534	3.63458	0.816904	0.029708	0.0239113	1.6214	NGFR, CASP7, PMAIP1, BAK1, SEPTIN4, BIRC2, BIRC3, BOK
KEGG_PATHWAY	hsa04510:Focal adhesion	25	2.18531	0.00616924	587	203	8534	1.79043	0.868635	0.0348881	0.0280807	1.55159	PDGFB, TNC, PDGFA, PIK3CD, THBS1, MYL12A, ACTB, COMP, CCND1, PDGFC, ITGB8, ITGB6, PPP1R12A, CAV2, ACTN1, ITGA2, ITGA1, VEGFC, VEGFA, COL1A1, COL4A2, COL4A1, BIRC2, BIRC3, ITGA9
KEGG_PATHWAY	hsa04062:Chemokine signaling pathway	24	2.0979	0.00659382	587	193	8534	1.80788	0.885815	0.0366571	0.0295045	1.53011	ITK, CXCL9, CXCL8, STAT2, PIK3CD, CXCL3, CXCL5, CX3CL1, RELA, PIK3R5, NFKBIA, CXCL10, HCK, CXCL11, CCL8, PLCB4, CCL7, CCL5, CCL3, GNB4, CCL2, CCR7, JAK2, JAK3
KEGG_PATHWAY	hsa04512:ECM-receptor interaction	14	1.22378	0.00740223	587	89	8534	2.28693	0.912574	0.0404655	0.0325698	1.48718	SDC4, ITGA2, ITGA1, TNC, GP1BA, THBS1, COL1A1, COMP, COL4A2, COL4A1, SDC1, ITGB8, ITGB6, ITGA9
KEGG_PATHWAY	hsa04622:RIG-I-like receptor signaling pathway	12	1.04895	0.00952172	587	72	8534	2.42306	0.956634	0.0504135	0.0405767	1.39172	IFIH1, NFKBIA, CYLD, CXCL10, ZNFX1, CXCL8, CASP10, IFNE, DHX58, ISG15, IL12A, RELA
KEGG_PATHWAY	hsa04936:Alcoholic liver disease	19	1.66084	0.00952937	587	144	8534	1.91825	0.956744	0.0504135	0.0405767	1.39172	CXCL8, LEF1, LOC110384692, C4B_2, CXCL3, FOXO1, RELA, C4B, NFKBIA, IL6, CCND1, ALDH1B1, ACOX1, IL1B, C3AR1, FAS, NOX4, IL12A, MYD88
KEGG_PATHWAY	hsa05320:Autoimmune thyroid disease	10	0.874126	0.0105072	587	54	8534	2.69228	0.968715	0.0547043	0.0440303	1.35625	HLA-DMA, CD40, HLA-DMB, HLA-DRA, FAS, HLA-DOA, HLA-DOB, HLA-DRB1, HLA-DQA1, HLA-DQB1
KEGG_PATHWAY	hsa04390:Hippo signaling pathway	20	1.74825	0.0109887	587	157	8534	1.85202	0.97333	0.0563169	0.0453283	1.34363	TEAD4, BMPR2, WWC1, LEF1, WNT5A, SERPINE1, WNT9A, FGF1, TGFBR1, ACTB, NKD1, SMAD7, BMP2, FRMD6, CCND1, TP53BP2, CCN2, WNT2, BIRC2, BIRC3
KEGG_PATHWAY	hsa04974:Protein digestion and absorption	15	1.31119	0.0122788	587	105	8534	2.0769	0.982619	0.0619605	0.0498707	1.30215	COL27A1, COL11A1, COL22A1, SLC8A1, SLC8A2, COL1A1, SLC7A7, CTRL, COL4A2, COL4A1, COL7A1, COL5A2, COL8A2, COL10A1, KCNN4
KEGG_PATHWAY	hsa05340:Primary immunodeficiency	8	0.699301	0.0135536	587	38	8534	3.0607	0.988621	0.0673572	0.0542143	1.26589	CIITA, CD40, RFX5, TAP2, TAP1, IL7R, JAK3, ADA
KEGG_PATHWAY	hsa05412:Arrhythmogenic right ventricular cardiomyopathy	13	1.13636	0.0140119	587	86	8534	2.19765	0.99023	0.0685957	0.0552112	1.25797	ACTN2, ITGA2, LEF1, ITGA1, SLC8A1, ACTB, SLC8A2, CDH2, SSPN, ITGB8, ITGB6, DSC2, ITGA9
KEGG_PATHWAY	hsa05215:Prostate cancer	14	1.22378	0.0161265	587	98	8534	2.0769	0.995169	0.0768579	0.0618613	1.20858	LEF1, MMP3, PDGFB, PDGFA, PIK3CD, TGFA, FOXO1, RELA, NFKBIA, SPINT1, CCND1, PLAU, PDGFC, NKX3-1
KEGG_PATHWAY	hsa05322:Systemic lupus erythematosus	18	1.57343	0.0161683	587	141	8534	1.85596	0.995235	0.0768579	0.0618613	1.20858	CD40, ACTN1, LOC110384692, C4B_2, MACROH2A2, C8B, H2BC18, H2AC18, C4B, HLA-DMA, HLA-DMB, HLA-DRA, HLA-DOA, HLA-DOB, TRIM21, HLA-DQA1, HLA-DRB1, HLA-DQB1
KEGG_PATHWAY	hsa05221:Acute myeloid leukemia	11	0.961538	0.0169327	587	68	8534	2.35179	0.996308	0.0793416	0.0638603	1.19477	STAT5A, CSF1R, CSF2, CCND1, LEF1, PIM1, PIK3CD, PIM2, RELA, PML, RUNX1
KEGG_PATHWAY	hsa04978:Mineral absorption	10	0.874126	0.0224247	587	61	8534	2.38333	0.999412	0.103596	0.083382	1.07893	MT2A, MT1A, VDR, MT1M, MT1F, MT1G, MT1X, SLC8A1, MT1E, SLC8A2
KEGG_PATHWAY	hsa05160:Hepatitis C	19	1.66084	0.0244023	587	159	8534	1.73728	0.999697	0.111166	0.0894749	1.0483	IFNAR2, RSAD2, STAT2, PIK3CD, CLDN1, RELA, NFKBIA, CXCL10, SOCS3, CLDN4, CDK6, CCND1, CLDN14, OAS2, OAS3, CLDN7, FAS, BAK1, TLR3
KEGG_PATHWAY	hsa05218:Melanoma	11	0.961538	0.0266824	587	73	8534	2.19071	0.99986	0.119888	0.0964954	1.01549	CDK6, CCND1, GADD45B, PDGFC, PDGFB, PDGFA, PIK3CD, BAK1, FGF1, FGF2, GADD45G
KEGG_PATHWAY	hsa05161:Hepatitis B	19	1.66084	0.0304026	587	163	8534	1.69465	0.99996	0.134758	0.108463	0.964717	STAT5A, EGR2, CXCL8, STAT2, PIK3CD, NFATC1, TGFBR1, RELA, IFIH1, NFKBIA, IL6, CASP10, STAT4, FAS, JAK2, JAK3, MYD88, TLR3, TLR2
KEGG_PATHWAY	hsa03050:Proteasome	8	0.699301	0.035905	587	46	8534	2.52841	0.999994	0.155421	0.125095	0.902761	PSMA4, PSMA2, POMP, PSME1, PSME2, PSMB8, PSMB10, PSMB9
KEGG_PATHWAY	hsa05163:Human cytomegalovirus infection	24	2.0979	0.0368382	587	226	8534	1.54389	0.999995	0.155421	0.125095	0.902761	CXCL8, IL10RA, TAP2, TAP1, PIK3CD, CGAS, NFATC1, PTGS2, CX3CL1, RELA, VEGFA, NFKBIA, IL6, PLCB4, CDK6, PPP3CC, CCND1, IL1B, CCL5, CCL3, GNB4, FAS, CCL2, BAK1
KEGG_PATHWAY	hsa05220:Chronic myeloid leukemia	11	0.961538	0.0369598	587	77	8534	2.0769	0.999996	0.155421	0.125095	0.902761	STAT5A, NFKBIA, CDK6, CCND1, GADD45B, PIK3CD, BAK1, RELA, TGFBR1, GADD45G, RUNX1
KEGG_PATHWAY	hsa05212:Pancreatic cancer	11	0.961538	0.0369598	587	77	8534	2.0769	0.999996	0.155421	0.125095	0.902761	RALA, CDK6, CCND1, GADD45B, PIK3CD, TGFA, BAK1, RELA, TGFBR1, GADD45G, VEGFA
KEGG_PATHWAY	hsa04010:MAPK signaling pathway	30	2.62238	0.0381371	587	300	8534	1.45383	0.999997	0.158342	0.127446	0.894675	CSF1R, CSF1, PDGFB, PDGFA, TGFA, FGF1, FGF2, RASGRP1, RELA, CACNA1I, PPP3CC, RPS6KA5, PDGFC, NTRK1, NGFR, DUSP5, GADD45B, IGF2, VEGFC, NFATC1, NGF, TGFBR1, GADD45G, NFKB2, VEGFA, IL1A, GDNF, IL1B, FAS, MYD88
KEGG_PATHWAY	hsa05205:Proteoglycans in cancer	22	1.92308	0.0402332	587	204	8534	1.56786	0.999999	0.164956	0.132769	0.876902	PPP1R12A, SDC4, CAV2, ITGA2, WNT5A, PLAUR, IGF2, PIK3CD, WNT9A, FGF2, THBS1, HIF1A, ACTB, VEGFA, COL1A1, CCND1, PLAU, FAS, SDC1, WNT2, HBEGF, TLR2
KEGG_PATHWAY	hsa04218:Cellular senescence	18	1.57343	0.0407723	587	157	8534	1.66681	0.999999	0.165103	0.132888	0.876515	CXCL8, GADD45B, SERPINE1, PIK3CD, NFATC1, ETS1, CDC25A, FOXO1, TGFBR1, RELA, GADD45G, IL1A, IL6, CDK6, PPP3CC, CCND1, RASSF5, NBN
KEGG_PATHWAY	hsa04920:Adipocytokine signaling pathway	10	0.874126	0.048988	587	70	8534	2.0769	1	0.195952	0.157717	0.80212	NFKBIA, SOCS3, IRS1, ACSL1, SLC2A1, ACSL5, JAK2, NFKBIE, RELA, PCK2
KEGG_PATHWAY	hsa04917:Prolactin signaling pathway	10	0.874126	0.0528483	587	71	8534	2.04765	1	0.207055	0.166654	0.778185	STAT5A, SOCS3, SOCS1, CCND1, IRF1, PIK3CD, JAK2, SOCS6, PRLR, RELA
KEGG_PATHWAY	hsa04520:Adherens junction	12	1.04895	0.0530262	587	93	8534	1.87591	1	0.207055	0.166654	0.778185	TJP1, SMURF2, SMURF1, ACTN1, LEF1, SNAI1, PTPRJ, LMO7, NECTIN4, MYL12A, TGFBR1, ACTB
KEGG_PATHWAY	hsa05219:Bladder cancer	7	0.611888	0.059139	587	41	8534	2.48215	1	0.226756	0.182511	0.738712	RPS6KA5, CXCL8, CCND1, THBS1, TYMP, VEGFA, HBEGF
KEGG_PATHWAY	hsa05418:Fluid shear stress and atherosclerosis	16	1.3986	0.0594542	587	141	8534	1.64974	1	0.226756	0.182511	0.738712	EDN1, BMPR2, SDC4, NCF2, CAV2, PDGFB, PDGFA, PIK3CD, RELA, ACTB, ICAM1, VEGFA, IL1A, IL1B, CCL2, SDC1
KEGG_PATHWAY	hsa00533:Glycosaminoglycan biosynthesis - keratan sulfate	4	0.34965	0.0664668	587	14	8534	4.15381	1	0.250587	0.201692	0.695311	CHST6, B4GALT1, B3GNT2, ST3GAL1
KEGG_PATHWAY	hsa04115:p53 signaling pathway	10	0.874126	0.0702452	587	75	8534	1.93844	1	0.261823	0.210736	0.676262	CDK6, CCND1, CD82, GADD45B, PPP1R13L, SERPINE1, FAS, PMAIP1, THBS1, GADD45G
KEGG_PATHWAY	hsa05165:Human papillomavirus infection	31	2.70979	0.0757786	587	333	8534	1.35342	1	0.277866	0.223648	0.650435	NOTCH1, TNC, PIK3CD, PTGS2, THBS1, FOXO1, RELA, OASL, COMP, LFNG, CCND1, ITGB8, BAK1, ITGB6, WNT2, IFNAR2, ITGA2, STAT2, ITGA1, WNT5A, ISG15, WNT9A, VEGFA, COL1A1, CDK6, COL4A2, COL4A1, IRF1, FAS, TLR3, ITGA9
KEGG_PATHWAY	hsa05410:Hypertrophic cardiomyopathy	12	1.04895	0.0762437	587	99	8534	1.76222	1	0.277866	0.223648	0.650435	IL6, EDN1, ITGA2, TPM1, ITGA1, SSPN, ITGB8, ITGB6, SLC8A1, ACTB, ITGA9, SLC8A2
KEGG_PATHWAY	hsa05135:Yersinia infection	15	1.31119	0.0909757	587	138	8534	1.58025	1	0.327913	0.26393	0.578512	CXCL8, PIK3CD, NFATC1, MEFV, RELA, ACTB, NFKBIA, IL6, IL1B, CASP1, CCL2, ELMO2, NLRP3, LCP2, MYD88
KEGG_PATHWAY	hsa04014:Ras signaling pathway	23	2.01049	0.0937302	587	238	8534	1.40496	1	0.334168	0.268965	0.570305	NTRK1, NGFR, CSF1R, RALA, CSF1, PDGFB, IGF2, VEGFC, PDGFA, PIK3CD, TGFA, RASAL2, NGF, FGF1, ETS1, FGF2, RASGRP1, RELA, VEGFA, RASSF5, PDGFC, GNB4, PLA1A
KEGG_PATHWAY	hsa01521:EGFR tyrosine kinase inhibitor resistance	10	0.874126	0.0964831	587	80	8534	1.81729	1	0.340284	0.273887	0.562428	IL6, PDGFC, PDGFB, PDGFA, PIK3CD, TGFA, NRG1, JAK2, FGF2, VEGFA
KEGG_PATHWAY	hsa04540:Gap junction	11	0.961538	0.0986856	587	92	8534	1.73828	1	0.34435	0.27716	0.55727	TJP1, TUBA1C, GUCY1A1, TUBB6, PLCB4, TUBB, PDGFC, PDGFB, PDGFA, ADRB1, TUBA4A

## Sheet: KEGG DOWN
Category	Term	Count	%	PValue	List Total	Pop Hits	Pop Total	Fold Enrichment	Bonferroni	Benjamini	FDR	-log10 (q-value)	Genes
KEGG_PATHWAY	hsa01100:Metabolic pathways	164	14.386	1.87532e-11	550	1570	8534	1.62082	6.16981e-09	6.1698e-09	5.73847e-09	8.2412	DMGDH, GALNT11, DGKD, GALNT13, GALNT15, GALNT17, SAT2, PLB1, TM7SF2, FADS2, LIPC, ENPP2, ENPP1, ENPP6, GYG2, HADH, FADS1, GAMT, GUCY1A2, G6PD, ATP6V1G2, DGAT2, PCYT2, ENTPD6, HSD11B1L, CMBL, ACYP1, HOGA1, PGD, CYP27A1, ALDH3A2, ALDH3A1, DPM3, PLPP2, HPD, ALDH7A1, PFKFB2, ISYNA1, MAOA, PDE1A, SHMT1, AK1, MGST1, GSTT2, MGST2, AK5, PLA2G6, ACACB, ADH4, INPP5A, CYP11A1, AMDHD2, ALDH3B1, DSEL, LDHD, N…
KEGG_PATHWAY	hsa00980:Metabolism of xenobiotics by cytochrome P450	18	1.57895	8.17618e-06	550	79	8534	3.53537	0.00268636	0.00134498	0.00125096	2.90276	GSTM4, GSTM3, GSTM2, ADH1C, ADH1B, AKR1C1, EPHX1, MGST1, MGST2, GSTT2, HSD11B1L, ALDH3A1, ADH4, GSTA4, ALDH3B1, CYP1A1, CYP1B1, GSTM5
KEGG_PATHWAY	hsa00982:Drug metabolism - cytochrome P450	16	1.40351	4.92748e-05	550	73	8534	3.40085	0.0160811	0.00540381	0.00502603	2.29877	GSTM4, GSTM3, GSTM2, ADH1C, MAOA, ADH1B, MGST1, MGST2, GSTT2, FMO4, ALDH3A1, ADH4, GSTA4, ALDH3B1, AOX1, GSTM5
KEGG_PATHWAY	hsa00480:Glutathione metabolism	14	1.22807	7.29461e-05	550	59	8534	3.68185	0.0237144	0.00599981	0.00558037	2.25334	GSTM4, GSTM3, GSTM2, G6PD, GPX4, GPX3, IDH1, MGST1, MGST2, GSTT2, PGD, OPLAH, GSTA4, GSTM5
KEGG_PATHWAY	hsa05200:Pathways in cancer	55	4.82456	0.000498788	550	533	8534	1.60113	0.151379	0.028894	0.026874	1.57067	FRAT1, FGF7, EDNRB, CCND2, BDKRB2, IL6R, PRKCB, DAPK1, MITF, FOS, AXIN2, KIF7, PGF, TGFBR2, BCR, AR, SMO, KIT, COL4A5, PPARG, PTGER4, CEBPA, NOTCH3, LAMA2, EPAS1, LAMA4, TCF7, LAMA3, MGST1, LRP5, GSTT2, MGST2, WNT11, GNG7, JAG2, GSTM4, GSTM3, ARNT2, NQO1, GSTM2, TCF7L1, SMAD3, FZD4, TGFB3, GADD45A, TXNRD1, FZD7, PTCH1, BMP4, MAPK10, KITLG, CXCL12, GSTA4, GSTM5, FGF10
KEGG_PATHWAY	hsa05225:Hepatocellular carcinoma	24	2.10526	0.00053253	550	170	8534	2.19055	0.160752	0.028894	0.026874	1.57067	GSTM4, NQO1, GSTM3, GSTM2, TCF7L1, SMARCD3, SMAD3, FZD4, TGFB3, PRKCB, GADD45A, TXNRD1, FZD7, TCF7, MGST1, LRP5, MGST2, GSTT2, AXIN2, TGFBR2, FRAT1, WNT11, GSTA4, GSTM5
KEGG_PATHWAY	hsa00620:Pyruvate metabolism	11	0.964912	0.000663169	550	47	8534	3.63149	0.196079	0.028894	0.026874	1.57067	ALDH3A2, ADH4, PC, ADH1C, ADH1B, LDHD, ME1, ACYP1, PCK1, ACACB, ALDH7A1
KEGG_PATHWAY	hsa04146:Peroxisome	15	1.31579	0.000752598	550	83	8534	2.80416	0.219404	0.028894	0.026874	1.57067	PECR, MVK, EPHX2, IDH1, ECH1, MPV17L, PEX5L, NUDT7, ACOX2, PXMP2, CAT, PMVK, PXMP4, MPV17, DECR2
KEGG_PATHWAY	hsa00280:Valine, leucine and isoleucine degradation	11	0.964912	0.000790413	550	48	8534	3.55583	0.229063	0.028894	0.026874	1.57067	ALDH3A2, MCEE, ALDH6A1, AUH, OXCT1, BCKDHB, AOX1, HADH, ACADSB, ALDH7A1, BCAT2
KEGG_PATHWAY	hsa00350:Tyrosine metabolism	9	0.789474	0.00169205	550	36	8534	3.87909	0.427164	0.0491533	0.0457171	1.33992	ALDH3A1, ADH4, ADH1C, MAOA, ADH1B, ALDH3B1, AOX1, FAH, HPD
KEGG_PATHWAY	hsa05204:Chemical carcinogenesis - DNA adducts	13	1.14035	0.00173172	550	71	8534	2.84102	0.434604	0.0491533	0.0457171	1.33992	GSTM4, GSTM3, GSTM2, EPHX1, MGST1, MGST2, GSTT2, AKR1C2, HSD11B1L, GSTA4, CYP1A1, CYP1B1, GSTM5
KEGG_PATHWAY	hsa00604:Glycosphingolipid biosynthesis - ganglio series	6	0.526316	0.0018912	550	15	8534	6.20655	0.463557	0.0491533	0.0457171	1.33992	ST8SIA1, ST8SIA5, ST3GAL5, B4GALNT1, ST6GALNAC4, ST6GALNAC5
KEGG_PATHWAY	hsa02010:ABC transporters	10	0.877193	0.00194223	550	45	8534	3.44808	0.472504	0.0491533	0.0457171	1.33992	ABCC2, ABCA5, ABCA6, ABCB4, ABCB5, ABCA9, ABCA7, ABCC9, ABCB9, ABCA8
KEGG_PATHWAY	hsa04820:Cytoskeleton in muscle cells	27	2.36842	0.0038694	550	232	8534	1.80578	0.720709	0.0904557	0.084132	1.07504	FBN2, LAMA2, SDC2, FHL1, LMOD1, FMN2, NID1, THBS2, NID2, SYNE3, SGCE, PDLIM2, CSRP2, LMNA, MYOZ2, MYH10, DTNA, ITGA4, MYH15, ANKRD23, OBSCN, ITGA10, COL4A5, COL6A3, TLN2, COL9A2, SNTB1
KEGG_PATHWAY	hsa00330:Arginine and proline metabolism	10	0.877193	0.00412412	550	50	8534	3.10327	0.743247	0.0904557	0.084132	1.07504	ALDH3A2, GAMT, ALDH4A1, CKMT2, MAOA, PYCR1, SAT2, HOGA1, NOS1, ALDH7A1
KEGG_PATHWAY	hsa00380:Tryptophan metabolism	9	0.789474	0.00469769	550	42	8534	3.32494	0.787578	0.0965963	0.0898434	1.04651	ALDH3A2, MAOA, CAT, CYP1A1, CYP1B1, AOX1, KYAT1, HADH, ALDH7A1
KEGG_PATHWAY	hsa05217:Basal cell carcinoma	11	0.964912	0.00649212	550	63	8534	2.70921	0.882682	0.125642	0.116858	0.932341	BMP4, TCF7L1, WNT11, SMO, FZD4, GADD45A, FZD7, PTCH1, TCF7, AXIN2, KIF7
KEGG_PATHWAY	hsa00561:Glycerolipid metabolism	11	0.964912	0.00810669	550	65	8534	2.62585	0.931297	0.148172	0.137814	0.860708	ALDH3A2, LIPC, DGAT2, AKR1B10, DGKD, AKR1B15, AKR1B1, LPIN1, PLPP2, ALDH7A1, PNLIPRP3
KEGG_PATHWAY	hsa04931:Insulin resistance	15	1.31579	0.00984116	550	109	8534	2.13528	0.961372	0.170408	0.158495	0.799986	PYGB, PRKCB, ACACB, PRKAG3, MAPK10, RPS6KA6, PPP1R3C, TBC1D4, RPS6KA2, TRIB3, CD36, PCK1, SLC27A3, PPARGC1A, CREB5
KEGG_PATHWAY	hsa04936:Alcoholic liver disease	18	1.57895	0.010842	550	144	8534	1.93955	0.972305	0.170621	0.158693	0.799441	TCF7L1, ADH1C, ADH1B, TCF7, SCD5, LY96, CPT1C, ACACB, PRKAG3, ALDH3A2, MAPK10, ADH4, FASN, CD14, LPIN1, PPARGC1A, ALDH7A1, MAP2K6
KEGG_PATHWAY	hsa05207:Chemical carcinogenesis - receptor activation	24	2.10526	0.0109835	550	215	8534	1.73206	0.973578	0.170621	0.158693	0.799441	GSTM4, GSTM3, GSTM2, PAQR5, PRKCB, EPHX2, EPHX1, MGST1, MGST2, GSTT2, ARRB1, FOS, ARRB2, AR, RPS6KA6, FGF7, GSTA4, RPS6KA2, CYP1A1, CYP1B1, PGR, GSTM5, FGF10, CREB5
KEGG_PATHWAY	hsa00340:Histidine metabolism	6	0.526316	0.0114093	550	22	8534	4.23174	0.977069	0.170621	0.158693	0.799441	ALDH3A2, ALDH3A1, MAOA, ALDH3B1, ALDH7A1, ASPA
KEGG_PATHWAY	hsa00565:Ether lipid metabolism	9	0.789474	0.0136229	550	50	8534	2.79295	0.989032	0.194867	0.181244	0.741736	PLA2G12A, JMJD7-PLA2G4B, ENPP2, LPCAT1, ENPP6, PLA2G6, PLPP2, PAFAH1B3, PLB1
KEGG_PATHWAY	hsa04360:Axon guidance	21	1.84211	0.014472	550	184	8534	1.77089	0.991738	0.198388	0.184518	0.73396	NTNG1, SEMA5A, SEMA3A, SEMA6D, PTCH1, SEMA3B, LRRC4, NTN4, SEMA4F, SEMA3E, SEMA4G, EFNA5, RHOD, RGMA, EFNB1, CXCL12, SMO, FYN, SLIT3, PLXNC1, EPHB3
KEGG_PATHWAY	hsa04979:Cholesterol metabolism	9	0.789474	0.0152775	550	51	8534	2.73818	0.993687	0.201051	0.186996	0.728167	CYP27A1, SCARB1, LIPC, NPC1, SORT1, CIDEB, CD36, APOE, LDLRAP1
KEGG_PATHWAY	hsa04974:Protein digestion and absorption	14	1.22807	0.0168031	550	105	8534	2.06885	0.996209	0.212318	0.197475	0.704487	CPB1, KCNE3, COL13A1, COL14A1, SLC1A1, COL12A1, SLC1A5, SLC9A3, SLC7A8, COL4A5, COL21A1, COL6A3, COL8A1, COL9A2
KEGG_PATHWAY	hsa00590:Arachidonic acid metabolism	10	0.877193	0.0186131	550	63	8534	2.46291	0.997932	0.212318	0.197475	0.704487	PLA2G12A, HPGD, GPX4, EPHX2, JMJD7-PLA2G4B, TBXAS1, AKR1C3, PTGR1, PLA2G6, PLB1
KEGG_PATHWAY	hsa05418:Fluid shear stress and atherosclerosis	17	1.49123	0.01871	550	141	8534	1.87077	0.997999	0.212318	0.197475	0.704487	GSTM4, NQO1, GSTM3, GSTM2, IL1R1, SDC2, MGST1, MGST2, GSTT2, FOS, MAPK10, BMP4, GSTA4, GPC1, PECAM1, GSTM5, MAP2K6
KEGG_PATHWAY	hsa00071:Fatty acid degradation	8	0.701754	0.018715	550	43	8534	2.88677	0.998002	0.212318	0.197475	0.704487	ALDH3A2, ADH4, ADH1C, ADH1B, CPT1C, HADH, ACADSB, ALDH7A1
KEGG_PATHWAY	hsa04350:TGF-beta signaling pathway	14	1.22807	0.0208197	550	108	8534	2.01138	0.999014	0.227142	0.211262	0.675178	SMAD3, NRROS, TGFB3, HFE, SMAD9, INHBB, LRRC32, GDF6, GDF5, RGMA, TGFBR2, BMP4, GREM2, ACVR1C
KEGG_PATHWAY	hsa05412:Arrhythmogenic right ventricular cardiomyopathy	12	1.05263	0.0214024	550	86	8534	2.16507	0.999189	0.227142	0.211262	0.675178	SGCE, CACNB2, TCF7L1, DTNA, LAMA2, ITGA4, ITGA10, LMNA, TCF7, ATP2A3, NOS1, SNTB1
KEGG_PATHWAY	hsa00512:Mucin type O-glycan biosynthesis	7	0.614035	0.0257729	550	36	8534	3.01707	0.999814	0.252906	0.235226	0.628515	GALNT11, GALNT5, GALNT13, GALNT15, GALNT17, GCNT3, ST6GALNAC4
KEGG_PATHWAY	hsa04340:Hedgehog signaling pathway	9	0.789474	0.0257819	550	56	8534	2.4937	0.999815	0.252906	0.235226	0.628515	CCND2, SMO, PTCH1, GAS1, ARRB1, ARRB2, EFCAB7, KIF7, CDON
KEGG_PATHWAY	hsa00010:Glycolysis / Gluconeogenesis	10	0.877193	0.0268384	550	67	8534	2.31588	0.99987	0.252906	0.235226	0.628515	ALDH3A2, ALDH3A1, ADH4, ADH1C, ADH1B, HKDC1, ALDH3B1, GALM, PCK1, ALDH7A1
KEGG_PATHWAY	hsa04512:ECM-receptor interaction	12	1.05263	0.0269049	550	89	8534	2.09209	0.999873	0.252906	0.235226	0.628515	TNXB, LAMA2, VWF, ITGA4, ITGA10, LAMA4, LAMA3, COL4A5, COL6A3, COL9A2, CD36, THBS2
KEGG_PATHWAY	hsa01212:Fatty acid metabolism	9	0.789474	0.0283685	550	57	8534	2.44995	0.999923	0.259257	0.241132	0.617744	FADS2, ELOVL4, FASN, TECR, SCD5, CPT1C, HADH, ACADSB, FADS1
KEGG_PATHWAY	hsa04310:Wnt signaling pathway	19	1.66667	0.0306592	550	174	8534	1.69432	0.999964	0.272618	0.25356	0.59592	TLE3, TCF7L1, SMAD3, FZD4, PRKCB, FZD7, TCF7, LRP5, AXIN2, APCDD1, DKK1, MAPK10, FRAT1, SFRP1, SFRP2, WNT11, CCND2, ROR1, ROR2
KEGG_PATHWAY	hsa04060:Cytokine-cytokine receptor interaction	28	2.45614	0.043945	550	298	8534	1.45791	1	0.380471	0.353873	0.451153	TNFRSF11B, EDA2R, GHR, IL1RL2, ACVR1C, IL36B, IL21R, IL6R, GDF11, XCR1, TSLP, TGFB3, IL11RA, IL1R1, GDF15, IL34, TNFSF12, TNFRSF10C, IL16, INHBB, GDF6, GDF5, TGFBR2, TNFRSF10D, BMP4, CXCL12, LEP, IL17D
KEGG_PATHWAY	hsa04010:MAPK signaling pathway	28	2.45614	0.0470088	550	300	8534	1.44819	1	0.39225	0.364828	0.437912	ARRB1, ARRB2, EFNA5, RPS6KA6, FGF7, RPS6KA2, PDGFD, CD14, MAP3K6, MAP2K6, DUSP4, TGFB3, PRKCB, IL1R1, GADD45A, FOS, PGF, DUSP6, TGFBR2, MAPK10, CACNB2, NR4A1, KITLG, JMJD7-PLA2G4B, KIT, MAPT, FGF10, MAP3K12
KEGG_PATHWAY	hsa00140:Steroid hormone biosynthesis	9	0.789474	0.0476899	550	63	8534	2.21662	1	0.39225	0.364828	0.437912	CYP11A1, AKR1C1, AKR1C3, CYP1A1, CYP1B1, HSD11B1L, AKR1C2, HSD17B11, CYP7B1
KEGG_PATHWAY	hsa01524:Platinum drug resistance	10	0.877193	0.0503602	550	75	8534	2.06885	1	0.403979	0.375738	0.425115	GSTM4, GSTM3, GSTM2, ABCC2, GSTA4, MGST1, REV3L, MGST2, GSTT2, GSTM5
KEGG_PATHWAY	hsa05410:Hypertrophic cardiomyopathy	12	1.05263	0.0525308	550	99	8534	1.88077	1	0.403979	0.375738	0.425115	SGCE, CACNB2, DTNA, LAMA2, ITGA4, TGFB3, ITGA10, LMNA, ATP2A3, NOS1, PRKAG3, SNTB1
KEGG_PATHWAY	hsa05224:Breast cancer	16	1.40351	0.0530782	550	148	8534	1.67744	1	0.403979	0.375738	0.425115	JAG2, NOTCH3, TCF7L1, FZD4, GADD45A, FZD7, TCF7, LRP5, FOS, AXIN2, FRAT1, FGF7, WNT11, KIT, PGR, FGF10
KEGG_PATHWAY	hsa03320:PPAR signaling pathway	10	0.877193	0.0540276	550	76	8534	2.04163	1	0.403979	0.375738	0.425115	CYP27A1, FADS2, ACOX2, SCD5, ME1, PLIN2, PPARG, CD36, CPT1C, PCK1
KEGG_PATHWAY	hsa05208:Chemical carcinogenesis - reactive oxygen species	22	1.92982	0.0584857	550	227	8534	1.50379	1	0.427595	0.397703	0.400441	GSTM4, NQO1, GSTM3, GSTM2, EPHX2, AKR1C1, EPHX1, MGST1, AKR1C3, MGST2, GSTT2, NDUFC2, AKR1C2, FOS, MAPK10, AS3MT, GSTA4, CAT, CYP1A1, CYP1B1, SLC26A9, GSTM5
KEGG_PATHWAY	hsa04020:Calcium signaling pathway	24	2.10526	0.0598189	550	254	8534	1.46611	1	0.427835	0.397926	0.400198	CHRM3, MCOLN3, PRKCB, PDE1A, ATP2A3, ATP2B4, HTR2B, PHKA1, HTR2A, TPCN1, ITPKB, P2RX6, GNA14, FGF7, GRIN2A, GNAL, EDNRB, PDGFD, BDKRB2, NOS1, CAMK1, PLCD3, PLCD4, FGF10
KEGG_PATHWAY	hsa00051:Fructose and mannose metabolism	6	0.526316	0.0642502	550	34	8534	2.73818	1	0.446831	0.415593	0.381332	PFKFB2, AKR1B10, GMDS, AKR1B15, HKDC1, AKR1B1
KEGG_PATHWAY	hsa00564:Glycerophospholipid metabolism	12	1.05263	0.0662728	550	103	8534	1.80773	1	0.446831	0.415593	0.381332	PLA2G15, PLA2G12A, PCYT2, DGKD, CHKA, JMJD7-PLA2G4B, LPCAT1, GPD1L, LPIN1, PLA2G6, PLPP2, PLB1
KEGG_PATHWAY	hsa05032:Morphine addiction	11	0.964912	0.0665492	550	91	8534	1.8756	1	0.446831	0.415593	0.381332	GABRB1, PRKCB, PDE1A, GNG7, PDE3B, PDE3A, ADORA1, ARRB1, ARRB2, PDE7B, GABRE
KEGG_PATHWAY	hsa04924:Renin secretion	9	0.789474	0.0740354	550	69	8534	2.02387	1	0.487153	0.453097	0.343809	PTGER4, GUCY1A2, PDE1A, PDE3B, PDE3A, CLCA2, ADORA1, KCNJ2, AQP1
KEGG_PATHWAY	hsa00360:Phenylalanine metabolism	4	0.350877	0.0793073	550	16	8534	3.87909	1	0.51161	0.475844	0.322535	ALDH3A1, MAOA, ALDH3B1, HPD
KEGG_PATHWAY	hsa00592:alpha-Linolenic acid metabolism	5	0.438596	0.0822544	550	26	8534	2.98392	1	0.520418	0.484036	0.315123	FADS2, PLA2G12A, JMJD7-PLA2G4B, PLA2G6, PLB1
KEGG_PATHWAY	hsa01040:Biosynthesis of unsaturated fatty acids	5	0.438596	0.0918886	550	27	8534	2.8734	1	0.559844	0.520706	0.283407	FADS2, ELOVL4, TECR, SCD5, FADS1
KEGG_PATHWAY	hsa00120:Primary bile acid biosynthesis	4	0.350877	0.0918893	550	17	8534	3.65091	1	0.559844	0.520706	0.283407	CYP39A1, CYP27A1, ACOX2, CYP7B1

## Sheet: wPGSA
TF	Number_of_ChIPexp.x	q_value_mean	t_score_mean
IRF1	55	1.32017e-49	15.2887
IRF9	55	2.66105e-32	12.3532
NFKB2	40	4.1694e-19	9.5485
NFKB1	40	4.99036e-18	9.25856
STAT2	92	3.71573e-17	9.01541
STAT5B	23	5.1947e-15	8.43779
RELA	326	6.54882e-15	8.38641
REL	11	3.25567e-11	7.30227
RELB	16	2.00539e-10	7.03552
IRF4	46	1.81239e-09	6.70418
IRF8	10	3.9618e-09	6.57857
STAT1	97	1.34427e-07	6.0136
BATF	26	1.28235e-06	5.6233
HIF1A	130	1.32587e-06	5.60417
IKZF1	35	1.78244e-06	5.5405
LYL1	13	1.99741e-06	5.51003
RUNX3	18	2.58944e-06	5.45238
SPI1	197	3.11722e-06	5.40888
AFF1	56	9.88545e-06	5.17896
MEF2B	22	9.88545e-06	5.18005
CREBBP	65	3.79178e-05	4.91212
IRF2	7	4.17617e-05	4.88447
CEBPA	80	4.86205e-05	4.84496
POU2F2	23	5.62039e-05	4.80296
STAT3	149	5.62039e-05	4.79944
ZNF366	12	5.7006e-05	4.78908
ATF4	82	5.93234e-05	4.76588
FLI1	102	5.93234e-05	4.76907
BATF3	12	6.30769e-05	4.74688
DLX5	4	7.98035e-05	4.69197
IKZF2	6	0.0001515	4.5517
BCL6	36	0.000163217	4.52934
IRF2BP2	14	0.000181099	4.50367
SMAD2	46	0.000206662	4.46619
ZBED1	4	0.000241774	4.42815
TBX21	6	0.000257438	4.40663
ARNT	87	0.000399631	4.29823
KMT2A	137	0.000399631	4.30345
MLLT1	26	0.0005634	4.21597
HMGA1	23	0.000692213	4.16337
TBP	51	0.000750011	4.13909
SRSF3	4	0.000925007	4.08848
SMAD5	5	0.000988532	4.06451
EPAS1	73	0.00146586	3.96583
INTS10	20	0.00151714	3.95242
CEBPB	142	0.00160591	3.93302
EED	13	0.00164417	3.91665
ETS1	67	0.00164417	3.91855
JMJD1C	4	0.00164417	3.91247
MEF2C	18	0.00175763	3.88993
XPO1	15	0.00175763	3.88766
PHF2	2	0.00187715	3.86221
POU2AF1	12	0.00187715	3.86135
FOXL2	40	0.00208055	3.83123
AFF4	53	0.00254932	3.77654
ETV3	2	0.00256578	3.77075
LMNB1	94	0.00296446	3.72972
MLLT3	16	0.0031478	3.71032
PAX5	20	0.0031478	3.70565
THOC5	1	0.00330939	-4.7313
GTF2B	16	0.00359638	3.66351
NFATC1	12	0.0043996	3.60726
ELF3	11	0.00450143	3.59582
MEF2A	5	0.00450143	3.59321
STAT4	8	0.00451642	3.59301
DOT1L	30	0.00452795	3.5832
BRD1	6	0.00455558	3.57804
FBP1	1	0.00457475	-4.59004
CTBP2	20	0.00469787	3.56192
FOXP1	25	0.00477858	3.55364
SKI	8	0.00479498	3.54908
BRD7	22	0.00576951	3.49626
CIITA	5	0.00631632	3.48052
ERG	120	0.00633365	3.46091
GTF2F1	24	0.00633365	3.45952
PRDM1	13	0.00633365	3.45701
MEN1	61	0.00688233	3.43091
TEAD4	76	0.00691388	3.42591
CHD1	27	0.00699883	3.41933
RUNX1	176	0.00727375	3.40517
GABPA	43	0.00741025	3.3968
PML	16	0.00742128	3.3931
CDK6	2	0.00813253	3.35532
CDK8	38	0.00813253	3.35302
DPF2	29	0.00813253	3.35532
ERCC3	1	0.00813253	3.35993
SOX17	40	0.00813253	3.34842
TBL1XR1	5	0.00813253	3.35101
EZH2	314	0.00860766	3.32932
MYB	39	0.00927862	3.30532
CDK7	9	0.00940261	3.29864
BRD3	78	0.00974372	3.28543
POU2F3	14	0.00977968	3.28142
TLE3	36	0.0105563	3.25662
FOXO1	25	0.0108503	3.24372
TAF7	5	0.0108503	3.24307
BRD4	796	0.0111086	3.22437
ELF4	9	0.0111086	3.22559
FOS	70	0.0111086	3.22775
PHF13	1	0.0111086	-3.55981
ZNF384	9	0.0123839	3.19032
TEAD1	61	0.013063	3.17194
MYH11	10	0.0133987	3.16182
SOX2	80	0.0136366	3.15379
EBF1	32	0.0138217	3.14701
NELFB	8	0.0139164	3.14132
TCF3	19	0.0139164	3.1395
WDR77	4	0.0153289	3.10862
SRF	33	0.0154007	3.10421
NPM1	38	0.0181018	3.05341
DLX6	6	0.0186138	3.04238
CBFB	16	0.0195071	3.0227
VGLL1	6	0.0195071	3.02328
INO80	13	0.0201394	3.01075
DDX5	6	0.0202815	3.00427
PBRM1	36	0.0202815	3.00198
RUNX1T1	19	0.0202815	3.00034
MAFB	14	0.0204618	2.99509
DDIT3	21	0.0208111	2.98729
RB1	38	0.0213457	2.97701
ATF7	18	0.021697	2.96765
ELK1	14	0.021697	2.96673
SMAD1	42	0.021697	2.96432
ELF1	29	0.0227297	2.94598
GATA3	203	0.0227297	2.94003
MECOM	23	0.0227297	2.94039
MTA3	8	0.0227297	2.94435
INTS6	2	0.0239788	2.92132
NFKBIZ	4	0.0246355	2.91078
WAPL	3	0.0248475	2.90598
NCOR1	25	0.0250869	2.8997
HMG20B	7	0.0264135	2.88128
NELFE	51	0.0264572	2.87738
PHF12	1	0.0264572	2.88332
TLX3	5	0.0264797	2.87339
MED26	14	0.0273747	2.86038
LIN9	8	0.02833	2.84739
ERCC2	1	0.0290489	2.83423
MAML1	7	0.0290489	2.82679
NBN	8	0.0290489	2.82798
NFATC3	8	0.0290489	2.82348
PROX1	6	0.0290489	2.83523
RAG1	5	0.0290489	2.82773
SREBF1	20	0.0290489	2.8233
HOXB13	101	0.0291422	2.81988
ZNF668	3	0.029434	2.81492
INTS12	2	0.0300494	2.80356
MEF2D	11	0.0300494	2.80512
ATF2	14	0.0303478	2.79725
CTNNB1	77	0.0303478	2.79396
LEO1	30	0.0303478	2.79337
THAP12	2	0.0303478	2.7928
BCL11B	14	0.0316448	2.77596
ARID1B	20	0.0318043	2.76802
CDK9	83	0.0318043	2.76993
MED1	255	0.0318043	2.76795
VDR	63	0.0318917	2.76508
EP300	429	0.0337667	2.74417
ATF1	32	0.0337727	2.74069
PBXIP1	2	0.0337727	2.74029
CDC45	9	0.0365916	2.69251
E2F3	4	0.0365916	2.69059
FOXA2	134	0.0365916	2.68589
GFI1	10	0.0365916	2.68784
HMGB2	5	0.0365916	2.68584
MCM7	8	0.0365916	2.69244
MECP2	32	0.0365916	2.69797
NCOR2	14	0.0365916	2.69682
NFATC2	8	0.0365916	2.69442
PLRG1	2	0.0365916	2.76982
PSIP1	13	0.0365916	2.71003
SMAD4	37	0.0365916	2.69335
SSRP1	16	0.0365916	2.68842
TP63	104	0.0365916	2.69749
NFRKB	10	0.038772	2.66488
MED12	55	0.0391695	2.65896
PBX4	1	0.0397638	2.65011
TFAP4	22	0.0397638	2.65129
INTS3	16	0.0405395	2.64024
ZBTB11	14	0.0405395	2.63985
CCND2	2	0.0424973	2.62039
MEIS1	17	0.0424973	2.61992
BCLAF1	10	0.0428811	2.61509
ACTR5	2	0.0430724	2.61086
ETV6	67	0.0430724	2.61047
SETD1A	24	0.0439894	2.60077
JARID2	29	0.0453603	2.58836
PAX6	4	0.0461875	2.58115
TCF7	35	0.0462572	2.57788
ZBTB40	12	0.0474476	2.56734
NME2	2	0.0475394	2.56522
HBP1	4	0.0475599	2.5631
SKIL	5	0.0478707	2.55887
MXD1	8	0.0483206	2.55376
BRD9	50	0.0518352	2.52553
CEBPD	12	0.0518352	2.52621
SUZ12	192	0.052943	2.51626
COPS2	4	0.0530813	-2.5445
KLF4	40	0.0530813	2.51179
ALOX5	6	0.0533105	2.51714
FANCD2	16	0.0537729	2.50395
RING1	20	0.0537761	2.50195
FOXO3	29	0.0539518	-2.52163
TCF4	29	0.0539518	2.49875
CNBP	1	0.0539878	-2.95167
GTF2E2	2	0.0539878	2.49481
TP53BP1	13	0.0539878	2.49186
ELK4	9	0.0541655	2.48785
INTS13	30	0.0541655	2.48803
HDAC1	97	0.0544182	2.48389
CREM	8	0.0544223	2.47718
FOXC1	31	0.0544223	2.48
HEY2	1	0.0544223	-2.58979
TLX1	2	0.0544223	2.48266
NAT10	2	0.0551889	-2.6957
E2F8	7	0.0562217	2.4626
HIC1	4	0.057082	2.45519
ASH2L	9	0.0594305	2.43891
MCRS1	6	0.0607772	2.42978
MAF	10	0.0629961	2.41417
RBM39	10	0.0629961	2.41287
POU5F1	72	0.0631525	2.41021
NUTM1	26	0.0639704	2.40396
KLF6	6	0.0639992	2.40219
BRPF3	3	0.0652687	2.3917
ZNF12	6	0.0652687	2.39205
ETV5	5	0.0659081	2.38525
SREBF2	22	0.0659081	2.38478
ETV1	14	0.0664487	2.38024
ATXN7L3	4	0.0685674	2.36283
DCP1A	5	0.0685674	2.36241
OTX2	31	0.0685674	2.36218
TCF12	27	0.0685674	2.36561
LBX2	2	0.0686379	2.36038
PAF1	107	0.0690441	2.35648
ZNF750	1	0.0709724	2.34483
ARID2	49	0.0730451	2.33069
E2F2	3	0.0730451	2.33109
JUNB	91	0.0744974	2.32171
NETO2	6	0.0749099	2.31813
SETD7	1	0.0761946	-2.43521
MYF5	1	0.0797854	2.29131
RTF1	10	0.0797961	2.28979
CEBPG	8	0.0803698	2.28523
KDM3A	6	0.0805591	2.28285
GTF2A2	6	0.0808392	2.28013
HMBOX1	4	0.0810968	2.27302
KMT2B	14	0.0810968	2.27208
MLLT6	1	0.0810968	2.27226
S100A10	2	0.0810968	-3.03603
ZNF518A	2	0.0810968	2.27428
DR1	3	0.0827606	2.26188
KDM4B	10	0.0828091	2.26006
PRMT1	4	0.0832664	2.25488
TRIM24	15	0.0832664	2.25616
FOSL1	46	0.0835126	2.25025
NR4A1	26	0.0835126	2.25064
TCF7L2	35	0.0835126	2.24913
ATF3	42	0.0844556	2.23834
CBX5	29	0.0844556	2.23525
LMO2	14	0.0844556	2.23678
MYC	356	0.0844556	2.24219
NANOG	51	0.0844556	2.23297
RNF2	196	0.0844556	2.23646
SMAD3	44	0.0844556	2.23327
ZNF485	2	0.0844556	2.24183
BCL3	37	0.0861875	2.22096
DEK	7	0.0861875	2.22132
PBX1	13	0.0861875	2.22091
NELFA	30	0.088013	2.21116
SFPQ	22	0.0882166	2.20877
TAL1	70	0.0898852	2.20001
BHLHE41	3	0.0907461	2.19508
ETV4	7	0.0910131	2.19236
BHLHE40	24	0.0927903	2.1832
ZC3H4	9	0.09286	2.18164
CBX3	45	0.0946757	2.17191
ELK3	3	0.0946757	2.17125
ZNF768	8	0.0946757	2.16952
ZHX2	8	0.0952188	2.16586
ZNF781	4	0.0955437	2.16321
RBBP5	13	0.0955643	2.1616
NKRF	8	0.0956839	2.15979
EP400	7	0.096037	2.15686
JUND	52	0.0962736	2.15199
RUVBL1	5	0.0962736	2.15059
TAF1	28	0.0962736	2.15145
ZNF316	4	0.0962736	2.15422
ZKSCAN1	7	0.0968472	2.14678
CDT1	8	0.0974438	2.14268
EHF	8	0.0981293	2.13729
ZNF34	4	0.0981293	2.13868
ZSCAN29	9	0.0981848	2.13564
HDAC6	32	0.0985455	2.13164
ZNF24	18	0.0985455	2.13274
NFAT5	3	0.0993834	2.12673
YY1	83	0.0994285	2.125
CDX2	11	0.101037	2.11737
LMO3	1	0.101349	2.11474
WWTR1	15	0.101349	2.11329
GATA2	92	0.10178	2.11015
PRPF4	6	0.104169	2.0997
ATRX	19	0.104202	2.09799
ZNF230	2	0.104285	2.0964
ONECUT2	10	0.105104	2.09177
MIF	2	0.108717	2.07819
NCBP1	4	0.109662	2.07179
CXXC1	12	0.110083	2.06885
NR3C1	466	0.110959	2.0642
ZBTB25	2	0.112296	2.05709
ZMIZ1	9	0.112296	2.0568
HIVEP1	4	0.116188	2.04124
NRP2	2	0.118004	2.03471
ESRRG	8	0.121697	-2.01935
AEBP2	8	0.122169	-2.01848
CASZ1	6	0.122337	2.0115
ING5	2	0.122337	2.01066
KAT2B	10	0.122337	2.0126
TP73	7	0.122337	2.01057
ZNF83	5	0.125996	1.99676
DDX39B	2	0.127683	-2.08127
NFIC	7	0.127683	1.98851
ZNF687	6	0.127683	1.98808
HOXC5	3	0.1288	1.98075
MTF2	16	0.1288	1.97934
PSMB5	1	0.1288	1.98237
RFX5	11	0.1288	1.97695
STAG1	103	0.1288	1.98039
ARID1A	76	0.129847	1.96608
FOXA1	745	0.129847	1.96444
N6AMT1	2	0.129847	1.9697
RUNX2	12	0.129847	1.96459
USP7	9	0.129847	1.97003
ZNF114	4	0.129847	1.9729
ZNF33A	2	0.129847	1.96693
NELFCD	16	0.12993	1.96293
DYRK1A	8	0.131594	1.95621
ZBTB48	18	0.13289	1.95073
BRPF1	3	0.133517	1.94768
PRRX1	16	0.133847	1.94513
IRF3	21	0.134471	1.94186
ZNF646	2	0.135266	1.93822
HBZ	2	0.135921	1.93902
MGMT	1	0.135921	1.93421
ZNF431	2	0.136113	1.93164
DZIP1	2	0.137342	1.92398
LDB1	16	0.137342	1.92493
RBPJ	53	0.137342	1.92407
RCOR1	23	0.139804	1.91496
E2F4	13	0.143777	1.90036
JUN	205	0.143777	1.89774
MCM5	18	0.143777	-1.91526
ZNF572	2	0.143777	1.89788
BCORL1	4	0.1446	1.89401
ASCL2	4	0.144675	1.89137
G3BP1	1	0.144675	1.89213
GATAD2B	23	0.145624	1.88722
ERF	13	0.146426	1.88357
SUPT5H	112	0.147683	1.87856
TBL1Y	5	0.148613	1.87468
FOXK2	15	0.149984	1.86809
ZNF816	2	0.149984	1.86926
BANF1	4	0.150853	1.86442
TAF15	12	0.151838	1.859
TAF9B	2	0.151838	1.85966
ZNF225	2	0.152108	1.85693
ERBB2	4	0.153494	1.85203
QSER1	6	0.153494	1.85043
BCL11A	12	0.155566	1.84209
CARM1	11	0.155566	1.8418
E2F7	8	0.155566	1.83972
E4F1	12	0.155566	1.84001
ZNF703	2	0.156311	1.83638
PIAS1	24	0.156455	1.83349
TRIM25	10	0.156455	1.83364
GRHL2	43	0.156729	1.83149
ZNF608	4	0.158334	1.82576
ETV2	2	0.158401	1.82459
ZNF276	2	0.158401	1.82324
ZNF395	3	0.16066	1.81558
KAT7	12	0.160683	1.8132
RFXANK	2	0.160683	1.81268
ZNF772	2	0.160683	1.81193
EMSY	2	0.163914	1.80172
AR	992	0.166687	1.79283
SRCAP	1	0.167719	1.80221
GATA4	39	0.168587	1.78529
KMT2D	47	0.168833	1.78345
EGR1	83	0.169343	1.78088
FOXP4	2	0.170652	1.77621
ZNF296	2	0.171156	1.77372
ZFP41	4	0.171845	1.77079
ZNF280D	5	0.171885	1.7694
BANP	6	0.172544	1.76528
ZNF146	3	0.172544	1.76657
SS18	38	0.172855	1.76322
ZNF224	2	0.17322	1.76042
ZNF430	2	0.17322	1.75996
CBX8	24	0.173529	1.75933
VPS72	1	0.175998	1.75073
CBX2	13	0.177513	1.73888
ERH	2	0.177513	-2.58525
MAZ	36	0.177513	1.73597
MPHOSPH8	19	0.177513	1.74319
ZBED2	3	0.177513	1.73624
ZNF142	2	0.177513	1.73653
ZNF319	2	0.177513	1.74395
ZNF333	2	0.177513	1.73804
ZZZ3	8	0.177513	1.73855
SMARCB1	51	0.177823	1.73337
ZMYND8	32	0.177823	1.7328
BAP1	29	0.178685	1.72754
MAML3	4	0.178685	1.73253
ZNF441	2	0.178685	1.7293
ZNF737	2	0.178745	1.7259
MIER3	2	0.178992	1.7196
MYOCD	1	0.178992	1.71986
SALL3	1	0.178992	1.72368
TCF19	2	0.178992	1.72201
ZNF121	4	0.178992	1.72324
MAFK	15	0.179051	1.7183
HNRNPLL	6	0.179845	1.71509
IKZF3	4	0.181743	1.70905
PPARA	11	0.182038	1.70712
ZNF354C	4	0.182203	1.7084
MYBL2	17	0.183559	1.70099
SMC2	12	0.185198	-1.73419
METTL14	9	0.187153	1.68955
MTA2	22	0.187153	1.68843
AHDC1	2	0.187203	1.68392
HOXA5	3	0.187203	1.68474
SMARCA4	326	0.187203	1.6856
ZNF839	2	0.187203	1.68523
TARDBP	18	0.188271	1.68009
BAHCC1	3	0.188984	1.67715
NAB2	4	0.189705	1.67306
SNAI2	33	0.189705	1.67094
UBTF	12	0.189705	1.67295
ZNF556	2	0.189705	1.67165
ZNF619	2	0.189963	1.66928
PCF11	9	0.190277	-1.6675
FGFR1	15	0.190667	1.66526
FOSL2	75	0.191636	1.66171
TFDP1	8	0.192915	1.65635
ZNF329	2	0.192915	1.6567
SUMO2	65	0.193472	1.65386
ILF3	3	0.193615	1.65249
NR2C2	21	0.193999	1.65041
ARID4B	7	0.194234	1.64873
RFXAP	2	0.194495	1.64703
CDK12	8	0.195129	1.64289
ZNF451	2	0.195129	1.64384
ZNF639	13	0.195129	1.64223
FOXK1	11	0.196807	1.63496
NEUROD1	21	0.196807	1.62819
RARA	60	0.196807	1.6335
SMARCC1	84	0.196807	1.62633
SNAPC1	2	0.196807	1.63031
TERT	1	0.196807	1.62938
ZNF341	8	0.196807	1.62669
ZNF48	4	0.196807	1.62755
ZNF644	5	0.196807	1.62837
ZNF697	4	0.196807	1.63309
ZNF709	2	0.196807	1.63699
HDAC2	79	0.197022	1.6237
KDM5A	15	0.197022	1.62397
TIGD6	2	0.199183	1.61661
ZNF605	2	0.199183	1.61628
EEA1	2	0.199696	1.61399
ATAD3A	2	0.202713	1.60183
BCOR	29	0.202713	1.6037
DIDO1	2	0.202713	1.60479
HCFC1	26	0.202713	1.60138
ISL2	3	0.202713	1.603
PABPC1	2	0.202865	-1.6759
FMR1	2	0.203399	1.5994
ZNF776	4	0.203399	1.59658
FOXA3	6	0.203941	1.58905
GMEB2	3	0.203941	1.5896
MBD3	14	0.203941	1.59365
NKX2-1	21	0.203941	1.58926
WAS	2	0.203941	1.59062
ZNF784	2	0.203941	1.59321
MEPCE	2	0.204232	-1.61153
RBM14	3	0.204505	1.58777
GMEB1	6	0.205224	1.58184
SETDB1	14	0.205224	1.58252
CAMTA2	4	0.208078	1.57338
RXRA	37	0.208078	1.57288
ARHGAP35	4	0.210327	1.56452
NUP98	15	0.210327	1.56575
ZNF615	2	0.210327	1.56478
BCL10	6	0.211326	-1.57726
LCOR	3	0.21177	1.55899
ZNF317	2	0.211837	1.5575
ZNF7	4	0.211837	1.55681
ZNF512	4	0.215961	1.54625
POGZ	2	0.216268	1.5433
TBX3	4	0.216268	1.54419
ZNF432	2	0.216581	1.54189
KLF1	9	0.216925	1.53972
INSR	7	0.217305	1.53507
MEIS2	4	0.217305	1.53522
OSR1	2	0.217305	1.55195
PHF8	23	0.217305	1.53732
BRCA1	31	0.217358	1.53258
E2F5	4	0.217358	1.53169
VEZF1	4	0.217358	1.53296
BRD2	118	0.21762	1.53005
ATF6	10	0.217749	1.52687
BACH2	7	0.217749	1.52736
ZNF438	2	0.217749	1.52943
HES4	3	0.220082	1.51934
ZNF326	2	0.220082	-1.52267
KLF5	41	0.221195	1.51459
NR0B2	2	0.221195	1.51514
RUVBL2	21	0.221195	1.51376
LMO1	3	0.223441	1.50894
MEOX2	1	0.223441	-2.43198
ZNF699	2	0.22408	1.51548
LCORL	5	0.224186	1.5029
SIN3B	6	0.224645	1.50096
LARP7	13	0.226363	1.49592
ELF2	4	0.226392	1.49408
GTF3C2	14	0.226392	1.49452
MXD3	3	0.226625	1.48945
SRSF7	4	0.226625	1.49174
ZNF407	6	0.226625	1.49165
ZNF678	2	0.226625	1.49052
ZMYM3	7	0.227072	1.48733
ZNF550	2	0.227072	1.4847
ZNF792	4	0.227072	1.48538
ZNF800	4	0.227072	1.48487
CD74	7	0.227105	1.4853
NOTCH1	38	0.227105	1.48248
GLI1	10	0.227726	-1.48893
MAFF	6	0.227726	1.47752
PAX8	17	0.227726	1.47571
ZNF530	4	0.227726	1.48034
ZNF584	2	0.227726	1.47663
ZNF865	2	0.227726	1.47606
HLF	3	0.228797	1.47073
PRDM15	4	0.228797	1.46903
SRSF1	6	0.228797	1.46901
ZNF124	2	0.228797	1.46946
FXR1	2	0.229071	-1.46523
MTA1	13	0.229071	1.46423
NFIL3	2	0.229071	1.46262
PBX3	5	0.229071	1.46259
TSC22D4	2	0.229071	-1.46876
UBP1	2	0.229071	1.46564
ZNF318	6	0.229366	1.46103
TFDP2	2	0.229932	1.45779
ZBTB38	2	0.229932	1.45871
DONSON	1	0.230425	-1.47944
GABPB1	4	0.231162	1.45212
TFAP2C	45	0.231162	1.4527
KLF3	2	0.232057	1.44914
PKNOX1	8	0.232223	1.44782
DDX21	7	0.232612	1.43863
HSPA1A	1	0.232612	1.43935
IRF5	12	0.232612	1.44181
NAIF1	2	0.232612	1.44199
PRTN3	1	0.232612	1.4489
RBM25	8	0.232612	1.43852
SNRNP70	6	0.232612	-1.44781
ZBTB21	5	0.232612	1.44095
ZNF205	2	0.232612	1.43851
FOXP3	4	0.232865	1.43663
ZNF143	37	0.232865	1.43637
ZNF777	4	0.232865	1.43512
IKZF5	3	0.233154	1.4326
KANSL1	4	0.233154	1.4332
MYRF	6	0.233783	1.4304
ZFP91	4	0.234533	1.4276
ZNF782	2	0.234797	1.42611
SOX9	27	0.23538	1.42305
ZFP3	6	0.23538	1.42295
CXXC5	7	0.235759	1.42113
SMC1B	5	0.235815	1.42067
THAP8	2	0.235944	1.41896
SOX4	3	0.236157	1.42048
ZNF232	2	0.236158	1.41655
AHRR	2	0.23664	-1.41552
KDM5B	54	0.236758	1.41169
ZMAT5	2	0.236758	1.41218
ZNF257	2	0.236758	1.41401
HOXA4	1	0.236772	1.41058
CDC16	3	0.237353	-1.42474
CREB1	71	0.237353	1.40304
HOMEZ	6	0.237353	1.40291
HOXD1	3	0.237353	1.40654
MAF1	6	0.237353	1.40403
SMC1A	96	0.237353	1.40619
ZBTB4	5	0.237353	1.40599
HNF1A	20	0.238117	1.40025
MSC	1	0.239848	-1.51037
MTOR	6	0.239848	1.39501
PHOX2B	12	0.239848	1.39401
ZNF710	2	0.240081	1.3922
FUBP1	2	0.240431	1.38932
PHF21A	4	0.240431	1.38947
VRK1	1	0.240431	-1.56777
ZNF33B	2	0.241092	1.38641
NR4A3	4	0.244549	1.45271
ZNF547	4	0.245469	1.37474
THAP9	2	0.245658	1.37341
HNF1B	15	0.246017	1.3701
SMARCC2	15	0.246017	1.37088
ZHX3	5	0.246017	1.36998
TET1	9	0.24648	1.36768
YY2	4	0.24648	1.3672
ASXL1	10	0.246603	1.35932
CNOT3	3	0.246603	1.35711
CPSF4	4	0.246603	1.36053
EOMES	8	0.246603	1.35794
HMGB1	7	0.246603	1.35771
HOXA6	1	0.246603	1.35916
IKZF4	2	0.246603	1.36108
MSX2	5	0.246603	1.34933
PTTG1	2	0.246603	1.35162
RFX3	4	0.246603	-1.35252
SAP30	7	0.246603	1.34976
SATB1	7	0.246603	1.35874
SMARCA2	29	0.246603	1.35343
SNAPC4	7	0.246603	1.35413
WIZ	3	0.246603	1.34921
XRCC6	14	0.246603	1.36152
ZIK1	4	0.246603	1.35265
ZNF460	2	0.246603	1.35693
ZNF516	1	0.246603	-1.41479
ZXDC	2	0.246603	1.35855
E2F1	60	0.24708	1.34719
SOX13	7	0.249208	1.34157
RBBP7	2	0.249628	1.33977
FIP1L1	14	0.25308	1.33131
GLI4	4	0.253594	1.32931
CCAR2	6	0.253877	1.31936
CCNT1	28	0.253877	1.31472
CIC	2	0.253877	1.31824
CSNK2A1	7	0.253877	1.31907
DAXX	5	0.253877	1.31445
HECTD1	2	0.253877	1.30673
HEXIM1	9	0.253877	1.3099
JRK	2	0.253877	1.30959
KLF12	2	0.253877	1.30473
SIN3A	25	0.253877	1.31928
STAT6	3	0.253877	1.31417
TBPL1	2	0.253877	1.32326
WRNIP1	4	0.253877	1.32597
XRCC1	1	0.253877	1.3178
YEATS2	3	0.253877	1.31921
YEATS4	4	0.253877	1.31105
ZBTB16	6	0.253877	1.31907
ZBTB39	3	0.253877	1.30661
ZFX	39	0.253877	1.31529
ZMAT3	2	0.253877	1.30966
ZNF138	4	0.253877	1.30999
ZNF264	4	0.253877	1.30788
ZNF417	2	0.253877	-1.32721
ZNF44	2	0.253877	1.30844
ZNF503	2	0.253877	1.31808
ZNF616	2	0.253877	1.30484
ZNF691	2	0.253877	1.31362
ZNF766	4	0.253877	1.32454
CHAF1A	7	0.254521	1.30236
HAND1	7	0.255517	1.29665
NKX3-1	5	0.255517	1.29745
ZNF280B	4	0.255517	1.29832
ZNF426	2	0.255517	1.29839
NUP93	2	0.255845	-1.31613
RBM22	6	0.255845	1.29486
ZFP37	4	0.255845	1.29343
PLSCR1	2	0.256987	1.29016
ZNF219	3	0.257124	1.28889
NRL	2	0.25784	1.28646
CTSG	1	0.258644	-1.30183
ZNF598	2	0.258644	1.28312
FOXJ3	8	0.258657	1.28172
MBD4	2	0.258657	1.28136
HMGN1	1	0.259435	1.27665
NR2C1	6	0.259435	1.27666
RORA	2	0.259435	1.27736
SOX1	7	0.259435	1.28025
SOX10	7	0.259774	1.27467
DMAP1	2	0.262413	1.26806
NIPBL	41	0.262497	1.26702
ZNF609	2	0.262748	1.26565
HSF1	119	0.263861	1.26237
DDX17	5	0.265779	1.25747
GGCT	1	0.266364	-1.8241
SMARCAL1	3	0.266364	-1.31371
TBX2	6	0.26687	1.2525
SETD2	2	0.268526	1.24809
NCOA6	2	0.269065	1.24539
ZNF883	2	0.269065	1.24568
ARID4A	2	0.269792	1.2412
TRMT13	1	0.269792	-1.2571
ZNF629	4	0.269792	1.24205
GTF2I	19	0.271418	1.23274
MAP1LC3B	3	0.271418	-1.24817
MAX	78	0.271418	1.23405
RAG2	1	0.271418	1.23355
ZNF148	4	0.271418	1.23625
ZNF221	4	0.271418	1.23592
HMGXB3	3	0.271912	1.2297
MAU2	14	0.271912	1.22836
SP110	2	0.271912	1.23008
UPF1	1	0.271912	-1.22929
EHMT2	31	0.272434	1.22563
KAT8	10	0.272434	1.2256
HNRNPH1	6	0.272489	1.22372
JAZF1	7	0.272489	1.22312
XBP1	22	0.272489	1.22406
TRAFD1	2	0.272527	1.22153
ZNF574	4	0.272527	1.22129
CHUK	1	0.273223	-1.23404
NR5A2	6	0.274552	-1.21536
CRY1	3	0.274624	-1.2121
ICE1	4	0.274624	1.21114
PHF20	4	0.274624	1.21319
TOX4	2	0.274624	1.21152
ZNF488	2	0.274624	-1.21264
ARID5B	4	0.275167	1.20908
NPAT	3	0.276141	1.20621
NCAPG	14	0.276667	1.20426
E2F6	8	0.277546	1.20073
FOXM1	45	0.277546	1.20101
NR1H3	6	0.278549	1.19779
PCNA	3	0.279007	-1.28335
KAT6A	5	0.279062	1.19506
KDM6A	51	0.279749	1.19278
MED6	1	0.28093	-1.26305
RNASEH1	4	0.28093	1.1894
ZNF41	2	0.281345	1.18829
GATA1	128	0.28235	1.18339
HINFP	6	0.28235	1.18323
KDM4C	9	0.282866	1.18083
MXD4	4	0.282866	1.18051
ZBTB26	6	0.283308	1.17816
ZNF549	4	0.283308	-1.17858
HEY1	6	0.283861	1.17597
ORC1	5	0.283929	-1.17586
CHD8	14	0.284184	1.17308
KAT6B	1	0.284184	1.17206
RBMX	2	0.284184	1.17231
AIM2	2	0.284376	1.35594
CDYL2	2	0.284376	1.16425
CHAMP1	4	0.284376	1.16279
CTCFL	30	0.284376	1.16273
HHEX	14	0.284376	1.16993
HMG20A	4	0.284376	1.16949
ING2	1	0.284376	1.16042
MAFG	9	0.284376	1.16084
MLXIP	12	0.284376	1.16211
PITX1	3	0.284376	1.16266
RBFOX2	15	0.284376	1.16162
SNIP1	6	0.284376	1.15812
TRIP13	2	0.284376	-1.1703
ZBTB44	5	0.284376	-1.16002
ZC3H10	2	0.284376	-1.16613
ZNF175	4	0.284376	1.15847
ZNF614	2	0.284376	1.16213
BOD1L1	2	0.287104	1.20806
HMGN3	1	0.287104	1.15128
KDM1B	10	0.287104	1.1499
EMX1	2	0.287804	-1.13959
ILK	2	0.287804	1.14267
KDM5D	2	0.287804	1.14063
MTF1	5	0.287804	1.14499
MYOG	5	0.287804	-1.14278
NFE2L1	5	0.287804	1.13879
PHF5A	1	0.287804	1.14332
POLR3C	4	0.287804	1.1444
RFX1	10	0.287804	-1.14536
ZBTB1	6	0.287804	1.14112
ZNF140	4	0.287804	1.14146
ZNF576	2	0.287804	1.13884
ZNF580	4	0.287804	1.14048
KLF8	2	0.289961	1.13283
POU2F1	33	0.290274	1.12856
TFCP2	6	0.290274	1.1287
TSHZ1	5	0.290274	-1.1309
XRCC5	8	0.290274	1.12846
ZNF770	4	0.290274	1.12824
HMGXB4	6	0.292242	1.11795
HNRNPUL1	6	0.292242	-1.11793
MNX1	2	0.292242	1.11828
RORB	2	0.292242	1.12504
TRRAP	2	0.292242	1.11854
ZFP82	2	0.292242	1.12065
ZNF184	8	0.292242	1.11792
ZNF217	10	0.292242	1.11986
ZSCAN9	2	0.293065	1.11534
EHMT1	2	0.293542	1.12697
TGIF2	2	0.293793	1.11225
RBM34	2	0.294635	-1.11118
NFE2	15	0.294771	1.10861
KANSL3	4	0.295982	-1.111
ZBED5	2	0.295982	1.10374
ZGPAT	2	0.295982	1.10219
ZNF740	6	0.295982	1.10227
ZNF891	2	0.295982	1.10528
BMI1	53	0.297127	1.09591
INTS5	2	0.297127	1.09728
MCM3	6	0.297127	1.09705
SIRT6	16	0.297127	1.09603
TRIM28	66	0.297127	1.09712
S100A9	8	0.297311	-1.14662
ZNF589	5	0.297441	1.09376
PRDM10	6	0.297541	1.09273
DCP2	4	0.298025	1.08986
PGBD5	1	0.298025	-1.11204
RXRB	2	0.298025	1.08989
STAG2	55	0.298025	1.08863
CC2D1A	2	0.298403	1.08423
NR2E1	1	0.298403	1.20384
TAF1C	1	0.298403	1.09054
TCF21	13	0.298403	1.08401
ZNF425	2	0.298403	-1.08902
ZNF701	2	0.298636	-1.08402
CDKN1B	11	0.298989	1.08069
SPDEF	7	0.298989	1.08052
RBM26	3	0.299071	1.09344
SP140L	2	0.299093	1.07884
DTL	1	0.300416	1.07445
ZNF558	4	0.300416	1.07487
KAT2A	19	0.300831	1.0728
TP53	376	0.301215	1.06969
TRIB3	5	0.301215	1.06987
ZNF483	2	0.301215	1.07079
MIER1	2	0.302437	-1.06315
MLLT10	3	0.302437	1.06512
NCOA1	33	0.302437	1.06474
NR1H4	2	0.302437	1.06367
TSC22D2	4	0.302437	1.0631
ZBTB33	43	0.302437	1.06284
ZC3H11A	3	0.303275	1.06041
ZNF414	4	0.304015	1.05776
RBL1	1	0.305091	1.05476
PCBP1	6	0.305347	1.05335
XRCC4	5	0.305347	1.05019
ZBTB7B	4	0.305347	1.05256
ZNF189	3	0.305347	1.05149
ZNF543	2	0.305347	1.05086
ZNF761	2	0.305347	1.0497
ATF7IP	1	0.306881	1.05094
MYCN	120	0.306881	1.04569
ZNF331	9	0.30814	1.04157
L3MBTL2	6	0.309529	1.03717
SPEN	2	0.309529	1.03766
KDM1A	140	0.310655	1.03407
CCNT2	1	0.310703	1.02241
ELL2	20	0.310703	1.02714
MGA	12	0.310703	1.02925
NONO	12	0.310703	1.02512
OSR2	2	0.310703	-1.02417
PGR	168	0.310703	1.02637
PKM	1	0.310703	1.08052
PRDM6	2	0.310703	1.02201
SCMH1	2	0.310703	1.02952
SCML2	10	0.310703	-1.03045
SP1	41	0.310703	1.026
ZNF260	2	0.310703	-1.03058
ZNF274	24	0.310703	1.02329
ZNF281	6	0.310703	1.02485
ZNF664	2	0.310703	1.02812
ZNF773	2	0.310703	1.02812
GATA6	27	0.313074	1.01254
PATZ1	9	0.313074	1.01307
TEAD2	4	0.313074	1.01328
TOP2A	16	0.313074	-1.01333
TOP2B	28	0.313074	1.01351
ZC3H8	7	0.313074	1.01597
CPSF2	4	0.313321	1.01128
ALYREF	2	0.313751	-1.01628
ASF1A	1	0.313751	1.00927
GNL3	1	0.313751	1.01917
NR0B1	2	0.313751	-1.00999
POLR2C	24	0.313751	1.00592
ZNF446	2	0.313751	1.00816
ZFHX2	2	0.315443	1.00166
ID1	1	0.315827	-1.01511
MSH6	2	0.315827	-1.00337
NFIA	2	0.315827	1.0001
TAF2	5	0.315827	0.994864
TFAP2A	45	0.315827	0.997349
XRN2	16	0.315827	0.994268
ZNF350	4	0.315827	0.994198
ZNF510	4	0.315827	0.997661
ZNF548	4	0.315827	0.996598
ZNF20	2	0.316091	0.993266
DNAJC2	1	0.316404	-1.0405
CPSF6	6	0.317293	0.987061
DNMT3B	35	0.317293	-0.987516
GATAD1	5	0.317293	0.986724
SAP130	2	0.317293	0.98884
U2AF1	6	0.318149	0.984233
NR2F2	27	0.318218	0.981975
PAXIP1	11	0.318218	0.983289
ZNF552	2	0.318218	0.981903
SOD1	9	0.318466	-0.993362
ZNF263	8	0.318466	0.979686
ZNF555	2	0.318466	0.979567
PHF19	7	0.31848	0.979551
MEAF6	4	0.318795	0.976981
ARID3A	6	0.319502	0.971434
CREBL2	1	0.319502	-1.72091
CTBP1	14	0.319502	0.972908
DRAP1	3	0.319502	0.966814
KDM2A	4	0.319502	0.96737
MORC2	14	0.319502	0.966972
NXF1	2	0.319502	-0.986212
SOX6	6	0.319502	0.970293
TAF3	4	0.319502	0.968235
XRCC3	2	0.319502	-0.971357
ZFY	4	0.319502	0.973069
ZNF92	1	0.319502	-0.966999
BPTF	4	0.321588	0.96097
TCF25	1	0.321588	0.961103
MED13	2	0.322163	0.954708
MNT	18	0.322163	0.956681
PHC1	6	0.322163	-0.95838
THAP1	2	0.322163	0.957066
ZKSCAN3	2	0.322163	-0.95711
ZNF19	2	0.322163	-0.958533
ZNF585B	2	0.322163	-0.956203
KDM6B	14	0.322346	0.949983
MAPK14	4	0.322346	0.946664
MYBBP1A	14	0.322346	0.950959
PDHA1	1	0.322346	1.01073
PPP2R1A	14	0.322346	0.947073
QRICH1	2	0.322346	-0.950605
SATB2	2	0.322346	0.946563
ZNF343	2	0.322346	0.952289
ZNF544	3	0.322346	0.946995
ZSCAN20	6	0.322346	0.946935
ZSCAN31	2	0.322346	0.949347
ISL1	29	0.32305	0.943652
THRA	14	0.32305	0.943435
LMNA	95	0.323255	0.942287
SF3B1	5	0.323414	-0.949431
TERF1	4	0.323414	0.939887
ZBTB12	4	0.323414	0.939927
CDK11A	8	0.324745	-0.946056
LMTK3	2	0.324745	0.936661
FUBP3	2	0.326473	0.929454
SMARCA5	7	0.326473	0.92862
TEAD3	3	0.326473	0.929118
ZNF526	2	0.326473	0.928464
ZNF707	6	0.326473	0.931041
ZSCAN5A	4	0.327007	0.926681
HJURP	2	0.327294	-0.927679
CBX1	8	0.327555	0.92256
DNMT1	12	0.327555	0.92289
TSC1	1	0.327555	0.924317
SAMD1	8	0.328891	0.919164
FOXC2	1	0.329109	0.917692
ZNF10	4	0.329109	0.917219
OGT	5	0.329977	0.914652
ZKSCAN8	4	0.331031	0.911759
ZNF101	4	0.331711	0.909703
ZNF383	2	0.332903	0.906794
HOXB1	1	0.33336	-0.946577
ZNF335	5	0.33336	0.904052
APC	3	0.333661	0.902099
TWIST1	38	0.333661	0.902
ZNF77	2	0.333741	-0.904678
ATR	4	0.333839	-0.900323
ZNF607	2	0.333979	0.899207
ZNF302	4	0.334605	-0.897872
ZNF394	2	0.335245	0.895159
NOTCH3	8	0.335338	-0.897566
ZNF256	2	0.336152	0.891936
STAT5A	42	0.336449	0.890521
SCML4	2	0.337008	0.898867
TCF7L1	15	0.337008	0.888149
GTF3C5	2	0.337611	0.885336
WDR82	2	0.337611	-0.885768
HOXB7	5	0.337819	-0.888841
ZNF165	3	0.339167	-0.881681
HNF4G	11	0.33935	0.879551
LEF1	36	0.339665	0.87792
WRN	4	0.339665	-0.899099
PRDM11	2	0.340644	0.873764
TFCP2L1	2	0.340644	0.873719
ZNF251	2	0.340644	0.874827
KLF14	2	0.341243	-0.871419
FOXB1	4	0.342776	0.867218
PRRX2	2	0.342776	-0.867236
SOX5	2	0.342776	0.867095
SAFB2	6	0.343299	0.863605
ZNF850	2	0.343299	0.864327
CRTC1	10	0.343339	0.861924
KLF15	2	0.343339	-0.862378
PTEN	4	0.343339	0.860668
ZNF180	2	0.343339	0.861127
CEBPE	1	0.343885	0.857098
GRHL3	3	0.343885	0.856176
KDM5C	14	0.343885	-0.858538
MXI1	11	0.343885	0.856803
ZNF593	4	0.343885	0.859542
MBD2	16	0.344313	0.853709
RBL2	9	0.344313	0.854357
TCEA2	2	0.344581	0.853059
FOXH1	2	0.344772	0.847321
GPN1	2	0.344772	0.849106
KDM4A	5	0.344772	0.849185
LHX4	1	0.344772	-0.856764
ORC2	2	0.344772	0.846324
PSMD1	1	0.344772	-0.848369
PTBP1	6	0.344772	0.848551
SUPT6H	22	0.344772	0.851225
ZMYM2	3	0.344772	0.847429
SIRT3	4	0.34542	-0.86676
ZNF775	2	0.346295	0.841434
PRDM12	2	0.346518	0.840674
NOS2	1	0.348231	0.837372
HOXB6	3	0.348885	0.835389
MDN1	9	0.350962	0.831275
MIXL1	3	0.350962	0.82523
TBX5	10	0.350962	0.825953
TGIF2LX	1	0.350962	0.828511
ZNF433	2	0.350962	0.828593
ZNF8	4	0.350962	-0.825471
CHD2	9	0.352633	0.820382
ZNF837	2	0.352633	0.821236
HOXA3	2	0.353	0.818925
GZF1	3	0.35381	0.816604
GLYR1	34	0.355146	0.813126
KLF9	6	0.355225	0.811558
ZFP2	2	0.355225	0.811865
CSTF3	6	0.355706	0.80751
LHX6	1	0.355706	-0.824766
MAPK1	8	0.355706	0.807685
PALB2	1	0.355706	0.80832
RERE	2	0.355706	0.805053
SNAI1	4	0.355706	0.80498
SYNCRIP	2	0.355706	-0.842732
UBR5	7	0.355706	-0.80581
GREB1	6	0.357295	0.800479
SKP2	2	0.357295	0.800297
PCGF2	19	0.358185	0.7978
APOBEC3B	4	0.359456	0.794518
SON	2	0.359456	-0.794286
PRAME	1	0.361026	0.789888
CTR9	27	0.361971	0.787283
CUL3	8	0.362015	0.790216
HNRNPL	12	0.362015	-0.785041
KMT2C	33	0.362015	0.785319
FOXP2	3	0.362132	0.784107
CDK2	3	0.362172	-0.786082
SRSF9	6	0.362172	0.784688
THAP11	14	0.362172	0.782972
SIX5	5	0.362331	0.780882
TET2	57	0.362331	0.780177
ZMYND11	5	0.362598	0.779823
FOXF1	6	0.363178	-0.777111
L3MBTL3	1	0.363412	-0.77702
ZNF423	4	0.363535	-0.774955
SNAPC5	3	0.364961	-0.772479
ZBTB42	2	0.364961	0.771202
NR2F1	11	0.365883	0.768035
ZNF511	2	0.366889	0.765308
ZNF501	4	0.367427	0.763494
HOXC11	3	0.367641	0.768417
PHF6	6	0.367954	0.761023
U2AF2	7	0.368527	-0.759258
CUX1	16	0.370493	0.752107
GTF2H2C	1	0.370493	0.780277
PREB	2	0.370493	0.752259
SNAPC2	3	0.370493	-0.756682
ZNF25	2	0.370493	0.751724
SS18L1	4	0.371222	0.749479
FBXO44	1	0.371739	0.918209
ZNF622	2	0.371807	0.74806
LIN28B	3	0.372149	0.745532
ZNF473	2	0.372409	0.744574
CHD3	1	0.372593	0.743589
CREB3L1	3	0.372593	0.734833
DUX4	6	0.372593	0.740701
HNF4A	53	0.372593	0.735512
PITX3	1	0.372593	0.735118
RBAK	4	0.372593	0.7359
SPIN1	2	0.372593	0.737183
TERF2	4	0.372593	0.742103
TOP1	58	0.372593	0.74309
ZBTB7A	18	0.372593	0.736494
ZNF30	2	0.372593	0.740231
ZNF37A	2	0.372593	-0.736582
ZNF587	2	0.372593	-0.747728
RNF20	1	0.372649	0.77346
TFEB	10	0.372922	0.732756
ZNF76	5	0.37378	0.730321
DMRT2	1	0.378536	-0.744926
PRMT6	1	0.378536	0.721812
HOXB5	3	0.379913	-0.715908
RAD21	459	0.37997	0.71496
PCGF1	8	0.380057	0.71389
PHF10	6	0.380057	-0.717633
MBD1	7	0.380494	0.710621
PTF1A	4	0.380494	-0.710596
ZIC2	7	0.380494	0.710411
BNC2	3	0.380691	-0.709403
TFAM	7	0.381221	-0.709964
SP7	2	0.381698	0.705881
USP22	4	0.383683	-0.706186
ZNF674	2	0.383683	0.699877
ZSCAN5C	2	0.383683	-0.700267
CHD6	13	0.384985	0.695741
HSP90B1	1	0.384985	0.696359
ZBTB37	2	0.387953	0.689148
GABPB2	2	0.389177	0.686921
ZNF367	2	0.389238	0.685129
JMJD6	18	0.389762	0.683327
CERS6	2	0.390358	0.681046
ZNF557	2	0.390358	0.680787
HDAC3	22	0.390813	0.679116
PLAG1	3	0.391429	0.677183
TFAP2B	3	0.392227	0.674166
ZNF398	6	0.392227	0.674454
AHCTF1	1	0.392671	-0.678011
OVOL1	2	0.392671	0.670488
REPIN1	2	0.392671	0.672248
ZSCAN32	2	0.392671	0.671647
EGR2	5	0.39308	0.668949
CUL4A	5	0.393195	0.667252
NCOA3	37	0.393195	0.667008
ZBTB8A	6	0.393195	0.666615
AGO2	7	0.39353	0.664543
ZNF197	2	0.39353	0.66478
AATF	3	0.393847	-0.674356
ZMAT4	2	0.393847	-0.664007
CREB5	8	0.394576	0.660387
ERCC8	2	0.395385	-0.658204
EGFR	4	0.396019	-0.662188
HOXA9	5	0.397315	0.653176
ZNF26	2	0.397335	0.652731
CHAT	2	0.397602	-0.650079
MYF6	1	0.397602	-0.65941
TTF2	2	0.397602	-0.65141
GTF3A	2	0.39788	0.648257
AKAP8	2	0.398101	0.646965
NUDT21	6	0.399187	-0.645077
NFYC	3	0.400164	0.64142
ZFHX4	2	0.400187	-0.641383
ASH1L	6	0.400276	0.639368
ZNF514	2	0.400276	0.639962
PAPOLG	3	0.400488	0.63835
ZNF596	2	0.401276	0.635763
GATAD2A	14	0.402619	0.631099
NCAPG2	2	0.402619	-0.631161
ZBTB43	2	0.402619	0.630195
ZNF579	2	0.402619	0.630214
GTF3C1	10	0.402982	0.628754
COBLL1	2	0.404279	-0.627583
RORC	2	0.404415	0.624483
MED31	2	0.405079	-0.62455
ASCL1	62	0.407023	0.617628
NKX2-2	1	0.407023	0.615559
SCRT2	2	0.407023	0.615376
TOX2	2	0.407023	0.617357
ZNF207	9	0.407023	0.614362
ZNF711	7	0.407023	0.614783
CBFA2T3	7	0.40728	0.612428
ID2	1	0.40728	-0.618936
LIN54	2	0.40728	0.611311
WTAP	2	0.40728	0.61148
CDC73	22	0.407352	0.608934
DMTF1	2	0.407352	0.60557
ELAVL1	2	0.407352	-0.631089
HOXA13	4	0.407352	0.604967
NRF1	45	0.407352	0.604596
OTX1	2	0.407352	0.607157
SMAD9	2	0.407352	0.606739
ZNF214	2	0.407352	-0.607477
ZNF569	2	0.407352	0.608434
NEDD4	6	0.408624	-0.60247
NKX2-5	10	0.408689	-0.600536
ZNF354B	4	0.408842	-0.599683
C17orf49	4	0.409238	0.598052
DDX11	4	0.409829	-0.609859
ZNF791	2	0.409953	0.595694
CRX	2	0.410176	0.608614
PRDM4	8	0.410176	-0.59335
HSF4	2	0.410376	0.59284
ZNF449	4	0.410738	0.590815
F2RL1	1	0.41085	-0.597949
BRCA2	4	0.411058	0.588793
ZNF507	6	0.411171	-0.587925
GTF2H2	1	0.411439	0.618872
SALL2	5	0.411439	0.586085
ZNF600	2	0.411959	0.584156
RBBP4	4	0.413483	0.580386
ARNTL	59	0.413972	0.578702
PDS5A	4	0.414089	0.577773
CPSF1	6	0.414696	-0.574083
KLF13	7	0.414696	0.573515
RAC1	16	0.414696	0.573937
RIOK2	1	0.414696	-0.576378
RYBP	12	0.414696	0.575478
ZFP42	3	0.414696	0.572986
CGGBP1	2	0.415063	0.570919
ZBED4	2	0.415063	0.570057
ZNF529	2	0.415063	-0.570048
LHX5	1	0.415186	-0.575054
GLI2	4	0.416625	0.564436
PCGF6	5	0.416625	0.564715
CBX4	4	0.417415	0.559706
ELANE	1	0.417415	-0.561589
ESRRA	16	0.417415	-0.559021
MCM2	25	0.417415	0.56077
SET	2	0.417415	-0.559928
SMYD3	4	0.417415	-0.56111
ZSCAN12	2	0.417415	0.557875
JADE3	1	0.417912	0.55612
MITF	56	0.418348	0.553843
VCP	9	0.418348	-0.554195
SCRT1	2	0.419126	-0.551594
FOSB	3	0.419254	0.547673
KAT5	2	0.419254	0.54892
MED30	2	0.419254	0.554805
NLRP2	3	0.419254	0.550757
ZNF586	2	0.419254	0.548415
ZNF830	8	0.419254	0.547741
TOX	2	0.419609	-0.546044
MBD6	7	0.421185	-0.541847
KLF16	6	0.421441	0.540326
ZNF660	4	0.421441	0.539239
ZSCAN22	2	0.421441	0.539811
CIZ1	1	0.422283	0.546462
PPARG	54	0.422283	-0.535583
RCOR2	6	0.422283	0.535458
PDX1	8	0.422932	0.533047
ZNF337	2	0.422932	0.532757
BRF2	4	0.423971	-0.531789
ZNF134	2	0.42422	0.528887
TBX18	2	0.424792	0.527079
SUPT16H	3	0.425659	0.526056
ZNF362	4	0.425659	0.524411
BBX	1	0.426244	-0.531642
DBP	2	0.426244	-0.517822
EPOP	5	0.426244	-0.518785
ESR1	1220	0.426244	0.504507
FANCM	2	0.426244	-0.509694
FOXR2	2	0.426244	-0.512979
FXR2	1	0.426244	0.511845
GLIS2	2	0.426244	0.510199
HDAC8	3	0.426244	0.505937
HNRNPC	2	0.426244	0.514642
MDM2	8	0.426244	0.505591
NCOA2	13	0.426244	-0.512614
NR2F6	11	0.426244	0.514842
ONECUT1	12	0.426244	0.50573
PAX7	1	0.426244	-0.509978
PCBP2	6	0.426244	0.50699
SALL1	2	0.426244	0.512594
TCF15	2	0.426244	0.508421
UBE3A	12	0.426244	0.522092
ZBTB3	5	0.426244	0.513643
ZEB1	21	0.426244	0.508132
ZFP62	2	0.426244	-0.517582
ZNF215	2	0.426244	0.515292
ZNF324	4	0.426244	0.506852
ZNF747	2	0.426244	-0.508724
ZNF79	2	0.426244	0.505211
CDX4	2	0.426679	0.503717
SP2	7	0.426979	0.501623
SOX18	2	0.42776	0.498796
ZNF391	2	0.42776	0.498662
MYBL1	1	0.428582	-0.505359
PHF20L1	1	0.429538	0.511095
SOX21	1	0.429538	-0.494177
YTHDC1	10	0.430132	-0.491326
ZFC3H1	5	0.430178	0.490283
SOX15	2	0.431331	-0.488587
ATF5	2	0.431602	0.485108
USF2	28	0.431602	-0.483847
ZNF266	3	0.431602	0.484427
ZNF84	3	0.431602	-0.484264
POLA1	2	0.431614	0.483207
FBL	6	0.432441	0.489172
ING4	1	0.432441	-0.481719
BRDT	1	0.432712	-0.479244
ZNF23	4	0.432856	0.478062
SMARCE1	17	0.433392	0.47602
ZNF692	2	0.434025	0.474031
MATR3	2	0.434124	-0.474739
PROSER1	6	0.43415	0.472387
PRMT3	2	0.435871	-0.518107
SP4	1	0.435871	0.468115
PHB2	4	0.435967	-0.466007
SOX8	3	0.435967	0.466448
CEBPZ	5	0.436116	-0.464929
DNA2	1	0.436116	0.466816
BAHD1	3	0.436578	-0.462949
ZNF174	4	0.436578	-0.462146
NR4A2	5	0.437697	-0.461926
RREB1	5	0.437697	0.457477
ZNF57	2	0.437697	-0.458668
ADNP2	1	0.439437	-0.475515
DDX55	4	0.439437	-0.452
FOXN3	4	0.439437	-0.450546
HDAC9	8	0.439437	0.447597
HIC2	8	0.439437	0.446614
IFI16	2	0.439437	0.447291
RFX7	3	0.439437	0.450777
SMARCD1	2	0.439437	0.451642
THAP4	1	0.439437	-0.475515
TRPS1	23	0.439437	0.446849
YWHAZ	2	0.439437	0.449042
TIGD3	2	0.440107	0.44368
WT1	10	0.440107	0.44291
ZNF786	2	0.440107	0.442834
ZNF311	4	0.440768	0.440847
CSDC2	2	0.443357	0.434803
PHIP	14	0.445292	0.43003
ZNF234	2	0.445997	0.427902
SUMO1	9	0.447052	0.425012
NUP153	2	0.447259	-0.426087
ANAPC1	3	0.447435	-0.42377
HIVEP3	1	0.448837	-0.434169
MAP2K1	4	0.448837	-0.419482
REST	117	0.448837	0.418889
ZBTB20	2	0.448837	0.41706
ZFP1	4	0.448837	0.416467
YBX1	16	0.448935	0.415659
ZNF211	2	0.449086	0.414959
ZNF785	4	0.449086	0.413881
TCFL5	3	0.449266	0.413296
BACH1	19	0.449569	0.409629
DNMT3A	17	0.449569	0.40986
MBD3L2	1	0.449569	-0.409329
SFMBT1	2	0.449569	0.409412
ZNF592	8	0.449569	0.411434
ZNF213	2	0.449751	0.407618
SLC30A9	4	0.449797	0.406813
CHD7	19	0.44992	0.404664
CUL4B	3	0.44992	0.405757
DPF1	4	0.44992	-0.407308
MED4	1	0.44992	-0.415341
ARNT2	1	0.450192	0.396936
BRWD1	2	0.450192	0.397011
CSRNP3	2	0.450192	0.39188
DMC1	8	0.450192	0.390459
EWSR1	13	0.450192	0.391968
HOXD4	1	0.450192	0.403897
ISX	2	0.450192	0.393957
LHX2	3	0.450192	-0.396428
NFYA	13	0.450192	0.393225
PRDM14	2	0.450192	-0.396055
SIRT1	12	0.450192	0.3921
TRERF1	2	0.450192	-0.401729
TUBG1	7	0.450192	-0.405549
ZNF155	2	0.450192	0.389799
ZNF169	2	0.450192	-0.396163
ZNF202	2	0.450192	0.39739
ZNF397	2	0.450192	0.389949
ZNF611	1	0.450192	0.396962
ZNF843	2	0.450192	-0.396792
ZNHIT1	1	0.450192	0.402854
MED16	8	0.450609	0.386015
RBM15	10	0.450609	-0.383241
ZBTB34	2	0.450609	0.384063
ZNF2	2	0.450609	0.382278
ZNF641	2	0.450609	-0.384076
ZNF677	2	0.450609	0.386048
ZNF704	2	0.450609	0.384754
ZNF71	2	0.450609	0.383137
ZSCAN16	2	0.450609	0.382273
ZNF253	2	0.450723	-0.382119
RLF	3	0.450935	0.37948
SMC3	149	0.450935	0.379777
ASPSCR1	17	0.451701	-0.37424
HES2	32	0.451701	-0.376133
MED8	2	0.451701	-0.378243
TEF	2	0.451701	0.374684
ZNF18	2	0.451701	-0.375314
ZNF248	2	0.451701	0.373975
ATOH1	2	0.451727	-0.370373
CLOCK	14	0.451727	-0.369611
HIF3A	2	0.451727	0.373295
NFIB	17	0.451727	0.369491
PCGF3	8	0.451727	0.373273
SMC4	1	0.451727	-0.384531
AHR	73	0.452687	0.366503
CASP8AP2	2	0.452687	-0.363592
NABP2	2	0.452687	0.362288
RAD51	16	0.452687	-0.364963
RBBP8	7	0.452687	-0.383491
ZBTB10	5	0.452687	0.364434
ZBTB14	2	0.452687	-0.365188
ZNF532	4	0.452687	0.363596
DDX20	6	0.453666	-0.359193
WDR33	4	0.453749	0.35832
BCL6B	2	0.453971	0.355639
FOXS1	2	0.453971	-0.355252
LDB2	1	0.453971	-0.355331
PPARD	2	0.453971	0.357157
IRX2	3	0.454304	-0.352737
NR1I2	1	0.454304	-0.35695
ZNF280A	2	0.454304	0.354116
ZNF346	2	0.454304	-0.351633
STAG3	8	0.454544	-0.350452
SUPT20H	6	0.454545	-0.350032
HOXB8	3	0.454573	-0.349
CBX7	20	0.455704	-0.345894
ASXL2	2	0.456403	-0.340947
HOXD11	2	0.456403	-0.345646
ZNF282	4	0.456403	-0.341134
ZNF410	8	0.456403	0.344334
ZNF670	2	0.456403	-0.342374
GLIS3	3	0.456964	-0.337203
HAT1	3	0.456964	-0.337749
LIG4	14	0.456964	-0.33779
NFATC4	2	0.456964	-0.337972
NUP214	2	0.457	0.341752
SP5	2	0.457	0.334508
ZEB2	7	0.457	0.334148
ZNF223	2	0.457	-0.335368
ADAR	2	0.457286	0.338083
KLF7	2	0.457286	-0.33198
PRMT5	4	0.457286	0.330147
ZFP69B	2	0.457286	-0.330988
ZNF597	2	0.457286	-0.332485
DACH1	2	0.457538	0.327543
NEUROD2	1	0.457538	-0.332072
USF3	2	0.457538	0.328429
HOXA11	1	0.457554	0.329219
MBD5	4	0.457554	-0.325693
SAG	2	0.457554	0.329219
PCGF5	1	0.45769	-0.328346
ZNF347	2	0.45769	-0.325996
UBE2I	2	0.458466	0.321989
SIX2	10	0.459458	0.317849
ZFP36	10	0.459458	0.318139
SOX3	3	0.459587	-0.316774
THRAP3	2	0.459587	-0.316209
RPA1	3	0.460328	0.314086
PRDM2	4	0.46101	-0.311783
ZBTB49	4	0.46133	0.310376
MYOD1	31	0.462608	0.306917
AUTS2	1	0.462659	-0.308348
ZNF408	2	0.464712	-0.301736
CDC5L	3	0.464933	-0.299904
CBFA2T2	3	0.466303	-0.296191
ZNF577	4	0.466401	0.295291
CHD4	41	0.466453	0.291859
HMGA2	6	0.466453	-0.292609
INSM2	2	0.466453	0.291191
JDP2	1	0.466453	0.290417
OVOL2	4	0.466453	-0.293862
PHTF2	2	0.466453	0.294217
TRIM22	8	0.466453	0.290308
FOXO4	4	0.466678	-0.289293
ZBTB2	3	0.466678	0.288441
ZNF382	4	0.467106	0.286813
BUB3	1	0.467414	0.284102
HES1	4	0.467414	-0.285005
HK2	9	0.467414	-0.285863
CSE1L	2	0.467582	-0.284175
HOXD13	1	0.467582	0.287225
NR3C2	3	0.467582	0.282908
TAF5L	4	0.467955	0.280185
NKX2-3	1	0.468705	-0.280014
NRIP1	2	0.468705	-0.276041
REC8	2	0.468705	0.273725
ZNF227	2	0.468705	0.27552
ZNF513	4	0.468705	0.2767
ZNF764	2	0.468705	-0.274048
ZSCAN26	2	0.468705	-0.275073
MYNN	11	0.468763	0.271264
PBX2	7	0.468763	0.270448
USF1	16	0.468763	0.270158
ZBTB5	6	0.468763	-0.271662
ZNF444	4	0.468763	0.270037
SIX4	5	0.46952	-0.267689
HOXC8	1	0.47027	-0.263606
POU3F2	6	0.47027	0.261259
SRPK1	2	0.47027	0.264129
TDRD3	1	0.47027	-0.261605
ZIC5	9	0.47027	0.26232
ZNF571	2	0.47027	0.262796
ZNF70	2	0.47027	0.262271
ARNTL2	1	0.470712	-0.260794
CBX6	2	0.470712	0.258625
NFE2L3	1	0.470712	-0.264902
TCEAL8	1	0.470712	0.262291
OLIG2	14	0.470803	0.256366
ZNF626	2	0.470803	-0.256112
ZNF292	2	0.471156	0.255198
ERCC6	6	0.473004	-0.24969
KLF17	4	0.473276	0.248245
TRIM37	1	0.473276	-0.248617
RARG	2	0.474794	0.243717
NFXL1	8	0.475079	-0.242328
AKNA	2	0.475573	0.238219
CREB3	4	0.475573	0.239659
ID3	5	0.475573	0.237288
MESP1	2	0.475573	0.236605
QKI	4	0.475573	-0.239674
SLFN5	1	0.475573	0.238724
ZNF277	2	0.475573	0.236897
AGO1	15	0.475637	-0.23516
HMGN2	4	0.475637	-0.234801
KDM3B	4	0.475637	0.233831
NR5A1	9	0.475637	0.233397
POLQ	1	0.475766	0.233484
PARP1	6	0.475815	0.231652
DNMT3L	1	0.475987	0.2346
FEZF1	2	0.475987	-0.229883
SLBP	4	0.476209	-0.226638
SMARCA1	1	0.476209	-0.228778
YBX3	2	0.476209	0.226338
ZNF404	2	0.476209	-0.227545
ZNF624	4	0.476209	-0.226482
ZBTB24	3	0.477088	0.223289
NCOA5	2	0.47886	0.218149
ZNF565	2	0.47886	0.218507
ZBTB9	14	0.478944	0.217004
AICDA	6	0.479516	-0.214452
TEX10	14	0.479516	0.215847
NCAPH2	8	0.480287	0.211922
EN1	14	0.481345	0.197633
ETS2	3	0.481345	0.199674
FOXJ2	3	0.481345	0.198694
HDAC4	7	0.481345	-0.207894
HSF2	26	0.481345	-0.208141
MED7	2	0.481345	-0.202289
NFYB	15	0.481345	0.201874
RCOR3	2	0.481345	-0.205097
RHOXF2B	2	0.481345	0.202974
ZFP36L2	2	0.481345	0.204208
ZKSCAN5	2	0.481345	-0.19698
ZNF436	2	0.481345	-0.207239
ZNF445	2	0.481345	-0.198113
ZNF462	2	0.481345	0.200483
ZNF486	2	0.481345	0.206693
ZNF680	2	0.481345	0.202732
ZSCAN18	4	0.481345	0.205307
ZXDB	2	0.481345	0.200556
CSDE1	6	0.481394	-0.196157
MED21	2	0.481493	0.197399
EZH1	5	0.48155	0.193744
MIER2	2	0.48155	0.194236
EBF3	9	0.481653	-0.192772
CSTF2	18	0.481911	-0.190884
ZNF3	5	0.481911	-0.1908
GRHL1	3	0.483001	0.187656
ADNP	4	0.483062	0.177661
DPPA3	1	0.483062	-0.17907
HDGF	11	0.483062	0.186058
HOXA7	2	0.483062	0.182671
LRRFIP1	2	0.483062	-0.176981
NKX2-8	1	0.483062	-0.185874
PAX2	3	0.483062	-0.180802
PPARGC1A	1	0.483062	-0.179188
PRKCQ	10	0.483062	-0.184834
SHOX2	2	0.483062	0.184052
SIPA1	1	0.483062	0.178838
UBE2A	2	0.483062	0.183805
ZBTB17	15	0.483062	0.176703
ZNF280C	4	0.483062	-0.183054
ZNF671	2	0.483062	-0.178082
ZSCAN4	5	0.483062	0.181421
PDS5B	4	0.483294	0.174378
ZNF551	2	0.483294	-0.175085
NHLH1	1	0.484575	-0.170073
POLH	1	0.484575	-0.170432
SETX	2	0.484575	0.169278
ZNF713	2	0.484575	0.168831
ARRB1	3	0.484737	-0.166494
ZNF561	4	0.484737	-0.166198
ZNF654	2	0.484737	-0.166303
KLF11	7	0.484887	-0.16235
NFE2L2	41	0.484887	-0.164988
THRB	4	0.484887	-0.164152
WDHD1	4	0.484887	0.165569
ZNF112	2	0.484887	-0.162539
NFIX	2	0.484892	-0.160997
OLA1	3	0.484892	-0.16231
DLX4	2	0.485685	-0.158109
SMN1	1	0.485685	0.160067
ZNF334	1	0.485742	0.1569
SMCHD1	4	0.486954	-0.153671
PRKDC	8	0.487198	0.152174
TSHZ2	2	0.487529	0.150707
HOXC9	2	0.487562	0.147819
MED9	1	0.487562	-0.149716
POU6F1	2	0.487562	-0.149354
ZNF696	2	0.487562	0.148557
ZNF581	1	0.488311	-0.146603
TRIM33	2	0.488425	-0.146445
ZNF157	2	0.488425	0.143763
HAND2	19	0.48864	0.133379
LRWD1	1	0.48864	-0.138029
MBNL3	2	0.48864	-0.136601
MTHFD1	4	0.48864	0.141477
NKX6-1	3	0.48864	0.138705
NR1D1	1	0.48864	-0.138029
PAX9	2	0.48864	-0.141419
SIX1	10	0.48864	-0.140531
WDR5	68	0.48864	0.133622
ZNF491	2	0.48864	-0.139752
ZNF583	2	0.48864	-0.134033
ZNF623	2	0.48864	0.13752
ZNF662	2	0.48864	0.135345
ZSCAN30	4	0.48864	0.133895
ATOH8	3	0.489011	0.130106
HOXB2	1	0.489011	-0.132817
ICE2	1	0.489011	0.129541
PAWR	2	0.489011	0.130066
ZNF524	10	0.489011	-0.129011
DKC1	6	0.489754	0.12672
NUFIP1	2	0.489759	-0.125917
HEYL	3	0.489886	-0.124914
ATM	2	0.490091	0.123818
ESRRB	2	0.490128	0.120171
GPS2	5	0.490128	0.119744
MED22	2	0.490128	-0.12018
TET3	4	0.490128	-0.122788
TFE3	20	0.490128	0.119177
ZNF132	2	0.490128	0.121374
ZNF212	2	0.490128	-0.118073
ZNF300	2	0.490128	-0.11976
ABI1	2	0.490387	0.115596
ARID3B	4	0.490387	-0.10289
BDP1	9	0.490387	-0.0948974
CHCHD3	2	0.490387	0.0942555
CPSF3	18	0.490387	-0.102368
CREB3L2	2	0.490387	-0.0928739
FOXQ1	1	0.490387	-0.103636
GPBP1L1	2	0.490387	0.0962278
GTF2F2	2	0.490387	-0.092062
HES5	1	0.490387	-0.0962556
HLTF	2	0.490387	-0.0940463
HOXB4	2	0.490387	0.102384
HOXC13	1	0.490387	-0.0979973
HOXD9	1	0.490387	-0.0916681
ID4	1	0.490387	0.118044
KCMF1	1	0.490387	-0.0916681
KLF10	5	0.490387	0.113068
LRIF1	1	0.490387	0.0967776
MED25	2	0.490387	0.108615
MZF1	2	0.490387	0.0991134
NEIL1	3	0.490387	0.106645
NFKBIA	1	0.490387	-0.105799
PADI2	2	0.490387	-0.116381
PIAS4	2	0.490387	0.105996
PPP1R10	11	0.490387	0.0999507
RAD21L1	2	0.490387	-0.110067
RFX2	2	0.490387	-0.100661
RNASEH2A	2	0.490387	-0.0969485
SOX11	2	0.490387	-0.108628
THAP7	2	0.490387	0.0991848
ZBTB6	2	0.490387	0.0899459
ZNF17	2	0.490387	0.101226
ZNF396	2	0.490387	0.0934683
ZNF490	2	0.490387	0.115812
ZNF521	2	0.490387	0.110357
ZNF570	2	0.490387	0.0983681
ZNF610	2	0.490387	0.0954678
ZNF75A	2	0.490387	-0.109091
ZNF778	4	0.490387	-0.10071
NCOA4	4	0.490965	0.0871931
ZNF621	2	0.490965	0.0874274
BRD8	4	0.49156	0.0850408
FERD3L	1	0.491764	-0.0848681
NPAS2	3	0.492274	0.0803203
PARK7	1	0.492274	-0.0790463
RPA2	7	0.492274	0.0785769
SP3	2	0.492274	0.0797668
ZFP30	4	0.492274	-0.0789583
ZNF250	2	0.492274	0.0812362
ZNF195	2	0.4927	0.0767386
ZFP14	2	0.49357	-0.0739247
BRF1	11	0.493777	-0.072701
ZSCAN23	2	0.494015	0.0711569
ZSCAN5B	4	0.494015	0.0708729
VSX2	2	0.494073	-0.0698629
BCL9	5	0.494276	0.0660355
FOXF2	3	0.494276	0.0653954
NR2E3	3	0.494276	-0.065098
PYGO2	6	0.494276	0.064432
RARB	6	0.494276	-0.0670034
ZNF560	2	0.494276	0.0648129
ZNF780A	2	0.494276	-0.0649721
CDX1	1	0.49462	-0.0573881
DICER1	1	0.49462	0.0633484
ELL	1	0.49462	-0.0563496
EPCAM	4	0.49462	0.0558803
HESX1	1	0.49462	-0.058751
METTL3	9	0.49462	0.0561371
MKI67	4	0.49462	-0.0561414
MLX	8	0.49462	-0.0593571
PURB	2	0.49462	0.0605951
SRPK2	2	0.49462	-0.0595187
SVIL	2	0.49462	0.055386
ZNF655	2	0.49462	-0.0577374
KDM2B	24	0.494751	0.0540988
SAFB	3	0.49477	0.0533475
ESR2	17	0.495887	0.0497432
ZNF133	4	0.495887	0.0492276
SALL4	8	0.495897	-0.046894
TOE1	9	0.495897	-0.0480809
ZNF512B	6	0.495897	-0.0463628
ZNF695	2	0.495897	-0.0477967
ALKBH1	1	0.497923	0.039949
CDAN1	1	0.497923	0.0335332
DROSHA	2	0.497923	0.0372641
HNRNPK	16	0.497923	-0.0343535
PPP2CA	10	0.497923	0.0340607
RBM17	2	0.497923	0.0363765
SERPINE1	4	0.497923	-0.0329092
ZHX1	4	0.497923	-0.0362724
ZNF416	6	0.497923	-0.0337249
ZNF484	2	0.497923	0.0383402
ZNF518B	2	0.497923	0.0342514
ZNF658	2	0.497923	-0.0368283
BARX1	2	0.498457	0.0307987
FUS	9	0.498457	0.0289978
GLMP	2	0.498457	-0.0301664
HIRA	8	0.498457	-0.028037
ZNF493	2	0.498457	-0.0285826
ZNF652	3	0.498622	0.0269189
GFI1B	14	0.499154	0.0241874
ZNF16	2	0.499154	0.0247517
ASXL3	5	0.499522	0.0218563
SUV39H1	4	0.499522	0.0222932
HMGN4	1	0.499542	0.0221687
COIL	6	0.499919	-0.0194575
CAMTA1	2	0.500207	-0.0161212
GLIS1	2	0.500207	-0.014827
KHSRP	4	0.500207	0.017728
NR1H2	11	0.500207	-0.0159535
SRSF4	4	0.500207	-0.015816
TRMT112	2	0.500207	-0.0145268
SP140	2	0.500573	-0.0128391
ALKBH3	1	0.500852	-0.0107049
CRTC2	2	0.500852	-0.0100061
OVOL3	2	0.500852	-0.0106694
ZNF239	4	0.501152	-0.00854671
ZNF700	2	0.501378	-0.00727735
ZSCAN21	2	0.502089	-0.00478554
CCNE1	3	0.502126	-0.00248299
CDYL	3	0.502126	0.000830081
DEAF1	5	0.502126	-0.000397815
HNRNPA2B1	4	0.502126	0.00242915
ZBTB46	2	0.502126	-0.00111566
ZNF717	2	0.502126	-0.00368348
